# Supplementary material for: A FUS3-VAL transcriptional negative feedback circuit terminates seed maturation program and safeguards vegetative development
Source: Research Square preprint supplement (doi:10.21203/rs.3.rs-7986565/v1), 2025-11-12
Supplement: Supplementary file 1 [file 01e96f8cb89104f910bb22df.xlsx]

## Sheet: annotation
Both seed development–related genes and genes with specific expression patterns were obtained from previously published datasets (Gazzarrini S, Song L. LAFL Factors in Seed Development and Phase Transitions. Annu Rev Plant Biol 75, 459-488 (2024).)
val1 val2 differentially expressed genes (DEGs) were derived from published datasets ( Yuan L, et al. The transcriptional repressors VAL1 and VAL2 recruit PRC2 for genome-wide Polycomb silencing in Arabidopsis. Nucleic Acids Res 49, 98-113 (2021).)

## Sheet: seed development–related genes
Gene ID	Gene Name
AT3G20660	AtOCT4
AT3G23790	AAE16
AT1G65880	AAE20					val1 val2-up	val1 val2-down
AT3G48990	AAE3					4828	3744
AT4G20070	AAH			pre-cotyledon	363	138	16	Overlap number (Observed)
AT5G20960	AAO1			embryo(transition)	142	85	2
AT3G43600	AAO2			embryo(mature green)	176	147	2
AT1G10010	AAP8			dry seed	354	247	20
AT5G40010	AATP1			germinating seed	344	102	35
AT1G15500	AATP2			root	1128	220	316
AT3G28345	ABCB15			SAM	181	47	43
AT2G47000	ABCB4			nascent tissue	18	2	7
AT3G59140	ABCC10			Leaf (vegetative)	52	1	40
AT3G21090	ABCG15			flowering	295	54	138
AT4G15230	ABCG30			Leaf (senescent)	810	255	86
AT2G36380	ABCG34			flower	354	88	52
AT1G15210	ABCG35			fruit	406	64	90
AT3G53480	ABCG37			immature anther	344	101	27
AT4G25750	ABCG4			Mature anther	1034	195	102
AT5G52860	ABCG8
AT5G02270	ABCI20
AT5G44110	ABCI21					val1 val2-up	val1 val2-down
AT3G24650	ABI3			Pre-cotyledon		53.3781	41.3935	Expected number
AT3G24650	ABI3			Embryo(transition)		20.8807	16.1925
AT2G40220	ABI4			Embryo(mature green)		25.8803	20.0696
AT2G40220	ABI4			Dry seed		52.0547	40.3672
AT2G36270	ABI5			Germinating seed		50.5842	39.2269
AT5G64750	ABR1			Root		165.869	128.628
AT4G27780	ACBP2			SAM		26.6155	20.6397
AT2G19590	ACO1			Nascent tissue		2.64685	2.05257
AT2G05710	ACO2			Leaf (vegetative)		7.64645	5.92964
AT3G05020	ACP1			Flowering		43.3789	33.6393
AT1G54580	ACP2			Leaf (senescent)		119.108	92.3656
AT5G27200	ACP5			Flower		52.0547	40.3672
AT3G01990	ACR6			Fruit		59.7012	46.2968
AT5G65110	ACX2			Immature anther		50.5842	39.2269
AT1G06290	ACX3			Mature anther		152.047	117.909
AT1G01750	ADF10
AT4G00680	ADF8					val1 val2-up	val1 val2-down
AT1G77120	ADH1			Pre-cotyledon		2.58533	0.386534	Observed /Expected
AT1G06080	ADS1			Embryo(transition)		4.07074	0.123514
AT3G44720	ADT4			Embryo(mature green)		5.68	0.0996534
AT1G60680	AGD2			Dry seed		4.74501	0.495452
AT5G13790	AGL15			Germinating seed		2.01644	0.892245
AT1G22590	AGL87			Root		1.32635	2.4567
AT1G69540	AGL94			SAM		1.76589	2.08336
AT5G64310	AGP1			Nascent tissue		0.755615	3.41036
AT4G40090	AGP3			Leaf (vegetative)		0.13078	6.74577
AT3G60330	AHA7			Flowering		1.24484	4.10234
AT2G16060	AHB1			Leaf (senescent)		2.14091	0.931082
AT5G51760	AHG1			Flower		1.69053	1.28817
AT5G49700	AHL17			Fruit		1.07201	1.94398
AT5G49700	AHL17			Immature anther		1.99667	0.688304
AT5G49700	AHL17			Mature anther		1.2825	0.865076
AT3G60870	AHL18
AT2G45430	AHL22
AT4G22810	AHL24
AT4G35390	AHL25
AT4G12050	AHL26
AT1G20900	AHL27
AT1G76500	AHL29
AT5G39720	AIG2L
AT1G72570	AIL1
AT5G57390	AIL5
AT5G57390	AIL5
AT1G07430	AIP1
AT2G04160	AIR3
AT3G27870	ALA8
AT1G18420	ALMT3
AT4G04955	ALN
AT1G77450	anac032
AT3G01600	anac044
AT3G04420	anac048
AT5G39820	ANAC094
AT5G64530	ANAC104
AT4G03050	AOP3
AT5G64210	AOX2
AT1G62290	APA2
AT5G67520	APK4
AT5G11160	APT5
AT3G09640	APX2
AT4G26780	AR192
AT1G28670	ARAB-1
AT3G25730	ARF14
AT2G36080	ARF31
AT3G11580	ARF32
AT3G59900	ARGOS
AT2G44080	ARL
AT3G54770	ARP1
AT1G59940	ARR3
AT1G59940	ARR3
AT2G17900	ASHR1
AT1G20140	ASK4
AT2G30970	ASP1
AT5G19550	ASP2
AT5G11520	ASP3
AT2G01340	At17.1
AT1G01240	AT1G01240
AT1G01355	AT1G01355
AT1G01453	AT1G01453
AT1G02360	AT1G02360
AT1G02380	AT1G02380
AT1G02620	AT1G02620
AT1G02700	AT1G02700
AT1G02816	AT1G02816
AT1G03070	AT1G03070
AT1G03106	AT1G03106
AT1G03210	AT1G03210
AT1G04040	AT1G04040
AT1G04330	AT1G04330
AT1G04560	AT1G04560
AT1G04645	AT1G04645
AT1G04660	AT1G04660
AT1G04660	AT1G04660
AT1G04778	AT1G04778
AT1G05340	AT1G05340
AT1G05510	AT1G05510
AT1G06360	AT1G06360
AT1G06475	AT1G06475
AT1G07473	AT1G07473
AT1G07500	AT1G07500
AT1G07690	AT1G07690
AT1G07901	AT1G07901
AT1G07985	AT1G07985
AT1G08050	AT1G08050
AT1G08170	AT1G08170
AT1G09370	AT1G09370
AT1G09500	AT1G09500
AT1G09665	AT1G09665
AT1G10522	AT1G10522
AT1G10990	AT1G10990
AT1G11170	AT1G11170
AT1G11270	AT1G11270
AT1G11300	AT1G11300
AT1G11510	AT1G11510
AT1G11655	AT1G11655
AT1G12064	AT1G12064
AT1G12130	AT1G12130
AT1G12230	AT1G12230
AT1G12340	AT1G12340
AT1G12805	AT1G12805
AT1G12805	AT1G12805
AT1G12805	AT1G12805
AT1G12830	AT1G12830
AT1G12845	AT1G12845
AT1G13670	AT1G13670
AT1G14120	AT1G14120
AT1G14930	AT1G14930
AT1G14940	AT1G14940
AT1G14950	AT1G14950
AT1G14960	AT1G14960
AT1G15150	AT1G15150
AT1G15160	AT1G15160
AT1G15180	AT1G15180
AT1G15230	AT1G15230
AT1G15825	AT1G15825
AT1G15830	AT1G15830
AT1G15840	AT1G15840
AT1G15840	AT1G15840
AT1G15840	AT1G15840
AT1G15900	AT1G15900
AT1G16770	AT1G16770
AT1G16850	AT1G16850
AT1G17010	AT1G17010
AT1G17090	AT1G17090
AT1G17100	AT1G17100
AT1G17285	AT1G17285
AT1G17285	AT1G17285
AT1G17345	AT1G17345
AT1G17430	AT1G17430
AT1G17830	AT1G17830
AT1G17860	AT1G17860
AT1G18940	AT1G18940
AT1G18980	AT1G18980
AT1G19115	AT1G19115
AT1G19410	AT1G19410
AT1G19490	AT1G19490
AT1G19530	AT1G19530
AT1G19540	AT1G19540
AT1G21000	AT1G21000
AT1G21110	AT1G21110
AT1G21940	AT1G21940
AT1G22170	AT1G22170
AT1G22270	AT1G22270
AT1G22440	AT1G22440
AT1G22470	AT1G22470
AT1G22600	AT1G22600
AT1G23000	AT1G23000
AT1G23070	AT1G23070
AT1G23100	AT1G23100
AT1G23750	AT1G23750
AT1G24360	AT1G24360
AT1G24580	AT1G24580
AT1G24580	AT1G24580
AT1G25150	AT1G25150
AT1G25180	AT1G25180
AT1G25270	AT1G25270
AT1G25422	AT1G25422
AT1G25530	AT1G25530
AT1G26400	AT1G26400
AT1G26762	AT1G26762
AT1G26800	AT1G26800
AT1G27300	AT1G27300
AT1G27350	AT1G27350
AT1G27461	AT1G27461
AT1G27990	AT1G27990
AT1G28030	AT1G28030
AT1G28135	AT1G28135
AT1G28580	AT1G28580
AT1G28640	AT1G28640
AT1G28660	AT1G28660
AT1G29090	AT1G29090
AT1G29120	AT1G29120
AT1G29250	AT1G29250
AT1G29270	AT1G29270
AT1G29680	AT1G29680
AT1G30070	AT1G30070
AT1G30515	AT1G30515
AT1G30515	AT1G30515
AT1G30750	AT1G30750
AT1G30860	AT1G30860
AT1G31335	AT1G31335
AT1G31390	AT1G31390
AT1G31400	AT1G31400
AT1G31750	AT1G31750
AT1G32375	AT1G32375
AT1G32560	AT1G32560
AT1G32710	AT1G32710
AT1G33102	AT1G33102
AT1G33490	AT1G33490
AT1G33500	AT1G33500
AT1G33700	AT1G33700
AT1G34047	AT1G34047
AT1G35190	AT1G35190
AT1G44414	AT1G44414
AT1G48660	AT1G48660
AT1G48840	AT1G48840
AT1G48990	AT1G48990
AT1G49032	AT1G49032
AT1G49110	AT1G49110
AT1G49390	AT1G49390
AT1G50060	AT1G50060
AT1G50390	AT1G50390
AT1G50650	AT1G50650
AT1G51090	AT1G51090
AT1G51405	AT1G51405
AT1G52100	AT1G52100
AT1G52670	AT1G52670
AT1G52690	AT1G52690
AT1G53887	AT1G53887
AT1G53930	AT1G53930
AT1G53950	AT1G53950
AT1G54120	AT1G54120
AT1G54740	AT1G54740
AT1G54860	AT1G54860
AT1G54870	AT1G54870
AT1G55205	AT1G55205
AT1G55760	AT1G55760
AT1G58160	AT1G58160
AT1G59865	AT1G59865
AT1G60750	AT1G60750
AT1G60830	AT1G60830
AT1G60970	AT1G60970
AT1G60970	AT1G60970
AT1G62000	AT1G62000
AT1G62080	AT1G62080
AT1G62225	AT1G62225
AT1G62410	AT1G62410
AT1G62420	AT1G62420
AT1G62500	AT1G62500
AT1G62510	AT1G62510
AT1G62580	AT1G62580
AT1G62770	AT1G62770
AT1G63730	AT1G63730
AT1G63960	AT1G63960
AT1G64065	AT1G64065
AT1G64110	AT1G64110
AT1G64110	AT1G64110
AT1G64590	AT1G64590
AT1G65090	AT1G65090
AT1G65346	AT1G65346
AT1G66060	AT1G66060
AT1G66080	AT1G66080
AT1G66250	AT1G66250
AT1G66420	AT1G66420
AT1G66780	AT1G66780
AT1G66870	AT1G66870
AT1G67330	AT1G67330
AT1G67460	AT1G67460
AT1G67600	AT1G67600
AT1G67910	AT1G67910
AT1G67920	AT1G67920
AT1G68170	AT1G68170
AT1G68250	AT1G68250
AT1G68470	AT1G68470
AT1G68500	AT1G68500
AT1G69526	AT1G69526
AT1G70000	AT1G70000
AT1G70350	AT1G70350
AT1G70800	AT1G70800
AT1G70810	AT1G70810
AT1G70985	AT1G70985
AT1G71000	AT1G71000
AT1G71015	AT1G71015
AT1G71110	AT1G71110
AT1G71470	AT1G71470
AT1G71870	AT1G71870
AT1G72070	AT1G72070
AT1G72100	AT1G72100
AT1G73120	AT1G73120
AT1G73210	AT1G73210
AT1G73340	AT1G73340
AT1G73580	AT1G73580
AT1G74300	AT1G74300
AT1G74370	AT1G74370
AT1G74460	AT1G74460
AT1G76470	AT1G76470
AT1G76590	AT1G76590
AT1G76790	AT1G76790
AT1G77145	AT1G77145
AT1G77160	AT1G77160
AT1G77330	AT1G77330
AT1G77525	AT1G77525
AT1G77530	AT1G77530
AT1G77880	AT1G77880
AT1G78070	AT1G78070
AT1G78190	AT1G78190
AT1G78260	AT1G78260
AT1G78780	AT1G78780
AT1G78922	AT1G78922
AT1G79170	AT1G79170
AT1G80240	AT1G80240
AT1G80640	AT1G80640
AT5G55370	AT2
AT2G01210	AT2G01210
AT2G01275	AT2G01275
AT2G01790	AT2G01790
AT2G02680	AT2G02680
AT2G02770	AT2G02770
AT2G04170	AT2G04170
AT2G05580	AT2G05580
AT2G07000	AT2G07000
AT2G11891	AT2G11891
AT2G12461	AT2G12461
AT2G12646	AT2G12646
AT2G14060	AT2G14060
AT2G14060	AT2G14060
AT2G14160	AT2G14160
AT2G14846	AT2G14846
AT2G16595	AT2G16595
AT2G16980	AT2G16980
AT2G18340	AT2G18340
AT2G18540	AT2G18540
AT2G19320	AT2G19320
AT2G19810	AT2G19810
AT2G20560	AT2G20560
AT2G20560	AT2G20560
AT2G20720	AT2G20720
AT2G20835	AT2G20835
AT2G20940	AT2G20940
AT2G21720	AT2G21720
AT2G21820	AT2G21820
AT2G21930	AT2G21930
AT2G22088	AT2G22088
AT2G22170	AT2G22170
AT2G22230	AT2G22230
AT2G23110	AT2G23110
AT2G23240	AT2G23240
AT2G24280	AT2G24280
AT2G24310	AT2G24310
AT2G24560	AT2G24560
AT2G24980	AT2G24980
AT2G25130	AT2G25130
AT2G25220	AT2G25220
AT2G25240	AT2G25240
AT2G25625	AT2G25625
AT2G25737	AT2G25737
AT2G25770	AT2G25770
AT2G25890	AT2G25890
AT2G27360	AT2G27360
AT2G27420	AT2G27420
AT2G28420	AT2G28420
AT2G28426	AT2G28426
AT2G28426	AT2G28426
AT2G28680	AT2G28680
AT2G28780	AT2G28780
AT2G29300	AT2G29300
AT2G30000	AT2G30000
AT2G30560	AT2G30560
AT2G30615	AT2G30615
AT2G31985	AT2G31985
AT2G32210	AT2G32210
AT2G32560	AT2G32560
AT2G33520	AT2G33520
AT2G33590	AT2G33590
AT2G34020	AT2G34020
AT2G34080	AT2G34080
AT2G34260	AT2G34260
AT2G34315	AT2G34315
AT2G34340	AT2G34340
AT2G34355	AT2G34355
AT2G34360	AT2G34360
AT2G34700	AT2G34700
AT2G34700	AT2G34700
AT2G34740	AT2G34740
AT2G34910	AT2G34910
AT2G35605	AT2G35605
AT2G36540	AT2G36540
AT2G36540	AT2G36540
AT2G37440	AT2G37440
AT2G37540	AT2G37540
AT2G37700	AT2G37700
AT2G37810	AT2G37810
AT2G38430	AT2G38430
AT2G38465	AT2G38465
AT2G38820	AT2G38820
AT2G38870	AT2G38870
AT2G39415	AT2G39415
AT2G39420	AT2G39420
AT2G39980	AT2G39980
AT2G41225	AT2G41225
AT2G42000	AT2G42000
AT2G42110	AT2G42110
AT2G42150	AT2G42150
AT2G42560	AT2G42560
AT2G42660	AT2G42660
AT2G42950	AT2G42950
AT2G42975	AT2G42975
AT2G43580	AT2G43580
AT2G43590	AT2G43590
AT2G43745	AT2G43745
AT2G43860	AT2G43860
AT2G45040	AT2G45040
AT2G45135	AT2G45135
AT2G45360	AT2G45360
AT2G45750	AT2G45750
AT2G45870	AT2G45870
AT2G45900	AT2G45900
AT2G46150	AT2G46150
AT2G46850	AT2G46850
AT2G47115	AT2G47115
AT2G47360	AT2G47360
AT2G47530	AT2G47530
AT2G47540	AT2G47540
AT2G47780	AT2G47780
AT2G48121	AT2G48121
AT2G48130	AT2G48130
AT4G27140	AT2S1
AT4G27150	AT2S2
AT4G27160	AT2S3
AT4G27170	AT2S4
AT3G01410	AT3G01410
AT3G01570	AT3G01570
AT3G01730	AT3G01730
AT3G01950	AT3G01950
AT3G03170	AT3G03170
AT3G03341	AT3G03341
AT3G03590	AT3G03590
AT3G03620	AT3G03620
AT3G03770	AT3G03770
AT3G03776	AT3G03776
AT3G04000	AT3G04000
AT3G04040	AT3G04040
AT3G05190	AT3G05190
AT3G05260	AT3G05260
AT3G05300	AT3G05300
AT3G05320	AT3G05320
AT3G05500	AT3G05500
AT3G05510	AT3G05510
AT3G05600	AT3G05600
AT3G05685	AT3G05685
AT3G05920	AT3G05920
AT3G05936	AT3G05936
AT3G05937	AT3G05937
AT3G06145	AT3G06145
AT3G06610	AT3G06610
AT3G07070	AT3G07070
AT3G07090	AT3G07090
AT3G07150	AT3G07150
AT3G07500	AT3G07500
AT3G08030	AT3G08030
AT3G09035	AT3G09035
AT3G09110	AT3G09110
AT3G09120	AT3G09120
AT3G09130	AT3G09130
AT3G09190	AT3G09190
AT3G09925	AT3G09925
AT3G10020	AT3G10020
AT3G10200	AT3G10200
AT3G10780	AT3G10780
AT3G11600	AT3G11600
AT3G11640	AT3G11640
AT3G11930	AT3G11930
AT3G12730	AT3G12730
AT3G12955	AT3G12955
AT3G12960	AT3G12960
AT3G12970	AT3G12970
AT3G13310	AT3G13310
AT3G14360	AT3G14360
AT3G14452	AT3G14452
AT3G14595	AT3G14595
AT3G14700	AT3G14700
AT3G14880	AT3G14880
AT3G15115	AT3G15115
AT3G15240	AT3G15240
AT3G15260	AT3G15260
AT3G15280	AT3G15280
AT3G15357	AT3G15357
AT3G15670	AT3G15670
AT3G15680	AT3G15680
AT3G15690	AT3G15690
AT3G15720	AT3G15720
AT3G16120	AT3G16120
AT3G16150	AT3G16150
AT3G16190	AT3G16190
AT3G16300	AT3G16300
AT3G17130	AT3G17130
AT3G17140	AT3G17140
AT3G17152	AT3G17152
AT3G17520	AT3G17520
AT3G18200	AT3G18200
AT3G18960	AT3G18960
AT3G19508	AT3G19508
AT3G19920	AT3G19920
AT3G20370	AT3G20370
AT3G20395	AT3G20395
AT3G21351	AT3G21351
AT3G22090	AT3G22090
AT3G22490	AT3G22490
AT3G22600	AT3G22600
AT3G22620	AT3G22620
AT3G23090	AT3G23090
AT3G23180	AT3G23180
AT3G23180	AT3G23180
AT3G23470	AT3G23470
AT3G23530	AT3G23530
AT3G23880	AT3G23880
AT3G24250	AT3G24250
AT3G24750	AT3G24750
AT3G25160	AT3G25160
AT3G25880	AT3G25880
AT3G26770	AT3G26770
AT3G27400	AT3G27400
AT3G28550	AT3G28550
AT3G29034	AT3G29034
AT3G29300	AT3G29300
AT3G29385	AT3G29385
AT3G29385	AT3G29385
AT3G42850	AT3G42850
AT3G42860	AT3G42860
AT3G43110	AT3G43110
AT3G43850	AT3G43850
AT3G45310	AT3G45310
AT3G48770	AT3G48770
AT3G49300	AT3G49300
AT3G49551	AT3G49551
AT3G50230	AT3G50230
AT3G50300	AT3G50300
AT3G50350	AT3G50350
AT3G50640	AT3G50640
AT3G50940	AT3G50940
AT3G51410	AT3G51410
AT3G51750	AT3G51750
AT3G52230	AT3G52230
AT3G52561	AT3G52561
AT3G52740	AT3G52740
AT3G53040	AT3G53040
AT3G53650	AT3G53650
AT3G53830	AT3G53830
AT3G54510	AT3G54510
AT3G54580	AT3G54580
AT3G54940	AT3G54940
AT3G55720	AT3G55720
AT3G56870	AT3G56870
AT3G57500	AT3G57500
AT3G58200	AT3G58200
AT3G58210	AT3G58210
AT3G58270	AT3G58270
AT3G58360	AT3G58360
AT3G58400	AT3G58400
AT3G58450	AT3G58450
AT3G58980	AT3G58980
AT3G59200	AT3G59200
AT3G59340	AT3G59340
AT3G59480	AT3G59480
AT3G59650	AT3G59650
AT3G59710	AT3G59710
AT3G60070	AT3G60070
AT3G60670	AT3G60670
AT3G61270	AT3G61270
AT3G61680	AT3G61680
AT3G62320	AT3G62320
AT3G62860	AT3G62860
AT3G63040	AT3G63040
AT3G63430	AT3G63430
AT4G00250	AT4G00250
AT4G00320	AT4G00320
AT4G00390	AT4G00390
AT4G00893	AT4G00893
AT4G01260	AT4G01260
AT4G01450	AT4G01450
AT4G01610	AT4G01610
AT4G01700	AT4G01700
AT4G02360	AT4G02360
AT4G02690	AT4G02690
AT4G03040	AT4G03040
AT4G03200	AT4G03200
AT4G03292	AT4G03292
AT4G03965	AT4G03965
AT4G04090	AT4G04090
AT4G04972	AT4G04972
AT4G08400	AT4G08400
AT4G08410	AT4G08410
AT4G08910	AT4G08910
AT4G09930	AT4G09930
AT4G09940	AT4G09940
AT4G10265	AT4G10265
AT4G11040	AT4G11040
AT4G11040	AT4G11040
AT4G11310	AT4G11310
AT4G11340	AT4G11340
AT4G11610	AT4G11610
AT4G11810	AT4G11810
AT4G12130	AT4G12130
AT4G12680	AT4G12680
AT4G13010	AT4G13010
AT4G13160	AT4G13160
AT4G13180	AT4G13180
AT4G13390	AT4G13390
AT4G14780	AT4G14780
AT4G14980	AT4G14980
AT4G15233	AT4G15233
AT4G15390	AT4G15390
AT4G15563	AT4G15563
AT4G16165	AT4G16165
AT4G16215	AT4G16215
AT4G16220	AT4G16220
AT4G16230	AT4G16230
AT4G16620	AT4G16620
AT4G17790	AT4G17790
AT4G17810	AT4G17810
AT4G17840	AT4G17840
AT4G18650	AT4G18650
AT4G18660	AT4G18660
AT4G18680	AT4G18680
AT4G18690	AT4G18690
AT4G18920	AT4G18920
AT4G19390	AT4G19390
AT4G20040	AT4G20040
AT4G20690	AT4G20690
AT4G20820	AT4G20820
AT4G20860	AT4G20860
AT4G21020	AT4G21020
AT4G21902	AT4G21902
AT4G22217	AT4G22217
AT4G22230	AT4G22230
AT4G22235	AT4G22235
AT4G22460	AT4G22460
AT4G22666	AT4G22666
AT4G23050	AT4G23050
AT4G23493	AT4G23493
AT4G23590	AT4G23590
AT4G24110	AT4G24110
AT4G24110	AT4G24110
AT4G24420	AT4G24420
AT4G25070	AT4G25070
AT4G25170	AT4G25170
AT4G25260	AT4G25260
AT4G25580	AT4G25580
AT4G25790	AT4G25790
AT4G27250	AT4G27250
AT4G27450	AT4G27450
AT4G27530	AT4G27530
AT4G28005	AT4G28005
AT4G28840	AT4G28840
AT4G29270	AT4G29270
AT4G29690	AT4G29690
AT4G29760	AT4G29760
AT4G29770	AT4G29770
AT4G30320	AT4G30320
AT4G30670	AT4G30670
AT4G30880	AT4G30880
AT4G31320	AT4G31320
AT4G31330	AT4G31330
AT4G31360	AT4G31360
AT4G31441	AT4G31441
AT4G31441	AT4G31441
AT4G32208	AT4G32208
AT4G32290	AT4G32290
AT4G32380	AT4G32380
AT4G32605	AT4G32605
AT4G32870	AT4G32870
AT4G33145	AT4G33145
AT4G33467	AT4G33467
AT4G33610	AT4G33610
AT4G33660	AT4G33660
AT4G33730	AT4G33730
AT4G33820	AT4G33820
AT4G33820	AT4G33820
AT4G34419	AT4G34419
AT4G34600	AT4G34600
AT4G34790	AT4G34790
AT4G34810	AT4G34810
AT4G35160	AT4G35160
AT4G35200	AT4G35200
AT4G36280	AT4G36280
AT4G36600	AT4G36600
AT4G36610	AT4G36610
AT4G36700	AT4G36700
AT4G37095	AT4G37095
AT4G37095	AT4G37095
AT4G37220	AT4G37220
AT4G37420	AT4G37420
AT4G38290	AT4G38290
AT4G38810	AT4G38810
AT4G39130	AT4G39130
AT4G39675	AT4G39675
AT5G01075	AT5G01075
AT5G01300	AT5G01300
AT5G01520	AT5G01520
AT5G01650	AT5G01650
AT5G01670	AT5G01670
AT5G02220	AT5G02220
AT5G02350	AT5G02350
AT5G02580	AT5G02580
AT5G02580	AT5G02580
AT5G02760	AT5G02760
AT5G03180	AT5G03180
AT5G03580	AT5G03580
AT5G03590	AT5G03590
AT5G03700	AT5G03700
AT5G03795	AT5G03795
AT5G03795	AT5G03795
AT5G04000	AT5G04000
AT5G04380	AT5G04380
AT5G04500	AT5G04500
AT5G05220	AT5G05220
AT5G05320	AT5G05320
AT5G05430	AT5G05430
AT5G05500	AT5G05500
AT5G05640	AT5G05640
AT5G05965	AT5G05965
AT5G06250	AT5G06250
AT5G06330	AT5G06330
AT5G06330	AT5G06330
AT5G06630	AT5G06630
AT5G06640	AT5G06640
AT5G06755	AT5G06755
AT5G06990	AT5G06990
AT5G07330	AT5G07330
AT5G07360	AT5G07360
AT5G08240	AT5G08240
AT5G08360	AT5G08360
AT5G09240	AT5G09240
AT5G09480	AT5G09480
AT5G09570	AT5G09570
AT5G10160	AT5G10160
AT5G10580	AT5G10580
AT5G10695	AT5G10695
AT5G10890	AT5G10890
AT5G11340	AT5G11340
AT5G11680	AT5G11680
AT5G12110	AT5G12110
AT5G12360	AT5G12360
AT5G13200	AT5G13200
AT5G13360	AT5G13360
AT5G13370	AT5G13370
AT5G14020	AT5G14020
AT5G14450	AT5G14450
AT5G14690	AT5G14690
AT5G14860	AT5G14860
AT5G15360	AT5G15360
AT5G16350	AT5G16350
AT5G16460	AT5G16460
AT5G16980	AT5G16980
AT5G17390	AT5G17390
AT5G17700	AT5G17700
AT5G17840	AT5G17840
AT5G17960	AT5G17960
AT5G18065	AT5G18065
AT5G18130	AT5G18130
AT5G18790	AT5G18790
AT5G19800	AT5G19800
AT5G20180	AT5G20180
AT5G20400	AT5G20400
AT5G20550	AT5G20550
AT5G21020	AT5G21020
AT5G21280	AT5G21280
AT5G21280	AT5G21280
AT5G22460	AT5G22460
AT5G22545	AT5G22545
AT5G22810	AT5G22810
AT5G22820	AT5G22820
AT5G23180	AT5G23180
AT5G23480	AT5G23480
AT5G23535	AT5G23535
AT5G24130	AT5G24130
AT5G24313	AT5G24313
AT5G24970	AT5G24970
AT5G24990	AT5G24990
AT5G25020	AT5G25020
AT5G26010	AT5G26010
AT5G26260	AT5G26260
AT5G26270	AT5G26270
AT5G26280	AT5G26280
AT5G26290	AT5G26290
AT5G26790	AT5G26790
AT5G27410	AT5G27410
AT5G28910	AT5G28910
AT5G35190	AT5G35190
AT5G35320	AT5G35320
AT5G35375	AT5G35375
AT5G35660	AT5G35660
AT5G35960	AT5G35960
AT5G36100	AT5G36100
AT5G36130	AT5G36130
AT5G36710	AT5G36710
AT5G36960	AT5G36960
AT5G37140	AT5G37140
AT5G37320	AT5G37320
AT5G37340	AT5G37340
AT5G37990	AT5G37990
AT5G38020	AT5G38020
AT5G38195	AT5G38195
AT5G38200	AT5G38200
AT5G38310	AT5G38310
AT5G38565	AT5G38565
AT5G38780	AT5G38780
AT5G39080	AT5G39080
AT5G39520	AT5G39520
AT5G39970	AT5G39970
AT5G40030	AT5G40030
AT5G40382	AT5G40382
AT5G40510	AT5G40510
AT5G40860	AT5G40860
AT5G42110	AT5G42110
AT5G42250	AT5G42250
AT5G42290	AT5G42290
AT5G42690	AT5G42690
AT5G42700	AT5G42700
AT5G42785	AT5G42785
AT5G42825	AT5G42825
AT5G43060	AT5G43060
AT5G43240	AT5G43240
AT5G43570	AT5G43570
AT5G43580	AT5G43580
AT5G43770	AT5G43770
AT5G44306	AT5G44306
AT5G44310	AT5G44310
AT5G44360	AT5G44360
AT5G44360	AT5G44360
AT5G44380	AT5G44380
AT5G44440	AT5G44440
AT5G45095	AT5G45095
AT5G45310	AT5G45310
AT5G45630	AT5G45630
AT5G45650	AT5G45650
AT5G45690	AT5G45690
AT5G45920	AT5G45920
AT5G46871	AT5G46871
AT5G47170	AT5G47170
AT5G47440	AT5G47440
AT5G47440	AT5G47440
AT5G47830	AT5G47830
AT5G47950	AT5G47950
AT5G48110	AT5G48110
AT5G48350	AT5G48350
AT5G48480	AT5G48480
AT5G48490	AT5G48490
AT5G48510	AT5G48510
AT5G48890	AT5G48890
AT5G49665	AT5G49665
AT5G49665	AT5G49665
AT5G50070	AT5G50070
AT5G50170	AT5G50170
AT5G50270	AT5G50270
AT5G50360	AT5G50360
AT5G50760	AT5G50760
AT5G52420	AT5G52420
AT5G52547	AT5G52547
AT5G53260	AT5G53260
AT5G53270	AT5G53270
AT5G53895	AT5G53895
AT5G53970	AT5G53970
AT5G54000	AT5G54000
AT5G54040	AT5G54040
AT5G54165	AT5G54165
AT5G54165	AT5G54165
AT5G54300	AT5G54300
AT5G54300	AT5G54300
AT5G55050	AT5G55050
AT5G55135	AT5G55135
AT5G55410	AT5G55410
AT5G55410	AT5G55410
AT5G55430	AT5G55430
AT5G55440	AT5G55440
AT5G55620	AT5G55620
AT5G55750	AT5G55750
AT5G56060	AT5G56060
AT5G56075	AT5G56075
AT5G56100	AT5G56100
AT5G56260	AT5G56260
AT5G56700	AT5G56700
AT5G57625	AT5G57625
AT5G57760	AT5G57760
AT5G57790	AT5G57790
AT5G57820	AT5G57820
AT5G58110	AT5G58110
AT5G58160	AT5G58160
AT5G58750	AT5G58750
AT5G58750	AT5G58750
AT5G58900	AT5G58900
AT5G59130	AT5G59130
AT5G59170	AT5G59170
AT5G60060	AT5G60060
AT5G60460	AT5G60460
AT5G60610	AT5G60610
AT5G60760	AT5G60760
AT5G61412	AT5G61412
AT5G61490	AT5G61490
AT5G61610	AT5G61610
AT5G62170	AT5G62170
AT5G62280	AT5G62280
AT5G62400	AT5G62400
AT5G62400	AT5G62400
AT5G62800	AT5G62800
AT5G62800	AT5G62800
AT5G63085	AT5G63085
AT5G63190	AT5G63190
AT5G63270	AT5G63270
AT5G63350	AT5G63350
AT5G63500	AT5G63500
AT5G64080	AT5G64080
AT5G65530	AT5G65530
AT5G66260	AT5G66260
AT5G66430	AT5G66430
AT5G66580	AT5G66580
AT5G66780	AT5G66780
AT5G66815	AT5G66815
AT5G66985	AT5G66985
AT5G67390	AT5G67390
AT3G47750	ATATH3
AT1G07645	ATDSI-1VOC
AT3G22500	ATECP31
AT2G36640	ATECP63
AT3G09520	ATEXO70H4
AT3G06420	ATG8H
AT2G01430	ATHB-17
AT3G01220	ATHB-20
AT3G54590	ATHRGP1
AT4G15975	ATL17
AT1G74410	ATL24
AT4G28890	ATL42
AT2G27940	ATL57
AT5G07040	ATL69
AT4G10150	ATL7
AT1G18250	ATLP-1
AT3G27820	ATMDAR4
AT2G31180	ATMYB14
AT5G14340	AtMYB40
AT3G48920	AtMYB45
AT1G16490	ATMYB58
AT4G04030	ATOFP9
AT1G03120	ATRAB28
AT3G17611	ATRBL14
AT2G29540	ATRPC14
AT5G07190	ATS3
AT5G42890	ATSCP2
AT2G43520	ATTI2
AT2G43535	ATTI4
AT1G47540	ATTI7
AT5G58070	ATTIL
AT3G28150	AXY4L
AT5G67450	AZF1
AT5G43170	AZF3
AT5G50300	AZG2
AT4G12470	AZI1
AT5G62100	BAG2
AT1G12060	BAG5
AT2G46240	BAG6
AT5G47980	BAHD1
AT1G50110	BCAT6
AT5G16390	BCCP1
AT5G15530	BCCP2
AT5G52570	BETA-OHASE 2
AT5G63810	BGAL10
AT3G21370	BGLU19
AT3G09260	BGLU23
AT2G44470	BGLU29
AT4G22100	BGLU3
AT1G60090	BGLU4
AT3G56770	BHLH107
AT1G68240	BHLH109
AT1G68240	BHLH109
AT3G19500	BHLH113
AT3G22100	BHLH117
AT1G62975	BHLH125
AT2G43140	BHLH129
AT2G42280	BHLH130
AT4G28790	BHLH23
AT4G29930	BHLH27
AT5G51780	BHLH36
AT2G40200	BHLH51
AT1G27740	BHLH54
AT4G28800	BHLH56
AT4G34530	BHLH63
AT5G46690	BHLH71
AT5G58010	BHLH82
AT1G66470	BHLH83
AT3G21330	BHLH87
AT2G43360	BIO2
AT1G75430	BLH11
AT5G53400	BOB1
AT3G62270	BOR2
AT1G68120	BPC3
AT1G03457	BRN2
AT5G67480	BT4
AT1G62710	bVPE
AT1G02640	BXL2
AT1G72680	CAD1
AT2G36100	CASP1
AT3G11550	CASP2
AT5G15290	CASP5
AT4G35090	CAT2
AT1G69800	CBSCBS2
AT2G36500	CBSCBSPB2
AT2G14520	CBSDUF3
AT4G27460	CBSX5
AT2G44990	CCD7
AT3G53230	CDC48D
AT2G38620	CDKB1-2
AT3G48340	CEP2
AT5G01680	CHX26
AT3G14450	CID9
AT4G25990	CIL
AT3G23340	ckl10
AT3G27170	CLC-B
AT5G43860	CLH2
AT1G74310	CLPB1
AT2G25140	CLPB4
AT5G39930	CLPS5
AT4G04870	CLS
AT3G22930	CML11
AT3G07490	CML3
AT5G44460	CML43
AT2G46450	CNGC12
AT2G24610	CNGC14
AT1G09790	COBL6
AT5G49270	COBL9
AT3G46900	COPT2
AT4G36880	CP1
AT1G14980	CPN10
AT1G03880	CRB
AT1G03890	CRD
AT4G11140	CRF1
AT4G21410	CRK29
AT1G63600	CRRSP4
AT4G15290	CSLB5
AT4G23990	CSLG3
AT2G42790	CSY3
AT2G42790	CSY3
AT1G02980	CUL2
AT3G13790	CWINV1
AT3G48700	CXE13
AT1G49660	CXE5
AT3G11520	CYCB1-3
AT2G45080	CYCU2-1
AT5G07450	CYCU4-2
AT1G01940	CYP18-1
AT4G15396	CYP702A6
AT2G45510	CYP704A2
AT2G14100	CYP705A13
AT3G20110	CYP705A20
AT5G47990	CYP705A5
AT2G27000	CYP705A8
AT2G27010	CYP705A9
AT2G29090	CYP707A2
AT5G48000	CYP708A2
AT2G46950	CYP709B2
AT5G36140	CYP716A2
AT2G42850	CYP718
AT3G48270	CYP71A26
AT5G57260	CYP71B10
AT5G25180	CYP71B14
AT1G13080	CYP71B2
AT3G26290	CYP71B26
AT3G14610	CYP72A7
AT3G14630	CYP72A9
AT3G61040	CYP76C7
AT1G13710	CYP78A5
AT3G61880	CYP78A9
AT3G28740	CYP81D11
AT5G57220	CYP81F2
AT4G37400	CYP81F3
AT4G37410	CYP81F4
AT2G25160	CYP82F1
AT5G23190	CYP86B1
AT1G12740	CYP87A2
AT5G63450	CYP94B1
AT4G39500	CYP96A11
AT1G65340	CYP96A3
AT1G47620	CYP96A8
AT3G12490	CYS6
AT5G46180	DELTA-OAT
AT4G29330	DER1
AT5G40610	DHAPRD
AT5G48950	DHNAT2
AT5G42510	DIR1
AT4G11190	DIR13
AT4G11210	DIR14
AT3G55230	DIR24
AT3G50410	DOF3.4
AT5G66940	DOF5.8
AT3G44460	DPBF2
AT2G41070	DPBF4
AT1G75490	DREB2D
AT2G38340	DREB2E
AT5G18450	DREB2G
AT1G72660	DRG2
AT5G15380	DRM1
AT2G04040	DTX1
AT2G04040	DTX1
AT2G04040	DTX1
AT2G04100	DTXL5
AT5G45380	DUR3
AT3G14362	DVL19
AT3G14362	DVL19
AT5G64720	EC1.5
AT4G16210	ECHIA
AT2G48140	EDA4
AT4G30380	EGC1
AT5G10120	EIL4
AT5G65100	EIL5
AT2G40080	ELF4
AT3G22840	ELIP1
AT4G14690	ELIP2
AT3G51810	EM1
AT2G40170	EM6
AT3G12670	emb2742
AT1G34430	EMB3003
AT4G21600	ENDO5
AT5G05460	ENGASE1
AT1G74030	ENO1
AT5G53870	ENODL1
AT5G25090	ENODL13
AT2G25060	ENODL14
AT3G01070	ENODL16
AT1G08500	ENODL18
AT4G28365	ENODL3
AT4G05110	ENT6
AT1G80133	EPFL8
AT2G27380	EPR1
AT3G08970	ERDJ3A
AT5G25190	ERF003
AT1G01250	ERF023
AT2G47520	ERF071
AT2G33710	ERF112
AT5G13330	ERF113
AT2G31230	ERF15
AT1G12980	ESR1
AT1G01380	ETC1
AT3G45960	EXLA3
AT1G69530	EXPA1
AT1G26770	EXPA10
AT2G03090	EXPA15
AT1G62980	EXPA18
AT5G05290	EXPA2
AT4G38210	EXPA20
AT2G37640	EXPA3
AT3G29030	EXPA5
AT1G12560	EXPA7
AT5G02260	EXPA9
AT2G20750	EXPB1
AT2G20750	EXPB1
AT1G21310	EXT3
AT2G43710	FAB2
AT2G29980	FAD3
AT4G34520	FAE1
AT1G03990	FAO1
AT1G53520	FAP3
AT3G25110	FATA
AT4G13050	FATA2
AT4G33160	FBX13
AT1G10960	FD1
AT5G10000	FD4
AT3G11050	FER2
AT3G09350	Fes1A
AT1G26870	FEZ
AT5G48360	FH9
AT2G06005	FIP1
AT5G05420	FKBP15-3
AT5G48570	FKBP65
AT2G20520	FLA6
AT1G62570	FMOGS-OX4
AT3G21730	FOLB3
AT3G08040	FRD3
AT4G25100	FSD1
AT3G26790	FUS3
AT3G26790	FUS3
AT2G15370	FUT5
AT1G09420	G6PD4
AT5G51810	GA20OX2
AT5G07200	GA20OX3
AT1G47990	GA2OX4
AT1G80340	GA3OX2
AT5G17330	GAD1
AT3G10185	GASA13
AT4G09610	GASA2
AT4G09600	GASA3
AT1G74670	GASA6
AT3G50870	GATA18
AT4G36620	GATA19
AT2G45050	GATA2
AT4G26150	GATA22
AT2G20770	GCL2
AT1G52920	GCR2
AT5G08030	GDPD6
AT5G55490	GEX1
AT4G01900	GLB1
AT1G53920	GLIP5
AT1G54000	GLL22
AT1G54010	GLL23
AT5G37600	GLN1-1
AT5G16570	GLN1-4
AT1G48470	GLN1-5
AT3G14130	GLO4
AT2G32390	GLR3.5
AT5G66280	GMD1
AT2G47180	GOLS1
AT2G47180	GOLS1
AT5G30500	GOLS10
AT1G56600	GOLS2
AT1G02390	GPAT2
AT1G61800	GPT2
AT5G53660	GRF7
AT5G63030	GRXC1
AT2G47880	GRXC13
AT3G62960	GRXC14
AT1G03850	GRXS13
AT4G20140	GSO1
AT2G02930	GSTF3
AT2G29490	GSTU1
AT1G27140	GSTU14
AT2G29480	GSTU2
AT1G78340	GSTU22
AT1G17170	GSTU24
AT1G17170	GSTU24
AT1G17180	GSTU25
AT2G29460	GSTU4
AT2G29420	GSTU7
AT3G09270	GSTU8
AT5G62480	GSTU9
AT2G46740	GULLO5
AT4G09990	GXM2
AT1G33800	GXM3
AT2G29380	HAI3
AT3G44490	HDA17
AT5G46880	HDG5
AT5G67060	HEC1
AT3G50330	HEC2
AT5G41040	HHT1
AT5G66110	HIPP27
AT4G37580	HLS1
AT3G51880	HMGB1
AT1G55650	HMGB11
AT1G04880	HMGB15
AT1G76110	HMGB9
AT3G22740	HMT3
AT2G43910	HOL1
AT4G12400	HOP3
AT4G12400	HOP3
AT4G36830	HOS3
AT4G21320	HSA32
AT4G21320	HSA32
AT5G50600	HSD1
AT5G50700	HSD1
AT4G10020	HSD5
AT5G50770	HSD6
AT3G02990	HSFA1E
AT2G26150	HSFA2
AT3G51910	HSFA7A
AT3G63350	HSFA7B
AT3G63350	HSFA7B
AT5G54070	HSFA9
AT4G21870	HSP15.4
AT5G37670	HSP15.7
AT5G37670	HSP15.7
AT3G46230	HSP17.4A
AT1G54050	HSP17.4B
AT5G12020	HSP17.6
AT1G59860	HSP17.6A
AT2G29500	HSP17.6B
AT2G29500	HSP17.6B
AT1G53540	HSP17.6C
AT5G12030	HSP17.7
AT1G07400	HSP17.8
AT5G59720	HSP18.1
AT4G10250	HSP22.0
AT5G51440	HSP23.5
AT4G25200	HSP23.6
AT4G27670	HSP25.3
AT1G52560	HSP26.5
AT1G52560	HSP26.5
AT1G16030	HSP70-5
AT1G16030	HSP70-5
AT2G32120	HSP70-8
AT2G32120	HSP70-8
AT5G52640	HSP81-1
AT2G38810	HTA8
AT1G01370	HTR12
AT5G62490	HVA22B
AT1G47840	HXK3
AT3G17609	HYH
AT2G46990	IAA20
AT2G01200	IAA32
AT5G57420	IAA33
AT5G55250	IAMT1
AT3G21720	ICL
AT3G21720	ICL
AT5G15860	ICME
AT3G02410	ICMEL2
AT3G02410	ICMEL2
AT1G74710	ICS1
AT1G14580	IDD6
AT1G54840	IDM2
AT3G18485	ILR2
AT1G22650	INVD
AT4G39800	IPS1
AT2G22240	IPS2
AT5G04120	IPSP
AT1G72670	iqd8
AT4G19680	IRT2
AT1G68480	JAG
AT2G25980	JAL20
AT3G16450	JAL33
AT3G16460	JAL34
AT3G21380	JAL36
AT1G33790	JAL4
AT5G49850	JAL46
AT5G46290	KAS1
AT4G32650	KAT3
AT4G34250	KCS16
AT5G09250	KIWI
AT1G65610	KOR2
AT3G19150	KRP6
AT3G09220	LAC7
AT5G01040	LAC8
AT5G01050	LAC9
AT5G27600	LACS7
AT5G66100	LARP1B
AT2G21050	LAX2
AT2G30130	LBD12
AT2G30340	LBD13
AT2G42430	LBD16
AT4G00210	LBD31
AT1G67100	LBD40
AT1G67100	LBD40
AT1G68510	LBD42
AT1G68510	LBD42
AT3G03310	LCAT3
AT4G30064	LCR61
AT2G21490	LEA
AT1G01470	LEA14
AT2G35300	LEA18
AT5G06760	LEA4-5
AT1G28300	LEC2
AT3G59730	LECRK56
AT5G13910	LEP
AT1G01060	LHY
AT5G14180	LIP2
AT5G14180	LIP2
AT2G37210	LOG3
AT3G53450	LOG4
AT3G16950	LPD1
AT4G16155	LPD2
AT1G25210	LPXC1
AT1G12040	LRX1
AT1G62440	LRX2
AT3G25860	LTA2
AT5G52300	LTI65
AT2G38530	LTP2
AT5G59320	LTP3
AT5G03200	LUL1
AT2G41280	M10
AT2G41260	M17
AT5G65080	MAF5
AT2G37380	MAKR3
AT1G07150	MAPKKK13
AT5G67080	MAPKKK19
AT3G50310	MAPKKK20
AT5G52230	MBD13
AT3G24500	MBF1C
AT1G37140	MCT1
AT4G25630	MED36A
AT3G12580	MED37C
AT3G12580	MED37C
AT4G10560	MEE53
AT1G25310	MEE8
AT1G25310	MEE8
AT2G23620	MES1
AT1G69240	MES15
AT3G06860	MFP2
AT1G18100	MFT
AT1G64660	MGL
AT1G03840	MGP
AT2G19800	MIOX2
AT2G41660	MIZ1
AT2G44110	MLO15
AT1G70840	MLP31
AT5G03860	MLS
AT5G03860	MLS
AT2G05990	MOD1
AT2G03720	MRH6
AT3G56350	MSD2
AT5G19520	MSL9
AT4G21860	MSRB2
AT4G04840	MSRB6
AT3G58060	MTPC3
AT5G60890	MYB34
AT1G68320	MYB62
AT1G56650	MYB75
AT1G66390	MYB90
AT1G01720	NAC002
AT5G22290	NAC089
AT3G44290	NAC60
AT2G19900	NADP-ME1
AT2G22770	NAI1
AT3G15950	NAI2
AT5G04370	NAMT1
AT5G49990	NAT5
AT1G78390	NCED9
AT4G21490	NDB3
AT2G20800	NDB4
AT1G03470	NET3A
AT2G20585	NFD6
AT3G05690	NFYA2
AT1G72830	NFYA3
AT3G14020	NFYA6
AT1G30500	NFYA7
AT5G47670	NFYB6
AT1G21970	NFYB9
AT1G56170	NFYC2
AT3G11650	NHL2
AT4G09590	NHL22
AT5G55470	NHX4
AT5G23230	NIC2
AT5G23220	NIC3
AT4G19030	NIP1-1
AT5G22300	NIT4
AT2G43500	NLP8
AT3G59580	NLP9
AT2G20490	NOP10
AT3G45700	NPF2.4
AT3G45710	NPF2.5
AT4G21680	NPF7.2
AT2G02040	NPF8.3
AT4G26120	NPR2
AT1G15960	NRAMP6
AT1G53690	NRPB12L
AT5G57980	NRPB5L1
AT5G57980	NRPB5L1
AT1G54250	NRPB8A
AT2G41340	NRPD5B
AT2G41340	NRPD5B
AT3G57080	NRPE5A
AT3G54490	NRPE5C
AT5G60770	NRT2.4
AT1G12940	NRT2.5
AT5G14570	NRT2.7
AT5G14570	NRT2.7
AT5G04010	NSFBX
AT3G16400	NSP1
AT2G33070	NSP2
AT2G27300	NTL8
AT3G14590	NTMC2T6.2
AT3G18610	NUCL2
AT1G14860	NUDT18
AT1G79690	NUDT3
AT4G16160	OEP162
AT1G79960	OFP14
AT5G51210	OL3
AT5G51210	OL3
AT3G61990	OMTF3
AT1G76680	OPR1
AT1G76690	OPR2
AT4G27730	OPT6
AT1G66040	ORTH4
AT5G16970	P1
AT1G71770	PAB5
AT3G07130	PAP15
AT3G52780	PAP20
AT2G01890	PAP8
AT3G22640	PAP85
AT5G22470	PARP3
AT1G22530	PATL2
AT3G16420	PBP1
AT3G16430	PBP2
AT5G44610	PCAP2
AT4G37870	PCKA
AT3G14330	PCMP-H57
AT5G15120	PCO1
AT5G39890	PCO2
AT5G39890	PCO2
AT1G68630	PCR12
AT3G44830	PDAT2
AT4G33070	PDC1
AT1G75830	PDF1.1
AT2G02130	PDF2.3
AT1G01090	PDH-E1 ALPHA
AT1G30120	PDH-E1 BETA
AT2G38230	PDX11
AT3G16050	PDX12
AT2G38210	PDX1L4
AT2G38210	PDX1L4
AT2G33150	PED1
AT5G07500	PEI1
AT5G36150	PEN3
AT1G78500	PEN6
AT1G48130	PER1
AT1G05250	PER1
AT1G77100	PER13
AT2G18980	PER16
AT2G24800	PER18
AT2G34060	PER19
AT3G49960	PER35
AT1G14540	PER4
AT4G25980	PER43
AT4G26010	PER44
AT4G31760	PER46
AT5G17820	PER57
AT5G22410	PER60
AT5G39580	PER62
AT5G64100	PER69
AT1G30870	PER7
AT5G67400	PER73
AT1G34510	PER8
AT1G70460	PERK13
AT3G61070	PEX11E
AT3G03490	PEX19-1
AT5G17550	PEX19-2
AT5G47810	PFK2
AT1G09570	PHYA
AT2G20180	PIF1
AT1G13230	PII-2
AT5G50240	PIMT2
AT5G57090	PIN2
AT1G77110	PIN6
AT2G16850	PIP2-8
AT2G26420	PIP5K3
AT4G26050	PIRL8
AT5G52920	PKP2
AT4G16820	PLA-I{beta]2
AT3G20840	PLT1
AT1G51190	PLT2
AT2G22780	PMDH1
AT1G11580	PME18
AT3G10710	PME24
AT3G60730	PME36
AT5G04960	PME46
AT5G54190	PORA
AT1G56240	PP2B13
AT1G09155	PP2B15
AT3G14940	PPC3
AT4G15530	PPDK
AT5G13800	PPH
AT3G15340	PPI2
AT5G39860	PRE1
AT1G74500	PRE3
AT3G59220	PRN1
AT1G54970	PRP1
AT3G62680	PRP3
AT4G13660	PRR2
AT3G52960	PRXIIE
AT1G13590	PSK1
AT5G58650	PSY1
AT3G52450	PUB22
AT1G56040	PUB58
AT4G18210	PUP10
AT5G41160	PUP12
AT1G15330	PV42A
AT5G55240	PXG2
AT1G08590	PXL1
AT5G45860	PYL11
AT5G45870	PYL12
AT4G18620	PYL13
AT2G26040	PYL2
AT2G38310	PYL4
AT5G05440	PYL5
AT4G17870	PYR1
AT5G25450	QCR7-2
AT5G66400	RAB18
AT4G18430	RABA1E
AT4G39890	RABH1C
AT1G02900	RALF1
AT2G33130	RALFL18
AT3G29780	RALFL27
AT1G46768	RAP2-1
AT4G36900	RAP2-10
AT5G19790	RAP2-11
AT1G43160	RAP2-6
AT4G06746	RAP2-9
AT3G23830	RBG4
AT5G51060	RBOHC
AT1G49600	RBP47A
AT3G24240	RCH2
AT3G05890	RCI2B
AT2G19930	RDR5
AT4G33280	REM16
AT4G33280	REM16
AT1G26680	REM17
AT4G31615	REM2
AT4G31660	REM7
AT4G31680	REM8
AT1G55740	RFS1
AT4G01970	RFS4
AT5G20250	RFS6
AT1G13620	RGF2
AT3G30350	RGF4
AT5G17490	RGL3
AT1G56550	RGXT3
AT4G02270	RHS13
AT4G29180	RHS16
AT1G16440	RHS3
AT5G44280	RING1A
AT1G03770	RING1B
AT5G66990	RKD3
AT4G35590	RKD5
AT2G21650	RL2
AT3G15820	ROD1
AT1G08340	ROPGAP5
AT5G22440	RPL10AC
AT2G42740	RPL11A
AT5G45775	RPL11B
AT3G07110	RPL13AA
AT3G49010	RPL13B
AT1G27400	RPL17A
AT3G05560	RPL22B
AT3G22230	RPL27B
AT3G06700	RPL29A
AT1G77940	RPL30B
AT3G53740	RPL36B
AT1G52300	RPL37B
AT3G16080	RPL37C
AT4G31985	RPL39C
AT2G18020	RPL8A
AT5G47700	RPP1C
AT2G27720	RPP2A
AT3G44590	RPP2D
AT5G40040	RPP2E
AT4G25890	RPP3A
AT4G30800	RPS11B
AT1G15930	RPS12A
AT3G60770	RPS13A
AT4G00100	RPS13B
AT5G09510	RPS15D
AT5G43640	RPS15E
AT5G63070	RPS15F
AT3G02080	RPS19A
AT3G47370	RPS20B
AT3G09680	RPS23A
AT2G21580	RPS25B
AT3G56340	RPS26C
AT1G23410	RPS27AA
AT3G62250	RPS27AC
AT1G58684	RPS2B
AT1G59359	RPS2B
AT3G57490	RPS2D
AT4G29390	RPS30C
AT5G58420	RPS4D
AT2G37270	RPS5A
AT4G31700	RPS6A
AT5G20290	RPS8A
AT5G59240	RPS8B
AT5G15200	RPS9B
AT3G04770	RPSAB
AT1G12950	RSH2
AT5G16023	RTFL18
AT1G64585	RTFL22
AT2G39705	RTFL8
AT2G23640	RTNLB13
AT5G23730	RUP2
AT1G01520	RVE3
AT5G16240	S-ACP-DES1
AT1G43800	S-ACP-DES6
AT5G35770	SAP
AT4G25380	SAP10
AT2G27580	SAP3
AT2G45210	SAUR36
AT3G23800	SBP3
AT5G67411	SCL16
AT5G36180	SCPL1
AT3G12203	SCPL17
AT5G09640	SCPL19
AT2G35770	SCPL28
AT1G73280	SCPL3
AT1G43780	SCPL44
AT3G10450	SCPL7
AT2G23010	SCPL9
AT4G15735	SCRL10
AT4G22105	SCRL26
AT1G60983	SCRL8
AT2G25150	SCT
AT5G65165	SDH2-3
AT3G50090	SDN4
AT2G47130	SDR3A
AT2G47140	SDR3B
AT2G47120	SDR3C
AT3G29250	SDR4
AT2G23510	SDT
AT2G23510	SDT
AT5G54740	SESA5
AT5G01340	SFC1
AT4G34580	SFH1
AT5G27360	SFP2
AT4G22920	SGR1
AT4G11910	SGR2
AT5G02750	SGR9
AT5G24120	SIGE
AT5G02020	SIS
AT5G57900	SKIP1
AT5G66920	sks17
AT1G79580	SMB
AT3G54990	SMZ
AT3G10400	SNRNP31
AT5G08150	SOB5
AT1G03790	SOM
AT5G07000	SOT14
AT3G45070	SOT5
AT3G45080	SOT6
AT1G13420	SOT8
AT2G37970	SOUL-1
AT5G24140	SQE4
AT1G17020	SRG1
AT1G78290	SRK2C
AT2G41290	SSL2
AT3G57010	SSL8
AT3G57020	SSL9
AT3G19930	STP4
AT4G35770	STR15
AT2G17850	STR17
AT5G66170	STR18
AT1G67810	SUFE2
AT4G02700	SULTR3
AT5G49190	SUS2
AT4G02280	SUS3
AT5G62850	SWEET5
AT1G66770	SWEET6
AT3G12060	TBL1
AT5G15890	TBL21
AT3G16990	TENA_E
AT5G57810	TET15
AT5G60220	TET4
AT5G06839	TGA10
AT1G08320	TGA9
AT1G08630	THA1
AT5G48010	THAS1
AT1G14530	THH1
AT1G48500	TIFY6A
AT1G48500	TIFY6A
AT3G17860	TIFY6B
AT1G61570	TIM13
AT5G25810	TINY
AT1G73190	TIP3-1
AT2G25810	TIP4-1
AT2G45290	TKL-2
AT5G60120	TOE2
AT1G64220	TOM7-2
AT1G64220	TOM7-2
AT1G04070	TOM9-1
AT2G23230	TPS05
AT1G33750	TPS22
AT3G25820	TPS27
AT4G27070	TSB2
AT5G38530	TSBtype2
AT5G38530	TSBtype2
AT2G47770	TSPO
AT3G14950	TTL2
AT1G75780	TUBB1
AT5G43630	TZP
AT3G08690	UBC11
AT1G50490	UBC20
AT2G32300	UCC1
AT3G60280	UCC3
AT1G63180	UGE3
AT4G10960	UGE5
AT5G17310	UGP2
AT3G21800	UGT71B8
AT3G21800	UGT71B8
AT2G29750	UGT71C1
AT2G29740	UGT71C2
AT1G01390	UGT72B2
AT2G18570	UGT72D1
AT5G66690	UGT72E2
AT4G34135	UGT73B2
AT4G34131	UGT73B3
AT2G15490	UGT73B4
AT2G36780	UGT73C3
AT2G36770	UGT73C4
AT2G36800	UGT73C5
AT2G31750	UGT74D1
AT1G05680	UGT74E2
AT4G15550	UGT75D1
AT5G05880	UGT76C4
AT5G05890	UGT76C5
AT3G46660	UGT76E12
AT5G59590	UGT76E2
AT3G46700	UGT76E3
AT5G17040	UGT78D4
AT3G21560	UGT84A2
AT1G22400	UGT85A1
AT1G22360	UGT85A2
AT2G16890	UGT90A1
AT1G10400	UGT90A2
AT2G22590	UGT91A1
AT5G65550	UGT91B1
AT5G49690	UGT91C1
AT5G49690	UGT91C1
AT4G28190	ULT1
AT4G00080	UNE11
AT1G16730	UP6
AT2G03590	UPS1
AT2G03520	UPS4
AT1G12600	UTR4
AT2G25340	VAMP712
AT5G13900	VAS
AT5G57380	VIN3
AT2G01770	VIT1
AT2G01770	VIT1
AT4G32770	VTE1
AT1G64970	VTE4
AT5G14750	WER
AT5G14750	WER
AT3G20880	WIP4
AT3G03660	WOX11
AT3G03660	WOX11
AT5G17810	WOX12
AT5G59340	WOX2
AT5G59340	WOX2
AT5G45980	WOX8
AT3G54320	WRI1
AT3G54320	WRI1
AT4G30935	WRKY32
AT1G69810	WRKY36
AT1G13960	WRKY4
AT1G29280	WRKY65
AT5G28646	WVD2
AT3G50980	XERO1
AT3G50970	XERO2
AT5G57530	XTH12
AT5G57540	XTH13
AT4G25820	XTH14
AT1G65310	XTH17
AT4G30290	XTH19
AT5G57550	XTH25
AT4G28850	XTH26
AT3G44990	XTH31
AT5G13870	XTH5
AT5G24380	YSL2
AT5G65410	ZHD1
AT5G42780	ZHD13
AT2G32270	ZIP3
AT3G52770	ZPR3
AT1G58270	ZW9
AT2G36550	AT2G36550
AT1G53945	AT1G53945
AT1G74035	AT1G74035
AT4G11402	AT4G11402
AT2G34325	AT2G34325
AT2G03965	AT2G03965
AT3G44265	AT3G44265
AT4G16233	AT4G16233
AT3G63255	AT3G63255
AT5G24275	AT5G24275
AT3G58330	AT3G58330
AT1G55335	AT1G55335
AT4G24615	AT4G24615
AT2G22121	AT2G22121
AT4G00920	AT4G00920
AT5G01130	AT5G01130
AT2G47935	AT2G47935
AT2G06425	AT2G06425
AT4G32105	AT4G32105
AT4G34345	AT4G34345
AT1G11591	AT1G11591
AT5G40260	AT5G40260
AT4G00580	AT4G00580
AT3G43833	AT3G43833
AT2G20465	AT2G20465
AT2G01370	AT2G01370
AT4G29285	AT4G29285
AT1G56233	AT1G56233
AT5G55131	AT5G55131
AT2G45110	AT2G45110
AT1G61688	AT1G61688
AT5G15000	AT5G15000
AT5G54220	AT5G54220
AT2G44540	AT2G44540
AT1G65050	AT1G65050
AT4G19905	AT4G19905
AT1G15085	AT1G15085
AT1G48355	AT1G48355
AT5G23411	AT5G23411
AT3G07255	AT3G07255
AT4G21063	AT4G21063
AT2G12905	AT2G12905
AT2G05655	AT2G05655
AT5G59865	AT5G59865
AT5G46085	AT5G46085
AT3G20362	AT3G20362
AT2G11215	AT2G11215
AT5G03885	AT5G03885
AT1G55865	AT1G55865
AT4G23015	AT4G23015
AT1G53010	AT1G53010
AT3G14340	AT3G14340
AT1G62210	AT1G62210
AT2G11215	AT2G11215
AT4G24413	AT4G24413
AT4G21063	AT4G21063
AT1G54957	AT1G54957
AT2G35965	AT2G35965
AT4G09589	AT4G09589
AT3G52020	AT3G52020
AT1G29080	AT1G29080
AT5G44563	AT5G44563
AT1G14453	AT1G14453
AT4G22463	AT4G22463
AT3G45320	AT3G45320
AT5G17522	AT5G17522
AT1G70335	AT1G70335
AT2G15680	AT2G15680

## Sheet: specific expression genes
Embryo (pre-cotyledon)	Embryo (transition)	Embryo (mature green)	Dry seed	Germinating seed	Root	Shoot apical meristem	Nascent tissue	Leaf (vegetative)	Leaf (flowering)	Leaf (senescent)	Flower	Fruit	Immature anther	Mature anther
AT3G24250	AT5G22810	AT1G03890	AT2G05580	AT5G05290	AT4G12550	AT4G22485	AT2G16210	AT3G05730	AT1G30250	AT2G41850	AT5G07550	AT5G42180	AT4G21630	AT3G11430
AT4G33145	AT1G15085	AT1G03880	AT5G45690	AT4G36880	AT5G47450	AT4G22513	AT2G42200	AT1G31690	AT2G25510	AT5G13080	AT5G07530	AT5G37478	AT4G12960	AT5G26717
AT4G04090	AT4G30880	AT4G27140	AT1G05510	AT1G73120	AT2G33790	AT4G22510	AT4G21970	AT1G22690	AT5G35480	AT1G32350	AT3G51590	AT1G27380	AT1G61720	AT5G26692
AT4G16215	AT3G29300	AT4G27170	AT4G09600	AT1G43780	AT4G12545	AT4G22517	AT1G02065	AT5G38430	AT3G45860	AT3G03530	AT1G67990	AT2G29130	AT1G61255	AT3G43860
AT4G27670	AT5G47670	AT3G60730	AT2G40170	AT1G29090	AT5G63600	AT4G22475	AT1G53160	AT1G04800	AT1G31580	AT1G30700	AT1G68875	AT3G16920	AT3G20520	AT4G24640
AT5G61412	AT5G27200	AT4G27160	AT1G73190	AT1G60090	AT3G01190	AT3G05727	AT3G13662	AT3G55500	AT1G24147	AT5G64190	AT1G75910	AT1G65480	AT4G12890	AT2G24450
AT5G12020	AT1G48355	AT4G27150	AT4G09610	AT2G47780	AT5G46890	AT4G22520	AT2G30432	AT1G17700	AT1G52000	AT3G08860	AT1G75940	AT3G15050	AT1G24540	AT1G15385
AT4G25200	AT2G41225	AT5G07190	AT2G41280	AT5G67060	AT5G43350	AT4G22505	AT1G58460	AT5G63180	AT1G23130	AT3G46080	AT1G20130	AT5G59310	AT1G63057	AT4G25010
AT2G14160	AT4G14690	AT1G54860	AT2G42000	AT2G39415	AT4G30170	AT4G22490	AT5G53210	AT3G01500	AT5G03545	AT1G28480	AT4G28395	AT3G28270	AT4G15750	AT3G05930
AT4G10250	AT5G23411	AT2G47120	AT1G04560	AT5G10120	AT4G12510	AT1G55010	AT5G47500	AT1G33811	AT3G62550	AT3G23250	AT1G66850	AT1G22480	AT3G49270	AT3G28810
AT3G09640	AT3G16300	AT5G04380	AT4G11310	AT2G43140	AT4G12520	AT5G38930	AT5G20740	AT3G01680	AT1G19960	AT2G15780	AT3G15400	AT3G02500	AT5G58782	AT1G01980
AT1G53930	AT5G64530	AT1G78500	AT5G57550	AT3G48700	AT5G46900	AT3G59270	AT5G60880	AT3G01670	AT1G18710	AT2G29350	AT5G07560	AT3G50220	AT1G62333	AT3G17060
AT1G71470	AT4G31680	AT1G18100	AT3G15670	AT1G33790	AT4G07820	AT4G35810	AT5G27890	AT5G26000	AT5G44580	AT1G19200	AT5G48210	AT2G31930	AT1G12180	AT1G11770
AT1G53950	AT5G48490	AT1G47540	AT3G21370	AT4G21490	AT5G59090	AT5G59330	AT4G31805	AT4G38775	AT5G52310	AT4G18350	AT4G14815	AT5G15630	AT3G59030	AT1G51250
AT2G36550	AT3G07255	AT1G65880	AT3G51810	AT1G29080	AT1G26250	AT2G42610	AT1G69690	AT4G02850	AT4G23600	AT5G10625	AT3G25050	AT5G03170	AT4G21480	AT3G25170
AT1G53945	AT5G17960	AT2G18540	AT5G35660	AT1G28660	AT1G66280	AT4G22495	AT3G26200	AT3G21950	AT3G16530	AT1G68620	AT2G03740	AT5G44130	AT1G72260	AT3G25165
AT4G09940	AT1G26680	AT2G25770	AT1G75830	AT2G34080	AT5G54370	AT2G14580	AT2G44840	AT3G46780	AT1G09350	AT2G45570	AT4G28397	AT2G21140	AT5G49180	AT1G30710
AT1G49110	AT1G64585	AT3G14452	AT3G05260	AT1G54010	AT4G22212	AT5G28490	AT2G42410	AT1G09310	AT1G14880	AT3G55970	AT4G33355	AT5G44030	AT1G20680	AT5G27870
AT3G62320	AT5G62850	AT4G04840	AT5G54740	AT4G34790	AT1G73330	AT4G24540		AT1G29910	AT1G67865	AT3G01830	AT2G19070	AT1G78450	AT5G51480	AT3G05610
AT5G48510	AT1G22590	AT3G63040	AT1G54870	AT5G66260	AT1G70850	AT2G19920		AT1G20020	AT2G32880	AT3G15500	AT5G07540	AT5G17420	AT3G57250	AT2G02140
AT1G53540	AT3G14020	AT2G43520	AT3G58450	AT1G07690	AT3G12900	AT3G23290		AT4G00165	AT2G14560	AT1G67980	AT1G75930	AT1G78970	AT5G14130	AT5G58170
AT3G09110	AT1G07901	AT2G23230	AT3G22500	AT1G65340	AT5G23990	AT2G27250		AT4G21280	AT4G32280	AT5G40690	AT5G17340	AT1G13635	AT5G23260	AT3G52600
AT5G51440	AT1G26870	AT3G01570	AT1G68250	AT3G50330	AT1G52060	AT4G31620		AT3G01440	AT4G16990	AT5G52050	AT5G16960	AT1G63910	AT4G22050	AT1G49490
AT1G31400	AT1G06080	AT5G49190	AT5G50600	AT1G72070	AT4G12543	AT5G25970		AT1G60270	AT3G55646	AT4G15610	AT5G13380	AT4G18780	AT4G09960	AT3G20580
AT1G03070	AT2G12905	AT1G25270	AT3G12960	AT2G27420	AT5G43360	AT1G30950		AT1G09340	AT2G43010	AT5G27350	AT5G07510	AT5G01360	AT4G12870	AT3G02970
AT5G48350	AT5G01075	AT3G44460	AT2G42560	AT5G57530	AT1G66270	AT4G35900		AT3G63140	AT2G24850	AT2G29470	AT3G63093	AT2G21220	AT1G63522	AT1G48020
AT4G32208	AT3G10185	AT5G07200	AT2G23240	AT3G45310	AT4G14630	AT4G36570		AT4G16980	AT3G55240	AT5G43650	AT5G16920	AT2G38080	AT1G02530	AT1G11765
AT4G31760	AT1G22650	AT1G15825	AT3G56350	AT2G19590	AT2G01530	AT4G22530		AT5G38410	AT5G54610	AT2G47190	AT1G44224	AT5G50915	AT5G35550	AT1G19500
AT1G62410	AT1G29270	AT5G07500	AT1G14950	AT1G48660	AT5G23830	AT4G30250		AT1G55673	AT1G53890	AT3G49580	AT3G52160	AT2G36710	AT2G28625	AT3G26110
AT5G59720	AT5G13790	AT4G36700	AT3G22490	AT1G80340	AT4G01630	AT5G55450		AT4G13500	AT5G35490	AT3G14770	AT1G06260	AT4G26580	AT3G05460	AT3G22910
AT1G65346	AT3G05020	AT3G12203	AT1G48130	AT1G13080	AT1G23720	AT3G04510		AT5G64040	AT5G59080	AT2G39030	AT2G24210	AT2G28315	AT1G73607	AT4G02250
AT1G59860	AT3G21090	AT5G36100	AT2G21490	AT1G02640	AT3G19430	AT5G64110		AT3G48350	AT3G62750	AT5G41750	AT1G74540	AT4G08555	AT2G45840	AT3G01230
AT1G66420	AT5G22820	AT4G34520	AT4G27530	AT1G66390	AT3G13610	AT1G56430		AT4G01950	AT1G76955	AT1G11190	AT1G26720	AT3G18660	AT1G56553	AT5G48140
AT5G10890	AT5G38200	AT1G62290	AT5G66400	AT4G39500	AT2G21045	AT2G19910		AT3G18890	AT2G03310	AT2G25460	AT1G23570	AT2G37090	AT4G22880	AT3G21570
AT2G48121	AT2G05655	AT1G28640	AT2G21820	AT4G37870	AT4G25250	AT1G47395		AT4G04750	AT5G23020	AT5G25250	AT1G23240	AT2G46770	AT5G42800	AT2G16730
AT5G23180	AT1G43800	AT3G25160	AT1G32710	AT4G15230	AT4G21830	AT2G45410		AT2G36870	AT3G23480	AT1G54575	AT4G36350	AT4G27435	AT1G43640	AT5G19580
AT5G66940	AT1G15150	AT5G50770	AT5G55240	AT3G04420	AT5G62340	AT3G30340		AT1G75550	AT5G10760	AT3G48020	AT1G30020	AT1G07120	AT4G11510	AT1G14420
AT1G74035	AT3G05600	AT3G54510	AT5G55135	AT5G44563	AT3G59370	AT4G37750		AT5G45680	AT1G67870	AT2G14620	AT5G60510	AT1G32770	AT4G32170	AT2G45800
AT1G71000	AT5G63070	AT1G62000	AT2G33070	AT3G52561	AT5G60530	AT1G74890		AT3G22210	AT4G32340	AT4G14365	AT1G07340	AT3G22415	AT1G73603	AT1G54070
AT5G48890	AT5G42780	AT3G17130	AT2G27380	AT5G57760	AT2G41480	AT4G29030		AT5G35630	AT4G31500	AT4G01360	AT4G08670	AT3G51325	AT3G48230	AT3G19020
AT4G11402	AT5G15530	AT1G48470	AT1G70840	AT5G44440	AT2G38380	AT5G54510		AT1G12900	AT5G54585	AT2G31945	AT1G50310	AT5G57520	AT4G17480	AT4G33970
AT2G34325	AT5G48950	AT5G55620	AT3G22640	AT5G54190	AT1G01580	AT1G62360		AT3G16250	AT1G06160	AT4G22710	AT1G56360	AT2G40320	AT3G02670	AT3G54240
AT1G80133	AT2G16850	AT1G65090	AT1G27990	AT4G01700	AT2G41810	AT5G53486		AT2G27402	AT5G61160	AT3G05630	AT5G07520	AT1G75900	AT2G20597	AT5G39400
AT1G31390	AT1G53520	AT5G09640	AT2G41260	AT4G35090	AT1G13300	AT3G30530		AT3G05800	AT4G19170	AT5G42380	AT5G44265	AT1G78950	AT2G25540	AT2G02720
AT4G04030	AT1G56170	AT1G53690	AT5G55750	AT1G72570	AT5G43370	AT3G23635		AT3G01480	AT1G51805	AT5G38710	AT1G61110	AT5G60020	AT4G09820	AT1G04470
AT1G21970	AT4G33070	AT5G61610	AT3G53040	AT4G02700	AT1G49570	AT5G19260		AT2G42220	AT1G35710	AT1G66090	AT1G13140	AT5G25390	AT1G24010	AT1G61565
AT3G17140	AT1G72830	AT5G08360	AT5G50700	AT3G06860	AT3G32980	AT3G58770		AT4G37800	AT1G13470	AT1G73810	AT1G18280	AT5G37730	AT1G56415	AT3G62710
AT2G02770	AT2G12461	AT4G03050	AT4G21020	AT1G14453	AT2G44790	AT1G49320		AT4G34900	AT3G59060	AT1G19020	AT3G50570	AT1G29460	AT1G10540	AT5G39880
AT5G56075	AT4G25750	AT3G14630	AT5G39720	AT2G24560	AT1G51470	AT4G15320		AT1G02950	AT3G29035	AT2G46680	AT1G22760	AT1G74660	AT4G13263	AT2G47030
AT2G30560	AT3G60870	AT4G23015	AT3G50980	AT5G14450	AT3G05950	AT1G47485		AT2G30424	AT5G24210	AT2G22880	AT1G28375	AT3G62020	AT3G03828	AT5G23270
AT1G72660	AT3G25860	AT4G02360	AT1G14940	AT2G27300	AT5G48430	AT3G24450		AT1G74070	AT5G23240	AT3G19615	AT1G48940	AT1G68725	AT1G34790	AT2G46360
AT5G25450	AT3G05500	AT5G35960	AT1G72100	AT5G58900	AT2G04800	AT4G31640		AT5G18430	AT1G53875	AT3G50260	AT2G03850	AT4G28500	AT5G22200	AT5G50800
AT2G03965	AT3G05690	AT4G25980	AT3G21380	AT5G56260	AT1G08090	AT3G49110			AT3G44860	AT1G68450	AT4G20050	AT2G28305	AT1G53640	AT4G39110
AT1G44414	AT5G11160	AT1G48990	AT3G17520	AT2G03590	AT1G52070	AT2G31160			AT3G21460	AT1G01560	AT5G43340	AT3G59845	AT2G23990	AT1G60740
AT1G07400	AT5G46290	AT2G41070	AT1G07500	AT1G52100	AT1G52050	AT1G06830			AT2G20570	AT2G27389	AT1G75920	AT5G53370	AT3G08770	AT2G36020
AT5G10695	AT5G10160	AT1G61800	AT5G53895	AT5G42890	AT5G14330	AT5G50010			AT5G06530	AT1G61610	AT5G07600	AT5G67210	AT1G58055	AT2G23900
AT4G09930	AT5G39820	AT1G04778	AT2G19900	AT3G21730	AT2G39530	AT1G47400			AT3G48310	AT3G54150	AT5G61605	AT1G13650	AT5G60140	AT1G67290
AT1G12980	AT5G23190	AT1G62080	AT5G22470	AT3G09220	AT2G28160	AT5G01305			AT1G30260	AT5G52760	AT1G61070	AT3G55710	AT4G08025	AT5G43185
AT3G44265	AT2G37380	AT3G61680	AT2G19320	AT2G43860	AT5G60520	AT3G10120			AT5G23980	AT3G52400	AT4G37900	AT4G38820	AT5G46300	AT2G15880
AT4G16233	AT4G08910	AT1G15830	AT5G44310	AT2G05710	AT5G43520	AT2G44745			AT2G25200	AT5G26920	AT1G69500	AT5G54690	AT5G11360	AT2G33100
AT1G09370	AT5G59865	AT1G17430	AT5G62490	AT5G55050	AT1G47600	AT3G28560			AT1G51270	AT1G65690	AT3G13220	AT1G68723	AT3G01323	AT1G68110
AT3G20840	AT1G75430	AT2G29980	AT1G07985	AT5G02270	AT4G37160	AT4G14103			AT3G47480	AT1G08920	AT4G34850	AT2G41610	AT5G42567	AT2G44560
AT4G29770	AT1G22170	AT4G05110	AT5G06760	AT5G39080	AT3G16410	AT1G16530			AT4G04330	AT4G00700	AT1G20120	AT5G25240	AT4G26590	AT1G05580
AT3G54490	AT1G52670	AT3G23090	AT2G23110	AT1G62580	AT3G01260	AT3G60890			AT4G17245	AT5G24160	AT1G26710	AT4G33790	AT5G16453	AT4G18596
AT1G51190	AT5G46085	AT1G12064	AT2G23640	AT3G62860	AT5G10130	AT1G75120			AT2G46430	AT5G17650	AT1G22010	AT1G27440	AT4G09466	AT1G55560
AT1G54050	AT4G01900	AT2G45900	AT2G47770	AT3G23790	AT2G05510	AT3G25640			AT1G13245	AT3G28580	AT3G18590	AT5G49740	AT2G24205	AT2G05850
AT4G00390	AT1G30120	AT1G28030	AT5G01670	AT4G20690	AT5G23840	AT1G78430			AT2G20880	AT4G34410	AT2G20870	AT3G43190	AT4G16563	AT4G27580
AT1G77160	AT2G11891	AT1G62225	AT1G29680	AT1G14120	AT5G02780	AT1G26780			AT4G02520	AT1G05575	AT1G74550	AT5G47530	AT3G29810	AT5G15140
AT5G63085	AT1G50110	AT1G15160	AT1G07645	AT1G26762	AT4G19690	AT5G12330			AT5G49730	AT3G63050	AT3G15830	AT1G62220	AT1G20730	AT5G50040
AT3G01070	AT3G52960	AT4G27250	AT4G25580	AT2G42430	AT3G23190	AT5G23000			AT1G03020	AT3G22160	AT1G62940	AT3G07340	AT3G13540	AT2G27180
AT5G43240	AT4G25100	AT3G05300	AT2G35300	AT1G64590	AT2G39040	AT5G03350			AT5G40450	AT3G49120	AT1G71160	AT1G09610	AT1G02940	AT4G03290
AT3G09120	AT3G20362	AT1G78390	AT1G08170	AT2G22780	AT4G33120	AT1G14760			AT2G32290	AT1G67860	AT4G10260	AT1G29450	AT5G21150	AT4G18425
AT2G20835	AT5G55250	AT4G14980	AT5G43770	AT5G66170	AT3G16440	AT1G54930			AT5G10410	AT5G57510	AT5G60500	AT5G18080	AT5G48605	AT1G66210
AT4G15975	AT1G47840	AT1G01250	AT1G17010	AT1G28670	AT1G29025	AT3G63440			AT1G08890	AT1G10585	AT2G23800	AT1G74650	AT4G21640	AT1G58120
AT5G14690	AT5G16390	AT2G44470	AT2G34740	AT5G27600	AT5G42500	AT3G27920			AT5G28030	AT3G48520	AT5G20240	AT1G62070	AT1G47470	AT4G00350
AT2G24310	AT4G20140	AT1G16490	AT5G51760	AT3G16450	AT1G49860	AT1G22490			AT3G05660	AT3G55910	AT3G23840	AT3G55990	AT3G24230	AT1G23350
AT5G37140	AT1G68480	AT1G04330	AT2G33520	AT5G36140	AT1G05660	AT3G19184			AT3G19850	AT3G02150	AT1G44191	AT1G75280	AT5G55320	AT2G47340
AT3G59480	AT2G43360	AT3G47750	AT5G01300	AT4G11340	AT4G11880	AT2G34925			AT1G06460	AT5G27420	AT5G09500	AT4G08040	AT1G51300	AT5G15110
AT1G19410	AT3G18960	AT1G33700	AT4G10020	AT5G60770	AT1G74770	AT1G11125			AT3G15840	AT2G20142	AT5G20710	AT4G00120	AT2G42830	AT5G58050
AT4G23493	AT1G24360	AT2G25130	AT1G32560	AT2G17850	AT5G62330	AT3G13175			AT3G46130	AT3G28210	AT1G75300	AT2G33385	AT5G17220	AT3G62180
AT2G43745	AT1G10960	AT4G03040	AT1G14930	AT3G22840	AT3G24300	AT5G55340			AT5G17460	AT3G55890	AT3G05960	AT3G11680	AT1G71690	AT1G01310
AT5G55430	AT1G66250	AT1G53010	AT4G18680	AT3G16400	AT3G25930	AT5G11930			AT5G66490	AT5G18270	AT3G14380	AT2G21200	AT3G24510	AT5G47000
AT3G63255	AT1G47990	AT2G38530	AT5G65165	AT5G13360	AT3G09940	AT5G03840			AT2G23680	AT1G02310	AT1G15360	AT3G45730	AT4G23350	AT3G13390
AT3G50090	AT1G23750	AT5G62100	AT5G54070	AT5G11520	AT1G67148	AT5G51800			AT3G11280	AT1G10340	AT2G36190	AT5G19175	AT1G12672	AT3G19310
AT5G66990	AT2G21050	AT3G50230	AT4G36600	AT1G01453	AT4G15393	AT3G12890			AT3G62950	AT4G31240	AT1G23670	AT1G53282	AT3G17150	AT2G31500
AT4G01260	AT4G10150	AT5G17310	AT5G18450	AT4G10265	AT5G62420	AT3G54820			AT4G23140	AT5G49600	AT1G35310	AT1G54040	AT4G30067	AT3G28750
AT4G33660	AT1G23000	AT2G27360	AT3G03341	AT2G30970	AT5G45070	AT1G68640			AT5G57340	AT3G48850	AT1G61680	AT1G61810	AT4G09462	AT4G13075
AT5G39930	AT2G05990	AT3G19500	AT1G75490	AT5G37990	AT5G66390	AT2G26400			AT1G64360	AT1G33030	AT2G18420	AT5G18020	AT2G03933	AT1G17540
AT5G55440	AT1G03210	AT5G43860	AT2G03520	AT3G21351	AT5G19890	AT1G18193			AT3G16800	AT5G22380	AT1G21540	AT5G12870	AT1G05490	AT5G19473
AT4G22105	AT1G74030	AT5G24380	AT1G02700	AT4G28790	AT5G59520	AT4G23720			AT3G50840	AT2G30140	AT1G23660	AT1G32100	AT4G24260	AT3G61160
AT5G48570	AT3G53450	AT3G14340	AT3G19920	AT2G33710	AT4G22214	AT1G76420			AT5G58670	AT1G76650	AT5G22430	AT1G64130	AT3G01326	AT3G42640
AT1G56040	AT1G54580	AT1G62500	AT5G07330	AT3G23880	AT5G04970	AT2G18500			AT1G68520	AT5G41740	AT2G18130	AT1G72230	AT5G60553	AT5G60615
AT1G66870	AT2G42110	AT3G12670	AT4G18650	AT3G62960	AT2G23630	AT1G02730			AT4G00880	AT1G20180	AT4G27570	AT2G22990	AT3G25260	AT1G76370
AT5G56060	AT3G16950	AT1G79690	AT5G52300	AT4G16210	AT3G13435	AT5G15160			AT5G22270	AT1G79680	AT3G01530	AT5G18030	AT4G09090	AT2G43230
AT4G00210	AT2G46990	AT3G14360	AT3G15280	AT2G31750	AT2G43880	AT4G08150			AT3G45260	AT2G34810	AT4G32460	AT2G29045	AT2G21727	AT2G22055
AT4G25380	AT1G34430	AT4G28800	AT1G03790	AT3G20395	AT2G43610	AT4G04630			AT5G58570	AT3G51960	AT1G28430	AT3G45870	AT1G10745	AT3G07820
AT4G24420	AT2G45870	AT5G28910	AT4G15396	AT1G70000	AT3G62040	AT2G43800			AT1G75460	AT1G24140	AT1G79780	AT2G36430	AT5G46297	AT5G62750
AT3G20880	AT1G09420	AT1G08630	AT5G59170	AT2G36080	AT2G27550	AT3G53190			AT3G53720	AT3G04070	AT1G06990	AT3G58740	AT4G39000	AT2G26450
AT5G45980	AT5G01340	AT2G03090	AT2G28420	AT5G02760	AT3G22570	AT1G55580			AT5G09220	AT1G48260	AT2G41040	AT2G45220	AT4G14276	AT3G01085
AT1G06475	AT5G67411	AT1G12600	AT2G36640	AT2G26040	AT2G44380	AT5G50580			AT5G38980	AT3G55900	AT1G23580	AT1G32170	AT3G61172	AT2G26850
AT2G38430	AT1G68120	AT1G62210	AT1G16770	AT5G24990	AT1G53635	AT1G15550			AT1G29395	AT1G73040	AT2G46880	AT5G06930	AT2G36695	AT2G33420
AT1G68320	AT4G13050	AT4G32770	AT1G52690	AT4G27450	AT5G60660	AT5G07180			AT4G15990	AT5G16360	AT5G46795	AT3G23050	AT4G14730	AT5G07430
AT1G25150	AT3G09190	AT3G58200	AT5G66780	AT5G45920	AT2G43890	AT2G17770			AT1G33720	AT3G02840	AT4G35420	AT1G70270	AT5G47150	AT1G47280
AT5G03590	AT1G01090	AT2G01200	AT1G16730	AT2G29490	AT3G49845	AT1G28290			AT1G22570	AT4G36950	AT2G32890	AT1G59730	AT1G14455	AT5G27980
AT1G21940	AT2G21650	AT1G60983	AT1G27461	AT3G21330	AT4G37070	AT1G14630			AT4G23270	AT5G58350	AT3G59530	AT1G78815	AT2G20605	AT3G26934
AT1G71870	AT5G40030	AT5G64080	AT4G02690	AT5G13370	AT1G05650	AT5G03790			AT3G25690	AT4G37370	AT3G26125	AT1G32080	AT2G27880	AT5G54095
AT3G22090	AT5G48360	AT2G24800	AT5G54000	AT5G60060	AT2G30210	AT2G30760			AT3G23550	AT5G22250	AT1G18960	AT1G66230	AT1G60985	AT3G54800
AT5G09240	AT1G10990	AT1G73210	AT2G25340	AT1G13670	AT4G21850	AT1G78370			AT3G28080	AT1G14370	AT1G24400	AT4G25845	AT4G09153	AT5G28690
AT1G30070	AT5G01650	AT3G21560	AT3G11050	AT4G22463	AT4G33420	AT1G76800			AT5G19140	AT3G16860	AT1G23560	AT3G27835	AT5G33340	AT1G08140
AT1G12830	AT1G55865	AT2G31180	AT5G65550	AT1G06290	AT1G26255	AT1G13400			AT1G03400	AT2G45760	AT3G52810	AT1G15757	AT1G45190	AT1G24520
AT5G24275	AT3G12970	AT3G43110	AT5G10000	AT3G51410	AT2G42060	AT3G25670			AT1G22370	AT5G58120	AT2G42990	AT2G33233	AT1G73560	AT1G10770
AT4G16230	AT3G57080	AT1G68170	AT5G42290	AT5G36150	AT1G14220	AT2G32280			AT5G66052	AT5G53730	AT5G59040	AT1G72220	AT5G42232	AT3G01700
AT5G23480	AT1G76500	AT5G16023	AT3G48270	AT3G45320	AT2G18800	AT3G61250			AT1G29600	AT2G30840	AT1G30350	AT1G26797	AT1G50325	AT3G06260
AT3G58330	AT2G46850	AT4G35390	AT4G16160	AT5G05430	AT5G53250	AT4G31630			AT2G15890	AT2G15480	AT1G11850	AT3G62820	AT2G02490	AT4G04930
AT1G55335	AT5G38195	AT5G16240	AT5G12030	AT4G37580	AT5G50200	AT3G13960			AT2G29630	AT3G10815	AT1G75880	AT1G53285	AT2G33750	AT4G39610
AT1G13590	AT5G57420	AT1G68470	AT2G29300	AT5G45650	AT3G23175	AT2G36985			AT3G50750	AT3G14440	AT1G12570	AT2G19802	AT5G60964	AT1G25240
AT4G24615	AT1G54840	AT1G54740	AT5G40382	AT1G29120	AT3G46280	AT1G57820			AT5G61520	AT3G11150	AT5G49070	AT5G57800	AT5G23212	AT5G12000
AT2G22121	AT5G36710	AT5G55370	AT5G53260	AT3G60070	AT5G35940	AT4G12440			AT1G07280	AT1G05100	AT3G54340	AT5G36700	AT2G42860	AT1G29140
AT4G28190	AT1G03457	AT2G41290	AT2G21720	AT1G17345	AT5G09978	AT5G48820			AT4G15540	AT5G49520	AT3G20450	AT1G68200	AT2G22942	AT1G76965
AT1G37140	AT1G12230	AT1G17830	AT5G25180	AT4G34250	AT5G63660	AT3G49620			AT1G33960	AT3G56200	AT5G33370	AT3G49307	AT1G57760	AT5G04180
AT2G47520	AT2G39705	AT5G59590	AT3G46230	AT2G42280	AT3G20940	AT4G39410			AT2G45660	AT3G49210	AT1G33430	AT4G01420	AT1G56620	AT3G18810
AT3G48770	AT3G12060	AT4G32290	AT5G45310	AT5G42250	AT1G68150	AT5G64667			AT1G11530	AT5G04340	AT3G25810	AT4G29110	AT2G22620	AT1G28270
AT4G29760	AT3G57500	AT3G44720	AT3G61040	AT1G22360	AT3G32030	AT4G32980			AT1G52200	AT4G08290	AT4G26830	AT2G15325	AT2G36325	AT3G17980
AT5G64720	AT2G01210	AT5G60460	AT4G21680	AT1G64970	AT3G03500	AT3G23230			AT1G61300	AT1G32960	AT3G18360	AT1G69523	AT3G60900	AT2G33270
AT2G01790	AT3G03590	AT1G27350	AT2G27940	AT5G16980	AT4G08770	AT1G09812			AT2G04080	AT1G72800	AT4G27420	AT5G59290	AT3G04300	AT5G38435
AT2G20720	AT3G63430	AT3G14450	AT2G25890	AT5G26270	AT1G66800	AT2G45190			AT5G46490	AT3G15518	AT1G75050	AT1G19300	AT3G46770	AT3G36659
AT4G31615	AT3G09035	AT1G11170	AT4G06746	AT4G17870	AT3G02850	AT4G24265			AT5G43740	AT1G73805	AT3G47870	AT5G42242	AT1G23420	AT3G01240
AT3G60670	AT2G22230	AT3G19150	AT5G05220	AT1G66060	AT4G36430	AT3G57130			AT3G13062	AT3G13672	AT5G47635	AT1G43667	AT5G27495	AT5G12180
AT4G00920	AT3G25110	AT3G05190	AT3G54940	AT1G01390	AT3G51330	AT5G51550			AT2G29320	AT4G27410	AT2G40610	AT1G33760	AT1G73610	AT3G62640
AT5G35770	AT3G15690	AT3G16190	AT5G60220	AT5G25190	AT3G29410	AT1G19050			AT5G59780	AT1G30135	AT4G19620	AT4G23400	AT1G11593	AT3G13227
AT1G11270	AT1G77110	AT5G46690	AT5G66430	AT3G09520	AT5G42590	AT2G30540			AT1G21100	AT3G24460	AT1G26945	AT3G16895	AT5G45910	AT4G25780
AT1G13230	AT5G12360	AT1G64660	AT3G57020	AT5G36130	AT2G01880	AT5G28640			AT4G27740	AT3G05165	AT5G37170	AT5G39090	AT5G50423	AT4G30140
AT1G76110	AT1G58160	AT3G05320	AT5G16460	AT1G55760	AT5G05960	AT3G25560			AT3G05370	AT2G34500	AT3G27809	AT1G13607	AT5G04047	AT3G26860
AT1G66780	AT2G19810	AT4G39800	AT4G22100	AT5G44306	AT5G51520	AT1G18835			AT2G40750	AT3G49130	AT4G16515	AT2G32487	AT5G24420	AT4G02650
AT4G28365	AT5G17840	AT5G17810	AT1G66770	AT1G17020	AT5G24070	AT1G80580			AT4G01915	AT5G13820	AT3G27810	AT1G43666	AT5G18403	AT5G50830
AT1G79960	AT3G25880	AT5G24120	AT5G66110	AT4G25990	AT1G45015	AT5G53950			AT1G64720	AT5G35735	AT1G23520	AT5G23210	AT1G27080	AT5G35110
AT5G01130	AT5G41160	AT3G14950	AT1G03106	AT1G62570	AT4G13235	AT3G17680			AT1G75380	AT5G48410	AT3G02030	AT5G39150	AT2G12465	AT5G20390
AT1G25210	AT4G16155	AT5G52230	AT5G50240	AT3G14610	AT2G28671	AT1G69880			AT2G32680	AT3G19580	AT1G20190	AT3G28853	AT2G24693	AT5G28680
AT2G47935	AT5G52920	AT2G16595	AT4G18620	AT5G23730	AT4G30280	AT4G34160			AT5G50950	AT1G72520	AT3G54830	AT5G51190	AT5G60130	AT1G04540
AT2G01430	AT3G15820	AT3G61880	AT1G15330	AT3G59710	AT1G07610	AT3G28455			AT1G66910	AT2G05910	AT1G20132	AT5G37260	AT4G13955	AT2G31430
AT4G00320	AT5G26790	AT1G17100	AT1G26400	AT5G40860	AT4G13580	AT1G75240			AT4G05130	AT5G05600	AT5G03620	AT1G49435	AT4G13080	AT5G55930
AT2G06425	AT1G76470	AT5G04370	AT1G62420	AT4G21870	AT2G39430	AT3G06640			AT4G18830	AT3G17790	AT2G16910	AT4G26220	AT5G60945	AT1G61860
AT5G50270		AT4G21860	AT1G19530	AT2G33150	AT1G56160	AT2G40130			AT4G23130	AT1G72900	AT4G39480	AT3G55840	AT5G24316	AT3G43120
AT4G32105		AT5G52860	AT4G26050	AT1G11580	AT5G40590	AT1G49830			AT1G56120	AT5G17350	AT2G38540	AT2G43050	AT5G12060	AT3G20865
AT4G31660		AT5G27360	AT5G53270	AT2G20180	AT5G04730	AT3G62740			AT1G23310	AT1G21240	AT5G55720	AT1G62060	AT5G61730	AT2G33775
AT3G51910		AT4G24413	AT1G23070	AT2G07000	AT4G24310	AT1G78580			AT5G57040	AT3G29000	AT1G32780	AT3G08900	AT5G18090	AT3G09530
AT4G00250		AT1G25530	AT5G04010	AT2G38230	AT2G27370	AT1G69910			AT5G18240	AT5G51680	AT1G23590	AT5G01190	AT2G06090	AT4G18395
AT2G14846		AT3G03770	AT5G45870	AT2G19800	AT4G27400	AT2G29125			AT4G11900	AT2G25450	AT4G04760	AT2G14365	AT2G02493	AT1G74010
AT2G38810		AT3G56870	AT4G02280	AT4G04955	AT5G48070	AT1G70510			AT3G50740	AT5G22540	AT4G04460	AT5G10230	AT5G43518	AT5G49920
AT4G34345		AT4G20070	AT5G56100	AT4G26150	AT3G15370	AT2G02010			AT3G52430	AT2G38250	AT3G10570	AT4G38825	AT5G18000	AT3G20190
AT5G50070		AT1G18940	AT1G19540	AT5G27410	AT5G19110	AT5G01660			AT1G25440	AT5G25140	AT5G24790	AT1G21395	AT3G30247	AT3G06490
AT3G09130		AT2G36500	AT1G22600	AT1G09570	AT2G31081	AT2G21060			AT4G29190	AT5G13170	AT5G38120	AT4G29300	AT3G05741	AT5G13580
AT2G46240		AT2G39980	AT1G16850	AT3G27400	AT1G31885	AT5G01120			AT3G46880	AT5G48400	AT1G78160	AT1G29440	AT3G17230	AT5G26700
AT4G16820		AT5G62170	AT1G62710	AT1G05680	AT5G01330	AT1G67040			AT5G17450	AT2G27500	AT5G45960	AT1G69900	AT2G03040	AT4G38190
AT3G15340		AT3G13310	AT1G54957	AT3G03170	AT3G16390	AT5G65510			AT5G44005	AT3G12910	AT3G58240	AT1G34580	AT1G69818	AT2G28180
AT5G64310		AT4G36280	AT5G04000	AT5G07450	AT1G31050	AT3G13510			AT1G73870	AT5G63130	AT1G78960	AT5G11070	AT1G60030	AT3G56180
AT1G28300		AT1G74300	AT2G34315	AT2G32560	AT3G06460	AT3G10880			AT5G44870	AT3G21790	AT1G75790	AT4G12825	AT5G51845	AT5G50030
AT3G58210		AT5G66100	AT5G05320	AT3G11580	AT1G53680	AT3G44716			AT5G25040	AT5G05300	AT1G23250	AT1G08985	AT1G71890	AT1G61566
AT5G48480		AT2G43710	AT2G37810	AT5G15120	AT2G31085	AT2G31141			AT1G07240	AT5G46240	AT1G18520	AT1G66810	AT1G52470	AT3G20530
AT5G05640		AT1G63960	AT5G63350	AT4G10560	AT4G15330	AT4G14723			AT3G11110	AT2G47950	AT3G48290	AT2G47060	AT5G01180	AT3G60570
AT5G52547		AT3G49551	AT5G52570	AT5G17522	AT5G60950	AT1G04520			AT1G72890	AT3G26840	AT1G12080	AT1G52190	AT3G50020	AT3G02810
AT1G11591		AT5G17700	AT3G03620	AT5G15860	AT2G22122	AT1G64260			AT2G42690	AT3G46090	AT5G11130	AT5G54490	AT1G16705	AT2G13350
AT4G16220		AT4G14780	AT5G60760	AT5G05420	AT3G23510	AT1G36940			AT1G80440	AT1G32940	AT3G44555	AT5G52655	AT5G27238	AT1G01460
AT2G20800		AT2G34060	AT5G57260	AT2G04100	AT5G03570	AT2G01990			AT3G11010	AT2G41380	AT1G22380	AT5G01200	AT3G24065	AT1G08150
AT3G58400		AT1G12845	AT2G33590	AT4G23050	AT1G06120	AT2G27990			AT1G52870	AT3G63280	AT5G48900	AT3G20080	AT5G47175	AT1G28335
AT5G46871		AT3G10200	AT2G18340	AT2G02040	AT2G36120	AT5G22930			AT1G66140	AT2G24600	AT2G04570	AT1G19320	AT3G48580	AT4G35010
AT1G10522		AT2G25737	AT1G30860	AT1G55740	AT2G37170	AT3G57030			AT2G35830	AT1G27730	AT2G16360	AT5G26810	AT5G61120	AT4G36490
AT5G38565		AT1G14580	AT3G26770	AT5G44110	AT5G43180	AT1G23380			AT2G19650	AT5G13320	AT1G13150	AT5G10220	AT1G63950	AT1G61563
AT1G20140		AT5G09480	AT5G06755	AT2G24280	AT2G16005	AT1G68360			AT2G20670	AT1G79900	AT5G17500	AT1G51500	AT2G04046	AT3G52010
AT1G60830		AT3G26290	AT3G12955	AT5G17040	AT5G06200	AT3G18715			AT3G43790	AT1G18570	AT2G21237	AT5G63250	AT5G62740	AT5G24105
AT2G02130		AT5G40610	AT1G12130	AT3G61070	AT5G55110	AT1G65810			AT4G11521	AT1G07590	AT1G68540	AT3G17155	AT1G25460	AT2G07040
AT3G22100		AT5G03200	AT1G25422	AT1G76690	AT3G45060	AT1G70260			AT1G63360	AT5G06230	AT3G58290	AT5G56369	AT5G62627	AT2G34825
AT1G22470		AT3G29030	AT1G03990	AT1G15500	AT2G48080	AT4G07995			AT2G23840	AT1G45145	AT3G10580	AT5G18060	AT1G56710	AT5G61720
AT5G35320		AT1G79170	AT4G35160	AT3G54990	AT4G18510	AT4G31730			AT1G55450	AT5G64240	AT4G36230	AT2G04790	AT1G69820	AT4G19038
AT3G09350		AT3G58980	AT5G64750	AT3G23530	AT1G50050	AT5G02140			AT1G71030	AT4G18010	AT3G01980	AT1G71120	AT5G28000	AT1G18990
AT5G12110		AT2G45080	AT2G02930	AT5G38020	AT2G35270	AT5G01840			AT1G56010	AT1G35210	AT2G18969	AT3G45248	AT5G56300	AT5G07410
AT3G59650			AT5G50360	AT2G47880	AT1G09090	AT3G57040			AT3G04720	AT5G62680	AT3G44250	AT1G59670	AT5G43525	AT5G14380
AT1G78922			AT2G35965	AT5G50760	AT5G42580	AT5G20820			AT1G69450	AT2G41640	AT1G23600	AT1G29500	AT2G25295	AT1G65970
AT5G37320			AT4G12680	AT2G43910	AT4G02090	AT3G02493			AT2G29670	AT5G03204	AT1G35180	AT1G31250	AT2G32790	AT2G40990
AT1G63730			AT3G44290	AT5G63450	AT1G54950	AT5G58390			AT2G46100	AT5G58680	AT5G57240	AT3G03850	AT5G39220	AT2G18470
AT2G35605			AT5G63030	AT3G43850	AT1G50560	AT3G45160			AT4G13830	AT3G53960	AT2G28630	AT5G63580	AT3G55665	AT3G21180
AT5G03580			AT5G61490	AT4G27730	AT4G15340				AT3G56410	AT2G38470	AT2G28085	AT1G72580	AT3G61120	AT2G47040
AT3G18610			AT1G70985	AT5G07000	AT4G25400				AT1G62630	AT2G04050	AT2G38110	AT4G28780	AT1G65150	AT1G03050
AT1G32375			AT1G07473	AT2G37640	AT1G29020				AT4G23240	AT3G22370	AT4G18960	AT4G22115	AT1G31290	AT4G26260
AT5G45095			AT5G50170	AT5G43060	AT5G56320				AT1G27200	AT5G49525	AT3G53140	AT4G32000	AT4G16600	AT3G10460
AT2G21930			AT5G20960	AT3G17609	AT3G23430				AT3G63110	AT1G31820	AT1G63710	AT1G31720	AT5G47920	AT5G18910
AT3G17152			AT5G05965	AT1G02620	AT3G49860				AT3G27940	AT1G78230	AT5G49260	AT2G28760	AT1G45130	AT4G32510
AT5G18790			AT2G29380	AT1G49660	AT4G17800				AT3G18500	AT3G04060	AT3G58340	AT3G27960	AT4G32090	AT2G26410
AT3G59730			AT4G18920	AT1G71110	AT4G04745				AT1G10760	AT4G35783	AT1G10747	AT5G43780	AT2G28650	AT3G49540
AT3G09680			AT5G64210	AT2G22590	AT4G31470				AT4G15765	AT2G32140	AT1G64405	AT4G22570	AT5G38970	AT3G16040
AT4G00893			AT4G16620	AT1G03850	AT4G26320				AT5G38510	AT1G19180	AT4G22960	AT1G72160	AT4G00750	AT5G46770
AT5G25090			AT2G38465	AT4G15233	AT1G14080				AT5G66640	AT5G61820	AT2G17470	AT1G56190	AT1G77210	AT3G13400
AT3G44590			AT1G03120	AT5G40010	AT2G19060				AT5G22390	AT2G27310	AT3G45180	AT5G63230	AT1G21475	AT5G16500
AT3G11600			AT5G02750	AT5G19550	AT3G05155				AT3G43670	AT5G22520	AT1G01600	AT1G09440	AT1G59724	AT3G18220
AT2G40200			AT3G50970	AT1G06360	AT4G31910				AT1G12280	AT5G46780	AT5G53190	AT4G09350	AT1G79840	AT2G25600
AT2G18020			AT5G47810	AT3G15720	AT3G24020				AT5G38990	AT2G38640	AT1G66120	AT5G16410	AT1G68905	AT3G01270
AT3G23830			AT1G52920	AT3G28345	AT2G39200				AT2G15390	AT5G01225	AT1G58430	AT4G01680	AT2G23148	AT4G29460
AT1G11510			AT1G46768	AT4G36610	AT3G12240				AT1G49470	AT3G25570	AT2G22960	AT1G47317	AT5G61740	AT1G70540
AT3G44490			AT2G45360	AT3G59140	AT3G56970				AT1G10090	AT1G69480	AT1G66540	AT1G27250	AT2G45650	AT1G35490
AT3G50410			AT1G62510	AT3G61990	AT2G31083				AT2G41560	AT1G17420	AT2G39060	AT5G57920	AT2G14900	AT4G33860
AT2G46150			AT3G44830	AT2G25220	AT3G49190				AT3G56060	AT1G80840	AT2G27930	AT3G23030	AT4G30070	AT3G52460
AT1G71770			AT2G45510	AT4G11140	AT4G30420				AT5G01750	AT5G23950	AT1G32250	AT4G32100	AT1G35537	AT5G61710
AT2G45135			AT3G16120	AT4G31330	AT5G15130				AT3G47420	AT2G32130	AT1G61700	AT5G12460	AT3G49055	AT4G33230
AT5G02220			AT2G43580	AT5G63810	AT3G18450				AT3G26740	AT2G40000	AT2G36180	AT1G26796	AT2G35760	AT2G41860
AT3G45960			AT4G36620	AT1G69530	AT3G47980				AT3G27650	AT2G32190	AT1G55260	AT3G48280	AT2G35250	AT3G57690
AT1G23100			AT2G36770	AT5G60120	AT4G13620				AT5G13720	AT3G56790	AT1G24600	AT3G04943	AT1G21950	AT2G40850
AT1G34047			AT3G15260	AT2G47130	AT3G29430				AT2G43920	AT4G30490	AT1G28695	AT3G54550	AT5G12270	AT5G43300
AT5G15380			AT5G52640	AT3G19930	AT1G19900				AT3G23120	AT4G20830	AT4G34470	AT4G23180	AT1G20350	AT5G07420
AT5G15200			AT4G27460	AT2G29420	AT4G30450				AT4G27800	AT3G14050	AT3G55290	AT1G79620	AT1G73620	AT5G64790
AT4G25890			AT4G13160	AT1G71015	AT4G12090				AT5G15970	AT1G52890	AT2G31210	AT1G52695	AT1G51240	AT3G61230
AT4G16165			AT5G45860	AT1G21110	AT5G56540				AT3G30720	AT4G17500	AT2G42140	AT1G04380	AT5G51950	AT4G34380
AT5G15360			AT5G57790	AT4G38210	AT1G71740				AT1G32520	AT3G23240	AT4G19430	AT1G48195	AT1G77520	AT2G19000
AT1G31335			AT1G77450	AT1G70335	AT1G30550				AT5G28020	AT1G07620	AT4G24140	AT3G23167	AT1G51020	AT1G02790
AT3G11520			AT2G20770	AT1G25180	AT2G25260				AT3G03000	AT3G10930	AT1G24020	AT4G11180	AT3G25420	AT1G11250
AT2G37540			AT3G14880	AT2G38310	AT4G20210				AT4G34881	AT4G18050	AT1G69560	AT5G47640	AT3G28007	AT4G27790
AT1G27400			AT2G01340	AT1G68500	AT1G09560				AT2G39920	AT3G59700	AT1G75890	AT2G02147	AT5G56510	AT2G18180
AT5G56700			AT2G18570	AT1G53920	AT1G77885				AT2G39000	AT4G10120	AT5G52250	AT3G13370	AT5G01790	AT5G15600
AT5G20180			AT5G07360	AT5G17490	AT4G13860				AT2G15580	AT4G18990	AT2G32430	AT1G31255	AT3G13890	AT3G56600
AT5G63500			AT2G14520	AT5G43570	AT1G73780				AT4G23880	AT1G62840	AT5G07490	AT4G38860	AT1G08810	AT5G39420
AT1G12340			AT1G77120	AT5G17390	AT2G43150				AT5G36930	AT1G79520	AT4G28580	AT5G38160	AT2G39640	AT1G49270
AT5G58420			AT5G52420	AT2G15680	AT3G26610				AT5G46450	AT2G34600	AT3G21910	AT5G41900	AT5G18290	AT3G22510
AT1G01940			AT1G01720	AT1G53887	AT4G37940				AT3G21670	AT2G31990	AT1G29640	AT5G60910	AT2G37260	AT1G44160
AT4G00580			AT4G18660	AT5G43170	AT2G28960				AT3G51420	AT3G09830	AT1G23510	AT5G59510	AT5G47075	AT5G12960
AT5G09510			AT2G44990	AT5G06250	AT1G53610				AT4G08870	AT4G22470	AT2G16130	AT2G23550	AT5G07280	AT1G79860
AT2G25060			AT1G77100	AT1G80640	AT1G55990				AT4G23890	AT5G13180	AT3G02677	AT5G05030	AT3G62340	AT3G04700
AT2G38620			AT5G23230	AT2G34340	AT2G27660				AT2G36470	AT5G63970	AT2G29880	AT1G76020	AT5G06070	AT1G52580
AT3G11640			AT4G09589	AT3G48920	AT3G51642				AT4G04040	AT2G44480	AT2G19110	AT2G14690	AT4G10850	AT4G14315
AT4G31360			AT2G31985	AT3G27820	AT1G49030				AT5G02200	AT2G30040	AT3G24640	AT4G36410	AT2G21450	AT4G15980
AT3G10400			AT1G74310	AT1G11300	AT5G15265				AT1G53633	AT1G53580	AT5G25460	AT5G58310	AT5G50365	AT2G21990
AT3G07110			AT1G69540	AT3G06145	AT5G58860				AT5G46440	AT5G49450	AT3G28857	AT1G59920	AT2G03937	AT5G56640
AT3G43833			AT2G36270	AT5G57220	AT2G17080				AT3G47430	AT3G26440	AT5G61620	AT5G16600	AT1G51460	AT3G20220
AT2G30000			AT5G65100	AT4G34135	AT4G38410				AT1G13750	AT4G00940	AT3G22275	AT5G65730	AT5G50050	AT2G46300
AT4G33160			AT5G65080	AT4G37220	AT4G01750				AT3G04030	AT4G12735	AT5G55590	AT2G44250	AT1G11370	AT3G07850
AT3G22930			AT2G42950	AT5G05440	AT3G56980				AT3G29670	AT2G35730	AT2G16520	AT4G09890	AT1G77093	AT2G46860
AT5G46880			AT1G07150	AT2G40080	AT3G20590				AT5G26690	AT2G42890	AT5G29560	AT4G33330	AT4G21590	AT5G14895
AT1G19115			AT5G01680	AT4G17810	AT1G14240				AT3G50470	AT1G47890	AT3G58260	AT4G22680	AT3G43960	AT2G22180
AT4G31985			AT2G22240	AT2G32390	AT5G45080				AT1G13210	AT2G27150	AT3G21960	AT5G25610	AT4G29650	AT1G28306
AT4G30800			AT3G53230	AT5G43630	AT4G01770				AT1G22500	AT3G50930	AT3G03650	AT1G17620	AT1G07090	AT3G06830
AT3G06700			AT4G37420	AT1G76680	AT5G19970				AT5G57345	AT4G23150	AT2G31980	AT4G04580	AT1G05540	AT3G14040
AT3G07090			AT1G09665	AT5G22300	AT4G20240				AT5G27950	AT4G01870	AT2G42900	AT2G39800	AT1G22240	AT2G42005
AT1G33500			AT3G14590	AT5G53660	AT1G78000				AT2G43970	AT3G08720	AT4G25850	AT3G20100	AT5G64900	AT5G55980
AT1G01370			AT5G45630	AT3G43600	AT5G44585				AT5G05690	AT2G40390	AT4G14750	AT5G63240	AT5G17800	AT4G10010
AT5G08150			AT4G18690	AT1G49600	AT3G47210				AT1G33340	AT1G57990	AT3G17630	AT2G27700	AT5G02540	AT2G26490
AT4G29390			AT5G55470	AT4G34131	AT1G68880				AT5G41410	AT3G44260	AT4G38092	AT1G27940	AT1G78710	AT2G40116
AT4G00100			AT5G24130		AT4G13440				AT3G27250	AT1G13990	AT3G54700	AT5G22920	AT1G47610	AT4G28000
AT1G66080			AT3G01990		AT2G14820				AT2G22430	AT1G28190	AT5G24780	AT4G17718	AT3G01322	AT3G05725
AT5G23535			AT4G09590		AT2G35380				AT5G44820	AT2G18680	AT5G14345	AT2G01300	AT4G22390	AT1G28305
AT5G42700			AT4G20820		AT1G26700				AT4G19370	AT1G75000	AT5G41130	AT5G42710	AT1G52030	AT5G25340
AT2G29540			AT5G42690		AT1G51800				AT3G60415	AT5G47560	AT5G65205	AT1G79180	AT4G38700	AT3G03800
AT1G66040			AT4G15563		AT1G05530				AT1G02340	AT4G31800	AT1G72980	AT5G50750	AT1G20550	AT2G38500
AT3G53650			AT2G38870		AT2G39518				AT1G48745	AT1G70640	AT5G56110	AT1G67775	AT4G24975	AT4G28280
AT1G28135			AT1G70800		AT1G14185				AT3G59940	AT4G32250	AT4G28090	AT3G61910	AT5G67620	AT3G62170
AT5G11340			AT1G43160		AT2G44370				AT1G01180	AT1G61660	AT2G30630	AT2G32690	AT1G72970	AT2G33460
AT5G58110			AT1G03470		AT4G21250				AT5G44530	AT1G01480	AT4G22730	AT4G19035	AT5G42230	AT2G41905
AT2G42740			AT5G66580		AT4G14640				AT3G11660	AT3G60966	AT4G27330	AT2G36724	AT3G48950	AT2G35765
AT2G01370			AT5G03180		AT5G57770				AT2G41190	AT4G23450	AT2G30650	AT5G06720	AT1G67265	AT5G19360
AT1G50490			AT5G62480		AT5G58784				AT1G25550	AT3G44350	AT4G26390	AT5G60720	AT5G46540	AT3G48450
AT1G15900			AT1G72680		AT1G53940				AT5G48540	AT1G75040	AT1G10560	AT4G08530	AT4G17505	AT5G59370
AT1G22270			AT4G39890		AT2G14920				AT4G03410	AT5G25770	AT4G00040	AT1G62280	AT4G24130	AT3G03430
AT3G59200			AT4G38810		AT1G30730				AT1G69720	AT2G05540	AT5G64820	AT1G72180	AT4G20800	AT3G01630
AT4G30380			AT1G77880		AT1G73270				AT5G20110	AT5G24530	AT1G06170	AT4G28270	AT2G03290	AT1G28550
AT3G49010			AT2G45040		AT5G15830				AT5G54720	AT3G21690	AT3G60100	AT5G57560	AT1G61097	AT3G46520
AT4G35590			AT2G29090		AT5G02360				AT4G22980	AT4G28040	AT5G49130	AT4G00872	AT1G03170	AT3G21700
AT2G17900			AT5G58160		AT4G25220				AT3G47500	AT1G66760	AT1G76410	AT1G01120	AT4G09500	AT1G55570
AT1G51405			AT3G59580		AT5G24100				AT3G10130	AT4G25000	AT2G32360	AT5G48945	AT4G02670	AT5G62240
AT4G25630			AT4G27070		AT3G47200				AT1G23110	AT5G64230	AT1G69180	AT5G63225	AT3G21310	AT5G02570
AT4G31700			AT4G27780		AT4G24340				AT2G04495	AT3G62150	AT4G28700	AT1G59930	AT4G10640	AT1G02000
AT3G24500			AT5G24970		AT1G71692				AT1G22710	AT2G15310	AT1G06250	AT1G19940	AT1G07710	AT5G42490
AT3G56340			AT3G51750		AT1G31950				AT5G52120	AT4G23220	AT2G39350	AT4G34138	AT3G58780	AT3G20300
AT1G15930			AT3G03310		AT3G20380				AT2G41510	AT1G08940	AT4G35110	AT5G51890	AT2G03505	AT3G52620
AT3G01410			AT3G04000		AT1G53470				AT5G67420	AT2G22760	AT5G19640	AT1G26799	AT4G29610	AT2G21480
AT3G57490			AT3G05510		AT5G19040				AT3G26510	AT2G31880	AT5G56368	AT1G78520	AT3G05975	AT1G13970
AT3G50870			AT2G19930		AT4G23510				AT1G34315	AT4G38060	AT4G22755	AT2G28110	AT4G08875	AT1G68610
AT5G47830			AT1G15960		AT1G14160				AT4G11360	AT2G30020	AT5G52400	AT5G25330	AT4G29640	AT1G61290
AT4G36830			AT3G02990		AT1G06930				AT1G19660	AT5G47850	AT1G79800	AT5G54225	AT4G24040	AT3G10455
AT1G14980			AT4G19390		AT1G53830				AT1G53100	AT1G08290	AT5G15780	AT1G49200	AT2G39510	AT1G24620
AT2G25140			AT5G49990		AT5G45210				AT5G25440	AT3G15760	AT1G20310	AT3G28990	AT2G27130	AT5G39310
AT1G55650			AT1G69800		AT3G04330				AT3G26160	AT2G02710	AT3G20820	AT4G28400	AT4G22400	AT1G23150
AT4G32605			AT1G49390		AT1G64920				AT5G57190	AT5G10300	AT4G01080	AT3G10150	AT3G23130	AT2G43386
AT3G15680			AT3G52020		AT5G51500				AT2G46690	AT1G04500	AT3G07010	AT4G21040	AT5G24280	AT1G64740
AT3G17611			AT4G04870		AT3G47220				AT5G57350	AT1G28600	AT4G09460	AT3G27785	AT4G16447	AT2G24370
AT2G20585			AT1G33102		AT3G01513				AT3G59210	AT5G25910	AT2G38995	AT2G47750	AT5G46873	AT4G25590
AT5G09250			AT4G03200		AT3G24210				AT3G56240	AT1G47510	AT5G08640	AT2G29370	AT2G03210	AT4G35180
AT5G47170			AT1G74370		AT2G31020				AT5G63850	AT2G38800	AT3G28220	AT2G26320	AT3G27620	AT3G44070
AT5G45775			AT1G27300		AT4G25090				AT2G25735	AT4G29780	AT1G78955	AT1G71250	AT3G57310	AT2G22805
AT1G70350			AT3G23340		AT3G02240				AT5G35370	AT5G05410	AT1G10060	AT5G24770	AT1G03710	AT3G28780
AT3G08030			AT4G36900		AT4G08620				AT3G57460	AT4G17250	AT2G10940	AT3G21710	AT2G28870	AT5G20410
AT1G29250			AT1G15180		AT3G62280				AT1G80920	AT1G61420	AT4G39590	AT3G45252	AT5G65370	AT1G50610
AT1G72670			AT2G16890		AT5G06800				AT4G13345	AT3G19010	AT3G63088	AT3G01415	AT1G23010	AT2G17890
AT3G62250			AT3G56770		AT5G40980				AT2G46600	AT5G43380	AT5G18010	AT2G05335	AT2G12480	AT5G61680
AT2G20940			AT3G46660		AT4G22610				AT2G38170	AT4G27830	AT5G03480	AT5G46830	AT3G21500	AT5G25430
AT1G04070			AT1G19490		AT1G09740				AT3G25010	AT1G74360	AT1G73325	AT1G49770	AT4G17660	AT3G04360
AT2G31230			AT2G45290		AT5G26080				AT1G69490	AT1G76360	AT3G43270	AT1G52830	AT4G18320	AT1G22990
AT5G14860			AT2G42150		AT3G58810				AT4G21930	AT4G39955	AT3G04290	AT2G23580	AT5G67360	AT5G45840
AT5G20290			AT5G67520		AT2G24300				AT4G31380	AT1G63750	AT5G03120	AT5G46340	AT4G33840	AT2G46210
AT1G56233			AT5G22290		AT3G02620					AT5G54840	AT2G45600	AT5G10930	AT3G29020	AT2G14282
AT3G04770			AT5G58070		AT5G10435					AT3G60690	AT1G75290	AT2G20160	AT1G76250	AT3G28770
AT2G27720			AT3G48990		AT5G63590					AT4G38560	AT1G23060	AT5G56870	AT3G61090	AT3G01620
AT5G22440			AT3G10020		AT3G18280					AT4G13250	AT5G49330	AT3G47190	AT2G19510	AT4G27110
AT3G19508			AT5G35375		AT1G16400					AT1G64610	AT1G55330	AT1G29465	AT5G58830	AT5G05070
AT1G55205			AT5G44280		AT5G43540					AT2G32150	AT1G52827	AT1G19380	AT1G02190	AT3G60780
AT3G22230			AT2G43500		AT2G26820					AT5G38240	AT1G48750	AT2G32370	AT4G27980	AT1G23540
AT4G20040			AT2G34360		AT5G25640					AT3G26100	AT1G62305	AT1G29050	AT3G60520	AT2G22340
AT4G30064			AT3G27870		AT3G27070					AT1G16130	AT5G24570	AT1G04220	AT2G41990	AT3G42880
AT1G78190			AT3G14130		AT5G59680					AT5G18310	AT5G64850	AT1G27045	AT1G75390	AT4G29470
AT5G55131			AT1G33490		AT1G12110					AT4G24000	AT5G17165	AT5G07260	AT2G46810	AT2G19030
AT5G47700			AT4G26120		AT4G13300					AT3G19660	AT1G23730	AT1G14380	AT4G27900	AT2G19010
AT3G16080			AT4G13010		AT3G14260					AT3G27210	AT2G29340	AT5G42223	AT1G19830	AT5G41780
AT3G18485			AT1G67600		AT2G21100					AT1G06570	AT1G15260	AT4G21080	AT4G19630	AT5G45880
AT2G45110			AT3G04040		AT5G24230					AT1G05010	AT4G18550	AT1G78820	AT1G52400	AT4G03620
AT1G67460			AT1G01520		AT1G08990					AT2G32030	AT5G16440	AT5G67110	AT5G52810	AT2G10970
AT1G54250			AT1G08050		AT3G47710					AT5G40240	AT5G17030	AT1G04580	AT5G45320	AT3G01870
AT3G60770			AT1G14530		AT2G20080					AT3G62260	AT5G03250	AT1G49130	AT1G66465	AT1G13890
AT2G37270			AT2G38820		AT1G76240					AT1G17380	AT1G09930	AT1G62340	AT5G67460	AT2G21540
AT3G53740			AT5G67480		AT1G47480					AT4G27652	AT2G18970	AT1G59800	AT2G01850	AT2G45405
AT5G57820			AT2G42975		AT3G25790					AT4G28490	AT4G23680	AT3G12880	AT5G51750	AT3G58480
AT2G30615			AT4G23990		AT5G52790					AT5G61430	AT1G30080	AT5G55132	AT1G73080	AT5G03690
AT4G03965			AT1G02816		AT4G08780					AT4G22758	AT3G29370	AT2G40520	AT1G52410	AT1G75160
AT2G20490			AT1G30500		AT3G27950					AT2G16700	AT5G27940	AT3G20750	AT3G13640	AT4G35700
AT4G32870			AT4G12130		AT2G21840					AT1G69890	AT2G41540	AT5G20670	AT5G48650	AT2G19050
AT3G16050			AT5G63190		AT3G16690					AT3G03470	AT5G16190	AT1G11070	AT5G02490	AT4G04980
AT1G61688			AT5G22460		AT1G51850					AT4G39580	AT3G55700	AT2G03200	AT3G49050	AT1G74000
AT3G06610			AT3G07500		AT5G56080					AT3G55470	AT4G01883	AT3G26070	AT5G12970	AT5G13990
AT1G61570			AT1G12940		AT5G11920					AT2G23450	AT4G27590	AT5G39280	AT3G28500	AT3G24715
AT3G05560			AT3G51880		AT5G50560					AT5G03495	AT1G01630	AT5G09805	AT2G34150	AT4G14810
AT4G32380			AT2G06005		AT5G50660					AT1G77890	AT3G15540	AT1G10880	AT3G45940	AT3G05820
AT2G34260			AT1G01355		AT1G51860					AT4G36040	AT1G51440	AT1G22160	AT5G45670	AT2G32460
AT1G52300			AT1G48840		AT2G16970					AT4G25390	AT1G02205	AT2G03190	AT3G22820	AT5G40720
AT4G26780			AT1G03770		AT3G04570					AT5G45900	AT2G47160	AT3G42830	AT1G52750	AT1G05820
AT1G77940			AT3G16990		AT5G65210					AT1G79270	AT2G41170	AT3G16570	AT5G65710	AT2G03250
AT3G53830			AT3G12490		AT1G24320					AT5G47910	AT3G18850	AT3G21830	AT5G47590	AT1G10620
AT3G08690			AT3G17860		AT3G46330					AT5G04980	AT2G39820	AT5G48100	AT2G41940	AT3G05150
AT3G02080			AT1G15230		AT1G30990					AT5G18630	AT5G46730	AT5G62150	AT3G60160	AT5G60010
AT5G15000			AT1G74410		AT1G70880					AT5G05190	AT1G54820	AT1G60986	AT1G12460	AT3G13229
AT3G11650			AT3G52230		AT3G26470					AT2G26690	AT1G66400	AT3G24690	AT1G22980	AT5G36260
AT2G21580			AT2G34355		AT3G44320					AT5G44990	AT4G12580	AT2G17723	AT2G31110	AT2G38240
AT3G07150			AT4G28005		AT5G50443					AT5G62520	AT4G22240	AT5G07160	AT2G20710	AT1G11572
AT2G26150			AT1G17090		AT4G15160					AT1G67856	AT1G72280	AT2G43290	AT2G28040	AT1G72330
AT1G59865			AT5G57900		AT4G32860					AT1G47128	AT2G40475	AT1G27920	AT2G44450	AT5G09430
AT3G01600			AT1G02380		AT1G30720					AT5G54940	AT4G17680	AT5G42235	AT1G05550	AT5G20100
AT2G22088			AT4G30935		AT3G52790					AT5G65600	AT5G52390	AT4G17160	AT5G54400	AT5G24880
AT5G11680			AT5G17550		AT1G50580					AT1G18300	AT1G65620	AT5G06020	AT5G53390	AT5G15430
AT3G47370			AT3G42860		AT3G06990					AT2G17840	AT5G46650	AT2G30810	AT2G44690	AT1G24405
AT1G56240			AT3G03490		AT5G15180					AT5G05110	AT5G20270	AT3G45130	AT2G19970	AT5G54780
AT5G53870			AT3G58270		AT1G06090					AT1G53885	AT3G52500	AT4G03945		AT3G17660
AT4G03292			AT3G20660		AT5G44920					AT1G53903	AT3G10525	AT5G03820		AT1G11990
AT5G54220			AT3G50940		AT3G24670					AT5G19240	AT1G63840	AT3G01324		AT4G07960
AT5G18065			AT1G63180		AT1G79310					AT3G06500	AT2G17950	AT5G24355		AT1G79910
AT2G27580			AT3G14330		AT3G46720					AT1G74450	AT1G48330	AT1G27220		AT1G60760
AT5G36960			AT1G12060		AT1G50520					AT4G24570	AT3G24420	AT3G61175		AT3G56920
AT3G52770			AT1G74710		AT3G12977					AT1G73750	AT4G04020	AT2G44578		AT5G64510
AT5G53400			AT3G14700		AT3G03280					AT1G49900	AT4G16270	AT5G03720		AT2G35215
AT3G05685			AT3G03776		AT4G17215					AT4G20260	AT3G19620	AT1G27360		AT4G34440
AT5G38310			AT5G08240		AT1G05260					AT5G39590	AT5G44680	AT5G54067		AT1G32120
AT5G37340					AT1G78860					AT1G12640		AT5G38800		AT1G78460
AT5G43640					AT5G52260					AT3G60961		AT1G63690		AT5G24940
AT3G58360					AT2G26370					AT1G20620		AT3G23930		AT3G57950
AT4G38290					AT3G55150					AT4G34180		AT4G13380		AT4G13450
AT3G08970					AT2G24400					AT2G32800		AT1G21910		AT5G42340
AT4G29330					AT3G51350					AT2G36220		AT5G17470		AT1G51210
AT5G60610					AT4G11780					AT5G24660		AT1G02630		AT4G13240
AT4G19905					AT2G41800					AT3G19270		AT5G38960		AT2G35210
AT1G02980					AT3G54040					AT1G69610		AT3G23360		AT2G48150
					AT5G10430					AT4G23610		AT5G39260		AT4G35610
					AT2G22630					AT1G11700		AT2G04750		AT3G27416
					AT4G20230					AT2G05940		AT2G10535		AT4G17690
					AT1G73300					AT1G35230		AT3G52970		AT1G49290
					AT1G03870					AT1G09070		AT5G04045		AT4G16745
					AT4G11050					AT1G62200		AT1G24030		AT4G18700
					AT1G61590					AT5G52450		AT3G61177		AT5G54240
					AT1G56630					AT5G49480		AT5G38170		AT5G20690
					AT5G24410					AT1G71040		AT2G02498		AT5G24240
					AT5G10720					AT1G22930		AT3G01327		AT1G24110
					AT4G13890					AT2G45170		AT3G27999		AT2G33870
					AT5G57620					AT5G23010		AT1G20500		AT3G27415
					AT2G37430					AT1G72450		AT1G10717		AT3G59830
					AT3G51680					AT3G51730		AT1G43665		AT1G52240
					AT5G38550					AT3G62590		AT1G23200		AT4G32630
					AT4G01240					AT5G54730		AT3G62070		AT1G04450
					AT3G27150					AT1G60730		AT3G09870		AT5G01690
					AT1G73165					AT2G25440		AT2G04034		AT3G50390
					AT5G65980					AT1G05783		AT5G09490		AT5G11440
					AT3G13760					AT5G49630		AT5G15800		AT4G18790
					AT4G13310					AT5G67310		AT1G78760		AT3G55180
					AT1G30510					AT5G61010		AT5G63087		AT3G13065
					AT5G24030					AT5G43260		AT2G23260		AT3G42180
					AT2G26650					AT3G18950		AT2G46960		AT5G10660
					AT5G38030					AT2G30550		AT3G29152		AT1G51410
					AT5G05900					AT5G04250		AT3G15960		AT2G28640
					AT5G01740					AT4G16790		AT1G28590		AT2G19980
					AT2G39410					AT1G76600		AT5G25410		AT4G15650
					AT1G51790					AT4G18170		AT5G37473		AT5G47470
					AT5G07390					AT3G56360		AT5G59845		AT5G17590
					AT2G23410					AT4G23250		AT2G02515		AT3G55190
					AT4G25310					AT5G13550		AT1G13605		AT3G10986
					AT4G37850					AT5G18490		AT4G26420		AT3G59290
					AT1G22230					AT1G09970		AT4G15050		AT5G01700
					AT1G13480					AT3G07700		AT1G14520		AT1G07330
					AT5G63595					AT1G58360		AT5G39130		AT3G45280
					AT3G20850					AT3G01840		AT1G54445		AT1G60240
					AT3G21680					AT2G33080		AT4G39917		AT1G79250
					AT1G78850					AT1G74930		AT5G38197		AT3G23380
					AT1G73160					AT3G46930		AT3G01329		AT5G60480
					AT5G19230					AT1G17340		AT5G51105		AT2G19330
					AT2G35000					AT2G32830		AT5G46950		AT2G31830
					AT1G78090					AT1G11310		AT3G24068		AT2G03840
					AT4G01350					AT4G26080				AT3G24620
					AT5G41300					AT1G76980				AT1G70170
					AT2G44220					AT5G03210				AT2G20320
					AT1G18910					AT2G41100				AT2G20430
					AT2G14960					AT2G23430				AT5G57690
					AT4G05200					AT3G61190				AT5G40155
					AT1G14550					AT3G03540				AT5G35390
					AT3G20130					AT2G35070				AT1G01780
					AT1G79320					AT4G16640				AT4G29880
					AT3G07720					AT4G29230				AT2G24320
					AT5G49870					AT3G20600				AT1G69050
					AT1G43650					AT1G80310				AT4G12860
					AT4G35380					AT4G39140				AT2G13620
					AT3G48940					AT4G21120				AT4G34510
					AT5G45280					AT4G13030				AT2G18480
					AT1G05700					AT2G22500				AT4G31875
					AT4G10350					AT1G48720				AT3G29060
					AT4G22210					AT5G15190				AT1G63930
					AT5G01490					AT3G18830				AT1G64235
					AT1G52660					AT2G01670				AT3G26880
					AT3G07000					AT4G13920				AT2G23445
					AT3G22800					AT4G12290				AT4G29658
					AT2G43480					AT1G17745				AT1G16760
					AT3G62760					AT1G70530				AT5G35090
					AT1G67110					AT1G44350				AT1G43630
					AT4G37700					AT1G32640				AT5G10090
					AT5G65790					AT2G01180				AT5G16100
					AT2G44340					AT1G77000				AT2G45610
					AT3G61410					AT3G51970				AT3G47340
					AT1G48070					AT5G39050				AT1G29230
					AT1G63245					AT2G06050				AT5G47540
					AT1G65570					AT3G22260				AT1G04700
					AT3G10660					AT1G67070				AT5G40620
					AT4G10370					AT3G51430				AT4G17210
					AT4G06744					AT2G23790				AT4G38230
					AT1G15640					AT2G20500				AT1G73860
					AT2G02610					AT1G47960				AT5G56750
					AT2G34350					AT5G57910				AT1G44120
					AT4G26470					AT3G47960				AT1G77980
					AT2G16385					AT4G13770				AT3G13130
					AT2G38600					AT2G02240				AT3G22750
					AT3G21240					AT2G39050				AT3G02440
					AT3G14510					AT5G54870				AT3G05140
					AT3G20360					AT5G63790				AT5G14602
					AT1G65481					AT1G76520				AT4G15200
					AT4G33880					AT3G10420				AT4G30770
					AT1G34670					AT4G37310				AT3G27410
					AT2G22930					AT1G17990				AT1G32450
					AT2G28970					AT3G27110				AT1G70790
					AT5G45580					AT1G28380				AT4G24380
					AT5G02000					AT4G00330				AT2G37980
					AT3G51340					AT3G19900				AT5G37060
					AT5G44910					AT2G05520				AT3G12660
					AT4G37340					AT4G23230				AT5G26150
					AT3G45650					AT1G72940				AT3G10470
					AT3G21340					AT5G45350				AT1G54280
					AT1G08670					AT1G07900				AT3G19970
					AT1G44608					AT1G63720				AT5G61360
					AT1G71400					AT5G45110				AT3G13660
					AT1G52120					AT4G19960				AT3G51300
					AT4G21340					AT1G51340				AT2G31432
					AT2G41240					AT3G07350				AT4G20160
					AT4G30190					AT2G20960				AT5G25530
					AT1G60989					AT1G78280				AT5G60740
					AT5G26070					AT1G23710				AT5G58180
					AT2G35850					AT4G37520				AT4G27350
					AT2G19210					AT4G15260				AT1G51915
					AT1G12160					AT4G26060				AT5G01610
					AT5G41290					AT1G09080				AT3G44703
					AT3G48260					AT2G46030				AT5G24655
					AT5G44020					AT1G69260				AT3G11740
					AT3G63360					AT3G23920				AT4G40020
					AT1G11080					AT3G52800				AT1G47270
					AT1G78120					AT1G16410				AT5G39365
					AT5G57480					AT1G09480				AT3G22650
					AT3G46500					AT3G44310				AT4G18422
					AT2G26290					AT2G24180				AT4G05553
					AT1G77690					AT1G32920				AT2G38910
					AT4G16350					AT5G08790				AT1G73630
					AT1G11540					AT2G37760				AT5G64690
					AT2G29440					AT5G44567				AT4G39180
					AT3G61430					AT5G67245				AT4G05330
					AT3G56000					AT5G55560				AT1G05020
					AT4G00670					AT4G21534				AT2G23660
					AT2G28670					AT2G21620				AT3G12160
					AT2G02630					AT5G46080				AT2G28440
					AT1G76210					AT5G66070				AT1G21140
					AT1G65985					AT1G66500				AT1G72460
					AT2G39110					AT1G30755				AT3G25950
					AT3G49630					AT2G02390				AT5G16540
					AT1G11545					AT2G23810				AT5G13150
					AT5G02400					AT1G66830				AT4G18640
					AT5G38700					AT4G13820				AT5G38391
					AT3G12220					AT1G76070				AT5G66740
					AT1G48690					AT1G02660				AT2G37010
					AT1G70860					AT2G44500				AT5G54130
					AT4G14650					AT3G43250				AT1G21010
					AT5G42655					AT2G40270				AT5G45810
					AT3G62210					AT5G13220				AT4G24580
					AT4G23550					AT2G33580				AT4G25150
					AT1G52910					AT4G34230				AT1G67540
					AT5G65970					AT3G47090				AT2G19500
					AT4G31100					AT4G30300				AT1G51260
					AT1G33840					AT1G77770				AT2G33670
					AT1G51420					AT5G18980				AT2G38400
					AT4G17280					AT3G56400				AT1G74830
					AT3G60550					AT1G23040				AT2G45310
					AT5G01250					AT4G34390				AT4G31230
					AT3G63470					AT5G66630				AT1G54215
					AT5G38820					AT3G09010				AT3G22920
					AT1G30560					AT3G55980				AT5G10500
					AT4G25560					AT2G29450				AT2G27430
					AT1G33540					AT3G17770				AT4G34750
					AT2G29060					AT1G13360				AT1G08135
					AT5G15725					AT1G33110				AT5G57320
					AT5G20045					AT3G11080				AT1G64320
					AT3G03520					AT3G52710				AT5G14870
					AT2G21850					AT4G35600				AT3G23170
					AT3G47040					AT1G72920				AT2G17010
					AT4G19880					AT3G11410				AT2G30505
					AT5G26310					AT2G16790				AT4G10510
					AT1G64910					AT1G62560				AT2G04220
					AT4G32780					AT5G05250				AT1G61130
					AT4G29800					AT2G13790				AT5G40645
					AT2G13820					AT4G33920				AT5G60260
					AT1G33280					AT5G59550				AT3G58490
					AT4G08380					AT1G23440				AT3G52080
					AT5G45510					AT1G27100				AT5G54560
					AT1G10810					AT1G20510				AT1G31990
					AT1G52330					AT2G37710				AT1G67623
					AT4G37235					AT2G25000				AT1G06970
					AT5G43420					AT5G42050				AT2G19690
					AT1G16905					AT4G13110				AT5G21080
					AT5G42860					AT2G24240				AT5G08250
					AT5G38100					AT2G16050				AT4G16040
					AT2G31082					AT2G21500				AT2G19400
					AT2G17070					AT5G06860				AT4G37409
					AT1G76952					AT4G16957				AT1G79400
					AT1G62320					AT4G12030				AT3G06270
					AT3G20935					AT5G09876				AT2G07180
					AT2G36690					AT5G61640				AT1G15350
					AT4G25410					AT4G36710				AT1G68090
					AT1G48510					AT4G37180				AT5G09910
					AT4G28410					AT5G08480				AT2G43220
					AT1G13430					AT5G51640				AT2G34440
					AT3G44326					AT5G26940				AT5G45820
					AT1G23160					AT4G27480				AT2G02970
					AT1G13530					AT1G16110				AT4G38730
					AT4G18940					AT1G12200				AT1G30050
					AT5G24960					AT1G72770				AT4G35655
					AT1G17060					AT5G54170				AT3G04690
					AT5G06740					AT1G72060				AT1G64300
					AT5G48940					AT3G12740				AT2G15340
					AT4G15300					AT5G57050				AT5G20810
					AT1G63410					AT1G73000				AT5G58880
					AT4G21230					AT1G70290				AT4G24170
					AT4G12360					AT5G59400				AT1G50290
					AT2G32610					AT1G28260				AT1G12070
					AT3G07900					AT1G28570				AT3G23270
					AT5G10990					AT4G17230				AT3G28490
					AT5G26320					AT3G58990				AT1G16360
					AT5G18860					AT3G15534				AT4G33390
					AT1G63450					AT5G27150				AT1G74220
					AT1G55240					AT4G39780				AT3G28630
					AT5G28630					AT1G56510				AT5G21050
					AT3G58710					AT2G17220				AT1G77730
					AT4G14130					AT1G70700				AT1G11040
					AT3G20160					AT1G14330				AT1G64630
					AT4G05170					AT3G10500				AT3G03700
					AT5G66870					AT1G74950				AT5G61700
					AT3G50400					AT5G16080				AT5G17400
					AT3G50130					AT4G26090				AT3G08730
					AT2G23960					AT5G13760				AT2G41210
					AT3G54960					AT1G10070				AT1G50990
					AT4G01925					AT1G15740				AT5G60580
					AT1G02520					AT3G30390				AT3G12690
					AT1G10530					AT1G14340				AT1G53190
					AT4G01110					AT1G65860				AT3G57480
					AT1G35250					AT2G46790				AT1G18410
					AT5G03995					AT3G19240				AT3G19274
					AT4G34880					AT1G15790				AT1G02820
					AT4G15500					AT2G17760				AT5G03760
					AT4G30120					AT4G34710				AT1G04890
					AT4G18340					AT2G31955				AT1G78940
					AT1G43020					AT5G08660				AT1G06750
					AT1G75540					AT5G05140				AT3G57140
					AT2G32620					AT3G05360				AT5G60070
					AT1G76090					AT5G42010				AT1G09245
					AT3G15250					AT5G25110				AT5G46200
					AT1G16370					AT2G46650				AT3G07960
					AT2G28990					AT1G27980				AT4G26930
					AT1G59780					AT1G63090				AT2G46260
					AT2G46940					AT5G61560				AT5G46930
					AT2G34300					AT3G04640				AT5G24560
					AT5G28080					AT5G48380				AT3G06778
					AT4G14550					AT4G04610				AT4G01575
					AT1G07560					AT3G63310				AT3G53510
					AT4G28650					AT1G21410				AT2G18080
					AT2G18450					AT1G76390				AT4G31260
					AT1G76640					AT4G25030				AT5G48270
					AT4G14465					AT5G54080				AT5G25425
					AT3G13650					AT1G75410				AT3G20200
					AT5G44480					AT1G48300				AT3G56420
					AT1G54540					AT1G68670				AT5G14480
					AT5G10280					AT1G75450				AT4G28556
					AT4G09770					AT3G13380				AT1G12450
					AT1G24280					AT5G59540				AT4G12530
					AT3G61390					AT4G00970				AT3G49870
					AT1G57590					AT1G34420				AT5G15040
					AT5G07110					AT1G08230				AT5G52990
					AT1G61750					AT3G12520				AT3G09760
					AT1G06923					AT5G59820				AT2G16030
					AT1G33320					AT4G22780				AT3G47410
					AT1G28815					AT4G39940				AT5G61690
					AT1G41830					AT1G51760				AT5G47620
					AT2G39370					AT2G46670				AT2G30690
					AT1G35260					AT4G08850				AT1G12150
					AT5G59940					AT5G67300				AT3G57390
					AT1G60095					AT4G21980				AT4G09950
					AT2G23050					AT1G18590				AT2G39700
					AT2G31540					AT1G54130				AT1G78980
					AT5G51310					AT4G03320				AT3G13850
					AT2G46495					AT2G35060				AT1G43810
					AT1G44050					AT5G40960				AT1G60410
					AT3G05900					AT3G14690				AT1G61080
					AT1G11920					AT5G43620				AT5G04347
					AT2G45890					AT5G54470				AT3G11690
					AT5G45480					AT3G17510				AT3G12620
					AT1G10480					AT3G57640				AT4G30850
					AT5G61550					AT5G41790				AT3G59880
					AT5G05790					AT5G14780				AT5G38390
					AT2G16230					AT5G47070				AT2G29040
					AT5G48290					AT4G13395				AT5G10260
					AT3G13432					AT1G21400				AT2G16016
					AT5G07080					AT4G13530				AT5G02720
					AT1G34040					AT1G70250				AT1G14290
					AT5G16170					AT3G54140				AT5G56160
					AT5G65390					AT1G76180				AT2G22290
					AT5G19100					AT4G34150				AT5G16480
					AT3G09490					AT5G62570				AT1G20280
					AT3G07425					AT5G10190				AT3G13900
					AT5G19700					AT5G38850				AT5G39650
					AT4G09110					AT1G64170				AT3G47130
					AT2G45550					AT1G22190				AT3G21550
					AT3G29635					AT3G43230				AT4G14368
					AT1G72300					AT2G01460				AT2G40180
					AT1G07730					AT1G18470				AT1G14686
					AT1G30900					AT3G60110				AT5G65160
					AT1G58037					AT1G53570				AT5G19610
					AT3G11385					AT1G19270				AT5G04390
					AT5G06730					AT4G12300				AT2G39890
					AT2G19660					AT3G09910				AT5G50790
					AT4G22070					AT1G24100				AT2G30240
					AT2G38300					AT3G50950				AT3G14560
					AT3G17420					AT3G57530				AT3G54740
					AT3G44710					AT1G80300				AT1G06540
					AT5G49770					AT1G60140				AT3G62660
					AT2G30395					AT5G12890				AT5G41390
					AT1G50090					AT5G01540				AT5G12390
					AT5G09520					AT1G06650				AT4G26400
					AT1G35330					AT1G01770				AT1G71697
					AT1G11450					AT2G39710				AT1G67480
					AT1G04180					AT3G13080				AT5G23160
					AT3G60270					AT5G04040				AT5G27000
					AT4G39770					AT1G71960				AT5G46150
					AT3G46400					AT1G73540				AT3G09550
					AT1G56680					AT5G03490				AT1G19780
					AT1G60787					AT2G27830				AT5G58460
					AT5G39320					AT1G73920				AT2G31940
					AT2G31310					AT4G29950				AT1G74490
					AT2G29330					AT2G18660				AT4G00110
					AT4G14940					AT4G28140				AT1G04600
					AT3G49940					AT4G27657				AT5G61960
					AT1G22550					AT3G26580				AT3G44920
					AT1G10380					AT1G09530				AT3G54880
					AT1G14730					AT1G33970				AT2G30360
					AT5G18661					AT2G31260				AT1G10740
					AT2G25680					AT3G15810				AT3G10340
					AT2G45400					AT1G29800				AT5G65380
					AT3G51360					AT3G49570				AT3G25900
					AT1G56320					AT5G29000				AT1G16290
					AT2G41780					AT1G34260				AT2G37370
					AT2G23400					AT1G06050				AT2G03060
					AT2G40900					AT1G72540				AT3G11850
					AT3G51540					AT5G53450				AT1G01500
					AT1G18290					AT1G70630				AT2G29410
					AT5G43040					AT4G37680				AT3G56960
					AT3G29630					AT5G60270				AT2G37670
					AT5G53990					AT1G76970				AT4G37760
					AT5G38790					AT1G12320				AT2G29050
					AT2G15620					AT1G68820				AT1G33770
					AT5G57070					AT5G13700				AT5G27090
					AT3G43890					AT4G17615				AT5G55855
					AT5G22555					AT4G16890				AT1G02010
					AT5G44578					AT2G28400				AT3G48010
					AT1G70990					AT5G01720				AT5G05380
					AT1G55430					AT3G45640				AT2G03980
					AT3G32040					AT2G20610				AT2G19045
					AT2G46890					AT5G37070				AT2G20440
					AT5G07780					AT5G59430				AT4G10595
					AT2G34940					AT5G61420				AT3G52000
					AT4G14390					AT5G64660				AT4G27880
					AT1G53180					AT1G59910				AT5G61980
					AT5G40090					AT3G14270				AT1G16380
					AT1G61050					AT3G45010				AT5G59120
					AT1G61840					AT4G15490				AT5G39865
					AT3G14530					AT5G40370				AT3G06560
					AT5G37800					AT1G09180				AT5G02430
					AT5G48920					AT1G29400				AT3G07120
					AT4G12390					AT3G54600				AT5G24150
					AT1G15630					AT1G16670				AT4G39870
					AT3G12540					AT1G07630				AT5G02390
					AT2G34830					AT5G13190				AT2G46500
					AT4G35030					AT1G08450				AT5G02180
					AT4G12330					AT2G46510				AT4G08630
					AT5G53320					AT3G17000				AT2G14265
					AT4G32950					AT3G46110				AT5G07170
					AT4G15740					AT1G69410				AT3G45810
					AT4G11530					AT5G01850				AT2G25530
					AT1G59960					AT2G17705				AT4G20380
					AT5G51470					AT4G21470				AT3G02555
					AT2G17720					AT1G64950				AT1G64800
					AT1G53660					AT3G54620				AT3G46270
					AT1G22220					AT4G21990				AT2G29620
					AT3G50010					AT3G59080				AT2G44280
					AT4G18360					AT1G01550				AT4G20870
					AT1G70950					AT1G08800				AT4G12430
					AT1G66020					AT1G04440				AT1G42560
					AT2G35910					AT4G39270				AT1G09600
					AT5G44770					AT3G17800				AT1G32430
					AT1G74458					AT2G40110				AT4G20880
					AT4G03610					AT5G26770				AT2G37620
					AT3G47400					AT5G62430				AT1G68440
					AT5G15150					AT1G55960				AT1G34440
					AT1G27670					AT5G05930				AT1G32361
					AT3G19320					AT5G22850				AT1G52342
					AT1G06330					AT2G26660				AT2G45406
					AT1G11460					AT1G70520				AT1G03920
					AT5G54020					AT2G30440				AT1G03620
					AT2G40890					AT1G67470				AT3G16380
					AT1G34760					AT5G44290				AT3G19610
					AT5G26660					AT3G20250				AT5G58380
					AT2G17290					AT1G17030				AT2G25344
					AT1G30760					AT2G39660				AT5G57200
					AT4G15400					AT1G61460				AT4G03420
					AT3G01720					AT5G67140				AT5G41730
					AT4G31110					AT4G19200				AT4G24630
					AT2G21550					AT5G16450				AT2G36320
					AT2G26480					AT4G34890				AT4G33905
					AT5G44160					AT2G23320				AT4G34940
					AT4G01480					AT3G15770				AT4G26650
					AT1G04250					AT5G01380				AT3G48780
					AT5G59930					AT4G04960				AT5G10740
					AT5G53460					AT1G56280				AT1G79915
					AT4G03460					AT1G21130				AT2G24580
					AT1G67150					AT1G29690				AT1G05960
					AT4G18630					AT3G25620				AT1G47380
					AT1G12010					AT5G28830				AT3G61900
					AT3G09290					AT3G03440				AT1G74780
					AT5G53380					AT1G21450				AT3G47660
					AT1G02430					AT3G44880				AT3G27290
					AT2G44390					AT3G28890				AT3G16350
					AT3G53100					AT5G59730				AT5G48780
					AT5G26300					AT5G13810				AT3G08505
					AT1G66200					AT5G66210				AT2G13760
					AT2G40970					AT1G76150				AT3G29180
					AT5G43030					AT5G66900				AT1G71880
					AT5G45490					AT4G04620				AT1G27500
					AT2G04090					AT5G50570				AT2G16015
					AT4G26890					AT4G16955				AT3G51770
					AT3G26760					AT1G54710				AT1G79640
					AT5G02090					AT5G06320				AT1G48740
					AT5G12940					AT1G54570				AT4G38213
					AT2G36210					AT1G02305				AT4G20890
					AT1G16150					AT4G32150				AT3G60975
					AT4G30060					AT2G18170				AT5G43150
					AT5G44900					AT5G62770				AT4G33930
					AT1G30850					AT1G03940				AT1G79660
					AT2G31390					AT4G11570				AT5G44790
					AT5G24290					AT5G23750				AT3G06150
					AT5G01210					AT1G04970				AT5G18510
					AT5G19560					AT1G07640				AT3G24530
					AT1G50630					AT4G34920				AT1G15920
					AT1G27620					AT5G65300				AT5G15100
					AT4G38830					AT4G30470				AT3G09590
					AT3G26550					AT5G27520				AT3G11165
					AT3G15300					AT2G19710				AT3G61580
					AT2G28850					AT4G11000				AT5G62250
					AT5G04860					AT3G18690				AT1G09380
					AT5G40390					AT1G04780				AT1G58215
					AT1G28400					AT5G59420				AT3G50910
					AT1G60050					AT1G44770				AT2G03630
					AT1G48930					AT3G48390				AT2G18280
					AT4G27970					AT5G04220				AT1G10660
					AT5G23030					AT3G25020				AT3G59350
					AT1G71200					AT1G32928				AT1G54530
					AT5G37450					AT2G20920				AT3G12510
					AT2G18360					AT1G42990				AT2G44925
					AT3G47380					AT3G57450				AT3G13782
					AT5G14150					AT2G47600				AT1G80120
					AT4G30640					AT1G25275				AT1G35540
					AT1G47603					AT1G07040				AT1G11610
					AT4G18610					AT1G71140				AT1G22110
					AT5G59490					AT5G10180				AT2G16040
					AT5G51490									AT2G11570
					AT2G39180									AT1G67190
					AT1G72125									AT1G69850
					AT2G28860									AT2G40620
					AT3G54260									AT1G22200
					AT3G01760									AT3G51400
					AT1G50930									AT2G40090
					AT2G02310									AT4G10767
					AT2G38750									AT4G26330
					AT1G30370									AT3G07880
					AT1G49240									AT5G41990
					AT4G38140									AT1G45545
					AT1G79130									AT5G57830
					AT1G68940									AT5G26100
					AT4G13130									AT2G34770
					AT4G15960									AT2G46830
					AT2G20562									AT5G59030
					AT1G48640									AT1G74875
					AT4G26560									AT5G62310
					AT5G38610									AT3G59960
					AT5G45470									AT1G18750
					AT1G55290									AT5G41310
					AT1G17190									AT1G54290
					AT1G09780									AT1G44100
					AT1G05280									AT4G22590
					AT5G03960									AT3G08990
					AT1G60110									AT5G38895
					AT1G58400									AT1G18530
					AT4G12270									AT3G29255
					AT1G17300									AT1G64000
					AT5G45200									AT4G40100
					AT4G39700									AT1G09940
					AT5G51930									AT4G40010
					AT3G11370									AT1G22640
					AT4G19920									AT4G20703
					AT4G27290									AT5G53360
					AT5G60350									AT1G76490
					AT1G28680									AT1G22460
					AT5G41763									AT3G05580
					AT5G52670									AT2G26750
					AT3G23630									AT3G60040
					AT5G22355									AT3G04630
					AT5G55170									AT2G37610
					AT5G09890									AT4G32180
					AT4G15380									AT5G46910
					AT5G03260									AT2G43900
					AT1G28390									AT5G28010
					AT1G47271									AT1G06700
					AT1G64530									AT5G50930
					AT5G43400									AT4G21326
					AT5G10830									AT1G24330
					AT5G38010									AT2G01330
					AT3G49690									AT4G22270
					AT3G49330									AT2G36790
					AT3G15700									AT1G06890
					AT3G50150									AT1G58030
					AT1G10550									AT5G46115
					AT5G05160									AT5G22000
					AT3G27510									AT2G18560
					AT1G53310									AT2G32670
					AT1G30110									AT3G54690
					AT2G23560									AT4G20700
					AT3G56930									AT5G53030
					AT3G09280									AT1G15990
					AT1G63000									AT5G51460
					AT2G28690									AT3G05990
					AT3G45530									AT3G42075
					AT1G02440									AT3G01040
					AT2G35612									AT3G11900
					AT3G10720									AT3G01311
					AT1G35625									AT5G01800
					AT5G03510									AT5G16110
					AT4G35210									AT5G49890
					AT2G15760									AT3G18750
					AT2G31900									AT2G33190
					AT5G49680									AT2G19880
					AT3G59850									AT3G19230
					AT1G52140									AT3G55050
					AT3G53260									AT1G77150
					AT3G43430									AT3G51030
					AT3G03050									AT4G15120
					AT1G26360									AT1G53320
					AT5G51630									AT5G56270
					AT5G16900									AT4G24030
					AT5G35870									AT2G33350
					AT3G13600									AT1G69710
					AT4G26880									AT3G61560
					AT1G58190									AT1G08730
					AT1G69325									AT5G01640
					AT5G25010									AT5G60250
					AT1G77640									AT1G65840
					AT1G55940									AT5G13490
					AT5G05400									AT5G18150
					AT1G58370									AT2G15640
					AT1G48600									AT5G66300
					AT1G63295									AT3G51150
					AT5G52170									AT3G05550
					AT4G28720									AT5G58950
					AT1G62800									AT1G04090
					AT3G45410									AT1G26130
					AT2G01950									AT1G13130
					AT2G35810									AT3G21420
					AT3G11320									AT1G10385
					AT1G14390									AT5G56780
					AT1G06320									AT5G16020
					AT5G45220									AT3G03090
					AT1G73965									AT3G53070
					AT3G14370									AT1G22730
					AT4G36060									AT1G47870
					AT2G41310									AT2G46490
					AT1G16225									AT1G03610
					AT4G15093									AT4G35280
					AT1G64400									AT3G24760
					AT5G15900									AT2G33320
					AT1G18140									AT5G56340
					AT1G02810									AT1G77590
					AT1G64640									AT5G15470
					AT4G16920									AT1G76770
					AT5G50175									AT4G37770
					AT5G43690									AT1G73410
					AT3G19370									AT3G10290
					AT5G01830									AT4G28150
					AT5G40330									AT3G26940
					AT1G35580									AT2G42380
					AT5G55090									AT1G36050
					AT2G38320									AT3G58160
					AT1G16025									AT2G40790
					AT1G36060									AT3G10985
					AT2G30870									AT3G60540
					AT2G17420									AT4G33440
					AT1G21340									AT2G17180
					AT2G35610									AT3G10540
					AT3G22400									AT2G18270
					AT1G78990									AT3G51470
					AT2G40260									AT4G38010
					AT1G07520									AT2G18720
					AT4G25350									AT5G17300
					AT3G60490									AT1G70430
					AT4G08160									AT1G19110
					AT3G22850									AT4G34990
					AT1G06640									AT2G13547
					AT5G50120									AT1G23201
					AT3G16340									AT4G24026
					AT2G04500									AT4G35500
					AT2G39300									AT2G10920
					AT2G28890									AT2G14750
					AT2G12462									AT1G23210
					AT5G07870									AT1G50690
					AT1G51620									AT2G47490
					AT5G06300									AT2G43040
					AT2G26360									AT3G47730
					AT2G37040									AT5G35410
					AT2G41150									AT3G21945
					AT4G30980									AT4G02660
					AT5G35740									AT1G28960
					AT1G72360									AT4G19230
					AT5G14360									AT5G35715
					AT2G38760									AT3G47080
					AT1G29740									AT4G37840
					AT5G25830									AT3G24220
					AT2G04430									AT2G25290
					AT1G17890									AT4G14905
					AT4G23980									AT1G66300
					AT5G51160									AT3G20710
					AT4G26970									AT4G31020
					AT3G02780									AT3G26130
					AT4G04450									AT2G19340
					AT5G40100									AT3G13050
					AT5G07820									AT1G64584
					AT2G36890									AT5G18670
					AT2G47860									AT3G61590
					AT1G23480									AT1G68710
					AT4G20460									AT5G65890
					AT5G45440									AT4G13260
					AT4G12730									AT1G13900
					AT5G03630									AT4G15715
					AT4G22910									AT1G06430
					AT3G18780									AT4G13190
					AT1G55380									AT1G54920
					AT1G63220									AT1G01880
					AT2G30490									AT2G25880
					AT1G53340									AT4G22620
					AT4G24100									AT1G63640
					AT4G14305									AT1G15470
					AT3G49930									AT3G55730
					AT1G61795									AT3G13275
					AT1G10050									AT1G07410
					AT2G02020									AT5G51260
					AT1G66930									AT3G08790
					AT1G13950									AT3G09600
					AT1G64060									AT1G70040
					AT5G51670									AT3G18040
					AT2G24170									AT4G38260
					AT2G44300									AT1G30740
					AT4G27950									AT3G61760
					AT3G48100									AT3G22020
					AT4G06534									AT1G21695
					AT5G56040									AT5G52340
					AT5G41670									AT3G23610
					AT4G19720									AT1G19396
					AT1G16930									AT5G53700
					AT3G12820									AT3G11950
					AT3G07570									AT3G28917
					AT1G43790									AT3G21900
					AT1G51680									AT4G00720
					AT1G72140									AT1G14560
					AT1G08160									AT5G66830
					AT1G13830									AT5G39380
					AT5G37660									AT4G27840
					AT5G15650									AT3G12110
					AT3G58120									AT3G16175
					AT4G03330									AT4G11485
					AT3G06300									AT1G04985
					AT3G50190									AT3G12600
					AT1G20840									AT4G30860
					AT5G59070									AT4G26770
					AT1G04360									AT2G40330
					AT2G04780									AT5G60860
					AT1G14210									AT5G14470
					AT5G19340									AT1G04160
					AT4G12080									AT2G36660
					AT3G18170									AT5G54148
					AT1G03230									AT2G37070
					AT4G11230									AT3G30775
					AT5G42630
					AT1G79760
					AT5G65020
					AT1G07290
					AT2G18620
					AT4G14010
					AT3G49070
					AT2G04680
					AT1G31770
					AT4G38390
					AT5G40230
					AT4G36640
					AT1G13100
					AT1G03700
					AT1G23995
					AT5G61340
					AT1G31710
					AT4G06536
					AT5G53290
					AT4G08570
					AT5G50820
					AT2G40940
					AT2G32990
					AT5G16590
					AT1G20070
					AT3G53180
					AT2G41220
					AT1G57560
					AT1G67760
					AT1G58007
					AT1G21210
					AT1G64440
					AT4G31000
					AT1G05220
					AT3G59440
					AT5G63930
					AT3G53010
					AT3G52190
					AT2G36880
					AT5G11540
					AT1G11670
					AT2G28250
					AT3G12030
					AT5G53900
					AT4G03190
					AT2G37180
					AT1G19230
					AT1G63940
					AT4G27860
					AT1G21050
					AT3G18000
					AT2G17130
					AT1G79530
					AT1G19360
					AT3G55370
					AT1G44830
					AT1G70230
					AT5G19810
					AT1G77130
					AT4G30410
					AT3G51160
					AT4G37540
					AT5G27100
					AT1G58410
					AT1G01200
					AT1G64190
					AT1G33612
					AT3G45430
					AT1G53163
					AT1G70410
					AT1G70475
					AT1G07260
					AT4G31250
					AT5G07150
					AT3G61850
					AT5G57400
					AT4G02330
					AT1G25230
					AT3G20090
					AT4G08690
					AT5G62630
					AT5G47770
					AT4G12450
					AT5G46530
					AT4G33550
					AT1G24180
					AT5G37790
					AT3G01516
					AT3G28200
					AT5G36890
					AT5G41315
					AT5G26330
					AT5G22140
					AT4G12420

## Sheet: val1 val2 published DEGs
Upregulated genes						Downregulated genes
Gene ID	name	log2Folc Change	p value	FDR		Gene ID	name	log2Folc Change	p value	FDR
AT4G27160	AT2S3	19.053	6.86936e-188	8.53894e-185		AT1G25145	LPXC5	-9.15329	1.08291e-28	2.61501e-27
AT4G27150	AT2S2	18.6065	1.2658e-188	1.65212e-185		AT2G47880	GRXC13	-8.46488	4.6341e-31	1.26009e-29
AT1G47540		17.9836	2.76553e-164	2.88766e-161		AT3G29633		-8.0135	7.91398e-30	2.03133e-28
AT5G54740	SESA5	16.9913	1.51572e-144	1.01452e-141		AT2G42510		-7.47123	1.70627e-17	2.13113e-16
AT4G27170	AT2S4	16.5238	0	0		AT4G31940	CYP82C4	-7.35844	1.54027e-31	4.28647e-30
AT1G48130	PER1	15.4182	3.86771e-109	1.32846e-106		AT2G08730		-7.27909	1.88673e-16	2.187e-15
AT4G26740	PXG1	15.1113	8.23658e-105	2.5295e-102		AT5G10250	DOT3	-7.2043	5.1857e-16	5.77999e-15
AT4G30880		14.9479	1.23406e-99	3.2214e-97		AT2G24945		-7.06604	2.51467e-31	6.92436e-30
AT1G03890	CRD	14.9255	8.22941e-101	2.26127e-98		AT5G54148		-6.6024	1.25357e-12	1.0326e-11
AT1G17810	TIP3-2	14.8107	2.57522e-102	7.15143e-100		AT1G73910	ATARP4A	-6.27588	2.69293e-11	1.92698e-10
AT5G38160		14.5204	8.52569e-91	1.80939e-88		AT3G47580		-6.26708	4.85897e-24	9.11851e-23
AT3G63040		14.4097	2.85224e-90	6.00441e-88		AT4G26530	FBA5	-6.03649	1.0808e-37	4.04199e-36
AT3G54940	RD19D	14.3753	4.54955e-96	1.08956e-93		AT2G36540		-5.93765	7.34028e-18	9.42966e-17
AT2G15010		14.2471	2.96689e-67	3.04912e-65		ATCG00270	PSBD	-5.792	1.28737e-47	7.11979e-46
AT1G04560		14.2372	4.80646e-88	9.43366e-86		AT2G03710	AGL3	-5.62991	1.77626e-38	6.92053e-37
AT2G34870	MEE26	14.2148	1.65219e-106	5.19622e-104		AT5G27607		-5.61156	1.97508e-08	9.80739e-08
AT3G22640	PAP85	14.0268	2.81239e-131	1.56201e-128		AT5G03995		-5.43458	6.51323e-17	7.82787e-16
AT1G78500	PEN6	13.9363	2.766e-87	5.34842e-85		AT1G19510	RL5	-5.41928	1.3613e-15	1.46779e-14
AT5G50600	HSD1	13.899	4.53995e-89	9.25866e-87		AT3G28270		-5.41338	1.99906e-24	3.81459e-23
AT5G50700	HSD1	13.8031	1.96224e-87	3.82257e-85		ATCG00010	TRNH	-5.39368	1.39045e-75	1.87094e-73
AT4G03050	AOP3	13.7357	7.02339e-85	1.25574e-82		ATCG00030	TRNK	-5.37629	3.29097e-20	4.99172e-19
AT1G54860		13.5316	1.49487e-77	2.18e-75		ATCG00460	TRNM	-5.27224	2.52036e-41	1.09653e-39
AT5G38170		13.4107	1.20444e-74	1.56422e-72		AT1G22980		-5.21795	2.47978e-07	1.05273e-06
AT2G27380	EPR1	13.2834	1.07839e-78	1.6657e-76		AT2G04032	ZIP7	-5.2155	2.08756e-07	8.97017e-07
AT1G73190	TIP3-1	13.1935	3.13623e-59	2.64091e-57		AT5G04150	BHLH101	-5.19735	1.61699e-12	1.31783e-11
AT4G34520	FAE1	13.1717	2.87286e-73	3.5208e-71		AT1G02620		-5.13003	1.82476e-13	1.64084e-12
AT5G45690	OBAP2A	13.0417	7.34982e-68	7.67439e-66		ATCG00480	ATPB	-5.12998	1.06924e-29	2.72306e-28
AT5G22810		12.9932	5.17926e-73	6.28835e-71		AT2G45930		-5.08769	4.95236e-07	2.01146e-06
AT5G44360		12.9625	8.82355e-72	1.02826e-69		AT5G14110		-5.08386	5.67358e-26	1.18388e-24
AT5G62800		12.9448	1.08692e-70	1.22827e-68		ATCG00440	NDHC	-5.05917	2.12211e-46	1.11684e-44
AT2G44470	BGLU29	12.9371	1.13059e-69	1.23485e-67		AT1G53635		-5.0314	1.29676e-06	4.93953e-06
AT4G10850	SWEET7	12.918	2.26982e-70	2.52133e-68		AT5G38500		-5.02845	1.46881e-11	1.08341e-10
AT3G24250		12.8133	2.07043e-70	2.30968e-68		AT1G10790		-4.95483	1.73327e-06	6.4849e-06
AT3G26790	FUS3	12.7987	1.82758e-69	1.97137e-67		ATCG00470	ATPE	-4.95026	1.61118e-33	4.95386e-32
AT4G25140	OLEO1	12.7557	5.30511e-46	2.77524e-44		ATCG00280	PSBC	-4.94974	2.18166e-49	1.28555e-47
AT4G16160	OEP162	12.7222	1.15547e-102	3.27851e-100		ATCG00430	NDHK	-4.82844	1.22956e-34	3.93821e-33
AT2G34700		12.7019	2.56585e-213	4.7842e-210		ATCG01110	NDHH	-4.82567	3.38839e-55	2.48456e-53
AT2G18540		12.6798	3.81761e-70	4.22266e-68		ATCG00300	PSBZ	-4.8082	1.17378e-30	3.13615e-29
AT1G48990		12.5916	3.56435e-66	3.57861e-64		AT1G04323		-4.78912	1.17805e-07	5.25673e-07
AT2G23640	RTNLB13	12.5002	1.28707e-62	1.16658e-60		AT5G33355		-4.78295	3.25051e-08	1.56755e-07
AT4G33145		12.4497	4.36306e-100	1.15044e-97		ATCG00290	TRNS.2	-4.76552	5.52857e-36	1.90897e-34
AT4G21020		12.4056	8.04381e-134	4.66612e-131		ATCG01100	NDHA	-4.7305	4.72975e-29	1.1714e-27
AT5G24130		12.3849	1.97578e-64	1.90316e-62		AT5G38490		-4.71059	2.44578e-11	1.75832e-10
AT5G22470		12.341	9.89789e-64	9.3614e-62		AT5G26146		-4.70438	8.30232e-06	2.82745e-05
AT1G07645	ATDSI-1VOC	12.2762	7.21022e-59	5.9374e-57		ATCG00830	rpl2-A	-4.68086	3.24751e-36	1.13031e-34
AT1G56100		12.0729	2.0564e-58	1.67228e-56		AT1G61300		-4.66457	5.92367e-29	1.45879e-27
AT2G23510	SDT	12.0297	4.15957e-57	3.25094e-55		ATCG00330	RPS14	-4.65723	2.7203e-94	6.12161e-92
AT2G38905		12.0061	2.82085e-57	2.21127e-55		AT3G26235		-4.6553	1.20499e-05	4.01213e-05
AT3G21370	BGLU19	11.9344	1.11871e-97	2.78121e-95		AT5G23770	DUF8	-4.63978	1.08799e-13	9.98269e-13
AT4G35650	IDH3	11.9211	2.7743e-58	2.24212e-56		ATCG01300	RPL23-A	-4.63583	8.95793e-26	1.84998e-24
AT5G03820		11.9203	1.04488e-56	8.06969e-55		AT3G28290	AT14A	-4.63445	2.14688e-26	4.62012e-25
AT5G45880		11.8747	1.28248e-55	9.53786e-54		AT3G43400		-4.63386	1.30329e-05	4.30756e-05
AT5G55410		11.7688	7.50372e-82	1.23973e-79		AT1G05035		-4.61119	8.95044e-08	4.05911e-07
AT5G45980	WOX8	11.7417	7.93905e-54	5.55606e-52		AT5G23480		-4.6103	1.00546e-13	9.24498e-13
AT4G33820		11.731	3.49247e-147	2.39914e-144		AT4G01230	RTNLB7	-4.60647	1.85036e-05	5.97352e-05
AT1G27461		11.7133	5.37483e-54	3.77163e-52		AT4G19690	IRT1	-4.59967	8.92849e-06	3.02766e-05
AT5G55240	PXG2	11.7128	6.38042e-79	9.91395e-77		ATCG00840	RPL23-A	-4.57282	1.03945e-23	1.91623e-22
AT1G74140	RBL17	11.669	1.10351e-56	8.49736e-55		AT4G17180		-4.57152	3.48236e-44	1.71193e-42
AT5G51210	OL3	11.657	1.18616e-243	3.44038e-240		AT2G39240		-4.53911	1.67097e-05	5.42999e-05
AT1G77655		11.4893	9.42814e-51	5.90197e-49		AT5G15500		-4.53639	1.77293e-05	5.74271e-05
AT1G48800	TPS28	11.4102	3.03172e-90	6.33121e-88		AT5G06295		-4.5265	1.86991e-05	6.03291e-05
AT4G32500	AKT5	11.3513	1.40366e-50	8.68271e-49		AT2G31083	CLE5	-4.51937	1.68582e-08	8.43849e-08
AT1G03880	CRB	11.342	4.133e-34	1.29985e-32		AT4G20235	CYP71A28	-4.51838	7.27813e-09	3.82578e-08
AT5G07530	GRP17	11.3405	2.68352e-50	1.63288e-48		AT5G39420	cdc2cAt	-4.50991	8.59532e-07	3.37047e-06
AT4G39130		11.2784	1.53989e-49	9.13575e-48		ATCG01310	rpl2-A	-4.49934	4.05981e-41	1.73733e-39
AT3G21720	ICL	11.2723	0	0		ATCG00420	NDHJ	-4.49909	6.75859e-20	9.96759e-19
AT4G28365	ENODL3	11.2656	5.57845e-50	3.34758e-48		AT1G07050		-4.49508	3.34659e-20	5.07313e-19
AT3G24650	ABI3	11.2482	1.32891e-123	6.08595e-121		AT2G31540		-4.46884	2.82552e-05	8.847e-05
AT2G41225		11.2393	2.24792e-48	1.26465e-46		ATCG01000	YCF1.1	-4.45875	1.24762e-44	6.20341e-43
AT1G57800	VIM5	11.2155	2.17266e-45	1.11864e-43		AT5G45440		-4.45209	1.01528e-11	7.67979e-11
AT3G17520		11.0553	5.30508e-151	4.07306e-148		AT2G35075		-4.42523	3.65575e-08	1.75004e-07
AT2G33520		11.0516	3.67242e-45	1.87236e-43		AT5G60130		-4.42514	3.14414e-05	9.77172e-05
AT3G48270	CYP71A26	11.0399	1.45142e-45	7.50255e-44		ATCG01070	NDHE	-4.41678	9.11738e-22	1.51496e-20
AT3G54700	PHT1-7	11.0354	1.81519e-45	9.36436e-44		AT5G48980		-4.4123	8.82508e-06	2.99493e-05
AT4G15210	BAM5	11.0206	1.7795e-110	6.19361e-108		AT5G38450	CYP735A1	-4.39233	9.42016e-08	4.26103e-07
AT3G57620		11.0128	4.73432e-53	3.20167e-51		AT3G55040	GSTL2	-4.36095	3.16421e-28	7.48176e-27
AT5G07200	GA20OX3	10.9689	5.58752e-109	1.89424e-106		AT3G46880		-4.35654	4.38281e-05	0.000132771
AT4G10490	DLO2	10.9547	1.63886e-46	8.67763e-45		AT2G42370		-4.35615	8.12736e-06	2.77039e-05
AT4G31830		10.9455	8.08528e-84	1.39774e-81		AT1G10155	ATPP2-A10	-4.35013	5.85296e-05	0.000173521
AT3G16300		10.9213	3.28928e-161	3.06655e-158		AT1G48325		-4.32675	4.75428e-06	1.67915e-05
AT2G40220	ABI4	10.8728	2.7075e-45	1.38854e-43		AT1G30282		-4.30731	1.8229e-06	6.8027e-06
AT5G44310		10.8718	3.08448e-66	3.12083e-64		ATCG01090	NDHI	-4.30682	2.23157e-24	4.24275e-23
AT5G07550	GRP19	10.8599	1.01269e-125	4.8954e-123		AT1G68110		-4.29726	3.91011e-11	2.74602e-10
AT4G14080	A6	10.8404	9.89316e-45	4.92845e-43		AT5G46915		-4.27505	5.08864e-08	2.38609e-07
AT3G29385		10.8111	7.06451e-44	3.43411e-42		ATCG00820	RPS19	-4.26906	1.20832e-27	2.77414e-26
AT3G18570		10.7143	1.75215e-70	1.96301e-68		AT4G10510	SBT3.7	-4.26197	1.13191e-07	5.0612e-07
AT1G72570	AIL1	10.7049	7.4329e-43	3.45861e-41		AT1G07550		-4.24859	1.94981e-07	8.41289e-07
AT1G25410	IPT6	10.6935	2.48807e-42	1.13745e-40		AT1G66100		-4.23645	4.97936e-20	7.45732e-19
AT1G28640		10.6881	1.59762e-41	7.04464e-40		AT5G63160	BT1	-4.17428	3.14694e-16	3.57631e-15
AT2G05580		10.6772	2.45158e-34	7.78539e-33		AT1G03340		-4.14611	1.26605e-09	7.29236e-09
AT3G12203	SCPL17	10.6173	9.22219e-101	2.50767e-98		ATCG01010	NDHF	-4.10034	2.25059e-68	2.37852e-66
AT5G63085		10.6019	2.79144e-40	1.16402e-38		ATCG00450	TRNV.1	-4.09474	1.6458e-27	3.75871e-26
AT3G58450		10.5862	1.50197e-39	6.12617e-38		AT2G36590	PROT3	-4.09277	2.351e-18	3.12477e-17
AT4G27140	AT2S1	10.5858	1.45137e-28	3.48864e-27		AT5G49730	FRO6	-4.07911	5.29743e-28	1.23799e-26
AT5G38180		10.5837	6.12823e-41	2.59273e-39		AT2G33750	PUP2	-4.07825	9.87287e-07	3.83457e-06
AT1G75830	PDF1.1	10.576	1.20226e-35	4.0811e-34		AT1G05540		-4.07512	4.22075e-20	6.33573e-19
AT1G71470		10.5645	4.07531e-41	1.74111e-39		AT5G59260	LECRK21	-4.06545	2.60153e-11	1.86567e-10
AT4G27550	TPS4	10.5585	1.57449e-41	6.96619e-40		AT1G51538		-4.06257	0.000180434	0.000488391
AT5G44120	CRA1	10.5536	2.67562e-30	6.99844e-29		AT3G28917	MIF2	-4.05147	0.000204338	0.000547982
AT4G32490	ENODL4	10.5336	1.2341e-42	5.69169e-41		AT5G44590		-4.04507	0.000338365	0.000870902
AT5G66430		10.5122	9.03289e-40	3.69584e-38		AT5G38820		-4.03842	1.19267e-10	7.90792e-10
AT2G36640	ECP63	10.4307	2.1435e-148	1.55427e-145		AT5G62240		-4.03098	0.000203344	0.000545594
AT5G07190	ATS3	10.4289	1.0153e-208	1.76689e-205		AT1G55673		-4.02469	4.53175e-05	0.000136949
AT3G56350	MSD2	10.4142	5.71503e-29	1.40874e-27		AT5G45150	RTL3	-4.02175	2.64535e-06	9.6512e-06
AT1G21529		10.4076	4.82411e-37	1.73455e-35		AT5G23240	DJC76	-4.00315	7.83831e-68	8.15185e-66
AT3G25160		10.3847	6.56056e-38	2.47481e-36		AT5G47450	TIP2-3	-3.9988	2.31946e-43	1.09687e-41
AT5G50770	HSD6	10.3642	4.85832e-87	9.32511e-85		AT3G13840	SCL29	-3.99419	0.000245862	0.000650291
AT3G25280	NPF4.2	10.3543	4.88683e-41	2.08441e-39		AT5G38970	CYP85A1	-3.9924	4.32619e-26	9.10733e-25
AT1G03106		10.3316	5.6059e-118	2.25133e-115		AT4G06115		-3.98241	0.000315567	0.000817068
AT5G07330		10.3025	5.83115e-40	2.4123e-38		AT1G30280		-3.94762	8.76653e-13	7.36282e-12
AT3G01570		10.2842	1.68049e-217	3.37442e-214		ATCG00810	RPL22	-3.91585	4.19728e-27	9.37261e-26
AT5G01300		10.2829	8.16602e-133	4.63404e-130		AT1G04313		-3.9113	3.02833e-06	1.09611e-05
AT5G52160		10.2793	1.23668e-36	4.3507e-35		AT1G61310		-3.89822	5.20771e-11	3.60111e-10
AT4G31900	CHR7	10.2537	5.46267e-76	7.58497e-74		AT2G28160	FIT	-3.88918	2.6137e-34	8.29017e-33
AT2G41360		10.2035	3.18426e-38	1.22418e-36		AT3G11920		-3.88488	0.000420354	0.0010642
AT1G32710		10.1972	6.03783e-36	2.07931e-34		ATCG01120	RPS15	-3.86773	8.60464e-30	2.19995e-28
AT1G22100		10.1918	1.05488e-36	3.73123e-35		ATCG00760	RPL36	-3.86722	9.12664e-26	1.88333e-24
AT3G25810	TPS24	10.1626	7.44128e-36	2.54584e-34		AT3G43740		-3.86567	1.6067e-47	8.8671e-46
AT3G58740	CSY1	10.1622	2.40717e-37	8.8254e-36		AT4G12917		-3.86345	7.77049e-21	1.22046e-19
AT3G51810	EM1	10.1556	5.09755e-37	1.82784e-35		AT3G44790		-3.86243	0.000462597	0.00116139
AT3G23167	LCR39	10.1539	2.04587e-36	7.18781e-35		AT1G67865		-3.86008	8.27986e-11	5.59362e-10
AT3G60420		10.1463	2.03312e-37	7.50671e-36		AT1G23935		-3.84527	1.07199e-26	2.34956e-25
AT5G57380	VIN3	10.1246	1.98709e-38	7.696e-37		AT1G70820		-3.83232	1.73154e-15	1.84943e-14
AT5G16460	SEI1	10.1107	2.80349e-36	9.77068e-35		AT2G45660	SOC1	-3.82982	4.05813e-18	5.30994e-17
AT1G52690	LEA7	10.0927	2.76334e-157	2.32691e-154		AT2G32290	BAM6	-3.82411	8.52977e-13	7.17105e-12
AT1G02790	PGA3	10.0844	9.68319e-38	3.62654e-36		AT4G18960	AG	-3.82342	0.000524559	0.00130522
AT1G22015	B3GALT5	10.0821	2.04983e-35	6.8689e-34		AT1G31690		-3.8183	5.13617e-20	7.68335e-19
AT3G28415	ABCB22	10.0652	1.67885e-37	6.21628e-36		AT4G04455		-3.81586	0.000800798	0.00192966
AT2G38900		10.0565	9.38325e-34	2.90903e-32		AT4G04330	RBCX1	-3.81541	1.27178e-20	1.9761e-19
AT4G33885		10.0329	2.25398e-35	7.54332e-34		AT4G25560	LAF1	-3.81524	1.07632e-05	3.60717e-05
AT5G44220		10.0262	1.93317e-35	6.50303e-34		ATCG00750	RPS11	-3.814	1.17868e-26	2.5769e-25
AT4G28090	sks10	10.0249	2.79828e-35	9.29344e-34		AT5G24215		-3.81279	2.77925e-05	8.70881e-05
AT5G40560	DEGP13	10.0239	4.40794e-35	1.44373e-33		AT1G61950	CPK19	-3.80897	9.82276e-06	3.31069e-05
AT3G58415		9.99154	4.63483e-35	1.51424e-33		AT1G52920	GCR2	-3.80549	6.76597e-06	2.33561e-05
AT1G21970	NFYB9	9.91488	3.37951e-36	1.17468e-34		AT4G12830		-3.8022	1.06564e-28	2.58286e-27
AT1G62410		9.90384	3.58459e-34	1.13147e-32		AT3G43790	ZIFL2	-3.77318	4.31198e-26	9.08474e-25
AT2G19770	PRO4	9.88799	1.55583e-34	4.95285e-33		AT3G57770		-3.76903	1.95788e-28	4.67171e-27
AT5G56510	APUM12	9.86727	3.98483e-34	1.25476e-32		AT4G13570	HTA4	-3.76241	3.18471e-05	9.88509e-05
AT5G59310	LTP4	9.8659	2.16298e-120	9.25613e-118		ATCG00800	RPS3	-3.75886	2.65695e-33	8.07415e-32
AT3G29970		9.84011	2.09131e-32	6.09282e-31		ATCG01130	YCF1.2	-3.75705	4.09122e-39	1.63549e-37
AT4G09940		9.83143	8.66142e-63	7.90552e-61		AT1G27610		-3.75295	0.000696625	0.00169697
AT1G10680	ABCB10	9.81614	1.29372e-175	1.46832e-172		ATCG00770	RPS8	-3.74976	1.18512e-31	3.33727e-30
AT5G27200	ACP5	9.77083	1.03996e-120	4.5245e-118		AT5G03390		-3.74374	2.33651e-34	7.42902e-33
AT3G15280		9.7449	8.72339e-34	2.7109e-32		AT1G49920		-3.74259	0.000813787	0.00195753
AT1G60570		9.69948	1.56629e-33	4.8215e-32		AT5G62040	BFT	-3.73497	5.5492e-05	0.00016521
AT3G27660	OL2	9.66828	1.2455e-192	2.03204e-189		ATCG01080	NDHG	-3.73113	9.14131e-23	1.60907e-21
AT1G77950	AGL67	9.65868	3.02518e-65	2.95765e-63		AT5G03695		-3.7273	0.000861334	0.00206108
AT2G42560		9.64139	1.00806e-36	3.57046e-35		AT3G24065		-3.72128	0.000810128	0.00194975
AT3G28360	ABCB16	9.64022	9.74205e-32	2.7582e-30		AT5G49150	ATGEX2	-3.71251	0.000452307	0.0011377
AT3G53040		9.62349	2.26237e-97	5.51933e-95		AT5G51795	KLP	-3.71214	7.97285e-05	0.000230301
AT5G08695		9.622	9.06648e-33	2.69557e-31		AT4G13564	MIR841A	-3.71088	0.000827215	0.00198745
AT3G21880		9.62189	1.47675e-29	3.74264e-28		AT5G19190		-3.70979	1.1781e-11	8.83457e-11
AT2G27240	ALMT7	9.61851	1.76208e-31	4.88813e-30		AT2G18328	RL4	-3.70754	3.40661e-31	9.34097e-30
AT5G65165	SDH2-3	9.5944	1.33211e-104	4.04341e-102		AT1G06177		-3.69776	0.000968116	0.0022968
AT3G29260	SDR5	9.57621	2.18858e-32	6.36909e-31		AT3G14467		-3.68187	0.00102156	0.00241547
AT5G08030		9.5612	3.47639e-33	1.05154e-31		ATCG00400	TRNL.1	-3.68141	5.86225e-43	2.73754e-41
AT5G55800		9.55019	1.05145e-31	2.96724e-30		AT2G33790	AGP30	-3.66203	1.00325e-13	9.22793e-13
AT1G66360	CAR2	9.54524	4.11327e-32	1.18513e-30		AT3G62550		-3.66114	5.81549e-15	5.91611e-14
AT1G06990		9.53465	1.07693e-29	2.73998e-28		AT1G43020		-3.65819	3.53582e-12	2.78849e-11
AT1G19460		9.52794	9.87917e-32	2.794e-30		AT5G62165	AGL42	-3.65692	1.01099e-06	3.91615e-06
AT1G80090	PV42B	9.49877	7.79386e-53	5.25713e-51		ATCG00740	RPOA	-3.65615	1.66126e-26	3.60477e-25
AT2G18460	LCV3	9.47553	1.67511e-31	4.65678e-30		AT3G28770		-3.65125	2.13382e-17	2.64866e-16
AT5G09550		9.442	4.07138e-31	1.11055e-29		ATCG00390	TRNT.2	-3.64288	2.34597e-41	1.02407e-39
AT3G49300		9.40942	8.66228e-29	2.10933e-27		AT4G38775		-3.63528	2.10503e-06	7.77995e-06
AT1G61800	GPT2	9.40679	1.3064e-64	1.26305e-62		AT5G65340		-3.63237	0.000307564	0.000798235
AT3G15670	LEA29	9.38792	2.58316e-26	5.53164e-25		AT4G19530		-3.61871	6.41449e-14	5.99942e-13
AT4G09600	GASA3	9.37293	7.29804e-22	1.22042e-20		AT1G78440	GA2OX1	-3.61856	0.00116991	0.002736
AT5G35660		9.35762	5.83024e-31	1.57713e-29		AT1G20400		-3.6184	5.52579e-05	0.000164551
AT2G21720		9.34851	2.82715e-48	1.58709e-46		AT5G23580	CPK12	-3.61795	1.90202e-25	3.84803e-24
AT1G52695		9.3457	2.41222e-30	6.32849e-29		AT5G23230	NIC2	-3.61475	0.000923274	0.0021968
AT2G02990	RNS1	9.30936	1.42222e-72	1.70301e-70		AT5G58360	OFP3	-3.59651	4.48178e-05	0.000135549
AT1G20925	PILS1	9.29148	8.8208e-76	1.19926e-73		AT3G13850	LBD22	-3.59439	0.00141283	0.00324767
AT1G27990		9.29129	1.95783e-29	4.94268e-28		ATCG00550	PSBJ	-3.59435	3.31789e-14	3.17719e-13
AT3G01125		9.28988	6.6161e-29	1.62318e-27		AT4G13575		-3.58635	1.89664e-13	1.70196e-12
AT5G07510	GRP14	9.28606	3.12752e-28	7.4017e-27		AT2G05995		-3.57913	0.00132304	0.00305877
AT3G49340		9.26729	1.24662e-28	3.002e-27		AT2G04780	FLA7	-3.57714	1.29987e-26	2.8371e-25
AT1G71691		9.26268	1.29771e-150	9.67871e-148		AT1G68940		-3.57169	1.69439e-06	6.34762e-06
AT1G48470	GLN1-5	9.24505	3.23794e-123	1.43259e-120		AT1G75960	AAE8	-3.56558	2.9567e-27	6.66509e-26
AT4G04760		9.21093	5.49271e-75	7.20511e-73		AT1G76770		-3.55895	0.00154572	0.00352521
AT5G07500	TZF6	9.20559	3.07398e-74	3.9143e-72		AT1G76530	PILS4	-3.55866	6.04914e-05	0.000178648
AT3G61340		9.19144	4.04469e-29	1.00459e-27		AT4G32990		-3.55113	2.4689e-07	1.04828e-06
AT3G14040		9.17683	6.05805e-28	1.4107e-26		AT1G10980		-3.5467	0.00160558	0.0036493
AT4G13700	ATPAP23	9.16425	1.05401e-28	2.55705e-27		AT1G32450	NPF7.3	-3.53574	2.47221e-22	4.26252e-21
AT1G77100	PER13	9.16199	2.9921e-29	7.47423e-28		AT2G15080	AtRLP19	-3.52471	1.48339e-09	8.46208e-09
AT1G14950		9.10447	1.27076e-27	2.91492e-26		AT3G55630	FPGS3	-3.52217	5.63981e-11	3.88653e-10
AT3G58410		9.07197	4.37944e-28	1.02807e-26		AT1G36070		-3.50999	6.76363e-39	2.67512e-37
AT5G58460	CHX25	9.03814	4.04677e-27	9.04992e-26		ATCG01250	NDHB.2	-3.50964	1.27283e-37	4.73978e-36
AT3G57510	ADPG1	9.03248	5.45484e-27	1.2098e-25		AT2G22980	SCPL13	-3.50762	7.36266e-10	4.37502e-09
AT1G74990		9.02981	5.85167e-26	1.21909e-24		AT3G58480	IQM6	-3.50688	0.00176875	0.00398716
AT4G10020	HSD5	9.0292	1.71755e-119	7.11666e-117		AT5G62360		-3.49588	1.66e-11	1.21926e-10
AT2G28490		9.01703	1.48736e-19	2.14271e-18		AT1G47265		-3.49569	0.00187427	0.00420723
AT3G58210		8.98883	2.95194e-27	6.6629e-26		AT5G56490	GULLO4	-3.49281	3.62361e-06	1.29879e-05
AT5G20310		8.98511	2.46587e-26	5.28917e-25		AT1G12320		-3.48911	1.41638e-09	8.10285e-09
AT1G80133	EPFL8	8.97389	3.19426e-26	6.80678e-25		AT2G07475		-3.46972	8.82608e-07	3.45111e-06
AT1G32560	LEA6	8.96271	5.53455e-165	6.01974e-162		AT3G01440	PNSL3	-3.46743	1.13002e-14	1.12502e-13
AT1G69930	GSTU11	8.95414	3.53232e-45	1.80446e-43		AT3G01500	BCA1	-3.46705	1.054e-10	7.03133e-10
AT1G56170	NFYC2	8.94799	3.81833e-62	3.42521e-60		AT2G44810	DAD1	-3.45939	0.00232369	0.00511534
AT1G65090		8.94482	1.5853e-19	2.27753e-18		AT5G67420	LBD37	-3.45865	5.34889e-19	7.37599e-18
AT1G12064		8.92544	2.75597e-23	4.97868e-22		AT2G39850	SBT4.1	-3.45154	3.37735e-08	1.62571e-07
AT5G10220	ANN6	8.91413	1.92151e-72	2.29037e-70		AT1G26540	DUF3	-3.44898	3.46927e-16	3.92383e-15
AT3G58400		8.91057	1.55269e-26	3.38044e-25		AT2G18300		-3.44676	4.29431e-13	3.72916e-12
AT2G30770	CYP71A13	8.90547	8.61677e-71	9.78944e-69		AT3G32047		-3.43954	0.000157237	0.000430018
AT5G04500		8.85326	1.3817e-46	7.33085e-45		AT5G10946		-3.43695	1.04203e-07	4.68308e-07
AT2G34315		8.84738	2.56968e-25	5.14409e-24		ATCG01030	TRNL.3	-3.43635	0.00224427	0.00495931
AT3G28510		8.81864	8.30277e-27	1.82745e-25		AT4G17460	HAT1	-3.43239	4.20241e-19	5.84131e-18
AT4G31540	ATEXO70G1	8.81623	7.1469e-52	4.61789e-50		AT1G66460		-3.42914	1.13943e-05	3.8084e-05
AT5G24860	FPF1	8.80691	2.07564e-37	7.65291e-36		ATCG00340	PSAB	-3.42894	6.80568e-20	1.00314e-18
AT1G70260		8.80478	2.58515e-72	3.05351e-70		AT5G13730	SIGD	-3.40343	6.43128e-09	3.40462e-08
AT3G44830	PDAT2	8.79431	5.39123e-41	2.2958e-39		AT5G26300		-3.40014	0.00269328	0.00586024
AT1G04660		8.79388	0	0		AT3G29280		-3.3915	1.18773e-29	3.016e-28
AT1G68250		8.77866	3.01416e-20	4.58689e-19		AT2G20880	ERF053	-3.39103	1.53168e-06	5.77206e-06
AT5G01900	WRKY62	8.77552	1.00505e-25	2.06745e-24		AT5G03615		-3.36304	3.42509e-10	2.12574e-09
AT1G05510	OBAP1A	8.77254	8.03831e-19	1.09401e-17		AT1G49490		-3.3624	1.25966e-17	1.58851e-16
AT4G18920	OBAP2B	8.76728	3.62706e-37	1.31501e-35		AT3G18550	BRC1	-3.36183	0.00288084	0.0062351
AT3G05300		8.74169	4.86992e-38	1.84774e-36		AT1G65480	FT	-3.35823	0.000566806	0.00140352
AT2G39030	NATA1	8.73124	4.6727e-43	2.19382e-41		AT5G54585		-3.35222	1.10086e-09	6.38169e-09
AT1G29100		8.71612	5.5694e-23	9.93057e-22		AT1G26290		-3.34518	0.00359067	0.00761915
AT4G36700		8.71573	1.82768e-30	4.83873e-29		AT2G31250	HEMA3	-3.34326	1.41973e-05	4.66524e-05
AT2G21490	LEA	8.7045	3.20022e-24	6.04476e-23		ATCG00020	PSBA	-3.33652	3.70942e-142	2.30549e-139
AT5G27370	DMP10	8.66898	1.08317e-23	1.99145e-22		AT2G32740	GT13	-3.33457	0.000232318	0.000617434
AT4G26466	LRE	8.641	1.84268e-24	3.5265e-23		AT2G01918	PQL3	-3.3327	4.74221e-07	1.93181e-06
AT2G20430	RIC6	8.60267	8.41271e-24	1.56192e-22		ATCG00040	MATK	-3.32941	6.20329e-32	1.77556e-30
AT2G02120	PDF2.1	8.59015	1.67427e-70	1.88385e-68		AT1G62690		-3.32872	0.00320857	0.00687205
AT5G05340	PER52	8.58957	2.69049e-42	1.2257e-40		AT2G39040	PER24	-3.32866	3.72768e-32	1.0776e-30
AT4G39610		8.58423	5.01262e-24	9.39168e-23		AT4G17340	TIP2-2	-3.31981	2.56676e-20	3.91829e-19
AT2G33690		8.57244	5.6006e-23	9.97258e-22		AT4G03930	PME42	-3.31858	1.47227e-05	4.82817e-05
AT5G46540	ABCB7	8.56833	5.34761e-24	9.99958e-23		AT5G20250	DIN10	-3.31469	8.40143e-15	8.44804e-14
AT1G20860	PHT1	8.51689	1.09485e-52	7.32818e-51		ATCG00090	TRNS.1	-3.30813	3.11001e-19	4.36942e-18
AT1G30170		8.49518	1.431e-23	2.61222e-22		AT1G06100		-3.29602	2.56341e-10	1.62376e-09
AT1G62710	bVPE	8.48285	7.86143e-138	4.66397e-135		AT3G52070		-3.28936	0.0010377	0.00245164
AT5G56368		8.47517	3.14088e-22	5.38696e-21		AT1G15550	GA3OX1	-3.28888	3.3386e-05	0.000103357
AT1G64795		8.46753	9.40227e-37	3.34383e-35		AT3G29670	PMAT2	-3.28772	1.64998e-14	1.61983e-13
AT5G03795		8.45178	5.91712e-192	8.58113e-189		ATCG01020	RPL32	-3.26931	4.12466e-44	2.02008e-42
AT5G06760	LEA46	8.44309	2.35676e-80	3.79758e-78		AT5G45050	RRS1B	-3.26366	2.42797e-12	1.94596e-11
AT1G60090	BGLU4	8.4351	3.74644e-23	6.73998e-22		AT5G44680		-3.25943	2.24077e-22	3.87371e-21
AT1G14940		8.43212	4.71539e-23	8.43665e-22		AT3G43540		-3.25773	2.91174e-10	1.8258e-09
AT4G28520	CRC	8.42392	1.31597e-16	1.546e-15		AT4G28485	DMP7	-3.24906	0.00418442	0.0087412
AT1G78760		8.41537	3.26619e-54	2.32318e-52		AT5G02515		-3.24713	9.28341e-11	6.22167e-10
AT3G07255		8.39846	4.63146e-48	2.58332e-46		ATCG00080	PSBI	-3.23949	9.20245e-21	1.44104e-19
AT1G02770		8.395	2.26713e-142	1.47953e-139		AT1G12030		-3.23227	8.28918e-11	5.59753e-10
AT3G60730	PME36	8.38509	3.99911e-83	6.82305e-81		AT4G12360		-3.23161	0.0047081	0.00971928
AT1G67100	LBD40	8.3807	1.65543e-20	2.55548e-19		AT3G26125	CYP86C2	-3.22784	0.00135321	0.00312245
AT5G18450	DREB2G	8.32501	9.92069e-22	1.64425e-20		ATCG00650	RPS18	-3.22686	5.74537e-26	1.1979e-24
AT3G07620		8.31888	4.66533e-20	6.99906e-19		AT3G18773	ATL77	-3.22442	8.74553e-36	2.98423e-34
AT5G24560	AtPP2-B12	8.31115	1.02352e-21	1.69423e-20		AT1G32080	PLGG1	-3.22299	3.72607e-13	3.25956e-12
AT4G32100		8.30555	1.51262e-21	2.48493e-20		AT5G45040	PETJ	-3.21587	2.09744e-11	1.52299e-10
AT4G12500		8.30534	1.2589e-162	1.26393e-159		AT5G01017		-3.21442	0.00465682	0.00962178
AT2G18590		8.30063	4.53445e-21	7.23074e-20		AT1G26610		-3.21417	0.000465963	0.00116878
AT5G17810	WOX12	8.29225	9.09685e-127	4.65616e-124		AT1G20020	LFNR2	-3.21072	3.7842e-14	3.60653e-13
AT4G18680		8.28283	1.74986e-26	3.78445e-25		AT3G45430	LECRK15	-3.20764	7.38907e-22	1.23485e-20
AT4G12210		8.27499	1.55049e-21	2.54234e-20		AT3G04255		-3.20376	1.14475e-10	7.6076e-10
AT1G65880	AAE20	8.27019	8.62539e-71	9.78944e-69		AT3G20557	VUP3	-3.20351	0.000545848	0.00135522
AT2G33070	NSP2	8.25178	2.97486e-94	6.63724e-92		ATCG00490	RBCL	-3.20203	2.04184e-35	6.85093e-34
AT1G08893		8.21906	1.25957e-24	2.42834e-23		AT5G50760		-3.19661	1.06504e-108	3.51922e-106
AT3G27415		8.21496	8.33856e-39	3.28806e-37		AT3G06950		-3.19556	6.23607e-26	1.29504e-24
AT2G44800		8.21189	2.70171e-55	1.99789e-53		AT5G45060	RPS4B	-3.19514	4.45856e-23	7.98807e-22
AT5G07480	KUOX1	8.20915	3.61922e-20	5.46737e-19		AT5G38420	RBCS-2B	-3.19479	2.54407e-05	8.02447e-05
AT5G47670	NFYB6	8.20414	3.46567e-88	6.90594e-86		AT3G29780	RALFL27	-3.18952	1.1782e-15	1.27617e-14
AT5G24950	CYP71A15	8.19909	4.61755e-21	7.35427e-20		AT3G06070		-3.18022	2.90263e-13	2.56848e-12
AT3G20210	dVPE	8.18289	4.0363e-51	2.56984e-49		AT4G22510		-3.17908	5.0346e-05	0.000150992
AT4G22100	BGLU3	8.16813	3.37923e-20	5.11667e-19		AT5G52310	RD29A	-3.17859	7.48143e-21	1.17719e-19
AT2G40170	EM6	8.15912	4.28355e-30	1.11151e-28		AT4G17970	ALMT12	-3.17224	3.25972e-20	4.94719e-19
AT3G49770		8.1554	1.19006e-20	1.85354e-19		AT3G62950	GRXC11	-3.16892	9.08037e-08	4.11517e-07
AT5G45830	DOG1	8.14909	3.96987e-70	4.37255e-68		AT3G09240		-3.1647	2.67397e-15	2.79989e-14
AT1G11370	PME56	8.14888	1.96536e-54	1.41723e-52		AT1G08697		-3.1587	3.68995e-05	0.000113334
AT4G11040		8.14867	2.22717e-21	3.62005e-20		AT1G52190	NPF1.2	-3.15765	0.000114719	0.000321104
AT4G37435		8.14406	1.083e-21	1.79041e-20		AT4G07195		-3.1568	0.000695294	0.00169404
AT4G15200	AFH3	8.14295	1.00309e-21	1.66146e-20		AT1G16225		-3.15651	0.00596446	0.0120719
AT2G05655		8.13966	2.52111e-39	1.02033e-37		AT3G24518		-3.15368	1.09125e-07	4.88861e-07
AT2G47115		8.12653	3.89192e-20	5.87253e-19		AT5G01740		-3.14746	3.01688e-13	2.66057e-12
AT4G21895		8.12544	2.24413e-20	3.4338e-19		AT3G59940	SKIP20	-3.14737	9.67417e-12	7.34019e-11
AT3G54510		8.11973	6.15332e-56	4.629e-54		ATCG00790	RPL16	-3.14435	1.18425e-21	1.95162e-20
AT2G47120		8.11356	7.52928e-19	1.02688e-17		AT2G04190		-3.14291	0.00622411	0.0125472
AT5G54000		8.10117	5.11463e-21	8.11132e-20		AT5G08600		-3.14259	8.11723e-28	1.87349e-26
AT4G16740	TPS03	8.09906	2.40833e-18	3.19609e-17		AT5G04065		-3.14175	0.00116681	0.00272973
AT2G25340	VAMP712	8.09853	1.04743e-20	1.63627e-19		ATCG00780	RPL14	-3.14076	1.53827e-20	2.37744e-19
AT2G35300	LEA18	8.0925	9.07107e-83	1.5376e-80		AT1G01980	SEC1A	-3.13649	0.0061589	0.0124283
AT2G23230		8.08333	1.86987e-20	2.87632e-19		AT3G52510		-3.13649	0.0061589	0.0124283
AT5G54560		8.068	2.74619e-23	4.96445e-22		AT5G08725		-3.13649	0.0061589	0.0124283
AT2G42465		8.0502	1.98196e-20	3.04156e-19		ATCG00350	PSAA	-3.12852	7.60796e-59	6.24523e-57
AT4G23150	CRK7	8.0139	1.02111e-43	4.9179e-42		AT2G05825		-3.12821	0.000102772	0.000290815
AT3G58060	MTPC3	7.9941	1.32739e-77	1.94664e-75		ATCG00890	NDHB.1	-3.12355	0.00322456	0.00690289
AT4G31970	CYP82C2	7.98826	2.90307e-19	4.09409e-18		AT5G45220		-3.12243	8.00937e-12	6.14389e-11
AT1G63340		7.97954	6.52588e-20	9.64072e-19		AT5G38930		-3.12118	0.00166885	0.00378027
AT4G09930	IAN11	7.96811	1.91869e-20	2.94968e-19		AT1G04047		-3.12112	7.15158e-07	2.83629e-06
AT5G66780		7.95751	2.07843e-44	1.02562e-42		AT5G38120	4CLL8	-3.11675	0.00675774	0.0135269
AT2G20825	ULT2	7.93694	3.22018e-29	8.03629e-28		ATCG00530	CEMA	-3.11439	5.17521e-12	4.02544e-11
AT5G55750		7.90745	4.85292e-27	1.08089e-25		AT1G14790	RDR1	-3.11142	1.59455e-41	7.04301e-40
AT2G18340		7.89838	4.37951e-64	4.15719e-62		AT2G13360	AGT1	-3.11034	1.24382e-10	8.2137e-10
AT2G05330		7.89436	7.824e-76	1.06931e-73		AT1G51440		-3.10999	7.39432e-08	3.39647e-07
AT1G11572		7.88012	1.97154e-19	2.81077e-18		AT3G48360	BT2	-3.10768	1.9549e-10	1.26033e-09
AT2G04070	DTX4	7.87854	1.81567e-19	2.59421e-18		AT4G13310	CYP71A20	-3.10471	6.27683e-09	3.33029e-08
AT3G50090	SDN4	7.87415	5.58438e-19	7.68854e-18		AT3G59250		-3.09712	2.99826e-16	3.41925e-15
AT3G19530		7.86819	1.34078e-18	1.80504e-17		AT4G28140	ERF054	-3.09139	9.63545e-10	5.62945e-09
AT2G19320		7.83046	2.00861e-17	2.4968e-16		AT3G15570		-3.08838	1.41515e-11	1.04619e-10
AT1G28650		7.8016	3.63395e-38	1.38888e-36		AT2G18480	PLT3	-3.08567	2.51018e-09	1.38796e-08
AT1G68290	ENDO2	7.79538	3.50496e-78	5.31939e-76		AT5G27810		-3.08548	0.00302287	0.00651173
AT5G45180	FMO2	7.77056	1.44817e-31	4.0431e-30		AT1G67710	ARR11	-3.08493	1.98609e-15	2.11095e-14
AT5G43000		7.76371	8.20215e-15	8.26356e-14		AT2G33830	DRMH1	-3.08347	7.26172e-11	4.93517e-10
AT5G40420	OLEO2	7.75882	5.23817e-14	4.93636e-13		AT1G44030		-3.08318	0.00717891	0.0142899
AT5G17340		7.75875	4.60666e-33	1.3838e-31		ATCG00380	RPS4	-3.07703	2.39176e-19	3.38765e-18
AT5G26805		7.74724	8.94236e-19	1.21389e-17		AT4G00110	GAE3	-3.0752	2.57459e-65	2.52658e-63
AT5G62490	HVA22B	7.74239	7.0133e-49	4.03249e-47		AT2G25780		-3.07316	4.03506e-11	2.82692e-10
AT3G57260	BGL2	7.7308	7.77144e-20	1.14226e-18		AT5G46845	MIR160C	-3.07215	3.84383e-05	0.000117617
AT1G31510		7.73002	2.51518e-17	3.09992e-16		AT4G10160	ATL59	-3.06776	3.38075e-05	0.000104513
AT1G73220	2025-10-01	7.71962	1.29714e-67	1.33837e-65		AT5G18730		-3.06327	1.17603e-05	3.91968e-05
AT1G64584		7.70824	3.28809e-18	4.34154e-17		AT5G45530		-3.06283	3.42637e-06	1.2308e-05
AT1G48910	YUC10	7.70643	5.74649e-17	6.93832e-16		AT3G51070		-3.05978	0.00792786	0.0156365
AT3G22840	ELIP1	7.69627	2.75858e-54	1.97288e-52		AT5G04140	GLU1	-3.0586	1.86504e-09	1.04676e-08
AT5G63230		7.69268	6.71532e-18	8.65663e-17		AT1G14185		-3.05678	1.72581e-26	3.73553e-25
AT3G19920		7.6846	1.7537e-40	7.34808e-39		AT1G70860		-3.05554	5.66114e-11	3.90019e-10
AT1G80580	ERF084	7.67999	1.28968e-23	2.36085e-22		AT5G22920	RZPF34	-3.05116	2.37767e-15	2.50369e-14
AT3G50980	XERO1	7.6774	4.47408e-116	1.69263e-113		AT2G35130		-3.05049	2.38766e-10	1.51944e-09
AT5G59170		7.67048	3.98274e-127	2.07931e-124		AT4G34770		-3.04496	8.73701e-06	2.96813e-05
AT3G23060		7.66217	4.09905e-37	1.47997e-35		AT1G04050	SUVR1	-3.04028	1.16951e-11	8.77519e-11
AT3G48620		7.65645	2.88085e-17	3.5389e-16		AT4G10310	HKT1	-3.03987	4.32441e-12	3.38984e-11
AT2G29350	SAG13	7.64911	8.78187e-53	5.9083e-51		AT2G09665		-3.0387	0.00223752	0.00494566
AT5G49180	PME58	7.63977	7.16927e-18	9.21905e-17		ATCG00370	TRNS.3	-3.03766	1.05305e-05	3.53281e-05
AT1G16705		7.63862	1.63746e-97	4.03248e-95		AT2G21990		-3.03558	0.00851076	0.0166828
AT2G31980	CYS2	7.61409	3.4562e-117	1.34658e-114		AT5G23780	DUF9	-3.03541	1.89862e-08	9.45649e-08
AT2G45760	BAP2	7.60342	3.62693e-46	1.90115e-44		AT3G50560		-3.0326	1.42265e-09	8.13511e-09
AT2G41470		7.59561	2.29637e-50	1.41046e-48		AT5G54790	VUP4	-3.03191	4.04196e-10	2.4832e-09
AT2G29470	GSTU3	7.57	8.65878e-29	2.10933e-27		ATCG00950	RRN23S.1	-3.02844	4.64026e-19	6.42596e-18
AT1G35750	APUM10	7.56227	1.38224e-17	1.73973e-16		ATCG01180	RRN23S.2	-3.02017	3.79293e-19	5.28338e-18
AT5G08460		7.55213	6.11897e-15	6.21758e-14		AT4G00165		-3.01997	9.8775e-09	5.10276e-08
AT5G38195		7.55	7.64916e-18	9.8168e-17		ATCG00920	RRN16S.1	-3.01584	3.3007e-35	1.08927e-33
AT1G23201		7.54536	3.32418e-16	3.76789e-15		AT3G59790	MPK10	-3.01276	0.00863227	0.0168969
AT4G32090		7.53343	1.56248e-16	1.82819e-15		AT3G46490		-3.01245	0.0075862	0.0150285
AT4G14690	ELIP2	7.5285	4.96829e-90	1.0293e-87		AT5G50180		-3.00923	1.32456e-15	1.42995e-14
AT1G25270		7.51008	1.37219e-16	1.61059e-15		AT2G37950		-3.00843	6.08403e-09	3.22997e-08
AT5G61605	ESFL10	7.50822	7.71457e-17	9.22919e-16		AT4G39710	PNSL4	-3.00681	2.85547e-11	2.03603e-10
AT5G05040		7.50588	3.30207e-27	7.4244e-26		AT2G40460	NPF5.1	-3.00602	3.35596e-11	2.3786e-10
AT1G65340	CYP96A3	7.49491	5.42061e-17	6.55394e-16		ATCG00640	RPL33	-3.00388	4.29581e-23	7.70177e-22
AT2G32830	PHT1-5	7.49084	7.3646e-81	1.20909e-78		AT5G39000		-3.00324	1.01679e-14	1.01694e-13
AT3G03620	DTX24	7.48673	5.67932e-17	6.86039e-16		ATCG01210	RRN16S.2	-2.99983	2.49708e-32	7.25877e-31
AT1G25310	MEE8	7.48564	2.25871e-15	2.3871e-14		AT1G20440	COR47	-2.99747	1.66982e-09	9.4389e-09
AT1G15150	DTX10	7.47362	5.5535e-126	2.73526e-123		AT5G40900		-2.989	0.0104386	0.0200433
AT5G51465		7.47239	4.26405e-51	2.70824e-49		AT4G24350		-2.98486	2.18244e-11	1.57988e-10
AT2G41280	M10	7.46879	1.99048e-158	1.73199e-155		ATCG00700	PSBN	-2.98173	9.31143e-07	3.63001e-06
AT5G16700		7.45553	1.02228e-16	1.21243e-15		AT3G23480		-2.98164	1.09069e-15	1.18384e-14
AT2G21930		7.43784	1.22716e-37	4.57624e-36		AT5G24155		-2.97549	4.62103e-06	1.63496e-05
AT3G51200		7.42334	1.77466e-15	1.89316e-14		AT1G17600		-2.96877	3.22819e-09	1.76516e-08
AT1G51040	PI4KA2	7.42141	2.91635e-15	3.03906e-14		AT1G34760	GRF11	-2.96874	2.09316e-14	2.03653e-13
AT4G37360	CYP81D2	7.41033	4.96098e-16	5.54373e-15		AT3G47620	TCP14	-2.96839	6.30596e-13	5.39e-12
AT5G44630	BS	7.40493	5.88369e-16	6.51901e-15		AT5G14120		-2.95606	2.76871e-09	1.52478e-08
AT5G05020		7.3979	2.02457e-24	3.86043e-23		ATCG00730	PETD	-2.95446	8.06358e-22	1.34328e-20
AT1G17010		7.37729	1.89262e-14	1.8483e-13		AT3G05140	RBK2	-2.94941	2.5365e-09	1.40162e-08
AT1G51020		7.36533	4.68428e-16	5.24351e-15		AT5G45200		-2.94895	0.000324334	0.000837595
AT1G33960	AIG1	7.3613	2.78868e-113	1.03994e-110		AT5G15180	PER56	-2.94724	2.72382e-09	1.50037e-08
AT5G59320	LTP3	7.36116	3.8234e-131	2.07929e-128		AT5G10230	ANNAT7	-2.9466	9.53523e-05	0.000271268
AT2G21450	CHR34	7.35977	6.29889e-60	5.44458e-58		AT5G39210	CRR7	-2.9461	8.86301e-09	4.60876e-08
AT1G29680	OBAP2C	7.35803	2.87685e-35	9.53286e-34		AT2G30730		-2.94332	0.0104535	0.0200676
AT2G24255		7.35629	1.07363e-16	1.27044e-15		AT5G03620	SBT4.15	-2.94175	2.83758e-08	1.37911e-07
AT1G49475		7.35259	1.22809e-77	1.8112e-75		AT5G23980	FRO4	-2.93702	4.69907e-15	4.80849e-14
AT2G17950	WUS	7.35111	3.14469e-16	3.5753e-15		AT2G29310		-2.93393	3.41534e-07	1.42282e-06
AT3G60120	BGLU27	7.35071	7.26551e-16	7.98227e-15		AT2G21210		-2.92878	5.38382e-22	9.0612e-21
AT5G24275		7.34894	7.04956e-63	6.47964e-61		AT5G19970		-2.92477	2.15772e-25	4.33937e-24
AT3G15370	ATEXPA12	7.3489	1.60076e-73	1.98039e-71		AT3G53980		-2.91914	2.1175e-05	6.77476e-05
AT1G78840		7.31088	5.78846e-16	6.42167e-15		AT1G13930		-2.91777	4.23997e-15	4.35064e-14
AT3G02480		7.31074	2.07058e-48	1.1674e-46		AT1G22370	UGT85A5	-2.91734	1.60629e-19	2.30388e-18
AT4G31615	REM2	7.30496	4.02816e-88	7.96598e-86		AT1G10110		-2.916	5.51661e-07	2.222e-06
AT2G14160		7.29969	3.26651e-34	1.03356e-32		AT2G04800		-2.91583	4.11736e-20	6.19121e-19
AT5G30500	GOLS10	7.29842	3.82151e-16	4.31287e-15		AT5G38410		-2.91168	1.80635e-09	1.01579e-08
AT3G15536		7.29518	2.96761e-16	3.38577e-15		AT1G54215		-2.90996	0.00215473	0.00477805
AT1G55650	HMGB11	7.28764	1.34048e-15	1.44654e-14		AT1G30520	AAE14	-2.90504	1.88227e-13	1.69022e-12
AT1G27555		7.28485	3.2681e-16	3.70592e-15		AT1G67640		-2.9045	0.0121487	0.0230272
AT3G25080		7.26879	6.17146e-16	6.82626e-15		AT1G62333		-2.9009	0.0121478	0.023027
AT2G18190		7.25543	4.64757e-16	5.20464e-15		AT2G44745	WRKY12	-2.90084	0.00277248	0.00602204
AT1G22210	TPPC	7.25315	6.61679e-16	7.28797e-15		AT1G52060	JAL9	-2.90071	1.72172e-24	3.29983e-23
AT2G47030	PME4	7.24957	2.80086e-15	2.92923e-14		AT1G43010		-2.89589	0.0121852	0.0230895
AT1G70380		7.24305	3.3852e-15	3.51081e-14		AT4G26288		-2.89578	5.69717e-11	3.92088e-10
AT1G60970		7.24167	1.09075e-95	2.54223e-93		AT3G61840		-2.89297	1.35984e-07	6.01853e-07
AT5G37150		7.22927	2.28305e-15	2.41087e-14		AT1G03055	D27	-2.88773	3.59501e-09	1.95509e-08
AT1G68170		7.22919	7.25073e-85	1.28757e-82		AT4G08410		-2.88369	1.4839e-20	2.29613e-19
AT5G12910		7.2204	6.44382e-16	7.10644e-15		AT4G04990		-2.88273	7.30457e-08	3.35879e-07
AT4G35180	LHT7	7.20962	1.76488e-94	4.00612e-92		AT1G01880	GEN1	-2.87995	1.95864e-08	9.73132e-08
AT1G13620	RGF2	7.20847	8.75165e-67	8.92395e-65		AT1G67460		-2.87987	3.24886e-05	0.000100734
AT1G27860		7.20621	2.82503e-15	2.95215e-14		AT1G76240		-2.87845	1.84599e-09	1.03741e-08
AT1G51530		7.16603	3.61534e-15	3.73023e-14		AT4G09415		-2.87835	0.00753612	0.0149395
AT5G52500		7.15927	2.19988e-14	2.13637e-13		AT4G35900	FD	-2.87696	3.02855e-11	2.15474e-10
AT5G25470		7.14777	3.39684e-108	1.10839e-105		AT5G38430	RBCS-1B	-2.87445	0.000168823	0.000459153
AT1G06883		7.13743	2.25772e-15	2.38702e-14		AT5G56550	OXS3	-2.87345	3.06137e-16	3.48513e-15
AT1G73010	PS2	7.13357	0	0		AT2G14760		-2.87266	0.00294097	0.00635153
AT1G69880	TRX8	7.13248	5.04381e-47	2.73161e-45		AT1G52650		-2.87199	0.00386823	0.00814588
AT5G51490	PME59	7.1319	8.29241e-63	7.59526e-61		AT2G22990	SNG1	-2.87063	2.05683e-09	1.14947e-08
AT1G21240	WAK3	7.12457	1.01711e-38	3.98062e-37		AT4G38390	RHS17	-2.87057	8.68335e-20	1.27271e-18
AT1G48660		7.1239	2.53098e-51	1.62331e-49		AT3G16250	PNSB3	-2.87042	4.4108e-19	6.11469e-18
AT2G01240		7.11268	1.25976e-14	1.248e-13		AT4G31875		-2.8704	0.0102235	0.0196709
AT1G73560		7.10326	7.4142e-15	7.48995e-14		ATCG01240	RPS7-A	-2.87026	2.2566e-40	9.42499e-39
AT1G14880	PCR1	7.10291	1.09418e-19	1.59567e-18		ATCG00150	ATPI	-2.86956	5.47647e-50	3.29396e-48
AT1G33730	CYP76C5	7.09571	1.67904e-14	1.64649e-13		ATCG00905	RPS12C	-2.86934	5.59425e-28	1.30386e-26
AT4G22105	SCRL26	7.07815	1.59394e-22	2.77388e-21		AT4G07465		-2.86491	0.0129299	0.0243294
AT1G47980		7.07457	1.94182e-14	1.89563e-13		AT4G10010		-2.86312	0.0133916	0.0251226
AT4G36350	PAP25	7.07257	1.49983e-38	5.85227e-37		AT2G18800	XTH21	-2.86051	0.000606084	0.00149285
AT5G44990		7.06345	1.20103e-14	1.19279e-13		AT2G37870		-2.86026	2.82868e-07	1.19154e-06
AT4G25330		7.05987	4.82979e-35	1.57596e-33		AT3G23100	XRCC4	-2.86025	2.22864e-29	5.61549e-28
AT1G19250	FMO1	7.05574	1.71464e-63	1.59284e-61		AT3G62410	CP12-2	-2.85897	2.06086e-09	1.15147e-08
AT5G61412		7.0435	2.16046e-69	2.32085e-67		AT5G02160		-2.8547	9.78249e-13	8.14293e-12
AT2G26400	ARD	7.04043	1.12099e-63	1.0526e-61		AT4G10150	ATL7	-2.85084	0.00450611	0.00933699
AT5G34871		7.03224	7.46521e-15	7.53857e-14		AT2G38995		-2.85035	0.000988183	0.00234185
AT2G47780		7.02307	6.07121e-41	2.57696e-39		ATCG00220	PSBM	-2.84786	9.36576e-27	2.05794e-25
AT5G37165		7.01529	1.31826e-14	1.30348e-13		AT1G14150	PNSL2	-2.84503	8.16253e-13	6.88448e-12
AT3G21380	JAL36	7.00271	1.70803e-53	1.18266e-51		AT5G21430	ndhU	-2.84442	3.32137e-08	1.60024e-07
AT2G34317		6.99693	4.33542e-14	4.11534e-13		AT2G04795		-2.84439	9.14081e-12	6.95256e-11
AT2G36724		6.98775	6.07653e-14	5.69967e-13		AT3G02400		-2.84323	0.0146954	0.0273322
AT5G10120	EIL4	6.97698	2.00933e-21	3.27822e-20		AT2G28720		-2.84262	3.22397e-22	5.52584e-21
AT1G80330	GA3OX4	6.9725	7.69357e-14	7.14454e-13		AT1G68520	COL6	-2.84255	8.29242e-09	4.33104e-08
AT1G24735		6.96935	6.98564e-71	7.99794e-69		ATCG01230	RPS12B	-2.8416	2.95318e-27	6.6629e-26
AT2G28610	WOX3	6.96476	8.63778e-24	1.60256e-22		ATCG00900	RPS7-A	-2.84073	1.81995e-33	5.56299e-32
AT5G38197		6.96395	2.35918e-14	2.28173e-13		AT1G06420		-2.84058	3.7201e-06	1.33173e-05
AT2G18660	EGC2	6.96018	8.68998e-13	7.30103e-12		AT5G40330	MYB23	-2.83799	7.31795e-07	2.89524e-06
AT2G42000		6.95479	1.11642e-12	9.23999e-12		AT2G24692		-2.8347	0.00330367	0.00705315
AT2G20470		6.95091	2.29066e-14	2.21793e-13		AT5G37990		-2.83312	2.91927e-20	4.44601e-19
AT2G24000	SCPL22	6.9471	2.49357e-33	7.58649e-32		AT4G15990		-2.83286	2.6355e-06	9.61794e-06
AT2G02140	PDF2.6	6.92945	1.21455e-13	1.10894e-12		AT4G36540	BEE2	-2.82763	2.99894e-08	1.45402e-07
AT5G63240		6.92587	2.28795e-12	1.83825e-11		AT2G29180		-2.82267	4.33884e-31	1.18227e-29
AT2G23270		6.87819	5.89257e-14	5.53308e-13		AT4G21445		-2.8199	9.24797e-11	6.19988e-10
AT2G27940	ATL57	6.87597	7.74916e-16	8.49219e-15		AT5G40981		-2.81986	0.0153945	0.0284965
AT2G21260		6.87264	3.67021e-99	9.39286e-97		AT3G26740	CCL	-2.81897	2.25682e-16	2.60443e-15
AT4G15248	MIP1A	6.86278	2.84916e-25	5.69048e-24		AT1G20160	CRSP	-2.81804	1.07799e-11	8.12354e-11
AT3G55870		6.84535	9.6528e-14	8.88807e-13		ATCG00620	TRNP	-2.81484	2.3118e-13	2.06104e-12
AT3G57240	BG3	6.81048	3.9427e-93	8.43608e-91		AT4G28080	TSS	-2.81394	1.46159e-10	9.5503e-10
AT1G04645	SPH5	6.81025	1.07182e-19	1.56569e-18		AT1G15980	PNSB1	-2.81369	3.30443e-09	1.8042e-08
AT5G10760	AED1	6.80978	3.5314e-142	2.24838e-139		AT3G24715		-2.80863	2.39565e-15	2.5206e-14
AT1G55230		6.80896	6.43032e-13	5.49091e-12		AT1G49210	ATL76	-2.80784	0.00391874	0.00824057
AT5G39715		6.8057	3.9623e-13	3.45464e-12		AT2G43550	ATTI6	-2.80606	8.46567e-08	3.85399e-07
AT3G21860	ASK10	6.77813	3.04854e-25	6.07939e-24		AT4G29905		-2.80514	1.64164e-33	5.04157e-32
AT2G26020	PDF1.2B	6.7687	8.83205e-49	5.05596e-47		AT2G34420	LHB1B2	-2.80246	6.35408e-08	2.94404e-07
AT1G19115		6.76694	1.16864e-25	2.39265e-24		AT1G65190		-2.80107	7.21238e-11	4.90292e-10
AT2G31985	OBAP1B	6.76368	6.43228e-11	4.3978e-10		AT1G57980	PUP23	-2.79939	1.63381e-10	1.06145e-09
AT2G19900	NADP-ME1	6.75433	1.10772e-52	7.39536e-51		AT4G21650	SBT3.13	-2.79918	0.00821595	0.016168
AT1G68877		6.75256	7.528e-13	6.3823e-12		AT3G55780		-2.79775	0.0154302	0.0285586
AT5G44306		6.75151	5.03742e-13	4.34413e-12		AT3G55710	UGT76F2	-2.79543	7.04512e-13	5.98457e-12
AT3G04903		6.747	3.75889e-13	3.28607e-12		AT3G05936		-2.7927	2.5035e-09	1.38456e-08
AT3G07920		6.74468	4.50345e-22	7.6188e-21		ATCG00570	PSBF	-2.7906	3.84067e-08	1.83419e-07
AT1G78390	NCED9	6.73621	6.67832e-76	9.22386e-74		ATCG00170	RPOC2	-2.78803	3.50764e-12	2.76794e-11
AT1G08065	ACA5	6.73328	9.44834e-13	7.89247e-12		AT1G14280	PKS2	-2.78774	3.80823e-08	1.8197e-07
AT1G76470		6.72842	1.37054e-11	1.01667e-10		AT5G04355		-2.78766	0.0163005	0.0299801
AT4G11340		6.72292	3.04282e-15	3.16832e-14		AT3G26310	CYP71B35	-2.78685	1.23856e-13	1.13007e-12
AT3G15830		6.70363	2.9413e-22	5.06128e-21		AT4G09110	ATL35	-2.78596	0.0162815	0.0299473
AT5G27060	AtRLP53	6.69669	8.96369e-47	4.81457e-45		AT3G46760	LECRKS3	-2.78502	0.00535802	0.0109535
AT1G62530		6.69617	4.35088e-22	7.37024e-21		AT1G63600		-2.78462	0.00408857	0.00856016
AT2G02340	PP2B8	6.69411	3.18053e-20	4.83263e-19		AT3G63140	CSP41A	-2.78257	7.64264e-08	3.50313e-07
AT4G09610	GASA2	6.69222	3.21717e-10	2.00384e-09		ATCG00200	TRNC	-2.78217	0.00254243	0.00555145
AT5G09360	LAC14	6.66349	1.17472e-19	1.70931e-18		AT1G61165		-2.78096	0.0161909	0.0298059
AT3G15605		6.65868	1.74115e-20	2.68148e-19		AT3G46370		-2.78086	0.00411749	0.00861173
AT4G14695	MPC2	6.65515	4.04552e-74	5.10166e-72		AT5G41820	RGTA2	-2.778	0.00241969	0.00530786
AT2G47520	ERF071	6.65056	9.85604e-86	1.81185e-83		AT5G09660	PMDH2	-2.77707	6.7194e-11	4.58331e-10
AT5G22545		6.63366	1.72244e-12	1.39983e-11		AT1G26230	CPN60B4	-2.77511	1.28955e-21	2.12382e-20
AT3G21800	UGT71B8	6.62016	6.09676e-11	4.18485e-10		AT2G31085	CLE6	-2.77233	3.23299e-07	1.35095e-06
AT2G23190	CYP81D7	6.60995	1.63342e-30	4.3332e-29		AT5G06690	WCRKC1	-2.77173	4.49923e-12	3.52062e-11
AT2G45130	SPX3	6.6077	1.56813e-89	3.22318e-87		AT5G47240	atnudt8	-2.7711	2.37616e-20	3.63371e-19
AT5G44940		6.60615	1.05287e-12	8.73896e-12		AT5G61590	ERF107	-2.7695	1.86156e-30	4.92341e-29
AT4G22050		6.5989	1.2372e-12	1.01976e-11		AT5G45520		-2.76825	1.11986e-06	4.30907e-06
AT1G33760	ERF022	6.59213	2.66462e-42	1.21603e-40		AT1G75460		-2.76803	1.8862e-07	8.16136e-07
AT1G64160	DIR5	6.58958	2.82285e-12	2.24589e-11		AT1G74770		-2.76764	3.37137e-21	5.40912e-20
AT3G28890	AtRLP43	6.58827	1.21913e-71	1.40815e-69		AT1G04240	SHY2	-2.76568	2.37307e-15	2.49987e-14
AT2G22180		6.58403	7.33439e-33	2.19058e-31		AT1G33170		-2.76551	1.47752e-07	6.51068e-07
AT1G71160	KCS7	6.57992	1.56956e-12	1.28117e-11		AT2G01520	MLP328	-2.76364	5.54648e-52	3.61963e-50
AT1G12890	ERF088	6.57717	3.42974e-32	9.92572e-31		AT5G26620		-2.7632	0.00542342	0.0110722
AT1G33950	IAN7	6.57001	1.51232e-12	1.23638e-11		AT1G70760	ndhL	-2.76249	3.09478e-09	1.69505e-08
AT2G26450	PME13	6.56447	2.10003e-47	1.15166e-45		AT1G29600		-2.76146	4.43339e-08	2.09882e-07
AT3G02677		6.55208	4.7382e-59	3.96429e-57		AT4G12510		-2.76127	2.21042e-12	1.77869e-11
AT2G23220	CYP81D6	6.54866	6.1952e-12	4.79027e-11		AT5G48320		-2.75977	6.21086e-08	2.88074e-07
AT5G03860	MLS	6.54802	0	0		AT3G15450		-2.75714	1.03681e-17	1.31382e-16
AT5G17970		6.53939	4.60925e-12	3.60131e-11		AT5G65030		-2.75669	8.27132e-08	3.77473e-07
AT2G43510	ATTI1	6.52769	1.54722e-75	2.07122e-73		AT3G46400		-2.7562	0.00424979	0.00886358
AT4G01180		6.5274	2.34867e-12	1.88529e-11		ATCG00230	TRND	-2.75304	0.00474782	0.00979353
AT5G52330		6.5183	9.07267e-55	6.59702e-53		ATCG00540	PETA	-2.75272	1.1357e-19	1.65437e-18
AT3G03260	HDG8	6.51005	1.58764e-75	2.11448e-73		AT3G28070		-2.7524	1.22112e-09	7.04447e-09
AT1G12805		6.50936	6.32557e-59	5.25868e-57		AT4G13572		-2.75217	0.00518092	0.0106189
AT1G12600	UTR4	6.50908	2.53398e-50	1.54911e-48		AT5G66660		-2.75105	0.0175101	0.031926
AT1G20923		6.50616	3.79374e-12	2.98288e-11		AT3G04960		-2.75048	0.000367265	0.000939911
AT5G07210	ARR21	6.50468	3.94732e-11	2.77066e-10		AT3G56000	CSLA14	-2.74836	1.34744e-07	5.96668e-07
AT4G37710	VQ29	6.50427	3.00945e-12	2.3884e-11		AT2G29300		-2.74311	8.29208e-11	5.59753e-10
AT3G44350	anac061	6.50321	1.07155e-34	3.43634e-33		AT1G35170		-2.74269	0.00104606	0.00246983
AT5G56075		6.49869	2.1887e-11	1.58397e-10		AT5G44620	CYP706A3	-2.74237	0.00332292	0.00709194
AT1G06135		6.49072	3.4165e-21	5.47815e-20		AT1G08900	SUGTL3	-2.74096	3.45027e-13	3.02641e-12
AT4G14780		6.48302	1.90748e-123	8.585e-121		AT1G06120		-2.73653	0.000460451	0.00115662
AT1G65483		6.47976	7.04029e-12	5.42443e-11		ATCG00260	TRNT.1	-2.73311	0.00195161	0.0043677
AT4G22235		6.47803	1.80037e-63	1.66656e-61		AT1G50750		-2.73247	0.0193628	0.0349331
AT3G17540		6.47135	8.21766e-12	6.28889e-11		AT4G06536		-2.73171	6.82841e-12	5.26774e-11
AT1G62290	APA2	6.47083	1.07858e-160	9.70867e-158		AT5G40450		-2.72982	0.000328864	0.000848035
AT1G68320	MYB62	6.46982	6.98911e-61	6.16364e-59		ATCG00250	TRNE	-2.7274	0.000407021	0.00103305
AT3G47190		6.46623	2.22187e-17	2.75403e-16		ATCG01040	CCSA	-2.72657	4.16346e-10	2.55424e-09
AT2G20800	NDB4	6.45886	2.80049e-10	1.76367e-09		AT3G01260		-2.72607	3.16501e-13	2.78544e-12
AT4G18330		6.45667	1.39425e-22	2.43465e-21		ATCG00320	TRNFM	-2.72606	0.000745912	0.00180708
AT1G71690		6.45373	2.45315e-45	1.26057e-43		AT2G42900		-2.72551	5.54856e-12	4.30942e-11
AT3G48209		6.45123	1.622e-11	1.19236e-10		AT4G36470		-2.72168	8.58052e-18	1.09529e-16
AT4G05110	ATENT6	6.44963	3.73562e-68	3.91625e-66		AT2G18260	SYP112	-2.71966	1.69396e-08	8.47597e-08
AT4G36600		6.44414	1.2708e-11	9.46988e-11		AT2G48020		-2.71858	4.56753e-10	2.78577e-09
AT4G08868		6.44269	2.08491e-25	4.20267e-24		AT1G51870		-2.71732	0.000424642	0.00107422
AT1G72100		6.43939	9.83513e-11	6.57623e-10		AT4G29730	MSI5	-2.71672	9.44802e-14	8.70565e-13
AT1G49110		6.43362	3.59441e-34	1.13319e-32		AT5G45680	FKBP13	-2.71563	6.34071e-11	4.34089e-10
AT5G07050		6.43219	1.67176e-11	1.22687e-10		AT2G44230		-2.71498	7.34124e-12	5.64964e-11
AT4G39745		6.42694	8.16123e-12	6.24753e-11		AT4G12520		-2.71491	2.44516e-09	1.35344e-08
AT2G32460	MYB101	6.42409	1.18148e-21	1.94828e-20		AT5G14740	BCA2	-2.71445	2.54954e-07	1.08058e-06
AT3G12960		6.41238	1.96958e-24	3.76107e-23		AT4G32340		-2.71368	1.41208e-10	9.24293e-10
AT5G37140		6.41232	2.58517e-11	1.85445e-10		AT1G72610	GLP1	-2.7132	1.10982e-06	4.27298e-06
AT4G21690	GA3OX3	6.41152	1.0156e-11	7.67995e-11		ATCG00160	RPS2	-2.71248	1.19589e-09	6.9142e-09
AT2G44590	DRP1D	6.40877	5.42751e-58	4.37283e-56		AT1G68190		-2.71025	2.93738e-07	1.23434e-06
AT2G01770	VIT1	6.40332	1.02265e-63	9.6373e-62		AT4G13300	TPS13	-2.70807	3.36342e-05	0.000104039
AT1G01305		6.39614	4.68714e-19	6.48744e-18		AT4G38825		-2.70548	1.15948e-16	1.36708e-15
AT5G53270		6.39003	3.90607e-11	2.74392e-10		AT1G43140		-2.70476	0.000425269	0.00107549
AT1G09550	PAE1	6.38853	2.12899e-11	1.54418e-10		AT5G25240		-2.70435	5.01748e-11	3.4751e-10
AT2G13900		6.388	1.08127e-11	8.14355e-11		AT2G46455		-2.70206	0.00554279	0.0112897
AT5G10040		6.38754	9.69377e-46	5.04076e-44		AT5G07880	SNAP29	-2.70167	0.00622788	0.0125539
AT5G09930	ABCF2	6.38065	2.04609e-11	1.48653e-10		AT2G28580		-2.6966	0.00881056	0.017211
AT1G80130		6.38003	7.8481e-125	3.65834e-122		ATCG00310	TRNG.2	-2.69475	0.00597873	0.0120974
AT5G54610	BAD1	6.37361	6.48649e-11	4.43255e-10		AT1G03630	PORC	-2.69382	2.73299e-14	2.63644e-13
AT1G68240	BHLH109	6.37043	7.24672e-40	2.98373e-38		AT2G45610	CXE9	-2.68847	0.0214166	0.0382499
AT5G61630		6.3622	1.0833e-23	1.99145e-22		AT1G70850	MLP34	-2.68762	3.10335e-37	1.12984e-35
AT5G13170	SWEET15	6.35243	9.7556e-36	3.32021e-34		AT3G28060		-2.68702	0.0205374	0.0368308
AT1G77120	ADH1	6.34592	6.86917e-78	1.02464e-75		AT2G25600	AKT6	-2.68656	0.0208587	0.0373494
AT3G21352		6.34086	3.34239e-54	2.37092e-52		AT4G11211		-2.6858	6.76844e-10	4.0394e-09
AT4G18900		6.33788	3.30173e-44	1.6262e-42		AT1G72416		-2.68388	6.43487e-10	3.85531e-09
AT5G01425		6.33523	3.14094e-11	2.23287e-10		AT4G23496	SP1L5	-2.67882	0.00620455	0.012511
AT1G68510	LBD42	6.33289	1.30325e-09	7.49339e-09		AT1G57943	PUP17	-2.67488	0.00710402	0.0141484
AT5G21150	AGO9	6.32496	1.45268e-102	4.07751e-100		AT5G63450	CYP94B1	-2.67459	4.24221e-08	2.01563e-07
AT4G17980	anac071	6.32303	2.31457e-17	2.86484e-16		AT1G50190		-2.67273	0.000439979	0.00110936
AT1G28030		6.32026	1.03011e-17	1.30602e-16		AT5G28770	BZIP63	-2.67051	1.58877e-08	7.98945e-08
AT3G09400	PLL3	6.31881	7.30571e-40	3.00328e-38		AT1G71030	ATMYBL2	-2.66914	4.23702e-06	1.50727e-05
AT5G56300	GAMT2	6.31713	9.27609e-44	4.49245e-42		AT4G21870	HSP15.4	-2.66385	3.19362e-06	1.15258e-05
AT5G51500	PME60	6.30738	1.23093e-46	6.57099e-45		ATCG00560	PSBL	-2.66358	5.30775e-13	4.57273e-12
AT2G22942		6.29931	3.81954e-13	3.33797e-12		AT5G10950		-2.6617	9.60261e-68	9.94709e-66
AT4G15396	CYP702A6	6.29338	1.9846e-52	1.31155e-50		AT5G56910		-2.65698	3.31666e-55	2.43882e-53
AT2G38920	RF178	6.29095	3.09736e-39	1.24774e-37		AT2G36050	OFP15	-2.65592	6.43419e-08	2.98009e-07
AT1G26390	FOX2	6.2907	2.57141e-35	8.55083e-34		AT1G01320		-2.65463	1.29965e-07	5.76484e-07
AT3G48850	MPT2	6.28582	2.34362e-43	1.10629e-41		AT1G36940		-2.65362	3.67047e-10	2.26832e-09
AT1G09370		6.2464	1.04661e-15	1.13741e-14		AT1G69230	SP1L2	-2.65332	4.25851e-08	2.02264e-07
AT3G23120	AtRLP38	6.24283	4.07424e-38	1.55261e-36		AT1G62035	MIR171C	-2.65019	0.000569144	0.00140891
AT5G02720		6.23912	8.65632e-11	5.83285e-10		AT5G25810	TINY	-2.64869	3.2097e-42	1.45968e-40
AT4G18620	PYL13	6.23414	7.73068e-10	4.57496e-09		AT4G37409		-2.64809	0.0115955	0.0220651
AT3G09922	IPS1	6.22704	3.02389e-30	7.90148e-29		AT4G13493	MIR850A	-2.64755	1.35131e-13	1.22865e-12
AT5G07310	ERF115	6.22646	2.59154e-21	4.18883e-20		AT4G22485		-2.6469	0.00901775	0.0175619
AT5G07540	GRP16	6.2189	3.05224e-10	1.9084e-09		AT3G55330	PPL1	-2.645	2.51975e-09	1.39296e-08
AT1G51470	TGG5	6.20944	2.53538e-36	8.8599e-35		AT3G28080		-2.64401	3.67725e-08	1.76001e-07
AT5G45570		6.20697	5.32255e-21	8.43081e-20		AT1G13790	FDM4	-2.64335	1.39015e-11	1.02946e-10
AT3G11165		6.20513	3.14172e-10	1.96106e-09		AT2G14580	PRB1	-2.64071	3.87719e-05	0.000118541
AT5G05465		6.20129	5.60625e-15	5.70993e-14		AT1G80440		-2.64043	5.81485e-13	4.98656e-12
AT1G05880	ARI12	6.19448	7.57906e-11	5.14281e-10		AT1G80180		-2.64034	6.32925e-20	9.37677e-19
AT3G04660		6.18864	9.87517e-26	2.03298e-24		AT4G28755		-2.63874	0.0239448	0.0423106
AT3G47710	PRE4	6.18765	8.49036e-42	3.80812e-40		AT3G63160		-2.63831	3.54375e-12	2.7939e-11
AT4G14165		6.18483	1.69897e-10	1.10186e-09		ATCG00680	PSBB	-2.63503	7.72481e-11	5.23626e-10
AT4G26420	GAMT1	6.18356	2.87797e-10	1.80593e-09		AT3G50450	HR1	-2.62727	0.00962512	0.0186183
AT5G51760	AHG1	6.17861	1.11259e-17	1.40849e-16		AT5G52100	DAPB3	-2.6268	1.71678e-10	1.11286e-09
AT2G02320	PP2B7	6.17575	9.29952e-11	6.23087e-10		AT5G03130		-2.62375	0.0142712	0.0266262
AT1G21860	sks7	6.17538	3.27173e-21	5.25895e-20		AT4G22666		-2.61318	2.83937e-19	4.0086e-18
AT1G16760		6.17348	3.23816e-10	2.01451e-09		AT5G36700	PGLP1A	-2.61308	1.32585e-12	1.08865e-11
AT3G23970		6.17094	1.56815e-16	1.83345e-15		AT3G53820		-2.61306	0.0245417	0.0432337
AT1G49330		6.16035	3.10074e-49	1.81078e-47		AT1G60470	GOLS4	-2.61266	2.68679e-09	1.48122e-08
AT4G37500		6.15633	2.09546e-10	1.34629e-09		AT3G61060	AtPP2-A13	-2.61188	6.02793e-25	1.184e-23
AT5G62850	SWEET5	6.15368	1.23174e-63	1.14834e-61		AT3G22210		-2.61015	1.01925e-11	7.7009e-11
AT5G44950		6.14905	1.19171e-10	7.90354e-10		AT5G46900		-2.60976	2.40289e-05	7.61042e-05
AT1G20800		6.14508	3.24139e-10	2.01604e-09		AT1G17700	PRA1F1	-2.60891	2.85183e-06	1.03582e-05
AT3G44290	NAC60	6.14216	1.00472e-65	9.93453e-64		AT5G41730		-2.60517	0.000652966	0.00159867
AT2G38530	LTP2	6.14039	0	0		AT3G28300	AT14A	-2.60419	0.0258436	0.0452857
AT5G61890	ERF114	6.14023	2.20681e-57	1.73514e-55		AT5G43175	BHLH139	-2.59946	0.013936	0.0260479
AT4G29305	LCR25	6.13666	2.19994e-10	1.40891e-09		AT3G18200		-2.59912	3.66392e-09	1.98925e-08
AT1G04863		6.13603	4.54681e-10	2.77378e-09		AT5G49360	BXL1	-2.59889	1.82366e-06	6.80457e-06
AT3G61660		6.13355	5.58201e-31	1.51469e-29		AT1G58370	RXF12	-2.59825	3.22488e-05	0.00010005
AT3G60100	CSY5	6.13	2.65847e-10	1.68031e-09		AT4G34930		-2.59673	2.96399e-05	9.25061e-05
AT4G33070	PDC1	6.12369	1.17632e-85	2.14733e-83		AT2G21200		-2.59655	6.76316e-05	0.000197854
AT3G11180		6.12255	3.59463e-15	3.7118e-14		AT2G29290		-2.59271	4.42165e-06	1.56846e-05
AT5G57550	XTH25	6.11889	7.83451e-42	3.52e-40		AT1G73600		-2.59269	1.78753e-16	2.07478e-15
AT5G06775		6.10472	5.94165e-10	3.5787e-09		AT4G16860	RPP4	-2.58975	2.43024e-17	2.99806e-16
AT2G23110		6.10448	1.04129e-29	2.65449e-28		AT1G33475	PHYL1.2	-2.58954	2.12753e-08	1.05224e-07
AT5G39720	AIG2LA	6.10322	1.14379e-13	1.04579e-12		AT5G02155		-2.58944	0.00946003	0.0183302
AT2G04565		6.1028	9.88476e-10	5.76994e-09		AT2G43010	PIF4	-2.58774	1.07741e-11	8.12147e-11
AT1G23160		6.09013	4.02464e-14	3.82869e-13		AT4G22505		-2.58703	0.0131121	0.0246358
AT1G64585	RTFL22	6.083	6.60247e-10	3.94938e-09		AT3G50700	GAF1	-2.58686	3.57831e-15	3.69787e-14
AT1G10010	AAP8	6.0791	5.19965e-10	3.15288e-09		AT1G68010	HPR	-2.58602	1.69857e-10	1.10186e-09
AT4G15370	BARS1	6.07621	1.55803e-56	1.18229e-54		AT5G01015		-2.58525	5.02057e-16	5.60311e-15
AT4G24204		6.07106	3.71336e-10	2.29157e-09		AT1G77760	NIA1	-2.58093	6.13222e-17	7.39037e-16
AT4G22233		6.06313	5.29851e-50	3.20167e-48		AT4G33010	GLDP1	-2.58032	2.43318e-16	2.79996e-15
AT1G67770	TEL2	6.06139	1.28781e-28	3.09835e-27		AT1G66230	MYB20	-2.58002	1.42627e-11	1.05412e-10
AT4G12490		6.06095	2.36901e-75	3.13911e-73		AT5G20630	GER3	-2.5757	7.50161e-07	2.96386e-06
AT2G43270		6.05861	2.84898e-10	1.7886e-09		AT3G62750	BGLU8	-2.57545	1.90342e-10	1.22866e-09
AT3G03240		6.05738	2.75206e-28	6.52496e-27		AT2G28990		-2.57457	3.04614e-22	5.23823e-21
AT2G03520	UPS4	6.05236	1.70723e-09	9.63999e-09		AT2G07325		-2.57067	0.0278074	0.048344
AT4G26590	OPT5	6.05127	2.73094e-10	1.72278e-09		AT2G37180	PIP2-3	-2.57053	8.31821e-17	9.91953e-16
AT5G65100	EIL5	6.04905	6.39542e-10	3.83431e-09		AT5G33370		-2.56668	1.70522e-09	9.63069e-09
AT4G31660	REM7	6.04193	5.92592e-10	3.57087e-09		AT3G51420	SSL4	-2.56641	1.63845e-09	9.27932e-09
AT5G39440	SnRK1.3	6.0398	3.68059e-10	2.2735e-09		AT3G26815	MIR169K	-2.56576	0.0275165	0.0478829
AT1G05550		6.02386	2.39602e-18	3.18299e-17		ATCG00720	PETB	-2.56522	1.47797e-31	4.12189e-30
AT4G00210	LBD31	6.00994	9.19218e-22	1.52545e-20		AT5G35630	GLN2	-2.56413	1.33411e-08	6.77807e-08
AT4G08550		6.0095	8.65401e-10	5.09482e-09		AT2G37170	PIP2B	-2.56363	3.04809e-21	4.90248e-20
AT2G08820		6.00809	6.2457e-61	5.5455e-59		AT5G27290		-2.56319	5.70917e-18	7.40348e-17
AT5G17430	BBM	6.00734	4.31574e-84	7.51054e-82		AT5G42230	SCPL41	-2.56224	0.00914541	0.0177875
AT2G47050		6.00627	9.13213e-11	6.13288e-10		AT1G65450		-2.56176	6.17598e-19	8.47177e-18
AT3G54520		6.00404	8.94752e-10	5.2534e-09		AT1G05763		-2.56132	0.0279929	0.0486147
AT4G25590	ADF7	6.00304	5.65984e-10	3.42318e-09		AT2G22200	ERF056	-2.56098	0.00237142	0.00520986
AT5G10140	FLC	6.00224	2.3322e-104	6.76441e-102		AT5G50915	BHLH137	-2.55985	4.00677e-06	1.43023e-05
AT2G31420		6.00115	5.85614e-10	3.53482e-09		AT2G01590	CRR3	-2.558	9.14429e-13	7.65317e-12
AT5G66260		6.00045	4.77369e-10	2.90675e-09		AT1G02020		-2.55749	1.1179e-18	1.51122e-17
AT3G44460	DPBF2	5.98636	2.71995e-08	1.32639e-07		AT4G26320	AGP13	-2.55425	4.23732e-08	2.01404e-07
AT2G01500	WOX6	5.96986	1.55261e-09	8.82413e-09		AT4G37930	SHM1	-2.55373	3.1565e-10	1.96934e-09
AT1G64820	DTX7	5.96777	6.42218e-10	3.84859e-09		AT1G19150	LHCA6	-2.55038	6.3958e-09	3.3879e-08
AT1G63070		5.96016	2.75812e-23	4.9791e-22		AT4G01190	ATPIPK10	-2.5502	0.0107251	0.0205375
AT1G53690		5.95815	5.39725e-75	7.11564e-73		AT4G08295		-2.54261	0.028809	0.0499058
AT1G32350	AOX3	5.95718	8.85259e-09	4.60426e-08		AT5G15310	ATMYB16	-2.54201	2.73102e-08	1.33129e-07
AT3G30725	GDU6	5.95622	8.65551e-29	2.10933e-27		AT4G33120		-2.54175	1.38487e-13	1.25873e-12
AT5G62400		5.95425	2.01763e-09	1.12949e-08		AT4G25400		-2.54136	8.05523e-11	5.44751e-10
AT2G34202	MIR399D	5.9529	4.51131e-35	1.47573e-33		AT2G28305	LOG1	-2.54078	1.19389e-11	8.9376e-11
AT1G58300	HO4	5.9434	2.56032e-15	2.6852e-14		AT1G20570		-2.53942	6.91687e-07	2.74864e-06
AT1G13755		5.94195	3.73278e-09	2.02495e-08		AT2G22540	SVP	-2.53939	4.369e-12	3.4218e-11
AT1G34392		5.93859	1.31368e-09	7.55172e-09		AT1G51080		-2.53766	1.78914e-25	3.62607e-24
AT1G14930		5.92838	1.27308e-82	2.13028e-80		AT5G17880	CSA1	-2.532	8.67984e-19	1.17887e-17
AT2G34020		5.92836	6.92701e-119	2.82535e-116		AT4G20953		-2.53152	0.0119734	0.0227263
AT4G21366		5.92782	9.23164e-10	5.40684e-09		AT1G19320		-2.53127	2.73729e-05	8.58824e-05
AT3G28570		5.92702	5.77608e-32	1.65509e-30		AT5G36790	PGLP1A	-2.5304	2.96838e-09	1.62992e-08
AT1G51490	BGLU36	5.92664	1.35914e-08	6.8958e-08		AT1G16880	ACR11	-2.52996	4.52557e-09	2.43478e-08
AT4G12580		5.92417	3.1972e-32	9.26302e-31		AT3G63088	RTFL14	-2.52808	0.00239031	0.00524915
AT2G08675		5.9232	1.78695e-09	1.00596e-08		AT5G67385	SR1IP1	-2.52781	9.80132e-06	3.30432e-05
AT2G21820		5.92115	3.93967e-77	5.68184e-75		AT1G49200	ATL75	-2.52634	0.000122	0.000339735
AT1G63210		5.90029	2.10012e-09	1.17115e-08		AT5G57567		-2.52334	0.00117425	0.00274504
AT3G02810	LIP2	5.89411	2.06601e-09	1.15385e-08		AT1G69020		-2.52325	7.67608e-27	1.69094e-25
AT5G55360	AT3	5.89359	2.31352e-21	3.74873e-20		AT4G14650		-2.52292	3.35606e-06	1.20687e-05
AT3G44300	NIT2	5.88672	1.41353e-73	1.75708e-71		AT1G07120		-2.52131	0.00198327	0.00443248
AT2G01960	TET14	5.88275	1.48732e-09	8.48078e-09		AT4G04015		-2.51778	0.0086716	0.016965
AT5G16023	RTFL18	5.87773	2.06377e-09	1.15285e-08		AT3G44753		-2.51767	0.00108702	0.00255659
AT3G07615		5.86502	2.03883e-24	3.88195e-23		AT1G61590	PBL15	-2.51707	5.61448e-13	4.82265e-12
AT1G75945		5.86176	9.67806e-60	8.33782e-58		AT1G29180		-2.51654	0.000452961	0.00113923
AT1G53945		5.86156	1.74131e-09	9.82815e-09		AT5G55720		-2.51497	8.25532e-09	4.31253e-08
AT1G17710		5.86049	1.79557e-93	3.9388e-91		AT1G51520		-2.51477	1.27395e-09	7.33137e-09
AT5G53230		5.85601	3.59281e-28	8.47215e-27		AT4G25220	RHS15	-2.51263	2.11723e-23	3.84876e-22
AT4G11350		5.85246	7.91715e-44	3.84144e-42		AT4G22200	AKT2	-2.51085	6.36261e-10	3.81727e-09
AT3G13640	ABCE1	5.84494	1.3356e-34	4.26215e-33		AT2G35370	GDH1	-2.50891	2.26712e-10	1.44838e-09
AT4G24890	PAP24	5.84483	4.49484e-54	3.17117e-52		AT1G52270		-2.50851	3.09487e-12	2.45334e-11
AT3G43110		5.83838	9.88153e-66	9.80788e-64		AT5G24150	SQE5	-2.50723	5.60638e-08	2.61244e-07
AT5G24600		5.82004	2.74378e-47	1.49216e-45		AT5G55570		-2.50522	8.72153e-06	2.96325e-05
AT5G66990	RKD3	5.81933	2.7207e-09	1.49897e-08		AT5G35190		-2.50402	2.44807e-10	1.55675e-09
AT4G33280		5.81193	8.21482e-85	1.44892e-82		ATCG00510	PSAI	-2.50389	2.49076e-07	1.05681e-06
AT4G37990	CAD8	5.81023	1.53895e-10	1.00256e-09		AT4G14103		-2.50374	3.45855e-08	1.66265e-07
AT2G17850		5.8004	3.14824e-41	1.3539e-39		AT2G33810	SPL3	-2.5034	4.24133e-08	2.01558e-07
AT3G17760	GAD5	5.79953	6.93919e-09	3.65793e-08		AT1G76800		-2.50182	3.28344e-06	1.18305e-05
AT3G54530		5.79768	4.18864e-09	2.26237e-08		AT1G30360	ERD4	-2.50181	5.7757e-09	3.07503e-08
AT1G04490		5.79457	1.81022e-104	5.36976e-102		AT1G64590		-2.50075	1.10935e-14	1.10571e-13
AT1G35910	TPPD	5.79265	1.21186e-93	2.68089e-91		AT1G67870		-2.49989	6.96171e-08	3.21189e-07
AT1G18100	MFT	5.78705	6.70512e-61	5.93323e-59		AT2G34510		-2.49904	1.95962e-08	9.73434e-08
AT2G25510		5.78679	1.76567e-155	1.44035e-152		AT1G53940	GLIP2	-2.49786	0.00388552	0.00817702
AT1G70390		5.78298	1.77043e-14	1.73416e-13		AT2G18470	PERK4	-2.49562	7.61739e-06	2.60985e-05
AT1G07493		5.7725	4.47578e-09	2.40898e-08		AT1G74890	ARR15	-2.49495	1.21094e-07	5.39241e-07
AT5G49190	SUS2	5.77009	8.15743e-74	1.02376e-71		AT5G45080	PP2A6	-2.49488	5.11232e-11	3.5389e-10
AT4G28420		5.76317	2.79498e-14	2.69325e-13		AT2G20870		-2.49461	0.00210572	0.00468168
AT5G07260		5.7581	1.41806e-08	7.17523e-08		AT5G49170		-2.49452	6.21325e-07	2.48492e-06
AT4G29850		5.75165	2.83227e-49	1.6577e-47		AT3G48420	CBBY	-2.494	9.16858e-10	5.37352e-09
AT1G69100		5.74025	5.53548e-09	2.95377e-08		AT2G39470	PNSL1	-2.49154	3.32359e-08	1.60072e-07
AT4G17660	PBL20	5.74001	7.45147e-47	4.01058e-45		AT5G53490		-2.49127	3.25772e-09	1.78019e-08
AT2G28420		5.73999	2.26092e-104	6.63137e-102		ATCG00580	PSBE	-2.49034	2.29196e-06	8.42786e-06
AT1G26400	FOX3	5.73894	3.10338e-08	1.50103e-07		AT4G01670		-2.48769	2.36812e-17	2.92557e-16
AT3G02935		5.73842	1.23831e-11	9.23831e-11		ATCG01060	PSAC	-2.48721	4.47926e-10	2.73705e-09
AT5G51610		5.73063	1.13334e-08	5.80663e-08		AT5G42710		-2.48479	0.000108919	0.000306415
AT5G57123		5.72916	2.28196e-24	4.3291e-23		AT3G57920	SPL15	-2.48387	0.0162788	0.0299445
AT1G69920	GSTU12	5.72595	3.84765e-13	3.36141e-12		AT3G23510		-2.48316	2.08672e-06	7.71773e-06
AT4G39500	CYP96A11	5.72554	4.24157e-28	9.96598e-27		AT1G25250	AtIDD16	-2.48182	7.14884e-05	0.000208181
AT5G57390	AIL5	5.72152	6.17089e-80	9.82225e-78		AT3G05727		-2.47428	3.05326e-07	1.27974e-06
AT5G57750	ATL50	5.72137	3.16735e-10	1.97517e-09		AT5G35740		-2.47277	1.35683e-10	8.90587e-10
AT2G08825		5.70953	6.94709e-46	3.62694e-44		AT4G13390		-2.47081	2.34295e-17	2.89723e-16
AT5G09640	SCPL19	5.70566	1.99947e-07	8.60866e-07		AT4G15760	MO1	-2.47021	3.4424e-16	3.89512e-15
AT5G11320	YUC4	5.70042	3.04888e-34	9.65872e-33		AT4G31850	PGR3	-2.47006	1.1936e-08	6.09619e-08
AT3G12470		5.6994	6.04613e-26	1.25659e-24		AT3G59580	NLP9	-2.46905	2.29434e-10	1.46413e-09
AT2G04495		5.69811	3.97037e-26	8.3989e-25		AT5G54090		-2.46901	4.58715e-07	1.87303e-06
AT4G01360		5.69616	2.64615e-51	1.69302e-49		ATCG00630	PSAJ	-2.46822	4.12377e-11	2.88521e-10
AT3G51590	LTP12	5.69446	8.84999e-09	4.60383e-08		AT1G09907		-2.46818	0.0156326	0.0288922
AT5G03210		5.68988	1.84821e-31	5.12162e-30		AT3G22150	PCMP-E95	-2.46808	3.21251e-16	3.64447e-15
AT5G66980		5.68865	9.25989e-09	4.80653e-08		AT3G18890	TIC62	-2.4676	1.86097e-09	1.04515e-08
AT1G65550	NAT10	5.68583	1.65607e-08	8.3023e-08		AT4G01820	ABCB3	-2.46592	1.4708e-05	4.82395e-05
AT5G20100		5.68059	1.006e-08	5.19189e-08		AT1G04353		-2.46223	2.33172e-05	7.40477e-05
AT5G22570	WRKY38	5.67863	6.35141e-39	2.51971e-37		AT3G22570		-2.46164	0.00100473	0.00237891
AT1G66770	SWEET6	5.67127	2.77402e-08	1.35074e-07		AT1G23540	PERK12	-2.46152	0.000891323	0.00212835
AT1G54957		5.66672	7.88551e-08	3.60749e-07		AT4G18830	OFP5	-2.46041	8.82033e-08	4.00219e-07
AT1G74190	AtRLP15	5.66584	2.28812e-08	1.12633e-07		AT5G46890		-2.458	9.46215e-06	3.197e-05
AT1G70840	MLP31	5.66382	1.64337e-08	8.24496e-08		AT5G13660		-2.45799	6.54063e-09	3.45971e-08
AT3G25240		5.6605	9.35035e-34	2.90228e-32		AT5G46240	KAT1	-2.45734	4.58643e-13	3.97227e-12
AT2G17845		5.65858	1.10642e-11	8.3257e-11		AT4G18390	TCP2	-2.45392	3.51034e-06	1.2594e-05
AT1G62000		5.65854	1.08772e-08	5.58715e-08		AT3G46710	RPP13L2	-2.45127	0.00328918	0.00702566
AT1G09935		5.65081	1.6782e-08	8.40194e-08		AT1G13300	HRS1	-2.45022	5.08162e-19	7.01855e-18
AT1G68765	IDA	5.64896	9.04721e-29	2.20101e-27		AT2G13960		-2.44981	4.12754e-05	0.000125563
AT5G66830		5.64891	3.89207e-35	1.28119e-33		AT1G27480	LCAT1	-2.44973	2.62066e-08	1.2806e-07
AT1G14550	PER5	5.64837	3.94776e-08	1.88258e-07		AT2G16380	SFH7	-2.4496	1.04787e-07	4.7064e-07
AT3G05260		5.64686	7.97056e-14	7.3965e-13		AT1G07560		-2.44912	6.36687e-09	3.37532e-08
AT4G16820	PLA-I{beta]2	5.64219	1.99534e-54	1.43489e-52		AT5G58260	ndhN	-2.44629	9.12449e-10	5.35008e-09
AT3G12320	LNK3	5.64132	4.61555e-96	1.09531e-93		AT5G36120	CCB3	-2.44559	8.08772e-09	4.23005e-08
AT2G01790		5.63899	3.75e-08	1.79318e-07		AT1G75190		-2.44327	1.21677e-05	4.04979e-05
AT5G55250	IAMT1	5.63724	1.71518e-69	1.86554e-67		AT1G09340	CRB	-2.44173	6.78116e-09	3.58041e-08
AT1G59630		5.63703	3.47374e-08	1.66872e-07		AT5G59330		-2.44081	0.00633993	0.0127541
AT2G27670		5.63327	3.17585e-08	1.53353e-07		AT5G56870	BGAL4	-2.44013	8.62137e-11	5.81151e-10
AT5G07600		5.63285	5.37513e-14	5.05995e-13		AT4G08400		-2.43841	1.56285e-17	1.95667e-16
AT1G09500		5.63085	7.04199e-30	1.81644e-28		AT3G47340	ASN1	-2.43676	5.09296e-07	2.06183e-06
AT2G39490		5.62837	1.34287e-08	6.8186e-08		ATCG00065	RPS12A	-2.43534	5.16082e-07	2.08733e-06
AT4G05005		5.62787	2.94358e-08	1.42903e-07		AT1G76952	IDL5	-2.43517	4.90045e-05	0.000147324
AT1G23700		5.62419	1.40602e-19	2.03226e-18		AT1G62780		-2.43291	1.67332e-09	9.45665e-09
AT3G03341		5.62401	2.87936e-48	1.61294e-46		AT1G49500		-2.43096	1.14236e-13	1.04486e-12
AT2G26130		5.6231	2.26515e-08	1.11628e-07		AT2G26420	PIP5K3	-2.43055	2.88997e-10	1.81302e-09
AT2G24195		5.6204	2.0632e-14	2.00886e-13		AT4G28850	XTH26	-2.43045	4.52971e-16	5.08137e-15
AT3G25260	NPF4.1	5.61612	4.73313e-08	2.22941e-07		AT3G25690	CHUP1	-2.42844	6.66072e-08	3.07955e-07
AT5G01120		5.61233	2.54637e-64	2.43837e-62		AT5G64380		-2.42751	6.16915e-15	6.26613e-14
AT5G09570		5.60495	1.05759e-62	9.61923e-61		AT2G03310		-2.42585	2.73028e-12	2.17489e-11
AT4G27330	SPL	5.60345	3.13302e-08	1.51424e-07		AT5G50820	anac097	-2.42508	1.67629e-05	5.44522e-05
AT1G30660		5.60027	4.03616e-26	8.51736e-25		AT1G28330	DRM1	-2.42456	2.37903e-13	2.11953e-12
AT1G24010		5.5964	3.3912e-15	3.51425e-14		AT4G12320	CYP706A6	-2.42315	6.43788e-05	0.000189336
AT2G44798		5.59391	6.22209e-38	2.35053e-36		AT2G38300		-2.42223	3.53594e-07	1.46955e-06
AT4G30070	PDF3.2	5.59357	3.19022e-08	1.5399e-07		AT1G22740	RABG3B	-2.4212	2.74454e-06	9.99071e-06
AT4G11170		5.59268	8.96193e-32	2.54009e-30		AT4G37410	CYP81F4	-2.42002	3.63751e-25	7.24284e-24
AT5G06845		5.59044	5.87117e-36	2.02458e-34		AT3G20420	RTL2	-2.41742	0.00546964	0.0111529
AT1G61440		5.59004	2.78072e-46	1.46052e-44		AT1G06460	ACD32.1	-2.41696	4.92868e-25	9.7321e-24
AT5G41763		5.5867	3.0786e-22	5.28709e-21		AT4G22475		-2.4158	0.0262866	0.0459848
AT4G04645		5.58176	2.00235e-08	9.93149e-08		AT1G35240	ARF20	-2.41498	0.0173838	0.0317266
AT4G12960	GILT	5.58153	1.48868e-19	2.14343e-18		AT1G51830		-2.41433	1.13205e-16	1.33595e-15
AT1G24590	ESR2	5.56804	4.43269e-08	2.09882e-07		AT1G23390		-2.41413	5.53268e-17	6.68635e-16
AT3G14360		5.56646	2.30779e-107	7.43735e-105		AT4G01770	RGXT1	-2.41366	3.08439e-09	1.68972e-08
AT3G30460		5.55941	3.51417e-36	1.21663e-34		AT1G63180	UGE3	-2.4126	2.20712e-08	1.08974e-07
AT3G11050	FER2	5.55415	7.45943e-36	2.5487e-34		AT3G59200		-2.41231	7.11175e-06	2.44817e-05
AT4G18990	XTH29	5.54754	1.68246e-26	3.64775e-25		AT2G10940		-2.41094	6.68474e-06	2.30971e-05
AT3G28150	AXY4L	5.54622	2.1369e-72	2.53553e-70		AT4G00880		-2.41026	4.52213e-12	3.53642e-11
AT5G36960		5.54142	6.22632e-36	2.13858e-34		AT2G46495	ATL21A	-2.40845	0.0162562	0.0299092
AT5G06500	AGL96	5.53682	2.63413e-08	1.2867e-07		AT5G57887		-2.40822	6.74381e-16	7.41848e-15
AT1G04890		5.52863	3.05649e-08	1.47972e-07		AT3G57180	BPG2	-2.40813	2.30139e-25	4.61763e-24
AT1G30515		5.52778	4.05494e-32	1.16962e-30		AT2G26211	MIR825A	-2.40794	0.000883431	0.00211099
AT5G43064		5.52759	3.53821e-08	1.69813e-07		AT5G41300	CRRSP59	-2.40787	0.027096	0.0472236
AT2G41260	M17	5.52186	2.91665e-41	1.25845e-39		AT2G36430		-2.40604	3.56485e-08	1.70998e-07
AT1G06023		5.52147	4.06096e-08	1.93268e-07		AT4G38160	pde191	-2.4049	7.82227e-11	5.30095e-10
AT3G26010		5.52027	6.86816e-08	3.17097e-07		AT1G49220	ATL10	-2.40412	0.0186651	0.0338169
AT5G53740		5.50974	1.77411e-29	4.48319e-28		AT5G45240		-2.40381	0.0013196	0.00305244
AT2G14060		5.50248	5.18348e-14	4.88658e-13		AT2G35890	CPK25	-2.40264	1.08552e-06	4.18496e-06
AT5G63070	RPS15F	5.50059	1.82149e-13	1.63959e-12		AT4G29060	emb2726	-2.40147	1.72221e-08	8.60907e-08
AT1G17615		5.49983	7.09586e-08	3.27031e-07		AT3G61920		-2.40126	0.00388698	0.00817941
AT3G10780		5.49185	1.26822e-57	1.00932e-55		AT1G32470	GDH3	-2.39995	2.00722e-10	1.29183e-09
AT1G78520		5.49148	2.68204e-15	2.80722e-14		AT1G42550	PMI1	-2.39962	4.58732e-08	2.1662e-07
AT2G43860		5.48991	7.49445e-08	3.43943e-07		AT1G26600	CLE9	-2.39886	2.15135e-05	6.8721e-05
AT4G18660		5.48582	3.91783e-11	2.7507e-10		AT4G15740		-2.39834	2.42834e-05	7.68493e-05
AT3G19500	BHLH113	5.47975	1.27186e-50	7.92376e-49		AT3G12685		-2.39824	1.06974e-12	8.87337e-12
AT3G05540		5.47735	8.91287e-08	4.04348e-07		AT4G04695	CPK31	-2.39724	4.61396e-23	8.26082e-22
AT1G03790	SOM	5.47266	1.13599e-47	6.29593e-46		AT3G29190	TPS15	-2.39525	0.0178012	0.0324092
AT3G16150		5.47201	1.35712e-65	1.33684e-63		AT5G35750	AHK2	-2.39438	1.39173e-06	5.28508e-06
AT3G57690	AGP23	5.47125	5.103e-08	2.39154e-07		AT4G15400	BIA1	-2.39295	1.3484e-11	1.0011e-10
AT1G11620		5.46839	1.58661e-07	6.95147e-07		AT3G23700		-2.39146	1.32867e-09	7.63114e-09
AT1G48530		5.46124	6.17638e-13	5.28271e-12		AT4G06410		-2.39138	2.82727e-15	2.9533e-14
AT3G61680	PLIP1	5.46013	6.81483e-40	2.81034e-38		AT1G52750		-2.3907	2.69231e-10	1.70046e-09
AT1G19470		5.4568	9.0019e-08	4.08103e-07		AT5G18130		-2.38831	1.70941e-28	4.09379e-27
AT5G04380		5.45187	5.56518e-07	2.24057e-06		AT4G22513		-2.38788	2.03958e-06	7.55837e-06
AT3G48230		5.44957	1.1083e-07	4.9616e-07		AT1G70700	JAZ9	-2.38653	4.58239e-07	1.87167e-06
AT3G05035		5.44798	8.95806e-16	9.76781e-15		AT4G29030		-2.38582	1.08923e-13	9.99059e-13
AT2G43580		5.44617	8.33128e-08	3.79877e-07		AT3G14415		-2.38531	1.02146e-08	5.26651e-08
AT2G27250	CLV3	5.44165	1.40395e-11	1.03938e-10		AT3G53460	CP29	-2.38413	7.51674e-10	4.46049e-09
AT4G00120	IND	5.44146	1.38803e-11	1.02818e-10		AT2G36100	CASP1	-2.38362	8.24455e-08	3.76383e-07
AT5G50260	CEP1	5.44046	2.05157e-39	8.34176e-38		AT3G30530	ATBZIP42	-2.3833	0.0209218	0.0374583
AT5G24640		5.43927	1.90146e-57	1.49957e-55		AT4G17220	MAP70.5	-2.3827	2.03383e-07	8.74827e-07
AT2G19893		5.43581	1.98478e-07	8.55527e-07		AT3G62960	GRXC14	-2.37825	0.00648318	0.0130192
AT4G20700		5.43526	2.3822e-15	2.50746e-14		AT5G06200	CASP4	-2.37745	8.21335e-17	9.79896e-16
AT5G54470		5.43056	2.83673e-37	1.03566e-35		AT3G46270		-2.37697	0.00291211	0.00629546
AT5G01675		5.42773	1.57062e-21	2.57373e-20		AT5G07152		-2.37388	1.20168e-10	7.96362e-10
AT3G48630		5.42743	8.2002e-08	3.74446e-07		AT2G27740		-2.37191	9.96749e-09	5.14721e-08
AT5G63750	ARI13	5.42594	2.74233e-31	7.53535e-30		AT2G34430	LHB1B1	-2.37105	0.00211551	0.00470185
AT1G61550		5.42499	1.38265e-37	5.14141e-36		AT2G47370		-2.37015	1.62809e-15	1.74465e-14
AT3G27785	MYB118	5.42347	2.8805e-11	2.05332e-10		AT4G26520		-2.36986	1.27518e-12	1.04941e-11
AT4G30380		5.4147	7.85066e-08	3.59344e-07		AT5G23030	TET12	-2.36905	0.00362115	0.00767634
AT3G01516		5.40683	1.38277e-43	6.58682e-42		AT5G07280	EMS1	-2.36701	3.43369e-05	0.000105987
AT4G28405		5.4064	4.18179e-11	2.92032e-10		AT5G61070	HDA18	-2.367	0.0070669	0.0140863
AT5G53240		5.39611	2.51133e-11	1.80346e-10		AT2G03420		-2.36268	6.88616e-09	3.63291e-08
AT3G22231	PCC1	5.39305	1.89332e-19	2.7022e-18		AT1G49130		-2.36201	1.33864e-07	5.92871e-07
AT5G28000		5.3914	2.53775e-07	1.07594e-06		AT2G15880	PEX3	-2.36184	1.73552e-16	2.01798e-15
AT3G18250		5.38971	4.03875e-76	5.63784e-74		AT2G22750		-2.3614	0.022413	0.0398549
AT1G67000	LRK10L-2.8	5.38968	1.01017e-07	4.55036e-07		AT2G29620		-2.36076	2.83612e-08	1.37866e-07
AT2G39330	JAL23	5.38886	2.32769e-26	4.99689e-25		AT1G29420		-2.35936	0.0206536	0.0370188
AT1G26680		5.38022	5.66176e-111	1.99722e-108		AT2G42850	CYP718	-2.35862	0.000159763	0.000436149
AT3G28580		5.38014	1.04629e-108	3.50158e-106		AT2G20710		-2.35725	2.55731e-18	3.39036e-17
AT2G03505		5.37915	3.26795e-39	1.31443e-37		AT5G53190	SWEET3	-2.35616	0.0266963	0.0466266
AT3G48840		5.37781	8.29044e-11	5.59753e-10		AT3G28550		-2.3558	1.57606e-08	7.93165e-08
AT5G26890		5.37736	9.78049e-10	5.71036e-09		AT1G01790	KEA1	-2.3542	5.15368e-09	2.76019e-08
AT5G06585		5.37268	4.47117e-18	5.83578e-17		AT2G41560	ACA4	-2.35194	5.01744e-06	1.76398e-05
AT5G26090		5.37086	1.77683e-10	1.14979e-09		ATCG00070	PSBK	-2.34945	7.97247e-13	6.73624e-12
AT2G24850	TAT3	5.36916	5.98044e-19	8.20785e-18		AT2G15090	KCS8	-2.34789	1.99905e-06	7.41642e-06
AT2G36660	PAB7	5.36024	2.44248e-54	1.75161e-52		AT2G47200		-2.34767	3.00482e-09	1.64924e-08
AT2G26010	PDF1.3	5.35892	5.98028e-16	6.6204e-15		AT1G21470		-2.34712	0.00497031	0.0102194
AT2G24800	PER18	5.35817	9.66591e-57	7.50949e-55		ATCG00660	RPL20	-2.34454	1.5663e-13	1.4187e-12
AT3G50610	CEP9	5.35244	4.69939e-07	1.91527e-06		AT1G76080	CDSP32	-2.34417	6.31914e-10	3.79468e-09
AT1G43800	S-ACP-DES6	5.35104	8.94789e-73	1.07639e-70		AT2G45180		-2.34281	5.84344e-06	2.0341e-05
AT2G01422		5.34893	2.69664e-07	1.13905e-06		AT3G10710	PME24	-2.34183	8.58223e-17	1.02157e-15
AT1G08170		5.34795	2.19034e-07	9.384e-07		AT3G27920	GL1	-2.3418	0.0225689	0.0400938
AT3G17190		5.34601	1.91691e-07	8.28735e-07		AT1G68350		-2.34175	1.38734e-05	4.56341e-05
AT5G25180	CYP71B14	5.34208	4.61577e-13	3.99636e-12		AT3G46130	ATMYB48	-2.34051	2.55613e-12	2.0424e-11
AT5G24200		5.34027	1.21385e-35	4.1151e-34		AT3G15360	ATHM4	-2.3394	3.78243e-11	2.66064e-10
AT1G09037		5.33927	2.40239e-07	1.02137e-06		AT3G51895	SULTR3	-2.33825	6.09774e-05	0.000180022
AT2G04500		5.33834	1.59738e-119	6.72547e-117		AT4G37925	NDHM	-2.33764	6.71217e-10	4.0104e-09
AT4G19730		5.3377	1.43948e-07	6.35378e-07		AT1G21680		-2.33604	3.18609e-33	9.64844e-32
AT2G25130		5.32698	1.40514e-33	4.33567e-32		AT1G12080		-2.33537	0.0030512	0.00656624
AT3G15990	SULTR3	5.32337	4.8722e-85	8.83222e-83		AT1G54820		-2.33505	1.28575e-10	8.46912e-10
AT5G23180		5.32205	2.01545e-07	8.67313e-07		AT2G04790		-2.33459	6.10017e-08	2.83343e-07
AT2G26960	AtMYB81	5.30801	2.19222e-07	9.38884e-07		AT5G08610	RH26	-2.33388	1.93233e-15	2.05632e-14
AT1G59670	GSTU15	5.3055	1.76194e-09	9.93813e-09		AT4G25050	ACP4	-2.33309	6.87175e-11	4.68233e-10
AT4G33720		5.30422	4.14585e-18	5.42201e-17		AT3G25717	RTFL16	-2.3316	3.72691e-25	7.4039e-24
AT1G02040		5.30194	2.16373e-22	3.7455e-21		AT5G56100		-2.32881	1.00875e-24	1.95926e-23
AT1G48000	MYB112	5.30069	5.9914e-21	9.47301e-20		AT3G02242	GLV8	-2.32772	0.0246702	0.0434425
AT1G04600	XI-A	5.29569	1.34467e-53	9.33542e-52		AT2G18560		-2.32302	3.74085e-07	1.54683e-06
AT1G05647		5.29499	1.94212e-07	8.38784e-07		AT4G10910		-2.32254	0.00114196	0.00267663
AT3G03660	WOX11	5.29024	3.39254e-27	7.62124e-26		AT3G01760		-2.32155	0.0244822	0.0431521
AT1G54870		5.28641	2.09251e-06	7.73806e-06		AT4G08300		-2.31977	2.16726e-10	1.39003e-09
AT4G11393		5.28593	4.2571e-07	1.74591e-06		AT4G02510	TOC159	-2.31769	1.18811e-11	8.89941e-11
AT3G21500	DXPS1	5.28569	1.4611e-20	2.26354e-19		AT2G30280	RDM4	-2.31706	5.37394e-27	1.19287e-25
AT2G08295		5.2818	2.98943e-13	2.63903e-12		AT5G21940		-2.31704	1.32064e-12	1.08511e-11
AT5G14860		5.27346	1.42888e-15	1.53685e-14		AT1G77210	STP14	-2.31698	3.20841e-08	1.5481e-07
AT3G46613	RTFL4	5.26637	2.34183e-07	9.9741e-07		AT3G20865	AGP40	-2.31638	1.26022e-05	4.17685e-05
AT1G23110		5.26329	1.6548e-192	2.541e-189		AT1G69320	CLE10	-2.31535	1.53807e-05	5.0313e-05
AT5G41765		5.26031	1.47941e-20	2.29054e-19		AT2G43440		-2.31496	1.92848e-07	8.33461e-07
AT2G40790	CXXS2	5.25789	1.56275e-12	1.27641e-11		AT4G08290		-2.31424	7.68709e-06	2.63166e-05
AT5G45630		5.25249	1.56853e-35	5.28321e-34		AT5G51910	TCP19	-2.31283	9.83504e-13	8.18406e-12
AT5G13320	PBS3	5.25233	4.9642e-22	8.37116e-21		AT2G20550		-2.31279	1.88627e-14	1.84279e-13
AT3G60470		5.24133	4.16002e-07	1.71003e-06		AT3G19320		-2.31169	0.0267401	0.0467
AT5G08930		5.2404	3.39969e-07	1.41653e-06		ATCG00360	YCF3	-2.31095	3.95065e-08	1.8834e-07
AT2G42660		5.23628	5.51787e-49	3.17966e-47		AT5G53460	GLT1	-2.31053	1.10707e-11	8.32824e-11
AT4G04510	CRK38	5.2355	4.34641e-12	3.40512e-11		AT2G03550	CXE7	-2.31003	3.35498e-07	1.39924e-06
AT5G39930	CLPS5	5.23528	3.15971e-07	1.32181e-06		AT2G44930		-2.30854	2.8776e-05	9.00357e-05
AT3G28155		5.234	9.83102e-57	7.6151e-55		AT4G05070		-2.30698	1.095e-14	1.09265e-13
AT1G50880		5.23015	3.13895e-07	1.31355e-06		AT1G61080		-2.30654	7.05909e-07	2.80387e-06
AT1G17285		5.22664	1.06437e-27	2.44797e-26		AT2G32870		-2.30441	7.6274e-07	3.01082e-06
AT1G56040	PUB58	5.2228	5.54701e-07	2.23387e-06		AT1G64770	NDF2	-2.30268	8.34148e-08	3.80276e-07
AT1G30814		5.22108	3.87196e-07	1.59851e-06		AT1G22690	GASA9	-2.30166	2.1034e-21	3.42955e-20
AT3G02410	ICMEL2	5.2198	1.8836e-71	2.16606e-69		AT2G41240	BHLH100	-2.29903	3.5786e-05	0.000110186
AT1G66110		5.21616	3.35332e-07	1.39877e-06		AT4G34138	UGT73B1	-2.29901	2.13194e-14	2.07348e-13
AT3G21000		5.21122	1.41546e-14	1.39589e-13		AT1G70290	TPS8	-2.2987	9.48106e-12	7.19877e-11
AT5G63225		5.21094	7.64021e-07	3.01542e-06		AT1G13650		-2.29854	1.30449e-05	4.31096e-05
AT5G02210		5.21005	1.79115e-10	1.15762e-09		AT3G23080		-2.29837	3.78839e-07	1.56549e-06
AT3G27475		5.20467	5.00043e-43	2.34347e-41		AT2G28605	PPD2	-2.29806	1.21966e-11	9.11742e-11
AT2G24210	TPS10	5.19547	4.59855e-07	1.87739e-06		AT1G43650		-2.29672	0.000191833	0.000516942
AT2G31920		5.19257	3.72342e-23	6.70318e-22		AT5G07015		-2.29562	0.00989734	0.0191024
AT3G26830	CYP71B15	5.19023	4.83062e-49	2.78979e-47		AT4G25990	CIL	-2.29558	6.32015e-29	1.55203e-27
AT5G66970		5.18593	3.93249e-07	1.62145e-06		AT1G02570		-2.29443	0.0251427	0.0442059
AT3G48300	CYP71A23	5.18319	1.15897e-18	1.56512e-17		AT1G45191	BGLU1	-2.29253	1.38323e-05	4.5516e-05
AT5G55650		5.18	1.46e-19	2.10477e-18		AT3G02465		-2.29237	0.00146967	0.00336558
AT2G19590	ACO1	5.17711	2.06934e-62	1.86269e-60		AT2G39730	RCA	-2.29227	8.5643e-07	3.35932e-06
AT5G55270		5.17296	3.52601e-11	2.49371e-10		AT5G43230		-2.2914	6.38353e-05	0.000187801
AT3G55240		5.17042	2.82212e-55	2.08104e-53		AT4G37940	AGL21	-2.29069	6.34392e-11	4.34194e-10
AT2G45135		5.16892	7.56615e-08	3.47051e-07		AT2G23600	ACL	-2.28673	1.22433e-05	4.07236e-05
AT2G30750	CYP71A12	5.16531	4.86228e-59	4.05511e-57		AT3G20680		-2.28472	3.71314e-15	3.82811e-14
AT4G25200	HSP23.6	5.16528	3.45289e-28	8.15694e-27		AT1G12480	SLAC1	-2.28432	7.03924e-06	2.42577e-05
AT5G19880	PER58	5.16472	7.53941e-13	6.38989e-12		AT5G61350		-2.28384	3.64731e-09	1.98188e-08
AT3G54450	NPF5.4	5.16045	8.77955e-10	5.16407e-09		AT1G72230		-2.28298	3.00546e-08	1.45664e-07
AT1G72660	DRG2	5.15734	2.73949e-37	1.00157e-35		AT3G25190		-2.2824	3.51704e-38	1.34617e-36
AT3G22235		5.15243	2.35812e-53	1.61142e-51		AT2G03530	UPS2	-2.28142	2.25074e-15	2.38061e-14
AT4G04500	CRK37	5.15235	5.53198e-20	8.2377e-19		AT5G03260	LAC11	-2.27763	2.48381e-07	1.05427e-06
AT2G33460	RIC1	5.14783	2.6138e-64	2.49017e-62		AT3G53800	Fes1B	-2.27615	8.77266e-23	1.54626e-21
AT4G03450		5.14689	1.36268e-20	2.11609e-19		AT4G22517		-2.26968	5.76305e-10	3.48318e-09
AT1G07175		5.14633	8.05482e-54	5.622e-52		AT1G78110		-2.26934	1.32598e-12	1.08865e-11
AT5G36907		5.14033	5.38756e-34	1.68427e-32		AT5G06480		-2.26886	0.000365428	0.000935667
AT3G57950		5.13525	5.18755e-24	9.70723e-23		AT2G30670		-2.26696	0.000143631	0.000395292
AT4G01970	AtSTS	5.13411	1.06433e-22	1.86967e-21		AT1G18730	PNSB4	-2.26688	4.40349e-10	2.6939e-09
AT1G35537		5.12848	9.02746e-07	3.5251e-06		AT1G47655	DOF1.6	-2.26355	8.63328e-07	3.38383e-06
AT3G22490	RAB28	5.12825	1.00403e-06	3.89322e-06		AT1G76892		-2.26281	0.0286719	0.0496881
AT5G53870	ENODL1	5.12	1.66324e-99	4.29873e-97		AT2G45470	FLA8	-2.26231	6.32437e-07	2.52704e-06
AT2G47950		5.11256	2.67999e-13	2.37711e-12		AT1G29430	SAUR62	-2.26184	3.72203e-07	1.54026e-06
AT4G04565		5.1053	1.39587e-31	3.90544e-30		AT2G24630	CSLC8	-2.26117	2.64112e-10	1.66975e-09
AT2G07045		5.09854	8.29585e-07	3.26137e-06		AT3G05900		-2.26094	5.30069e-06	1.85905e-05
AT1G79800	ENODL7	5.09783	7.40111e-07	2.92509e-06		AT5G48920	TED7	-2.26071	0.000588206	0.00145279
AT1G27040	NPF4.5	5.09738	1.25319e-30	3.34151e-29		AT3G55940	PLC7	-2.26002	3.93743e-09	2.1311e-08
AT1G10370	GSTU17	5.09729	7.09666e-56	5.32331e-54		AT1G62750	CPEFG	-2.25949	6.12424e-13	5.24154e-12
AT5G52300	LTI65	5.09687	6.34727e-55	4.62819e-53		AT2G21880	RABG2	-2.25805	3.81329e-10	2.34825e-09
AT1G07985		5.09403	1.59404e-43	7.56563e-42		AT5G23270	STP11	-2.25692	6.27957e-05	0.000185055
AT4G25010	SWEET14	5.08944	7.83473e-07	3.08799e-06		AT4G06075		-2.25642	5.13407e-09	2.75082e-08
AT1G11040		5.08298	8.42178e-17	1.00293e-15		AT5G05580	FAD8	-2.25632	5.6756e-11	3.90912e-10
AT1G05077		5.07582	8.9093e-07	3.48104e-06		AT3G27860		-2.25577	1.60466e-07	7.01994e-07
AT1G75870		5.07326	1.19003e-06	4.56159e-06		AT5G61200		-2.25541	6.47237e-05	0.000190264
AT1G21850	sks8	5.07176	9.33155e-07	3.63731e-06		AT5G18770		-2.25448	3.15206e-16	3.58057e-15
AT4G05755		5.06773	3.27485e-24	6.18126e-23		AT3G54050	CFBP1	-2.25433	1.2221e-10	8.09074e-10
AT1G24580		5.06474	1.79782e-26	3.88495e-25		AT1G26360	MES13	-2.2543	1.0016e-09	5.8387e-09
AT5G64080		5.061	1.26506e-49	7.52237e-48		AT3G49790		-2.24759	1.31248e-08	6.67205e-08
AT1G51010		5.06077	2.45313e-08	1.20211e-07		AT1G74880	ndhO	-2.24553	1.21188e-09	6.99888e-09
AT5G46960	PMEI12	5.05478	1.32598e-10	8.71217e-10		AT1G43560	Aty2	-2.24412	3.98525e-11	2.79353e-10
AT3G23950		5.05173	4.44781e-08	2.1052e-07		AT3G48390		-2.24315	1.46666e-12	1.19942e-11
AT2G38340	DREB2E	5.04905	1.52061e-33	4.68642e-32		AT5G15780		-2.24188	5.25889e-06	1.84489e-05
AT4G25930		5.04837	1.87026e-06	6.97149e-06		AT2G20520	FLA6	-2.2413	1.18965e-17	1.50168e-16
AT1G11510		5.04506	1.43926e-06	5.45051e-06		AT3G47860	CHL	-2.24055	3.25891e-15	3.38522e-14
AT5G07490		5.04498	2.00585e-06	7.43972e-06		AT3G49940	LBD38	-2.23854	7.54729e-10	4.47658e-09
AT5G36240		5.0388	1.09735e-06	4.22806e-06		AT3G48260	WNK3	-2.2379	1.42868e-09	8.16422e-09
AT1G77150		5.03669	1.13141e-06	4.35082e-06		AT1G79510		-2.23754	9.61767e-16	1.04783e-14
AT3G22910	ACA13	5.03579	3.28188e-148	2.31541e-145		ATCG00500	ACCD	-2.23718	1.08031e-07	4.84378e-07
AT1G04380		5.02978	3.59079e-16	4.05599e-15		AT2G36830	TIP1-1	-2.2362	7.86031e-08	3.59722e-07
AT2G24560		5.02889	2.84598e-39	1.14825e-37		AT5G45930	CHLI2	-2.23536	2.24641e-10	1.43656e-09
AT5G20810		5.02449	1.70158e-26	3.68614e-25		AT1G64780	AMT1-2	-2.23452	6.04586e-16	6.69017e-15
AT1G22110		5.02357	2.88865e-38	1.11217e-36		AT5G26742	RH3	-2.23246	3.87261e-13	3.38096e-12
AT2G15780		5.01307	1.2024e-06	4.60632e-06		AT5G23750		-2.23239	1.86424e-15	1.98629e-14
AT2G18150	PER15	5.01205	1.66037e-83	2.85147e-81		AT1G18990	MYOB5	-2.2316	0.00609998	0.0123217
AT5G40155		5.00777	2.37966e-06	8.7282e-06		ATCG00690	PSBT	-2.22852	8.46532e-06	2.87958e-05
AT2G32160		5.00774	1.31235e-31	3.67965e-30		AT3G21180	ACA9	-2.22831	7.54211e-08	3.4607e-07
AT3G11260	WOX5	5.00314	1.21402e-31	3.41129e-30		AT1G23870	TPS9	-2.22676	1.7391e-10	1.12649e-09
AT5G61610		4.99662	3.6952e-56	2.78785e-54		AT1G21100	IGMT1	-2.22632	3.36759e-08	1.62131e-07
AT1G07143		4.98936	8.31506e-10	4.9019e-09		AT1G14160		-2.22625	0.000254395	0.000670627
AT5G53820		4.98358	5.20676e-39	2.07507e-37		AT5G47560	TDT	-2.22431	7.7926e-07	3.07232e-06
AT1G80540		4.97913	1.16585e-13	1.06522e-12		AT1G62400	HT1	-2.22417	5.34237e-06	1.87216e-05
AT5G65230	AtMYB53	4.97776	1.22419e-50	7.64502e-49		AT4G27520	ENODL2	-2.224	6.51728e-06	2.25453e-05
AT4G25000	AMY1	4.97741	1.26684e-23	2.32067e-22		AT1G58602		-2.22261	5.48261e-09	2.92795e-08
AT1G32900	GBSS1	4.97629	1.88999e-44	9.34401e-43		AT4G13620	ERF062	-2.22231	7.71575e-12	5.92388e-11
AT1G20730		4.97626	1.52216e-06	5.74031e-06		AT3G06220		-2.22208	0.00991192	0.0191263
AT3G10815		4.97139	4.50816e-125	2.13965e-122		AT2G45560	CYP76C1	-2.22179	2.069e-15	2.19193e-14
AT1G11230		4.97015	4.63512e-06	1.6395e-05		AT1G55490	CPN60B1	-2.22159	2.96191e-08	1.43686e-07
AT1G25422		4.96963	1.28729e-12	1.05904e-11		AT3G23930		-2.22078	3.14147e-05	9.7648e-05
AT5G65225		4.96892	2.2331e-13	1.9929e-12		AT5G51110	ATP1	-2.22005	3.07557e-09	1.68559e-08
AT2G30690	MYOB4	4.96011	5.13212e-15	5.23725e-14		AT5G09220	AAP2	-2.2198	2.50044e-10	1.5858e-09
AT3G11160		4.95734	9.91689e-09	5.12209e-08		AT3G24360		-2.21803	0.0098892	0.0190909
AT1G20180		4.957	2.76735e-06	1.00653e-05		AT5G24420	PGL5	-2.21792	0.0013522	0.00312038
AT3G45093		4.95167	3.11649e-08	1.50681e-07		AT4G00670		-2.21453	7.59016e-21	1.19358e-19
AT2G47770	TSPO	4.94905	1.25184e-14	1.24062e-13		AT4G13500		-2.21431	5.58635e-09	2.97908e-08
AT2G32370	HDG3	4.94795	4.7885e-06	1.68986e-05		AT5G22890	STOP2	-2.21303	1.17565e-20	1.83218e-19
AT1G04103		4.94317	1.08599e-07	4.8659e-07		AT1G11450		-2.20953	1.60218e-07	7.01145e-07
AT5G35600	HDA7	4.94232	2.11334e-06	7.80953e-06		AT4G34830	MRL1	-2.2089	1.37644e-09	7.89161e-09
AT5G05290	EXPA2	4.9394	1.86897e-23	3.40696e-22		AT1G76955		-2.20835	1.09847e-07	4.91929e-07
AT1G61120	GES	4.93775	1.16288e-32	3.43392e-31		AT1G09890		-2.20755	9.75225e-05	0.000277011
AT1G07887		4.93686	3.43333e-12	2.71094e-11		AT4G09990	GXM2	-2.2073	2.0348e-18	2.71417e-17
AT2G04050	DTX3	4.93665	9.72587e-58	7.76404e-56		AT2G39430	DIR9	-2.20456	1.39367e-10	9.13158e-10
AT1G65500		4.93176	8.76505e-46	4.56692e-44		AT4G21280	PSBQ1	-2.20337	9.44635e-08	4.27065e-07
AT5G13790	AGL15	4.93008	1.82616e-69	1.97137e-67		AT1G49230	ATL78	-2.20307	3.39537e-07	1.41498e-06
AT2G29380	HAI3	4.92726	1.13158e-24	2.18806e-23		AT3G18870		-2.20299	1.67082e-14	1.63905e-13
AT4G03500		4.92593	2.05913e-46	1.08809e-44		AT1G17610	CHS1	-2.20193	0.0198504	0.0357338
AT4G34210	ASK11	4.92036	1.63979e-15	1.75503e-14		AT4G38840		-2.2015	5.83378e-07	2.34105e-06
AT3G62760	GSTF13	4.91863	1.16485e-26	2.54881e-25		AT1G50280		-2.20065	6.11284e-06	2.12278e-05
AT2G15590		4.91813	1.75361e-08	8.75764e-08		AT3G50460	HR2	-2.20005	0.0107375	0.0205583
AT2G44400		4.91355	2.82396e-06	1.02598e-05		AT2G18640	GGPP4	-2.20001	0.0119796	0.0227348
AT3G12410		4.91147	1.74362e-15	1.86081e-14		AT1G30250		-2.19984	0.00111601	0.00261864
AT3G04300		4.90952	8.82685e-49	5.05596e-47		AT4G39970		-2.19845	7.48583e-12	5.75752e-11
AT3G27040		4.90834	7.14009e-06	2.45631e-05		AT1G51270		-2.19835	2.57231e-10	1.629e-09
AT3G04430	anac049	4.90495	3.09332e-06	1.11808e-05		AT2G44920		-2.19771	1.45633e-06	5.51037e-06
AT1G18830	SEC31A	4.90186	8.86153e-32	2.51436e-30		AT5G55220	TIG	-2.19621	2.29329e-10	1.46402e-09
AT3G46120	PAP19	4.90007	3.89102e-06	1.38986e-05		AT5G28500	RAF1.1	-2.19548	1.40734e-09	8.05404e-09
AT3G45130	LAS1	4.89725	2.20709e-38	8.53538e-37		AT3G45330	LECRK11	-2.19421	0.0148573	0.0275941
AT2G23240	MT4B	4.89581	6.47227e-10	3.87594e-09		AT2G01530	MLP329	-2.19409	8.77814e-35	2.82894e-33
AT3G09450		4.89413	2.81589e-06	1.02319e-05		AT3G02510		-2.19308	5.13191e-11	3.55152e-10
AT4G25530	HDG6	4.88898	3.0659e-06	1.10879e-05		AT1G72300	PSY1R	-2.19228	1.06964e-08	5.50078e-08
AT5G50360		4.88827	9.03809e-06	3.06284e-05		AT4G22840	BASS6	-2.19218	7.79954e-16	8.54382e-15
AT1G23810		4.88707	3.29231e-06	1.18558e-05		AT2G05160		-2.18943	5.18991e-11	3.58975e-10
AT5G03005		4.88526	1.13007e-06	4.34643e-06		ATCG00710	PSBH	-2.18866	1.42106e-05	4.66903e-05
AT4G02690	LFG3	4.88211	6.33433e-17	7.63042e-16		AT5G06470		-2.18721	0.000136171	0.000376257
AT3G48510		4.88187	1.38614e-42	6.38161e-41		AT2G45350	CRR4	-2.18705	2.38453e-08	1.17136e-07
AT3G13890	MYB26	4.87873	3.09905e-06	1.11984e-05		AT4G29180	RHS16	-2.18696	7.20905e-08	3.32013e-07
AT5G09325		4.87851	1.10311e-11	8.30326e-11		AT1G33770		-2.18626	3.08826e-06	1.11656e-05
AT1G30220	INT2	4.87512	3.45078e-73	4.20931e-71		AT5G45950		-2.1836	2.48678e-11	1.7873e-10
AT5G46230		4.87291	2.62265e-41	1.13913e-39		AT3G14160		-2.18309	6.85929e-33	2.05103e-31
AT4G36280	MORC2	4.87214	5.48322e-96	1.2895e-93		AT1G12020		-2.18262	8.90574e-15	8.94136e-14
AT5G14180	LIP2	4.87016	2.63841e-182	3.1306e-179		AT5G25840		-2.1821	1.33889e-08	6.7997e-08
AT2G15400	NRPD3B	4.86958	6.17278e-28	1.43613e-26		AT1G30820		-2.182	7.6481e-13	6.47571e-12
AT3G47480	CML47	4.86431	7.37439e-38	2.77379e-36		AT2G17972		-2.18037	3.10397e-07	1.30031e-06
AT3G46070		4.86291	3.16818e-06	1.14388e-05		AT5G13650		-2.18031	9.24824e-18	1.17764e-16
AT4G05540		4.84699	5.32695e-06	1.86701e-05		AT2G02950	PKS1	-2.17755	3.72872e-06	1.33445e-05
AT5G51850		4.84659	2.79126e-49	1.63737e-47		AT2G25900	ATCTH	-2.1772	1.04286e-13	9.58211e-13
AT5G55135		4.84393	7.25762e-06	2.49379e-05		AT3G07105		-2.17695	0.000659088	0.00161245
AT4G25980	PER43	4.84224	2.3236e-66	2.36012e-64		AT4G18290	KAT2	-2.17682	5.8473e-09	3.10935e-08
AT2G11810	MGD3	4.84147	2.6237e-286	8.56113e-283		ATCG00520	YCF4	-2.17511	2.68682e-07	1.13545e-06
AT5G48350		4.83903	4.28413e-08	2.03444e-07		AT3G61430	PIP1-1	-2.17479	3.02287e-10	1.8923e-09
AT5G48130		4.83836	1.50035e-09	8.54759e-09		AT1G09750	AED3	-2.1746	0.000111596	0.00031317
AT2G43535	ATTI4	4.83749	7.31623e-45	3.70122e-43		AT1G18485	PCMP-H8	-2.17452	1.1062e-14	1.10299e-13
AT4G19810	ChiC	4.83739	3.83206e-72	4.50595e-70		AT4G34190	45901	-2.17437	2.73249e-11	1.95369e-10
AT1G53620		4.83092	9.60004e-09	4.97122e-08		AT3G01190	PER27	-2.17435	1.56317e-08	7.87437e-08
AT5G23970		4.83077	4.98037e-06	1.75189e-05		AT1G25450	KCS5	-2.17277	3.05942e-06	1.1066e-05
AT4G00893		4.83018	2.14875e-08	1.06233e-07		AT5G02090		-2.17216	3.11592e-12	2.46853e-11
AT3G22650	ATSFL61	4.82801	9.34413e-06	3.1608e-05		AT4G01915		-2.17205	4.46573e-15	4.57868e-14
AT1G12070		4.82473	7.99096e-89	1.61702e-86		AT5G42180	PER64	-2.17076	4.54361e-11	3.16031e-10
AT3G61910	NAC066	4.82284	4.24347e-06	1.50915e-05		AT1G20490		-2.17027	2.16937e-15	2.2964e-14
AT1G22240	APUM8	4.81736	4.51479e-06	1.60019e-05		AT2G13680	CALS5	-2.16925	0.0166919	0.030631
AT4G14980		4.81496	2.17986e-47	1.19294e-45		AT2G20670		-2.16635	4.21639e-10	2.5855e-09
AT3G12060	TBL1	4.81285	1.75054e-33	5.3571e-32		AT1G77490	APXT	-2.1659	9.58539e-09	4.96462e-08
AT1G58330	ZW2	4.81194	5.40294e-11	3.72979e-10		AT4G24972	TPD1	-2.16561	9.94543e-54	6.92308e-52
AT1G55740	RFS1	4.81142	1.19372e-63	1.11687e-61		AT1G55370	NDF5	-2.16532	6.88446e-08	3.17793e-07
AT3G21150	BBX32	4.806	1.18041e-10	7.83262e-10		AT5G04810	PPR4	-2.16532	6.09728e-14	5.71708e-13
AT5G35375		4.80017	3.01011e-08	1.45862e-07		AT5G15970	KIN2	-2.16508	5.13057e-16	5.72099e-15
AT1G77960		4.80012	5.4039e-20	8.06538e-19		AT1G79700		-2.16498	1.47462e-06	5.57325e-06
AT3G58360		4.79336	6.66735e-06	2.30461e-05		AT1G65230		-2.16484	2.29982e-14	2.22597e-13
AT2G16060	AHB1	4.79177	1.44377e-58	1.17776e-56		AT2G06850	XTH4	-2.16431	7.12744e-06	2.45261e-05
AT5G39470		4.79144	7.10173e-06	2.44505e-05		AT1G69080		-2.16378	8.33447e-09	4.35039e-08
AT1G71770	PAB5	4.78876	6.00815e-26	1.25069e-24		AT5G57180	CIA2	-2.1629	7.34967e-09	3.86028e-08
AT4G30290	XTH19	4.788	0	0		AT4G24700		-2.16265	3.36715e-06	1.21019e-05
AT5G37320		4.78595	5.12964e-06	1.80124e-05		AT1G25440	COL16	-2.16246	5.89777e-13	5.05434e-12
AT2G41070	EEL	4.7809	4.18955e-59	3.51653e-57		AT3G51910	HSFA7A	-2.16185	2.45945e-06	9.01199e-06
AT4G09589		4.78089	8.44576e-06	2.87405e-05		AT5G45540		-2.15901	0.00372962	0.00788643
AT5G02200	FHL	4.7764	7.31066e-75	9.54187e-73		AT3G11550	CASP2	-2.15779	1.40511e-06	5.33279e-06
AT1G74550	CYP98A9	4.77571	2.84472e-17	3.49616e-16		AT3G29375		-2.15731	3.20809e-20	4.87167e-19
AT5G09470	PUMP6	4.77501	8.81356e-24	1.63401e-22		AT5G04960	PME46	-2.15476	3.53772e-19	4.95433e-18
AT4G28410		4.77157	1.70098e-59	1.44633e-57		AT1G11860		-2.15427	3.07257e-10	1.92065e-09
AT1G66700	PXMT1	4.77107	4.92668e-13	4.25425e-12		AT2G19310	HSP18.5	-2.15235	1.33031e-35	4.49241e-34
AT3G48660		4.77091	1.69909e-37	6.28229e-36		AT5G56850		-2.15229	2.95151e-07	1.23948e-06
AT3G08040	DTX43	4.76883	3.02445e-54	2.15711e-52		AT2G15890	MEE14	-2.1519	1.23743e-34	3.95857e-33
AT5G24316		4.76669	4.36771e-06	1.5508e-05		AT5G26730		-2.15132	0.00872668	0.0170612
AT2G21780		4.76501	4.4041e-34	1.38345e-32		AT5G44530		-2.14984	1.54086e-05	5.03915e-05
AT1G08947		4.75688	2.13584e-18	2.84604e-17		AT1G26800	MPSR1	-2.14899	1.21378e-09	7.00828e-09
AT1G16530	LBD3	4.75655	8.32339e-32	2.3694e-30		AT3G49930		-2.14894	9.91553e-05	0.000281312
AT5G60470		4.75017	2.82314e-17	3.47128e-16		AT3G01480	CYP38	-2.14847	1.44452e-07	6.37492e-07
AT1G12130		4.74503	2.03144e-10	1.30709e-09		AT3G55230	DIR24	-2.1482	3.18658e-11	2.26162e-10
AT3G51690		4.74382	1.20453e-05	4.0111e-05		AT5G35170		-2.14617	5.15278e-19	7.11307e-18
AT2G20150		4.74189	9.29099e-06	3.14487e-05		AT2G01870		-2.14321	1.71998e-10	1.11465e-09
AT4G26460		4.73885	1.75443e-05	5.6849e-05		AT5G52120	PP2A14	-2.14227	1.95603e-07	8.43552e-07
AT3G24610		4.73873	8.13378e-06	2.77222e-05		AT1G23480	CSLA3	-2.14185	3.02292e-07	1.26845e-06
AT1G24470	KCR2	4.7381	1.45983e-52	9.67194e-51		AT3G51760		-2.14122	1.74686e-08	8.72728e-08
AT5G08391		4.73798	1.77511e-25	3.60042e-24		AT1G49975		-2.14082	1.51075e-07	6.64811e-07
AT1G73550		4.73598	1.08447e-48	6.181e-47		AT3G03500		-2.13894	3.10783e-07	1.30157e-06
AT5G19110		4.73094	3.13496e-86	5.97336e-84		AT1G51805		-2.13835	9.7226e-08	4.38643e-07
AT3G23460		4.72934	1.02668e-05	3.44967e-05		AT5G49870	JAL48	-2.13811	2.05902e-05	6.6006e-05
AT5G09210		4.72463	1.60311e-05	5.22704e-05		AT3G49845		-2.1377	2.23008e-05	7.10447e-05
AT5G14340	AtMYB40	4.72211	4.433e-29	1.09895e-27		AT1G20450	ERD10	-2.13727	2.1804e-05	6.95638e-05
AT5G05365		4.71599	5.67374e-41	2.41217e-39		AT1G12240	BFRUCT4	-2.13538	3.0232e-08	1.46442e-07
AT2G42720		4.7147	1.12687e-28	2.71865e-27		AT1G29460		-2.13322	2.61648e-10	1.65577e-09
AT1G03120	ATRAB28	4.7145	4.67806e-45	2.38043e-43		AT1G51880	RHS6	-2.13265	3.34149e-05	0.000103422
AT1G65330	PHE1	4.70651	7.22023e-19	9.85758e-18		AT4G39070	BBX20	-2.13222	1.26458e-05	4.19023e-05
AT1G16490	MYB58	4.70466	2.07549e-28	4.94781e-27		AT5G46580		-2.13174	5.35599e-14	5.04375e-13
AT5G36100		4.70152	4.41235e-11	3.07474e-10		AT1G08550	VDE1	-2.13165	3.69111e-19	5.15256e-18
AT4G12890		4.69903	8.91521e-26	1.84262e-24		AT1G69526		-2.12933	3.5166e-14	3.35885e-13
AT2G43470		4.69441	3.70467e-26	7.85594e-25		AT1G06240		-2.12888	2.52283e-10	1.59922e-09
AT3G52440		4.69407	2.69004e-09	1.4827e-08		AT3G15900		-2.12868	5.04514e-12	3.92866e-11
AT5G22520		4.69191	8.78272e-32	2.49471e-30		AT1G20340	DRT112	-2.12639	3.56306e-11	2.51514e-10
AT3G48700	CXE13	4.6917	1.60933e-32	4.70437e-31		AT3G07650	COL9	-2.12555	2.2672e-29	5.70714e-28
AT1G13480		4.68919	8.33228e-41	3.51951e-39		AT1G66930	LRK10L-2.7	-2.1247	5.64466e-06	1.97042e-05
AT4G00380	FDM2	4.68433	1.91119e-117	7.55905e-115		AT4G34139		-2.12457	0.0124021	0.0234462
AT3G24605		4.68366	4.14716e-10	2.54484e-09		AT3G47650		-2.12376	3.83826e-10	2.36251e-09
AT3G03530	NPC4	4.68245	6.65231e-85	1.1976e-82		AT4G24930		-2.12091	6.78612e-11	4.6264e-10
AT1G76960		4.68052	3.89063e-21	6.21548e-20		AT2G03440	NRP1	-2.12044	4.87878e-07	1.98404e-06
AT1G76290	AEE21	4.677	1.83404e-05	5.92742e-05		AT5G43540		-2.11994	1.91332e-10	1.23474e-09
AT5G26690	HIPP02	4.67457	9.61292e-09	4.97592e-08		AT3G27160	GHS1	-2.11993	7.36247e-11	5.00104e-10
AT3G03230		4.66956	6.15931e-08	2.85836e-07		AT5G27390		-2.11954	1.78162e-07	7.73705e-07
AT5G66816	CEP6	4.66044	1.14079e-05	3.81246e-05		AT5G56540	AGP14	-2.11783	3.06703e-07	1.2851e-06
AT1G32960	SBT3.3	4.66043	1.65862e-18	2.22033e-17		AT2G34940	VSR5	-2.11755	2.48943e-07	1.05648e-06
AT1G57630		4.66011	1.64132e-19	2.35153e-18		AT2G29170		-2.11721	2.1997e-05	7.01369e-05
AT1G29860	WRKY71	4.65941	8.97047e-41	3.78296e-39		AT3G08920	STR10	-2.11711	1.77137e-08	8.83619e-08
AT3G01600	anac044	4.65765	1.69088e-33	5.18061e-32		AT1G48390		-2.11537	0.017999	0.0327487
AT5G64810	WRKY51	4.64909	1.78947e-30	4.74236e-29		AT1G23310	GGAT1	-2.11532	1.09791e-08	5.63724e-08
AT1G50110	BCAT6	4.64636	1.78611e-49	1.05725e-47		AT3G06080	TBL10	-2.11522	5.49703e-13	4.72487e-12
AT2G46880	PAP14	4.64333	6.75144e-13	5.74445e-12		AT5G24490		-2.11468	1.63775e-07	7.15753e-07
AT3G50230		4.64219	1.52504e-59	1.30097e-57		ATCG00600	PETG	-2.11314	4.26122e-05	0.000129343
AT5G41610	CHX18	4.64045	2.9452e-41	1.26867e-39		AT4G20230		-2.11296	0.0170447	0.0311907
AT1G62840		4.6364	1.22978e-12	1.01428e-11		AT3G06390		-2.10997	8.37188e-16	9.14775e-15
AT4G33560		4.62957	2.08812e-46	1.10118e-44		AT2G21370	XK-1	-2.10946	5.263e-20	7.86407e-19
AT4G01170		4.62947	2.17285e-05	6.93567e-05		AT5G25970		-2.10943	0.00331391	0.00707387
AT3G03670	PER28	4.62913	1.66793e-05	5.42076e-05		AT1G05190	RPL6	-2.10908	6.08184e-09	3.22946e-08
AT3G62610	MYB11	4.62482	7.00258e-17	8.40052e-16		AT5G47640	NFYB2	-2.10763	2.70116e-10	1.70564e-09
AT5G36970	NHL25	4.61472	2.30733e-05	7.33267e-05		AT3G44716		-2.10695	0.0128978	0.0242724
AT3G13433		4.61438	6.85427e-10	4.08876e-09		AT3G42800		-2.10477	4.5414e-11	3.16031e-10
AT4G10270		4.61208	2.60021e-29	6.514e-28		AT4G16680		-2.10476	7.20438e-26	1.49494e-24
AT3G62710		4.6113	1.64593e-05	5.35499e-05		AT1G64690	BLT	-2.10431	2.92749e-07	1.2311e-06
AT1G28375		4.61005	2.23996e-05	7.13246e-05		AT3G25770	AOC2	-2.10372	2.81305e-07	1.18534e-06
AT5G25260	FLOT2	4.59889	3.25041e-38	1.24778e-36		AT5G21130		-2.1032	0.00446557	0.00926402
AT1G13470		4.59647	2.06791e-15	2.19167e-14		AT1G79910		-2.10246	1.21892e-06	4.66138e-06
AT5G09876		4.59634	7.29485e-19	9.95425e-18		AT1G75550		-2.10065	0.000269805	0.000707524
AT4G10265		4.58367	1.05814e-48	6.04416e-47		AT3G03630	CS26	-2.10036	1.34594e-15	1.45184e-14
AT1G43810		4.58077	1.82033e-05	5.88529e-05		AT3G48940		-2.09882	2.62275e-06	9.57678e-06
AT2G29460	GSTU4	4.57012	9.60317e-39	3.76398e-37		AT1G18870	ICS2	-2.09705	3.60752e-05	0.000110985
AT5G03065		4.56498	2.05943e-05	6.60111e-05		AT3G53100		-2.09687	6.42606e-09	3.40255e-08
AT3G01285		4.56416	1.89519e-05	6.10993e-05		AT4G16857		-2.09654	2.60105e-12	2.07639e-11
AT5G37160		4.56272	4.56385e-07	1.86469e-06		AT4G27820	BGLU9	-2.09593	1.59279e-06	5.98249e-06
AT1G49700		4.56102	9.55447e-33	2.83743e-31		AT1G32060	PRK	-2.09445	7.78684e-10	4.60507e-09
AT2G15318		4.55912	1.9168e-07	8.28735e-07		AT3G46500		-2.09389	5.98358e-05	0.000176992
AT3G15170	NAC054	4.55889	2.85276e-33	8.64906e-32		AT2G43030	RPL3A	-2.09307	1.56179e-09	8.87249e-09
AT3G02310	2025-09-02	4.55831	2.62851e-13	2.33383e-12		AT5G11060	KNAT4	-2.0916	9.4911e-13	7.92311e-12
AT4G15733	SCRL11	4.55718	2.39541e-05	7.59042e-05		AT2G40711		-2.08754	7.63279e-14	7.09567e-13
AT3G02705		4.55641	7.10131e-11	4.82992e-10		AT1G69200	FLN2	-2.08733	8.26916e-21	1.29644e-19
AT1G66370	MYB113	4.55246	2.67107e-05	8.39661e-05		AT3G50120		-2.08626	1.37701e-05	4.53226e-05
AT3G30200		4.55068	2.44827e-05	7.74101e-05		AT5G22640	TIC100	-2.08585	4.78311e-14	4.52549e-13
AT2G14520	CBSDUF3	4.54267	2.42926e-50	1.48858e-48		AT1G13600	AtbZIP58	-2.08455	0.00999137	0.0192654
AT2G42885		4.54146	1.081e-09	6.27637e-09		AT4G21190	EMB1417	-2.08276	1.23919e-15	1.33945e-14
AT5G03090		4.53932	9.06542e-25	1.766e-23		AT1G68890	PHYLLO	-2.08224	4.87972e-08	2.29514e-07
AT5G55370	AT2	4.538	1.2565e-46	6.69379e-45		AT5G64190		-2.08218	7.21861e-05	0.000210119
AT3G44703		4.53722	2.19363e-05	6.99604e-05		AT4G37560		-2.08216	2.34652e-37	8.61512e-36
AT1G06920	OFP4	4.53496	3.28256e-05	0.000101743		AT3G50140		-2.07906	0.000177936	0.000481979
AT1G66390	MYB90	4.53322	2.98353e-13	2.63471e-12		AT3G08660		-2.07886	0.00143193	0.00328752
AT3G17180	SCPL33	4.53151	2.62125e-05	8.25096e-05		AT4G10300		-2.0772	4.51979e-22	7.64149e-21
AT2G23830	PVA31	4.52368	2.56189e-05	8.07774e-05		AT1G73890		-2.07666	1.66157e-07	7.25433e-07
AT5G17040	UGT78D4	4.52285	7.41125e-22	1.23777e-20		ATCG00670	CLPP1	-2.07627	4.07299e-33	1.2249e-31
AT1G53930		4.5211	2.49311e-05	7.87419e-05		AT1G11260	STP1	-2.07533	1.07246e-10	7.14899e-10
AT1G53708	RTFL9	4.51394	5.79131e-08	2.69572e-07		AT3G14760		-2.07523	7.13715e-06	2.45562e-05
AT3G60920		4.51258	3.23437e-05	0.00010031		AT3G02850	SKOR	-2.07438	0.000537899	0.0013365
AT5G05265		4.50588	2.60911e-05	8.2167e-05		AT3G53960	NPF5.7	-2.07237	5.4626e-07	2.20089e-06
AT1G76430	PHT1-9	4.50181	1.39074e-25	2.83403e-24		AT1G71500		-2.07179	6.61348e-11	4.51696e-10
AT1G09797		4.49942	5.486e-28	1.28092e-26		AT1G14430		-2.07156	3.05294e-05	9.51001e-05
AT5G57240	ORP4C	4.49526	7.18433e-76	9.87051e-74		AT3G13470	CPN60B2	-2.07102	2.82445e-22	4.86342e-21
AT5G62210		4.49334	4.25457e-22	7.21784e-21		AT5G25280		-2.07093	2.1477e-33	6.54947e-32
AT3G59884	MIR827A	4.48681	2.32037e-12	1.86315e-11		AT2G38080	IRX12	-2.06963	3.34402e-16	3.78873e-15
AT2G46400	WRKY46	4.48583	6.26043e-20	9.28009e-19		AT2G35150	EXL7	-2.06899	0.0160839	0.0296298
AT3G12820	AtMYB10	4.48534	9.12845e-42	4.08029e-40		AT1G78750		-2.06734	0.0235862	0.0417505
AT4G33870	PER48	4.48524	3.62405e-09	1.96965e-08		AT4G31140		-2.06635	6.24215e-11	4.2779e-10
AT1G72620		4.48485	3.36301e-34	1.06281e-32		AT5G50950	FUM2	-2.06623	1.60804e-08	8.08169e-08
AT3G54410		4.48459	3.7417e-14	3.56732e-13		AT1G66970	SVL2	-2.06608	3.72579e-06	1.33358e-05
AT1G68470	GT17	4.48446	5.35318e-54	3.76656e-52		AT4G03600		-2.06506	1.45113e-07	6.40196e-07
AT3G21850	ASK9	4.48359	3.33632e-05	0.000103299		AT3G07490	CML3	-2.06476	0.000147082	0.000404194
AT5G37840		4.48206	4.29506e-05	0.000130249		AT5G35220	EGY1	-2.06185	3.92329e-08	1.87159e-07
AT5G64530	NAC104	4.47285	6.01876e-38	2.27701e-36		AT5G43270	SPL2	-2.06002	1.65858e-09	9.37945e-09
AT1G11170		4.4719	3.44941e-74	4.37103e-72		AT3G01140	MYB106	-2.06	0.00215427	0.00477743
AT3G24640		4.4688	3.55678e-05	0.00010954		AT4G02850		-2.05932	0.000687704	0.00167725
AT2G36325		4.46754	2.78215e-07	1.17308e-06		AT3G26280	CYP71B4	-2.05755	5.66528e-05	0.000168416
AT4G29550		4.46573	6.56453e-52	4.2627e-50		AT3G19850		-2.05752	1.14397e-11	8.59347e-11
AT1G19060		4.46524	4.30154e-05	0.00013043		AT2G45243		-2.05706	0.00398895	0.00837239
AT4G16620		4.45873	5.24662e-26	1.09918e-24		AT4G10060		-2.05607	0.000146237	0.000402081
AT4G02170		4.45868	6.45627e-31	1.74286e-29		AT4G03610		-2.0559	0.0120059	0.0227797
AT2G39782		4.4582	3.79489e-05	0.00011627		AT5G65010	ASN2	-2.05559	1.43307e-06	5.43104e-06
AT4G18650	DOGL4	4.45294	7.00519e-05	0.000204431		AT4G01830	ABCB5	-2.05484	0.0149592	0.0277597
AT1G70440	SRO3	4.45111	2.21248e-23	4.01632e-22		AT5G08050		-2.05419	7.9174e-08	3.62018e-07
AT2G25770		4.45025	1.62941e-15	1.74535e-14		AT4G35685		-2.05397	7.06409e-07	2.80543e-06
AT4G13210		4.44551	1.16431e-25	2.38565e-24		AT2G34640	PTAC12	-2.05286	1.30779e-08	6.64952e-08
AT5G57200		4.43846	1.00684e-30	2.69843e-29		AT1G58070		-2.05246	8.25173e-06	2.81095e-05
AT4G27480		4.43239	1.40113e-217	3.04793e-214		AT4G28150		-2.05236	0.000111925	0.000313959
AT5G20440	MOB2A	4.43081	3.87377e-05	0.00011845		AT4G00400	GPAT8	-2.05177	4.42343e-05	0.000133893
AT1G26410	FOX4	4.4265	1.77767e-12	1.44202e-11		AT5G16570	GLN1-4	-2.05061	4.54267e-11	3.16031e-10
AT3G62320		4.4262	1.5044e-09	8.56879e-09		AT2G30930		-2.05059	3.23048e-07	1.35012e-06
AT4G05905		4.42364	5.60923e-05	0.000166864		AT3G63210	MARD1	-2.05021	1.8085e-19	2.58538e-18
AT1G60110		4.42306	7.05436e-59	5.82744e-57		AT3G04450	PHL13	-2.04894	4.39774e-08	2.0846e-07
AT5G46295		4.41524	8.60617e-15	8.65057e-14		AT5G60660	PIP2-4	-2.04888	2.51593e-12	2.0131e-11
AT3G05720	IMPA7	4.41287	2.21774e-25	4.45322e-24		AT3G63490	RPL1	-2.04825	9.63662e-09	4.98522e-08
AT1G62500		4.4104	1.03272e-154	8.16911e-152		AT5G01190	LAC10	-2.04792	5.07172e-05	0.000152056
AT3G28193		4.40888	6.22883e-06	2.16162e-05		AT5G46450		-2.04788	2.2363e-08	1.10331e-07
AT3G27480		4.40762	8.7063e-05	0.000249335		AT3G63110	IPT3	-2.04732	3.84514e-08	1.83599e-07
AT5G60760		4.40126	1.8711e-53	1.28874e-51		AT2G04039		-2.04523	8.13405e-12	6.22963e-11
AT1G09207		4.39959	4.87309e-05	0.000146603		AT5G60020	LAC17	-2.04494	6.88172e-16	7.56699e-15
AT4G11310	RDL4	4.39905	8.39636e-12	6.41248e-11		AT1G31710		-2.04395	0.000594684	0.00146657
AT3G03540	NPC5	4.39693	7.04465e-05	0.000205468		AT2G32300	UCC1	-2.0438	2.73347e-05	8.57729e-05
AT4G21680	NPF7.2	4.39555	3.04003e-80	4.86853e-78		AT3G53720	CHX20	-2.04335	2.56127e-08	1.25346e-07
AT4G02780	GA1	4.3945	1.66369e-41	7.32359e-40		AT1G14030	LSMT-L	-2.04168	7.87551e-10	4.65434e-09
AT2G14900	GASA7	4.3923	1.07328e-46	5.74115e-45		AT4G17245		-2.04032	8.38863e-05	0.000241191
AT4G04490	CRK36	4.39215	6.69074e-28	1.55525e-26		AT4G16880		-2.03965	7.20965e-18	9.26641e-17
AT1G54020		4.38764	1.28879e-41	5.73126e-40		AT3G18050		-2.03931	2.57017e-08	1.25758e-07
AT3G43270	PME32	4.38521	3.68801e-138	2.23888e-135		AT4G14480	BLUS1	-2.03881	4.04545e-05	0.000123281
AT5G17090		4.38491	1.20477e-10	7.97804e-10		AT1G63710	CYP86A7	-2.03875	0.000701997	0.00170878
AT4G32870		4.38443	7.60355e-25	1.48676e-23		AT3G06130	HIPP32	-2.03679	1.85823e-09	1.04384e-08
AT5G55490	GEX1	4.38361	2.02923e-35	6.81737e-34		AT1G60260	BGLU5	-2.0366	1.0075e-08	5.1986e-08
AT3G28380	ABCB17	4.38295	9.99291e-18	1.26875e-16		AT2G29330	TRI	-2.03652	1.13034e-07	5.05591e-07
AT2G25880	AtAUR2	4.37889	1.4771e-24	2.84144e-23		AT2G24680		-2.03585	5.7161e-07	2.29559e-06
AT1G02310	MAN1	4.37673	1.25439e-43	5.99718e-42		AT3G11370		-2.03549	0.000133309	0.000368916
AT1G34047		4.37637	2.81904e-19	3.98205e-18		AT3G24140	FAMA	-2.03535	4.34386e-05	0.000131667
AT5G07805		4.37636	5.40163e-05	0.000161148		AT1G05990	CML7	-2.03522	0.0245081	0.0431832
AT1G43780	SCPL44	4.37615	5.78194e-05	0.000171606		AT4G26370		-2.0319	3.0811e-13	2.71444e-12
AT3G14630	CYP72A9	4.3759	3.13421e-22	5.37906e-21		AT1G74180	AtRLP14	-2.02959	2.4863e-10	1.57913e-09
AT4G29548		4.37577	5.21539e-05	0.000155984		AT3G14530	GGPPS9	-2.02952	4.38157e-05	0.000132749
AT5G20420	CLSY2	4.37562	9.55758e-35	3.07255e-33		AT1G18750	AGL65	-2.02951	2.26086e-15	2.38841e-14
AT4G05380		4.37529	2.99813e-13	2.64492e-12		AT1G06250		-2.02882	6.51359e-08	3.01633e-07
AT1G07937		4.37396	6.29772e-10	3.78408e-09		AT1G17255		-2.02872	0.000710474	0.001727
AT5G49600		4.37159	7.69964e-08	3.52802e-07		AT5G52882		-2.02864	1.71706e-12	1.3959e-11
AT5G64210	AOX2	4.36592	5.94841e-07	2.38485e-06		AT4G14540	NFYB3	-2.02832	1.15898e-05	3.86582e-05
AT1G74010		4.36359	2.09439e-33	6.3944e-32		AT2G31070	TCP10	-2.02832	1.33394e-13	1.21371e-12
AT1G07933		4.35753	1.30237e-06	4.96017e-06		AT1G71740		-2.02794	1.41157e-07	6.23584e-07
AT3G23250	MYB15	4.35736	2.84835e-12	2.2648e-11		AT4G09010	APX4	-2.0262	1.192e-07	5.31622e-07
AT2G33080	AtRLP28	4.3537	6.5941e-05	0.000193473		AT5G11290		-2.02498	0.00166465	0.00377108
AT3G54420	EP3	4.35242	3.70735e-51	2.36618e-49		AT3G13760		-2.02315	1.06758e-10	7.1183e-10
AT1G64110		4.35003	6.51106e-86	1.22277e-83		AT3G54830		-2.02241	5.38388e-08	2.5173e-07
AT4G24000	CSLG2	4.3456	3.86712e-06	1.38171e-05		AT1G59840	CCB4	-2.0216	3.52638e-15	3.64565e-14
AT5G11930	GRXC10	4.34515	7.90453e-35	2.55371e-33		AT1G54500		-2.01911	3.42266e-08	1.64661e-07
AT5G63350		4.3434	4.12931e-30	1.07362e-28		AT1G67830	FXG1	-2.01871	3.30926e-05	0.000102546
AT3G46080	ZAT8	4.34336	4.29997e-25	8.51643e-24		AT2G47360		-2.01681	1.23479e-16	1.45259e-15
AT1G66600	WRKY63	4.34248	3.17668e-16	3.60696e-15		AT2G28671		-2.0155	3.43828e-07	1.43169e-06
AT4G12735		4.34176	1.93774e-26	4.1804e-25		AT3G07070	PBL26	-2.01427	1.58796e-10	1.03294e-09
AT2G42065		4.3416	6.89912e-11	4.69731e-10		AT2G27370	CASP3	-2.01295	1.10588e-05	3.70102e-05
AT5G62848	MIR420	4.33699	7.12924e-05	0.000207703		AT1G53350	RPP8L2	-2.0119	2.22222e-13	1.98457e-12
AT5G44563		4.33565	1.00759e-06	3.90471e-06		AT5G66390	PER72	-2.01187	5.52832e-12	4.29497e-11
AT4G21490	NDB3	4.33383	3.58239e-07	1.48766e-06		AT1G77885		-2.01165	3.41356e-10	2.11909e-09
AT3G05150		4.33077	1.77214e-79	2.78674e-77		AT1G76780		-2.01153	1.0257e-07	4.61635e-07
AT2G07385		4.32666	2.2039e-06	8.12235e-06		AT3G03840		-2.01119	0.000151671	0.000415842
AT1G20735		4.32141	1.836e-08	9.14986e-08		AT2G30950	VAR2	-2.01112	1.79141e-13	1.61474e-12
AT4G38000	DOF4.7	4.31587	8.95158e-05	0.000255855		AT5G45210		-2.00766	0.000238456	0.000632266
AT3G60140	BGLU30	4.31468	2.87768e-35	9.53286e-34		AT1G30750		-2.00755	3.92861e-13	3.42756e-12
AT2G40470	LBD15	4.31362	9.72841e-25	1.89092e-23		AT3G48740	SWEET11	-2.00713	6.71192e-06	2.31848e-05
AT3G25250	OXI1	4.31297	1.90687e-105	5.92583e-103		AT2G33855		-2.00618	7.61543e-20	1.11996e-18
AT2G45420	LBD18	4.30866	5.21679e-22	8.79142e-21		AT1G12040	LRX1	-2.00482	2.68211e-08	1.3086e-07
AT5G11100	SYTD	4.30493	2.75647e-77	3.99749e-75		AT5G43750	PNSB5	-2.00462	6.76433e-10	4.03787e-09
AT4G21380	SD18	4.30045	8.027e-43	3.72841e-41		AT3G50270		-2.00377	0.00143909	0.0033025
AT4G11650	OSM34	4.2984	1.00195e-29	2.55919e-28		AT1G61520	LHCA3	-2.00308	3.14216e-11	2.23313e-10
AT2G30560		4.29627	8.67541e-05	0.000248505		AT2G39920		-2.00168	5.33607e-12	4.14809e-11
AT5G22200		4.29618	1.37727e-19	1.99402e-18		AT4G23400	PIP1-5	-2.00079	9.27337e-07	3.61625e-06
AT2G46790	APRR9	4.29585	4.16866e-07	1.71314e-06		AT3G27850	RPL12C	-2.00009	3.13324e-10	1.95624e-09
AT5G39890	PCO2	4.29531	1.15442e-56	8.86321e-55		AT1G09600		-1.99949	0.000431644	0.00109024
AT5G18320	PUB46	4.29459	1.1885e-16	1.39876e-15		AT1G35180		-1.99686	0.000204626	0.000548696
AT5G65330	AGL78	4.28956	7.73617e-05	0.000224035		AT1G07440		-1.99549	1.08373e-14	1.08183e-13
AT3G14880		4.28883	1.46285e-10	9.55611e-10		AT1G68500		-1.99513	3.845e-11	2.7032e-10
AT4G10240	BBX23	4.28758	0.000108252	0.000304769		AT5G18570	OBGL	-1.99135	2.54528e-09	1.40618e-08
AT1G08165		4.28709	1.91197e-31	5.28709e-30		AT5G19120		-1.99078	8.3799e-14	7.75706e-13
AT5G09750	HEC3	4.28696	2.7752e-05	8.69881e-05		AT3G54580		-1.99032	4.66441e-09	2.50586e-08
AT1G29090		4.28295	2.62565e-07	1.11104e-06		AT2G24980		-1.9903	4.64864e-10	2.83457e-09
AT2G30650		4.27326	9.74623e-05	0.00027687		AT1G68590		-1.99023	2.30244e-07	9.81591e-07
AT1G35880		4.27016	0.000107836	0.000303695		AT4G14380		-1.99018	4.37801e-06	1.55403e-05
AT3G44405		4.26968	3.76568e-10	2.32002e-09		AT1G79529		-1.98907	8.2148e-05	0.000236662
AT1G25530		4.2673	1.65916e-73	2.04296e-71		AT5G12860	DIT1	-1.98854	6.64632e-08	3.07344e-07
AT5G08360		4.267	2.21256e-30	5.81639e-29		AT5G16140	CRS2B	-1.98716	5.67846e-12	4.40638e-11
AT1G57650		4.2661	9.81154e-07	3.81359e-06		AT1G49650	CXE4	-1.98606	1.25521e-07	5.57814e-07
AT1G52470		4.26587	4.15974e-06	1.48079e-05		AT5G63100		-1.98578	1.23926e-10	8.18563e-10
AT5G46350	WRKY8	4.26445	1.19024e-32	3.51075e-31		AT1G68130	IDD14	-1.98558	3.35249e-06	1.20592e-05
AT3G55100	ABCG17	4.26208	0.000112038	0.000314206		AT1G26761		-1.9846	7.68675e-05	0.000222752
AT5G65550	UGT91B1	4.26016	1.86104e-07	8.06035e-07		AT5G07680	NAC079	-1.98447	1.63018e-21	2.66798e-20
AT1G18197		4.25873	1.75749e-32	5.12598e-31		AT2G20180	PIF1	-1.98438	5.49275e-09	2.93276e-08
AT4G06935		4.25551	1.7681e-09	9.97001e-09		AT3G51400		-1.9836	7.11324e-05	0.000207352
AT2G22426		4.25517	4.60612e-06	1.63057e-05		AT3G45390	LECRK12	-1.98271	5.76805e-05	0.000171257
AT1G06217		4.25421	9.38139e-05	0.000267291		AT3G44120		-1.98205	0.00565911	0.0115097
AT5G03545	AT4	4.25127	4.31844e-60	3.75762e-58		AT2G37900	NPF5.6	-1.98125	0.0151529	0.0280812
AT4G13985	FBD1	4.24509	0.000100389	0.000284565		AT3G45780	PHOT1	-1.98082	4.80254e-06	1.69436e-05
AT1G13590	PSK1	4.2446	1.52387e-30	4.05083e-29		AT5G47900		-1.98066	2.10427e-08	1.04113e-07
AT5G09370		4.24349	0.000111128	0.000312024		AT2G23840		-1.98049	3.69694e-19	5.15793e-18
AT3G10200		4.23819	1.91226e-80	3.10047e-78		AT3G09580		-1.98009	2.17368e-10	1.39346e-09
AT4G16810		4.23752	9.9492e-05	0.000282175		AT3G45700	NPF2.4	-1.97889	0.000847048	0.00203005
AT1G75290		4.23749	3.69655e-37	1.33835e-35		AT3G24520	HSFC1	-1.978	8.4153e-09	4.38995e-08
AT3G61035		4.23546	5.03241e-07	2.04048e-06		AT2G39400		-1.97723	1.27258e-05	4.21299e-05
AT3G11740		4.23519	2.11295e-10	1.35653e-09		AT1G15125		-1.97669	5.08556e-05	0.00015238
AT3G46520	ACT12	4.23405	9.93194e-05	0.000281716		AT5G18010	SAUR19	-1.97589	1.06526e-08	5.48042e-08
AT1G03982	RIC8	4.23397	0.000120724	0.000336507		AT2G28960		-1.97356	7.10916e-18	9.15077e-17
AT3G60540		4.23233	1.64573e-28	3.94491e-27		ATCG01280	ycf2-B	-1.97323	3.81265e-11	2.68118e-10
AT5G43860	CLH2	4.23207	3.28698e-27	7.39685e-26		AT3G55800	SBPASE	-1.97258	1.03104e-08	5.31485e-08
AT1G62620		4.22995	4.24468e-22	7.21374e-21		AT5G45320		-1.97179	0.0144572	0.0269276
AT5G01680	CHX26	4.22887	0.000104612	0.000295733		AT4G23570	SGT1A	-1.97133	1.08368e-09	6.28941e-09
AT1G63870		4.22635	5.93028e-11	4.07808e-10		AT5G44582		-1.97093	2.31883e-07	9.88097e-07
AT1G08440	ALMT2	4.21845	2.3091e-09	1.28112e-08		AT5G39080		-1.9709	1.52342e-06	5.74423e-06
AT5G16980		4.21605	1.22398e-45	6.35205e-44		AT4G05130	ENT4	-1.97046	6.72341e-05	0.000196758
AT2G14610	PR1	4.21586	0.000236349	0.000627197		AT1G66190		-1.96982	0.000137069	0.000378469
AT4G29200		4.21492	0.000123761	0.000344272		AT2G35960	NHL12	-1.96917	1.03944e-05	3.48939e-05
AT5G03350	LLP	4.21423	5.66575e-33	1.69803e-31		AT1G08540	SIGB	-1.96795	4.97324e-08	2.33534e-07
AT5G61730	ABCA9	4.21312	3.0197e-12	2.39521e-11		AT4G13280	TPS12	-1.96702	1.41326e-06	5.36063e-06
AT2G41230	ORS1	4.21276	1.1377e-43	5.44925e-42		AT1G09927		-1.96698	8.75061e-07	3.4257e-06
AT1G16770		4.2098	4.4371e-17	5.4099e-16		AT2G43560	FKBP16-3	-1.96622	4.76334e-10	2.90112e-09
AT2G30380		4.20466	1.44556e-08	7.30304e-08		AT5G11450		-1.96594	2.44162e-12	1.95569e-11
AT5G54550		4.20239	2.47681e-06	9.07051e-06		AT2G47890	COL13	-1.96546	2.03859e-25	4.11247e-24
AT5G15800	2025-09-01	4.20199	4.11972e-21	6.57342e-20		AT5G18030	SAUR21	-1.96541	2.05278e-08	1.01662e-07
AT2G07000		4.19702	0.000148093	0.000406801		AT4G24015	RHA4A	-1.96391	1.68648e-07	7.34498e-07
AT3G27410		4.1874	3.38288e-06	1.21568e-05		AT2G37220	CP29B	-1.96319	4.02235e-14	3.8279e-13
AT1G57835		4.18635	0.000123122	0.000342641		AT1G38131	OFUT11	-1.96276	2.34079e-13	2.08617e-12
AT2G37740	ZFP10	4.18561	4.33882e-08	2.05779e-07		AT1G29730		-1.96258	1.28143e-07	5.68982e-07
AT2G16890	UGT90A1	4.18364	5.27286e-51	3.34084e-49		AT2G32560		-1.96209	9.21589e-53	6.18436e-51
AT5G13330	ERF113	4.17991	3.7776e-67	3.86707e-65		AT4G34560		-1.96121	9.8258e-07	3.81742e-06
AT5G42830		4.17756	1.09238e-24	2.1154e-23		AT1G11655		-1.96042	2.99337e-05	9.33894e-05
AT3G47950	AHA4	4.17698	1.16988e-36	4.1324e-35		AT2G28260	CNGC15	-1.9604	1.07871e-07	4.83743e-07
AT5G57510		4.17542	1.35885e-17	1.71111e-16		AT2G22122		-1.95799	4.41781e-08	2.09261e-07
AT1G04150		4.17349	7.14578e-24	1.33048e-22		AT1G70880		-1.95779	3.49138e-11	2.46989e-10
AT5G24900	CYP714A2	4.17282	3.34061e-26	7.10124e-25		AT2G08120		-1.95631	0.0151426	0.0280641
AT5G22540		4.16937	2.8385e-14	2.73216e-13		AT4G03280	PETC	-1.95626	5.95845e-10	3.58799e-09
AT3G52780	PAP20	4.1683	1.22826e-25	2.51076e-24		AT5G10470	KCA1	-1.95595	5.83746e-10	3.5257e-09
AT3G49540		4.1661	0.000167046	0.000454733		AT2G43900		-1.95575	2.17737e-11	1.57664e-10
AT2G30984		4.16194	9.81676e-09	5.07238e-08		AT2G08220		-1.95518	3.1516e-05	9.78932e-05
AT4G24260	KOR3	4.15847	1.17323e-82	1.97587e-80		AT1G01030	NGA3	-1.95491	1.22796e-11	9.16978e-11
AT3G19070		4.15833	0.000171345	0.000465335		AT1G77060		-1.95461	9.46872e-06	3.19839e-05
AT1G70400		4.15369	0.000157235	0.000430018		AT1G14642		-1.9526	0.0022835	0.00503662
AT1G08080	ACA7	4.15243	5.67902e-09	3.02603e-08		AT2G28630	KCS12	-1.95252	6.84889e-05	0.000200138
AT4G24030		4.15134	1.12784e-05	3.77063e-05		ATCG01050	NDHD	-1.95131	4.81791e-21	7.65469e-20
AT1G55700		4.15028	8.44213e-14	7.81189e-13		AT2G30570	PSBW	-1.95127	5.17812e-11	3.58255e-10
AT5G28810		4.14982	3.76269e-10	2.31873e-09		AT4G09040		-1.9506	2.96726e-10	1.85838e-09
AT2G37810		4.14664	2.21782e-05	7.06974e-05		AT5G26080		-1.95025	6.77165e-05	0.000198036
AT4G02360		4.1448	9.53858e-24	1.76342e-22		AT4G35770	STR15	-1.94885	1.32614e-05	4.37698e-05
AT3G20880	WIP4	4.14181	2.0297e-09	1.13552e-08		ATCG00860	ycf2-B	-1.94771	2.12185e-10	1.3619e-09
AT2G42090	ACT9	4.14178	0.000159731	0.000436108		AT2G40020		-1.94722	5.78426e-08	2.69292e-07
AT3G25882	NIMIN-2	4.13884	1.89254e-41	8.30298e-40		AT1G21130	IGMT4	-1.94663	3.2994e-06	1.18796e-05
AT3G14030		4.1382	0.000162237	0.000442441		AT2G34010	SPEAR2	-1.94584	0.00129402	0.00299965
AT3G62210	EDA32	4.13683	9.65932e-37	3.43057e-35		AT5G23120	HCF136	-1.94571	1.50477e-09	8.56904e-09
AT1G52680		4.13649	0.000171408	0.000465456		AT3G16220		-1.94558	9.43566e-10	5.52137e-09
AT5G22530		4.13434	5.77735e-06	2.0127e-05		AT3G56650	PPD6	-1.9438	6.53779e-08	3.027e-07
AT3G03270		4.13425	8.5837e-51	5.38627e-49		AT1G55670	PSAG	-1.94374	1.1266e-08	5.7766e-08
AT1G06330		4.13346	5.58708e-10	3.38074e-09		AT2G18050	HIS1-3	-1.94371	4.13546e-30	1.07415e-28
AT5G39120		4.13339	0.000179704	0.000486516		AT1G18810	PKS3	-1.94253	0.000149096	0.000409426
AT1G16850		4.13323	1.67317e-32	4.8855e-31		AT2G20850	SRF1	-1.94245	1.3662e-09	7.83808e-09
AT4G18150		4.12616	0.000172894	0.000469296		AT1G23760	PGL1	-1.94242	0.000554625	0.00137479
AT3G21560	UGT84A2	4.12535	3.64751e-43	1.71558e-41		AT3G59370		-1.94213	0.000466323	0.00116946
AT1G28360	ERF12	4.1235	5.49605e-37	1.96802e-35		AT1G67090	RBCS-1A	-1.94206	1.17355e-07	5.23933e-07
AT2G36695		4.12277	1.78581e-06	6.67192e-06		AT3G21260	GLTP3	-1.94169	6.79622e-07	2.70522e-06
AT5G02945		4.1226	0.000200944	0.000539599		AT3G25710	BHLH32	-1.94053	4.53755e-16	5.08799e-15
AT2G43570	CHI	4.12139	5.16901e-35	1.68244e-33		AT4G13260	YUC2	-1.93953	0.000982844	0.00232984
AT5G62730	NPF4.7	4.11634	1.74665e-31	4.85048e-30		AT3G19620	BXL5	-1.93914	4.71842e-05	0.000142278
AT3G05085		4.11355	1.95206e-05	6.2762e-05		AT5G59080		-1.93911	3.75047e-15	3.86354e-14
AT4G32810	CCD8	4.10814	8.08545e-81	1.31914e-78		AT4G06534		-1.93799	6.55133e-06	2.26541e-05
AT4G08385		4.10527	0.00022704	0.00060406		AT1G19660	BBD2	-1.93779	8.49102e-18	1.08545e-16
AT5G59120	SBT4.13	4.10389	0.000219799	0.00058607		AT3G63370	PCMP-H83	-1.93776	2.19505e-12	1.76796e-11
AT4G06855		4.10355	0.000182823	0.000494193		AT1G74810	BOR5	-1.9372	3.10585e-06	1.12215e-05
AT1G67105		4.10297	1.22343e-36	4.31573e-35		AT4G25940		-1.93713	8.7159e-08	3.95824e-07
AT2G15020		4.10171	6.60723e-18	8.5215e-17		AT1G72180	CEPR2	-1.93564	4.84983e-07	1.97288e-06
AT1G66465		4.10153	1.11787e-20	1.74318e-19		AT1G72150	PATL1	-1.93553	4.11727e-07	1.69335e-06
AT1G64540		4.10035	2.52759e-12	2.0209e-11		AT4G16950	RPP5	-1.93491	4.45944e-08	2.11001e-07
AT1G18180		4.09563	1.02014e-59	8.7598e-58		AT1G33440	NPF4.4	-1.93342	1.96646e-06	7.30087e-06
AT1G06407		4.09216	1.27755e-05	4.22838e-05		AT3G62740	BGLU7	-1.93289	1.6607e-11	1.21944e-10
AT1G01680	PUB54	4.08633	0.000235184	0.000624478		AT4G32260		-1.93196	3.21377e-11	2.2803e-10
AT1G51000		4.08628	0.000126207	0.000350442		AT5G02940		-1.93039	2.94803e-08	1.43093e-07
AT1G48510		4.08103	7.9629e-21	1.24993e-19		AT4G26010		-1.92886	2.47052e-16	2.84099e-15
AT4G36430	PER49	4.0784	2.24606e-100	5.98278e-98		AT2G28810	DOF2.2	-1.92831	2.35328e-10	1.49902e-09
AT1G26590		4.07401	7.50208e-23	1.32859e-21		AT3G56410		-1.92823	0.000328896	0.000848035
AT2G45360		4.0705	8.40668e-06	2.86187e-05		AT3G03710	PNP1	-1.92802	6.86288e-10	4.09295e-09
AT1G05383		4.07032	1.2035e-12	9.94182e-12		AT1G29450	SAUR64	-1.92789	0.000139412	0.000384533
AT2G33020	AtRLP24	4.06985	3.66671e-33	1.10526e-31		AT2G44110	MLO15	-1.92753	5.35865e-11	3.70255e-10
AT4G01930		4.0698	2.55354e-20	3.90039e-19		AT4G01060	ETC3	-1.92744	0.00110305	0.00259102
AT2G06905		4.06761	1.19417e-08	6.09794e-08		AT3G24420		-1.92741	8.96166e-13	7.51478e-12
AT5G53048		4.06694	6.20297e-51	3.92064e-49		AT2G21045	HAC1	-1.9271	3.76942e-18	4.95204e-17
AT3G14362	DVL19	4.06144	6.70348e-14	6.25179e-13		ATCG00990	TRNN.1	-1.92684	0.0257519	0.0451372
AT1G10385	EXO84A	4.0604	1.08223e-10	7.21044e-10		AT4G19920		-1.92666	0.000608466	0.00149829
AT3G30842	ABCG38	4.05861	1.60302e-15	1.71848e-14		AT1G53800		-1.92635	9.66223e-14	8.89361e-13
AT4G25850	ORP4B	4.05549	2.02884e-26	4.37332e-25		AT4G11410		-1.92617	3.68982e-21	5.90191e-20
AT3G13784	CWINV5	4.05488	3.22493e-07	1.34801e-06		AT3G17640		-1.92594	2.37028e-08	1.16545e-07
AT1G30920		4.05478	2.82928e-08	1.37611e-07		AT1G09440		-1.92545	0.000118258	0.00033016
AT5G07990	CYP75B1	4.04863	7.26522e-35	2.35592e-33		AT2G36000		-1.92536	5.37875e-16	5.98494e-15
AT1G23070		4.04856	0.000281916	0.000736282		AT5G41050		-1.9248	9.16897e-05	0.000261553
AT5G40620		4.04615	0.000290999	0.000758336		AT4G08160	XYN3	-1.92408	0.000917897	0.0021864
AT2G43000	JUB1	4.0436	2.5733e-50	1.56947e-48		AT4G14400	ACD6	-1.92325	1.85918e-05	5.99977e-05
AT2G39510		4.03696	2.23432e-27	5.08054e-26		AT4G04640	ATPC1	-1.92299	2.7758e-09	1.52804e-08
AT1G44941		4.03347	0.000281014	0.000734146		AT1G66910	LRK10L-2.5	-1.92283	1.00664e-06	3.9022e-06
AT5G20790		4.03045	5.09703e-97	1.23197e-94		AT2G26500		-1.92245	1.32332e-10	8.69688e-10
AT5G12020	HSP17.6	4.0282	1.65818e-26	3.6011e-25		AT1G54790		-1.9213	0.0117021	0.0222549
AT4G01985		4.02711	6.92638e-10	4.12705e-09		AT5G14210		-1.92127	2.82656e-10	1.77794e-09
AT3G06325		4.02709	1.5585e-12	1.27334e-11		AT1G51110	PAP12	-1.92118	1.64043e-12	1.33609e-11
AT2G21770	CESA9	4.02479	2.49859e-111	8.93467e-109		AT5G67430		-1.92095	1.99163e-07	8.57912e-07
AT2G45570	CYP76C2	4.02457	7.80352e-28	1.80428e-26		AT5G47770	FPS1	-1.92047	5.00792e-07	2.03118e-06
AT2G07637		4.01971	0.000263625	0.000692112		AT4G20130	PTAC14	-1.92006	5.4038e-11	3.72979e-10
AT1G67220	HAC2	4.01618	2.50094e-05	7.89509e-05		AT4G27600	NARA5	-1.91951	1.69411e-13	1.52915e-12
AT4G24110		4.0161	1.61358e-55	1.19661e-53		AT2G28270		-1.91791	0.0284967	0.0494173
AT3G28500	RPP2C	4.01462	4.29493e-19	5.96038e-18		AT4G24770	CP31A	-1.91745	6.33501e-10	3.80247e-09
AT4G09960	STK	4.0144	0.00028666	0.000747625		AT1G23720		-1.91631	9.45781e-06	3.19595e-05
AT2G29090	CYP707A2	4.01387	1.64126e-28	3.93783e-27		AT1G52245		-1.91528	4.96055e-10	3.0142e-09
AT1G14755		4.01298	0.00027793	0.000726671		AT1G09610	GXM1	-1.91516	0.011057	0.021119
AT3G13010		4.01246	5.08218e-08	2.38392e-07		AT5G53160	PYL8	-1.91434	5.31743e-14	5.00925e-13
AT4G22470		4.01209	7.77515e-40	3.19123e-38		AT1G12900	GAPA-2	-1.91265	1.4819e-08	7.47076e-08
AT5G38900		4.00682	3.72441e-48	2.08184e-46		AT5G23280	TCP7	-1.91255	2.52395e-09	1.39499e-08
AT2G15490	UGT73B4	4.00563	1.92971e-30	5.09849e-29		AT4G13495		-1.91253	4.75539e-12	3.71105e-11
AT3G57970		4.00397	3.44058e-05	0.000106162		AT1G29070	RPL34	-1.91235	6.09339e-10	3.66586e-09
AT1G72260	THI2.1	4.0021	0.000320848	0.000829495		AT2G27402		-1.91091	1.26646e-10	8.35051e-10
AT1G21528		3.99921	2.17013e-05	6.92785e-05		AT1G17220	FUG1	-1.91009	4.09047e-15	4.20219e-14
AT2G37670		3.99746	2.02767e-53	1.39291e-51		AT3G57520	RFS2	-1.90882	1.86433e-11	1.36283e-10
AT2G21910	CYP96A5	3.98759	0.000302303	0.00078583		AT3G59040		-1.90867	1.58817e-09	9.01641e-09
AT1G55775		3.98747	4.93203e-09	2.64582e-08		AT3G25950		-1.90822	0.000383739	0.000978617
AT1G20500	4CLL4	3.98578	0.000310042	0.000803999		AT5G11070		-1.90739	0.0141355	0.0263888
AT1G75470	PUP15	3.9851	0.00036783	0.000941264		AT5G53450	PAP14	-1.90686	9.16811e-17	1.08883e-15
AT3G22550	FLZ8	3.9825	1.34501e-76	1.89785e-74		AT1G34000	OHP2	-1.90664	1.12025e-09	6.49266e-09
AT2G05065		3.9816	0.000333485	0.000859188		AT4G22490		-1.90616	0.0256841	0.0450455
AT4G35590	RKD5	3.97867	4.25641e-22	7.21784e-21		AT2G48070	RPH1	-1.90553	6.42907e-07	2.56651e-06
AT4G11480	CRK32	3.97535	0.000329503	0.000849515		AT3G18800		-1.90471	1.25171e-11	9.33029e-11
AT3G51860	CAX3	3.97083	7.2218e-56	5.40166e-54		AT3G17510	CIPK1	-1.90385	1.62135e-10	1.05387e-09
AT5G22300	NIT4	3.96893	1.70881e-47	9.41073e-46		AT5G23920		-1.90315	7.05928e-06	2.43204e-05
AT1G02250	NAC005	3.96488	0.000397728	0.00101143		AT3G60370		-1.90276	2.39635e-14	2.31682e-13
AT2G25120		3.96351	0.000335624	0.000864359		AT4G14870	SECE1	-1.90268	1.01052e-08	5.21319e-08
AT5G65510	AIL7	3.95945	5.58481e-66	5.56434e-64		AT2G01950	BRL2	-1.90246	1.16192e-05	3.874e-05
AT4G23320	CRK24	3.95943	1.27137e-08	6.47246e-08		AT1G18980		-1.90213	8.4284e-29	2.05814e-27
AT1G02940	ATGSTF5	3.95724	1.89796e-22	3.29636e-21		AT3G02060		-1.9018	7.86296e-12	6.03513e-11
AT3G13432		3.95414	5.45141e-26	1.13843e-24		AT3G24300	AMT1-3	-1.90177	7.48209e-17	8.9634e-16
AT3G25180	CYP82G1	3.95387	6.93771e-08	3.20138e-07		AT4G02090		-1.90172	2.17937e-05	6.95396e-05
AT2G20142		3.95286	7.73908e-28	1.79097e-26		AT1G52230	PSAH2	-1.90137	1.32867e-09	7.63114e-09
AT1G20790		3.95084	0.000381248	0.000973215		AT1G78120	TPR12	-1.90112	4.2392e-18	5.53854e-17
AT5G09910	LIP2	3.9507	1.67611e-05	5.44522e-05		AT3G62160		-1.9003	3.45863e-05	0.000106656
AT1G13610		3.94935	1.05638e-05	3.54308e-05		AT3G54870	KINUC	-1.89855	7.20241e-09	3.79056e-08
AT1G57750	CYP96A15	3.948	0.000472159	0.00118307		AT4G20362		-1.89814	1.23433e-05	4.10143e-05
AT3G13660	DIR22	3.94527	1.68458e-07	7.33885e-07		AT3G24560	RSY3	-1.89775	2.27847e-19	3.23598e-18
AT1G02390	GPAT2	3.9442	6.04143e-86	1.14279e-83		AT4G19100	PAM68	-1.89753	1.51902e-05	4.97209e-05
AT4G02160		3.93545	0.000235119	0.000624368		AT5G26622		-1.89728	4.49283e-11	3.12832e-10
AT5G54700		3.93522	0.000428853	0.0010834		AT4G01037	WTF1	-1.89681	1.00993e-11	7.64374e-11
AT1G01480	ACS2	3.93343	2.40318e-22	4.14623e-21		AT5G62720		-1.89484	8.84582e-10	5.19953e-09
AT5G35950	JAL42	3.93325	2.30925e-05	7.33699e-05		AT1G05260	PER3	-1.89392	3.23299e-10	2.01226e-09
AT2G30340	LBD13	3.93272	4.50554e-25	8.90329e-24		AT2G03500	EFM	-1.89256	1.11619e-10	7.43104e-10
AT5G53700		3.93187	1.84113e-17	2.29517e-16		AT5G04375		-1.89205	0.02495	0.0438848
AT5G28646	WVD2	3.93044	5.80569e-13	4.98034e-12		AT1G22330		-1.89178	1.40242e-05	4.61009e-05
AT5G14490	anac085	3.92926	7.73357e-15	7.80051e-14		AT4G07400	FBL8	-1.89156	4.48979e-11	3.12704e-10
AT5G03535		3.92275	0.000419307	0.00106216		AT5G44130	FLA13	-1.89131	0.000246421	0.000651665
AT5G42530		3.91803	1.49784e-50	9.24339e-49		AT1G65590	HEXO3	-1.8901	1.34284e-06	5.10984e-06
AT4G02300	PME39	3.9179	0.000472471	0.00118374		AT2G03770	SOT13	-1.89007	0.00692662	0.0138299
AT4G39830		3.91635	1.20775e-111	4.37876e-109		AT1G43670	CYFBP	-1.88953	8.88809e-37	3.16528e-35
AT3G05630	PLPZETA2	3.91338	1.10476e-97	2.77295e-95		AT4G12740	MYH	-1.88913	0.00046096	0.00115768
AT3G02775		3.91244	0.000106369	0.00029992		AT1G21500		-1.88744	2.77167e-06	1.00782e-05
AT1G09960	SUC4	3.90961	1.55213e-103	4.45239e-101		AT1G13270	MAP1B	-1.88636	5.01697e-14	4.73645e-13
AT1G06080	ADS1	3.90574	2.58392e-30	6.77215e-29		AT1G19720	DYW7	-1.886	1.50467e-07	6.6236e-07
AT3G08790	TOL8	3.89993	1.32484e-05	4.3738e-05		AT1G52290	PERK15	-1.88527	0.000110658	0.000310839
AT3G43190	SUS4	3.89828	4.07357e-66	4.07419e-64		AT3G52060		-1.88485	1.05057e-13	9.6496e-13
AT5G56970	CKX3	3.89705	4.65536e-17	5.66808e-16		AT2G23400		-1.88461	0.00101204	0.00239469
AT5G04010	NSFBX	3.89317	1.83856e-05	5.94057e-05		AT3G16030	CES101	-1.88409	3.86419e-13	3.37474e-12
AT1G23730	BCA3	3.89226	2.15174e-93	4.68075e-91		AT4G39780	ERF060	-1.88286	2.02099e-08	1.00163e-07
AT4G05715		3.8906	0.000457673	0.0011502		AT5G40060		-1.88256	2.11675e-06	7.81883e-06
AT3G50330	HEC2	3.88786	2.89546e-13	2.56301e-12		AT5G18850		-1.88254	4.00409e-17	4.8911e-16
AT4G35725		3.88647	0.000479163	0.00119982		AT1G18170	FKBP17-2	-1.88167	2.14569e-11	1.55457e-10
AT3G04050		3.88414	1.89925e-31	5.25748e-30		AT4G19170	CCD4	-1.88152	4.41421e-05	0.000133658
AT1G27565		3.8839	0.000507104	0.00126565		AT3G52150	PSRP2	-1.88117	6.98924e-10	4.15976e-09
AT5G62160	ZIP12	3.88167	2.73616e-27	6.18932e-26		AT3G26520	TIP1-2	-1.88116	9.0308e-05	0.000258006
AT2G02700		3.88109	1.03227e-07	4.64352e-07		AT4G07820		-1.88049	2.4867e-16	2.85834e-15
AT1G13340		3.88085	4.04213e-53	2.74781e-51		AT2G24120	RPOT3	-1.87845	6.32517e-16	6.9874e-15
AT1G06703		3.87988	0.000532706	0.00132423		AT3G45710	NPF2.5	-1.87679	6.4261e-16	7.0929e-15
AT3G20590		3.87767	1.38675e-20	2.1509e-19		AT2G04842	EMB2761	-1.87672	1.50517e-15	1.61492e-14
AT1G19410		3.87695	8.29697e-09	4.33255e-08		AT3G56980	ORG3	-1.87671	0.000205288	0.000550189
AT1G65481		3.8745	6.0171e-24	1.12434e-22		AT3G18780	ACT2	-1.87661	2.99421e-07	1.25681e-06
AT3G56700	FAR6	3.87292	0.000522473	0.00130028		AT3G19480	PGDH3	-1.87605	1.1671e-06	4.4803e-06
AT4G27250		3.8697	0.000215397	0.000575333		AT5G19750		-1.87603	1.72788e-10	1.1195e-09
AT1G15840		3.86568	2.38235e-13	2.12176e-12		AT1G43765		-1.87477	0.0015897	0.00361541
AT3G55970	JRG21	3.86557	1.69809e-68	1.80191e-66		AT1G77020		-1.87466	1.78648e-05	5.78088e-05
AT3G46230	HSP17.4A	3.86472	2.25987e-37	8.30868e-36		AT3G14420	GLO1	-1.87361	8.85432e-10	5.20336e-09
AT3G51240	F3H	3.8622	2.39462e-36	8.37923e-35		AT3G03145		-1.87271	0.021789	0.0388484
AT1G15520	ABCG40	3.85685	7.72641e-45	3.88613e-43		AT1G67700	HHL1	-1.87202	1.82237e-08	9.0854e-08
AT2G14560	LURP1	3.85061	0.000602961	0.00148572		AT2G24060	IF3-2	-1.87174	6.68638e-21	1.05463e-19
AT3G57310		3.8473	0.000256302	0.000675195		AT2G14880		-1.87157	4.86609e-17	5.91087e-16
AT1G79580	SMB	3.84636	1.89076e-13	1.69727e-12		AT2G15960		-1.87149	5.37331e-27	1.19287e-25
AT1G35515	MYB8	3.84026	2.39723e-19	3.39173e-18		AT3G18217	MIR157C	-1.8703	0.00799974	0.0157723
AT4G15910	ATDI21	3.83906	2.52762e-26	5.41716e-25		AT5G48390	ZIP4	-1.8698	0.027933	0.0485267
AT2G47550	PME20	3.8356	9.84142e-44	4.74862e-42		AT3G18680		-1.86801	1.77998e-10	1.15125e-09
AT3G61118		3.83517	1.77696e-17	2.21729e-16		AT2G32500		-1.86657	3.43624e-17	4.20928e-16
AT1G53625		3.83385	8.18268e-45	4.09197e-43		AT2G20030	ATL12	-1.86629	0.000195539	0.000526059
AT2G19190	SIRK	3.83332	2.19706e-22	3.80066e-21		AT5G24410	PGL4	-1.86527	0.00551828	0.0112459
AT1G09180	ATSAR1	3.83251	1.06549e-06	4.11503e-06		AT3G20640	BHLH123	-1.86508	1.15792e-06	4.44701e-06
AT2G46950	CYP709B2	3.83081	8.3403e-15	8.39627e-14		AT3G49070		-1.86489	0.00383878	0.00808777
AT3G62100	IAA30	3.83072	4.02566e-16	4.53739e-15		AT5G63660	PDF2.5	-1.86473	0.00362725	0.00768616
AT3G24340	CLSY4	3.82998	5.60378e-52	3.64791e-50		AT2G33800	RPS5	-1.86465	1.4078e-10	9.21957e-10
AT1G30550		3.82749	7.95678e-26	1.64844e-24		AT5G06290	2-Cys Prx B	-1.86459	1.85134e-11	1.35371e-10
AT5G10000	FD4	3.82449	0.000632882	0.00155343		AT2G16750		-1.86457	1.64028e-10	1.06512e-09
AT5G01870	LTP10	3.82322	1.47074e-24	2.83128e-23		AT3G45680	NPF2.3	-1.86402	0.00778962	0.0153894
AT1G80740	CMT1	3.82296	2.34104e-05	7.43255e-05		AT5G38060		-1.86369	1.79786e-09	1.01145e-08
AT5G25190	ERF003	3.81784	5.77926e-37	2.0666e-35		AT1G33811		-1.86333	5.5056e-05	0.000163968
AT1G63440	HMA5	3.81634	4.09732e-54	2.89855e-52		AT5G24750		-1.86327	1.18981e-22	2.08448e-21
AT1G32713	MIR829A	3.81612	0.000623818	0.0015332		AT5G24880		-1.8632	4.42702e-08	2.09657e-07
AT5G03810		3.81461	0.000687095	0.00167594		AT4G13830	ATJ20	-1.86318	2.42552e-08	1.18948e-07
AT2G35580		3.81254	0.000723084	0.00175601		AT3G08010	ATAB2	-1.86116	2.06991e-09	1.15579e-08
AT3G49380	iqd15	3.80758	1.04809e-34	3.36522e-33		AT2G18710	SCY1	-1.8611	3.11444e-14	2.98675e-13
AT1G67623		3.80513	0.000259419	0.00068265		AT5G05320	MO3	-1.86109	4.66697e-30	1.2098e-28
AT2G09925		3.80505	5.41492e-05	0.000161507		AT3G04550	RAF1.2	-1.86064	4.73515e-09	2.54334e-08
AT3G02925		3.80464	0.000160357	0.000437542		AT1G35680	RPL21	-1.86009	2.24537e-10	1.43624e-09
AT5G44700	GSO2	3.80347	7.03726e-11	4.78761e-10		AT5G21930	PAA2	-1.85889	8.62242e-11	5.81151e-10
AT3G14950	TTL2	3.80179	1.96009e-29	4.94359e-28		AT1G28260	SMG7L	-1.8587	4.4815e-10	2.73778e-09
AT4G11020		3.80039	5.99272e-05	0.000177222		AT3G52840	BGAL2	-1.85761	2.53638e-06	9.27045e-06
AT5G57320	VLN5	3.79749	3.76363e-37	1.36074e-35		AT5G19790	RAP2-11	-1.85745	2.26559e-10	1.44776e-09
AT1G05397		3.7957	4.76367e-11	3.30544e-10		AT1G10760	GWD1	-1.85724	2.89553e-20	4.41242e-19
AT3G57645	U2.2	3.79516	5.52804e-09	2.9504e-08		AT5G57630	CIPK21	-1.85482	3.42197e-15	3.54473e-14
AT5G15940		3.79398	7.31105e-10	4.34535e-09		AT1G74730		-1.85479	3.73239e-09	2.02495e-08
AT1G55030		3.79136	0.000694121	0.00169134		AT1G29510	SAUR67	-1.85434	0.000326698	0.000843282
AT4G15280	UGT71B5	3.79102	3.82222e-14	3.64144e-13		AT1G07320	RPL4	-1.85382	6.71693e-08	3.10392e-07
AT2G38060	PHT4	3.78544	7.85689e-45	3.93821e-43		AT1G51840		-1.85362	3.6472e-08	1.74627e-07
AT4G14723	EPFL4	3.78258	3.13776e-19	4.40603e-18		AT1G07610	MT1C	-1.85342	5.28696e-35	1.71869e-33
AT5G59340	WOX2	3.78	5.29665e-39	2.10768e-37		AT3G63240	IP5P4	-1.85312	1.3583e-11	1.00787e-10
AT5G57420	IAA33	3.78	5.99589e-05	0.000177296		AT5G00925		-1.85118	0.00287151	0.00621697
AT2G33880	WOX9	3.77824	5.2497e-09	2.80931e-08		AT2G21560		-1.84981	8.74795e-10	5.1478e-09
AT2G44070		3.77793	4.98745e-05	0.000149765		AT4G17860		-1.8485	0.0253208	0.0444712
AT1G47510	IP5P11	3.77643	1.5517e-17	1.94364e-16		AT1G29500	SAUR66	-1.84835	1.01599e-05	3.41727e-05
AT5G53902	U3B	3.77602	2.8044e-12	2.23258e-11		AT3G51300	ARAC11	-1.84829	0.000116638	0.000326126
AT3G11325		3.7735	3.45096e-05	0.000106444		AT5G59250		-1.84793	1.57955e-10	1.02773e-09
AT3G57157		3.77232	4.84422e-28	1.13411e-26		AT3G06980	RH50	-1.84758	4.09513e-07	1.68478e-06
AT1G22170		3.772	1.73452e-41	7.62254e-40		AT4G17600	LIL3.1	-1.84737	1.04531e-08	5.3852e-08
AT5G02230		3.76789	2.35712e-79	3.68445e-77		AT1G73920		-1.84717	6.94018e-11	4.72403e-10
AT1G12980	ESR1	3.76696	1.11018e-13	1.01685e-12		AT1G75690	LQY1	-1.84689	2.27219e-08	1.11937e-07
AT5G52730	HIPP11	3.7649	0.00084475	0.0020251		AT1G65800	SD16	-1.84569	1.13661e-10	7.55925e-10
AT4G17990		3.75476	0.000892787	0.00213126		AT1G80920	ATJ8	-1.84507	2.82449e-10	1.77706e-09
AT1G63005	MIR399B	3.75233	1.48261e-05	4.85901e-05		AT1G42970	GAPB	-1.84436	8.51454e-11	5.74176e-10
AT3G21090	ABCG15	3.75217	1.51617e-126	7.61116e-124		AT5G40390	RFS5	-1.84403	1.33102e-05	4.39197e-05
AT5G07560	GRP20	3.73656	4.12888e-36	1.42755e-34		AT5G43470	RPP8	-1.84321	4.88574e-08	2.29756e-07
AT5G13600		3.73248	7.85518e-06	2.68427e-05		AT1G55010	PDF1.5	-1.8431	3.43812e-05	0.000106098
AT1G31140	AGL63	3.7311	4.07877e-05	0.000124166		AT2G18700	TPS11	-1.84296	6.11136e-18	7.89757e-17
AT3G47400	PME33	3.7301	9.6431e-23	1.69625e-21		AT1G59720	PCMP-H51	-1.84189	7.0952e-13	6.02515e-12
AT1G08173		3.7286	2.60751e-07	1.10408e-06		AT2G33205		-1.84098	0.000248194	0.000655888
AT5G43090	APUM13	3.72773	0.000996155	0.00235968		AT2G08610		-1.84084	0.00068776	0.00167725
AT1G15385		3.71578	1.51013e-06	5.69908e-06		AT5G45070	PP2A8	-1.84079	1.23192e-07	5.4793e-07
AT3G13090	ABCC6	3.71489	1.1929e-22	2.08849e-21		AT5G66080		-1.84056	2.26803e-19	3.22291e-18
AT4G10260		3.71454	0.000222944	0.000593728		AT1G76890	GT-2	-1.84038	4.87083e-09	2.61406e-08
AT2G39350	ABCG1	3.71318	1.21829e-98	3.08759e-96		AT5G51970	SDH	-1.83956	4.81583e-08	2.26672e-07
AT1G09537		3.71261	2.238e-17	2.7727e-16		AT3G45160		-1.83942	0.000125321	0.000348168
AT1G04920	SPS3	3.71016	1.5606e-48	8.83684e-47		AT1G69523		-1.8384	1.58777e-11	1.16844e-10
AT1G54530		3.70885	1.0518e-17	1.33218e-16		ATCG00610	TRNW	-1.83678	0.00919784	0.0178781
AT5G51480	SKS2	3.70786	2.64207e-25	5.28091e-24		AT3G61080		-1.83659	1.35021e-18	1.81679e-17
AT1G23510		3.70777	0.00106588	0.00251231		AT3G09210	PTAC13	-1.83574	1.39821e-13	1.26997e-12
AT3G26819	MIR169N	3.70565	0.00104298	0.00246367		AT4G12980		-1.83548	1.46212e-15	1.57002e-14
AT4G26050	PIRL8	3.70334	7.97417e-06	2.72113e-05		AT2G24090	RPL35	-1.83542	1.77165e-09	9.98602e-09
AT5G52600	MYB82	3.70262	1.87808e-24	3.59161e-23		AT1G02335	GL22	-1.83443	2.38414e-05	7.55838e-05
AT1G17830		3.70242	7.02978e-59	5.82557e-57		AT5G59780	MYB59	-1.83378	7.06888e-19	9.66104e-18
AT5G64000	SAL2	3.70212	1.16735e-71	1.35433e-69		AT4G01440		-1.83357	0.000107057	0.00030173
AT4G25810	XTH23	3.70165	2.31135e-23	4.19287e-22		AT5G67370	CGLD27	-1.83317	8.37857e-15	8.43154e-14
AT3G26820		3.70152	1.77774e-05	5.75616e-05		AT1G02610		-1.83161	6.96891e-15	7.06197e-14
AT1G78320	GSTU23	3.70069	2.95983e-25	5.90699e-24		AT3G48550		-1.83108	1.56348e-05	5.10865e-05
AT3G58200		3.69926	8.25607e-30	2.11706e-28		AT2G14100	CYP705A13	-1.83086	7.0757e-15	7.16741e-14
AT5G44420	PDF1.2A	3.69793	0.00031135	0.000807017		AT2G22630	AGL17	-1.82933	3.9906e-05	0.000121709
AT5G39370		3.6964	0.00108079	0.00254352		AT3G24020	DIR16	-1.82884	0.000139121	0.000383769
AT4G31710	ATGLR2.4	3.69614	8.3196e-05	0.000239311		AT5G16030		-1.82812	1.59318e-05	5.19658e-05
AT1G14520	MIOX1	3.69596	1.16629e-19	1.69799e-18		AT5G20935		-1.82803	0.000119466	0.000333321
AT2G16230		3.69524	8.11293e-22	1.35064e-20		AT5G14910		-1.82627	2.77719e-12	2.21159e-11
AT1G05680	UGT74E2	3.69277	2.66554e-41	1.15583e-39		AT2G21385		-1.82561	1.18448e-16	1.39467e-15
AT1G79360	2025-10-02	3.69265	1.53363e-32	4.48811e-31		AT2G25840	OVA4	-1.82496	2.61646e-11	1.87535e-10
AT5G06070	RBE	3.69041	1.82589e-06	6.81094e-06		AT1G04280		-1.82406	2.1415e-06	7.90243e-06
AT2G32670	VAMP725	3.68827	1.02475e-24	1.98737e-23		AT3G29035	NAC59	-1.8233	8.12891e-11	5.49307e-10
AT5G25380	CYCA2-1	3.68764	1.30638e-52	8.67728e-51		AT2G11910		-1.82266	7.98172e-13	6.74069e-12
AT1G66145	CLE18	3.68595	0.00103046	0.00243608		AT2G02450	NAC035	-1.82258	2.93362e-06	1.06331e-05
AT1G06163		3.68571	0.00107012	0.00251956		AT1G54310		-1.82256	1.10794e-19	1.61483e-18
AT4G34332		3.6842	8.27684e-05	0.000238186		AT3G29630	UGT79B4	-1.82233	0.00383384	0.00807998
AT1G26240		3.68289	0.00118555	0.00276962		AT5G49960		-1.82201	9.12342e-07	3.55938e-06
AT3G02590	HDF7	3.68256	5.60476e-06	1.95799e-05		AT3G24110		-1.82174	8.70082e-06	2.9566e-05
AT2G38870		3.68125	5.9685e-58	4.7939e-56		AT1G31330	PSAF	-1.82104	4.93354e-07	2.00444e-06
AT1G05937		3.68116	6.22839e-16	6.88631e-15		AT3G06750		-1.82102	1.7566e-06	6.57034e-06
AT3G55566		3.6792	1.86311e-06	6.94582e-06		AT2G04090	DTX5	-1.82011	1.54447e-07	6.78257e-07
AT3G50930	HSR4	3.67767	7.52114e-33	2.24379e-31		AT1G78460		-1.81973	6.88733e-06	2.37593e-05
AT4G21930		3.67764	1.14509e-06	4.39904e-06		AT3G63510		-1.81898	2.73197e-21	4.40762e-20
AT3G12730	PHL12	3.67701	1.02806e-33	3.18344e-32		AT5G23210	SCPL34	-1.81852	0.000133279	0.000368902
AT1G42980	FH12	3.67271	8.54781e-12	6.52623e-11		AT3G57190	PRFB3	-1.81849	1.45999e-08	7.36889e-08
AT4G24420		3.67268	1.62862e-05	5.30226e-05		AT1G10360	GSTU18	-1.81803	1.61841e-05	5.27363e-05
AT2G45290	TKL-2	3.67254	6.38644e-51	4.02685e-49		AT4G13670	PTAC5	-1.81706	5.50111e-16	6.11329e-15
AT3G63350	HSFA7B	3.67162	0.00118526	0.00276917		AT4G09840		-1.81699	0.000342888	0.000881673
AT1G06520	GPAT1	3.67068	2.37498e-49	1.39632e-47		AT1G73090		-1.81638	1.29162e-06	4.92353e-06
AT4G30460		3.66971	2.71929e-41	1.17719e-39		AT3G20100	CYP705A19	-1.81624	6.33893e-05	0.000186615
AT3G12220	SCPL16	3.66938	4.03021e-18	5.27606e-17		AT4G16920		-1.81482	4.21121e-06	1.4987e-05
AT3G48640		3.66808	4.10927e-05	0.000125036		AT1G21540	AEE9	-1.81461	3.41511e-05	0.000105476
AT5G24110	WRKY30	3.66575	3.51266e-33	1.06128e-31		AT4G08450		-1.81436	0.00156251	0.00356008
AT1G02070		3.66347	3.22736e-13	2.8366e-12		AT1G20990		-1.81383	0.000685143	0.00167165
AT4G28556	RIC7	3.66291	8.63547e-06	2.93592e-05		AT2G04270	RNE	-1.81361	9.25083e-13	7.73738e-12
AT1G21245		3.66271	0.000307822	0.000798824		AT3G54890	LHCA1	-1.81344	3.76738e-10	2.32052e-09
AT2G33705		3.66108	0.00126267	0.0029322		AT2G34200		-1.81254	3.56506e-20	5.39179e-19
AT4G05030		3.65966	0.000114794	0.00032128		AT3G04260	PTAC3	-1.81254	4.03146e-08	1.91969e-07
AT5G17780		3.65861	1.57907e-74	2.0406e-72		AT3G48460		-1.81237	1.28078e-06	4.88436e-06
AT4G17670	FLZ2	3.65658	9.85666e-24	1.81965e-22		AT3G47790	ABCA8	-1.81104	3.3459e-07	1.39612e-06
AT4G09865		3.65603	0.00121638	0.00283352		AT1G61190		-1.81034	7.09614e-06	2.44345e-05
AT5G60250		3.6541	8.90342e-162	8.60796e-159		AT3G55760		-1.8102	1.33603e-19	1.93539e-18
AT5G11410		3.65328	2.17508e-28	5.17578e-27		AT3G51870	EAAC	-1.81006	2.84243e-09	1.5634e-08
AT2G24010	scpl23	3.6508	2.14246e-25	4.31201e-24		AT5G40380	CRK42	-1.80992	3.80956e-05	0.000116651
AT1G32880		3.64395	0.000251423	0.000663322		AT5G63420	emb2746	-1.80964	3.24413e-19	4.55294e-18
AT1G20750		3.64218	0.000108727	0.000306008		AT1G19715	JAL3	-1.80925	5.54781e-08	2.58838e-07
AT1G22090	EMB2204	3.63968	0.000133678	0.00036989		AT4G12310	CYP706A5	-1.80868	0.000651644	0.00159648
AT3G02840		3.63957	2.61425e-09	1.44276e-08		AT5G56200		-1.80786	0.0181936	0.0330589
AT3G12460		3.63625	2.61549e-25	5.23178e-24		AT3G01795		-1.80769	9.03202e-11	6.07034e-10
AT1G26420	FOX5	3.63594	1.41724e-34	4.51717e-33		AT3G23430	PHO1	-1.80757	4.89022e-12	3.81285e-11
AT1G51190	PLT2	3.63475	5.94457e-19	8.16722e-18		AT3G27830	RPL12A	-1.80754	2.49721e-10	1.58452e-09
AT2G27300	NTL8	3.63459	3.53307e-12	2.78717e-11		AT3G17100	BHLH147	-1.80547	2.16782e-10	1.39004e-09
AT3G21230	4CL4	3.62968	3.11264e-49	1.81367e-47		AT2G20260	PSAE2	-1.80535	3.43816e-10	2.13233e-09
AT1G35610		3.62945	2.35623e-09	1.30644e-08		AT4G02770	PSAD1	-1.80532	8.25918e-08	3.76985e-07
AT4G10250	HSP22.0	3.62906	3.18549e-09	1.74254e-08		AT1G64510		-1.8053	1.17441e-08	6.00758e-08
AT2G04040	DTX1	3.62847	1.32369e-34	4.22933e-33		AT4G39040		-1.80498	5.96284e-13	5.10675e-12
AT3G45860	CRK4	3.62716	1.89998e-42	8.70126e-41		AT1G23090	SULTR3	-1.80426	1.17964e-05	3.93122e-05
AT3G07120		3.62507	3.64358e-33	1.09956e-31		AT5G48570	FKBP65	-1.8032	5.55051e-09	2.96058e-08
AT4G27190		3.62358	7.57419e-05	0.000219661		AT5G01920	STN8	-1.80313	2.25218e-07	9.6142e-07
AT5G06720	PER53	3.62278	1.10284e-23	2.02594e-22		AT5G07240	IQD24	-1.80311	2.80021e-10	1.76367e-09
AT2G21510		3.62249	4.9674e-27	1.10545e-25		AT3G13120	RPS10	-1.80308	4.27419e-09	2.30524e-08
AT3G49120	PER34	3.61989	1.92281e-95	4.44186e-93		AT4G01800	AGY1	-1.8028	8.27035e-12	6.32364e-11
AT3G50160		3.61846	0.00135434	0.00312441		AT5G26200		-1.80217	6.6047e-10	3.94981e-09
AT2G32550		3.61669	4.70551e-22	7.95033e-21		AT3G03265		-1.80208	7.56932e-30	1.94478e-28
AT3G47420	ATPS3	3.6145	4.1173e-82	6.84573e-80		AT1G62280	SLAH1	-1.80197	0.0011228	0.00263387
AT4G25250	PMEI4	3.6142	8.37888e-25	1.63592e-23		AT3G50820	PSBO2	-1.80151	2.21629e-08	1.09406e-07
AT5G59040	COPT3	3.61348	0.0014095	0.00324087		AT5G04770	CAT6	-1.80003	1.04498e-11	7.88839e-11
AT1G70130	LECRK52	3.61342	0.000325105	0.00083942		AT1G60950	FD2	-1.79989	3.98339e-07	1.64114e-06
AT1G09155	PP2B15	3.61199	1.10598e-32	3.27331e-31		AT5G08650		-1.79885	1.01917e-13	9.36779e-13
AT1G54840	IDM2	3.608	4.55731e-31	1.2405e-29		AT1G54970	PRP1	-1.79797	1.42391e-08	7.20344e-08
AT5G45640		3.60762	0.00147101	0.00336807		AT5G40500		-1.79774	1.12986e-08	5.79222e-08
AT1G10530		3.60415	8.34259e-13	7.025e-12		AT3G05860		-1.7974	0.00328696	0.00702215
AT3G06605		3.60232	0.00144146	0.00330679		AT5G38510	RBL9	-1.797	7.53255e-35	2.43957e-33
AT4G23680		3.60055	3.07723e-112	1.13138e-109		AT2G40130	SMXL8	-1.79571	7.81733e-05	0.000226134
AT3G19940	STP10	3.597	0.00151372	0.00345736		AT3G20460		-1.79559	3.54479e-08	1.70098e-07
AT4G39404		3.59311	3.57161e-18	4.704e-17		AT4G18740		-1.7954	2.2424e-07	9.5803e-07
AT1G28480	GRXC9	3.5884	1.7909e-09	1.00797e-08		AT4G39110		-1.7929	9.37459e-10	5.4881e-09
AT4G23310	CRK23	3.58585	1.68698e-13	1.52325e-12		AT1G18010		-1.79266	2.73825e-07	1.15569e-06
AT4G03965		3.58557	5.522e-22	9.28778e-21		AT2G46820	CURT1B	-1.79213	1.41521e-07	6.24982e-07
AT1G29290	CEP14	3.58439	5.88576e-60	5.10438e-58		AT3G50685		-1.79212	1.30951e-06	4.9859e-06
AT2G41850	ADPG2	3.58256	1.21845e-05	4.05487e-05		AT1G08610		-1.79124	3.16274e-10	1.97277e-09
AT5G05220		3.58113	4.48269e-06	1.58925e-05		AT5G04980	IP5P10	-1.7912	1.22735e-07	5.46175e-07
AT5G20690	PRK6	3.58034	6.7668e-07	2.69474e-06		AT1G20190	EXPA11	-1.79106	3.35681e-39	1.34809e-37
AT5G10510	AIL6	3.57466	3.85813e-55	2.82108e-53		AT3G62910	APG3	-1.79092	1.94583e-18	2.59815e-17
AT5G55620		3.5732	8.68359e-32	2.46924e-30		AT4G05120	ENT3	-1.79066	7.11403e-05	0.000207352
AT5G20150	SPX1	3.56622	1.35109e-48	7.66713e-47		AT4G26555	FKBP16-1	-1.79036	8.17493e-07	3.21722e-06
AT3G25795		3.56547	3.04324e-09	1.66962e-08		AT2G17880		-1.78993	1.10257e-07	4.9368e-07
AT1G31095		3.56527	0.00168561	0.00381425		AT5G16600	MYB43	-1.78934	3.93803e-08	1.87828e-07
AT2G16580		3.56314	2.90115e-15	3.02684e-14		AT1G62670	RPF2	-1.78883	4.21222e-09	2.27464e-08
AT3G47720	SRO4	3.56066	2.17148e-13	1.94058e-12		ATCG00100	TRNG.1	-1.78852	0.000420227	0.00106408
AT3G18485	ILR2	3.56047	3.31429e-21	5.32407e-20		AT1G64930	CYP89A7	-1.78843	0.00643392	0.0129283
AT3G18715	IDL4	3.5584	3.9394e-09	2.13172e-08		AT2G21530		-1.78814	3.16716e-08	1.5299e-07
AT1G65490		3.55807	2.95806e-21	4.76061e-20		AT5G38520		-1.78809	7.43306e-11	5.04636e-10
AT2G25150	SCT	3.5577	3.33862e-15	3.46388e-14		AT5G45970	ARAC2	-1.78765	0.00157029	0.00357592
AT3G53080		3.55678	0.00168207	0.00380722		AT3G25570	SAMDC3	-1.7865	1.51317e-06	5.70887e-06
AT5G27765		3.55678	0.00168207	0.00380722		ATCG00590	ORF31	-1.78646	0.0092088	0.0178939
AT4G04680		3.55416	0.00174034	0.00392856		AT5G46390	CTPA1	-1.78514	4.70075e-08	2.21535e-07
AT2G35550	BPC7	3.55216	2.2857e-21	3.70827e-20		AT5G11190	SHN2	-1.78398	0.00153334	0.00349912
AT1G44130		3.55057	3.34632e-06	1.20386e-05		AT1G08980	AMI1	-1.7839	9.14623e-08	4.14214e-07
AT1G02450	NIMIN-1	3.55053	8.29529e-08	3.78368e-07		AT5G28490	LSH1	-1.78383	0.00561812	0.0114315
AT2G25297		3.55051	7.37473e-16	8.09206e-15		ATCG00410	TRNF	-1.78307	0.00884474	0.0172687
AT1G47890	AtRLP7	3.54988	3.26724e-15	3.39253e-14		AT2G35650	CSLA7	-1.78226	2.83075e-08	1.37656e-07
AT5G64890	PEP2	3.54978	2.25211e-14	2.18222e-13		AT1G19050	ARR7	-1.78206	6.3021e-07	2.51891e-06
AT1G68460	IPT1	3.54657	3.17966e-14	3.04706e-13		AT3G63190	RRF	-1.78182	2.40137e-10	1.52779e-09
AT3G47030		3.54614	1.71323e-19	2.45321e-18		AT1G18000		-1.78144	2.80228e-07	1.18099e-06
AT5G41460		3.54566	2.33042e-28	5.53532e-27		AT4G34220		-1.78138	2.74095e-11	1.95919e-10
AT2G23590	MES8	3.54411	7.7605e-51	4.88145e-49		AT2G18450	SDH1-2	-1.78104	3.15699e-05	9.8049e-05
AT1G22600		3.53876	1.30956e-16	1.53916e-15		AT4G15450		-1.78066	5.77827e-08	2.69062e-07
AT5G20410	MGD2	3.53812	1.32851e-57	1.05409e-55		AT3G15840	PIFI	-1.78028	6.73445e-12	5.19953e-11
AT1G04778		3.53759	1.09335e-08	5.61497e-08		AT4G26540	RGI3	-1.77998	1.91085e-11	1.39527e-10
AT5G07525		3.53609	0.000691989	0.00168678		AT3G19030		-1.77982	5.63806e-07	2.26739e-06
AT1G12672		3.53403	0.0018971	0.00425248		AT1G17590	NFYA8	-1.77944	1.66087e-09	9.39038e-09
AT3G05550		3.53094	2.24219e-14	2.17342e-13		AT2G41940	ZFP8	-1.77917	2.52262e-05	7.96162e-05
AT2G22340		3.53081	0.00189955	0.00425739		AT1G80380	GLYK	-1.77887	1.93744e-10	1.24969e-09
AT2G36500	CBSCBSPB2	3.52993	5.24231e-27	1.16563e-25		AT2G47910	CRR6	-1.77849	3.0637e-09	1.67979e-08
AT5G62520	SRO5	3.52891	3.30509e-37	1.20162e-35		AT5G07870		-1.7778	8.16731e-05	0.000235346
AT2G38250	GT-3B	3.52689	5.7358e-32	1.64536e-30		AT1G14205		-1.77711	5.89283e-10	3.55421e-09
AT3G56891	HIPP45	3.52391	1.09233e-19	1.59386e-18		AT1G14490		-1.77607	7.22419e-07	2.86248e-06
AT1G55525		3.5201	0.000631592	0.00155056		AT4G15660	GRXS8	-1.77569	0.00108088	0.00254352
AT1G77640	ERF013	3.51799	1.21821e-19	1.76963e-18		AT4G05200	CRK25	-1.77536	7.41672e-22	1.23789e-20
AT5G09730	BXL3	3.51739	1.47004e-17	1.8449e-16		AT1G03400		-1.77516	2.35505e-12	1.88984e-11
AT4G12870		3.51604	3.11431e-76	4.37075e-74		AT2G15050	LTP7	-1.77456	3.40982e-06	1.22502e-05
AT5G04120	IPSP	3.51508	1.09792e-06	4.22966e-06		AT5G50450		-1.7745	4.99587e-07	2.02692e-06
AT5G28910		3.51468	1.31713e-32	3.87188e-31		AT4G04350	EMB2369	-1.7745	1.78976e-10	1.15703e-09
AT1G24000		3.51325	0.000209828	0.000561378		AT5G19170		-1.77444	7.49723e-05	0.000217598
AT2G44460	BGLU28	3.50937	7.64182e-11	5.18404e-10		AT1G18880	NPF2.9	-1.77442	1.06471e-07	4.77876e-07
AT2G38940	PHT1-4	3.50867	1.76875e-47	9.72031e-46		AT1G68723		-1.77376	0.0014049	0.00323058
AT5G63250		3.50835	0.00214493	0.00475954		AT2G29060	SCL33	-1.77288	1.01491e-11	7.67918e-11
AT1G22990	HIPP22	3.50697	7.58723e-32	2.1622e-30		AT4G33470	HDA14	-1.77246	9.36793e-13	7.8278e-12
AT1G52940	PAP5	3.50591	0.00211875	0.00470744		AT1G03870	FLA9	-1.77234	2.73004e-05	8.56858e-05
AT5G11360		3.50273	7.77684e-17	9.29518e-16		AT2G29320		-1.77171	0.00183852	0.00412982
AT1G07540	TRP5	3.50197	0.000345763	0.00088819		AT4G26150	GATA22	-1.77077	3.15914e-05	9.8104e-05
AT5G58400	PER68	3.50157	5.67725e-06	1.98074e-05		AT5G61250	AtGUS1	-1.77044	2.68036e-12	2.13643e-11
AT3G51238		3.49797	8.37127e-12	6.39519e-11		AT2G20080	SPEAR1	-1.77038	8.18822e-07	3.22148e-06
AT2G02660		3.49631	0.00202908	0.00452633		AT4G37610	BT5	-1.77023	0.000311537	0.000807422
AT1G64920	UGT79B11	3.49555	7.43105e-16	8.15043e-15		AT4G22890	PGRL1A	-1.76905	1.234e-23	2.26369e-22
AT5G17220	GSTF12	3.49195	1.88175e-12	1.52456e-11		AT4G28780		-1.76843	2.34494e-05	7.44403e-05
AT2G26440	PME12	3.49159	1.34648e-44	6.68223e-43		AT4G16410		-1.76795	7.42494e-09	3.89589e-08
AT3G46660	UGT76E12	3.49135	2.17221e-12	1.7501e-11		AT5G01060		-1.7671	3.05714e-05	9.52196e-05
AT1G23750		3.48861	1.36352e-43	6.50703e-42		AT1G49310		-1.76708	1.22092e-12	1.00794e-11
AT1G20310		3.48536	3.17032e-08	1.53114e-07		AT1G79860	ROPGEF12	-1.76687	0.00186948	0.00419794
AT5G60900	RLK1	3.4842	7.04214e-24	1.31212e-22		AT3G53170		-1.7662	1.918e-11	1.39971e-10
AT1G09380		3.48224	7.73616e-19	1.05399e-17		AT1G06680	PSBP1	-1.76615	6.8761e-09	3.62834e-08
AT5G53290	CRF3	3.48179	6.60642e-22	1.1076e-20		AT1G08810	MYB60	-1.76608	0.00103638	0.00244897
AT1G69430		3.48068	1.17189e-24	2.26433e-23		AT4G37540	LBD39	-1.76592	2.46995e-10	1.56951e-09
AT3G48346		3.48056	1.2035e-06	4.60986e-06		AT5G14070	GRXC8	-1.76558	0.00325533	0.00696362
AT2G35070		3.47974	6.29489e-06	2.1831e-05		AT4G37510	RNC1	-1.76546	5.99946e-11	4.12132e-10
AT5G63087		3.47704	3.52067e-07	1.4639e-06		AT3G47070		-1.7647	1.29986e-14	1.28626e-13
AT2G32020		3.47648	2.5121e-38	9.70059e-37		AT5G51780		-1.76464	1.07894e-08	5.54534e-08
AT2G28500	LBD11	3.46629	2.58714e-26	5.53564e-25		AT5G49450	BZIP1	-1.76432	5.58654e-08	2.60459e-07
AT5G66710		3.46582	7.02263e-05	0.000204917		AT2G37660		-1.76427	2.11248e-09	1.17764e-08
AT1G19960		3.46486	6.31208e-43	2.94233e-41		AT2G32880		-1.76424	0.000262553	0.000689783
AT1G02220	NAC003	3.46476	5.38536e-17	6.51434e-16		AT2G36420		-1.76417	0.000140114	0.000386305
AT5G54020		3.46421	1.26218e-32	3.71452e-31		AT1G64200	VHA-E3	-1.76353	2.30166e-16	2.65265e-15
AT3G12500	CHI-B	3.46141	8.73933e-86	1.61795e-83		AT3G49960	PER35	-1.76353	8.25977e-10	4.87261e-09
AT5G18510		3.46012	0.000792989	0.00191173		AT5G22390		-1.76316	1.59109e-05	5.19106e-05
AT5G14000	anac084	3.45933	2.61345e-26	5.58278e-25		AT3G25930		-1.76304	2.62954e-17	3.23781e-16
AT2G43960		3.45901	0.00244833	0.00536348		AT1G74070	CYP26-2	-1.76257	4.02663e-11	2.82177e-10
AT1G08397		3.45889	0.00229133	0.0050522		AT5G23860	TUBB8	-1.76211	6.50127e-09	3.44028e-08
AT5G66985		3.45821	5.81442e-16	6.44773e-15		AT1G29670		-1.76195	3.36054e-06	1.20831e-05
AT5G37485		3.45776	2.19831e-14	2.13564e-13		AT3G10060	FKBP16-4	-1.7617	2.07895e-09	1.16034e-08
AT4G26950		3.4534	1.24388e-14	1.23321e-13		AT1G12330		-1.76155	1.8642e-09	1.04652e-08
AT4G28130	DGK6	3.45306	0.00241858	0.00530632		AT5G51200		-1.76145	1.94746e-08	9.68128e-08
AT1G49005	CLE11	3.45116	0.000602644	0.00148508		AT4G38730		-1.76112	3.93929e-06	1.40672e-05
AT5G43770		3.44901	0.00144001	0.00330432		AT4G38970	FBA2	-1.76088	6.37601e-09	3.37811e-08
AT1G17150		3.44758	0.00014104	0.00038861		AT2G35000	ATL9	-1.75776	1.65353e-06	6.20078e-06
AT3G14395		3.44351	2.67496e-12	2.13278e-11		AT5G44020		-1.75746	0.000229623	0.000610594
AT1G53860		3.44234	3.61813e-26	7.68492e-25		AT1G11410		-1.75707	3.55542e-12	2.80226e-11
AT5G01380	GT-3A	3.44097	1.36665e-41	6.06719e-40		AT2G31040	CGL160	-1.75551	5.0675e-17	6.14694e-16
AT3G25573		3.43854	0.00253807	0.00554379		AT3G23880		-1.75526	4.7984e-10	2.92112e-09
AT3G54320	WRI1	3.4365	9.61757e-43	4.44349e-41		AT5G21170	AKINBETA1	-1.75501	6.66839e-14	6.22574e-13
AT4G16215		3.43469	0.00253398	0.00553578		ATCG00210	PETN	-1.75465	1.20728e-06	4.62296e-06
AT4G06795		3.43462	2.6896e-07	1.13644e-06		AT5G51390		-1.75421	1.25897e-07	5.59293e-07
AT4G00770		3.43306	2.82077e-09	1.55181e-08		AT3G17580		-1.75342	7.41422e-05	0.000215404
AT2G22760	BHLH19	3.42724	0.000686261	0.00167406		AT1G56500	SOQ1	-1.75307	1.71894e-14	1.68498e-13
AT2G29110	ATGLR2.8	3.42593	2.23181e-13	1.99245e-12		AT1G49450		-1.75293	0.00177851	0.0040064
AT5G27630	ACBP5	3.42356	1.01782e-46	5.4557e-45		AT2G26690	NPF6.2	-1.75289	1.20029e-05	3.99799e-05
AT4G10860		3.42163	0.000810877	0.00195107		AT3G26510		-1.7527	5.58253e-14	5.24762e-13
AT2G21900	WRKY59	3.42063	0.000225939	0.000601214		AT1G79040	PSBR	-1.75263	1.23716e-10	8.17384e-10
AT1G21520		3.4147	8.47834e-30	2.16979e-28		AT4G11290	PER39	-1.75223	0.00100903	0.00238822
AT3G01565		3.41125	5.43682e-05	0.000162068		AT1G53875		-1.75213	0.0122192	0.0231407
AT4G24070		3.41122	0.00059199	0.00146075		AT5G01930	MAN6	-1.75186	3.70766e-10	2.2886e-09
AT3G53370	S1FA1	3.40753	9.71434e-77	1.3857e-74		AT1G49750		-1.75101	1.01042e-05	3.40027e-05
AT4G12495		3.40699	0.00332344	0.00709248		AT4G01130		-1.74925	3.97267e-11	2.78695e-10
AT1G51480		3.40629	3.68876e-10	2.27801e-09		AT5G41790	CIP1	-1.74799	1.14325e-05	3.81972e-05
AT3G20180		3.40393	6.00683e-08	2.79356e-07		AT3G59310		-1.74766	3.74991e-10	2.31194e-09
AT1G02930	GSTF6	3.39634	1.19613e-32	3.52413e-31		AT3G04115		-1.74743	0.00962183	0.0186133
AT1G19210	ERF017	3.39359	6.60886e-08	3.05774e-07		AT1G57590	PAE2	-1.74534	0.00245124	0.00536849
AT1G13520		3.3929	2.65817e-16	3.05006e-15		AT5G48220		-1.74482	3.84256e-10	2.3646e-09
AT1G56105		3.39178	0.0029532	0.00637531		AT2G32180	PTAC18	-1.74393	6.77476e-14	6.3115e-13
AT1G08650	PPCK1	3.38683	7.86013e-45	3.93821e-43		AT3G20830	UCNL	-1.74238	3.83422e-18	5.02958e-17
AT5G48670	AGL80	3.38484	3.2058e-18	4.23717e-17		AT3G18500		-1.74238	1.59784e-10	1.03885e-09
AT2G37290		3.38455	6.9757e-47	3.77005e-45		AT4G16892		-1.74237	7.3495e-06	2.52303e-05
AT5G62510		3.38382	0.00303253	0.00653037		AT3G47010		-1.74235	8.52928e-07	3.34608e-06
AT5G02360		3.3808	7.89117e-19	1.07455e-17		AT3G54120	RTNLB12	-1.74233	1.54368e-07	6.78043e-07
AT4G34860	INVB	3.38036	7.72197e-86	1.43982e-83		AT5G03940	FFC	-1.74122	8.35537e-07	3.28328e-06
AT1G24095		3.37834	2.84295e-21	4.57818e-20		AT4G34970	ADF9	-1.74094	0.000103471	0.000292728
AT4G22960		3.37773	1.79472e-22	3.12122e-21		AT3G12955		-1.73944	0.000894857	0.00213561
AT4G22110		3.37623	8.64765e-16	9.44511e-15		AT5G42750	BKI1	-1.73834	4.13828e-14	3.93393e-13
AT1G74000	SSL11	3.37466	1.44743e-41	6.4149e-40		AT4G21210	RP1	-1.73834	7.42218e-09	3.89523e-08
AT1G21320	NSRB	3.3717	4.58117e-49	2.65749e-47		AT2G18350	ZHD6	-1.73805	1.40703e-11	1.04137e-10
AT5G05640		3.37161	9.83888e-24	1.81765e-22		AT1G77690	LAX3	-1.73777	5.72045e-09	3.04748e-08
AT4G14390		3.37139	1.60679e-30	4.26691e-29		AT1G70940	PIN3	-1.73762	2.15939e-05	6.8961e-05
AT3G13950		3.371	4.76968e-32	1.37123e-30		AT4G22570	APT3	-1.7367	3.51156e-08	1.68565e-07
AT1G66960		3.36705	6.02761e-18	7.80093e-17		AT4G23493		-1.73563	0.000109837	0.000308764
AT3G24240	RCH2	3.36664	1.34226e-35	4.52693e-34		AT1G73655	FKBP17-3	-1.73479	5.69263e-11	3.91917e-10
AT5G35900	LBD35	3.36455	0.00339571	0.00723605		AT4G38460	GGR	-1.73434	4.65263e-12	3.63303e-11
AT4G21950		3.36387	0.00318109	0.00681822		AT1G61480		-1.73432	7.23035e-08	3.32876e-07
AT5G20045		3.35869	1.23462e-10	8.16118e-10		AT5G49660	CEPR1	-1.73413	1.77341e-05	5.74355e-05
AT1G67360		3.35652	1.54692e-24	2.97135e-23		AT4G25190	QWRF7	-1.73397	0.000153258	0.000419752
AT2G45080	CYCU2-1	3.35499	1.41131e-20	2.18771e-19		AT4G32860		-1.73369	0.00250216	0.00547176
AT2G40750	WRKY54	3.35421	1.01199e-12	8.41252e-12		AT5G43700	IAA4	-1.73364	1.70422e-43	8.07385e-42
AT2G18193		3.35345	1.9406e-38	7.53832e-37		AT3G47740	ABCA3	-1.73324	0.00232933	0.00512472
AT2G01379		3.35281	0.0034968	0.00743327		AT5G19800		-1.73286	7.92696e-06	2.70693e-05
AT2G43520	ATTI2	3.35049	7.20571e-22	1.20576e-20		AT3G19370		-1.73274	1.91806e-07	8.29093e-07
AT5G11440	CID5	3.34759	7.63394e-12	5.86625e-11		AT2G32645		-1.73176	0.00582987	0.0118274
AT3G13898		3.34669	1.35917e-07	6.0166e-07		AT2G38170	CAX1	-1.73154	1.56035e-05	5.09996e-05
AT3G53450	LOG4	3.3428	1.17461e-11	8.81096e-11		AT2G37930		-1.73146	3.16824e-11	2.25044e-10
AT4G35390	AHL25	3.34075	9.38458e-21	1.46692e-19		AT4G18640	MDIS2	-1.73109	2.77758e-09	1.52869e-08
AT1G14260		3.34013	4.24385e-15	4.35291e-14		AT5G14320	RPS13	-1.73063	1.11517e-08	5.72253e-08
AT4G28190	ULT1	3.33589	1.95288e-38	7.57475e-37		AT5G45960		-1.72841	0.00707794	0.0141038
AT1G63020	NRPD1	3.33469	6.28812e-37	2.24242e-35		AT5G19600	SULTR3	-1.72784	0.00175149	0.00395236
AT1G27890	CAF1-4	3.33455	0.000927775	0.00220619		AT4G33730		-1.72774	6.21735e-08	2.88324e-07
AT1G10520	POLL	3.33335	2.60606e-28	6.18443e-27		ATCG00180	RPOC1	-1.7277	3.0037e-08	1.45605e-07
AT4G21926		3.3318	0.000449405	0.00113105		AT2G28970		-1.72726	1.38242e-09	7.92072e-09
AT1G80160		3.3309	1.43028e-22	2.49405e-21		AT1G08315		-1.72702	1.1446e-05	3.82324e-05
AT3G04380	SUVR4	3.3278	2.10088e-30	5.53953e-29		AT1G52240	ROPGEF11	-1.72441	0.000907184	0.00216385
AT2G32680	AtRLP23	3.32744	6.60765e-16	7.28096e-15		AT2G37700		-1.72428	0.00489678	0.0100769
AT1G15415		3.32636	1.34125e-13	1.21993e-12		AT1G51100		-1.72347	3.31284e-09	1.80841e-08
AT2G41690	HSFB3	3.32491	3.73094e-22	6.3822e-21		AT3G60160	ABCC9	-1.72343	4.94533e-17	6.00153e-16
AT4G27670	HSP21	3.32414	0.000138338	0.00038177		AT3G05890	RCI2B	-1.72342	2.39996e-15	2.52412e-14
AT3G23630	IPT7	3.3223	0.000120837	0.000336784		AT5G56040		-1.72306	4.3452e-10	2.66073e-09
AT1G06707		3.32118	0.00368566	0.00779915		AT5G44610	PCAP2	-1.72285	3.36439e-11	2.38393e-10
AT5G14602		3.31716	0.00377737	0.00797383		AT5G65590	DOF5.7	-1.72274	1.98136e-17	2.4641e-16
AT4G13800		3.31712	1.68906e-05	5.48398e-05		AT1G24577		-1.72266	0.00054359	0.00134987
AT1G09293		3.31707	0.00393556	0.00827166		AT5G40020		-1.72159	9.60407e-09	4.97233e-08
AT1G28390		3.31627	1.73692e-59	1.47209e-57		AT2G23760	BLH4	-1.72137	1.19837e-14	1.19079e-13
AT3G15240		3.31499	1.34383e-25	2.74271e-24		AT5G40340		-1.72099	7.81047e-08	3.57567e-07
AT1G12200		3.31157	5.8236e-37	2.07961e-35		AT5G40180		-1.72046	0.00412605	0.00862756
AT3G19700	IKU2	3.30992	2.38056e-05	7.54886e-05		AT4G20160		-1.71983	0.00106663	0.00251362
AT2G32960	DSP2	3.30905	1.12844e-32	3.33598e-31		AT5G66470		-1.7191	4.35127e-10	2.6632e-09
AT1G66870		3.30753	0.000630125	0.00154754		AT3G46610		-1.71846	1.22526e-10	8.10959e-10
AT4G00390		3.30697	6.16529e-14	5.7767e-13		AT1G03600	PSB27-1	-1.71844	3.18135e-13	2.79804e-12
AT2G32140		3.30674	6.30058e-09	3.34153e-08		AT1G08520	CHLD	-1.71789	2.03209e-06	7.53277e-06
AT3G60870	AHL18	3.30669	4.07782e-13	3.55061e-12		AT2G26570	WEB1	-1.71786	1.22804e-08	6.25987e-08
AT1G09930	OPT2	3.30646	2.17505e-06	8.01715e-06		AT2G39570	ACR9	-1.71764	1.16603e-14	1.1591e-13
AT2G39820	EIF6-1	3.30639	2.42075e-05	7.66233e-05		AT2G38760	ANN3	-1.7176	2.37977e-07	1.01257e-06
AT5G03055		3.30603	0.00398994	0.00837313		AT2G46250		-1.71587	5.35316e-09	2.86233e-08
AT3G44265		3.30513	0.00399727	0.00838582		AT3G51820	CHLG	-1.71555	1.17534e-07	5.24555e-07
AT4G27810		3.30476	4.17254e-22	7.09679e-21		AT3G23530		-1.71539	1.27596e-06	4.86812e-06
AT1G17020	SRG1	3.30237	1.3354e-76	1.89453e-74		AT1G74850	PTAC2	-1.71518	2.19546e-10	1.4066e-09
AT3G02695		3.29651	9.7871e-06	3.29995e-05		AT2G10931		-1.71496	4.87424e-09	2.61536e-08
AT5G13130	MORC5	3.29648	6.67883e-24	1.24532e-22		AT5G58300		-1.71488	1.33328e-10	8.75793e-10
AT1G02850	BGLU11	3.29442	1.224e-25	2.50401e-24		AT5G57030	LUT2	-1.71428	8.0473e-08	3.677e-07
AT2G24610	ATCNGC14	3.29045	3.46097e-36	1.2014e-34		AT3G25920	RPL15	-1.71224	1.63632e-09	9.26964e-09
AT2G34740		3.28351	0.000755839	0.00182892		AT3G52530		-1.71217	8.56198e-05	0.000245633
AT5G58660		3.28159	5.61836e-34	1.75223e-32		AT3G11750	FOLB1	-1.71152	4.6364e-07	1.89226e-06
AT1G51915		3.28068	0.00411509	0.00860878		AT3G60890	ZPR2	-1.7115	0.0106125	0.0203428
AT5G09980	PEP4	3.27858	1.85358e-38	7.21101e-37		AT3G58720		-1.71079	3.01624e-05	9.40244e-05
AT3G13400	sks13	3.27722	2.67148e-05	8.39691e-05		AT5G64040	PSAN	-1.70938	6.71983e-09	3.55018e-08
AT2G24285		3.27682	4.39923e-08	2.08492e-07		AT1G24405		-1.70916	0.005325	0.0108895
AT1G71890	SUC5	3.27199	1.60017e-19	2.29637e-18		AT5G17300	RVE1	-1.70899	6.61375e-08	3.05892e-07
AT5G58070	TIL	3.26849	6.39021e-24	1.19235e-22		AT3G11090	LBD21	-1.70886	7.71711e-05	0.000223533
AT1G64070	RLM1A	3.26499	0.00441369	0.00917024		AT1G19900		-1.707	8.26548e-06	2.81527e-05
AT2G38890		3.26379	0.000672377	0.00164219		AT3G01770	GTE11	-1.70638	4.14627e-52	2.71264e-50
AT5G08595		3.2637	0.00442131	0.00918535		AT4G34650	SQS2	-1.70619	0.000269731	0.00070743
AT3G50760	GATL2	3.26348	1.20996e-60	1.05989e-58		AT2G30390	FC2	-1.706	4.43561e-16	4.98438e-15
AT3G59850		3.26335	3.83026e-17	4.68095e-16		AT2G30210	LAC3	-1.70548	0.000173734	0.000471282
AT1G50580	UGT79B5	3.2632	5.62945e-19	7.7465e-18		AT5G16480	DSP5	-1.70484	9.13821e-08	4.13923e-07
AT3G59140	ABCC10	3.26224	1.00143e-28	2.43176e-27		AT4G33960		-1.70457	3.24283e-15	3.3712e-14
AT1G11420	DUF2	3.26223	8.23242e-45	4.10897e-43		AT5G45770	RLP55	-1.70402	0.00781445	0.0154315
AT1G75600		3.26014	9.48039e-08	4.28456e-07		AT2G03410		-1.70377	0.000201553	0.000541068
AT2G14692		3.25668	1.84247e-05	5.951e-05		AT1G23052		-1.70253	6.37692e-05	0.000187649
AT5G15380	DRM1	3.25644	0.000574811	0.00142199		AT1G69970	CLE26	-1.70189	5.3013e-05	0.000158372
AT5G44440		3.2547	7.07496e-07	2.80889e-06		AT5G18020	SAUR20	-1.70179	5.08341e-05	0.000152341
AT2G22240	IPS2	3.25257	9.38004e-42	4.17844e-40		AT4G13290	CYP71A19	-1.70078	0.000614668	0.00151212
AT5G09970	CYP78A7	3.25188	1.0218e-79	1.61654e-77		AT4G17810		-1.70039	2.56937e-14	2.47952e-13
AT3G23170		3.25099	5.02354e-77	7.20519e-75		AT5G22410	PER60	-1.69951	3.04412e-14	2.92146e-13
AT1G48100		3.25019	1.38244e-18	1.85921e-17		AT5G47610	ATL79	-1.69892	0.00299745	0.00646265
AT4G02330	PME41	3.24779	1.16449e-16	1.37236e-15		AT1G72640		-1.69876	1.01593e-14	1.01647e-13
AT5G09145		3.24451	0.00483245	0.00995567		AT1G31800	CYP97A3	-1.69876	3.66999e-21	5.87379e-20
AT2G46150		3.242	2.37445e-29	5.95987e-28		AT3G12780	PGK1	-1.69859	2.72056e-11	1.94622e-10
AT1G07273		3.24136	0.00175169	0.00395246		AT3G61210		-1.69804	1.51757e-21	2.49149e-20
AT2G06935		3.24119	0.000341013	0.000877458		AT1G12560	EXPA7	-1.69779	1.79827e-18	2.40481e-17
AT4G26270	PFK3	3.23972	8.70713e-38	3.27037e-36		AT4G25090	RBOHG	-1.69768	2.52611e-27	5.72409e-26
AT1G75160		3.23865	4.26878e-19	5.92725e-18		AT4G34790		-1.69764	2.47613e-08	1.21316e-07
AT5G09540		3.23801	7.90072e-35	2.55371e-33		AT5G67400	PER73	-1.69758	1.20843e-08	6.16594e-08
AT5G24655	LSU4	3.23644	8.3468e-19	1.13482e-17		AT2G26710	CYP734A1	-1.6973	1.33951e-11	9.95628e-11
AT5G52760	HIPP14	3.23555	1.39309e-15	1.50083e-14		AT1G05230	HDG2	-1.69699	2.34835e-05	7.45394e-05
AT5G52740	HIPP12	3.23263	6.89245e-09	3.63493e-08		AT2G04030	HSP90-5	-1.69662	1.63352e-24	3.13349e-23
AT2G26515		3.23167	5.18814e-20	7.75666e-19		AT4G27570	UGT79B3	-1.6964	0.00545754	0.0111317
AT2G32885		3.23087	2.76136e-14	2.66282e-13		AT1G67230	CRWN1	-1.69628	6.39827e-09	3.38852e-08
AT2G18880	VIL3	3.22825	7.60508e-05	0.000220508		AT1G29179		-1.69587	0.00397755	0.00835184
AT4G29640	CDA5	3.22658	0.00505144	0.0103747		AT3G55250	PSA3	-1.69582	1.44259e-11	1.06557e-10
AT2G31690		3.22536	0.00558496	0.0113659		AT5G38940		-1.69558	1.03192e-09	6.0034e-09
AT1G70960		3.22509	0.00506735	0.010405		AT1G75350	RPL31	-1.69556	7.61532e-13	6.45004e-12
AT3G08370		3.22509	0.00506735	0.010405		AT2G35410		-1.69548	7.08423e-07	2.81215e-06
AT1G74205		3.22086	2.92777e-07	1.2311e-06		AT2G22850	AtbZIP6	-1.69507	0.00278538	0.00604703
AT2G39410		3.22085	1.93907e-74	2.49348e-72		AT2G35830		-1.69499	2.26492e-09	1.25715e-08
AT5G35770	SAP	3.22004	5.24782e-07	2.11959e-06		AT3G49670	BAM2	-1.69493	3.62724e-07	1.50485e-06
AT2G04805		3.21976	9.51207e-24	1.76101e-22		ATCG00140	ATPH	-1.69475	2.20234e-11	1.59164e-10
AT4G24410		3.21874	5.2682e-09	2.81863e-08		AT2G18890		-1.6944	1.52076e-16	1.78097e-15
AT4G25420	GA20OX1	3.2186	6.67698e-08	3.08652e-07		AT3G14570	CALS8	-1.69353	3.89697e-05	0.000119104
AT1G74030	ENO1	3.21853	4.65535e-38	1.77147e-36		AT1G14345		-1.69351	7.0689e-07	2.80692e-06
AT1G72960		3.21802	2.49928e-05	7.89082e-05		AT5G60142		-1.69324	0.00391888	0.00824057
AT5G07780	FH19	3.21682	4.76653e-17	5.80073e-16		AT4G07995		-1.69284	0.00509893	0.0104616
AT5G60460		3.21625	3.58393e-47	1.94501e-45		AT3G21460	GRXS10	-1.69276	0.00593506	0.0120212
AT5G19550	ASP2	3.21322	1.91558e-48	1.08235e-46		AT3G26580		-1.69036	4.9727e-14	4.69635e-13
AT3G26120	TEL1	3.21294	6.85905e-09	3.6208e-08		AT4G01840	TPK5	-1.68988	2.00558e-05	6.4372e-05
AT4G02970	AT7SL-1	3.21282	7.66451e-23	1.35644e-21		AT3G51470		-1.68985	9.74965e-20	1.4274e-18
AT1G52800		3.21225	4.11328e-24	7.73582e-23		AT4G25170		-1.68972	2.46213e-06	9.02054e-06
AT1G06983		3.21223	0.00145114	0.00332695		AT4G33666		-1.68947	3.25612e-15	3.38367e-14
AT2G35730		3.21127	2.75785e-16	3.16166e-15		AT3G23070	CFM3A	-1.68817	2.03252e-08	1.00696e-07
AT2G40100	LHCB4.3	3.21108	2.05633e-50	1.266e-48		AT3G47110		-1.68683	5.15445e-05	0.000154285
AT1G30190		3.20875	0.000201792	0.000541654		AT3G18110	EMB1270	-1.68612	2.85588e-12	2.27009e-11
AT5G39670	CML46	3.20732	9.92861e-27	2.17795e-25		AT5G02020	SIS	-1.68526	1.32746e-12	1.08934e-11
AT1G16360		3.20686	1.14452e-17	1.44611e-16		AT5G62840		-1.68523	4.45741e-10	2.72497e-09
AT3G44450	BIC2	3.20613	2.1331e-10	1.36875e-09		AT2G21330	FBA1	-1.68453	1.08473e-06	4.18255e-06
AT3G27910		3.20496	0.00247432	0.00541405		AT1G32120		-1.68417	1.41636e-14	1.39625e-13
AT1G26260	BHLH76	3.20206	1.01801e-24	1.97578e-23		AT1G12860	SCRM2	-1.6839	9.63032e-13	8.02906e-12
AT4G21840	MSRB8	3.20153	9.08551e-14	8.38346e-13		AT1G50450		-1.68347	5.05473e-20	7.56587e-19
AT2G02130	PDF2.3	3.20053	1.95211e-22	3.38816e-21		AT5G08280	HEMC	-1.68299	2.41309e-08	1.18383e-07
AT2G04945		3.19732	0.00570457	0.0115939		AT1G11340	RKS1	-1.68285	0.000572346	0.00141616
AT5G54060	A3G2XYLT	3.19675	2.49905e-05	7.89082e-05		AT5G63310	NDPK2	-1.68279	1.36166e-08	6.90724e-08
AT1G30740		3.19563	2.19255e-07	9.38884e-07		AT1G11180		-1.68276	8.00141e-09	4.18659e-08
AT3G26818	MIR169M	3.19514	8.4994e-07	3.33536e-06		AT3G63440	CKX6	-1.68268	5.37965e-05	0.00016051
AT1G74420	FUT3	3.19484	1.28406e-46	6.82669e-45		AT1G61795	RIC9	-1.68261	3.40392e-08	1.6379e-07
AT3G17790	PAP17	3.19345	3.39914e-107	1.08209e-104		AT4G11460	CRK30	-1.68246	0.000503898	0.001258
AT1G55050		3.19186	2.38905e-36	8.37099e-35		AT3G59510		-1.68241	0.0172776	0.0315638
AT2G43620		3.19115	6.83795e-29	1.67446e-27		AT2G21130	CYP19-2	-1.68235	2.01669e-19	2.87356e-18
AT1G07483		3.18966	0.00097979	0.00232323		AT3G53420	PIP2-1	-1.68162	1.58286e-08	7.96279e-08
AT3G44720	ADT4	3.1893	2.6227e-242	6.8463e-239		AT2G24440		-1.68142	9.4584e-12	7.18365e-11
AT5G45990		3.18862	2.92979e-13	2.58988e-12		AT5G12900	IRKI	-1.68058	6.68378e-06	2.30968e-05
AT1G43910		3.18824	3.66681e-19	5.12137e-18		AT3G56910	PSRP5	-1.68056	1.2293e-10	8.13217e-10
AT3G28610		3.1879	5.17404e-07	2.09108e-06		AT5G63710		-1.68024	1.03905e-05	3.48855e-05
AT3G29380	PBRP2	3.18563	0.00552043	0.0112494		AT3G06880		-1.68	0.000107984	0.000304078
AT1G04803		3.18526	0.000326622	0.000843171		AT1G29390	COR413IM2	-1.6799	1.00107e-14	1.00237e-13
AT4G06760		3.18432	0.00577455	0.0117215		AT5G44650	Y3IP1	-1.67958	1.25833e-10	8.30107e-10
AT3G48670	IDN2	3.18363	9.76933e-55	7.08385e-53		AT1G73885		-1.67859	1.99001e-08	9.87401e-08
AT4G39700	HIPP23	3.18051	6.65473e-17	7.99058e-16		AT3G15358		-1.67709	1.36589e-08	6.92738e-08
AT1G52565		3.17995	2.61037e-26	5.58076e-25		AT1G78630	RPL13	-1.6764	1.43825e-08	7.26752e-08
AT3G46190		3.17977	0.00578087	0.0117334		AT3G01660		-1.67638	6.27177e-08	2.90796e-07
AT1G03270	CBSDUF4	3.17883	2.09208e-24	3.98044e-23		AT4G37340	CYP81D3	-1.67432	2.68395e-06	9.78246e-06
AT5G52390		3.17863	3.10293e-08	1.50103e-07		AT3G29185		-1.67417	1.42901e-09	8.16436e-09
AT3G44763		3.17848	0.00579638	0.011764		AT3G18390	EMB1865	-1.67408	4.95418e-08	2.32765e-07
AT4G33420		3.1776	1.23944e-56	9.48809e-55		AT2G27050	EIL1	-1.67348	1.17657e-08	6.01629e-08
AT5G53260		3.17644	0.00639745	0.0128629		AT3G06370	NHX4	-1.67285	2.20792e-06	8.13602e-06
AT5G41280	CRRSP57	3.17497	0.0011839	0.00276625		AT2G37460		-1.6725	0.00248873	0.00544376
AT1G72590	PPRD1	3.17193	1.98989e-06	7.38367e-06		AT1G49380	CCS1	-1.67235	2.07257e-19	2.95157e-18
AT1G33030		3.17049	8.8344e-23	1.55609e-21		AT1G79410	45935	-1.67101	1.45317e-10	9.5e-10
AT3G50030		3.16978	5.79991e-05	0.000172059		AT1G20850	XCP2	-1.67098	3.13816e-06	1.13351e-05
AT4G34419		3.16934	1.05417e-14	1.05312e-13		AT1G53440		-1.66925	0.000136859	0.000377969
AT2G25940	ALPHA-VPE	3.16898	1.92014e-18	2.56516e-17		AT1G72930	TIR	-1.66893	0.000112556	0.000315525
AT3G14300	PME26	3.16843	0.00163669	0.00371514		AT5G16410		-1.66878	0.0079274	0.0156365
AT5G05905		3.16669	0.00598093	0.0121009		AT4G38690		-1.66866	1.44339e-05	4.7382e-05
AT2G38350		3.15827	0.00241103	0.00529021		AT1G32990	RPL11	-1.66802	3.05533e-09	1.67556e-08
AT2G17280	PGM	3.1555	3.6588e-26	7.76499e-25		AT4G25080	CHLM	-1.66762	1.13188e-10	7.53357e-10
AT1G73050		3.1549	0.00115808	0.00271175		AT5G07020	MPH1	-1.66663	8.24787e-12	6.3083e-11
AT3G49270		3.15411	0.00616906	0.0124459		AT3G06460		-1.66466	2.44706e-05	7.73811e-05
AT5G09300		3.15225	5.15555e-34	1.61367e-32		AT1G12250	TL20.3	-1.66444	1.78788e-11	1.30804e-10
AT4G12350	MYB42	3.15217	0.000114553	0.000320708		AT2G47450	CAO	-1.66444	8.74641e-06	2.97016e-05
AT1G11520		3.15127	0.00640465	0.0128734		AT1G76190		-1.66399	0.000378862	0.000967692
AT1G28300	LEC2	3.1494	0.000126358	0.000350825		AT4G39340	EC1.4	-1.66369	0.000520689	0.00129646
AT3G56220		3.1488	5.45115e-39	2.16586e-37		AT4G32190		-1.66346	8.54614e-08	3.88791e-07
AT1G23150		3.14777	8.30203e-26	1.71861e-24		AT1G33930	IAN6	-1.66332	3.2344e-05	0.00010031
AT1G58225		3.14127	0.00622886	0.0125549		AT2G34150	SCAR1	-1.66328	4.81369e-06	1.6976e-05
AT5G38250	LRK10L-2.3	3.14102	5.85661e-10	3.53482e-09		AT3G16690	SWEET16	-1.66327	0.000893957	0.00213386
AT5G41761		3.14049	1.05001e-23	1.93434e-22		AT2G46660	CYP78A6	-1.66136	0.0009315	0.00221436
AT2G15760		3.13845	3.00535e-16	3.42583e-15		AT5G09820	PAP7	-1.66136	2.6966e-05	8.47484e-05
AT5G64550		3.13712	2.13571e-52	1.4043e-50		AT1G33540	SCPL18	-1.66072	0.0166577	0.0305703
AT5G67080	MAPKKK19	3.13578	3.27621e-26	6.9757e-25		AT5G62380	NAC101	-1.66065	0.00409446	0.00856908
AT4G33800		3.13536	8.41857e-09	4.39078e-08		AT5G26320		-1.65999	0.000277042	0.000724568
AT1G53070		3.13485	5.80186e-50	3.47367e-48		AT2G18196	HIPP30	-1.6588	1.87577e-09	1.05233e-08
AT4G39670		3.13277	1.51042e-20	2.33579e-19		AT2G22800	HAT9	-1.65864	3.02073e-08	1.46349e-07
AT1G51920		3.13221	1.89622e-05	6.11248e-05		AT5G63020		-1.65854	5.95005e-06	2.06928e-05
AT2G17740		3.13189	9.43402e-26	1.94369e-24		AT3G44020		-1.65843	7.65079e-09	4.00876e-08
AT4G19380		3.13147	1.49117e-56	1.13818e-54		AT1G43790	TED6	-1.65833	3.71109e-11	2.61469e-10
AT1G19610	PDF1.4	3.13083	5.12428e-35	1.66996e-33		AT1G04110	SBT1.2	-1.65798	0.000173514	0.000470734
AT4G12480	EARLI1	3.12608	1.50912e-233	3.58129e-230		AT4G13100		-1.65773	3.45852e-06	1.24183e-05
AT3G26742		3.12136	2.00797e-08	9.95367e-08		AT4G19680	IRT2	-1.6575	3.16447e-12	2.50547e-11
AT3G15720		3.11908	5.52531e-29	1.36584e-27		AT2G28110	IRX7	-1.6567	1.40718e-23	2.57054e-22
AT2G32190		3.11885	3.62482e-29	9.02883e-28		AT3G48730	GSA2	-1.65665	1.37614e-08	6.97395e-08
AT2G19850		3.11749	0.00473707	0.00977444		AT1G48745		-1.65613	2.28147e-06	8.39521e-06
AT5G19270		3.11602	0.00691234	0.0138035		AT3G52380	CP33	-1.6558	3.42384e-07	1.42614e-06
AT5G12030	HSP17.7	3.11542	4.10097e-09	2.21639e-08		AT2G45530		-1.65562	2.2443e-10	1.43591e-09
AT3G09520	ATEXO70H4	3.11132	1.33942e-27	3.06704e-26		AT2G15042		-1.65526	2.05063e-09	1.14625e-08
AT5G11210	GLR2.5	3.10961	9.12396e-21	1.4296e-19		AT5G45250	RPS4	-1.65448	1.99928e-06	7.41642e-06
AT4G28560	RIC7	3.10813	1.72426e-17	2.15257e-16		AT3G49970		-1.65427	0.0028566	0.00618673
AT2G13547		3.10763	0.00158468	0.00360461		AT5G55740	CRR21	-1.65423	1.1235e-11	8.44693e-11
AT4G28390	AAC3	3.10717	1.24772e-39	5.09711e-38		AT2G22290	RABH1D	-1.65409	0.00726613	0.0144492
AT1G23550	SRO2	3.10695	1.65706e-29	4.19554e-28		AT1G80480	PTAC17	-1.65385	1.60631e-11	1.18149e-10
AT1G04880	HMGB15	3.10544	8.99802e-16	9.80728e-15		AT1G38065		-1.65369	1.12801e-05	3.77073e-05
AT5G47960	RABA4C	3.10464	6.21446e-42	2.80177e-40		AT3G06770		-1.65358	1.61561e-06	6.06294e-06
AT4G16240		3.10112	0.00354204	0.00752293		AT3G48120		-1.65341	2.19977e-30	5.78859e-29
AT5G47130		3.10036	5.14419e-12	4.00369e-11		AT1G06645		-1.65251	1.05358e-10	7.03034e-10
AT4G09080	TOC75-IV	3.09972	2.23333e-20	3.41928e-19		AT3G14900		-1.65223	2.10354e-13	1.88309e-12
AT2G15130		3.09952	1.23507e-10	8.16212e-10		AT5G42270	FTSH5	-1.65189	3.46927e-08	1.66719e-07
AT4G38560		3.09457	9.02091e-15	9.05351e-14		AT5G14470	GLCAK2	-1.65163	0.000741629	0.0017977
AT3G44444	MIR849A	3.09089	0.00155416	0.00354289		AT2G36990	SIGF	-1.65158	1.37145e-11	1.01705e-10
AT2G41290	SSL2	3.09034	9.25501e-39	3.63297e-37		AT3G05800	BHLH150	-1.65121	0.000100718	0.000285374
AT5G48090	ELP1	3.08938	6.89444e-20	1.01565e-18		AT1G22550	NPF5.16	-1.65059	4.60757e-05	0.00013916
AT3G53690		3.08712	1.83266e-14	1.79242e-13		AT4G30720		-1.65036	3.1151e-09	1.70582e-08
AT4G00250	STKL2	3.08538	4.98631e-08	2.34073e-07		AT4G32000		-1.65019	3.56507e-09	1.93961e-08
AT5G04465		3.08508	0.00215794	0.00478372		AT1G34245	EPF2	-1.64989	1.11515e-06	4.29286e-06
AT4G23610		3.0845	4.41465e-05	0.000133658		AT4G22212		-1.64981	0.0026417	0.00575713
AT3G17010		3.08276	8.89778e-05	0.000254456		AT5G13510	RPL10	-1.64953	8.72571e-09	4.54099e-08
AT1G20360		3.08117	0.00757513	0.0150077		AT1G44575	PSBS	-1.64869	8.31281e-12	6.35425e-11
AT5G27360	SFP2	3.0809	2.87484e-41	1.24246e-39		AT4G40090	AGP3	-1.64868	1.33998e-11	9.95701e-11
AT5G18910		3.07933	2.7295e-06	9.93876e-06		AT2G43050	PME16	-1.6485	0.000770157	0.00186081
AT1G71002	MIR858A	3.07724	0.00207943	0.00462916		AT3G49110	PER33	-1.64775	0.00547514	0.0111624
AT5G37420		3.07636	0.000163032	0.00044447		AT3G28880		-1.64767	0.00599789	0.0121324
AT4G28700	AMT1-4	3.07229	2.60564e-09	1.43831e-08		AT4G16008		-1.64755	5.35641e-08	2.50535e-07
AT1G61930		3.0718	7.95258e-18	1.02012e-16		AT3G44890	RPL9	-1.64749	9.44721e-10	5.52566e-09
AT1G52040	MBP1	3.06956	2.65957e-21	4.29347e-20		AT5G14260		-1.64718	1.98676e-11	1.44704e-10
AT3G18610	NUCL2	3.06716	1.36001e-32	3.99343e-31		AT5G57530	XTH12	-1.64638	5.01532e-24	9.39168e-23
AT1G09790	COBL6	3.06703	0.00197256	0.00441156		AT2G30170		-1.64633	5.68289e-08	2.64762e-07
AT2G45220	PME17	3.06534	5.80442e-33	1.7376e-31		AT1G09650		-1.64628	0.00667816	0.0133789
AT5G18270	ANAC087	3.06099	5.32482e-131	2.83672e-128		AT2G34170		-1.64446	8.47754e-07	3.32728e-06
AT4G23560	AtGH9B15	3.05778	0.000105226	0.000297063		AT2G15292		-1.64382	2.64677e-15	2.77252e-14
AT5G50800	SWEET13	3.05755	9.05042e-05	0.000258481		AT4G34580	SFH1	-1.64371	1.06052e-16	1.25551e-15
AT4G14368		3.05693	0.000189737	0.000511503		AT2G21960		-1.64279	2.77357e-08	1.35074e-07
AT5G65140	TPPJ	3.05565	4.53377e-18	5.91452e-17		AT1G61740		-1.64276	3.89721e-06	1.39188e-05
AT5G08380	AGAL1	3.05513	9.35196e-57	7.28727e-55		AT5G04230	PAL3	-1.64261	0.00157792	0.00359143
AT3G05635		3.05508	0.00880435	0.0172002		AT2G33180		-1.64217	1.84745e-14	1.80621e-13
AT2G22600		3.05464	2.81912e-16	3.22623e-15		AT4G09785		-1.64152	0.00866528	0.0169539
AT4G25160	PUB35	3.05004	1.26947e-40	5.3277e-39		AT4G40070	ATL32	-1.64144	5.04745e-07	2.04626e-06
AT1G71390	AtRLP11	3.04851	0.00837146	0.0164445		AT5G57170		-1.6412	5.93951e-21	9.39667e-20
AT5G26840		3.04851	0.00837146	0.0164445		AT5G40820	ATRAD3	-1.63986	1.39451e-05	4.58642e-05
AT1G49900		3.04799	8.56193e-12	6.5332e-11		AT5G10190		-1.63972	2.58695e-05	8.15184e-05
AT1G76500	AHL29	3.04783	7.47122e-28	1.73359e-26		AT5G21950		-1.63941	1.74805e-08	8.73155e-08
AT1G74110	CYP78A10	3.04668	0.00215803	0.00478372		AT2G39250	SNZ	-1.63919	0.000263165	0.000691181
AT1G15405		3.0436	2.35182e-15	2.47948e-14		AT1G27420		-1.63876	2.37583e-16	2.73692e-15
AT5G66580		3.04351	2.51638e-12	2.0131e-11		AT3G59060	PIF5	-1.63844	2.79124e-05	8.7428e-05
AT2G18530		3.04284	0.00482512	0.00994197		AT4G15545		-1.63826	2.40293e-08	1.17928e-07
AT3G08860	PYD4	3.04262	1.02413e-94	2.34509e-92		AT5G12235	CLE22	-1.63811	0.012143	0.0230197
AT5G26970		3.04207	0.00177705	0.00400416		AT3G26710	CCB1	-1.63712	3.37452e-14	3.22668e-13
AT5G55150		3.04185	4.61048e-08	2.17635e-07		AT3G08770	LTP6	-1.63662	7.01247e-09	3.69432e-08
AT1G67481	MIR839A	3.04133	0.00116052	0.00271672		AT3G04030	MYR2	-1.63638	0.000402072	0.00102178
AT3G26940	CDG1	3.03794	0.00860687	0.0168547		AT4G24090		-1.63629	2.01488e-23	3.67038e-22
AT4G17920	ATL29	3.03719	2.10788e-07	9.05001e-07		AT2G35420	ATL28	-1.63603	0.000531619	0.00132165
AT5G41830		3.03644	0.00257994	0.00562912		AT3G26650	GAPA1	-1.63577	3.93249e-07	1.62145e-06
AT1G14630		3.03428	2.72661e-15	2.85272e-14		AT1G29440	SAUR63	-1.63538	1.05667e-07	4.74429e-07
AT5G05260	CYP79A2	3.03358	0.00229524	0.00505868		AT5G66800		-1.63516	0.00106201	0.00250387
AT4G31020		3.02683	9.90528e-20	1.44775e-18		AT1G05570	CALS1	-1.63485	3.73877e-06	1.33786e-05
AT1G13750	PAP1	3.02661	2.49625e-190	3.42958e-187		AT1G73300	SCPL2	-1.63479	7.6054e-07	3.00259e-06
AT3G15518		3.02639	5.72867e-18	7.42509e-17		AT2G48075		-1.63406	0.00377549	0.00797069
AT5G66630	DAR5	3.02634	3.9757e-72	4.65389e-70		AT3G54770	ARP1	-1.63336	7.85035e-11	5.31721e-10
AT4G28460	PIP1	3.02506	2.27021e-05	7.22084e-05		AT2G21430	RD19B	-1.63332	0.000101178	0.000286553
AT3G06575		3.02423	0.00395713	0.00831297		AT3G59780		-1.6331	8.26057e-13	6.96267e-12
AT3G06900	U4.2	3.02369	0.00888041	0.0173282		AT5G30510	RPS1	-1.63295	1.26193e-13	1.15059e-12
AT1G66235		3.0232	0.0088897	0.0173397		AT5G49910	HSP70-7	-1.63281	3.45157e-13	3.02653e-12
AT2G25470	AtRLP21	3.02068	5.7594e-15	5.86134e-14		AT5G35480		-1.63194	0.00100545	0.00238017
AT1G65730	YSL7	3.0183	7.87337e-39	3.10933e-37		AT2G12190		-1.63183	8.74087e-06	2.96867e-05
AT4G39650	GGT2	3.01267	0.00229052	0.00505114		AT3G15110		-1.63085	6.66198e-13	5.67388e-12
AT2G39885	MIR393A	3.01014	0.00927855	0.0180133		AT2G41720	EMB2654	-1.63079	2.14652e-13	1.91893e-12
AT4G03805		3.01014	0.00927855	0.0180133		AT5G59930		-1.62982	7.99526e-05	0.000230872
AT2G31141		3.01009	7.66847e-27	1.69069e-25		AT3G01350	NPF5.9	-1.62946	1.56427e-09	8.88463e-09
AT3G05020	ACP1	3.00858	9.79284e-44	4.73393e-42		AT2G35210	AGD10	-1.62905	1.15322e-05	3.84907e-05
AT1G64405		3.00828	1.62968e-14	1.60049e-13		AT3G60720	PDLP8	-1.62821	4.76575e-08	2.24356e-07
AT1G19200	FLZ12	3.0079	6.22053e-35	2.01966e-33		AT3G15630		-1.62808	8.16128e-09	4.26681e-08
AT1G53950		3.00726	1.82881e-14	1.78933e-13		AT2G24790	COL3	-1.6275	3.29732e-12	2.6067e-11
AT3G01990	ACR6	3.00609	4.48871e-10	2.74153e-09		AT3G62040		-1.62686	7.27075e-09	3.82267e-08
AT1G72000	INVF	3.0042	0.000293167	0.000763299		AT3G17170	RFC3	-1.62608	1.05329e-14	1.05265e-13
AT4G23280	CRK20	3.00287	9.62754e-27	2.11369e-25		AT1G78020	FLZ6	-1.62605	1.04097e-05	3.49409e-05
AT2G43730	JAL24	3.00257	0.00943625	0.0182896		AT2G34000		-1.62542	0.00447834	0.00928609
AT2G23050	NPY4	3.00132	7.86947e-15	7.93451e-14		AT3G61950	BHLH67	-1.62468	2.17888e-05	6.95325e-05
AT3G23800	SBP3	2.99925	6.94476e-44	3.3822e-42		AT2G15970	COR413PM1	-1.6245	2.23486e-10	1.43022e-09
AT1G23000		2.99855	4.92903e-45	2.50325e-43		AT5G64280	DIT2-2	-1.6232	4.42114e-13	3.83292e-12
AT2G08100		2.99383	3.12364e-09	1.71014e-08		AT1G53870		-1.62274	0.0141549	0.0264231
AT4G23140	CRK6	2.99175	1.23481e-11	9.21487e-11		AT3G52550		-1.62167	1.02371e-05	3.44056e-05
AT5G56555		2.99092	0.000443756	0.00111813		AT2G17033		-1.62111	8.87781e-14	8.19761e-13
AT1G04973		2.99047	8.75647e-11	5.8899e-10		AT2G30790	PSBP2	-1.62045	0.00452497	0.00937013
AT4G22467		2.99001	0.00464271	0.00959416		AT1G37130	NIA2	-1.62031	7.29799e-08	3.35695e-07
AT5G54490	PBP1	2.98894	3.29764e-35	1.08927e-33		AT5G41700	UBC8	-1.62029	6.83487e-25	1.33947e-23
AT2G11405		2.98769	0.0102311	0.0196841		AT2G27930		-1.62009	0.000262726	0.000690098
AT5G64120	PER71	2.98657	3.37268e-66	3.39925e-64		AT1G53890		-1.61906	0.0171004	0.0312794
AT5G10090	TPR13	2.98163	0.000254329	0.000670539		AT4G33970	PEX4	-1.61748	1.82561e-10	1.17901e-09
AT3G22500	ECP31	2.98091	0.0106638	0.0204321		AT1G15890		-1.61683	0.0022805	0.00503086
AT4G24025		2.98082	0.00614078	0.0123965		AT3G24540		-1.61648	0.0139639	0.0260945
AT3G23090		2.97831	3.85623e-39	1.54628e-37		AT5G07580	ERF106	-1.61612	6.62389e-10	3.96038e-09
AT4G15350	CYP705A2	2.97813	7.49016e-10	4.44573e-09		AT2G41970		-1.61605	1.00593e-10	6.72097e-10
AT1G56555		2.97644	2.1663e-06	7.98603e-06		AT1G31050		-1.61555	4.26638e-10	2.61431e-09
AT5G24080		2.97618	0.00302089	0.00650798		AT4G01026	PYL7	-1.61475	1.49383e-06	5.64164e-06
AT3G21351		2.97446	4.90732e-62	4.38701e-60		AT2G37750		-1.61384	6.55428e-08	3.03356e-07
AT1G55865		2.97436	1.16368e-17	1.46961e-16		AT5G42310	CRP1	-1.61311	1.78115e-06	6.65549e-06
AT5G43040		2.97407	1.05637e-14	1.05491e-13		AT2G28105		-1.61303	0.000179351	0.000485611
AT3G13437		2.97402	3.84937e-78	5.77494e-76		AT5G25630		-1.61289	9.938e-12	7.52601e-11
AT3G10790		2.97356	0.0102327	0.0196842		AT2G23690		-1.6128	0.000693022	0.00168914
AT3G18180		2.97356	0.0102327	0.0196842		AT3G16650	PRL2	-1.61205	1.69154e-05	5.49135e-05
AT5G17980		2.97355	7.41639e-36	2.54065e-34		AT4G18670	LRX5	-1.61205	0.000195202	0.000525261
AT3G48344		2.97302	4.71577e-06	1.66645e-05		AT3G26085		-1.61137	6.09953e-07	2.44247e-06
AT4G23210	CRK13	2.97225	2.9086e-16	3.32281e-15		AT2G31890	RAP	-1.61092	7.32857e-16	8.04479e-15
AT1G66400	CML23	2.97221	3.88372e-23	6.98214e-22		AT1G50900	LTD	-1.61061	2.20302e-07	9.42595e-07
AT4G28790	BHLH23	2.9719	1.48692e-62	1.34307e-60		AT3G06990		-1.6106	0.00179722	0.00404323
AT4G29150	IQD25	2.97059	3.9764e-26	8.40486e-25		AT5G48110		-1.61044	8.18877e-09	4.27948e-08
AT1G76640	CML39	2.96793	0.00038003	0.000970391		AT4G24540	AGL24	-1.6101	2.32138e-08	1.14205e-07
AT1G75280		2.96691	3.5053e-37	1.27263e-35		AT1G06830	GRXS11	-1.60931	2.04517e-07	8.79381e-07
AT5G56700		2.96667	1.13391e-10	7.54512e-10		AT3G08685		-1.60922	0.0120252	0.0228093
AT2G42430	LBD16	2.96509	5.55078e-16	6.16323e-15		AT4G17090	BAM3	-1.60686	0.00265733	0.00578732
AT4G19430		2.96404	7.30624e-09	3.83901e-08		AT2G38500		-1.60656	0.00391332	0.00823086
AT4G23720		2.96278	3.24103e-09	1.77181e-08		AT4G19645		-1.6063	1.28423e-10	8.4613e-10
AT1G01530	AGL28	2.95975	0.0105526	0.0202443		AT2G23610	MES3	-1.60622	0.000883486	0.00211099
AT4G24150	GRF8	2.95891	6.46509e-13	5.51879e-12		AT1G70450		-1.60622	0.013076	0.0245777
AT5G01670		2.95881	2.01141e-22	3.48875e-21		AT1G45163		-1.60617	2.67238e-09	1.47359e-08
AT1G21340	DOF1.2	2.95735	0.00468759	0.00967924		AT3G12345		-1.60583	1.01733e-11	7.69078e-11
AT1G52110		2.95724	0.00377257	0.00796693		AT2G33450	RPL28	-1.60581	1.19035e-08	6.08082e-08
AT1G06350		2.95718	1.60341e-37	5.94538e-36		AT5G17870	PSRP6	-1.60474	1.09045e-21	1.80159e-20
AT1G65240		2.95646	5.86934e-20	8.73507e-19		AT1G16080		-1.60367	3.08852e-19	4.34155e-18
AT4G05018		2.9559	0.00278227	0.00604078		AT1G74970	RPS9	-1.60352	9.05589e-09	4.70531e-08
AT1G72210	BHLH96	2.9553	6.64404e-32	1.89963e-30		AT5G35926		-1.60339	4.70068e-08	2.21535e-07
AT2G36780	UGT73C3	2.95186	3.47069e-29	8.65319e-28		AT3G12710		-1.60249	0.000214414	0.000572999
AT1G21313		2.95141	1.466e-11	1.08195e-10		AT4G20760		-1.60229	4.37015e-19	6.06155e-18
AT5G66150		2.94963	0.00309123	0.00664145		AT1G78990		-1.60107	9.45854e-08	4.27542e-07
AT5G25490		2.94746	6.87793e-28	1.59735e-26		AT1G03130	PSAD2	-1.60022	2.44638e-05	7.73688e-05
AT2G21640		2.94641	7.14226e-25	1.39761e-23		AT4G38950	KIN7F	-1.59998	1.88712e-17	2.35137e-16
AT4G17160	RABB1A	2.94376	0.00287644	0.00622661		AT3G54090	FLN1	-1.59953	4.37436e-11	3.04909e-10
AT2G20515		2.94354	1.90308e-25	3.84803e-24		ATCG00120	ATPA	-1.59925	0.000244424	0.000646776
AT1G72460		2.9426	0.00507543	0.0104207		AT3G54210	RPL17	-1.59815	3.97513e-11	2.78793e-10
AT4G38210	EXPA20	2.94047	5.51376e-42	2.49016e-40		AT1G80650	RTL1	-1.59712	9.23045e-09	4.79315e-08
AT2G16595		2.93844	1.08614e-20	1.69572e-19		AT2G22360	DJA6	-1.59688	7.11003e-15	7.19381e-14
AT1G17430		2.93696	1.2707e-26	2.77576e-25		AT2G29360	SDR	-1.59687	9.33588e-06	3.15842e-05
AT1G45616	AtRLP6	2.93652	2.21824e-09	1.23228e-08		AT3G54880		-1.59674	4.15055e-08	1.97387e-07
AT4G12090		2.9343	9.44416e-76	1.27736e-73		AT1G15002		-1.59671	5.58578e-05	0.000166224
AT2G47260	WRKY23	2.93363	1.93577e-20	2.97418e-19		AT4G31470		-1.59601	0.00142709	0.00327757
AT5G10130	DFC	2.93182	6.17507e-08	2.86508e-07		AT5G47190		-1.59531	9.28468e-12	7.05582e-11
AT2G16450		2.93057	0.00452415	0.00936917		AT3G04790	RPI3	-1.59508	8.50888e-09	4.43345e-08
AT2G04515		2.92843	0.00314357	0.00674334		AT5G03570	IREG2	-1.59482	2.64133e-09	1.45678e-08
AT2G19890		2.92706	0.000292141	0.000761084		AT2G06520	PSBX	-1.59406	5.929e-08	2.75785e-07
AT5G50610		2.92695	3.50541e-07	1.45779e-06		AT4G37700		-1.59393	1.30512e-05	4.31253e-05
AT5G52570	BETA-OHASE 2	2.92656	1.20129e-14	1.19279e-13		AT4G22160		-1.59313	8.00691e-05	0.000231183
AT4G09030	AGP10	2.92367	2.31532e-93	4.99498e-91		AT5G51790		-1.59226	0.000243617	0.000644837
AT5G54075	U3D	2.92266	4.03533e-31	1.10186e-29		AT2G39140	SVR1	-1.59192	2.11664e-11	1.53566e-10
AT1G01310		2.92106	0.000146157	0.000401905		AT5G11420		-1.59186	3.04273e-07	1.27635e-06
AT2G06835		2.91966	2.5018e-06	9.1569e-06		AT4G17560		-1.59184	1.44592e-12	1.18321e-11
AT1G59950		2.91697	0.000351172	0.000901109		AT4G12400	HOP3	-1.59143	1.72695e-20	2.66118e-19
AT3G54150		2.91541	6.11997e-29	1.50571e-27		AT3G51540		-1.59037	0.00522804	0.0107079
AT1G59790		2.91277	0.00038266	0.000976248		AT2G02710	TLP1	-1.58977	9.06948e-13	7.59787e-12
AT3G27473		2.91256	3.18186e-11	2.25889e-10		AT5G02710		-1.58928	1.73744e-15	1.85498e-14
AT4G31000	CBP60F	2.91097	7.74428e-48	4.31038e-46		AT2G33850		-1.58871	4.66706e-07	1.90328e-06
AT1G23140	CAR8	2.90811	5.16923e-28	1.20912e-26		AT5G51890	PER66	-1.58868	5.37153e-06	1.88213e-05
AT4G07960	CSLC12	2.90773	2.55008e-64	2.43837e-62		AT3G01310		-1.5876	9.2514e-09	4.80307e-08
AT2G41480	PER25	2.90669	1.08015e-16	1.27758e-15		AT4G27700		-1.5872	1.03747e-09	6.03302e-09
AT1G65610	KOR2	2.90493	4.51546e-42	2.04283e-40		AT1G11600	CYP77B1	-1.58719	0.00502959	0.0103323
AT5G49520	WRKY48	2.90361	6.118e-25	1.20078e-23		AT1G30380	PSAK	-1.58687	5.33533e-09	2.85396e-08
AT5G14280	GPL2	2.90304	7.71893e-22	1.28669e-20		AT5G25980	TGG2	-1.58606	0.00411327	0.00860636
AT2G32210		2.90222	1.72523e-12	1.40167e-11		AT3G62030	ROC4	-1.58522	1.08226e-13	9.93366e-13
AT3G49580	LSU1	2.90015	4.16159e-11	2.90776e-10		AT2G38140	RPS31	-1.58516	1.94711e-07	8.40401e-07
AT4G10950		2.89948	0.000652714	0.00159844		AT3G09760		-1.58488	1.69489e-10	1.09976e-09
AT3G24220	NCED6	2.89909	0.0124869	0.0235979		AT1G58340	DTX48	-1.58451	0.00531817	0.0108772
AT5G46640	AHL8	2.89875	6.1834e-24	1.15459e-22		AT5G24100		-1.58339	1.40965e-06	5.34926e-06
AT3G16980	NRPB9A	2.89754	4.07682e-09	2.20425e-08		AT3G50640		-1.58285	9.81931e-07	3.81547e-06
AT2G47230	DUF6	2.89747	7.27215e-47	3.92215e-45		AT5G05740	EGY2	-1.58228	1.7873e-07	7.76041e-07
AT2G34210		2.89552	4.4433e-10	2.71698e-09		AT5G17165		-1.58187	0.0128488	0.0241943
AT4G27654		2.89306	8.14455e-06	2.77553e-05		AT2G30766		-1.58152	1.2223e-05	4.06613e-05
[truncated: 2,830 more rows]
