# Supplementary material for: A FUS3-VAL transcriptional negative feedback circuit terminates seed maturation program and safeguards vegetative development
Source: Research Square preprint supplement (doi:10.21203/rs.3.rs-7986565/v1), 2025-11-12
Supplement: Supplementary file 2 [file 064c451ab801845e0bc87855.xlsx]

## Sheet: DEG of FUS3-GR-FLAG DEX vs DMSO
up							down
ID	name	log2Folc Change	p vaule	FDR			ID	name	log2Folc Change	p vaule	FDR
AT4G27160	AT2S3	13.4133	0	0			AT1G01030	NGA3	-1.2076	2.24e-05	5.8e-05
AT1G03880	CRB	13.2595	7.37e-213	3.74e-211			AT1G01080	AT1G01080	-1.30416	8.74e-100	1.76e-98
AT4G27150	AT2S2	12.6694	4.45e-237	2.7e-235			AT1G01200	RABA3	-1.12378	0.000518395	0.00115379
AT5G44120	CRA1	11.8244	0	0			AT1G01320	AT1G01320	-1.94485	1.95e-282	1.56e-280
AT4G28520	CRC	11.5808	6.76e-302	6.16e-300			AT1G01380	ETC1	-1.33026	0.00467667	0.00909416
AT5G07550	GRP19	10.9847	2.58e-284	2.14e-282			AT1G01390	UGT72B2	-1.81658	1.03e-13	4.45e-13
AT2G34870	MEE26	10.9422	2.5e-125	6.42e-124			AT1G01470	LEA14	-1.62232	2.13e-73	3.12e-72
AT2G34700	AT2G34700	10.4087	0	0			AT1G01610	GPAT4	-1.35538	1.01e-59	1.24e-58
AT1G47540	ATTI7	10.2998	2.07e-148	6.56e-147			AT1G01790	KEA1	-1.80336	1.94e-176	7.71e-175
AT3G21370	BGLU19	10.2263	0	0			AT1G01900	SBTI1.1	-1.34275	2.91e-20	1.59e-19
AT4G31970	CYP82C2	9.99636	6.55e-98	1.28e-96			AT1G01970	AT1G01970	-1.60226	6.94e-59	8.36e-58
AT5G52160	AT5G52160	9.97409	4.35e-97	8.4e-96			AT1G02065	SPL8	-2.57157	4.4e-12	1.77e-11
AT1G28650	AT1G28650	9.91173	1.31e-95	2.5e-94			AT1G02150	AT1G02150	-1.22113	3e-76	4.56e-75
AT4G25140	OLEO1	9.84913	0	0			AT1G02205	CER1	-2.90397	6.39e-86	1.09e-84
AT4G36700	AT4G36700	9.63661	0	0			AT1G02280	TOC33	-1.18608	2.91e-79	4.61e-78
AT5G07530	GRP17	9.58491	2.73e-178	1.1e-176			AT1G02610	AT1G02610	-1.51139	1.76e-23	1.06e-22
AT4G27170	AT2S4	9.57573	0	0			AT1G02620	AT1G02620	-1.82252	0.00974091	0.0179802
AT3G11480	BSMT1	9.36985	6.95e-82	1.14e-80			AT1G02730	CSLD5	-1.10779	1.79e-42	1.64e-41
AT5G50360	AT5G50360	9.34644	2.15e-81	3.5e-80			AT1G02800	CEL2	-4.17916	5.17e-14	2.26e-13
AT1G72570	AIL1	9.25631	2.48e-79	3.94e-78			AT1G02820	AT1G02820	-1.76603	9.38e-05	0.000228052
AT3G44460	DPBF2	9.19999	5.39e-78	8.43e-77			AT1G02910	LPA1	-1.10873	7.69e-40	6.72e-39
AT2G05580	AT2G05580	9.1532	0	0			AT1G02950	GSTF4	-1.40489	2.51e-14	1.11e-13
AT1G03890	CRD	9.00884	1.62e-73	2.38e-72			AT1G03020	GRXS1	-1.59667	3.12e-06	8.69e-06
AT3G22640	PAP85	8.88581	0	0			AT1G03055	D27	-2.89473	2.89e-16	1.38e-15
AT1G78500	PEN6	8.83692	2.41e-100	4.86e-99			AT1G03130	PSAD2	-1.53329	0	0
AT1G11370	PME56	8.5612	3.2e-78	5.03e-77			AT1G03160	FZL	-1.0359	2.34e-69	3.26e-68
AT3G58740	CSY1	8.55718	5.4e-64	7.01e-63			AT1G03600	PSB27-1	-1.33636	5.87e-162	2.1e-160
AT5G03820	AT5G03820	8.54758	1.04e-63	1.34e-62			AT1G03630	PORC	-1.62448	6.51e-241	4.02e-239
AT2G23510	SDT	8.47791	8.71e-118	2.08e-116			AT1G03680	ATHM1	-1.56903	1.82e-183	7.67e-182
AT3G63040	AT3G63040	8.30076	6.85e-59	8.26e-58			AT1G03700	AT1G03700	-1.25451	0.00563072	0.0107985
AT5G38160	AT5G38160	8.26126	4.24e-58	5.04e-57			AT1G03870	FLA9	-1.03454	1.71e-96	3.27e-95
AT1G53690	NRPB12L	8.2378	1.09e-57	1.28e-56			AT1G04110	SBT1.2	-1.54642	2.98e-15	1.37e-14
AT5G05290	EXPA2	8.14933	3.12e-81	5.07e-80			AT1G04240	IAA3	-1.21648	1.61e-20	8.86e-20
AT4G03050	AOP3	8.08877	1.41e-40	1.26e-39			AT1G04420	AT1G04420	-1.24674	1.36e-90	2.45e-89
AT3G54940	AT3G54940	8.06074	0	0			AT1G04640	LIP2	-1.48751	1.56e-90	2.81e-89
AT5G62800	AT5G62800	8.04876	3.9e-54	4.35e-53			AT1G04940	TIC20-I	-1.04213	1.17e-67	1.6e-66
AT5G40420	OLEO2	8.01929	0	0			AT1G05040	AT1G05040	-1.54274	0.0256538	0.0438727
AT3G60120	BGLU27	7.80674	1.73e-72	2.51e-71			AT1G05140	ARASP2	-1.0898	5.02e-51	5.34e-50
AT3G48270	CYP71A26	7.77062	4.98e-66	6.66e-65			AT1G05190	RPL6	-1.73123	0	0
AT5G39110	GLP6	7.63366	0	0			AT1G05310	PME8	-1.22216	3.06e-11	1.18e-10
AT5G59310	LTP4	7.60722	0	0			AT1G05385	PSB27-2	-1.24788	1.48e-22	8.68e-22
AT4G34520	FAE1	7.55777	1.57e-45	1.53e-44			AT1G05530	UGT75B2	-1.34349	0.00148205	0.00309983
AT1G54860	AT1G54860	7.50053	2.06e-44	1.98e-43			AT1G05540	AT1G05540	-2.6903	1.8e-09	6.32e-09
AT5G07540	GRP16	7.4304	1.79e-43	1.69e-42			AT1G05690	BT3	-1.43412	9.47e-06	2.53e-05
AT2G28490	AT2G28490	7.4208	0	0			AT1G05700	AT1G05700	-3.14175	5.14e-48	5.22e-47
AT1G30795	AT1G30795	7.3806	1.07e-42	9.88e-42			AT1G06030	AT1G06030	-2.92835	3.43e-05	8.72e-05
AT1G71250	AT1G71250	7.37425	5.72e-82	9.37e-81			AT1G06100	AT1G06100	-3.8843	1.4e-10	5.21e-10
AT1G70960	AT1G70960	7.35518	2.75e-42	2.52e-41			AT1G06120	AT1G06120	-1.77994	0.000205277	0.000479819
AT5G39150	AT5G39150	7.35219	0	0			AT1G06190	RHON1	-1.40146	3.23e-150	1.04e-148
AT4G26740	PXG1	7.31882	1.06e-183	4.48e-182			AT1G06265	AT1G06265	-1.08485	8.93e-13	3.7e-12
AT1G04660	AT1G04660	7.27837	9.37e-143	2.83e-141			AT1G06360	AT1G06360	-3.32535	5.08e-20	2.75e-19
AT5G45690	AT5G45690	7.26792	1.1e-64	1.44e-63			AT1G06460	ACD32.1	-1.23847	3.04e-167	1.14e-165
AT3G29385	AT3G29385	7.10317	1.44e-59	1.76e-58			AT1G06645	AT1G06645	-1.05661	3.93e-14	1.73e-13
AT2G29470	GSTU3	7.10022	0	0			AT1G06680	PSBP1	-1.25005	5.1e-250	3.34e-248
AT1G48990	AT1G48990	7.05809	2.12e-55	2.41e-54			AT1G06690	AT1G06690	-1.06	1e-40	8.94e-40
AT1G75830	PDF1.1	7.03122	1.53e-228	8.68e-227			AT1G06830	GRXS11	-2.73646	1.52e-39	1.32e-38
AT1G17810	TIP3-2	7.01947	2.2e-106	4.72e-105			AT1G06980	AT1G06980	-1.26118	0.00504446	0.00975346
AT4G29640	CDA5	7.00872	1.62e-58	1.94e-57			AT1G07050	AT1G07050	-5.57142	0	0
AT5G04380	AT5G04380	6.94699	1.89e-86	3.25e-85			AT1G07180	NDA1	-1.57613	2.12e-30	1.53e-29
AT5G50260	CEP1	6.94298	0	0			AT1G07320	RPL4	-1.4738	1.94e-275	1.48e-273
AT3G21380	JAL36	6.92845	9.78e-229	5.55e-227			AT1G07330	AT1G07330	-1.67617	0.0164628	0.0291819
AT4G21370	PSEUDOSRKA	6.92153	5.31e-36	4.31e-35			AT1G07450	AT1G07450	-1.37116	1.33e-07	4.13e-07
AT1G73190	TIP3-1	6.91569	0	0			AT1G07490	RTFL3	-1.52155	2.87e-05	7.34e-05
AT4G10020	HSD5	6.91007	6.38e-235	3.79e-233			AT1G07550	AT1G07550	-5.54518	4.18e-20	2.27e-19
AT1G74140	AT1G74140	6.82138	1.57e-34	1.23e-33			AT1G07560	AT1G07560	-2.67784	4.12e-31	3.02e-30
AT4G16160	OEP162	6.79685	9.99e-50	1.04e-48			AT1G07610	MT1C	-1.70706	4.13e-91	7.52e-90
AT5G55410	AT5G55410	6.75753	3.67e-56	4.23e-55			AT1G08090	NRT2.1	-2.52429	2.98e-13	1.26e-12
AT5G39120	AT5G39120	6.74871	8.21e-117	1.93e-115			AT1G08280	AT1G08280	-1.14712	1.03e-17	5.17e-17
AT1G57800	ORTH3	6.70753	6e-126	1.55e-124			AT1G08380	PSAO	-1.55751	3.87e-166	1.43e-164
AT1G25410	IPT6	6.69482	7.92e-33	6e-32			AT1G08520	CHLD	-1.36211	1.39e-157	4.78e-156
AT5G24560	PP2B12	6.64483	4.34e-32	3.24e-31			AT1G08540	SIGB	-1.61539	9.94e-162	3.54e-160
AT1G15520	ABCG40	6.64336	0	0			AT1G08550	VDE1	-1.91436	1e-225	5.59e-224
AT5G39180	AT5G39180	6.63052	2.09e-40	1.84e-39			AT1G08840	emb2411	-1.01772	7.93e-14	3.44e-13
AT3G57510	ADPG1	6.56159	2.69e-59	3.26e-58			AT1G08900	SUGTL3	-1.54172	9.48e-47	9.42e-46
AT5G36970	NHL25	6.53685	1.68e-47	1.7e-46			AT1G08980	AMI1	-1.1579	4.25e-83	7.04e-82
AT3G52780	PAP20	6.51322	4.95e-307	4.68e-305			AT1G08990	GUX5	-1.07008	1.77e-10	6.57e-10
AT4G04990	AT4G04990	6.50689	2.36e-77	3.65e-76			AT1G09170	AT1G09170	-1.25704	1.62e-08	5.37e-08
AT1G19250	FMO1	6.45458	0	0			AT1G09240	NAS3	-1.71835	1.28e-79	2.03e-78
AT5G39190	GLP5A	6.4062	0	0			AT1G09340	CSP41B	-2.13821	0	0
AT5G25180	CYP71B14	6.37795	2.97e-42	2.72e-41			AT1G09350	GOLS3	-2.95975	1.69e-09	5.95e-09
AT1G10550	XTH33	6.34971	0	0			AT1G09750	AT1G09750	-1.6984	7.45e-26	4.8e-25
AT5G39160	GLP2A	6.32786	0	0			AT1G09850	XBCP3	-1.81672	2.13e-93	3.96e-92
AT2G06985	AT2G06985	6.30383	5.31e-28	3.59e-27			AT1G09860	PUP16	-2.11585	0.00295832	0.00592862
AT2G24210	TPS10	6.28053	1.57e-27	1.05e-26			AT1G09900	AT1G09900	-1.24033	1.9e-40	1.68e-39
AT4G02780	GA1	6.26317	1.88e-214	9.63e-213			AT1G10360	GSTU18	-1.99665	1.57e-100	3.19e-99
AT4G21020	AT4G21020	6.25799	4.35e-84	7.31e-83			AT1G10470	ARR4	-1.35894	1.84e-82	3.03e-81
AT4G03038	AT4G03038	6.25596	8.76e-53	9.6e-52			AT1G10522	AT1G10522	-1.68033	3.83e-97	7.41e-96
AT5G03795	AT5G03795	6.22546	0	0			AT1G10640	AT1G10640	-1.57789	3.56e-55	4.04e-54
AT3G60140	BGLU30	6.19638	0	0			AT1G10657	AT1G10657	-2.34981	1.86e-42	1.71e-41
AT1G19210	ERF017	6.18392	8.91e-48	9.01e-47			AT1G10760	GWD1	-1.18485	1.56e-140	4.62e-139
AT5G36910	THI2.2	6.18325	0	0			AT1G10790	AT1G10790	-1.19322	0.0181027	0.0318698
AT5G07500	PEI1	6.16362	1.71e-170	6.53e-169			AT1G10830	Z-ISO	-1.04957	3.52e-43	3.29e-42
AT5G50600	HSD1	6.16023	1.29e-191	5.71e-190			AT1G10930	RECQL4A	-1.30959	1.05e-51	1.13e-50
AT5G22520	AT5G22520	6.14479	1.05e-89	1.86e-88			AT1G10960	FD1	-1.12989	3.09e-109	6.88e-108
AT1G33950	AT1G33950	6.14377	3.33e-26	2.16e-25			AT1G10980	AT1G10980	-1.58181	0.00357823	0.00708213
AT5G09640	SCPL19	6.13101	2.15e-61	2.69e-60			AT1G11070	AT1G11070	-1.52429	0.00193557	0.00397875
AT5G56510	APUM12	6.06397	7.38e-127	1.92e-125			AT1G11080	SCPL31	-1.15196	1.67e-15	7.74e-15
AT5G50700	HSD1	6.05288	1.83e-152	6.02e-151			AT1G11150	AT1G11150	-1.30387	3.15e-07	9.52e-07
AT1G22100	AT1G22100	5.99921	1.36e-24	8.46e-24			AT1G11160	AT1G11160	-1.09128	2.9e-10	1.06e-09
AT2G18540	AT2G18540	5.94311	3.37e-37	2.79e-36			AT1G11180	SCAMP5	-1.03078	1.6e-17	7.99e-17
AT1G56100	AT1G56100	5.9288	7.31e-24	4.46e-23			AT1G11210	AT1G11210	-1.46924	4.58e-47	4.56e-46
AT2G40220	ABI4	5.89969	1.85e-23	1.12e-22			AT1G11260	STP1	-1.13888	1.11e-68	1.53e-67
AT5G46950	AT5G46950	5.88902	2.42e-23	1.46e-22			AT1G11380	AT1G11380	-1.05828	2.98e-22	1.74e-21
AT1G73220	2025-10-01	5.88709	3.92e-165	1.43e-163			AT1G11410	AT1G11410	-1.73276	5.94e-38	5e-37
AT5G46960	AT5G46960	5.88281	1.55e-99	3.11e-98			AT1G11430	MORF9	-1.19226	5.75e-120	1.41e-118
AT5G51210	OL3	5.83971	1.56e-40	1.38e-39			AT1G11440	AT1G11440	-1.45948	1.11e-25	7.1e-25
AT1G05510	AT1G05510	5.83934	2.93e-90	5.25e-89			AT1G11490	AT1G11490	-1.72109	0.00697839	0.0131669
AT3G02840	AT3G02840	5.82217	2e-296	1.78e-294			AT1G11545	XTH8	-1.27462	1.63e-43	1.53e-42
AT3G55970	ATJRG21	5.80582	0	0			AT1G11560	OST3A	-1.81852	0.00985558	0.0181721
AT4G19730	AT4G19730	5.78436	2.3e-22	1.34e-21			AT1G11600	CYP77B1	-2.53391	2.56e-33	1.96e-32
AT1G63070	AT1G63070	5.77722	3.06e-22	1.78e-21			AT1G11655	AT1G11655	-2.69796	1.67e-06	4.75e-06
AT1G73120	AT1G73120	5.76684	0	0			AT1G11820	AT1G11820	-1.07372	1.99e-46	1.97e-45
AT1G68510	LBD42	5.76086	4.47e-22	2.59e-21			AT1G11850	AT1G11850	-2.41941	6.57e-38	5.53e-37
AT5G13170	SWEET15	5.74816	0	0			AT1G11860	GDCST	-1.69828	0	0
AT5G10140	FLC	5.66303	8.25e-178	3.31e-176			AT1G11915	AT1G11915	-1.27088	0.000561967	0.00124495
AT2G15780	AT2G15780	5.656	4.48e-21	2.51e-20			AT1G11990	AT1G11990	-2.96771	2.6e-05	6.69e-05
AT1G14520	MIOX1	5.65483	0	0			AT1G12010	AT1G12010	-1.25918	3.94e-40	3.46e-39
AT1G71470	AT1G71470	5.64355	1.21e-20	6.67e-20			AT1G12020	AT1G12020	-1.66605	1.09e-32	8.24e-32
AT1G67100	LBD40	5.62352	0	0			AT1G12040	LRX1	-1.05166	1.23e-28	8.46e-28
AT2G38240	AT2G38240	5.61343	0	0			AT1G12080	AT1G12080	-1.76249	7.33e-62	9.21e-61
AT4G11170	AT4G11170	5.61319	8.72e-144	2.67e-142			AT1G12240	BFRUCT4	-1.46058	1.71e-133	4.75e-132
AT5G14180	LIP2	5.59557	0	0			AT1G12330	AT1G12330	-1.00254	2.4e-14	1.07e-13
AT4G16820	PLA-I{beta]2	5.5879	5.25e-42	4.79e-41			AT1G12340	AT1G12340	-2.23478	0.00172458	0.0035759
AT2G22942	AT2G22942	5.56465	2.82e-20	1.54e-19			AT1G12480	SLAC1	-1.75632	3.76e-20	2.04e-19
AT1G26390	AT1G26390	5.55338	1.82e-128	4.81e-127			AT1G12570	AT1G12570	-1.99669	0.00451841	0.00881271
AT5G26120	ASD2	5.53022	4.78e-87	8.28e-86			AT1G12630	ERF027	-1.7373	0.0124434	0.022574
AT1G48130	PER1	5.50264	3.35e-224	1.85e-222			AT1G12770	RH47	-1.25768	5.11e-64	6.63e-63
AT1G11040	AT1G11040	5.49458	1.64e-19	8.74e-19			AT1G12800	AT1G12800	-1.69025	2.85e-223	1.56e-221
AT5G17810	WOX12	5.47913	1.98e-288	1.69e-286			AT1G12860	SCRM2	-1.59482	5.26e-86	8.99e-85
AT4G14368	AT4G14368	5.47247	2.03e-27	1.35e-26			AT1G12900	GAPA2	-1.33505	2.27e-281	1.8e-279
AT1G21970	NFYB9	5.46972	2.15e-19	1.14e-18			AT1G13100	CYP71B29	-1.3322	1.41e-15	6.55e-15
AT5G11320	YUC4	5.46372	1.96e-251	1.31e-249			AT1G13130	AT1G13130	-1.06283	0.0058231	0.0111364
AT2G14610	PR1	5.46366	0	0			AT1G13250	GATL3	-1.05949	1.88e-28	1.28e-27
AT5G57510	AT5G57510	5.38363	4.11e-88	7.19e-87			AT1G13270	MAP1B	-1.3166	1.06e-105	2.25e-104
AT4G12960	GILT	5.37753	1.51e-18	7.8e-18			AT1G13610	AT1G13610	-1.70144	0.000113694	0.000273944
AT3G56700	FAR6	5.37377	5.98e-21	3.34e-20			AT1G13650	AT1G13650	-4.37604	6e-66	8e-65
AT1G66360	AT1G66360	5.37108	3.13e-66	4.2e-65			AT1G13700	PGL1	-1.25582	7.5e-18	3.79e-17
AT4G31830	AT4G31830	5.36896	1.04e-33	8.01e-33			AT1G13790	FDM4	-1.15942	5.07e-12	2.03e-11
AT1G18100	MFT	5.36762	0	0			AT1G13820	AT1G13820	-1.01418	1.46e-34	1.15e-33
AT1G80133	EPFL8	5.34282	2.95e-18	1.51e-17			AT1G13930	AT1G13930	-1.83697	0	0
AT3G56350	MSD2	5.337	8.49e-80	1.35e-78			AT1G14030	LSMT-L	-2.03578	1.95e-160	6.83e-159
AT3G05150	AT3G05150	5.33601	0	0			AT1G14100	FUT8	-2.1041	0.00227503	0.00463043
AT2G44800	AT2G44800	5.33527	2.31e-41	2.08e-40			AT1G14150	PNSL2	-2.73219	3.88e-306	3.62e-304
AT2G30750	CYP71A12	5.325	0	0			AT1G14185	AT1G14185	-1.54081	6.22e-05	0.000153993
AT3G12203	SCPL17	5.31569	2.15e-17	1.07e-16			AT1G14205	AT1G14205	-1.33735	9.42e-10	3.36e-09
AT1G65385	AT1G65385	5.31169	9.71e-36	7.82e-35			AT1G14250	APY5	-2.16174	2.9e-107	6.28e-106
AT5G24860	FPF1	5.30147	4.52e-43	4.21e-42			AT1G14270	AT1G14270	-1.04739	3.43e-46	3.38e-45
AT2G27240	ALMT7	5.28902	9.09e-18	4.57e-17			AT1G14280	PKS2	-1.63501	1.07e-44	1.03e-43
AT1G12064	AT1G12064	5.27904	1.21e-88	2.12e-87			AT1G14345	AT1G14345	-2.1382	4.88e-204	2.31e-202
AT3G27810	MYB21	5.27649	9.09e-25	5.69e-24			AT1G14880	PCR1	-1.29408	0.00374739	0.00740097
AT3G04170	AT3G04170	5.2667	1.16e-17	5.81e-17			AT1G14960	AT1G14960	-1.27576	1.14e-20	6.29e-20
AT5G42600	MRN1	5.2602	0	0			AT1G15000	SCPL50	-1.02921	2.08e-14	9.25e-14
AT5G22490	AT5G22490	5.24588	1.73e-72	2.51e-71			AT1G15140	AT1G15140	-1.3795	1.03e-104	2.16e-103
AT3G12230	SCPL14	5.23083	4.42e-19	2.32e-18			AT1G15260	AT1G15260	-2.17045	1.6e-46	1.58e-45
AT1G58260	CYP79C2	5.20801	4.04e-22	2.34e-21			AT1G15360	WIN1	-2.01645	0.00452331	0.00882018
AT1G76470	AT1G76470	5.20107	1.04e-70	1.47e-69			AT1G15380	AT1G15380	-1.05477	4e-14	1.76e-13
AT2G26400	ARD1	5.19541	2.26e-199	1.04e-197			AT1G15510	PCMP-H73	-1.33002	1.96e-35	1.57e-34
AT4G29650	CDA4	5.14295	7.71e-31	5.61e-30			AT1G15550	GA3OX1	-2.92601	1.87e-46	1.85e-45
AT5G26805	AT5G26805	5.12791	1.65e-16	7.95e-16			AT1G15980	PNSB1	-1.66039	1.21e-219	6.47e-218
AT1G49570	PER10	5.10414	0	0			AT1G16060	ADAP	-1.13365	1.21e-15	5.64e-15
AT4G03450	AT4G03450	5.10331	3.4e-166	1.26e-164			AT1G16080	AT1G16080	-1.2694	2.22e-105	4.69e-104
AT5G04500	AT5G04500	5.08949	4.89e-24	3e-23			AT1G16310	MTP10	-1.27279	2.14e-13	9.13e-13
AT2G25770	AT2G25770	5.05966	4.46e-22	2.58e-21			AT1G16320	AT1G16320	-1.2785	9.74e-57	1.13e-55
AT3G55100	ABCG17	5.04992	7.4e-16	3.48e-15			AT1G16410	CYP79F1	-1.22756	2.64e-168	9.93e-167
AT3G23250	MYB15	5.04632	0	0			AT1G16440	RHS3	-1.03136	0.000417719	0.000939678
AT1G29680	AT1G29680	5.02974	3.15e-36	2.57e-35			AT1G16445	AT1G16445	-1.81537	3.61e-11	1.39e-10
AT5G44220	AT5G44220	5.01873	1.23e-15	5.76e-15			AT1G16630	AT1G16630	-1.08346	1.02e-15	4.78e-15
AT3G42820	AT3G42820	4.99977	2.62e-22	1.53e-21			AT1G16880	ACR11	-1.83999	0	0
AT3G28153	AT3G28153	4.99888	5.11e-287	4.32e-285			AT1G16960	AT1G16960	-1.32741	1.41e-13	6.06e-13
AT5G06760	LEA4-5	4.99401	1.73e-87	3.01e-86			AT1G17050	SPS2	-1.00662	5e-30	3.56e-29
AT2G23270	AT2G23270	4.99254	1.85e-21	1.05e-20			AT1G17140	ICR1	-1.48339	1.04e-66	1.4e-65
AT5G07200	GA20OX3	4.99228	1.78e-131	4.85e-130			AT1G17220	FUG1	-1.53702	1.27e-207	6.14e-206
AT5G44440	AT5G44440	4.97208	8.04e-31	5.84e-30			AT1G17700	PRA1F1	-1.08623	3.64e-05	9.23e-05
AT5G17125	AT5G17125	4.96597	4.54e-31	3.32e-30			AT1G17850	STR8	-1.31464	3.33e-64	4.34e-63
AT1G73175	AT1G73175	4.94965	1.08e-25	6.95e-25			AT1G17950	ATMYB52	-1.08911	0.00488563	0.00947223
AT1G27040	NPF4.5	4.93316	3.08e-90	5.52e-89			AT1G17960	AT1G17960	-1.70477	2.81e-08	9.14e-08
AT1G32970	AT1G32970	4.92552	6.63e-139	1.93e-137			AT1G18000	AT1G18000	-1.21659	1.43e-29	1.01e-28
AT3G27415	AT3G27415	4.92412	1.14e-36	9.39e-36			AT1G18010	AT1G18010	-1.251	6.38e-33	4.84e-32
AT4G18920	AT4G18920	4.89104	1.07e-14	4.79e-14			AT1G18090	AT1G18090	-1.75433	3.05e-31	2.24e-30
AT5G27370	AT5G27370	4.88952	1.15e-14	5.17e-14			AT1G18170	FKBP17-2	-1.27092	1.21e-40	1.07e-39
AT1G68250	AT1G68250	4.88899	4.39e-123	1.11e-121			AT1G18265	AT1G18265	-1.51594	5.43e-13	2.28e-12
AT1G32350	AOX3	4.8734	0	0			AT1G18330	RVE7	-1.06153	1.28e-29	9.04e-29
AT2G33070	NSP2	4.85435	3.84e-46	3.77e-45			AT1G18485	PCMP-H8	-1.41213	6.31e-42	5.74e-41
AT3G30580	AT3G30580	4.83731	3.65e-14	1.61e-13			AT1G18730	PNSB4	-1.5148	5.01e-74	7.41e-73
AT3G43270	PME32	4.80713	0	0			AT1G18810	PKS3	-1.48478	6.51e-10	2.34e-09
AT1G09935	AT1G09935	4.79837	5.57e-14	2.43e-13			AT1G18835	MIF3	-1.80173	0.00307642	0.00614787
AT5G03860	MLS	4.78887	0	0			AT1G18870	ICS2	-2.2281	9.81e-19	5.11e-18
AT2G30770	CYP71A13	4.78201	0	0			AT1G18980	AT1G18980	-1.46393	1.01e-29	7.16e-29
AT1G32960	SBT3.3	4.7761	6.84e-97	1.32e-95			AT1G19150	LHCA6	-2.27426	4.94e-292	4.31e-290
AT2G38530	LTP2	4.76378	0	0			AT1G19340	AT1G19340	-1.1208	2.65e-06	7.44e-06
AT1G61120	GES	4.75382	0	0			AT1G19510	RL5	-1.41556	0.0140462	0.025214
AT4G10850	SWEET7	4.7488	5.4e-12	2.16e-11			AT1G19740	AT1G19740	-1.12302	1.57e-63	2.03e-62
AT5G52720	AT5G52720	4.74844	1.17e-83	1.95e-82			AT1G19940	AtGH9B5	-1.38948	1.02e-06	2.96e-06
AT4G24340	AT4G24340	4.74817	0	0			AT1G20020	LFNR2	-2.15615	0	0
AT5G19880	PER58	4.72118	4.88e-52	5.29e-51			AT1G20030	AT1G20030	-1.99554	4.55e-42	4.15e-41
AT5G22600	AT5G22600	4.71398	2.36e-13	1.01e-12			AT1G20130	APG	-1.69131	0.0156342	0.0278066
AT5G42380	CML37	4.68874	1.37e-164	4.99e-163			AT1G20190	EXPA11	-3.37597	3.18e-153	1.05e-151
AT5G40000	AT5G40000	4.67935	1.35e-112	3.09e-111			AT1G20340	DRT112	-1.28148	2.34e-161	8.27e-160
AT1G68290	ENDO2	4.67442	0	0			AT1G20390	AT1G20390	-1.00913	1.53e-07	4.73e-07
AT5G54740	SESA5	4.67191	2.2e-26	1.44e-25			AT1G20400	AT1G20400	-1.8064	6.88e-05	0.000169405
AT2G14290	AT2G14290	4.66124	1.33e-39	1.16e-38			AT1G20620	CAT3	-1.08981	6.42e-106	1.37e-104
AT1G76210	AT1G76210	4.6474	7.7e-27	5.08e-26			AT1G20720	AT1G20720	-1.07007	2.22e-08	7.27e-08
AT3G01570	AT3G01570	4.64535	2.12e-54	2.37e-53			AT1G20810	FKBP18	-1.27357	1.89e-54	2.11e-53
AT3G61930	AT3G61930	4.63983	1.33e-37	1.12e-36			AT1G20840	MSSP1	-1.05835	3.75e-47	3.75e-46
AT5G37840	AT5G37840	4.62977	6.81e-13	2.84e-12			AT1G20990	AT1G20990	-1.56596	0.000880101	0.00189961
AT1G67980	CCOAMT	4.62676	1.23e-24	7.64e-24			AT1G21110	AT1G21110	-1.32847	7.94e-39	6.79e-38
AT5G24080	AT5G24080	4.61548	8.22e-13	3.41e-12			AT1G21130	AT1G21130	-1.06091	4.15e-139	1.21e-137
AT4G35650	IDH3	4.6144	3.08e-155	1.03e-153			AT1G21140	AT1G21140	-1.24492	7.67e-06	2.07e-05
AT4G10490	AT4G10490	4.59343	1.29e-16	6.23e-16			AT1G21150	AT1G21150	-1.43551	2.53e-08	8.28e-08
AT1G36441	AT1G36441	4.59295	1.08e-12	4.47e-12			AT1G21350	AT1G21350	-1.27471	5.8e-52	6.28e-51
AT5G22545	AT5G22545	4.58657	1.36e-12	5.58e-12			AT1G21500	AT1G21500	-1.62828	3.75e-76	5.69e-75
AT5G50270	AT5G50270	4.5862	2.05e-12	8.36e-12			AT1G21529	AT1G21529	-1.74741	0.014262	0.0255699
AT4G12500	AT4G12500	4.58595	0	0			AT1G21540	AEE9	-1.2515	1.38e-11	5.4e-11
AT2G19500	CKX2	4.5763	8.26e-23	4.89e-22			AT1G21590	AT1G21590	-1.07924	5.06e-41	4.53e-40
AT3G21840	ASK7	4.57534	1.44e-12	5.91e-12			AT1G21600	PTAC6	-1.07415	7.9e-70	1.1e-68
AT1G69930	GSTU11	4.57313	9.25e-203	4.32e-201			AT1G21670	AT1G21670	-2.04627	2.54e-88	4.46e-87
AT2G36640	ATECP63	4.55184	4.67e-87	8.08e-86			AT1G21680	AT1G21680	-1.05931	3.69e-77	5.7e-76
AT2G46400	WRKY46	4.54835	0	0			AT1G22160	AT1G22160	-1.10601	2.27e-05	5.86e-05
AT5G50770	HSD6	4.54045	1.53e-98	3.01e-97			AT1G22350	AT1G22350	-1.67256	1.7e-18	8.75e-18
AT1G66700	PXMT1	4.53454	3.78e-167	1.41e-165			AT1G22370	UGT85A5	-1.60477	8.84e-25	5.54e-24
AT4G01360	AT4G01360	4.5233	3e-40	2.64e-39			AT1G22490	BHLH94	-1.40204	2.09e-10	7.71e-10
AT1G65090	AT1G65090	4.52147	6.25e-11	2.38e-10			AT1G22500	ATL15	-2.44815	2.5e-125	6.42e-124
AT1G08080	ACA7	4.51186	3.52e-12	1.42e-11			AT1G22590	AGL87	-1.26401	4.83e-19	2.54e-18
AT4G09600	GASA3	4.51169	3.68e-20	2e-19			AT1G22630	AT1G22630	-1.11704	1.25e-25	8.02e-25
AT5G24950	CYP71A15	4.49519	1.32e-16	6.37e-16			AT1G22640	MYB3	-1.97064	6.15e-35	4.87e-34
AT1G68380	AT1G68380	4.49281	5.87e-12	2.34e-11			AT1G22650	INVD	-1.34036	2.05e-18	1.06e-17
AT5G07560	GRP20	4.49074	1.35e-17	6.75e-17			AT1G22700	AT1G22700	-1.0158	1.77e-87	3.07e-86
AT1G27990	AT1G27990	4.48971	5.88e-12	2.35e-11			AT1G22740	RABG3B	-1.13327	1.01e-15	4.72e-15
AT3G54700	PHT1-7	4.47196	1.54e-43	1.45e-42			AT1G22760	PAB3	-1.65967	0.0184538	0.0324304
AT1G22015	B3GALT5	4.46137	8.22e-12	3.26e-11			AT1G22885	AT1G22885	-1.13175	4.08e-11	1.57e-10
AT4G37990	CAD8	4.45957	0	0			AT1G22890	AT1G22890	-1.40702	1.8e-25	1.15e-24
AT1G60090	BGLU4	4.4591	6.86e-77	1.05e-75			AT1G23090	SULTR3	-1.75002	1.27e-83	2.11e-82
AT1G66570	SUC7	4.45602	8.72e-12	3.45e-11			AT1G23130	AT1G23130	-1.72778	3.02e-300	2.73e-298
AT1G67481	MIR839A	4.43903	8.81e-14	3.82e-13			AT1G23200	PME6	-2.35533	6.1e-17	2.98e-16
AT1G09380	AT1G09380	4.42638	1.27e-242	7.98e-241			AT1G23205	AT1G23205	-1.22506	1.99e-09	6.96e-09
AT4G39500	CYP96A11	4.41913	5.06e-75	7.57e-74			AT1G23210	AtGH9B6	-1.25852	0.024733	0.0424151
AT5G38170	AT5G38170	4.41581	1.45e-11	5.69e-11			AT1G23310	GGAT1	-1.42611	1.39e-225	7.76e-224
AT3G27660	OL2	4.40971	0	0			AT1G23390	AT1G23390	-3.75582	0	0
AT5G55800	AT5G55800	4.40788	1.51e-12	6.21e-12			AT1G23400	CAF2	-1.47867	1.1e-118	2.65e-117
AT4G04090	AT4G04090	4.4063	1.57e-11	6.15e-11			AT1G23740	AT1G23740	-1.14487	6.07e-99	1.21e-97
AT1G24580	AT1G24580	4.3933	2.54e-29	1.77e-28			AT1G23790	AT1G23790	-1.29154	2.44e-14	1.08e-13
AT1G12180	AT1G12180	4.38843	2.47e-11	9.57e-11			AT1G24148	AT1G24148	-1.27602	1.01e-17	5.07e-17
AT2G29350	SAG13	4.37939	0	0			AT1G24260	2025-09-03	-2.26072	5.4e-51	5.74e-50
AT1G26240	AT1G26240	4.37652	1.14e-15	5.31e-15			AT1G24470	KCR2	-1.27689	0.000630656	0.00138535
AT5G24600	AT5G24600	4.37532	0	0			AT1G24577	AT1G24577	-1.42197	8.13e-05	0.0001989
AT1G07725	ATEXO70H6	4.36773	2.84e-11	1.1e-10			AT1G25250	IDD16	-3.85108	2.53e-33	1.94e-32
AT3G25490	WAKL16	4.35515	3.48e-11	1.34e-10			AT1G25430	AT1G25430	-2.20056	0.000789349	0.00171284
AT2G26380	AT2G26380	4.33018	3e-47	3.01e-46			AT1G25440	COL16	-1.45487	5.09e-125	1.3e-123
AT2G44070	AT2G44070	4.32481	7.65e-18	3.85e-17			AT1G25450	KCS5	-1.65809	3.28e-70	4.63e-69
AT5G24550	BGLU32	4.32368	5.46e-11	2.08e-10			AT1G25472	CPuORF54	-1.36369	3.81e-05	9.66e-05
AT2G24000	SCPL22	4.31621	1.85e-20	1.02e-19			AT1G26230	CPN60B4	-2.57676	8.78e-137	2.52e-135
AT1G23201	AT1G23201	4.30364	5.98e-11	2.27e-10			AT1G26360	MES13	-2.58808	2.98e-11	1.15e-10
AT2G41225	AT2G41225	4.29652	7.11e-11	2.7e-10			AT1G26600	CLE9	-1.31826	0.000289053	0.000663003
AT5G44990	AT5G44990	4.29492	4.97e-21	2.78e-20			AT1G26761	AT1G26761	-1.89241	1.16e-53	1.29e-52
AT1G03790	SOM	4.29107	8.41e-30	5.95e-29			AT1G26920	AT1G26920	-1.00662	5.99e-38	5.05e-37
AT4G31615	REM2	4.291	1.88e-20	1.03e-19			AT1G27020	AT1G27020	-1.07553	8.04e-120	1.97e-118
AT5G55150	AT5G55150	4.28963	5.41e-58	6.41e-57			AT1G27360	SPL11	-1.07597	6.43e-10	2.31e-09
AT2G45760	BAP2	4.28211	1.02e-80	1.64e-79			AT1G27480	LCAT1	-1.31787	1.41e-56	1.63e-55
AT3G15170	NAC054	4.27925	2.44e-25	1.55e-24			AT1G27660	BHLH110	-1.11484	1.72e-10	6.38e-10
AT4G28460	AT4G28460	4.27725	1.41e-25	9.02e-25			AT1G27940	ABCB13	-2.83807	3.03e-11	1.17e-10
AT1G13520	AT1G13520	4.26011	3.16e-161	1.12e-159			AT1G28010	ABCB14	-2.25078	5.12e-57	5.98e-56
AT5G39580	PER62	4.25891	0	0			AT1G28230	PUP1	-2.11134	1.28e-43	1.21e-42
AT1G59950	AT1G59950	4.25256	2.87e-56	3.31e-55			AT1G28290	AGP31	-1.35511	8.17e-71	1.16e-69
AT3G01830	CML40	4.24577	1.03e-62	1.31e-61			AT1G29070	RPL34	-1.85277	4.39e-160	1.54e-158
AT3G17520	AT3G17520	4.2389	1.54e-72	2.23e-71			AT1G29390	COR413IM2	-1.2162	5.45e-50	5.68e-49
AT1G32049	AT1G32049	4.235	3.49e-20	1.9e-19			AT1G29395	COR413IM1	-1.82475	5.51e-76	8.35e-75
AT3G21320	AT3G21320	4.22777	1.58e-10	5.9e-10			AT1G29430	SAUR62	-2.20594	7.72e-14	3.35e-13
AT2G37435	AT2G37435	4.22012	1.81e-10	6.7e-10			AT1G29440	SAUR63	-1.80757	2.8e-09	9.71e-09
AT2G45685	AT2G45685	4.21923	1.95e-10	7.21e-10			AT1G29450	SAUR64	-2.01089	4.71e-09	1.61e-08
AT5G44310	AT5G44310	4.20942	5.93e-32	4.42e-31			AT1G29460	SAUR65	-3.21406	4.2e-09	1.44e-08
AT2G19900	NADP-ME1	4.19461	6.37e-101	1.3e-99			AT1G29500	SAUR66	-1.62953	2.12e-06	6.01e-06
AT5G02230	AT5G02230	4.1944	0	0			AT1G29510	SAUR67	-1.3301	4.18e-08	1.35e-07
AT1G74010	AT1G74010	4.1919	0	0			AT1G29530	AT1G29530	-1.12836	1.8e-20	9.89e-20
AT1G26410	AT1G26410	4.16966	4.73e-11	1.81e-10			AT1G29600	AT1G29600	-2.06175	0.000417935	0.00094008
AT2G32830	PHT1-5	4.16645	0	0			AT1G29670	AT1G29670	-2.23228	2.3e-307	2.19e-305
AT2G22760	BHLH19	4.16233	6.19e-32	4.61e-31			AT1G29720	RFK1	-4.64811	4.7e-90	8.37e-89
AT3G52810	PAP21	4.16147	3.81e-10	1.39e-09			AT1G29910	LHCB1.2	-1.63973	0	0
AT3G46080	ZAT8	4.15922	2.31e-142	6.95e-141			AT1G29920	LHCB1.2	-2.2894	0	0
AT4G02170	AT4G02170	4.15338	6.81e-43	6.31e-42			AT1G29930	LHCB1.3	-1.07102	9.61e-114	2.22e-112
AT1G22110	AT1G22110	4.15244	8.71e-151	2.82e-149			AT1G30050	AT1G30050	-1.55303	0.0150596	0.0268735
AT5G40348	AT5G40348	4.15016	7.93e-13	3.29e-12			AT1G30110	NUDT25	-1.13406	2.09e-17	1.04e-16
AT3G28150	AXY4L	4.14836	3.25e-225	1.8e-223			AT1G30170	AT1G30170	-1.15768	0.00302995	0.00606013
AT1G20790	AT1G20790	4.14776	4.76e-10	1.72e-09			AT1G30260	AT1G30260	-1.04055	1.15e-08	3.85e-08
AT3G54530	AT3G54530	4.14747	4.11e-18	2.09e-17			AT1G30280	AT1G30280	-1.89245	4.49e-36	3.65e-35
AT5G08460	AT5G08460	4.13804	2.54e-09	8.81e-09			AT1G30282	AT1G30282	-2.41031	7.87e-06	2.12e-05
AT4G18680	AT4G18680	4.13504	5.89e-10	2.12e-09			AT1G30360	ERD4	-1.19305	1.75e-155	5.91e-154
AT3G58060	MTPC3	4.12761	7.65e-162	2.73e-160			AT1G30380	PSAK	-1.37695	1.08e-26	7.09e-26
AT4G22210	LCR85	4.11357	5.22e-24	3.2e-23			AT1G30520	AAE14	-2.46459	4.7e-77	7.24e-76
AT5G56970	CKX3	4.08732	4.45e-90	7.93e-89			AT1G30820	AT1G30820	-1.16676	1.37e-80	2.21e-79
AT4G22050	AT4G22050	4.08703	5.04e-09	1.72e-08			AT1G31040	AT1G31040	-1.69519	5.13e-06	1.4e-05
AT2G41850	ADPG2	4.08613	1.81e-93	3.36e-92			AT1G31200	PP2A9	-1.86543	3.49e-10	1.27e-09
AT2G26010	PDF1.3	4.08368	5.06e-122	1.27e-120			AT1G31310	AT1G31310	-2.24652	8e-11	3.02e-10
AT1G65880	AAE20	4.08301	3.21e-38	2.72e-37			AT1G31330	PSAF	-1.69948	0	0
AT2G26020	PDF1.2B	4.07503	2.52e-155	8.49e-154			AT1G31335	AT1G31335	-1.12795	1.37e-07	4.26e-07
AT5G13080	WRKY75	4.07091	2.92e-220	1.57e-218			AT1G31430	PCMP-E55	-1.06994	4.31e-05	0.000108446
AT1G77950	AGL67	4.07032	4.28e-17	2.11e-16			AT1G31690	AT1G31690	-5.92284	2.42e-163	8.8e-162
AT5G51990	DREB1D	4.06908	1.1e-09	3.9e-09			AT1G31800	CYP97A3	-1.03754	2.01e-107	4.37e-106
AT3G32925	AT3G32925	4.05787	1.6e-20	8.84e-20			AT1G31920	PCMP-H11	-1.53429	7.04e-23	4.18e-22
AT5G38900	AT5G38900	4.05244	0	0			AT1G32060	PRK	-1.4921	4.3e-184	1.82e-182
AT1G30370	AT1G30370	4.04692	1.87e-255	1.27e-253			AT1G32070	NSI	-1.10168	1.9e-57	2.24e-56
AT5G43650	BHLH92	4.04335	8.79e-30	6.22e-29			AT1G32080	PLGG1	-2.86972	0	0
AT3G07250	AT3G07250	4.04136	3e-16	1.43e-15			AT1G32160	AT1G32160	-1.13066	3.89e-72	5.6e-71
AT3G24650	ABI3	4.03696	1.8e-10	6.66e-10			AT1G32200	ATS1	-1.35589	3.79e-98	7.4e-97
AT4G09610	GASA2	4.03625	1.73e-09	6.09e-09			AT1G32450	NPF7.3	-1.64937	8.87e-157	3.03e-155
AT5G43000	AT5G43000	4.03582	1.94e-09	6.82e-09			AT1G32470	GDH3	-1.56243	1.21e-143	3.7e-142
AT1G27461	AT1G27461	4.0332	7.93e-10	2.84e-09			AT1G32510	ANAC011	-1.54221	0.00141079	0.00295945
AT2G04500	AT2G04500	4.02102	9.25e-65	1.21e-63			AT1G32520	AT1G32520	-1.22367	1.11e-14	4.99e-14
AT3G27025	AT3G27025	4.02011	1.42e-35	1.14e-34			AT1G32550	FdC1	-1.31604	4.14e-40	3.63e-39
AT1G34047	AT1G34047	4.01623	2.16e-09	7.55e-09			AT1G32850	UBP11	-2.64118	0.000206436	0.000482256
AT4G21840	MSRB8	4.01585	0	0			AT1G32990	RPL11	-1.44835	1.04e-137	3e-136
AT2G15010	AT2G15010	4.01505	9.36e-09	3.14e-08			AT1G33090	AT1G33090	-1.95149	2.42e-05	6.25e-05
AT4G15396	CYP702A6	4.01325	5.4e-284	4.46e-282			AT1G33170	AT1G33170	-2.20325	2e-128	5.28e-127
AT4G31660	REM7	4.00964	2.58e-09	8.95e-09			AT1G33475	AT1G33475	-1.41035	0.000164537	0.000388736
AT5G64870	FLOT3	4.00911	1.93e-275	1.47e-273			AT1G33615	AT1G33615	-1.02442	0.00670418	0.0126931
AT5G39100	GLP6	4.00819	9.52e-12	3.76e-11			AT1G33670	AT1G33670	-2.9883	2.26e-05	5.84e-05
AT4G21830	MSRB7	4.00469	0	0			AT1G33810	AT1G33810	-1.06269	8.28e-40	7.23e-39
AT2G41360	AT2G41360	4.00252	2.83e-09	9.82e-09			AT1G33811	AT1G33811	-1.41222	2.4e-75	3.61e-74
AT4G32630	AT4G32630	3.99544	1.98e-12	8.07e-12			AT1G34000	OHP2	-1.22301	8.57e-39	7.32e-38
AT1G80160	AT1G80160	3.96669	2.1e-177	8.4e-176			AT1G34040	TAR3	-1.50256	2.42e-15	1.12e-14
AT4G16550	AT4G16550	3.9658	3.92e-09	1.35e-08			AT1G34330	AT1G34330	-1.3852	1.73e-07	5.33e-07
AT5G55240	PXG2	3.96343	1.86e-09	6.55e-09			AT1G34380	AT1G34380	-1.01917	1.05e-13	4.52e-13
AT4G31900	PKR2	3.95589	1.24e-19	6.64e-19			AT1G34490	AT1G34490	-1.69321	0.017622	0.0311011
AT1G70390	AT1G70390	3.95479	8.16e-38	6.86e-37			AT1G35170	AT1G35170	-1.58596	0.0040499	0.00795781
AT3G48850	MPT2	3.95355	3.83e-293	3.38e-291			AT1G35180	AT1G35180	-2.59828	7.71e-21	4.29e-20
AT4G25810	XTH23	3.95187	0	0			AT1G35250	AT1G35250	-1.50102	3.8e-05	9.62e-05
AT1G70270	AT1G70270	3.9475	6.22e-99	1.24e-97			AT1G35680	RPL21	-1.57702	6.13e-305	5.71e-303
AT4G02160	AT4G02160	3.94734	9.72e-14	4.2e-13			AT1G35830	AT1G35830	-1.39337	6.38e-12	2.54e-11
AT4G25980	PER43	3.93719	7.14e-26	4.6e-25			AT1G36180	ACC2	-1.02086	1.12e-35	9.01e-35
AT1G78390	NCED9	3.93564	3.54e-14	1.56e-13			AT1G36390	AT1G36390	-1.50345	3.95e-95	7.48e-94
AT5G03210	AT5G03210	3.90975	7.76e-103	1.61e-101			AT1G42550	PMI1	-1.37895	9.05e-94	1.69e-92
AT2G29150	AT2G29150	3.90331	7.91e-09	2.67e-08			AT1G42970	GAPB	-1.32485	0	0
AT1G05100	MAPKKK18	3.89994	4.09e-95	7.75e-94			AT1G43560	Aty2	-1.77738	8.54e-65	1.12e-63
AT1G32890	AT1G32890	3.89351	8.64e-09	2.9e-08			AT1G43650	AT1G43650	-1.35704	2.06e-12	8.39e-12
AT1G64160	DIR5	3.89029	1.01e-93	1.88e-92			AT1G43670	AT1G43670	-1.63119	4.47e-248	2.86e-246
AT1G23730	BCA3	3.88837	0	0			AT1G43675	AT1G43675	-2.78163	1.15e-14	5.16e-14
AT2G24130	AT2G24130	3.88569	9.1e-09	3.06e-08			AT1G44000	SGRL	-1.16857	8.84e-52	9.55e-51
AT1G02770	AT1G02770	3.87825	8.54e-186	3.66e-184			AT1G44030	AT1G44030	-2.14064	0.00264453	0.00534036
AT3G20210	dVPE	3.87512	2.24e-31	1.65e-30			AT1G44110	CYCA1-1	-1.01102	1.32e-16	6.4e-16
AT2G47780	AT2G47780	3.87403	2.69e-250	1.77e-248			AT1G44160	AT1G44160	-1.11713	8.32e-05	0.000203343
AT1G21850	sks8	3.86626	7.25e-10	2.6e-09			AT1G44318	HEMB2	-2.35152	0.000983115	0.00210727
AT5G01380	GT-3A	3.86516	4.09e-84	6.87e-83			AT1G44608	AT1G44608	-1.0036	0.00125044	0.00264073
AT3G51570	AT3G51570	3.86234	3.67e-137	1.06e-135			AT1G44920	AT1G44920	-1.40927	6.34e-81	1.03e-79
AT1G47990	GA2OX4	3.86216	1.52e-64	1.99e-63			AT1G45010	AT1G45010	-1.87184	2.08e-17	1.03e-16
AT5G22570	WRKY38	3.86127	6.53e-80	1.04e-78			AT1G45191	BGLU1	-1.1092	5.62e-15	2.56e-14
AT2G24010	scpl23	3.85724	7.73e-153	2.55e-151			AT1G45201	ATTLL1	-1.97951	0	0
AT2G23180	CYP96A1	3.85339	0	0			AT1G45230	AT1G45230	-1.36471	6.88e-60	8.46e-59
AT3G46070	AT3G46070	3.85228	1.49e-08	4.95e-08			AT1G45474	LHCA5	-1.1844	4.78e-90	8.53e-89
AT3G02480	AT3G02480	3.85114	2.89e-51	3.1e-50			AT1G46552	AT1G46552	-1.51173	0.00696858	0.0131514
AT1G28480	GRXC9	3.84704	4.63e-210	2.31e-208			AT1G47440	AT1G47440	-3.86387	2.15e-10	7.93e-10
AT1G03106	AT1G03106	3.84441	3.52e-37	2.92e-36			AT1G47520	AT1G47520	-2.06696	1.6e-34	1.26e-33
AT2G02990	RNS1	3.84149	0	0			AT1G47530	AT1G47530	-1.28546	6.74e-96	1.29e-94
AT1G10680	ABCB10	3.83371	1.81e-17	9.02e-17			AT1G47580	DYW1	-1.69439	1.93e-28	1.32e-27
AT5G52700	AT5G52700	3.82408	1.86e-08	6.14e-08			AT1G47760	AGL102	-1.35015	0.000641321	0.00140741
AT5G19890	PER59	3.82019	0	0			AT1G47930	AT1G47930	-2.06131	0.00383111	0.00755607
AT5G01300	AT5G01300	3.81116	9.51e-33	7.19e-32			AT1G48100	AT1G48100	-1.59942	2.14e-18	1.1e-17
AT5G05340	PER52	3.80819	9.56e-217	4.97e-215			AT1G48330	AT1G48330	-1.28788	4.61e-13	1.94e-12
AT3G07620	AT3G07620	3.80727	6.41e-11	2.44e-10			AT1G48350	RPL18	-1.57915	1.37e-121	3.43e-120
AT4G12735	AT4G12735	3.8068	7.05e-62	8.87e-61			AT1G48500	TIFY6A	-1.22144	1.78e-11	6.95e-11
AT1G53990	GLIP3	3.80662	1.94e-143	5.92e-142			AT1G48520	GATB	-1.01165	2.75e-76	4.19e-75
AT5G07210	ARR21	3.78927	2.85e-08	9.28e-08			AT1G48570	AT1G48570	-1.28591	8.34e-48	8.44e-47
AT2G21490	LEA	3.77224	3.12e-08	1.01e-07			AT1G48670	AT1G48670	-2.0105	2.05e-05	5.33e-05
AT4G30280	XTH18	3.76213	0	0			AT1G48698	AT1G48698	-1.71301	0.0161605	0.0286768
AT1G04580	AAO4	3.76168	6.26e-69	8.66e-68			AT1G48820	AT1G48820	-2.26266	0.000653385	0.00143261
AT5G17350	AT5G17350	3.76006	2.92e-232	1.71e-230			AT1G49010	AT1G49010	-1.30627	1.84e-47	1.85e-46
AT5G57550	XTH25	3.74764	1.43e-209	7.09e-208			AT1G49130	COL8	-2.29883	1.9e-77	2.95e-76
AT2G04495	AT2G04495	3.73748	4.08e-27	2.7e-26			AT1G49200	ATL75	-1.65341	8.14e-11	3.07e-10
AT1G29100	AT1G29100	3.72967	9.97e-08	3.12e-07			AT1G49210	ATL76	-1.53313	0.00319233	0.00636513
AT1G62760	AT1G62760	3.72612	2.56e-293	2.26e-291			AT1G49230	ATL78	-1.07991	8.12e-08	2.56e-07
AT1G14550	PER5	3.719	1.74e-13	7.44e-13			AT1G49310	AT1G49310	-1.44448	1.01e-11	3.97e-11
AT1G15330	PV42A	3.71836	3.24e-25	2.05e-24			AT1G49380	CCS1	-1.12329	1.32e-59	1.62e-58
AT1G49330	AT1G49330	3.71828	2.88e-22	1.68e-21			AT1G49430	LACS2	-1.3029	4.2e-68	5.76e-67
AT5G61610	AT5G61610	3.71719	2.39e-237	1.46e-235			AT1G49450	AT1G49450	-2.23195	1.33e-10	4.98e-10
AT1G70380	AT1G70380	3.71407	5.16e-12	2.07e-11			AT1G49470	AT1G49470	-1.31009	2.59e-24	1.6e-23
AT2G31625	AT2G31625	3.70862	5.76e-08	1.84e-07			AT1G49490	PEX2	-1.65335	3.67e-16	1.74e-15
AT5G61690	ATATH15	3.70576	5.69e-08	1.82e-07			AT1G49500	AT1G49500	-2.75267	6.09e-153	2.01e-151
AT1G30220	INT2	3.70526	1.28e-149	4.1e-148			AT1G49510	emb1273	-1.25434	7.26e-47	7.22e-46
AT2G22180	AT2G22180	3.70011	8.6e-16	4.04e-15			AT1G49640	CXE3	-2.13006	0.00010374	0.000250938
AT4G13300	TPS13	3.69286	3.45e-64	4.5e-63			AT1G49650	CXE4	-1.55057	1.51e-48	1.54e-47
AT5G40350	MYB24	3.69187	8.58e-09	2.89e-08			AT1G49840	AT1G49840	-1.05363	1.86e-15	8.61e-15
AT5G64905	PEP3	3.68799	1.05e-30	7.61e-30			AT1G49860	GSTF14	-4.26795	1.16e-179	4.71e-178
AT3G02410	ICMEL2	3.68635	1.72e-63	2.22e-62			AT1G49975	AT1G49975	-2.25695	4.48e-96	8.56e-95
AT2G30432	TCL1	3.6858	3.76e-80	6.03e-79			AT1G49990	AT1G49990	-1.45677	9.27e-09	3.11e-08
AT5G28520	JAL40	3.68217	7.08e-08	2.25e-07			AT1G50280	AT1G50280	-2.709	1.54e-15	7.16e-15
AT2G14620	XTH10	3.67823	3.51e-143	1.07e-141			AT1G50320	ATHX	-1.17578	2.2e-85	3.73e-84
AT2G13810	ALD1	3.67379	5.32e-12	2.13e-11			AT1G50450	AT1G50450	-1.17349	2.85e-57	3.34e-56
AT1G53480	MRD1	3.6724	5.53e-23	3.29e-22			AT1G50732	AT1G50732	-2.35568	2.19e-45	2.13e-44
AT5G40590	AT5G40590	3.66776	5.77e-84	9.66e-83			AT1G50900	LTD	-1.69988	8.95e-161	3.14e-159
AT3G05950	AT3G05950	3.66625	5.93e-25	3.73e-24			AT1G50930	AT1G50930	-1.77635	6.02e-07	1.78e-06
AT1G52565	AT1G52565	3.66217	7.03e-120	1.72e-118			AT1G51080	AT1G51080	-1.54876	1.15e-21	6.58e-21
AT3G25795	AT3G25795	3.65776	5.74e-54	6.39e-53			AT1G51100	AT1G51100	-1.44322	5.63e-51	5.97e-50
AT4G36950	MAPKKK21	3.65565	5.14e-104	1.08e-102			AT1G51355	AT1G51355	-1.13635	0.00697216	0.0131572
AT1G60970	AT1G60970	3.65487	3.17e-88	5.55e-87			AT1G51400	AT1G51400	-1.17157	4.07e-47	4.06e-46
AT2G35980	YLS9	3.65297	1.04e-45	1.02e-44			AT1G51440	AT1G51440	-1.17828	0.00141603	0.00296944
AT1G29290	AT1G29290	3.64772	5.03e-113	1.16e-111			AT1G51500	ABCG12	-1.41792	7.37e-110	1.64e-108
AT4G37370	CYP81D8	3.64505	0	0			AT1G51790	AT1G51790	-1.37059	3.83e-17	1.89e-16
AT4G11040	AT4G11040	3.64498	7.79e-08	2.46e-07			AT1G51805	AT1G51805	-1.5895	3.16e-139	9.26e-138
AT2G32370	HDG3	3.64245	1.18e-07	3.69e-07			AT1G51830	AT1G51830	-2.14624	5.58e-130	1.5e-128
AT3G11260	WOX5	3.63925	3.81e-20	2.07e-19			AT1G51840	AT1G51840	-1.86354	1.19e-26	7.81e-26
AT1G50750	AT1G50750	3.63772	3.47e-200	1.6e-198			AT1G52000	JAL5	-1.47156	4.5e-141	1.34e-139
AT1G69880	TRX8	3.6356	0	0			AT1G52100	AT1G52100	-1.52993	1.32e-54	1.48e-53
AT2G31345	AT2G31345	3.62797	1.51e-07	4.68e-07			AT1G52190	NPF1.2	-1.82507	2.59e-172	1e-170
AT5G38910	AT5G38910	3.62494	1.25e-07	3.89e-07			AT1G52220	CURT1C	-1.17981	1.38e-62	1.75e-61
AT3G29030	EXPA5	3.6229	0	0			AT1G52230	PSAH2	-1.51807	3.24e-138	9.43e-137
AT2G34202	MIR399D	3.61908	9.06e-37	7.45e-36			AT1G52270	AT1G52270	-2.20557	9.15e-14	3.96e-13
AT5G55360	AT3	3.60622	1.89e-12	7.72e-12			AT1G52315	AT1G52315	-1.61216	8.52e-08	2.68e-07
AT1G67856	AT1G67856	3.60097	2.35e-14	1.04e-13			AT1G52770	AT1G52770	-1.6163	0.0199688	0.0348577
AT1G45616	AtRLP6	3.59998	1.11e-146	3.48e-145			AT1G52800	AT1G52800	-3.35091	2.85e-17	1.41e-16
AT2G22750	BHLH18	3.59354	3.32e-20	1.81e-19			AT1G52827	CDT1	-1.84832	6.24e-09	2.12e-08
AT3G60966	AT3G60966	3.58673	3.88e-33	2.96e-32			AT1G52870	AT1G52870	-1.20515	8.55e-89	1.51e-87
AT2G31690	AT2G31690	3.58027	4.29e-09	1.47e-08			AT1G53120	AT1G53120	-1.09292	6.49e-24	3.97e-23
AT3G54510	AT3G54510	3.57997	1.65e-56	1.91e-55			AT1G53250	AT1G53250	-1.01294	3.65e-14	1.61e-13
AT4G27140	AT2S1	3.57785	4.55e-07	1.36e-06			AT1G53633	AT1G53633	-1.45873	0.00281349	0.00566033
AT5G47850	CCR4	3.56147	3.17e-19	1.67e-18			AT1G53800	AT1G53800	-1.47849	1.16e-98	2.3e-97
AT3G09400	PLL3	3.56095	3.88e-14	1.71e-13			AT1G53870	AT1G53870	-1.33235	1.07e-10	4.02e-10
AT2G41230	ORS1	3.56016	0	0			AT1G53885	AT1G53885	-2.54213	3.26e-82	5.35e-81
AT5G12020	HSP17.6	3.55306	4.46e-64	5.8e-63			AT1G53890	AT1G53890	-1.02311	0.000675142	0.00147809
AT4G11642	AT4G11642	3.55251	8.75e-10	3.12e-09			AT1G53903	AT1G53903	-2.55717	1.38e-85	2.34e-84
AT3G28415	ABCB22	3.5498	2.03e-12	8.29e-12			AT1G54040	ESP	-1.35433	2.34e-28	1.59e-27
AT5G56368	AT5G56368	3.54626	7.97e-14	3.46e-13			AT1G54350	ABCC2	-1.15036	3.63e-46	3.57e-45
AT3G26820	AT3G26820	3.53717	3.09e-28	2.1e-27			AT1G54355	AT1G54355	-1.18488	0.00113393	0.00240824
AT2G33020	AtRLP24	3.53221	2.07e-34	1.62e-33			AT1G54410	AT1G54410	-1.67076	4.16e-291	3.6e-289
AT1G07645	ATDSI-1VOC	3.53114	7.06e-11	2.68e-10			AT1G54500	AT1G54500	-1.15861	3.78e-93	7e-92
AT1G57630	AT1G57630	3.531	1.02e-52	1.11e-51			AT1G54660	AT1G54660	-1.39827	5.58e-28	3.77e-27
AT1G48470	GLN1-5	3.52725	0	0			AT1G54780	TLP18.3	-1.37687	2.54e-253	1.7e-251
AT2G28610	WOX3	3.52123	5.31e-19	2.79e-18			AT1G54820	AT1G54820	-3.36422	5.59e-180	2.28e-178
AT5G22460	AT5G22460	3.51323	3.71e-244	2.35e-242			AT1G55140	AT1G55140	-1.23329	1.02e-27	6.84e-27
AT3G45130	LAS1	3.51221	1.53e-179	6.2e-178			AT1G55370	NDF5	-2.44096	3.4e-123	8.58e-122
AT1G18970	GLP1	3.50664	5.65e-210	2.81e-208			AT1G55490	CPN60B1	-1.73846	0	0
AT3G22910	ACA13	3.50627	6.02e-160	2.1e-158			AT1G55670	PSAG	-1.41328	0	0
AT3G32920	AT3G32920	3.50454	3.93e-07	1.18e-06			AT1G56050	AT1G56050	-1.34176	3.67e-72	5.3e-71
AT3G03540	NPC5	3.50251	2.85e-08	9.29e-08			AT1G56500	AT1G56500	-1.0177	1.52e-99	3.05e-98
AT1G32560	AT1G32560	3.50047	4.39e-07	1.31e-06			AT1G56670	LIP4	-1.02912	0.000175878	0.000414424
AT3G50770	CML41	3.49658	2.75e-117	6.52e-116			AT1G57590	PAE2	-1.24186	3.92e-09	1.35e-08
AT5G07190	ATS3	3.49296	6.78e-80	1.08e-78			AT1G58370	RXF12	-1.62104	8.41e-43	7.78e-42
AT5G41280	CRRSP57	3.4903	1.68e-59	2.06e-58			AT1G58520	RXW8	-1.34002	1.03e-22	6.09e-22
AT4G37710	VQ29	3.48977	1.28e-07	3.97e-07			AT1G58561	AT1G58561	-1.69554	2.24e-30	1.62e-29
AT3G54520	AT3G54520	3.48748	2.53e-14	1.12e-13			AT1G58602	AT1G58602	-1.39778	1.29e-146	4.02e-145
AT1G35290	AT1G35290	3.48504	4.53e-70	6.36e-69			AT1G59720	PCMP-H51	-1.52738	9.25e-12	3.66e-11
AT2G30115	AT2G30115	3.48273	5.24e-07	1.56e-06			AT1G59840	CCB4	-1.54353	1.39e-76	2.12e-75
AT1G08440	ALMT2	3.48189	2.05e-11	7.97e-11			AT1G59990	RH22	-1.03126	7.18e-71	1.02e-69
AT5G45890	SAG12	3.48144	4.67e-07	1.39e-06			AT1G60000	AT1G60000	-1.00788	5.1e-73	7.46e-72
AT2G27380	EPR1	3.4793	9.65e-07	2.81e-06			AT1G60160	POT12	-1.39553	5.39e-69	7.47e-68
AT5G61890	ERF114	3.47576	3.12e-56	3.6e-55			AT1G60260	BGLU5	-1.52458	6.28e-83	1.04e-81
AT1G76640	CML39	3.47403	5.78e-60	7.12e-59			AT1G60270	BGLU6	-1.40802	1.71e-27	1.15e-26
AT1G12610	DREB1F	3.47349	5.05e-27	3.34e-26			AT1G60360	AT1G60360	-1.06436	0.000221632	0.00051547
AT3G15670	AT3G15670	3.47148	2.74e-20	1.5e-19			AT1G60390	PG1	-1.1112	1.76e-16	8.47e-16
AT1G61800	GPT2	3.46848	0	0			AT1G60460	AT1G60460	-1.89932	1.43e-09	5.06e-09
AT1G69180	CRC	3.46272	5.5e-07	1.63e-06			AT1G60470	GOLS4	-2.25133	2.14e-14	9.51e-14
AT3G61190	BAP1	3.45902	0	0			AT1G60600	ABC4	-1.96876	2.16e-141	6.45e-140
AT3G60730	PME36	3.45619	1.75e-27	1.17e-26			AT1G60800	NIK3	-1.13555	6.76e-73	9.86e-72
AT5G49620	MYB78	3.45454	7.57e-34	5.85e-33			AT1G60950	FD2	-1.69131	2.89e-162	1.04e-160
AT1G19020	AT1G19020	3.45417	1.28e-299	1.16e-297			AT1G61080	AT1G61080	-1.02352	5.05e-05	0.000126091
AT5G50830	AT5G50830	3.4476	6.4e-07	1.89e-06			AT1G61130	SCPL32	-1.69149	0.00816522	0.0152414
AT5G39200	AT5G39200	3.44551	6.37e-07	1.88e-06			AT1G61190	AT1G61190	-1.17543	1.43e-98	2.82e-97
AT1G21230	WAK5	3.44484	5.88e-08	1.88e-07			AT1G61270	AT1G61270	-2.65863	0.000186715	0.000438794
AT1G44941	AT1G44941	3.4399	6.71e-07	1.98e-06			AT1G61300	AT1G61300	-2.01488	1e-66	1.35e-65
AT5G40900	AT5G40900	3.4352	1.32e-08	4.4e-08			AT1G61320	AT1G61320	-2.19704	0.00205489	0.00421041
AT2G35290	AT2G35290	3.43328	6.31e-104	1.32e-102			AT1G61480	AT1G61480	-1.64846	5.14e-07	1.53e-06
AT5G57123	AT5G57123	3.4324	1.45e-34	1.15e-33			AT1G61520	LHCA3	-1.47279	0	0
AT3G10930	AT3G10930	3.42924	1.74e-275	1.33e-273			AT1G61795	RIC9	-1.45546	1.47e-15	6.84e-15
AT5G64810	WRKY51	3.42464	6.3e-73	9.18e-72			AT1G61950	CPK19	-1.56032	8e-05	0.000196053
AT5G22530	AT5G22530	3.42388	4.04e-07	1.21e-06			AT1G62190	FAD4L1	-2.73477	3.99e-05	0.000100844
AT5G61605	ESFL10	3.41715	8.28e-07	2.42e-06			AT1G62262	SLAH4	-1.11859	2.59e-05	6.66e-05
AT1G15610	AT1G15610	3.41379	8.52e-07	2.49e-06			AT1G62280	SLAH1	-1.31416	5.69e-06	1.55e-05
AT2G43050	PME16	3.40849	3.53e-90	6.31e-89			AT1G62400	HT1	-1.33133	3.79e-05	9.6e-05
AT2G32210	AT2G32210	3.40262	2.76e-133	7.64e-132			AT1G62480	AT1G62480	-1.24243	1.33e-63	1.72e-62
AT3G54150	AT3G54150	3.39817	2.08e-237	1.27e-235			AT1G62560	FMOGS-OX3	-1.42649	3.62e-54	4.03e-53
AT4G34210	ASK11	3.39576	5.64e-42	5.14e-41			AT1G62630	AT1G62630	-1.73182	2.03e-45	1.98e-44
AT1G34967	AT1G34967	3.39152	2.25e-07	6.89e-07			AT1G62660	BFRUCT3	-2.23018	7.83e-235	4.63e-233
AT2G29460	GSTU4	3.3894	0	0			AT1G62750	CPEFG	-1.62572	3.67e-249	2.38e-247
AT1G62710	bVPE	3.38853	0	0			AT1G62780	AT1G62780	-1.53287	4.82e-128	1.27e-126
AT2G25940	ALPHA-VPE	3.37326	5.02e-215	2.58e-213			AT1G62975	BHLH125	-1.47506	8.44e-08	2.66e-07
AT3G15370	EXPA12	3.3693	5.9e-27	3.9e-26			AT1G63100	SCL28	-1.14429	3.76e-22	2.18e-21
AT3G02125	AT3G02125	3.36729	1.26e-06	3.62e-06			AT1G63600	CRRSP4	-1.711	0.00954219	0.0176468
AT5G62520	SRO5	3.3665	0	0			AT1G63710	CYP86A7	-2.64341	1.17e-06	3.39e-06
AT5G07330	AT5G07330	3.3649	1.67e-14	7.45e-14			AT1G64150	AT1G64150	-1.38778	1.71e-64	2.23e-63
AT1G61550	AT1G61550	3.3647	6.57e-85	1.11e-83			AT1G64170	CHX16	-2.02836	3.28e-84	5.52e-83
AT2G21900	WRKY59	3.36337	6.21e-13	2.59e-12			AT1G64290	AT1G64290	-2.89466	4.27e-05	0.000107627
AT2G03360	AT2G03360	3.36277	5.5e-23	3.27e-22			AT1G64355	AT1G64355	-1.24276	1.08e-31	8e-31
AT4G23600	CORI3	3.35685	0	0			AT1G64360	AT1G64360	-1.07971	3.75e-06	1.04e-05
AT4G39130	AT4G39130	3.35624	1.37e-06	3.94e-06			AT1G64390	AtGH9C2	-1.10624	5.45e-77	8.39e-76
AT1G61110	NAC025	3.35367	3.6e-08	1.17e-07			AT1G64400	LACS3	-1.20465	8.34e-31	6.06e-30
AT5G44430	PDF1.2C	3.35074	4.7e-135	1.32e-133			AT1G64480	CBL8	-1.04124	0.00426189	0.00834854
AT2G38905	AT2G38905	3.35018	1.43e-06	4.1e-06			AT1G64500	AT1G64500	-1.68572	1.24e-33	9.59e-33
AT3G46230	HSP17.4A	3.34522	1.89e-84	3.19e-83			AT1G64510	RPS6	-1.63806	3.41e-248	2.19e-246
AT4G23150	CRK7	3.34443	3.63e-08	1.17e-07			AT1G64590	AT1G64590	-1.09659	2.53e-06	7.1e-06
AT1G66600	WRKY63	3.34192	3.86e-24	2.38e-23			AT1G64640	ENODL8	-1.04112	4.73e-30	3.37e-29
AT3G44830	PDAT2	3.34094	1.04e-21	5.93e-21			AT1G64680	AT1G64680	-1.62731	6.53e-144	2e-142
AT1G59670	GSTU15	3.33371	1.74e-12	7.12e-12			AT1G64690	BLT	-1.65867	2.44e-11	9.44e-11
AT5G39130	AT5G39130	3.33107	2.66e-06	7.45e-06			AT1G64770	PNSB2	-1.86243	6.34e-188	2.75e-186
AT3G28580	AT3G28580	3.33033	8.08e-188	3.5e-186			AT1G64780	AMT1-2	-2.03226	1.17e-90	2.12e-89
AT1G18300	NUDT4	3.3243	0	0			AT1G64930	CYP89A7	-1.37161	4.66e-06	1.28e-05
AT1G60740	PRXIID	3.32423	4.97e-139	1.45e-137			AT1G65180	AT1G65180	-1.00815	0.001105	0.00235042
AT5G53870	ENODL1	3.31923	2.05e-130	5.51e-129			AT1G65190	AT1G65190	-2.8954	1.51e-282	1.21e-280
AT1G47510	AT5PTASE11	3.31886	6.97e-65	9.16e-64			AT1G65230	AT1G65230	-1.52786	1.33e-106	2.87e-105
AT1G65875	AT1G65875	3.30985	2.01e-06	5.69e-06			AT1G65310	XTH17	-1.14576	5.49e-14	2.4e-13
AT3G21830	ASK8	3.30554	2.19e-06	6.19e-06			AT1G65450	AT1G65450	-3.67617	1.18e-14	5.28e-14
AT1G70720	AT1G70720	3.30383	2.88e-22	1.68e-21			AT1G65480	FT	-1.10862	0.0277309	0.047132
AT3G45870	AT3G45870	3.3026	1.09e-42	1e-41			AT1G65590	HEXO3	-1.44057	1.29e-63	1.66e-62
AT4G04460	APA3	3.30038	0	0			AT1G65680	EXPB2	-1.60149	0.0188674	0.0331008
AT1G69920	GSTU12	3.2987	4.89e-26	3.17e-25			AT1G65710	AT1G65710	-1.01753	1.1e-08	3.66e-08
AT4G29780	AT4G29780	3.29625	0	0			AT1G65800	SD16	-2.3691	5.39e-251	3.59e-249
AT2G05400	AT2G05400	3.29571	2.36e-06	6.64e-06			AT1G65870	DIR21	-1.54329	0.00866669	0.0161264
AT5G64530	ANAC104	3.29464	5.9e-71	8.39e-70			AT1G66060	AT1G66060	-1.57258	0.0263097	0.0449139
AT5G42930	AT5G42930	3.29444	6.81e-81	1.1e-79			AT1G66100	AT1G66100	-1.18783	1.1e-21	6.3e-21
AT1G42560	MLO9	3.29408	4.63e-19	2.43e-18			AT1G66130	AT1G66130	-1.51654	1.71e-48	1.75e-47
AT1G29090	AT1G29090	3.29108	7.59e-33	5.76e-32			AT1G66190	AT1G66190	-1.51085	6.18e-13	2.58e-12
AT5G20690	PRK6	3.29	5.88e-07	1.74e-06			AT1G66230	MYB20	-1.34528	2.93e-09	1.01e-08
AT3G13433	AT3G13433	3.28994	1.29e-07	4.01e-07			AT1G66440	AT1G66440	-1.15481	0.00140056	0.00293974
AT2G21780	AT2G21780	3.28872	7.92e-08	2.5e-07			AT1G66460	AT1G66460	-1.51036	0.000213237	0.000497065
AT2G45570	CYP76C2	3.28788	8e-35	6.33e-34			AT1G66540	AT1G66540	-2.07946	3.91e-21	2.2e-20
AT1G71140	AT1G71140	3.28098	0	0			AT1G66725	MIR163	-3.26159	4.92e-22	2.84e-21
AT1G20730	AT1G20730	3.27629	2.71e-06	7.58e-06			AT1G66820	AT1G66820	-1.31914	1.93e-26	1.26e-25
AT5G52400	CYP715A1	3.27482	1.61e-07	4.97e-07			AT1G66890	AT1G66890	-1.35769	1.98e-30	1.43e-29
AT3G25655	IDL1	3.27451	1.14e-18	5.9e-18			AT1G66910	AT1G66910	-1.14358	1.38e-24	8.59e-24
AT3G29970	AT3G29970	3.27389	3.65e-91	6.64e-90			AT1G66920	AT1G66920	-1.17263	3.04e-21	1.71e-20
AT1G32940	SBT3.5	3.27236	1.77e-302	1.63e-300			AT1G66940	AT1G66940	-1.86003	2.52e-112	5.77e-111
AT3G19615	AT3G19615	3.27027	1.05e-09	3.73e-09			AT1G67035	AT1G67035	-1.25486	7.13e-05	0.000175481
AT3G61910	NAC066	3.26966	3.61e-11	1.39e-10			AT1G67090	RBCS-1A	-1.27851	0	0
AT3G13130	AT3G13130	3.26377	9.58e-29	6.6e-28			AT1G67195	MIR414	-1.41463	6.37e-23	3.78e-22
AT3G48840	AT3G48840	3.26227	6.92e-08	2.2e-07			AT1G67210	AT1G67210	-1.0862	7.53e-07	2.21e-06
AT2G02320	PP2B7	3.25587	3.27e-06	9.09e-06			AT1G67590	AT1G67590	-1.46759	1.19e-47	1.2e-46
AT1G20310	AT1G20310	3.25375	5.59e-51	5.94e-50			AT1G67660	AT1G67660	-1.65169	1.06e-48	1.09e-47
AT2G43510	ATTI1	3.2413	0	0			AT1G67700	HHL1	-1.53524	3.43e-129	9.17e-128
AT1G44130	AT1G44130	3.24088	1.57e-42	1.44e-41			AT1G67740	PSBY	-1.21821	2.15e-241	1.33e-239
AT1G54020	AT1G54020	3.23918	2.11e-169	8e-168			AT1G67820	AT1G67820	-1.10192	7.59e-06	2.04e-05
AT5G20230	BCB	3.23663	0	0			AT1G67830	FXG1	-1.86878	1e-49	1.04e-48
AT2G38250	GT-3B	3.23604	2.23e-146	6.97e-145			AT1G67840	CSK	-1.38546	7.72e-91	1.4e-89
AT5G37730	AT5G37730	3.23258	9.66e-09	3.24e-08			AT1G67860	AT1G67860	-1.40184	2.45e-36	2e-35
AT1G06135	AT1G06135	3.23207	3.78e-06	1.05e-05			AT1G67865	AT1G67865	-1.7813	5.77e-57	6.72e-56
AT5G52710	AT5G52710	3.23118	8.78e-25	5.5e-24			AT1G67870	AT1G67870	-1.4509	3.49e-253	2.34e-251
AT3G46680	UGT76E6	3.23022	2.48e-18	1.27e-17			AT1G67910	AT1G67910	-1.46222	3.72e-13	1.57e-12
AT5G59820	ZAT12	3.22776	0	0			AT1G68010	HPR	-1.85607	0	0
AT2G24850	TAT3	3.22549	0	0			AT1G68190	AT1G68190	-1.76116	8.41e-65	1.1e-63
AT3G21500	DXPS1	3.2168	0	0			AT1G68238	AT1G68238	-1.00392	1.68e-07	5.19e-07
AT5G66170	STR18	3.21623	0	0			AT1G68500	AT1G68500	-1.33543	1.62e-06	4.63e-06
AT1G48910	YUC10	3.21523	4.46e-06	1.23e-05			AT1G68520	COL6	-1.39856	3.65e-175	1.44e-173
AT2G25460	AT2G25460	3.21395	8.55e-159	2.96e-157			AT1G68540	TKPR2	-1.55627	8.15e-19	4.25e-18
AT1G19968	AT1G19968	3.21335	1.02e-08	3.42e-08			AT1G68585	AT1G68585	-1.09838	4.71e-10	1.71e-09
AT5G56300	GAMT2	3.2103	2.37e-21	1.34e-20			AT1G68590	AT1G68590	-1.74544	2.66e-133	7.34e-132
AT1G11170	AT1G11170	3.21016	0	0			AT1G68610	PCR11	-1.53473	0.0262986	0.0449011
AT1G48000	MYB112	3.20719	6.11e-56	7.01e-55			AT1G68800	TCP12	-1.66504	0.00977668	0.0180387
AT4G32810	CCD8	3.20701	2.13e-192	9.49e-191			AT1G68830	STN7	-1.26826	1.24e-107	2.69e-106
AT5G01900	WRKY62	3.20649	9.73e-10	3.46e-09			AT1G68880	AtbZIP	-2.10136	5.7e-15	2.6e-14
AT2G35300	LEA18	3.20409	2.44e-20	1.34e-19			AT1G68890	PHYLLO	-1.44993	2.97e-149	9.45e-148
AT4G30380	EGC1	3.20329	4.68e-06	1.28e-05			AT1G68935	AT1G68935	-2.28521	3.32e-14	1.47e-13
AT3G30180	CYP85A2	3.19645	0	0			AT1G68940	PUB42	-1.06297	3.29e-24	2.03e-23
AT2G27940	ATL57	3.19612	4.96e-06	1.36e-05			AT1G69120	AP1	-2.41787	0.000702249	0.00153446
AT2G37430	ZAT11	3.19577	6.93e-57	8.07e-56			AT1G69140	AT1G69140	-1.6957	0.0153954	0.0274213
AT4G04500	CRK37	3.1948	2.35e-10	8.64e-10			AT1G69200	FLN2	-1.63719	5.45e-171	2.09e-169
AT5G24640	AT5G24640	3.19403	2.27e-19	1.21e-18			AT1G69230	SP1L2	-2.86301	3.11e-19	1.64e-18
AT4G11655	AT4G11655	3.19354	2.29e-33	1.76e-32			AT1G69320	CLE10	-2.03809	0.000196368	0.000460125
AT1G02470	AT1G02470	3.18974	2.13e-74	3.18e-73			AT1G69523	AT1G69523	-1.91425	2.07e-36	1.69e-35
AT2G40790	CXXS2	3.1886	3.19e-27	2.12e-26			AT1G69830	AMY3	-1.05276	1.89e-120	4.66e-119
AT3G50930	BCS1	3.18731	0	0			AT1G70020	AT1G70020	-1.66871	0.000536893	0.00119228
AT1G58420	AT1G58420	3.18648	7.93e-58	9.38e-57			AT1G70070	ISE2	-1.5316	3.29e-112	7.49e-111
AT3G29260	SDR5	3.18647	5.51e-06	1.5e-05			AT1G70200	AT1G70200	-1.44789	6.71e-119	1.63e-117
AT2G38340	DREB2E	3.18644	8.39e-28	5.66e-27			AT1G70290	TPS8	-1.21825	8.07e-177	3.2e-175
AT4G03040	AT4G03040	3.18402	5.41e-06	1.48e-05			AT1G70410	BCA4	-1.31577	6.95e-178	2.79e-176
AT1G72260	THI2.1	3.18378	2.68e-63	3.44e-62			AT1G70430	AT1G70430	-1.18362	1.89e-07	5.8e-07
AT3G04300	AT3G04300	3.1835	4.17e-55	4.72e-54			AT1G70560	TAA1	-1.87231	7.35e-36	5.94e-35
AT2G36780	UGT73C3	3.1805	2.1e-179	8.52e-178			AT1G70580	GGAT2	-1.10369	3.22e-50	3.37e-49
AT1G30100	NCED5	3.17758	2.62e-08	8.56e-08			AT1G70700	TIFY7	-1.71162	4.33e-278	3.35e-276
AT4G23215	AT4G23215	3.17287	2.71e-31	1.99e-30			AT1G70760	ndhL	-2.57785	4.96e-283	4.05e-281
AT2G31425	AT2G31425	3.16917	6.41e-06	1.74e-05			AT1G70820	AT1G70820	-2.63535	0	0
AT1G26420	AT1G26420	3.16556	1.07e-78	1.69e-77			AT1G70850	MLP34	-3.04835	0	0
AT2G21930	AT2G21930	3.16118	8.74e-26	5.63e-25			AT1G70860	AT1G70860	-2.07653	0.000514768	0.00114613
AT1G60190	PUB19	3.15751	3.23e-32	2.42e-31			AT1G70880	AT1G70880	-4.32523	1.23e-14	5.54e-14
AT5G05300	AT5G05300	3.15741	1.84e-23	1.12e-22			AT1G70885	AT1G70885	-3.38812	3.57e-09	1.23e-08
AT3G53232	RTFL1	3.15516	2.15e-48	2.18e-47			AT1G71015	AT1G71015	-2.00077	3.29e-15	1.51e-14
AT4G29620	CDA2	3.14896	7.08e-06	1.91e-05			AT1G71020	PUB10	-1.34338	2.76e-73	4.04e-72
AT4G29570	CDA8	3.14808	1.32e-14	5.91e-14			AT1G71030	ATMYBL2	-2.5765	3.2e-183	1.35e-181
AT5G36925	AT5G36925	3.14773	3.25e-42	2.98e-41			AT1G71500	AT1G71500	-1.39226	4.37e-203	2.05e-201
AT4G37060	PLP5	3.14763	1.45e-09	5.13e-09			AT1G71720	AT1G71720	-1.32004	6.59e-75	9.83e-74
AT1G08860	BON3	3.14358	6.39e-12	2.55e-11			AT1G71866	EPFL7	-1.6658	0.00517499	0.00998403
AT3G25250	OXI1	3.14336	3.83e-128	1.01e-126			AT1G71870	AT1G71870	-1.06803	1.93e-13	8.21e-13
AT3G44870	AT3G44870	3.139	8.39e-51	8.89e-50			AT1G72416	AT1G72416	-1.18027	8.46e-39	7.23e-38
AT1G68620	CXE6	3.13812	1.44e-124	3.68e-123			AT1G72500	AT1G72500	-1.27676	6.51e-66	8.68e-65
AT2G39030	NATA1	3.13675	0	0			AT1G72610	GLP1	-1.88563	0	0
AT4G30430	TET9	3.13253	2.27e-30	1.63e-29			AT1G72645	AT1G72645	-1.18405	2.06e-29	1.44e-28
AT5G05420	FKBP15-3	3.13169	4.54e-76	6.88e-75			AT1G72970	HTH	-1.49897	1.73e-94	3.25e-93
AT3G21720	ICL	3.13154	0	0			AT1G73090	AT1G73090	-1.67969	2.89e-38	2.45e-37
AT1G62450	AT1G62450	3.13004	8.27e-06	2.22e-05			AT1G73290	scpl5	-1.47197	0.0253278	0.0433584
AT2G37025	TRFL8	3.12988	4.02e-114	9.3e-113			AT1G73330	ATDR4	-1.44878	9.86e-211	4.93e-209
AT3G28340	GATL10	3.12902	0	0			AT1G73360	HDG11	-1.06545	4.66e-06	1.28e-05
AT4G04490	CRK36	3.12436	1.02e-85	1.74e-84			AT1G73530	AT1G73530	-1.57151	2.95e-74	4.38e-73
AT3G09520	ATEXO70H4	3.12418	6.28e-69	8.69e-68			AT1G73600	NMT3	-5.662	0	0
AT1G53625	AT1G53625	3.11884	6.59e-48	6.68e-47			AT1G73602	CPuORF32	-1.93065	4.14e-10	1.51e-09
AT4G27654	AT4G27654	3.11822	2.13e-58	2.55e-57			AT1G73655	FKBP17-3	-1.25992	1.41e-75	2.13e-74
AT2G32460	MYB101	3.11786	4.84e-06	1.33e-05			AT1G73700	AT1G73700	-2.33607	6.14e-06	1.67e-05
AT3G46120	PAP19	3.1161	1.06e-06	3.06e-06			AT1G73830	BEE3	-1.92453	4.39e-58	5.21e-57
AT2G22880	AT2G22880	3.11598	3.58e-72	5.17e-71			AT1G73885	AT1G73885	-1.16534	9.21e-131	2.49e-129
AT2G23110	AT2G23110	3.11357	7.67e-06	2.07e-05			AT1G74055	AT1G74055	-1.40727	1.3e-06	3.74e-06
AT1G61340	AT1G61340	3.1131	1.3e-273	9.67e-272			AT1G74070	CYP26-2	-1.35139	4.04e-86	6.91e-85
AT1G05680	UGT74E2	3.10989	3.27e-188	1.43e-186			AT1G74090	SOT18	-1.33538	1e-118	2.43e-117
AT4G33420	PER47	3.10337	0	0			AT1G74300	AT1G74300	-1.20193	9.06e-08	2.85e-07
AT4G27670	HSP25.3	3.10097	4.63e-14	2.03e-13			AT1G74460	AT1G74460	-1.27072	7.07e-23	4.19e-22
AT3G04000	AT3G04000	3.10077	2.09e-216	1.09e-214			AT1G74730	AT1G74730	-1.37841	1.68e-69	2.34e-68
AT2G31980	CYS2	3.09657	2.55e-49	2.63e-48			AT1G74810	BOR5	-2.65609	0.000122214	0.000293334
AT4G04510	CRK38	3.09477	9.39e-10	3.35e-09			AT1G74850	PTAC2	-1.70895	1.81e-108	4e-107
AT2G15760	AT2G15760	3.08512	3.14e-115	7.31e-114			AT1G74880	ndhO	-1.8449	6.18e-205	2.94e-203
AT3G22250	UGT82A1	3.08164	9.95e-35	7.85e-34			AT1G74890	ARR15	-1.61619	0.00177027	0.00366512
AT1G28375	AT1G28375	3.07816	1.23e-05	3.27e-05			AT1G74970	RPS9	-1.74568	1.65e-280	1.29e-278
AT5G22540	AT5G22540	3.07639	3.05e-13	1.29e-12			AT1G75120	RRA1	-1.00747	3.3e-10	1.2e-09
AT3G48640	AT3G48640	3.0743	1.76e-08	5.82e-08			AT1G75160	AT1G75160	-1.49926	0.000375567	0.000850338
AT2G32190	AT2G32190	3.0734	6.34e-102	1.3e-100			AT1G75190	AT1G75190	-2.46967	2.13e-35	1.7e-34
AT5G07510	GRP14	3.06477	1.71e-05	4.47e-05			AT1G75240	ZHD5	-1.01461	7.41e-19	3.87e-18
AT2G41010	CAMBP25	3.06415	3.12e-256	2.12e-254			AT1G75300	AT1G75300	-1.9154	6.67e-10	2.4e-09
AT1G30700	AT1G30700	3.06215	1.16e-282	9.41e-281			AT1G75350	RPL31	-1.39898	8.96e-106	1.91e-104
AT2G41280	M10	3.06146	1.32e-05	3.48e-05			AT1G75360	AT1G75360	-1.40856	0.00170665	0.0035414
AT5G55750	AT5G55750	3.06063	1.11e-06	3.21e-06			AT1G75460	AT1G75460	-2.61467	0	0
AT5G63750	ARI13	3.05128	1.73e-21	9.85e-21			AT1G75550	AT1G75550	-1.82931	3.81e-07	1.14e-06
AT4G13700	ATPAP23	3.04963	6.73e-15	3.05e-14			AT1G75600	AT1G75600	-1.84923	0.00879483	0.0163538
AT1G66380	MYB114	3.04922	1.69e-10	6.3e-10			AT1G75690	LQY1	-1.37388	8.33e-146	2.58e-144
AT5G62490	HVA22B	3.04408	9.38e-09	3.15e-08			AT1G75880	EXL1	-1.79267	7.72e-23	4.58e-22
AT4G13310	CYP71A20	3.04286	5.9e-289	5.04e-287			AT1G75960	AAE8	-3.45757	2.53e-284	2.11e-282
AT4G13190	AT4G13190	3.04148	3.86e-51	4.13e-50			AT1G76080	CDSP32	-1.70884	0	0
AT5G55250	IAMT1	3.03968	9.41e-202	4.37e-200			AT1G76100	PETE	-1.32793	9.3e-145	2.87e-143
AT1G72240	AT1G72240	3.03353	2.27e-33	1.74e-32			AT1G76110	HMGB9	-1.34455	7.8e-24	4.75e-23
AT2G04515	AT2G04515	3.02966	7.12e-07	2.09e-06			AT1G76190	AT1G76190	-1.73862	0.000869034	0.00187687
AT5G13790	AGL15	3.02891	2.22e-207	1.07e-205			AT1G76450	PPD3	-1.07579	4.12e-78	6.46e-77
AT1G52690	AT1G52690	3.02679	3.26e-29	2.27e-28			AT1G76530	AT1G76530	-1.60897	0.0231391	0.0399193
AT1G48660	AT1G48660	3.02657	4.19e-52	4.54e-51			AT1G76570	AT1G76570	-1.04595	2.47e-10	9.1e-10
AT5G65100	EIL5	3.02599	1.8e-05	4.71e-05			AT1G76610	AT1G76610	-2.90189	1.69e-06	4.82e-06
AT1G71450	ERF021	3.02068	1.93e-06	5.47e-06			AT1G76952	IDL5	-3.33506	3.86e-10	1.4e-09
AT4G27810	AT4G27810	3.02018	4.06e-34	3.16e-33			AT1G77060	AT1G77060	-1.44552	8.8e-82	1.44e-80
AT1G50090	BCAT7	3.01925	6.3e-18	3.19e-17			AT1G77122	AT1G77122	-1.31965	4.01e-30	2.87e-29
AT4G09595	AT4G09595	3.01764	1.85e-05	4.82e-05			AT1G77200	ERF037	-1.88124	4.28e-08	1.38e-07
AT5G43570	AT5G43570	3.0157	2.94e-22	1.71e-21			AT1G77210	STP14	-2.77539	2.55e-127	6.66e-126
AT1G56150	SAUR71	3.01278	1.59e-63	2.05e-62			AT1G77400	AT1G77400	-1.34475	2.55e-09	8.86e-09
AT2G06660	AT2G06660	3.0105	2.02e-05	5.24e-05			AT1G77490	APXT	-1.27978	3.54e-88	6.2e-87
AT1G63210	AT1G63210	3.00868	1.99e-05	5.17e-05			AT1G77520	AT1G77520	-2.66929	9.59e-15	4.32e-14
AT4G31760	PER46	3.00856	2.89e-09	1e-08			AT1G77700	AT1G77700	-1.16555	1.65e-06	4.72e-06
AT3G14360	AT3G14360	3.00676	0	0			AT1G77960	AT1G77960	-3.61904	1.03e-27	6.96e-27
AT1G73805	SARD1	3.00573	1.27e-219	6.74e-218			AT1G78020	AT1G78020	-1.95301	2.05e-133	5.68e-132
AT3G26830	CYP71B15	3.00277	0	0			AT1G78030	AT1G78030	-2.57945	8.58e-06	2.3e-05
AT1G75750	GASA1	2.99538	3.47e-133	9.55e-132			AT1G78120	TPR12	-1.97819	2.36e-58	2.82e-57
AT4G18690	AT4G18690	2.99321	2.2e-05	5.7e-05			AT1G78180	AT1G78180	-1.50064	8.66e-36	6.98e-35
AT2G23640	RTNLB13	2.99217	2.31e-05	5.96e-05			AT1G78290	SRK2C	-1.25861	2.72e-09	9.43e-09
AT4G30290	XTH19	2.99049	0	0			AT1G78440	GA2OX1	-3.28162	2.61e-06	7.33e-06
AT2G42990	AT2G42990	2.98956	2.86e-13	1.21e-12			AT1G78450	AT1G78450	-1.93535	4.94e-36	4.01e-35
AT1G76960	AT1G76960	2.98501	4.42e-223	2.42e-221			AT1G78580	TPS1	-1.10385	3.41e-45	3.3e-44
AT1G80865	AT1G80865	2.98306	2.41e-05	6.22e-05			AT1G78630	RPL13	-1.59559	0	0
AT2G47050	AT2G47050	2.98007	3.21e-17	1.59e-16			AT1G78750	AT1G78750	-1.0596	0.000512481	0.00114186
AT3G57260	BG2	2.97564	6.69e-235	3.97e-233			AT1G78815	LSH7	-2.20608	2e-11	7.79e-11
AT1G22810	ERF019	2.9733	2.04e-07	6.25e-07			AT1G78820	AT1G78820	-3.27786	4.9e-171	1.88e-169
AT5G25470	AT5G25470	2.97267	2.66e-43	2.49e-42			AT1G78915	AT1G78915	-1.27568	4.81e-60	5.93e-59
AT5G63087	AT5G63087	2.97219	6.3e-14	2.75e-13			AT1G78950	BAS	-1.03217	4.88e-05	0.000122178
AT1G02930	GSTF6	2.96376	0	0			AT1G78970	LUP1	-1.18326	1.79e-46	1.77e-45
AT5G55370	AT2	2.96233	7.93e-11	3e-10			AT1G78990	AT1G78990	-3.61478	5.7e-34	4.42e-33
AT3G58780	AGL1	2.95293	4.34e-51	4.63e-50			AT1G78995	AT1G78995	-2.96508	8.77e-134	2.44e-132
AT1G04250	IAA17	2.95132	0	0			AT1G79040	PSBR	-1.10779	8.86e-99	1.75e-97
AT3G56891	AT3G56891	2.95076	2.66e-18	1.36e-17			AT1G79130	SAUR40	-1.55241	0.0248638	0.0426277
AT4G21680	NPF7.2	2.95001	0	0			AT1G79250	AGC1-7	-1.73698	5.87e-05	0.000145529
AT1G66370	MYB113	2.94038	3.84e-21	2.16e-20			AT1G79270	ECT8	-1.56654	3.67e-53	4.03e-52
AT1G13609	AT1G13609	2.93644	5.67e-24	3.47e-23			AT1G79410	2025-10-05	-1.26584	4.74e-23	2.83e-22
AT3G10815	AT3G10815	2.93579	5.87e-59	7.08e-58			AT1G79510	AT1G79510	-1.33876	3.61e-27	2.4e-26
AT2G02340	PP2B8	2.93577	9.84e-06	2.63e-05			AT1G79529	AT1G79529	-1.70495	0.00173345	0.00359218
AT5G27200	ACP5	2.93373	2.11e-08	6.92e-08			AT1G79560	FTSH12	-1.03472	5.88e-77	9.05e-76
AT5G07310	ERF115	2.92919	1.34e-14	6e-14			AT1G79600	AT1G79600	-1.13731	4.41e-78	6.9e-77
AT1G68765	IDA	2.92683	2.62e-12	1.06e-11			AT1G79700	AT1G79700	-2.41202	1.27e-53	1.4e-52
AT5G14602	AT5G14602	2.92544	3.57e-06	9.89e-06			AT1G79840	GL2	-1.08372	1.87e-14	8.35e-14
AT5G45830	DOG1	2.92437	2.64e-138	7.69e-137			AT1G79850	RPS17	-1.60174	7.12e-251	4.73e-249
AT1G61810	BGLU45	2.92395	3.74e-55	4.24e-54			AT1G80310	MOT2	-1.12123	3.31e-36	2.7e-35
AT1G07400	HSP17.8	2.92101	9.81e-181	4.04e-179			AT1G80340	GA3OX2	-1.07708	0.00385167	0.00759239
AT1G06080	ADS1	2.92017	4.63e-214	2.37e-212			AT1G80380	GLYK	-1.35574	3.7e-206	1.77e-204
AT1G52890	NAC019	2.91333	1.18e-218	6.22e-217			AT1G80440	AT1G80440	-1.88893	1.21e-233	7.13e-232
AT4G26440	WRKY34	2.91243	4.21e-06	1.16e-05			AT1G80480	PTAC17	-1.07668	1.54e-86	2.65e-85
AT5G11210	ATGLR2.5	2.91156	1.5e-17	7.48e-17			AT1G80630	AT1G80630	-1.17326	3.44e-16	1.64e-15
AT5G59170	AT5G59170	2.91094	5.96e-26	3.85e-25			AT1G80650	RTL1	-1.04075	4.37e-14	1.92e-13
AT1G01560	MPK11	2.90459	1.7e-47	1.71e-46			AT1G80730	ZFP1	-1.6706	0.0068979	0.0130309
AT2G46770	NAC043	2.90452	2.44e-11	9.44e-11			AT1G80770	PDE318	-1.28429	4.93e-57	5.76e-56
AT1G51020	AT1G51020	2.89982	7.85e-13	3.26e-12			AT1G80920	ATJ8	-1.0261	4.96e-80	7.95e-79
AT1G02230	NAC004	2.89696	1.25e-19	6.7e-19			AT2G01110	TATC	-1.16445	1.42e-107	3.09e-106
AT1G26560	BGLU40	2.89511	0	0			AT2G01290	RPI2	-1.26827	1.3e-48	1.33e-47
AT4G28190	ULT1	2.89353	5.48e-206	2.62e-204			AT2G01400	AT2G01400	-1.1601	3.25e-09	1.12e-08
AT3G29252	AT3G29252	2.88879	3.76e-06	1.04e-05			AT2G01520	MLP328	-3.767	1.82e-248	1.17e-246
AT2G27080	AT2G27080	2.88829	0	0			AT2G01530	MLP329	-1.80877	1.41e-56	1.63e-55
AT3G51560	AT3G51560	2.88766	2.52e-18	1.29e-17			AT2G01590	CRR3	-2.33276	3.74e-150	1.2e-148
AT3G52970	CYP76G1	2.88709	4.5e-05	0.000113044			AT2G01755	AT2G01755	-1.55469	4.1e-26	2.66e-25
AT4G22235	AT4G22235	2.88573	7.74e-142	2.32e-140			AT2G01870	AT2G01870	-1.76986	1.13e-44	1.09e-43
AT2G25150	SCT	2.88211	6.45e-41	5.77e-40			AT2G01900	AT2G01900	-2.86634	1.51e-50	1.59e-49
AT4G01535	AT4G01535	2.87961	4.73e-05	0.000118633			AT2G01918	PQL3	-2.24234	3.93e-34	3.06e-33
AT4G25580	AT4G25580	2.87264	3.1e-07	9.37e-07			AT2G02020	NPF8.4	-1.8551	6.51e-45	6.29e-44
AT5G38750	AT5G38750	2.872	2.6e-20	1.42e-19			AT2G02060	AT2G02060	-1.04082	3.29e-07	9.94e-07
AT2G18660	EGC2	2.87173	5.18e-100	1.04e-98			AT2G02500	ISPD	-1.05522	1.55e-28	1.06e-27
AT3G29000	CML30	2.86953	2.92e-136	8.34e-135			AT2G02540	ZHD3	-1.16774	1.31e-05	3.46e-05
AT1G80580	ERF084	2.86728	4.76e-05	0.000119222			AT2G02740	WHY3	-1.15051	3.5e-44	3.35e-43
AT1G34650	HDG10	2.86652	1.76e-05	4.61e-05			AT2G02950	PKS1	-2.05314	2.52e-90	4.54e-89
AT4G33720	AT4G33720	2.86324	0	0			AT2G02980	PCMP-H26	-1.06271	1.06e-08	3.54e-08
AT1G02850	BGLU11	2.85899	0	0			AT2G03020	AT2G03020	-1.74326	0.00584123	0.0111693
AT3G54420	ATEP3	2.85863	8.05e-251	5.33e-249			AT2G03260	PHO1-H2	-1.24576	7.09e-07	2.08e-06
AT5G22810	AT5G22810	2.85826	1.18e-09	4.19e-09			AT2G03310	AT2G03310	-2.05413	9.82e-46	9.6e-45
AT1G13340	AT1G13340	2.8579	1.13e-241	7.04e-240			AT2G03410	AT2G03410	-2.84555	1.73e-40	1.53e-39
AT5G64190	AT5G64190	2.85471	2.34e-51	2.51e-50			AT2G03420	AT2G03420	-2.2234	1.36e-149	4.36e-148
AT4G04710	CPK22	2.84907	6.27e-16	2.95e-15			AT2G03440	NRP1	-2.20774	2.03e-297	1.82e-295
AT1G21525	AT1G21525	2.84675	1.14e-26	7.47e-26			AT2G03550	CXE7	-2.76793	2.89e-196	1.32e-194
AT4G10250	HSP22.0	2.84488	2.81e-27	1.87e-26			AT2G03720	MRH6	-1.25929	4.76e-10	1.72e-09
AT3G28510	AT3G28510	2.83868	1.93e-21	1.09e-20			AT2G03750	SOT11	-1.20462	1.76e-57	2.07e-56
AT4G09820	TT8	2.83793	4.12e-90	7.37e-89			AT2G04032	ZIP7	-4.78686	2.9e-20	1.58e-19
AT5G51790	BHLH120	2.83788	3.1e-61	3.87e-60			AT2G04039	AT2G04039	-1.38896	1.56e-46	1.54e-45
AT1G24140	AT1G24140	2.82997	7.89e-135	2.21e-133			AT2G04080	DTXL3	-1.06407	9.35e-23	5.53e-22
AT5G59680	AT5G59680	2.82443	4.35e-99	8.68e-98			AT2G04160	AIR3	-1.21973	6.6e-86	1.13e-84
AT5G10220	ANN6	2.82346	2.64e-08	8.63e-08			AT2G04190	AT2G04190	-2.71957	0.000130104	0.000310794
AT1G68630	PCR12	2.82343	2.32e-05	5.98e-05			AT2G04270	RNE	-1.45677	2.77e-76	4.21e-75
AT1G30730	AT1G30730	2.82179	7.5e-119	1.81e-117			AT2G04360	AT2G04360	-1.00234	2.62e-38	2.22e-37
AT4G02360	AT4G02360	2.82106	1.44e-68	1.99e-67			AT2G04570	AT2G04570	-1.6927	1.68e-49	1.74e-48
AT2G22860	PSK2	2.81984	1.05e-105	2.23e-104			AT2G04680	AT2G04680	-1.01934	0.000119097	0.000286324
AT1G26380	AT1G26380	2.81879	9.07e-89	1.6e-87			AT2G04790	AT2G04790	-1.66394	9.44e-28	6.36e-27
AT4G23560	AtGH9B15	2.81845	5.19e-08	1.66e-07			AT2G04842	EMB2761	-1.30207	6.15e-108	1.35e-106
AT4G12470	AZI1	2.81246	0	0			AT2G05100	LHCB2.1	-1.27655	1.94e-271	1.42e-269
AT2G33580	LYK5	2.80958	1.02e-268	7.27e-267			AT2G05440	ATGRP9	-1.70084	7.94e-201	3.66e-199
AT1G05880	ARI12	2.80852	2.31e-05	5.96e-05			AT2G06200	GRF6	-1.05996	0.00346065	0.00686477
AT2G47520	ERF071	2.80769	1.44e-217	7.53e-216			AT2G06520	PSBX	-1.29943	2.59e-86	4.45e-85
AT1G72660	DRG2	2.80689	2.05e-48	2.08e-47			AT2G07680	ATMRP11	-1.20728	1.13e-31	8.38e-31
AT4G04760	AT4G04760	2.80612	7.24e-54	8.04e-53			AT2G10940	AT2G10940	-1.29055	8.72e-84	1.46e-82
AT2G28860	CYP710A4	2.80607	8.57e-45	8.27e-44			AT2G11150	AT2G11150	-3.20775	2.57e-12	1.04e-11
AT5G17340	AT5G17340	2.80553	5.33e-61	6.64e-60			AT2G12190	AT2G12190	-2.89709	4.12e-15	1.89e-14
AT3G21850	ASK9	2.80417	1.13e-10	4.22e-10			AT2G12460	AT2G12460	-1.5944	0.000900612	0.00194135
AT1G50735	SADHU8-1	2.8022	7.83e-05	0.000192025			AT2G12462	AT2G12462	-2.16242	2.63e-34	2.05e-33
AT1G32880	AT1G32880	2.80081	4.74e-08	1.52e-07			AT2G13360	AGT1	-1.85771	0	0
AT4G05030	AT4G05030	2.79993	7.91e-05	0.000193997			AT2G14080	AT2G14080	-1.76673	1.03e-74	1.54e-73
AT5G65165	SDH2-3	2.79551	1.13e-15	5.26e-15			AT2G14510	AT2G14510	-2.12986	2.76e-09	9.58e-09
AT5G24355	AT5G24355	2.79471	6.06e-05	0.000150146			AT2G14660	AT2G14660	-1.37556	2.76e-08	8.98e-08
AT2G42560	AT2G42560	2.79236	7.95e-05	0.000194782			AT2G14760	BHLH84	-2.84188	6.14e-05	0.000151953
AT5G05490	SYN1	2.78978	9.24e-24	5.63e-23			AT2G14860	AT2G14860	-1.56659	4.32e-17	2.13e-16
AT1G66390	MYB90	2.78879	4.33e-54	4.83e-53			AT2G14880	AT2G14880	-1.24395	1.12e-76	1.71e-75
AT1G77655	AT1G77655	2.78446	4.45e-06	1.22e-05			AT2G15080	AtRLP19	-1.8119	6.1e-61	7.61e-60
AT1G20180	AT1G20180	2.78209	2.18e-07	6.66e-07			AT2G15090	KCS8	-3.23889	0	0
AT5G65510	AIL7	2.77963	1.04e-95	1.98e-94			AT2G15620	NIR1	-2.12533	0	0
AT1G63820	AT1G63820	2.77457	8.87e-53	9.71e-52			AT2G15810	AT2G15810	-1.60961	0.00468106	0.00910127
AT2G17660	AT2G17660	2.77321	4.23e-09	1.45e-08			AT2G15820	OTP51	-1.21774	1.55e-42	1.43e-41
AT5G52640	HSP81-1	2.77187	0	0			AT2G15890	MEE14	-1.07602	6.01e-123	1.51e-121
AT1G33770	AT1G33770	2.75918	2.12e-11	8.23e-11			AT2G15970	COR413PM1	-1.47145	6.75e-192	2.99e-190
AT2G47770	TSPO	2.75481	1.58e-05	4.14e-05			AT2G16270	AT2G16270	-1.01495	7.05e-12	2.8e-11
AT5G12030	HSP17.7	2.75345	5.77e-56	6.62e-55			AT2G16365	AT2G16365	-1.01091	1.65e-48	1.69e-47
AT3G21090	ABCG15	2.75344	6.59e-185	2.79e-183			AT2G16367	AT2G16367	-1.95764	0.00572227	0.0109579
AT1G66855	AT1G66855	2.75287	0.000106654	0.000257709			AT2G16760	AT2G16760	-1.45137	1.17e-06	3.39e-06
AT1G66400	CML23	2.75224	6.94e-110	1.55e-108			AT2G17033	AT2G17033	-1.21965	2.51e-59	3.05e-58
AT5G13330	ERF113	2.75103	3.09e-175	1.22e-173			AT2G17055	AT2G17055	-1.68298	0.0135165	0.0243514
AT1G02310	MAN1	2.74987	2.63e-40	2.32e-39			AT2G17240	AT2G17240	-1.13082	4.1e-39	3.53e-38
AT2G36770	UGT73C4	2.74971	2.24e-105	4.74e-104			AT2G17300	AT2G17300	-1.54817	1.36e-20	7.52e-20
AT2G44840	ERF13	2.74733	4.32e-159	1.5e-157			AT2G17450	ATL44	-1.05878	5.24e-38	4.42e-37
AT5G45630	AT5G45630	2.74302	1.56e-37	1.3e-36			AT2G17695	AT2G17695	-1.42167	8.53e-49	8.73e-48
AT4G32170	CYP96A2	2.74084	0.00011677	0.000281056			AT2G17880	AT2G17880	-2.06929	4.78e-55	5.4e-54
AT5G05430	AT5G05430	2.73715	4.57e-50	4.77e-49			AT2G17972	AT2G17972	-1.61463	5.73e-37	4.72e-36
AT5G46350	WRKY8	2.7362	2.25e-39	1.94e-38			AT2G18190	AT2G18190	-1.94642	1.97e-05	5.12e-05
AT1G63870	AT1G63870	2.73614	4.97e-06	1.36e-05			AT2G18300	HBI1	-2.81369	1.38e-267	9.81e-266
AT1G56060	AT1G56060	2.73345	2.69e-21	1.52e-20			AT2G18328	RL4	-2.55395	1.19e-28	8.18e-28
AT3G62990	AT3G62990	2.73219	5.78e-06	1.57e-05			AT2G18350	ZHD6	-1.49615	1.64e-13	7.03e-13
AT2G42430	LBD16	2.72652	2.6e-83	4.33e-82			AT2G18380	GATA20	-1.38035	9.27e-08	2.91e-07
AT2G43000	JUB1	2.72478	1.33e-44	1.28e-43			AT2G18470	PERK4	-3.79177	1.47e-17	7.37e-17
AT3G21520	DMP1	2.72336	1.29e-55	1.48e-54			AT2G18480	PLT3	-1.80839	6.16e-12	2.46e-11
AT1G10585	AT1G10585	2.72293	1.04e-48	1.06e-47			AT2G18550	ATHB-21	-1.51194	0.024892	0.0426729
AT1G21360	GLTP2	2.7178	9.27e-52	1e-50			AT2G18560	AT2G18560	-2.59386	1.1e-55	1.26e-54
AT1G80840	WRKY40	2.71186	0	0			AT2G18710	SCY1	-1.31453	1.09e-152	3.58e-151
AT1G52130	JAL13	2.70972	3.11e-13	1.31e-12			AT2G18940	AT2G18940	-1.62078	2.47e-59	3.01e-58
AT4G26950	AT4G26950	2.70942	1.89e-33	1.46e-32			AT2G18969	AT2G18969	-1.70972	3.12e-07	9.44e-07
AT5G28263	AT5G28263	2.70916	1.07e-69	1.49e-68			AT2G19150	PME10	-1.99443	0.000232817	0.000540318
AT2G28210	ATACA2	2.70653	6.05e-49	6.22e-48			AT2G19800	MIOX2	-1.3974	1.85e-47	1.86e-46
AT3G60100	CSY5	2.70607	0.000142874	0.000339922			AT2G19870	AT2G19870	-1.13295	1.44e-53	1.59e-52
AT1G33030	AT1G33030	2.70439	2.06e-29	1.44e-28			AT2G19960	AT2G19960	-1.42206	0.0211509	0.0367762
AT3G58400	AT3G58400	2.70306	0.000143335	0.000340954			AT2G19990	PR-1-LIKE	-1.31227	6.92e-08	2.2e-07
AT4G16563	AT4G16563	2.70201	1.02e-235	6.11e-234			AT2G20020	CAF1	-1.30829	3.4e-75	5.1e-74
AT3G23460	AT3G23460	2.70073	4.11e-07	1.23e-06			AT2G20030	ATL12	-1.18234	0.00437337	0.00855135
AT2G02310	PP2B6	2.69883	9.47e-12	3.74e-11			AT2G20100	BHLH133	-1.20182	5.66e-12	2.26e-11
AT2G46660	CYP78A6	2.69417	1.8e-71	2.57e-70			AT2G20180	PIF1	-1.77396	5.88e-61	7.33e-60
AT4G15280	UGT71B5	2.69227	3.72e-46	3.65e-45			AT2G20250	AT2G20250	-1.17308	4.03e-06	1.11e-05
AT1G67000	AT1G67000	2.68955	7.18e-32	5.34e-31			AT2G20260	PSAE2	-1.1458	5.99e-94	1.12e-92
AT1G02920	GSTF7	2.68558	0	0			AT2G20340	ELI5	-1.02349	6.39e-20	3.45e-19
AT5G65230	AtMYB53	2.68467	2.07e-30	1.49e-29			AT2G20520	FLA6	-2.38806	1.84e-21	1.05e-20
AT1G47400	AT1G47400	2.68464	2.45e-47	2.46e-46			AT2G20670	AT2G20670	-1.79552	0	0
AT3G56790	AT3G56790	2.68368	7.76e-09	2.62e-08			AT2G20870	AT2G20870	-1.62644	0.0190165	0.0333529
AT4G14130	XTH15	2.67723	9.32e-274	6.97e-272			AT2G20875	EPF1	-1.45581	6.15e-05	0.000152323
AT2G26150	HSFA2	2.67412	1.47e-195	6.68e-194			AT2G21045	STR19	-1.24885	4.28e-38	3.62e-37
AT4G20095	AT4G20095	2.66907	5.75e-05	0.000142849			AT2G21140	PRP2	-3.84986	9.58e-234	5.64e-232
AT4G37720	PSK4	2.66837	0.00017665	0.000416122			AT2G21185	AT2G21185	-1.43871	0.00179626	0.00371458
AT4G02330	PME41	2.66292	0	0			AT2G21200	AT2G21200	-1.83527	0.00502207	0.00971549
AT3G59710	AT3G59710	2.65696	6.49e-136	1.85e-134			AT2G21210	AT2G21210	-3.64954	4.3e-78	6.73e-77
AT4G22100	BGLU3	2.65525	0.000156114	0.00036983			AT2G21280	GC1	-1.39569	2.03e-76	3.1e-75
AT1G48800	TPS28	2.64809	3.05e-11	1.18e-10			AT2G21330	FBA1	-1.29431	9.82e-130	2.63e-128
AT3G18250	AT3G18250	2.64703	3.76e-15	1.73e-14			AT2G21370	XK-1	-2.77807	9.74e-118	2.32e-116
AT2G32200	AT2G32200	2.64356	2.94e-24	1.81e-23			AT2G21385	AT2G21385	-1.17478	4.83e-70	6.78e-69
AT1G20132	AT1G20132	2.64285	0.000204873	0.000478964			AT2G21530	AT2G21530	-1.33379	3.13e-124	7.97e-123
AT4G16740	TPS03	2.63844	6.14e-23	3.65e-22			AT2G21650	RL2	-4.95752	1.07e-86	1.84e-85
AT4G23610	AT4G23610	2.63731	8.59e-10	3.07e-09			AT2G21860	AT2G21860	-1.25283	5.92e-85	1e-83
AT5G18450	DREB2G	2.63656	0.000212604	0.000495776			AT2G21880	RABG2	-1.81453	3.35e-17	1.65e-16
AT4G27652	AT4G27652	2.63637	4.88e-97	9.4e-96			AT2G21890	CAD3	-1.64094	0.00318336	0.00634929
AT3G46660	UGT76E12	2.63129	0.000225722	0.000524292			AT2G22190	TPPE	-2.35263	3.93e-65	5.17e-64
AT5G38540	JAL43	2.62966	4.02e-70	5.65e-69			AT2G22200	ERF056	-2.85643	1.48e-14	6.6e-14
AT1G66160	PUB20	2.62956	2.27e-296	2.02e-294			AT2G22360	AT2G22360	-1.25363	3.45e-50	3.6e-49
AT5G42800	DFRA	2.62671	0	0			AT2G22540	SVP	-1.30953	1.42e-80	2.29e-79
AT2G44460	BGLU28	2.62317	0	0			AT2G22590	UGT91A1	-2.49425	1.54e-06	4.39e-06
AT3G09120	AT3G09120	2.62207	8.28e-05	0.000202484			AT2G22610	AT2G22610	-1.02495	4.58e-18	2.33e-17
AT5G64890	PEP2	2.6204	3.65e-17	1.8e-16			AT2G22650	AT2G22650	-1.35126	5.06e-19	2.65e-18
AT5G47550	CYS5	2.62018	4.01e-249	2.6e-247			AT2G22870	EMB2001	-1.07674	1.62e-31	1.19e-30
AT2G14560	LURP1	2.61891	0	0			AT2G22890	FAD4L2	-2.23363	3.65e-16	1.74e-15
AT1G04490	AT1G04490	2.61433	3.81e-36	3.1e-35			AT2G22920	SCPL12	-1.83236	1.25e-29	8.84e-29
AT3G24900	AtRLP39	2.61367	2.29e-05	5.91e-05			AT2G22980	SCPL13	-1.56962	5.55e-73	8.09e-72
AT5G09970	CYP78A7	2.60979	3.36e-30	2.4e-29			AT2G22990	SCPL8	-2.90347	0	0
AT5G05365	AT5G05365	2.60957	1.8e-88	3.17e-87			AT2G23010	SCPL9	-1.60107	7.37e-39	6.3e-38
AT5G57390	AIL5	2.60673	2.28e-84	3.84e-83			AT2G23390	AT2G23390	-1.0869	1.65e-65	2.19e-64
AT1G33730	CYP76C5	2.6044	1.82e-05	4.74e-05			AT2G23590	MES8	-1.46663	3.56e-10	1.3e-09
AT1G65970	PRXIIC	2.60231	5.28e-190	2.31e-188			AT2G23600	MES2	-2.23484	4.82e-258	3.33e-256
AT1G68390	AT1G68390	2.60217	3.15e-56	3.63e-55			AT2G23610	MES3	-1.31721	5.22e-84	8.76e-83
AT1G12070	AT1G12070	2.60181	3.01e-17	1.49e-16			AT2G23672	AT2G23672	-1.64436	0.0110897	0.020277
AT1G30190	AT1G30190	2.60139	2.64e-08	8.63e-08			AT2G23840	AT2G23840	-2.15267	1.1e-53	1.22e-52
AT5G52680	AT5G52680	2.60134	9.96e-05	0.000241482			AT2G24030	AT2G24030	-1.03158	0.00708383	0.0133526
AT5G52300	LTI65	2.60119	3.34e-11	1.29e-10			AT2G24060	AT2G24060	-1.46547	1.5e-98	2.97e-97
AT3G12502	AT3G12502	2.60107	4.89e-16	2.32e-15			AT2G24090	AT2G24090	-1.44648	9.06e-131	2.45e-129
AT2G23170	GH3.3	2.60099	4.77e-44	4.54e-43			AT2G24120	RPOT3	-1.10969	1e-77	1.56e-76
AT4G18650	AT4G18650	2.59851	0.000264353	0.000609451			AT2G24540	AFR	-1.35576	0.000356604	0.000809697
AT2G03850	AT2G03850	2.5985	1.68e-08	5.55e-08			AT2G24545	AT2G24545	-1.1743	0.0054868	0.0105372
AT3G11150	AT3G11150	2.59746	4.11e-46	4.04e-45			AT2G24580	AT2G24580	-1.17625	6.05e-37	4.99e-36
AT3G03230	AT3G03230	2.59389	0.000102571	0.000248262			AT2G24692	AT2G24692	-2.94534	3.05e-05	7.78e-05
AT1G13755	AT1G13755	2.59296	0.00027284	0.000627966			AT2G24710	GLR2.3	-2.3339	0.000525555	0.00116888
AT1G55230	AT1G55230	2.59264	0.000183895	0.000432575			AT2G24720	GLR2.2	-2.15537	0.00165915	0.00345004
AT2G01770	VIT1	2.59219	8.09e-05	0.00019804			AT2G24980	AT2G24980	-1.55113	5.09e-50	5.31e-49
AT3G44320	NIT3	2.59182	0	0			AT2G25060	ENODL14	-1.09846	1.56e-21	8.91e-21
AT3G12220	SCPL16	2.59176	1.96e-23	1.18e-22			AT2G25080	GPX1	-1.51968	7.32e-183	3.06e-181
AT1G73510	AT1G73510	2.59113	0.000276847	0.000636539			AT2G25090	CIPK16	-1.11098	5.53e-07	1.64e-06
AT4G23060	IQD22	2.5888	2.33e-149	7.44e-148			AT2G25160	CYP82F1	-1.09673	1.55e-11	6.05e-11
AT2G31420	AT2G31420	2.58772	7.85e-07	2.3e-06			AT2G25240	AT2G25240	-1.01525	2.6e-13	1.1e-12
AT1G54570	AT1G54570	2.58615	0	0			AT2G25410	ATL22	-1.94244	0.00611445	0.011654
AT3G26200	CYP71B22	2.58356	0	0			AT2G25830	AT2G25830	-1.24798	1.95e-86	3.34e-85
AT1G77640	ERF013	2.58291	6.49e-80	1.04e-78			AT2G25840	OVA4	-1.0943	1.38e-58	1.66e-57
AT3G13437	AT3G13437	2.58202	2.3e-44	2.2e-43			AT2G25880	AtAUR2	-1.3086	4.01e-20	2.18e-19
AT5G51760	AHG1	2.58189	9.92e-07	2.88e-06			AT2G25900	ATCTH	-2.00635	3.64e-157	1.25e-155
AT3G14362	DVL19	2.58049	1.62e-29	1.14e-28			AT2G26211	MIR825A	-1.43818	0.010397	0.0191037
AT4G31000	CBP60F	2.58008	0	0			AT2G26215	AT2G26215	-1.33673	1.33e-06	3.81e-06
AT2G44470	BGLU29	2.57849	0.00030222	0.000691859			AT2G26420	PIP5K3	-1.12639	5.97e-07	1.77e-06
AT5G12340	AT5G12340	2.57807	1.72e-52	1.88e-51			AT2G26500	AT2G26500	-1.28935	3.55e-26	2.3e-25
AT5G41750	AT5G41750	2.57779	0	0			AT2G26520	AT2G26520	-1.67391	1.12e-05	2.99e-05
AT4G22233	AT4G22233	2.57682	9.93e-14	4.29e-13			AT2G26550	HO2	-1.13687	8.74e-22	5.01e-21
AT1G80130	AT1G80130	2.5762	0	0			AT2G26695	AT2G26695	-2.23005	6.73e-34	5.21e-33
AT2G24800	PER18	2.57303	1.06e-13	4.59e-13			AT2G26820	PP2A3	-1.93594	5.73e-10	2.06e-09
AT5G09980	PEP4	2.57212	5.33e-93	9.85e-92			AT2G26930	ISPE	-1.34852	1.66e-73	2.45e-72
AT4G28405	AT4G28405	2.57094	0.000308509	0.000705538			AT2G26940	AT2G26940	-1.56236	0.0241053	0.0414246
AT5G37420	AT5G37420	2.5707	2.79e-10	1.02e-09			AT2G27402	AT2G27402	-2.66422	1.1e-145	3.39e-144
AT3G21352	AT3G21352	2.56941	3.1e-11	1.19e-10			AT2G27420	AT2G27420	-3.77758	3.28e-08	1.06e-07
AT1G57650	AT1G57650	2.56616	0.000101498	0.000245801			AT2G27535	AT2G27535	-2.42459	6.05e-10	2.18e-09
AT2G35730	AT2G35730	2.56445	4.5e-26	2.91e-25			AT2G27740	AT2G27740	-1.04721	7.64e-06	2.06e-05
AT2G14960	GH3.1	2.5599	2.2e-27	1.47e-26			AT2G27920	SCPL51	-2.16651	2.29e-55	2.6e-54
AT1G68240	BHLH109	2.55938	8.23e-16	3.87e-15			AT2G27930	AT2G27930	-1.10247	0.00248744	0.00503793
AT1G75450	CKX5	2.55822	1.44e-88	2.54e-87			AT2G28000	CPN60A1	-1.13519	3.02e-232	1.76e-230
AT3G63380	ACA12	2.55626	9.86e-178	3.95e-176			AT2G28056	MIR172A	-1.80435	0.0104105	0.0191256
AT4G39670	AT4G39670	2.55186	6.22e-63	7.96e-62			AT2G28105	AT2G28105	-1.18508	0.000967541	0.00207586
AT2G36695	AT2G36695	2.55166	3.23e-07	9.76e-07			AT2G28160	FIT	-1.97364	7.45e-13	3.1e-12
AT2G47950	AT2G47950	2.55146	2e-42	1.84e-41			AT2G28250	NCRK	-1.73394	2.5e-53	2.76e-52
AT1G28370	ERF11	2.54985	7.42e-169	2.8e-167			AT2G28270	AT2G28270	-2.21735	0.0018707	0.00385372
AT3G19500	BHLH113	2.54906	6.39e-36	5.17e-35			AT2G28305	LOG1	-2.09213	1.3e-42	1.2e-41
AT5G01100	AT5G01100	2.54749	1.26e-51	1.35e-50			AT2G28410	AT2G28410	-1.47448	9.73e-18	4.89e-17
AT1G53980	AT1G53980	2.54671	1.9e-08	6.24e-08			AT2G28580	AT2G28580	-4.53765	3.49e-16	1.66e-15
AT2G32140	AT2G32140	2.54555	1.88e-43	1.77e-42			AT2G28605	PPD2	-1.51847	5.89e-47	5.86e-46
AT1G71890	SUC5	2.54397	3.53e-54	3.94e-53			AT2G28720	AT2G28720	-1.95348	9.25e-111	2.08e-109
AT3G12830	SAUR72	2.53597	3.27e-104	6.86e-103			AT2G28780	AT2G28780	-1.42143	3.89e-24	2.39e-23
AT5G25250	FLOT1	2.5354	3.82e-143	1.16e-141			AT2G28800	ALB3	-1.03243	1.5e-123	3.8e-122
AT1G18350	MKK7	2.53316	1.63e-12	6.7e-12			AT2G28870	AT2G28870	-1.05114	0.000156913	0.000371647
AT2G36220	AT2G36220	2.52731	9.98e-228	5.62e-226			AT2G28950	EXPA6	-1.34934	4.06e-125	1.04e-123
AT2G30020	AT2G30020	2.5232	0	0			AT2G28970	AT2G28970	-1.83486	3.35e-09	1.16e-08
AT3G12580	MED37C	2.52163	0	0			AT2G28990	AT2G28990	-1.61124	6.53e-17	3.19e-16
AT1G66500	PCFS1	2.51935	6.64e-143	2.01e-141			AT2G29000	AT2G29000	-1.78806	0.0001072	0.000258953
AT4G10265	AT4G10265	2.51648	5.7e-37	4.7e-36			AT2G29010	AT2G29010	-2.47302	1.03e-13	4.44e-13
AT4G25200	HSP23.6	2.51464	1.52e-29	1.06e-28			AT2G29120	GLR2.7	-2.1347	2.13e-38	1.81e-37
AT1G67610	AT1G67610	2.51367	1.71e-26	1.11e-25			AT2G29130	LAC2	-2.17399	7.23e-06	1.95e-05
AT1G60730	AT1G60730	2.51232	0	0			AT2G29160	AT2G29160	-2.64874	9.44e-05	0.000229382
AT5G64080	AT5G64080	2.51181	0	0			AT2G29165	AT2G29165	-3.44624	5.67e-10	2.04e-09
AT1G53540	HSP17.6C	2.51072	1.72e-16	8.28e-16			AT2G29170	AT2G29170	-3.76477	2.13e-27	1.43e-26
AT1G19900	AT1G19900	2.50823	3.79e-80	6.08e-79			AT2G29180	AT2G29180	-1.25878	3.97e-27	2.64e-26
AT4G31380	FLP1	2.50601	6.27e-07	1.85e-06			AT2G29290	AT2G29290	-2.50954	8.94e-195	4.06e-193
AT4G28530	anac074	2.50111	1.49e-24	9.25e-24			AT2G29300	AT2G29300	-1.90192	3.14e-34	2.45e-33
AT5G44700	GSO2	2.50044	3.3e-35	2.63e-34			AT2G29310	AT2G29310	-2.00819	1.81e-132	4.95e-131
AT3G59260	AT3G59260	2.49968	0.000456553	0.00102246			AT2G29320	AT2G29320	-1.92979	1.5e-96	2.87e-95
AT5G48410	GLR1.3	2.49003	8.65e-36	6.98e-35			AT2G29360	SDR	-1.70669	1.67e-94	3.14e-93
AT2G38823	AT2G38823	2.48762	7e-29	4.84e-28			AT2G29370	AT2G29370	-3.47485	7.82e-13	3.25e-12
AT2G26692	AT2G26692	2.48678	3.12e-06	8.7e-06			AT2G29650	ANTR1	-1.91789	6.83e-193	3.05e-191
AT3G47720	SRO4	2.4809	3.25e-22	1.89e-21			AT2G29660	AT2G29660	-1.00483	6.07e-19	3.18e-18
AT4G24570	PUMP4	2.47896	0	0			AT2G29730	UGT71D1	-1.15582	2.04e-20	1.12e-19
AT5G44350	AT5G44350	2.47881	5.12e-66	6.83e-65			AT2G30010	TBL45	-1.77171	4.43e-118	1.06e-116
AT5G56060	AT5G56060	2.47845	0.000512917	0.00114273			AT2G30100	AT2G30100	-1.47736	3.44e-37	2.85e-36
AT1G80590	WRKY66	2.47632	0.000517182	0.00115119			AT2G30150	UGT87A1	-1.26931	2.85e-20	1.56e-19
AT2G38490	CIPK22	2.47578	1.37e-11	5.35e-11			AT2G30170	AT2G30170	-1.34514	3.66e-47	3.66e-46
AT4G14370	AT4G14370	2.47458	2.09e-117	4.97e-116			AT2G30210	LAC3	-1.07798	1.29e-19	6.91e-19
AT4G31950	CYP82C3	2.47425	0.000143748	0.000341738			AT2G30362	AT2G30362	-2.59377	8.62e-05	0.000210469
AT1G58330	ZW2	2.47107	2.66e-07	8.1e-07			AT2G30390	FC2	-1.44452	1.86e-150	5.98e-149
AT5G42530	AT5G42530	2.47039	3e-280	2.34e-278			AT2G30420	ETC2	-1.04256	0.0216509	0.0375375
AT5G18270	ANAC087	2.47033	4.75e-242	2.95e-240			AT2G30570	PSBW	-1.39167	1.1e-116	2.6e-115
AT5G62480	GSTU9	2.46763	2.14e-116	5.03e-115			AT2G30600	AT2G30600	-1.20663	1.3e-177	5.2e-176
AT4G34320	AT4G34320	2.46205	6.32e-36	5.12e-35			AT2G30615	AT2G30615	-3.16047	3.34e-16	1.59e-15
AT3G43250	AT3G43250	2.46027	0.000558132	0.0012369			AT2G30695	AT2G30695	-1.24138	7.65e-45	7.39e-44
AT2G20142	AT2G20142	2.45793	8.24e-99	1.64e-97			AT2G30790	PSBP2	-1.00149	2.63e-07	7.99e-07
AT4G03290	CML6	2.45663	0.000574107	0.00126969			AT2G30820	AT2G30820	-1.34715	2.09e-06	5.91e-06
AT4G39700	AT4G39700	2.45389	9.14e-29	6.29e-28			AT2G30900	TBL43	-2.07204	0.00357803	0.00708213
AT1G70130	LECRK52	2.4528	1.23e-11	4.82e-11			AT2G30950	FTSH2	-1.18206	2.3e-219	1.22e-217
AT2G21820	AT2G21820	2.45182	6.84e-07	2.01e-06			AT2G31040	AT2G31040	-1.32314	2.52e-166	9.33e-165
AT3G56275	AT3G56275	2.44943	3.31e-18	1.69e-17			AT2G31083	CLE5	-2.0325	0.0014768	0.0030898
AT5G65300	AT5G65300	2.44863	1.94e-40	1.71e-39			AT2G31170	SYCO ARATH	-1.06074	7.22e-37	5.95e-36
AT5G44460	CML43	2.44147	6.56e-72	9.42e-71			AT2G31310	LBD14	-2.1796	0.000751143	0.00163609
AT5G58840	AT5G58840	2.43596	4.11e-05	0.000103826			AT2G31380	BBX25	-1.20834	7.79e-14	3.38e-13
AT4G12210	AT4G12210	2.43361	0.000647411	0.00142002			AT2G31400	GUN1	-1.19365	1.84e-159	6.41e-158
AT5G64750	ABR1	2.43281	3.09e-13	1.31e-12			AT2G31540	AT2G31540	-1.72681	0.0149993	0.0267755
AT1G51035	AT1G51035	2.43206	2.09e-10	7.72e-10			AT2G31790	UGT74C1	-1.62512	1.18e-136	3.39e-135
AT1G64820	AT1G64820	2.4305	0.000285296	0.000654754			AT2G31840	AT2G31840	-1.17644	1.26e-49	1.31e-48
AT1G14630	AT1G14630	2.42973	4.43e-70	6.22e-69			AT2G31890	ATRAP	-1.11064	1.89e-57	2.23e-56
AT4G14365	XBAT34	2.42902	1.35e-231	7.81e-230			AT2G31940	AT2G31940	-1.20777	0.00684174	0.0129347
AT3G28770	AT3G28770	2.42792	3.72e-18	1.9e-17			AT2G32010	CVL1	-1.05718	1.22e-18	6.32e-18
AT1G13530	AT1G13530	2.4279	3.18e-29	2.21e-28			AT2G32100	OFP16	-2.86192	3.84e-62	4.85e-61
AT2G17470	ALMT6	2.42563	6.89e-31	5.02e-30			AT2G32160	AT2G32160	-1.63343	1.59e-15	7.38e-15
AT1G15415	AT1G15415	2.4245	1.94e-07	5.96e-07			AT2G32179	AT2G32179	-1.58823	3.72e-10	1.35e-09
AT2G43530	ATTI3	2.42412	2.64e-74	3.93e-73			AT2G32180	PTAC18	-1.58011	2.12e-60	2.63e-59
AT1G68568	AT1G68568	2.42364	0.00014686	0.000348836			AT2G32230	PRORP1	-1.92465	5.38e-202	2.5e-200
AT2G19770	PRO4	2.42198	0.000238655	0.000552882			AT2G32290	BAM6	-2.02653	0.00449494	0.00877245
AT1G56250	VBF	2.4214	5.29e-37	4.37e-36			AT2G32390	GLR3.5	-1.4194	4.31e-30	3.08e-29
AT5G40990	GLIP1	2.41772	0.000580338	0.00128255			AT2G32430	B3GALT3	-1.14805	5.75e-14	2.51e-13
AT1G44090	GA20OX5	2.41503	0.000327075	0.000746344			AT2G32480	ARASP	-1.47318	4.67e-91	8.48e-90
AT1G69430	AT1G69430	2.41501	8.11e-20	4.36e-19			AT2G32500	AT2G32500	-1.63319	5.91e-48	6e-47
AT1G79680	WAKL10	2.41384	2e-38	1.7e-37			AT2G32530	CSLB3	-2.41633	6.22e-43	5.77e-42
AT1G62420	AT1G62420	2.4137	8.37e-27	5.5e-26			AT2G32540	CSLB4	-2.64442	9.81e-54	1.09e-52
AT3G48520	CYP94B3	2.41259	1.99e-67	2.72e-66			AT2G32590	CAPH	-1.18583	5.86e-15	2.66e-14
AT4G18425	AT4G18425	2.40735	2.9e-58	3.46e-57			AT2G32640	AT2G32640	-1.13946	1.36e-44	1.31e-43
AT3G48650	AT3G48650	2.40599	4.6e-31	3.36e-30			AT2G32650	AT2G32650	-1.06273	8.34e-37	6.86e-36
AT1G63030	DREB1E	2.40597	0.000746815	0.00162738			AT2G32770	PAP13	-1.64009	0.000206903	0.0004833
AT4G28365	ENODL3	2.40496	5.67e-05	0.000140857			AT2G32860	BGLU33	-1.38552	3.32e-59	4.02e-58
AT2G33520	AT2G33520	2.40108	2.14e-07	6.57e-07			AT2G32880	AT2G32880	-2.21875	2.86e-54	3.19e-53
AT1G26730	PHO1-H7	2.40085	4.27e-131	1.16e-129			AT2G33175	AT2G33175	-2.06764	0.00364833	0.00721568
AT5G28510	BGLU24	2.39943	2.01e-18	1.04e-17			AT2G33180	AT2G33180	-2.12807	1.52e-93	2.84e-92
AT4G22214	AT4G22214	2.39932	5.04e-74	7.46e-73			AT2G33430	MORF2	-1.30287	1.22e-123	3.11e-122
AT5G66700	ATHB-53	2.39801	4.1e-15	1.88e-14			AT2G33450	RPL28	-1.4043	5.84e-129	1.56e-127
AT3G49130	AT3G49130	2.39771	4.04e-07	1.21e-06			AT2G33750	PUP2	-3.42854	1.56e-08	5.17e-08
AT3G21351	AT3G21351	2.39598	7.03e-83	1.16e-81			AT2G33790	AGP30	-1.61763	8.24e-23	4.89e-22
AT5G24130	AT5G24130	2.39549	0.000787712	0.00170973			AT2G33800	RPS5	-1.56906	0	0
AT2G41070	DPBF4	2.39128	9.7e-212	4.88e-210			AT2G33810	SPL3	-2.57302	1.36e-16	6.57e-16
AT5G49520	WRKY48	2.39086	1.29e-144	3.98e-143			AT2G33830	AT2G33830	-1.46663	2.82e-103	5.85e-102
AT5G19110	AT5G19110	2.38955	5.4e-223	2.95e-221			AT2G33850	AT2G33850	-3.28426	4.12e-236	2.48e-234
AT1G24110	PER6	2.38757	0.00082036	0.00177655			AT2G33855	AT2G33855	-1.66618	7.19e-41	6.42e-40
AT2G43520	ATTI2	2.38752	8.01e-80	1.28e-78			AT2G34010	AT2G34010	-2.93728	2.05e-14	9.11e-14
AT4G30140	CDEF1	2.38503	0	0			AT2G34180	CIPK13	-1.5122	6.69e-14	2.92e-13
AT1G55525	AT1G55525	2.38475	1.15e-05	3.06e-05			AT2G34430	LHB1B1	-1.84474	0	0
AT5G24915	AT5G24915	2.38455	0.000772353	0.0016786			AT2G34510	AT2G34510	-1.42318	2.79e-66	3.74e-65
AT1G14755	AT1G14755	2.38186	0.000844338	0.0018256			AT2G34600	TIFY 5B	-1.53085	8.15e-28	5.5e-27
AT3G15740	AT3G15740	2.37876	0.00065831	0.00144316			AT2G34610	AT2G34610	-1.99746	2.59e-06	7.27e-06
AT1G15040	AT1G15040	2.37797	0	0			AT2G34620	AT2G34620	-1.87437	1.47e-105	3.12e-104
AT5G61160	ACT	2.37218	4.85e-147	1.52e-145			AT2G34640	PTAC12	-1.7761	6.78e-203	3.17e-201
AT1G13480	AT1G13480	2.37186	7.29e-16	3.43e-15			AT2G34655	AT2G34655	-1.4607	7.32e-06	1.97e-05
AT5G14860	AT5G14860	2.36509	0.000494957	0.0011055			AT2G34860	EDA3	-1.2332	2.54e-78	4e-77
AT5G45070	PP2A8	2.36449	4.22e-62	5.32e-61			AT2G34960	CAT5	-1.99712	8.87e-10	3.16e-09
AT1G74000	SSL11	2.36437	8.44e-70	1.18e-68			AT2G35130	AT2G35130	-2.3149	1.9e-55	2.16e-54
AT2G02250	PP2B2	2.36435	1.57e-11	6.14e-11			AT2G35150	EXL7	-2.40831	2.44e-13	1.04e-12
AT1G14950	AT1G14950	2.36345	0.000445984	0.000999631			AT2G35210	AGD10	-1.40651	0.000210638	0.000491467
AT1G05550	AT1G05550	2.3612	4.2e-05	0.000105934			AT2G35260	AT2G35260	-1.28546	4.64e-162	1.67e-160
AT4G04540	CRK39	2.35716	5.83e-10	2.1e-09			AT2G35340	MEE29	-1.62391	4.31e-13	1.81e-12
AT5G44630	BS	2.35661	0.00095834	0.00205755			AT2G35370	GDH1	-1.82719	1.85e-282	1.49e-280
AT5G16960	AT5G16960	2.35533	1.05e-07	3.27e-07			AT2G35390	PRS1	-1.01261	1.04e-39	9.1e-39
AT1G80390	IAA15	2.35508	0.000482431	0.0010782			AT2G35410	AT2G35410	-1.3977	1.08e-157	3.71e-156
AT3G46613	RTFL4	2.35444	0.000968785	0.00207817			AT2G35500	SKL2	-1.44617	1.01e-110	2.27e-109
AT2G32130	AT2G32130	2.35208	0.000148	0.000351443			AT2G35570	AT2G35570	-2.89765	1.79e-15	8.31e-15
AT5G16460	AT5G16460	2.35173	0.00098193	0.0021051			AT2G35742	AT2G35742	-1.61583	0.00539843	0.0103763
AT4G02700	SULTR3	2.34925	1.74e-155	5.89e-154			AT2G35760	AT2G35760	-1.43564	4.7e-20	2.55e-19
AT4G15975	ATL17	2.34647	6.86e-87	1.19e-85			AT2G35800	AT2G35800	-1.04966	1.03e-54	1.16e-53
AT1G21240	WAK3	2.34626	1.3e-25	8.3e-25			AT2G35830	AT2G35830	-1.22762	4.78e-55	5.4e-54
AT2G17330	CYP51G2	2.34532	2.53e-27	1.69e-26			AT2G35960	NHL12	-3.99989	5.25e-20	2.84e-19
AT5G39170	AT5G39170	2.34438	0.00101857	0.00217856			AT2G36000	AT2G36000	-1.19443	1.67e-64	2.19e-63
AT1G01480	ACS2	2.34402	3.31e-22	1.93e-21			AT2G36050	OFP15	-1.58582	3.2e-18	1.64e-17
AT3G51860	CAX3	2.34329	0	0			AT2G36295	AT2G36295	-1.65667	0.000565573	0.00125216
AT3G49380	iqd15	2.34314	1.85e-17	9.24e-17			AT2G36400	GRF3	-1.25184	6e-45	5.81e-44
AT5G46010	AT5G46010	2.34309	0.00102486	0.00219124			AT2G36430	AT2G36430	-3.261	9.66e-87	1.67e-85
AT1G10220	AT1G10220	2.34136	1.05e-08	3.52e-08			AT2G36540	AT2G36540	-1.45623	0.0230247	0.0397386
AT4G15755	AT4G15755	2.33817	0.000978174	0.00209741			AT2G36570	PXC1	-1.10957	5.07e-53	5.56e-52
AT3G28210	SAP12	2.33766	2.65e-59	3.21e-58			AT2G36590	PROT3	-4.26661	5.29e-18	2.68e-17
AT5G54300	AT5G54300	2.3376	4.75e-173	1.85e-171			AT2G36710	PME15	-1.77448	0.0115907	0.0211463
AT1G21250	WAK1	2.33546	0	0			AT2G36790	UGT73C6	-1.24407	5.87e-27	3.88e-26
AT2G15765	AT2G15765	2.33486	0.00106734	0.00227587			AT2G36792	AT2G36792	-2.0271	3.94e-10	1.43e-09
AT5G03668	AT5G03668	2.33214	1.9e-07	5.85e-07			AT2G36870	XTH32	-2.13713	3.34e-82	5.48e-81
AT1G68450	VQ8	2.33026	1.58e-17	7.91e-17			AT2G36990	SIGF	-1.78737	7.08e-129	1.89e-127
AT2G17845	AT2G17845	2.33009	1.18e-10	4.42e-10			AT2G37210	LOG3	-1.0315	0.0203076	0.0354042
AT1G64070	RLM1	2.32786	0.000540634	0.00119995			AT2G37220	CP29B	-1.61791	0	0
AT5G33395	AT5G33395	2.32655	3.97e-06	1.1e-05			AT2G37450	AT2G37450	-1.89617	1.35e-47	1.36e-46
AT1G15050	IAA34	2.32537	0.000783693	0.00170146			AT2G37460	AT2G37460	-2.38924	3.63e-83	6.03e-82
AT4G34470	ASK12	2.32492	0.00106145	0.0022642			AT2G37580	ATL33	-1.19962	6.01e-11	2.29e-10
AT2G26130	AT2G26130	2.32372	0.000844424	0.00182563			AT2G37590	DOF2.4	-1.18455	6.36e-06	1.73e-05
AT1G62580	AT1G62580	2.32313	5.1e-44	4.85e-43			AT2G37640	EXPA3	-1.48458	2.44e-88	4.29e-87
AT4G30270	XTH24	2.32308	0	0			AT2G37660	AT2G37660	-1.51259	0	0
AT3G11165	AT3G11165	2.32289	0.000781978	0.00169803			AT2G37950	AT2G37950	-2.77374	6.84e-17	3.34e-16
AT3G02800	AT3G02800	2.32257	2.55e-41	2.29e-40			AT2G38010	AT2G38010	-1.27777	1.51e-39	1.31e-38
AT5G09720	MRS2-8	2.32173	1.05e-07	3.28e-07			AT2G38140	RPS31	-1.55362	1.42e-87	2.47e-86
AT5G20045	AT5G20045	2.3208	1.54e-16	7.44e-16			AT2G38152	AT2G38152	-1.38301	0.00943524	0.0174686
AT5G55620	AT5G55620	2.32073	1e-234	5.9e-233			AT2G38210	PDX1L4	-1.01032	1.07e-24	6.71e-24
AT3G49340	AT3G49340	2.32027	0.000205248	0.000479796			AT2G38230	PDX11	-1.01483	8.1e-78	1.27e-76
AT5G39670	CML45	2.31988	1.77e-90	3.18e-89			AT2G38270	GRXS16	-1.03233	2.23e-55	2.54e-54
AT2G27389	AT2G27389	2.31706	1.43e-25	9.15e-25			AT2G38300	AT2G38300	-2.36299	2.83e-34	2.21e-33
AT3G25780	AOC3	2.31306	0	0			AT2G38330	DTX44	-1.1919	6.39e-34	4.95e-33
AT5G42830	AT5G42830	2.31149	1.14e-94	2.14e-93			AT2G38465	AT2G38465	-1.14224	1.5e-10	5.58e-10
AT5G25930	AT5G25930	2.31089	1.47e-225	8.18e-224			AT2G38540	LTP1	-1.47943	1.82e-116	4.27e-115
AT2G34650	PID	2.30973	1.41e-77	2.2e-76			AT2G38995	AT2G38995	-5.1539	1.47e-16	7.1e-16
AT3G49120	PER34	2.30716	0	0			AT2G39040	PER24	-3.04364	7.91e-22	4.54e-21
AT1G05800	DGL	2.30699	0.000619321	0.00136253			AT2G39240	AT2G39240	-3.01222	2.91e-06	8.12e-06
AT4G18210	PUP10	2.30466	1.06e-106	2.28e-105			AT2G39250	SNZ	-4.76113	3.42e-52	3.72e-51
AT1G56040	PUB58	2.30274	0.00124865	0.00263742			AT2G39400	AT2G39400	-1.2748	2.39e-41	2.15e-40
AT1G54760	AGL85	2.30222	0.00102813	0.00219787			AT2G39470	PNSL1	-1.92866	2.85e-181	1.18e-179
AT1G68170	AT1G68170	2.30214	1.05e-06	3.03e-06			AT2G39510	AT2G39510	-2.17642	5.32e-57	6.21e-56
AT5G18470	AT5G18470	2.30189	3.08e-177	1.23e-175			AT2G39670	AT2G39670	-1.31062	4.14e-112	9.43e-111
AT2G18210	AT2G18210	2.29995	1.95e-62	2.48e-61			AT2G39730	RCA	-1.74176	0	0
AT2G45080	CYCU2-1	2.29787	2.54e-40	2.24e-39			AT2G39920	AT2G39920	-1.77695	3.34e-36	2.72e-35
AT3G45660	NPF2.6	2.29614	3.52e-23	2.11e-22			AT2G40020	AT2G40020	-1.16663	1.29e-21	7.35e-21
AT4G37850	BHLH25	2.29451	1.29e-36	1.06e-35			AT2G40080	ELF4	-1.22449	1.05e-40	9.38e-40
AT3G28155	AT3G28155	2.29367	0.00123718	0.0026154			AT2G40130	AT2G40130	-2.3334	3.14e-30	2.25e-29
AT5G23840	AT5G23840	2.29288	5.11e-127	1.33e-125			AT2G40300	FER4	-1.77732	3.04e-155	1.02e-153
AT3G23240	ERF1B	2.29115	3.98e-43	3.71e-42			AT2G40350	DREB2H	-1.95255	0.00515442	0.00994899
AT4G16730	TPS02	2.2905	0.00132167	0.00278311			AT2G40435	AT2G40435	-1.43691	1.01e-06	2.93e-06
AT4G25490	DREB1B	2.29003	6.19e-09	2.1e-08			AT2G40460	NPF5.1	-1.85253	2.69e-78	4.23e-77
AT4G15210	BAM5	2.28911	0	0			AT2G40480	AT2G40480	-1.5228	4.79e-29	3.32e-28
AT4G30540	AT4G30540	2.28828	0.00133971	0.00281894			AT2G40490	HEME2	-1.58647	9.41e-286	7.9e-284
AT1G67645	AT1G67645	2.28768	9.61e-08	3.02e-07			AT2G40520	AT2G40520	-1.89971	1.25e-38	1.06e-37
AT3G44350	NAC061	2.28322	1.86e-05	4.84e-05			AT2G40610	EXPA8	-2.8257	7.18e-76	1.09e-74
AT5G60310	LECRK110	2.28239	2.69e-19	1.42e-18			AT2G40670	ARR16	-1.47493	1.3e-05	3.44e-05
AT1G62530	AT1G62530	2.27965	2.9e-06	8.1e-06			AT2G40920	AT2G40920	-1.19165	3.29e-35	2.62e-34
AT5G41290	CRRSP58	2.27899	1.73e-10	6.43e-10			AT2G40960	AT2G40960	-1.20016	7.29e-13	3.04e-12
AT5G52670	AT5G52670	2.27609	0.00138571	0.00291078			AT2G41560	ACA4	-1.48446	1.94e-169	7.36e-168
AT3G47480	CML47	2.27573	7.85e-56	8.98e-55			AT2G41680	NTRC	-1.39831	3.91e-110	8.77e-109
AT5G45090	PP2A7	2.2755	3.25e-07	9.83e-07			AT2G41720	EMB2654	-1.26771	6.21e-77	9.54e-76
AT4G22880	LDOX	2.27541	1.99e-185	8.51e-184			AT2G41950	AT2G41950	-1.65857	5.52e-37	4.56e-36
AT4G31877	MIR156C	2.27316	1.05e-23	6.39e-23			AT2G41990	AT2G41990	-1.17661	8.06e-09	2.72e-08
AT1G72760	AT1G72760	2.27196	3.89e-07	1.17e-06			AT2G42070	NUDT23	-1.03115	1.43e-32	1.07e-31
AT5G65550	UGT91B1	2.27148	7.87e-07	2.31e-06			AT2G42200	SPL9	-1.26628	5.2e-08	1.66e-07
AT1G09960	SUC4	2.27059	3.42e-257	2.34e-255			AT2G42220	STR9	-1.14158	2.33e-109	5.18e-108
AT3G26819	MIR169N	2.26962	0.00146449	0.00306611			AT2G42530	COR15B	-4.73454	1.17e-23	7.11e-23
AT5G48400	GLR1.2	2.26933	2.23e-09	7.77e-09			AT2G42540	COR15A	-3.01496	2.32e-111	5.24e-110
AT4G11650	OSM34	2.26096	0	0			AT2G42690	AT2G42690	-1.64733	8.57e-207	4.12e-205
AT3G09940	MDHAR	2.25996	0	0			AT2G42800	AtRLP29	-1.37313	5.6e-07	1.66e-06
AT3G05020	ACP1	2.25848	0	0			AT2G42850	CYP718	-1.44831	2.55e-10	9.36e-10
AT5G10120	EIL4	2.25677	0.00150619	0.00314757			AT2G42900	AT2G42900	-2.97668	5.95e-33	4.52e-32
AT1G72540	AT1G72540	2.25653	1.47e-27	9.83e-27			AT2G42940	AHL16	-1.61892	0.0113435	0.0207137
AT1G21870	GONST5	2.25103	0.00159878	0.00333178			AT2G42975	AT2G42975	-1.27284	1.71e-12	7.03e-12
AT2G29930	AT2G29930	2.2509	0.00159976	0.00333328			AT2G42980	AT2G42980	-1.30452	0.00439748	0.00859511
AT3G28600	AT3G28600	2.24951	2.14e-09	7.47e-09			AT2G43010	PIF4	-1.0038	2.35e-38	2e-37
AT2G22500	PUMP5	2.24914	0	0			AT2G43030	RPL3A	-1.53251	1.97e-306	1.85e-304
AT3G45960	EXLA3	2.24689	1.73e-37	1.44e-36			AT2G43440	AT2G43440	-5.28968	8.22e-18	4.14e-17
AT3G09010	AT3G09010	2.2465	1.35e-71	1.94e-70			AT2G43550	ATTI6	-2.89071	5.47e-204	2.58e-202
AT3G13640	ABCE1	2.24528	2.3e-25	1.46e-24			AT2G43560	FKBP16-3	-1.63504	9.98e-170	3.8e-168
AT3G05770	AT3G05770	2.24217	5.2e-15	2.37e-14			AT2G43590	AT2G43590	-1.09906	1.05e-60	1.31e-59
AT2G47600	MHX	2.24125	0	0			AT2G43670	AT2G43670	-1.19202	0.00110638	0.00235296
AT4G23110	AT4G23110	2.24077	0.00167904	0.00348878			AT2G43800	FH2	-1.16645	2.03e-28	1.38e-27
AT5G37540	AT5G37540	2.23914	1.75e-155	5.91e-154			AT2G43910	HOL1	-1.24153	2.12e-184	8.96e-183
AT1G62290	APA2	2.2389	0	0			AT2G43920	HOL2	-2.6633	3.12e-61	3.9e-60
AT1G23150	AT1G23150	2.23808	8.78e-106	1.87e-104			AT2G44040	DAPB1	-1.15227	1.63e-50	1.72e-49
AT5G16980	AT5G16980	2.23549	4.49e-202	2.09e-200			AT2G44230	AT2G44230	-3.12591	6.51e-143	1.97e-141
AT1G30660	T5I8.11	2.23255	1.01e-11	3.98e-11			AT2G44340	VQ18	-2.30218	0.000222549	0.000517358
AT1G06520	GPAT1	2.23072	4.13e-30	2.95e-29			AT2G44570	AtGH9B12	-2.1621	4.25e-06	1.17e-05
AT2G31180	ATMYB14	2.23054	5.26e-30	3.75e-29			AT2G44640	AT2G44640	-1.52714	2.63e-119	6.4e-118
AT1G32710	AT1G32710	2.22833	0.0017768	0.00367709			AT2G44650	CHL-CPN10	-1.27119	3.11e-12	1.26e-11
AT3G20940	CYP705A30	2.22809	3.32e-148	1.05e-146			AT2G44920	AT2G44920	-2.03093	4.25e-119	1.03e-117
AT2G17850	STR17	2.22523	9.13e-71	1.29e-69			AT2G44930	AT2G44930	-2.82632	1.21e-11	4.77e-11
AT3G59930	AT3G59930	2.22481	3.95e-56	4.56e-55			AT2G44990	CCD7	-1.7415	0.013235	0.0238876
AT3G60170	AT3G60170	2.22349	4.2e-23	2.51e-22			AT2G45270	GCP1	-1.24447	1.24e-42	1.14e-41
AT5G45570	AT5G45570	2.22287	0.00138493	0.00290963			AT2G45350	CRR4	-1.6622	8.97e-07	2.61e-06
AT5G62400	AT5G62400	2.22267	0.00115775	0.00245609			AT2G45470	FLA8	-1.49093	4.56e-69	6.33e-68
AT4G01985	AT4G01985	2.2175	1.08e-26	7.07e-26			AT2G45560	CYP76C1	-2.86863	3.36e-181	1.39e-179
AT4G10860	AT4G10860	2.21469	0.00189252	0.00389641			AT2G45600	CXE8	-2.33795	1.05e-14	4.73e-14
AT1G43640	TULP5	2.21429	0.000169312	0.000399563			AT2G45660	SOC1	-1.51424	1.5e-44	1.44e-43
AT1G14540	PER4	2.21114	4.87e-16	2.31e-15			AT2G45770	CPFTSY	-1.48295	1.15e-87	2e-86
AT1G08165	AT1G08165	2.20996	2.35e-30	1.69e-29			AT2G45800	PLIM2A	-1.91505	0.00462034	0.00899522
AT1G35140	EXL1	2.20989	0	0			AT2G46100	AT2G46100	-1.52437	1.25e-72	1.82e-71
AT1G19380	AT1G19380	2.20983	7.71e-146	2.39e-144			AT2G46530	ARF11	-1.16383	2.35e-10	8.65e-10
AT3G14225	GLIP4	2.20763	0.000145941	0.000346819			AT2G46650	CYTB5-C	-1.132	7.9e-44	7.49e-43
AT4G02520	GSTF2	2.2075	0	0			AT2G46690	SAUR32	-1.38384	9.26e-36	7.46e-35
AT1G21620	APUM20	2.2072	0.00196111	0.00402758			AT2G46810	BHLH70	-1.03944	1.64e-16	7.91e-16
AT4G16620	AT4G16620	2.20658	5.44e-33	4.14e-32			AT2G46820	CURT1B	-1.61466	8.45e-171	3.23e-169
AT2G14247	AT2G14247	2.20616	1.71e-65	2.27e-64			AT2G46860	PPA3	-1.11089	1.73e-08	5.72e-08
AT2G05940	AT2G05940	2.20441	3.59e-302	3.29e-300			AT2G47240	LACS1	-1.53135	2.85e-154	9.49e-153
AT5G66040	STR16	2.20356	0	0			AT2G47360	AT2G47360	-1.09421	5.47e-08	1.75e-07
AT3G03341	AT3G03341	2.20189	0.000958063	0.00205731			AT2G47370	AT2G47370	-1.25171	4.94e-06	1.35e-05
AT2G38350	AT2G38350	2.19886	0.00109108	0.00232221			AT2G47450	CAO	-1.24915	7.58e-115	1.76e-113
AT1G67770	TEL2	2.19882	0.000419055	0.000942427			AT2G47485	AT2G47485	-1.02553	1.03e-05	2.74e-05
AT3G06435	AT3G06435	2.19837	1.61e-112	3.7e-111			AT2G47500	AT2G47500	-1.18986	3.48e-43	3.25e-42
AT1G69150	AT1G69150	2.19724	1.98e-08	6.51e-08			AT2G47590	PHR2	-1.28552	2.09e-102	4.31e-101
AT5G13200	AT5G13200	2.19723	2.55e-107	5.52e-106			AT2G47880	GRXC13	-6.84031	1.12e-34	8.8e-34
AT1G17830	AT1G17830	2.19654	2e-173	7.82e-172			AT2G47890	COL13	-1.5691	8.28e-70	1.16e-68
AT4G08870	ARGAH2	2.19572	0	0			AT2G47910	CRR6	-1.8146	5.87e-94	1.1e-92
AT5G64120	PER71	2.19506	0	0			AT2G47920	NET3C	-1.40033	1.99e-06	5.63e-06
AT3G03670	PER28	2.19502	6.39e-06	1.73e-05			AT2G47940	DEGP2	-1.3521	5.67e-214	2.9e-212
AT5G47670	NFYB6	2.19289	0.000156041	0.000369723			AT2G48020	AT2G48020	-1.31486	1.23e-46	1.22e-45
AT3G14260	AT3G14260	2.19238	5.06e-33	3.85e-32			AT2G48070	RPH1	-1.3905	2.3e-97	4.45e-96
AT5G55050	AT5G55050	2.19122	1.4e-155	4.74e-154			AT2G48080	AT2G48080	-2.28263	8.42e-20	4.53e-19
AT1G33790	JAL4	2.18978	5.31e-204	2.51e-202			AT2G48120	PAC	-1.24674	6.59e-57	7.67e-56
AT2G30470	VAL1	2.18795	0	0			AT3G01060	AT3G01060	-1.95531	4.47e-117	1.06e-115
AT5G52690	AT5G52690	2.18761	0.00101379	0.00216946			AT3G01140	MYB106	-2.47006	1.29e-07	4.01e-07
AT1G65340	CYP96A3	2.18687	0.000133544	0.000318704			AT3G01260	AT3G01260	-1.17318	2.27e-13	9.64e-13
AT5G13220	TIFY9	2.1867	9.04e-204	4.26e-202			AT3G01370	ATCFM2	-1.29559	1.12e-75	1.69e-74
AT1G17615	AT1G17615	2.18623	0.000646369	0.00141811			AT3G01440	PNSL3	-2.93556	3.49e-151	1.13e-149
AT1G64710	AT1G64710	2.18589	0	0			AT3G01480	CYP38	-1.63414	1.1e-306	1.03e-304
AT3G13220	ABCG26	2.18459	0.00217634	0.0044405			AT3G01490	AT3G01490	-1.65682	1.07e-61	1.34e-60
AT1G63055	AT1G63055	2.18382	1.78e-09	6.26e-09			AT3G01500	BCA1	-2.62091	0	0
AT1G16360	ALIS4	2.18373	3.89e-13	1.64e-12			AT3G01550	PPT2	-3.01797	4.14e-21	2.32e-20
AT3G27490	AT3G27490	2.1832	9.13e-06	2.44e-05			AT3G01600	anac044	-1.08965	3.75e-16	1.78e-15
AT3G05320	AT3G05320	2.18266	4.37e-166	1.61e-164			AT3G01660	AT3G01660	-2.38165	2.84e-34	2.21e-33
AT1G26590	AT1G26590	2.18031	2.65e-11	1.02e-10			AT3G01670	SEOA	-1.05126	4.8e-38	4.05e-37
AT5G22580	AT5G22580	2.17901	3.05e-51	3.26e-50			AT3G01710	AT3G01710	-1.18527	6.52e-10	2.34e-09
AT1G07260	UGT71C3	2.17887	4.83e-141	1.44e-139			AT3G01730	AT3G01730	-1.5829	8.53e-05	0.00020828
AT3G54410	AT3G54410	2.17842	0.000269178	0.000620172			AT3G01750	AT3G01750	-1.15215	6.25e-11	2.37e-10
AT3G25573	AT3G25573	2.17727	0.00224901	0.00458125			AT3G01860	AT3G01860	-2.00815	3.84e-58	4.57e-57
AT5G43520	AT5G43520	2.17517	5.31e-25	3.34e-24			AT3G01870	AT3G01870	-2.14758	0.000825415	0.00178687
AT5G38790	AT5G38790	2.17296	1.45e-13	6.23e-13			AT3G01960	AT3G01960	-1.87323	4.12e-06	1.14e-05
AT1G59865	AT1G59865	2.17251	6.2e-09	2.11e-08			AT3G02030	AT3G02030	-1.09813	1.25e-10	4.69e-10
AT5G25820	AT5G25820	2.17219	1.51e-150	4.87e-149			AT3G02060	AT3G02060	-1.30628	6.21e-50	6.48e-49
AT1G35513	AT1G35513	2.17128	2.68e-19	1.42e-18			AT3G02240	RGF7	-1.34098	0.00193421	0.00397657
AT2G35930	PUB23	2.16859	1.41e-102	2.93e-101			AT3G02370	AT3G02370	-1.07331	0.000106062	0.00025633
AT1G16510	SAUR41	2.168	1.34e-28	9.18e-28			AT3G02450	AT3G02450	-1.52112	3.77e-143	1.15e-141
AT1G04380	AT1G04380	2.16582	0.000320132	0.000731174			AT3G02493	RTFL19	-1.66663	0.0185702	0.0326141
AT3G28610	AT3G28610	2.1655	0.00204182	0.00418605			AT3G02660	emb2768	-1.11987	3.17e-47	3.18e-46
AT3G62610	ATMYB11	2.16485	2.29e-06	6.45e-06			AT3G02730	TRXF1	-1.19263	7.79e-95	1.47e-93
AT2G45360	AT2G45360	2.16403	8.84e-21	4.92e-20			AT3G02830	ZFN1	-1.03895	1.63e-58	1.95e-57
AT2G22470	AGP2	2.16396	0	0			AT3G02850	SKOR	-1.16409	0.000512965	0.00114273
AT3G03910	GSH3	2.16354	1.64e-10	6.09e-10			AT3G02940	MYB107	-2.40241	1.16e-05	3.07e-05
AT5G22300	NIT4	2.16339	2.43e-98	4.76e-97			AT3G03130	AT3G03130	-1.02513	1.96e-18	1.01e-17
AT3G01202	AT3G01202	2.15964	1.02e-14	4.59e-14			AT3G03480	CHAT	-4.66127	4.05e-13	1.7e-12
AT2G41231	AT2G41231	2.15931	0.000289428	0.00066374			AT3G03630	CS26	-1.92614	2.37e-131	6.44e-130
AT5G01732	AT5G01732	2.1561	5e-27	3.31e-26			AT3G03680	AT3G03680	-1.21879	1.36e-18	7.05e-18
AT4G16260	AT4G16260	2.15324	0	0			AT3G03710	PNP1	-1.49731	4.13e-137	1.19e-135
AT3G24310	MYB305	2.15312	1.13e-09	4.02e-09			AT3G03780	MS2	-1.89419	3.17e-220	1.7e-218
AT1G07160	AT1G07160	2.152	2.72e-08	8.88e-08			AT3G03840	AT3G03840	-1.74651	2.95e-05	7.53e-05
AT3G28160	AT3G28160	2.15052	3.43e-278	2.66e-276			AT3G04110	GLR1.1	-1.72301	1.02e-29	7.19e-29
AT4G37290	AT4G37290	2.14993	2.73e-12	1.11e-11			AT3G04140	AT3G04140	-1.65683	1.1e-30	8e-30
AT3G05300	AT3G05300	2.14905	2.71e-10	9.94e-10			AT3G04260	PTAC3	-1.39036	4.62e-143	1.4e-141
AT1G35333	AT1G35333	2.14842	0.00256287	0.0051818			AT3G04290	LTL1	-2.12112	2.09e-235	1.25e-233
AT5G35940	JAL41	2.14816	7.34e-241	4.52e-239			AT3G04445	AT3G04445	-1.24842	0.0262063	0.0447496
AT4G28485	DMP7	2.14772	0.00117569	0.00249222			AT3G04450	AT3G04450	-1.11852	1.07e-10	4.03e-10
AT1G74450	AT1G74450	2.14727	4.01e-205	1.91e-203			AT3G04550	RAF2	-1.61431	4.12e-137	1.18e-135
AT3G46658	AT3G46658	2.14717	2.27e-50	2.39e-49			AT3G04760	AT3G04760	-1.29515	6.19e-67	8.39e-66
AT4G29305	LCR25	2.14692	0.000136397	0.000325136			AT3G04790	RPI3	-1.60797	1.48e-249	9.69e-248
AT5G09440	EXL4	2.14656	0	0			AT3G04960	AT3G04960	-2.2285	1.96e-08	6.45e-08
AT3G61390	PUB36	2.14322	1.48e-05	3.9e-05			AT3G05180	AT3G05180	-1.91775	4.36e-49	4.49e-48
AT1G67360	AT1G67360	2.14239	0	0			AT3G05327	AT3G05327	-1.57696	0.000136372	0.000325108
AT5G21960	ERF016	2.14097	5.01e-20	2.71e-19			AT3G05330	TAN	-1.12844	4.7e-15	2.15e-14
AT3G04220	AT3G04220	2.14088	1.17e-22	6.9e-22			AT3G05370	AtRLP31	-1.05958	5.85e-14	2.56e-13
AT1G64660	MGL	2.14059	1.98e-153	6.56e-152			AT3G05410	PPD7	-1.26836	8.08e-41	7.21e-40
AT2G45130	SPX3	2.13911	3.51e-208	1.72e-206			AT3G05470	FH11	-1.59045	1.66e-22	9.76e-22
AT4G17980	anac071	2.13863	6.17e-08	1.96e-07			AT3G05600	AT3G05600	-1.25752	1.38e-15	6.44e-15
AT3G59010	PME35	2.13837	1.4e-75	2.1e-74			AT3G05620	PME22	-1.02789	3.81e-05	9.65e-05
AT1G28660	AT1G28660	2.13736	0	0			AT3G05660	AtRLP33	-1.53042	4e-07	1.2e-06
AT3G53230	CDC48D	2.13681	0	0			AT3G05690	NFYA2	-2.37544	1.05e-115	2.46e-114
AT1G58225	AT1G58225	2.13633	1.1e-05	2.94e-05			AT3G05730	AT3G05730	-2.12158	3.37e-46	3.32e-45
AT3G23730	XTH16	2.13455	0	0			AT3G05790	LON4	-1.31261	2.27e-05	5.86e-05
AT3G45970	EXLA1	2.13429	1.38e-282	1.12e-280			AT3G05800	BHLH150	-3.0027	7.86e-68	1.08e-66
AT4G34410	ERF109	2.13375	1.05e-93	1.95e-92			AT3G05860	AT3G05860	-1.69836	0.00972164	0.0179536
AT2G21910	CYP96A5	2.13313	0.00273584	0.00551487			AT3G05890	RCI2B	-1.07538	1.22e-20	6.74e-20
AT3G02620	S-ACP-DES4	2.13305	6.61e-80	1.06e-78			AT3G05936	AT3G05936	-2.4965	1e-22	5.93e-22
AT3G50200	AT3G50200	2.13206	2.89e-09	1e-08			AT3G06035	AT3G06035	-1.36451	8.23e-47	8.18e-46
AT1G74310	CLPB1	2.13159	0	0			AT3G06070	AT3G06070	-2.9705	4.32e-64	5.62e-63
AT1G61440	AT1G61440	2.12911	9.19e-08	2.89e-07			AT3G06080	TBL10	-1.11708	2.04e-51	2.19e-50
AT4G01760	AT4G01760	2.12857	0.000101465	0.000245747			AT3G06120	MUTE	-1.08728	0.00248198	0.00502892
AT3G11415	AT3G11415	2.12749	0.000195573	0.000458352			AT3G06130	AT3G06130	-1.15912	1.44e-42	1.32e-41
AT5G22250	CAF1-11	2.12682	9.9e-155	3.31e-153			AT3G06145	AT3G06145	-1.62776	1.88e-13	8.03e-13
AT5G59490	AT5G59490	2.12627	1.41e-33	1.09e-32			AT3G06160	REM21	-2.55644	3.03e-05	7.75e-05
AT5G05900	UGT76C3	2.12563	6.42e-15	2.91e-14			AT3G06630	AT3G06630	-1.74057	1.55e-05	4.07e-05
AT1G55020	LOX1	2.12554	0	0			AT3G06730	CITRX	-1.69327	1.28e-53	1.42e-52
AT1G17170	GSTU24	2.12477	3.16e-189	1.38e-187			AT3G06880	AT3G06880	-1.17941	2.03e-77	3.15e-76
AT3G45120	AT3G45120	2.12211	0.00265959	0.00536904			AT3G06950	AT3G06950	-1.10776	1.02e-26	6.68e-26
AT4G33150	LKR/SDH	2.1216	0	0			AT3G06980	RH50	-1.79365	3.59e-237	2.19e-235
AT5G65600	LECRK92	2.12043	1.25e-15	5.82e-15			AT3G07070	AT3G07070	-1.27864	4.16e-14	1.83e-13
AT1G54575	AT1G54575	2.11983	1.11e-208	5.44e-207			AT3G07320	AT3G07320	-1.22419	4.61e-43	4.28e-42
AT3G28170	AT3G28170	2.11924	0.00270535	0.00545651			AT3G07430	emb1990	-1.11645	3.33e-66	4.46e-65
AT4G27260	GH3.5	2.11781	8.07e-287	6.8e-285			AT3G07490	CML3	-1.66796	0.000175552	0.000413736
AT2G45135	AT2G45135	2.11758	1.41e-86	2.43e-85			AT3G07670	AT3G07670	-1.24946	5.12e-60	6.31e-59
AT1G11190	ENDO1	2.11636	4.51e-61	5.63e-60			AT3G07970	QRT2	-1.13254	0.000192728	0.000452194
AT4G32500	AKT5	2.11597	2.01e-06	5.68e-06			AT3G08010	ATAB2	-1.47297	6.99e-104	1.46e-102
AT3G06560	PAPS3	2.11508	0.002966	0.0059416			AT3G08660	AT3G08660	-1.30015	1.49e-05	3.9e-05
AT5G51190	ERF105	2.11401	2.29e-273	1.7e-271			AT3G08770	LTP6	-1.66189	7.27e-31	5.29e-30
AT2G16005	AT2G16005	2.1112	7.43e-26	4.79e-25			AT3G08920	STR10	-1.50079	9.71e-71	1.37e-69
AT5G14400	CYP724A1	2.11072	0.00283201	0.0056939			AT3G08940	LHCB4.2	-1.20178	4.08e-243	2.57e-241
AT1G44830	ERF014	2.11061	1.18e-31	8.77e-31			AT3G09050	AT3G09050	-1.3306	4e-44	3.82e-43
AT4G37520	PER50	2.10885	0	0			AT3G09150	HY2	-1.4415	9.52e-32	7.06e-31
AT5G10695	AT5G10695	2.10504	1.85e-97	3.58e-96			AT3G09160	AT3G09160	-1.31492	1.36e-06	3.91e-06
AT5G64790	AT5G64790	2.10438	0.00318474	0.00635153			AT3G09210	PTAC13	-1.41199	1.73e-120	4.27e-119
AT5G44940	AT5G44940	2.10339	0.000526683	0.00117118			AT3G09240	AT3G09240	-1.57929	7.24e-10	2.6e-09
AT5G17430	BBM	2.10309	9.51e-21	5.28e-20			AT3G09540	AT3G09540	-1.89978	2.91e-26	1.89e-25
AT1G64065	AT1G64065	2.10307	7.97e-27	5.25e-26			AT3G09550	AT3G09550	-2.00522	2.07e-07	6.33e-07
AT1G61260	AT1G61260	2.10206	2.09e-87	3.62e-86			AT3G09580	AT3G09580	-1.66482	2.08e-73	3.05e-72
AT4G27460	CBSX5	2.10152	6.44e-26	4.16e-25			AT3G10060	FKBP16-4	-1.43735	7.66e-84	1.28e-82
AT4G24030	AT4G24030	2.10104	0.00232593	0.00472742			AT3G10120	AT3G10120	-1.19216	1.44e-13	6.18e-13
AT2G32020	AT2G32020	2.10038	4.75e-20	2.58e-19			AT3G10150	PAP16	-1.10758	2.06e-05	5.33e-05
AT1G52343	AT1G52343	2.09879	1.22e-08	4.06e-08			AT3G10160	FPGS2	-1.27331	3.56e-98	6.97e-97
AT1G24570	AT1G24570	2.09616	0.00326398	0.00649493			AT3G10230	LCY1	-1.03828	9.99e-57	1.16e-55
AT5G44480	DUR	2.09522	5.86e-128	1.54e-126			AT3G10270	GYRB1	-1.29589	4.62e-77	7.13e-76
AT4G19810	AT4G19810	2.08939	1.76e-284	1.46e-282			AT3G10290	AT3G10290	-1.31184	0.000275497	0.000633727
AT4G01610	AT4G01610	2.08929	0	0			AT3G10520	AHB2	-1.41626	3.69e-102	7.6e-101
AT5G06730	PER54	2.08892	6.03e-54	6.71e-53			AT3G10840	AT3G10840	-1.33829	3.01e-37	2.5e-36
AT3G21150	BBX32	2.08888	1.86e-11	7.26e-11			AT3G10870	MES17	-2.15234	1.33e-30	9.65e-30
AT4G30975	AT4G30975	2.08863	4.67e-16	2.21e-15			AT3G10912	CPuORF63	-1.23685	6.19e-06	1.68e-05
AT3G30725	GDU6	2.08813	1.41e-18	7.31e-18			AT3G11000	AT3G11000	-1.21385	0.00858722	0.0159906
AT4G33120	AT4G33120	2.08793	8.33e-91	1.51e-89			AT3G11090	LBD21	-1.18152	2.74e-14	1.21e-13
AT3G52820	PAP22	2.08665	2.08e-22	1.21e-21			AT3G11570	TBL8	-1.05518	0.000201424	0.000471182
AT1G65690	AT1G65690	2.08461	1.22e-108	2.7e-107			AT3G11630	BAS1	-1.37774	3.53e-282	2.81e-280
AT5G26770	AT5G26770	2.08452	3.01e-90	5.4e-89			AT3G11680	ALMT8	-1.49857	0.0288367	0.0488472
AT3G21860	ASK10	2.08396	5.6e-08	1.79e-07			AT3G11750	FOLB1	-1.08913	1.78e-06	5.05e-06
AT3G17690	CNGC19	2.08383	2.02e-29	1.41e-28			AT3G11920	AT3G11920	-2.00266	0.00479077	0.00929924
AT4G25470	DREB1C	2.08224	2.65e-21	1.5e-20			AT3G11930	AT3G11930	-1.32266	3.51e-127	9.16e-126
AT1G09930	OPT2	2.08221	0.00078818	0.0017106			AT3G12345	AT3G12345	-1.29195	7.06e-138	2.05e-136
AT2G35550	BPC7	2.08195	5.63e-25	3.54e-24			AT3G12410	AT3G12410	-1.79997	0.00330227	0.00656478
AT5G45110	NPR3	2.07917	0	0			AT3G12460	AT3G12460	-1.81967	0.00164204	0.00341578
AT4G20830	AT4G20830	2.07908	0	0			AT3G12685	AT3G12685	-1.91704	1.84e-25	1.17e-24
AT5G09470	PUMP6	2.0788	2.45e-84	4.12e-83			AT3G12780	PGK1	-1.24611	2.36e-283	1.94e-281
AT5G47960	RABA4C	2.07761	1.42e-50	1.5e-49			AT3G12870	AT3G12870	-1.03486	1.02e-09	3.62e-09
AT5G22355	AT5G22355	2.07613	2.65e-16	1.27e-15			AT3G12915	AT3G12915	-2.01801	1.09e-37	9.12e-37
AT5G27420	ATL31	2.07431	2.65e-228	1.5e-226			AT3G12930	IJ	-1.80798	1.72e-127	4.51e-126
AT4G01540	NAC68	2.07279	4.22e-96	8.07e-95			AT3G13000	AT3G13000	-1.0256	2.67e-14	1.18e-13
AT5G42580	CYP705A12	2.07214	3.75e-65	4.94e-64			AT3G13120	RPS10	-1.46659	2.81e-270	2.04e-268
AT5G04310	AT5G04310	2.0718	1.32e-100	2.69e-99			AT3G13175	AT3G13175	-1.24272	3.03e-11	1.17e-10
AT1G77100	PER13	2.0717	0.00364317	0.00720662			AT3G13180	AT3G13180	-1.47448	8.11e-60	9.95e-59
AT1G22210	TPPC	2.07133	0.000586463	0.00129505			AT3G13470	CPN60B2	-1.20501	9.68e-208	4.69e-206
AT1G15010	AT1G15010	2.06807	7.11e-14	3.09e-13			AT3G13540	MYB5	-1.98428	0.000850353	0.00183813
AT3G04190	AT3G04190	2.06703	0.00365183	0.00722072			AT3G13740	AT3G13740	-1.44277	3.13e-59	3.8e-58
AT5G63350	AT5G63350	2.06524	1.11e-09	3.93e-09			AT3G13760	AT3G13760	-1.41745	1.1e-09	3.9e-09
AT2G23800	GGPPS2	2.06479	0.00267028	0.00538886			AT3G13840	SCL29	-3.35835	6.43e-08	2.04e-07
AT1G30920	AT1G30920	2.06412	0.00368133	0.00727514			AT3G14110	FLU	-1.13187	9.36e-97	1.8e-95
AT1G78410	VQ10	2.06272	2.59e-32	1.94e-31			AT3G14150	GLO3	-1.15085	5.44e-42	4.96e-41
AT5G45340	CYP707A3	2.06182	4.57e-155	1.53e-153			AT3G14210	ESM1	-5.41673	0	0
AT5G25440	AT5G25440	2.06158	1.69e-74	2.51e-73			AT3G14330	PCMP-H57	-1.02631	4.07e-22	2.36e-21
AT2G44798	AT2G44798	2.06076	1.99e-30	1.43e-29			AT3G14415	GLO2	-1.25115	7.37e-215	3.79e-213
AT1G02580	MEA	2.06013	0.000391457	0.000883811			AT3G14420	GLO1	-1.10696	5.33e-174	2.09e-172
AT1G51010	AT1G51010	2.05959	0.00127592	0.00269203			AT3G14540	TPS19	-1.99541	3.58e-07	1.08e-06
AT4G39404	AT4G39404	2.05779	0.000141651	0.000337206			AT3G14760	AT3G14760	-1.26176	9.1e-07	2.65e-06
AT3G45010	SCPL48	2.05722	0	0			AT3G14770	SWEET2	-1.30091	2.21e-09	7.71e-09
AT3G25882	NIMIN-2	2.05693	5.45e-35	4.32e-34			AT3G14900	AT3G14900	-2.02926	1.7e-133	4.71e-132
AT4G15340	PEN1	2.0556	2.01e-129	5.38e-128			AT3G14930	HEME1	-1.6339	1.06e-263	7.39e-262
AT4G12490	AT4G12490	2.05267	2.27e-121	5.66e-120			AT3G15030	TCP4	-1.10346	3.89e-27	2.58e-26
AT5G60760	AT5G60760	2.05196	3.17e-98	6.21e-97			AT3G15110	AT3G15110	-1.36495	7.01e-72	1.01e-70
AT5G36100	AT5G36100	2.05112	0.00293964	0.00589213			AT3G15190	RPS20	-1.45273	7e-208	3.41e-206
AT3G59730	LECRK56	2.04876	4.83e-09	1.65e-08			AT3G15353	MT3	-1.43174	1.63e-95	3.1e-94
AT1G09950	RAS1	2.0452	1.43e-19	7.6e-19			AT3G15354	SPA3	-1.4424	5.92e-63	7.58e-62
AT1G62225	AT1G62225	2.0451	0.00105929	0.00225998			AT3G15360	ATHM4	-1.52328	4.44e-211	2.23e-209
AT5G01760	AT5G01760	2.04459	1.22e-10	4.56e-10			AT3G15450	AT3G15450	-2.31114	0	0
AT5G20420	CLSY2	2.04409	4.96e-19	2.6e-18			AT3G15520	CYP37	-1.2364	2.03e-61	2.54e-60
AT5G55420	AT5G55420	2.04341	0.000966795	0.00207453			AT3G15550	AT3G15550	-1.01774	8.92e-16	4.19e-15
AT1G10340	AT1G10340	2.0423	1.25e-23	7.59e-23			AT3G15570	AT3G15570	-2.17582	6.32e-88	1.1e-86
AT3G12730	AT3G12730	2.04204	1.5e-100	3.05e-99			AT3G15630	AT3G15630	-1.17354	1.74e-49	1.8e-48
AT5G44420	PDF1.2A	2.0405	1.27e-179	5.17e-178			AT3G15760	AT3G15760	-1.46915	1.48e-15	6.91e-15
AT1G37150	HCS2	2.03975	1.7e-20	9.37e-20			AT3G15840	PIFI	-1.80876	0	0
AT5G61730	ATATH11	2.03681	0.000790322	0.0017148			AT3G15900	AT3G15900	-1.60305	6.55e-21	3.66e-20
AT2G47120	SDR3C	2.03607	0.00416836	0.00817631			AT3G16000	MFP1	-1.44824	5.22e-183	2.19e-181
AT2G41480	PER25	2.03388	4.48e-63	5.74e-62			AT3G16070	AT3G16070	-1.51959	0.00331956	0.00659651
AT3G29150	AT3G29150	2.03081	0.00425054	0.00832828			AT3G16140	PSAH1	-1.42718	6.73e-170	2.57e-168
AT5G08030	GDPD6	2.02852	8.63e-99	1.71e-97			AT3G16220	AT3G16220	-1.14756	2.3e-25	1.46e-24
AT4G19230	CYP707A1	2.0274	5.17e-117	1.22e-115			AT3G16250	PNSB3	-2.04933	8.64e-189	3.77e-187
AT3G08970	ERDJ3A	2.02469	2.13e-73	3.12e-72			AT3G16370	APG	-2.04648	0	0
AT3G21560	UGT84A2	2.02363	6.71e-272	4.91e-270			AT3G16380	PAB6	-2.33631	3.47e-06	9.64e-06
AT2G38520	AT2G38520	2.02067	0.00443133	0.00865786			AT3G16560	AT3G16560	-1.53923	4.71e-56	5.41e-55
AT5G13320	GH3.12	2.02051	1.26e-32	9.48e-32			AT3G16670	AT3G16670	-2.06503	0	0
AT5G39890	PCO2	2.01994	8.99e-163	3.25e-161			AT3G16680	AT3G16680	-1.75703	0.00942125	0.017444
AT3G46110	AT3G46110	2.01918	1.64e-71	2.34e-70			AT3G16690	SWEET16	-1.33985	2.41e-23	1.45e-22
AT3G30770	AT3G30770	2.01836	0.00448518	0.00875477			AT3G17130	AT3G17130	-1.17141	0.00106738	0.00227587
AT3G44560	FAR8	2.01836	0.00448518	0.00875477			AT3G17170	RFC3	-1.91021	7.8e-152	2.55e-150
AT3G44260	CAF1-9	2.01786	1.17e-280	9.14e-279			AT3G17350	AT3G17350	-1.44637	8.68e-15	3.92e-14
AT1G64540	AT1G64540	2.01683	4.91e-15	2.24e-14			AT3G17470	CRSH	-1.05266	2.3e-31	1.69e-30
AT4G15310	CYP702A3	2.01652	0.0018229	0.00376338			AT3G17640	AT3G17640	-1.58874	7.65e-15	3.46e-14
AT4G13195	CLE44	2.01595	5.44e-77	8.38e-76			AT3G18000	NMT1	-1.53135	0.0212977	0.0369848
AT2G39350	ABCG1	2.01461	2.25e-142	6.77e-141			AT3G18010	WOX1	-1.69507	1.09e-06	3.15e-06
AT1G35310	MLP168	2.01406	8.35e-27	5.49e-26			AT3G18050	AT3G18050	-1.73964	7.57e-176	2.99e-174
AT1G47395	AT1G47395	2.01255	9.22e-36	7.43e-35			AT3G18070	BGLU43	-1.31589	5.05e-06	1.38e-05
AT5G08141	AtbZIP75	2.01135	0.00460246	0.00896393			AT3G18110	EMB1270	-1.59847	1.36e-114	3.16e-113
AT4G13918	AT4G13918	2.01086	6.15e-140	1.81e-138			AT3G18200	AT3G18200	-1.08346	3.82e-09	1.32e-08
AT1G54560	XI-E	2.0075	1.21e-06	3.5e-06			AT3G18390	EMB1865	-1.59092	3.98e-207	1.91e-205
AT3G16860	COBL8	2.00724	2.06e-62	2.61e-61			AT3G18500	CCR4-3	-1.62688	1.26e-57	1.48e-56
AT5G19810	AT5G19810	2.00712	2.36e-11	9.15e-11			AT3G18680	AT3G18680	-1.49349	3.32e-165	1.22e-163
AT4G15370	BARS1	2.00574	1.63e-11	6.35e-11			AT3G18773	ATL77	-2.40541	9.3e-33	7.04e-32
AT4G13030	AT4G13030	2.00567	1.74e-162	6.26e-161			AT3G18777	AT3G18777	-2.03525	3.97e-06	1.1e-05
AT5G15130	WRKY72	2.00355	1.2e-65	1.59e-64			AT3G18800	AT3G18800	-1.51667	5.58e-29	3.86e-28
AT4G23190	CRK11	2.00344	7.1e-172	2.74e-170			AT3G18870	AT3G18870	-2.1605	1.8e-28	1.23e-27
AT4G13820	AT4G13820	2.00311	8.31e-11	3.14e-10			AT3G18890	TIC62	-1.60239	5.32e-187	2.29e-185
AT4G17660	AT4G17660	2.00253	4.89e-06	1.34e-05			AT3G19030	AT3G19030	-1.35039	1.61e-47	1.62e-46
AT5G25450	QCR7-2	2.00137	3.02e-34	2.36e-33			AT3G19320	AT3G19320	-1.50562	0.00181642	0.00375157
AT2G25630	BGLU14	2.0007	0.0048212	0.00935464			AT3G19370	AT3G19370	-1.09718	4.43e-51	4.72e-50
AT4G21326	ATSBT3.12	2.00034	1.21e-162	4.35e-161			AT3G19430	AT3G19430	-1.05563	1.2e-12	4.96e-12
AT1G12890	ERF088	1.99635	0.000659062	0.00144455			AT3G19450	CAD4	-1.02799	2.85e-77	4.41e-76
AT4G28490	RLK5	1.99498	8.37e-142	2.5e-140			AT3G19470	AT3G19470	-1.00136	1.08e-08	3.6e-08
AT3G19580	AZF2	1.99429	1.3e-99	2.61e-98			AT3G19480	PGDH3	-1.62902	4.83e-75	7.22e-74
AT1G30620	MUR4	1.99296	2.74e-104	5.77e-103			AT3G19620	BXL5	-2.74043	8.78e-43	8.12e-42
AT3G29810	COBL3	1.99251	9.47e-113	2.17e-111			AT3G20015	ASPG2	-1.12849	3.37e-30	2.41e-29
AT4G10380	NIP5-1	1.99228	2.68e-272	1.97e-270			AT3G20110	CYP705A20	-1.86442	4.43e-16	2.1e-15
AT1G14370	APK2A	1.99125	7.39e-161	2.6e-159			AT3G20150	AT3G20150	-1.00539	4.73e-25	2.98e-24
AT1G72520	LOX4	1.99117	1.82e-149	5.83e-148			AT3G20230	AT3G20230	-1.10522	7.18e-76	1.09e-74
AT4G18350	NCED2	1.99052	0.000127851	0.000305826			AT3G20300	AT3G20300	-1.44234	1.34e-29	9.47e-29
AT2G44590	DRP1D	1.99052	3.43e-19	1.81e-18			AT3G20380	AT3G20380	-1.43094	5.08e-26	3.29e-25
AT1G10370	GSTU17	1.9895	3.98e-126	1.03e-124			AT3G20420	RTL2	-2.26688	4.21e-07	1.26e-06
AT3G18570	AT3G18570	1.98852	3.88e-05	9.83e-05			AT3G20440	SBE3	-1.86548	2.55e-95	4.83e-94
AT2G06650	AT2G06650	1.98833	0.00507006	0.00979607			AT3G20450	AT3G20450	-1.30331	8.05e-05	0.000197068
AT5G11920	CWINV6	1.98801	3.31e-29	2.31e-28			AT3G20557	AT3G20557	-1.70217	0.00393879	0.0077524
AT4G19570	AT4G19570	1.98784	3.14e-05	8.02e-05			AT3G20680	AT3G20680	-1.70462	4.44e-66	5.94e-65
AT3G59850	AT3G59850	1.98776	4.55e-29	3.16e-28			AT3G20830	UCNL	-1.199	2.73e-12	1.11e-11
AT3G26210	CYP71B23	1.98753	9.48e-149	3.01e-147			AT3G20865	AGP40	-1.65995	0.0109055	0.0199682
AT5G02760	AT5G02760	1.98734	2.7e-190	1.19e-188			AT3G21020	AT3G21020	-1.04942	0.00136928	0.00287895
AT1G68320	MYB62	1.98616	3.92e-11	1.5e-10			AT3G21055	PSBT	-1.36557	1.25e-25	8e-25
AT5G03120	AT5G03120	1.9856	6.42e-77	9.86e-76			AT3G21200	GLUTRBP	-1.09405	1.62e-77	2.52e-76
AT4G28390	AAC3	1.98551	7.98e-136	2.27e-134			AT3G21260	GLTP3	-1.04066	9.7e-11	3.65e-10
AT5G09550	AT5G09550	1.98437	0.00461021	0.0089776			AT3G21300	AT3G21300	-1.64053	7.23e-74	1.07e-72
AT5G54060	A3G2XYLT	1.98285	5.56e-56	6.39e-55			AT3G21310	AT3G21310	-2.73882	1.33e-08	4.42e-08
AT4G35180	LHT7	1.98201	3.23e-14	1.43e-13			AT3G21340	AT3G21340	-1.95643	6.13e-07	1.81e-06
AT3G04660	AT3G04660	1.98131	0.00283965	0.00570694			AT3G21670	NPF6.4	-3.11123	7.55e-109	1.67e-107
AT2G21510	AT2G21510	1.97968	4.97e-13	2.09e-12			AT3G21760	UGT71B2	-1.53448	8.35e-09	2.81e-08
AT1G56242	AT1G56242	1.97967	7.96e-05	0.000195036			AT3G21780	UGT71B6	-1.03342	1.39e-06	3.99e-06
AT2G18690	AT2G18690	1.97871	3.1e-185	1.32e-183			AT3G21790	UGT71B7	-1.23203	1.72e-49	1.78e-48
AT1G22690	GASA9	1.97851	7.3e-142	2.19e-140			AT3G21870	CYCU1-1	-3.31342	5.69e-07	1.69e-06
AT3G04720	HEL	1.97662	0	0			AT3G21950	AT3G21950	-2.96229	3.56e-39	3.07e-38
AT5G05220	AT5G05220	1.97527	0.00444699	0.00868433			AT3G22142	AT3G22142	-2.80106	9.62e-47	9.55e-46
AT2G46270	GBF3	1.9724	1.79e-98	3.52e-97			AT3G22150	PCMP-E95	-2.56673	6.86e-220	3.68e-218
AT4G36930	SPT	1.97051	6.36e-152	2.08e-150			AT3G22210	AT3G22210	-2.02094	1.16e-77	1.82e-76
AT5G28237	AT5G28237	1.97042	8.03e-08	2.54e-07			AT3G22420	WNK2	-1.20217	4.75e-19	2.5e-18
AT1G76650	CML38	1.97028	4.69e-177	1.87e-175			AT3G23070	ATCFM3A	-1.5559	2.25e-121	5.6e-120
AT3G46620	AT3G46620	1.9693	6.63e-255	4.48e-253			AT3G23410	FAO3	-1.46359	3.66e-76	5.55e-75
AT5G09290	SAL4	1.96835	1.89e-32	1.42e-31			AT3G23480	AT3G23480	-2.70923	5.25e-55	5.93e-54
AT5G07990	CYP75B1	1.96833	1.42e-82	2.35e-81			AT3G23530	AT3G23530	-1.59176	1.4e-98	2.77e-97
AT3G02875	ILR1	1.9673	1.49e-156	5.08e-155			AT3G23700	AT3G23700	-1.55279	5.52e-146	1.72e-144
AT2G28570	AT2G28570	1.96687	7.82e-54	8.68e-53			AT3G23810	SAHH2	-1.53561	2.33e-271	1.7e-269
AT3G06360	AGP27	1.96509	5.42e-20	2.93e-19			AT3G23840	CER26L	-2.23	2.27e-39	1.96e-38
AT1G21245	AT1G21245	1.96486	0.00564792	0.0108273			AT3G24300	AMT1-3	-1.56391	3.54e-31	2.6e-30
AT5G44306	AT5G44306	1.96439	0.000676634	0.00148123			AT3G24360	AT3G24360	-1.25679	0.000739629	0.00161258
AT5G02780	GSTL1	1.96173	3.95e-25	2.5e-24			AT3G24420	AT3G24420	-1.98432	2.3e-15	1.06e-14
AT4G02950	AT4G02950	1.96151	0.00598182	0.011417			AT3G24430	HCF101	-1.1629	1.88e-54	2.1e-53
AT2G30140	UGT87A2	1.96137	2.09e-272	1.54e-270			AT3G24518	AT3G24518	-3.91365	1.38e-15	6.42e-15
AT4G22470	AT4G22470	1.96012	1.37e-153	4.57e-152			AT3G24560	RSY3	-1.07713	1.04e-10	3.89e-10
AT2G29480	GSTU2	1.958	1.46e-19	7.81e-19			AT3G24590	PLSP1	-1.13292	1.43e-39	1.24e-38
AT5G06720	PER53	1.95655	7.3e-69	1.01e-67			AT3G25410	BASS3	-1.06194	8.06e-45	7.78e-44
AT5G16453	AT5G16453	1.95607	0.00578468	0.0110661			AT3G25480	STR4A	-1.44622	5.18e-88	9.05e-87
AT2G36750	UGT73C1	1.95496	4.32e-56	4.97e-55			AT3G25660	GATA	-1.34139	6.44e-159	2.23e-157
AT2G29440	GSTU6	1.95405	2.49e-88	4.37e-87			AT3G25670	AT3G25670	-1.14519	0.00471184	0.00915751
AT1G15300	AT1G15300	1.95325	5.24e-45	5.07e-44			AT3G25717	RTFL16	-1.02126	4.41e-15	2.02e-14
AT2G36660	PAB7	1.95145	3.79e-23	2.27e-22			AT3G25760	AOC1	-1.47473	3.4e-249	2.21e-247
AT4G26488	AT4G26488	1.94924	1.16e-10	4.36e-10			AT3G25770	AOC2	-1.9942	0	0
AT5G47050	AT5G47050	1.94804	2.06e-125	5.31e-124			AT3G25790	AT3G25790	-1.57521	8.36e-14	3.62e-13
AT1G32900	GBSS1	1.94665	0	0			AT3G25805	AT3G25805	-1.12382	3.12e-37	2.59e-36
AT2G36380	ABCG34	1.94551	0	0			AT3G25820	TPS27	-1.5805	4.2e-25	2.65e-24
AT4G38000	DOF4.7	1.9447	0.00293206	0.00587931			AT3G25830	TPS27	-1.47055	1.59e-21	9.06e-21
AT4G27250	AT4G27250	1.94449	2.07e-08	6.79e-08			AT3G25920	RPL15	-1.42238	1.56e-270	1.13e-268
AT5G24040	AT5G24040	1.94165	5.44e-06	1.48e-05			AT3G25930	AT3G25930	-1.1785	2.21e-36	1.81e-35
AT1G73965	CLE13	1.9408	1.59e-09	5.61e-09			AT3G26165	CYP71B18	-1.1062	3.01e-14	1.33e-13
AT5G57480	AT5G57480	1.94009	1.07e-76	1.64e-75			AT3G26230	CYP71B24	-1.41419	8.82e-16	4.14e-15
AT5G56620	anac099	1.93765	2.49e-09	8.66e-09			AT3G26235	AT3G26235	-1.82146	0.0105164	0.0193072
AT4G32460	AT4G32460	1.93613	2.85e-207	1.37e-205			AT3G26240	AT3G26240	-1.35138	2e-31	1.47e-30
AT3G25240	AT3G25240	1.9359	1.44e-111	3.26e-110			AT3G26280	CYP71B4	-2.54553	5.3e-166	1.95e-164
AT1G07390	AtRLP1	1.93456	1.83e-64	2.39e-63			AT3G26295	CYP71B33	-1.75712	0.0120562	0.021923
AT3G15518	AT3G15518	1.93295	5.34e-16	2.52e-15			AT3G26300	CYP71B34	-1.54804	1.28e-98	2.53e-97
AT5G16360	AT5G16360	1.93265	6.19e-43	5.74e-42			AT3G26310	CYP71B35	-1.42933	1.82e-21	1.03e-20
AT2G33080	AtRLP28	1.9318	0.0058585	0.0112015			AT3G26320	CYP71B36	-3.2561	1.49e-55	1.7e-54
AT1G02220	NAC003	1.92928	2.79e-135	7.83e-134			AT3G26460	AT3G26460	-2.17631	6.02e-21	3.36e-20
AT3G32030	TPS30	1.92839	6.44e-33	4.89e-32			AT3G26490	AT3G26490	-1.32383	6.7e-12	2.67e-11
AT2G19890	AT2G19890	1.9273	0.00476962	0.00926182			AT3G26510	AT3G26510	-1.6703	5.79e-140	1.7e-138
AT5G05530	AT5G05530	1.92698	2.77e-05	7.11e-05			AT3G26580	AT3G26580	-1.03967	3.09e-83	5.14e-82
AT4G12410	AT4G12410	1.92567	4.88e-09	1.67e-08			AT3G26650	GAPA1	-1.24322	2.6e-257	1.78e-255
AT1G50310	STP9	1.92537	0.00416695	0.00817419			AT3G26710	CCB1	-1.23179	9.74e-63	1.24e-61
AT5G20810	AT5G20810	1.9235	4.02e-09	1.38e-08			AT3G26740	CCL	-1.70487	7.73e-222	4.2e-220
AT5G27360	SFP2	1.92215	7.19e-163	2.6e-161			AT3G26900	SKL1	-1.34973	6.57e-92	1.21e-90
AT4G37050	PLP3	1.91996	0.000635699	0.00139618			AT3G26960	AT3G26960	-2.31975	1.47e-14	6.56e-14
AT3G19002	AT3G19002	1.91819	0.0040182	0.00789803			AT3G27160	GHS1	-1.66683	1.96e-162	7.04e-161
AT1G76070	AT1G76070	1.91744	2.66e-58	3.18e-57			AT3G27650	LBD25	-1.65547	5.98e-12	2.39e-11
AT5G01660	AT5G01660	1.91697	3.17e-42	2.9e-41			AT3G27690	LHCB2.4	-2.41998	0	0
AT4G21930	AT4G21930	1.91629	0.000279132	0.000641434			AT3G27730	MER3	-1.21649	2.76e-05	7.08e-05
AT3G62260	AT3G62260	1.9151	7.36e-105	1.55e-103			AT3G27750	AT3G27750	-1.26726	2.35e-24	1.45e-23
AT1G15630	AT1G15630	1.91509	7.7e-08	2.44e-07			AT3G27830	RPL12A	-1.49006	0	0
AT5G64660	PUB27	1.91458	1.94e-99	3.88e-98			AT3G27850	RPL12C	-1.59628	8.69e-249	5.61e-247
AT5G64900	PEP1	1.91357	5.38e-24	3.3e-23			AT3G27920	GL1	-2.80823	1.66e-08	5.5e-08
AT3G58410	AT3G58410	1.91338	0.00683468	0.0129224			AT3G27925	DEGP1	-1.2124	6.37e-95	1.2e-93
AT4G23010	UTR2	1.91241	1.14e-269	8.23e-268			AT3G28007	SWEET4	-1.72021	2.67e-08	8.7e-08
AT4G26466	LRE	1.91154	0.00384195	0.00757504			AT3G28070	AT3G28070	-1.79093	5.78e-80	9.26e-79
AT3G44290	NAC60	1.9098	1.47e-06	4.22e-06			AT3G28080	AT3G28080	-1.03357	8.89e-21	4.94e-20
AT5G49280	AT5G49280	1.90914	1.26e-161	4.46e-160			AT3G28130	AT3G28130	-1.32502	6.62e-27	4.37e-26
AT2G04100	DTXL5	1.909	1.02e-88	1.79e-87			AT3G28220	AT3G28220	-1.85744	1.01e-85	1.72e-84
AT5G23990	ATFRO5	1.90833	1.09e-15	5.1e-15			AT3G28270	AT3G28270	-2.68754	2.96e-22	1.73e-21
AT5G58680	AT5G58680	1.90759	4.21e-21	2.36e-20			AT3G28290	AT14A	-1.43592	8.39e-26	5.4e-25
AT2G44080	ARL	1.90748	1.01e-166	3.76e-165			AT3G28300	AT14A	-1.32859	1.78e-22	1.04e-21
AT1G65481	AT1G65481	1.90613	6.24e-07	1.84e-06			AT3G28740	CYP81D11	-1.91103	1.35e-65	1.79e-64
AT2G30550	AT2G30550	1.90565	2.74e-172	1.06e-170			AT3G28840	AT3G28840	-1.98428	0.000383999	0.000868081
AT1G23550	SRO2	1.90558	6.1e-42	5.55e-41			AT3G28960	AT3G28960	-2.27769	4.48e-08	1.44e-07
AT1G70260	AT1G70260	1.90181	2.2e-68	3.02e-67			AT3G29185	AT3G29185	-1.52409	3.92e-144	1.2e-142
AT3G42670	CLSY1	1.90061	3.77e-237	2.29e-235			AT3G29230	PCMP-E27	-1.15433	4.34e-29	3.02e-28
AT4G11910	SGR2	1.89909	5.94e-22	3.42e-21			AT3G29290	EMB2076	-1.3952	3.29e-59	3.99e-58
AT1G12805	AT1G12805	1.89861	1.01e-83	1.69e-82			AT3G29430	AT3G29430	-1.59039	0.00140025	0.00293933
AT5G48190	AT5G48190	1.89858	0.000614039	0.00135185			AT3G29580	AT3G29580	-1.74954	0.0126414	0.0228946
AT1G24010	AT1G24010	1.8983	0.0048202	0.00935416			AT3G29630	UGT79B4	-1.68783	1.45e-05	3.81e-05
AT1G02450	NIMIN-1	1.89791	5.12e-05	0.000127801			AT3G29670	PMAT2	-1.85247	2.48e-12	1.01e-11
AT1G23149	CPuORF29	1.89737	6.55e-26	4.22e-25			AT3G29780	RALFL27	-1.539	1.32e-05	3.47e-05
AT2G43570	CHI	1.89617	4.6e-44	4.38e-43			AT3G30460	AT3G30460	-1.22046	0.0109618	0.0200624
AT1G57570	JAL14	1.89512	5.4e-12	2.16e-11			AT3G30720	QQS	-3.18095	2.38e-59	2.89e-58
AT1G54870	AT1G54870	1.89437	1.79e-05	4.68e-05			AT3G30730	AT3G30730	-3.25346	3.17e-06	8.83e-06
AT2G28650	ATEXO70H8	1.89432	3.87e-22	2.24e-21			AT3G30875	AT3G30875	-1.13472	1.11e-08	3.72e-08
AT1G72590	AT1G72590	1.89355	0.00751635	0.0141185			AT3G42090	AT3G42090	-2.73812	0.000115857	0.00027894
AT4G32510	BOR7	1.89265	1.59e-24	9.87e-24			AT3G42792	AT3G42792	-1.97704	0.00530215	0.0102047
AT3G45800	AT3G45800	1.89134	0.00607329	0.0115809			AT3G42800	AT3G42800	-2.39434	3.12e-08	1.01e-07
AT1G15150	AT1G15150	1.89117	3.67e-26	2.38e-25			AT3G43540	AT3G43540	-1.16793	3.84e-62	4.85e-61
AT5G48100	TT10	1.89019	7.21e-08	2.28e-07			AT3G43670	AT3G43670	-2.2603	2.98e-190	1.31e-188
AT1G42490	AT1G42490	1.889	0.00753087	0.0141437			AT3G44020	AT3G44020	-1.51353	2.17e-16	1.04e-15
AT5G22470	PARP3	1.8884	0.00713406	0.0134412			AT3G44450	AT3G44450	-1.03027	1.01e-13	4.36e-13
AT1G22470	AT1G22470	1.88773	2.9e-20	1.59e-19			AT3G44890	RPL9	-1.65868	3.89e-289	3.33e-287
AT5G28000	AT5G28000	1.88499	0.00765081	0.0143537			AT3G44900	CHX4	-1.74887	0.00386059	0.00760816
AT5G63130	AT5G63130	1.88359	1.08e-62	1.38e-61			AT3G44960	AT3G44960	-1.93487	2.39e-11	9.26e-11
AT5G41610	CHX18	1.88348	3.95e-83	6.56e-82			AT3G44970	AT3G44970	-1.20632	1.9e-28	1.3e-27
AT5G40800	AT5G40800	1.88294	9.39e-05	0.000228217			AT3G45050	AT3G45050	-1.35615	3.91e-41	3.5e-40
AT1G35910	TPPD	1.88185	1.16e-48	1.18e-47			AT3G45070	SOT5	-3.20861	1.59e-49	1.64e-48
AT1G66860	AT1G66860	1.88121	1.46e-11	5.72e-11			AT3G45080	SOT6	-1.7216	0.000201344	0.000471071
AT4G27852	AT4G27852	1.88066	1.36e-16	6.57e-16			AT3G45095	AT3G45095	-1.70708	0.000113179	0.000272836
AT1G71770	PAB5	1.87946	1.99e-08	6.54e-08			AT3G45140	LOX2	-1.01905	1.71e-75	2.57e-74
AT5G06839	TGA10	1.87453	9.31e-45	8.97e-44			AT3G45160	AT3G45160	-1.31285	1.87e-41	1.69e-40
AT3G05980	AT3G05980	1.87244	8.53e-27	5.6e-26			AT3G45390	AT3G45390	-1.34725	0.00194788	0.00400274
AT3G27970	AT3G27970	1.87037	8.14e-07	2.38e-06			AT3G45680	NPF2.3	-1.54383	5.35e-08	1.71e-07
AT3G23170	AT3G23170	1.86947	3.34e-208	1.64e-206			AT3G45710	NPF2.5	-1.94465	1.68e-51	1.8e-50
AT3G25610	ALA10	1.86738	1.52e-217	7.95e-216			AT3G45940	XYL2	-4.22889	1.57e-10	5.84e-10
AT1G71520	ERF020	1.86626	3.65e-05	9.25e-05			AT3G46240	AT3G46240	-1.63982	0.0176797	0.0311917
AT5G17220	GSTF12	1.86525	7.15e-118	1.71e-116			AT3G46250	AT3G46250	-2.07863	0.000545058	0.00120955
AT5G25920	AT5G25920	1.86415	0.000303529	0.000694663			AT3G46270	AT3G46270	-2.6696	1.83e-13	7.8e-13
AT1G15840	AT1G15840	1.86414	0.00814571	0.0152084			AT3G46370	AT3G46370	-2.80077	4.42e-18	2.25e-17
AT1G61680	TPS14	1.86411	0.00783217	0.0146673			AT3G46490	AT3G46490	-1.21597	3.23e-22	1.88e-21
AT3G15320	AT3G15320	1.86263	0.00760294	0.0142747			AT3G46630	AT3G46630	-1.2073	7.46e-34	5.77e-33
AT2G47190	ATMYB2	1.86166	2.7e-16	1.29e-15			AT3G46650	AT3G46650	-1.58479	7.73e-08	2.45e-07
AT3G45060	NRT2.6	1.85968	0.00148587	0.00310695			AT3G46710	RPP13L2	-1.00821	0.014786	0.0264387
AT2G32660	AtRLP22	1.85928	1.01e-24	6.33e-24			AT3G46730	RPP13L3	-1.11932	0.00066223	0.00145111
AT3G57460	AT3G57460	1.85894	6.64e-08	2.11e-07			AT3G46740	TOC75-3	-1.0813	4.17e-118	1e-116
AT4G02650	AT4G02650	1.85832	0.000177086	0.000417032			AT3G46760	LECRKS3	-1.23014	0.0274731	0.0467453
AT5G41550	AT5G41550	1.85815	8.57e-15	3.87e-14			AT3G46780	PTAC16	-1.44674	2.09e-200	9.63e-199
AT1G61470	CAF1-5	1.8579	9.75e-13	4.04e-12			AT3G46800	AT3G46800	-2.24267	0.000124284	0.000297983
AT5G02200	FHL	1.85772	2.9e-51	3.1e-50			AT3G46810	AT3G46810	-1.08085	0.00339467	0.00673874
AT1G50610	PRK5	1.85617	0.00619587	0.0117974			AT3G46880	AT3G46880	-3.23743	3.73e-06	1.03e-05
AT5G24210	AT5G24210	1.85574	0	0			AT3G47070	AT3G47070	-1.73843	3.74e-33	2.86e-32
AT4G31940	CYP82C4	1.8553	3.99e-21	2.24e-20			AT3G47340	ASN1	-1.83555	5.3e-158	1.83e-156
AT3G57380	AT3G57380	1.85494	1.04e-37	8.68e-37			AT3G47430	PEX11B	-1.52014	6.22e-38	5.24e-37
AT1G19630	CYP722A1	1.85457	6.91e-19	3.61e-18			AT3G47450	NOA1	-1.30135	4.86e-71	6.91e-70
AT3G44300	NIT2	1.8538	2.54e-263	1.76e-261			AT3G47470	LHCA4	-1.16965	5.73e-282	4.55e-280
AT5G48180	NSP5	1.85375	0	0			AT3G47500	CDF3	-1.17776	9.26e-23	5.48e-22
AT5G57785	AT5G57785	1.85342	9.76e-99	1.93e-97			AT3G47580	AT3G47580	-2.43989	7.96e-06	2.14e-05
AT1G73540	NUDT21	1.85316	5.97e-112	1.35e-110			AT3G47620	TCP14	-1.68171	2.52e-64	3.28e-63
AT1G07747	AT1G07747	1.85312	0.00862245	0.0160538			AT3G47650	AT3G47650	-1.51635	2.45e-73	3.59e-72
AT4G35200	AT4G35200	1.85297	8.15e-06	2.19e-05			AT3G47760	ATATH4	-1.22153	0.0104362	0.0191699
AT5G09570	AT5G09570	1.85198	1.27e-58	1.53e-57			AT3G47860	CHL	-1.16743	6.51e-69	8.99e-68
AT5G24110	WRKY30	1.85193	6.21e-07	1.83e-06			AT3G48110	GLYRS-2	-1.25652	3.39e-105	7.16e-104
AT1G65730	YSL7	1.85163	1.82e-29	1.27e-28			AT3G48240	AT3G48240	-1.12636	0.00252746	0.0051127
AT5G28080	WNK9	1.85153	1.73e-13	7.42e-13			AT3G48280	CYP71A25	-1.74692	5.39e-30	3.83e-29
AT2G31865	PARG2	1.85065	6.52e-70	9.14e-69			AT3G48290	CYP71A24	-3.6171	1.44e-07	4.48e-07
AT5G10760	AT5G10760	1.85061	2.85e-38	2.42e-37			AT3G48320	CYP71A21	-1.79133	2.15e-64	2.81e-63
AT3G26818	MIR169M	1.85047	0.00206739	0.00423532			AT3G48360	BT2	-3.96587	0	0
AT1G05650	AT1G05650	1.85003	0.000198337	0.000464386			AT3G48390	AT3G48390	-1.21877	5.05e-07	1.51e-06
AT3G60961	AT3G60961	1.84982	1.86e-05	4.84e-05			AT3G48420	AT3G48420	-1.84632	1.32e-266	9.34e-265
AT1G72210	BHLH96	1.84982	6.09e-46	5.97e-45			AT3G48460	AT3G48460	-1.57439	1.78e-27	1.19e-26
AT1G14760	KNATM	1.84831	6.77e-06	1.83e-05			AT3G48500	PDE312	-1.23395	2.88e-133	7.93e-132
AT1G04560	AT1G04560	1.84811	0.00809784	0.0151282			AT3G48550	AT3G48550	-1.02438	0.000256523	0.000592391
AT1G14480	AT1G14480	1.84796	1.27e-38	1.08e-37			AT3G48720	AT3G48720	-2.66893	6.65e-91	1.21e-89
AT5G43620	PCFS5	1.84662	7.65e-17	3.73e-16			AT3G48730	GSA2	-1.67582	1.95e-253	1.31e-251
AT4G13345	MEE55	1.84606	2.37e-151	7.7e-150			AT3G48740	SWEET11	-1.99753	6.17e-302	5.64e-300
AT5G47740	AT5G47740	1.84525	4.07e-36	3.3e-35			AT3G48770	AT3G48770	-1.01957	0.00499545	0.00966926
AT4G25000	AMY1	1.84447	6.38e-65	8.4e-64			AT3G48940	AT3G48940	-1.7348	2.81e-05	7.19e-05
AT2G43890	AT2G43890	1.84406	0.00895577	0.0166331			AT3G49140	AT3G49140	-1.17822	1.07e-82	1.76e-81
AT3G20180	AT3G20180	1.84387	0.00896228	0.0166427			AT3G49160	PKP4	-1.13458	7.3e-19	3.81e-18
AT4G39830	AT4G39830	1.84235	1.95e-29	1.37e-28			AT3G49330	AT3G49330	-1.31953	0.000802804	0.00174081
AT4G32490	ENODL4	1.84016	0.00827759	0.0154454			AT3G49470	NACA2	-1.00925	8.61e-70	1.2e-68
AT1G58140	AT1G58140	1.84	9.85e-06	2.63e-05			AT3G49670	BAM2	-1.46397	1.42e-85	2.4e-84
AT1G32910	AT1G32910	1.83953	0.00973188	0.0179695			AT3G49750	AtRLP44	-1.35964	6.62e-10	2.38e-09
AT4G21850	MSRB9	1.83912	0	0			AT3G49760	AtbZIP5	-1.98895	9.74e-08	3.05e-07
AT4G37030	AT4G37030	1.83904	3.49e-24	2.15e-23			AT3G49900	AT3G49900	-1.16551	4.82e-08	1.55e-07
AT2G45510	CYP704A2	1.83741	1.01e-203	4.74e-202			AT3G49930	AT3G49930	-1.42158	5.12e-06	1.4e-05
AT5G26920	CBP60G	1.83672	2.64e-92	4.86e-91			AT3G49940	LBD38	-1.87752	1.04e-174	4.1e-173
AT3G12500	CHI-B	1.8319	1.66e-287	1.41e-285			AT3G49960	PER35	-1.32746	5.7e-67	7.73e-66
AT1G01680	PUB54	1.83157	6.55e-11	2.49e-10			AT3G50120	AT3G50120	-1.67124	1.93e-07	5.93e-07
AT1G76220	AT1G76220	1.83106	4.92e-08	1.58e-07			AT3G50240	KICP-02	-1.38594	2.07e-52	2.25e-51
AT1G61290	SYP124	1.83074	0.00322227	0.00642068			AT3G50270	AT3G50270	-2.93751	1.1e-119	2.68e-118
AT5G39720	AIG2L	1.83055	2.98e-07	9.03e-07			AT3G50300	AT3G50300	-1.37943	7.18e-13	2.99e-12
AT5G67340	PUB2	1.82936	3.07e-63	3.94e-62			AT3G50350	AT3G50350	-1.05665	2.95e-10	1.08e-09
AT5G64510	TIN1	1.82859	2.71e-53	2.99e-52			AT3G50450	HR1	-1.88094	0.00699529	0.0131954
AT2G23230	TPS05	1.82769	0.0099851	0.0184027			AT3G50630	KRP2	-1.13462	2.9e-15	1.34e-14
AT4G14080	A6	1.82701	0.010298	0.0189288			AT3G50685	AT3G50685	-1.95129	7.72e-60	9.48e-59
AT5G16080	CXE17	1.82692	3.26e-28	2.21e-27			AT3G50700	IDD2	-1.03784	5.45e-18	2.76e-17
AT4G27590	AT4G27590	1.82644	7.41e-09	2.5e-08			AT3G50740	UGT72E1	-1.74264	4.49e-187	1.94e-185
AT4G39210	APL3	1.82627	4.26e-229	2.43e-227			AT3G50750	BEH1	-2.30258	5.21e-70	7.3e-69
AT4G24380	AT4G24380	1.82565	6.97e-123	1.75e-121			AT3G50790	AT3G50790	-1.08247	2.62e-46	2.58e-45
AT5G47070	AT5G47070	1.82406	7.83e-104	1.63e-102			AT3G50820	PSBO2	-1.27069	3.59e-188	1.56e-186
AT2G42140	VQ17	1.82283	3.11e-05	7.94e-05			AT3G50840	AT3G50840	-2.78689	6.82e-34	5.28e-33
AT1G33960	AIG1	1.82189	7.29e-23	4.32e-22			AT3G51070	AT3G51070	-1.17091	0.000742629	0.00161869
AT1G23710	AT1G23710	1.82063	8.66e-121	2.14e-119			AT3G51080	GATA6	-2.14207	2.66e-20	1.46e-19
AT1G51530	AT1G51530	1.81892	0.00212461	0.00434534			AT3G51140	AT3G51140	-1.07405	5.75e-58	6.81e-57
AT2G43290	CML5	1.81545	3.35e-163	1.21e-161			AT3G51220	AT3G51220	-1.0421	0.00472887	0.00918845
AT3G14300	PME26	1.81242	0.00632041	0.0120207			AT3G51230	AT3G51230	-1.07778	1.32e-05	3.48e-05
AT1G07430	AIP1	1.8115	0.00026821	0.000617997			AT3G51300	ARAC11	-1.27258	0.0021901	0.00446748
AT1G15900	AT1G15900	1.8106	1.03e-06	2.98e-06			AT3G51340	AT3G51340	-1.28778	0.000145154	0.000345016
AT3G11340	AT3G11340	1.81036	2.8e-149	8.94e-148			AT3G51350	AT3G51350	-1.88573	2e-15	9.25e-15
AT3G20590	AT3G20590	1.81031	1.74e-18	8.98e-18			AT3G51400	AT3G51400	-2.21582	4.14e-22	2.39e-21
AT5G67080	MAPKKK19	1.81008	7.9e-64	1.02e-62			AT3G51420	SSL4	-1.39574	1.05e-91	1.93e-90
AT1G72720	AT1G72720	1.80987	6.65e-10	2.39e-09			AT3G51478	AT3G51478	-1.13059	0.0204188	0.0355857
AT5G03204	AT5G03204	1.80845	0.00608808	0.0116073			AT3G51710	AT3G51710	-1.16763	2.76e-06	7.73e-06
AT5G48670	AGL80	1.80722	9.49e-15	4.27e-14			AT3G51750	AT3G51750	-1.76448	9.53e-09	3.2e-08
AT3G45720	NPF2.1	1.80642	0.0109928	0.0201133			AT3G51760	AT3G51760	-1.42424	8.76e-11	3.3e-10
AT1G15405	AT1G15405	1.80528	8.28e-06	2.22e-05			AT3G51820	CHLG	-1.3115	4.17e-175	1.64e-173
AT1G74590	GSTU10	1.80457	1.41e-59	1.73e-58			AT3G51895	SULTR3	-3.83641	3.4e-111	7.66e-110
AT5G13205	AT5G13205	1.80133	5.06e-17	2.48e-16			AT3G52060	AT3G52060	-1.16129	9.03e-74	1.33e-72
AT2G27990	BLH8	1.80127	1.26e-20	6.99e-20			AT3G52070	AT3G52070	-1.23174	2.6e-06	7.3e-06
AT3G53450	LOG4	1.80111	3.9e-05	9.88e-05			AT3G52110	AT3G52110	-1.13646	3.12e-21	1.76e-20
AT1G56170	NFYC2	1.80101	7.67e-108	1.67e-106			AT3G52150	AT3G52150	-1.51004	5.77e-140	1.7e-138
AT3G09405	PAE4	1.80031	9.89e-36	7.96e-35			AT3G52380	CP33	-1.269	2.33e-209	1.15e-207
AT4G26930	MYB97	1.80007	0.00458552	0.00893444			AT3G52480	AT3G52480	-1.27541	1.95e-11	7.58e-11
AT5G52750	AT5G52750	1.79968	1.15e-55	1.31e-54			AT3G52540	OFP18	-1.7121	6.89e-09	2.33e-08
AT3G15990	SULTR3	1.79854	1.33e-91	2.43e-90			AT3G52550	AT3G52550	-1.9447	0.000110973	0.000267754
AT1G67265	DVL3	1.79744	6.18e-29	4.27e-28			AT3G52740	AT3G52740	-1.36194	2.12e-13	9.04e-13
AT2G37770	AKR4C9	1.79532	2.79e-43	2.62e-42			AT3G52910	GRF4	-1.48588	6.61e-17	3.23e-16
AT5G51440	HSP23.5	1.79529	3.84e-168	1.44e-166			AT3G53130	CYP97C1	-1.48346	5.05e-99	1.01e-97
AT3G44840	AT3G44840	1.79509	0.0095646	0.0176843			AT3G53170	AT3G53170	-1.15208	5.83e-12	2.33e-11
AT4G33040	GRXC6	1.79433	4.72e-39	4.05e-38			AT3G53460	CP29A	-1.81374	0	0
AT4G26390	AT4G26390	1.79195	0.0117343	0.0213815			AT3G53530	NAKR3	-2.12108	1.79e-34	1.41e-33
AT2G25510	AT2G25510	1.79148	2.98e-141	8.89e-140			AT3G53680	AT3G53680	-1.35267	2.55e-15	1.17e-14
AT1G02390	GPAT2	1.79138	6.5e-20	3.51e-19			AT3G53700	MEE40	-1.13999	7.57e-36	6.12e-35
AT1G09090	RBOHB	1.79096	1.3e-135	3.68e-134			AT3G53720	CHX20	-1.50797	1.83e-34	1.44e-33
AT3G20500	PAP18	1.78974	1.8e-220	9.69e-219			AT3G53800	Fes1B	-2.39271	1.03e-106	2.23e-105
AT5G46013	AT5G46013	1.78916	0.0121161	0.0220238			AT3G53820	AT3G53820	-1.85891	0.00461484	0.0089852
AT2G18590	AT2G18590	1.78879	8.74e-05	0.000213398			AT3G53920	SIGC	-1.10202	6.39e-56	7.32e-55
AT5G09800	PUB28	1.78847	3.73e-45	3.62e-44			AT3G53960	NPF5.7	-2.92515	1.33e-62	1.7e-61
AT1G66490	AT1G66490	1.78818	0.0109809	0.0200959			AT3G54050	FBP	-1.43068	1.62e-239	9.91e-238
AT1G32870	NAC13	1.78762	3.57e-143	1.09e-141			AT3G54090	FLN1	-1.27259	2.04e-105	4.33e-104
AT1G76970	AT1G76970	1.78756	9.13e-118	2.18e-116			AT3G54210	RPL17	-1.35974	9.8e-218	5.16e-216
AT1G11330	AT1G11330	1.78695	3.51e-235	2.09e-233			AT3G54580	AT3G54580	-1.0439	1.12e-11	4.42e-11
AT5G27060	AtRLP53	1.7864	1.72e-09	6.06e-09			AT3G54710	CDT1B	-1.21483	8.25e-16	3.87e-15
AT4G34332	AT4G34332	1.78631	0.0107116	0.0196422			AT3G54730	AT3G54730	-1.92926	0.000403641	0.000910406
AT2G26135	AT2G26135	1.78551	0.0110754	0.0202524			AT3G54880	AT3G54880	-1.00757	1.71e-33	1.31e-32
AT1G53610	AT1G53610	1.78509	0.000795895	0.00172644			AT3G54890	LHCA1	-1.47897	0	0
AT5G39050	PMAT1	1.78402	3.37e-180	1.38e-178			AT3G54900	GRXS14	-1.21166	1.39e-65	1.85e-64
AT3G27480	AT3G27480	1.78397	0.000125513	0.000300697			AT3G55040	GSTL2	-1.14436	1.14e-62	1.45e-61
AT1G17030	AT1G17030	1.78364	2.79e-12	1.13e-11			AT3G55130	ABCG19	-1.62464	1.42e-101	2.91e-100
AT3G60550	CYCU2-2	1.78351	2.84e-24	1.75e-23			AT3G55250	AT3G55250	-1.28247	2.81e-80	4.53e-79
AT1G07870	AT1G07870	1.78316	4.33e-148	1.36e-146			AT3G55290	AT3G55290	-1.1054	1.57e-14	7.01e-14
AT3G05500	AT3G05500	1.78232	3.19e-183	1.34e-181			AT3G55330	PPL1	-1.777	4.29e-133	1.18e-131
AT1G62790	AT1G62790	1.77945	1.23e-194	5.57e-193			AT3G55580	AT3G55580	-1.37892	0.0226506	0.0391502
AT3G55950	CCR3	1.77905	9.93e-55	1.12e-53			AT3G55630	FPGS3	-3.41904	0	0
AT5G60800	AT5G60800	1.77876	6.61e-93	1.22e-91			AT3G55660	ROPGEF6	-1.03325	4.44e-15	2.03e-14
AT3G60470	AT3G60470	1.77826	0.011289	0.0206218			AT3G55700	UGT76F1	-2.02654	8.88e-07	2.59e-06
AT5G20670	AT5G20670	1.77801	1.42e-07	4.4e-07			AT3G55710	UGT76F2	-3.61529	9.01e-35	7.12e-34
AT1G63020	NRPD1	1.77603	7.91e-112	1.79e-110			AT3G55760	AT3G55760	-1.51275	1.55e-45	1.51e-44
AT2G47630	AT2G47630	1.77593	5.97e-119	1.45e-117			AT3G55800	SBPASE	-1.40597	0	0
AT4G13790	AT4G13790	1.77581	0.0114	0.0208107			AT3G55940	PLC7	-1.42314	2.64e-07	8.04e-07
AT3G46330	MEE39	1.7749	5.09e-25	3.2e-24			AT3G56010	AT3G56010	-1.22666	7.18e-56	8.22e-55
AT5G03350	AT5G03350	1.77275	6.78e-64	8.79e-63			AT3G56080	AT3G56080	-1.69937	2.15e-27	1.43e-26
AT2G30660	AT2G30660	1.77205	6.66e-10	2.39e-09			AT3G56100	MRLK	-1.05341	5.24e-08	1.67e-07
AT4G18980	AtS40-3	1.76963	0.000769575	0.00167286			AT3G56290	AT3G56290	-1.38449	1.13e-23	6.89e-23
AT5G25190	ERF003	1.76892	1.29e-76	1.97e-75			AT3G56330	AT3G56330	-1.94979	6.84e-43	6.33e-42
AT3G62720	XXT1	1.76869	1.84e-178	7.42e-177			AT3G56620	AT3G56620	-1.06226	1.47e-12	6.05e-12
AT3G57880	AT3G57880	1.76653	9.14e-216	4.73e-214			AT3G56650	PPD6	-1.50432	4.15e-92	7.63e-91
AT5G22555	AT5G22555	1.76489	1.53e-07	4.73e-07			AT3G56730	AT3G56730	-2.91067	3e-12	1.21e-11
AT2G29490	GSTU1	1.76462	6.81e-108	1.49e-106			AT3G56810	AT3G56810	-1.13349	6.03e-15	2.74e-14
AT5G42050	AT5G42050	1.76433	2.2e-266	1.55e-264			AT3G56910	PSRP5	-1.58766	2.2e-91	4.02e-90
AT1G64740	TUBA1	1.76271	7.25e-166	2.66e-164			AT3G56940	CRD1	-1.33251	1.79e-167	6.7e-166
AT2G48010	RKF3	1.76222	1.79e-61	2.25e-60			AT3G57180	BPG2	-1.50788	3.76e-40	3.3e-39
AT4G15330	CYP705A1	1.76117	4.34e-70	6.1e-69			AT3G57190	PRFB3	-1.01828	5.4e-23	3.21e-22
AT3G45920	AT3G45920	1.7593	0.0021408	0.0043752			AT3G57430	PCMP-H81	-1.03674	5.99e-16	2.82e-15
AT1G66480	AT1G66480	1.75917	4.84e-66	6.46e-65			AT3G57500	AT3G57500	-1.28601	0.00167504	0.00348164
AT3G29590	5MAT	1.75684	7.22e-34	5.59e-33			AT3G57540	AT3G57540	-1.49533	6.93e-10	2.49e-09
AT5G24030	SLAH3	1.75671	1.34e-141	4.01e-140			AT3G57770	AT3G57770	-1.06468	4.2e-08	1.36e-07
AT1G15170	AT1G15170	1.75643	2.48e-90	4.46e-89			AT3G57830	AT3G57830	-1.25162	2.21e-09	7.71e-09
AT5G03150	JKD	1.75635	9.24e-92	1.69e-90			AT3G57920	SPL15	-1.45541	0.000153885	0.000364719
AT1G17240	RLP2	1.75628	3.25e-12	1.31e-11			AT3G58070	GIS	-3.24874	8.87e-10	3.16e-09
AT1G66830	AT1G66830	1.75628	2.93e-17	1.45e-16			AT3G58430	AT3G58430	-1.51659	1.07e-10	4.04e-10
AT1G48060	AT1G48060	1.75625	0.000532721	0.00118376			AT3G58830	AT3G58830	-1.3398	1.32e-38	1.13e-37
AT5G13190	AT5G13190	1.75558	3.06e-113	7.04e-112			AT3G59040	AT3G59040	-1.39179	5.39e-102	1.11e-100
AT1G13750	PAP1	1.75558	2.08e-180	8.55e-179			AT3G59230	AT3G59230	-3.62158	1.24e-07	3.87e-07
AT1G04445	AT1G04445	1.75405	0.00249503	0.00505164			AT3G59250	AT3G59250	-4.52052	1.26e-31	9.29e-31
AT1G65510	AT1G65510	1.75338	2.02e-16	9.68e-16			AT3G59340	AT3G59340	-1.00128	0.00256794	0.00519163
AT2G44910	ATHB-4	1.75275	3.84e-09	1.32e-08			AT3G59400	GUN4	-1.28207	6.92e-78	1.08e-76
AT5G67310	CYP81G1	1.75266	9.7e-06	2.59e-05			AT3G59510	AT3G59510	-1.4644	0.00421521	0.00826101
AT1G72490	AT1G72490	1.7515	8.56e-17	4.17e-16			AT3G59780	AT3G59780	-1.28101	1.52e-149	4.87e-148
AT3G22550	AT3G22550	1.74786	9.04e-183	3.77e-181			AT3G59790	MPK10	-3.28875	2.51e-06	7.07e-06
AT5G26690	AT5G26690	1.74773	9.16e-06	2.45e-05			AT3G59940	SKIP20	-1.36395	8.82e-155	2.95e-153
AT4G22212	AT4G22212	1.74758	2.67e-57	3.14e-56			AT3G59980	AT3G59980	-1.01569	1.08e-39	9.44e-39
AT1G61840	AT1G61840	1.7461	1.9e-09	6.66e-09			AT3G60160	ABCC9	-1.10259	2.74e-19	1.45e-18
AT4G30880	AT4G30880	1.74502	0.0139632	0.0250794			AT3G60280	UCC3	-1.60039	1.89e-15	8.75e-15
AT4G17680	AT4G17680	1.74389	1.63e-44	1.56e-43			AT3G60370	FKBP20-2	-1.30755	1.58e-46	1.56e-45
AT3G57240	BG3	1.74209	2.95e-10	1.08e-09			AT3G60390	HAT3	-1.31007	1.02e-18	5.33e-18
AT3G27400	AT3G27400	1.7416	7.62e-89	1.35e-87			AT3G60440	AT3G60440	-1.18067	6.16e-34	4.78e-33
AT5G13820	TRP4	1.74006	1.82e-79	2.89e-78			AT3G60620	CDS5	-1.0724	7.25e-30	5.14e-29
AT1G73260	ATKTI1	1.73944	0	0			AT3G60700	AT3G60700	-2.31557	0.000687895	0.00150482
AT1G32170	XTH30	1.73866	3.51e-88	6.14e-87			AT3G60750	TKL-1	-1.11122	2.07e-132	5.67e-131
AT5G16200	AT5G16200	1.73803	2.71e-41	2.44e-40			AT3G60900	FLA10	-1.32766	2.74e-15	1.27e-14
AT4G21120	CAT1	1.73622	2.08e-23	1.25e-22			AT3G61060	PP2A13	-2.83242	8.97e-293	7.88e-291
AT5G02170	AT5G02170	1.73585	5.51e-31	4.03e-30			AT3G61080	AT3G61080	-1.02413	3.89e-26	2.52e-25
AT4G39403	PLS	1.73585	0.00874558	0.0162671			AT3G61210	AT3G61210	-1.52184	3e-42	2.74e-41
AT1G80820	CCR2	1.73479	4.56e-30	3.25e-29			AT3G61470	LHCA2	-1.0953	9.2e-213	4.65e-211
AT5G48090	ELP1	1.73379	2.89e-14	1.28e-13			AT3G61510	ACS1	-1.75223	0.0126014	0.0228306
AT1G52410	TSA1	1.73276	2.67e-297	2.39e-295			AT3G61750	AT3G61750	-1.18114	1.39e-13	5.98e-13
AT2G45900	AT2G45900	1.73255	1.87e-28	1.28e-27			AT3G61840	AT3G61840	-3.64397	1.35e-09	4.78e-09
AT1G30135	TIFY5A	1.73237	1.5e-30	1.08e-29			AT3G61870	AT3G61870	-1.19155	2.1e-117	5e-116
AT4G25390	AT4G25390	1.73217	8.23e-77	1.26e-75			AT3G61900	AT3G61900	-1.55418	0.00207978	0.00425929
AT3G16980	NRPB9A	1.73116	5.25e-09	1.79e-08			AT3G61920	AT3G61920	-2.37755	1.12e-06	3.25e-06
AT3G57450	AT3G57450	1.73088	2.8e-87	4.86e-86			AT3G61950	BHLH67	-2.19413	3.45e-09	1.19e-08
AT3G60650	AT3G60650	1.72999	4.1e-05	0.000103602			AT3G61970	NGA2	-1.26172	9.94e-05	0.000241088
AT5G49690	UGT91C1	1.72978	7.55e-14	3.28e-13			AT3G62000	AT3G62000	-1.13873	3.66e-16	1.74e-15
AT5G24200	AT5G24200	1.72937	1.09e-20	6.02e-20			AT3G62030	CYP20-3	-1.44901	2.61e-218	1.38e-216
AT4G28340	AT4G28340	1.72927	0.015184	0.0270817			AT3G62160	AT3G62160	-1.22691	3.85e-07	1.16e-06
AT4G24110	AT4G24110	1.72907	7.14e-175	2.81e-173			AT3G62270	BOR2	-1.11882	2.47e-77	3.83e-76
AT3G59720	AT3G59720	1.72901	0.00795014	0.0148736			AT3G62390	TBL6	-1.04639	4.5e-18	2.29e-17
AT3G14440	NCED3	1.72846	6.31e-13	2.64e-12			AT3G62410	CP12-2	-2.33811	1.75e-220	9.48e-219
AT3G08720	ATPK2	1.72844	4.45e-172	1.72e-170			AT3G62550	AT3G62550	-5.34563	0	0
AT4G12170	AT4G12170	1.72836	0.00673784	0.0127509			AT3G62680	PRP3	-1.07521	4.92e-27	3.26e-26
AT5G64570	BXL4	1.72822	6.86e-256	4.66e-254			AT3G62740	BGLU7	-3.16453	5.09e-31	3.72e-30
AT4G15150	AT4G15150	1.72802	1.14e-23	6.93e-23			AT3G62750	BGLU8	-2.12857	0	0
AT5G24070	PER61	1.72793	3.48e-11	1.34e-10			AT3G62910	APG3	-1.44072	2.76e-69	3.84e-68
AT2G23810	TET8	1.72779	9.74e-194	4.38e-192			AT3G62930	GRXS6	-2.60015	1.93e-28	1.31e-27
AT5G02580	AT5G02580	1.72608	8.99e-28	6.06e-27			AT3G62950	GRXC11	-4.30427	2.24e-14	9.94e-14
AT1G49000	AT1G49000	1.72553	4.16e-09	1.43e-08			AT3G62960	GRXC14	-1.57964	0.0258205	0.0441334
AT3G28850	AT3G28850	1.7249	9.56e-41	8.53e-40			AT3G63088	RTFL14	-1.47385	0.00747847	0.0140559
AT5G40540	AT5G40540	1.72475	1.05e-78	1.66e-77			AT3G63110	IPT3	-1.24977	3.35e-27	2.22e-26
AT5G47230	ERF5	1.72427	1.38e-121	3.44e-120			AT3G63140	CSP41A	-1.85617	5.7e-263	3.95e-261
AT1G50110	BCAT6	1.72271	1.53e-98	3e-97			AT3G63160	AT3G63160	-1.42428	9.34e-85	1.58e-83
AT2G30580	DRIP2	1.72249	1.55e-126	4.03e-125			AT3G63190	RRF	-1.55491	1.89e-211	9.52e-210
AT1G74990	AT1G74990	1.72219	0.0139298	0.0250214			AT3G63200	PLP9	-1.00962	1.41e-34	1.11e-33
AT1G76965	AT1G76965	1.71898	0.0140352	0.0251979			AT3G63370	OTP86	-1.0083	3.3e-10	1.21e-09
AT3G12740	ALIS1	1.718	0	0			AT3G63450	AT3G63450	-1.2706	3.03e-13	1.28e-12
AT2G38510	AT2G38510	1.71767	0.0149204	0.0266557			AT3G63470	SCPL40	-1.02133	7.97e-07	2.33e-06
AT5G33390	AT5G33390	1.71557	0.00877324	0.0163173			AT3G63490	RPL1	-1.68568	1.32e-285	1.1e-283
AT4G27980	AT4G27980	1.71554	1.18e-07	3.68e-07			AT3G63510	AT3G63510	-1.76051	3.78e-75	5.67e-74
AT5G53820	AT5G53820	1.71324	1.43e-65	1.89e-64			AT4G00165	AT4G00165	-2.27019	1.91e-105	4.06e-104
AT5G37900	AT5G37900	1.71273	0.014453	0.0258767			AT4G00370	PHT4	-1.29999	1.69e-135	4.76e-134
AT2G28080	UGT86A2	1.71216	2.51e-139	7.36e-138			AT4G00400	GPAT8	-2.32465	3.37e-125	8.65e-124
AT4G02970	AT7SL-1	1.7113	8.27e-42	7.51e-41			AT4G00780	AT4G00780	-1.88673	8.63e-277	6.64e-275
AT1G10586	AT1G10586	1.71004	0.0122978	0.0223344			AT4G00890	AT4G00890	-1.67597	1.01e-07	3.18e-07
AT5G59530	AT5G59530	1.70981	1.06e-35	8.54e-35			AT4G00970	CRK41	-1.04073	3.03e-12	1.22e-11
AT2G46950	CYP709B2	1.7098	3.65e-16	1.74e-15			AT4G01026	PYL7	-1.38931	6.12e-43	5.68e-42
AT4G22730	AT4G22730	1.70963	2.49e-60	3.07e-59			AT4G01037	WTF1	-1.71002	1.56e-158	5.39e-157
AT1G52470	AT1G52470	1.70951	0.000118761	0.000285598			AT4G01080	TBL26	-1.00063	2.68e-07	8.16e-07
AT3G04717	AT3G04717	1.70946	0.00382946	0.00755341			AT4G01130	AT4G01130	-1.98695	2.06e-38	1.75e-37
AT4G14630	GLP9	1.70918	9.02e-28	6.08e-27			AT4G01150	CURT1A	-1.38129	1.18e-113	2.72e-112
AT5G11160	APT5	1.70865	1.95e-64	2.55e-63			AT4G01310	RPL5	-1.67226	0	0
AT1G56240	PP2B13	1.70733	1.6e-25	1.02e-24			AT4G01380	AT4G01380	-1.74963	0.000626227	0.00137626
AT5G60470	IDD13	1.70561	3.04e-06	8.48e-06			AT4G01390	AT4G01390	-1.92473	5.05e-41	4.53e-40
AT2G23030	SRK2J	1.70404	9.83e-101	2e-99			AT4G01490	AT4G01490	-2.1637	0.000590679	0.00130343
AT4G12400	HOP3	1.70307	1.58e-135	4.46e-134			AT4G01670	AT4G01670	-1.90022	2.31e-33	1.77e-32
AT3G44550	FAR5	1.70249	2.06e-73	3.02e-72			AT4G01800	SECA1	-1.04218	1.83e-90	3.29e-89
AT4G27850	AT4G27850	1.70241	3.67e-09	1.26e-08			AT4G01830	ABCB5	-1.70407	3.44e-05	8.76e-05
AT3G47040	AT3G47040	1.70053	2.87e-15	1.32e-14			AT4G01840	TPK5	-1.09913	4.14e-13	1.74e-12
AT1G30040	GA2OX2	1.70029	3.06e-58	3.65e-57			AT4G01883	AT4G01883	-1.26662	5.35e-28	3.62e-27
AT3G13650	DIR7	1.6982	6.33e-69	8.75e-68			AT4G01915	AT4G01915	-2.21638	3.13e-19	1.65e-18
AT1G63720	AT1G63720	1.69765	2.32e-39	2e-38			AT4G01930	AT4G01930	-1.29699	0.0219799	0.03806
AT3G19240	AT3G19240	1.69738	4.59e-161	1.62e-159			AT4G01935	AT4G01935	-1.30563	1.82e-20	9.99e-20
AT5G18320	PUB46	1.69717	0.000209696	0.000489408			AT4G01970	RFS4	-1.11046	0.00693785	0.0130994
AT2G46990	IAA20	1.69672	0.000220999	0.000514287			AT4G02290	AtGH9B13	-1.30637	2.06e-71	2.94e-70
AT1G28640	AT1G28640	1.69588	0.0155496	0.0276663			AT4G02510	TOC159	-1.25318	3.04e-130	8.17e-129
AT4G36988	CPuORF49	1.69499	7.27e-117	1.71e-115			AT4G02725	AT4G02725	-1.01901	1.79e-37	1.49e-36
AT5G10040	AT5G10040	1.69429	2.49e-18	1.28e-17			AT4G02770	PSAD1	-1.16905	5.04e-192	2.24e-190
AT5G46500	AT5G46500	1.6941	8.2e-10	2.93e-09			AT4G02790	DGP3	-1.76779	5.28e-163	1.91e-161
AT4G21390	B120	1.69384	8.76e-76	1.32e-74			AT4G02850	AT4G02850	-2.32702	5.5e-36	4.46e-35
AT4G11350	AT4G11350	1.69253	1.61e-26	1.05e-25			AT4G02990	AT4G02990	-1.58106	1.49e-142	4.48e-141
AT3G55840	HSPRO1	1.69237	1.28e-17	6.39e-17			AT4G03100	ROPGAP2	-1.14666	9.43e-23	5.58e-22
AT2G43120	AT2G43120	1.69236	8.33e-54	9.25e-53			AT4G03150	AT4G03150	-1.5778	2.57e-43	2.41e-42
AT1G05575	AT1G05575	1.69169	1.58e-44	1.52e-43			AT4G03280	PETC	-1.29262	1.31e-244	8.3e-243
AT5G48350	AT5G48350	1.69134	0.0155497	0.0276663			AT4G03400	DFL2	-1.26344	1.89e-41	1.71e-40
AT3G50760	GATL2	1.69134	4e-28	2.71e-27			AT4G03510	RMA1	-2.0721	1.23e-136	3.5e-135
AT1G70170	MMP	1.69117	2.41e-21	1.36e-20			AT4G03520	ATHM2	-1.26684	1.44e-151	4.7e-150
AT5G17850	CCX2	1.6899	2.44e-42	2.24e-41			AT4G03816	AT4G03816	-1.45982	0.0293351	0.0496237
AT3G15210	ERF4	1.68784	7.85e-292	6.82e-290			AT4G03930	PME42	-1.56928	0.0130306	0.0235517
AT4G24310	AT4G24310	1.6867	3.18e-20	1.73e-19			AT4G04330	AT4G04330	-1.55084	3.02e-47	3.03e-46
AT3G05830	AT3G05830	1.6861	1.98e-59	2.41e-58			AT4G04350	EMB2369	-1.46817	1.07e-107	2.33e-106
AT4G15100	SCPL30	1.68551	0.000310375	0.000709675			AT4G04450	WRKY42	-1.85354	2.08e-07	6.36e-07
AT3G44440	AT3G44440	1.6855	0.0181733	0.0319805			AT4G04640	ATPC1	-1.34192	0	0
AT1G25530	AT1G25530	1.68446	5.42e-89	9.58e-88			AT4G04692	AT4G04692	-1.47586	2.42e-65	3.2e-64
AT4G01895	AT4G01895	1.68342	9.83e-16	4.61e-15			AT4G04750	AT4G04750	-1.00475	7.37e-13	3.07e-12
AT3G46930	AT3G46930	1.68304	1.78e-70	2.51e-69			AT4G04850	KEA3	-1.41175	2.4e-95	4.55e-94
AT2G26310	FAP2	1.68297	1.15e-24	7.2e-24			AT4G04930	DES-1-LIKE	-2.24982	0.00160863	0.0033509
AT3G51430	SSL5	1.68279	2.12e-92	3.9e-91			AT4G05100	AtMYB74	-1.16215	0.000368528	0.000834935
AT3G17110	AT3G17110	1.68216	9.29e-21	5.16e-20			AT4G05120	ENT3	-1.34956	3.94e-15	1.81e-14
AT5G52760	AT5G52760	1.68152	2.5e-19	1.32e-18			AT4G05180	PSBQ2	-1.22184	1.12e-256	7.63e-255
AT5G01225	AT5G01225	1.6798	0.000511928	0.00114083			AT4G05330	AGD13	-1.10719	6.58e-20	3.55e-19
AT1G22170	AT1G22170	1.67933	6.01e-117	1.42e-115			AT4G05380	AT4G05380	-2.60419	9.25e-05	0.000225063
AT1G26680	REM17	1.67825	3.24e-14	1.43e-13			AT4G06534	AT4G06534	-1.09144	0.0049299	0.00955209
AT1G79800	ENODL7	1.67608	0.013417	0.0241862			AT4G06536	AT4G06536	-1.54139	0.00188937	0.00389089
AT1G29640	AT1G29640	1.67604	1.03e-23	6.24e-23			AT4G07400	FBL8	-1.38459	7.07e-09	2.39e-08
AT1G66320	AT1G66320	1.67564	0.000198606	0.000464928			AT4G08300	AT4G08300	-1.68789	1.18e-19	6.33e-19
AT3G27250	AT3G27250	1.6752	0.00954171	0.0176468			AT4G08400	AT4G08400	-1.35191	6.41e-36	5.19e-35
AT4G20210	TPS08	1.67468	7.28e-12	2.89e-11			AT4G08410	AT4G08410	-1.51999	1.36e-59	1.67e-58
AT5G59320	LTP3	1.67461	1.23e-87	2.15e-86			AT4G08910	AT4G08910	-1.01583	0.0217516	0.0376884
AT1G35625	AT1G35625	1.674	8.69e-08	2.74e-07			AT4G09010	TL29	-1.36617	1.17e-217	6.11e-216
AT1G61890	AT1G61890	1.67398	1.8e-217	9.37e-216			AT4G09040	AT4G09040	-1.66124	9.57e-135	2.68e-133
AT2G43660	AT2G43660	1.67395	4.32e-08	1.39e-07			AT4G09350	ndhT	-2.11789	9.96e-36	8.02e-35
AT5G49330	MYB111	1.6739	1.83e-20	1e-19			AT4G09460	MYB6	-1.11046	4.29e-19	2.26e-18
AT3G13100	ABCC7	1.67072	2.16e-53	2.38e-52			AT4G09480	AT4G09480	-1.77549	0.00356291	0.00705479
AT4G27450	AT4G27450	1.66906	6.81e-210	3.37e-208			AT4G09510	CINV2	-1.31372	6.44e-51	6.84e-50
AT2G47015	MIR408	1.66893	5.17e-26	3.34e-25			AT4G09650	ATPD	-1.42775	3.33e-289	2.87e-287
AT3G59740	LECRK57	1.66837	0.00137914	0.00289893			AT4G10060	AT4G10060	-1.7293	2.14e-140	6.32e-139
AT1G74205	AT1G74205	1.66797	6.13e-07	1.81e-06			AT4G10150	ATL7	-2.57718	9.76e-05	0.000236804
AT5G06860	PGIP1	1.6643	9.54e-110	2.13e-108			AT4G10160	ATL59	-2.02141	0.00443356	0.00866084
AT1G14170	AT1G14170	1.6639	1.91e-161	6.75e-160			AT4G10340	LHCB5	-1.25791	1.59e-242	9.96e-241
AT3G51810	EM1	1.6636	0.00643921	0.0122231			AT4G10600	AT4G10600	-1.41154	6.2e-05	0.000153422
AT3G01175	AT3G01175	1.66304	4.98e-08	1.59e-07			AT4G10780	AT4G10780	-1.45213	0.00796515	0.014896
AT1G72950	AT1G72950	1.66143	2.16e-13	9.19e-13			AT4G10910	AT4G10910	-2.26842	2.46e-08	8.05e-08
AT5G15940	AT5G15940	1.66042	4e-14	1.76e-13			AT4G11100	AT4G11100	-1.09271	6.36e-34	4.93e-33
AT1G78760	AT1G78760	1.65781	0.0119818	0.0217925			AT4G11140	CRF1	-1.4616	3.72e-07	1.12e-06
AT5G39785	AT5G39785	1.65619	2.62e-35	2.09e-34			AT4G11175	AT4G11175	-1.73338	2.22e-78	3.5e-77
AT4G08770	PER37	1.6561	2.23e-303	2.07e-301			AT4G11190	DIR13	-1.14487	3.57e-12	1.44e-11
AT1G42980	FH12	1.65588	0.0192174	0.033672			AT4G11210	DIR14	-1.18081	3.09e-06	8.6e-06
AT1G47890	AtRLP7	1.65549	3.06e-05	7.81e-05			AT4G11211	AT4G11211	-2.04888	2.3e-28	1.56e-27
AT1G54100	ALDH7B4	1.65529	0	0			AT4G11330	MPK5	-1.07969	2.76e-18	1.42e-17
AT3G50290	AT3G50290	1.65509	0.00694908	0.0131186			AT4G11360	RHA1B	-1.04559	5.28e-28	3.58e-27
AT1G17020	SRG1	1.65468	4.84e-87	8.37e-86			AT4G11460	CRK30	-2.31711	3.94e-78	6.18e-77
AT1G62840	AT1G62840	1.65414	1.87e-06	5.32e-06			AT4G11720	HAP2	-1.38452	0.0266444	0.0454569
AT3G01420	DOX1	1.65414	1.61e-267	1.14e-265			AT4G11900	AT4G11900	-1.23521	2.57e-22	1.5e-21
AT2G26370	AT2G26370	1.65363	5.8e-20	3.13e-19			AT4G12030	BASS5	-1.27046	3.47e-81	5.63e-80
AT3G12910	AT3G12910	1.65359	0.0190473	0.0334023			AT4G12270	AT4G12270	-1.99673	1.45e-07	4.5e-07
AT4G00690	ULP1B	1.65253	1.9e-14	8.45e-14			AT4G12310	CYP706A5	-1.43185	5.66e-56	6.5e-55
AT5G43580	AT5G43580	1.65237	3.59e-78	5.64e-77			AT4G12320	CYP706A6	-5.19472	0	0
AT4G08040	ACS11	1.65157	8.4e-15	3.79e-14			AT4G12330	CYP706A7	-1.00932	3.1e-05	7.91e-05
AT5G11650	AT5G11650	1.65152	8.22e-96	1.57e-94			AT4G12430	TPPF	-5.01821	1.29e-15	6.03e-15
AT5G44568	AT5G44568	1.64906	8.7e-37	7.16e-36			AT4G12432	CPuORF26	-1.89089	6.71e-11	2.55e-10
AT3G20140	CYP705A23	1.64798	0.0113544	0.020732			AT4G12530	AT4G12530	-1.82368	0.00970141	0.0179185
AT2G36724	AT2G36724	1.64703	0.0181357	0.0319212			AT4G12800	PSAL	-1.21492	7.83e-283	6.38e-281
AT2G20560	AT2G20560	1.6469	2.76e-144	8.5e-143			AT4G12830	AT4G12830	-1.68998	9.13e-64	1.18e-62
AT2G30070	POT1	1.64686	3.07e-112	7.01e-111			AT4G12900	AT4G12900	-3.40259	1.57e-58	1.88e-57
AT2G31880	SOBIR1	1.64666	2.38e-201	1.1e-199			AT4G12917	AT4G12917	-2.25462	2.83e-24	1.75e-23
AT4G36430	PER49	1.64651	2.68e-111	6.04e-110			AT4G12970	EPFL9	-1.76842	1.77e-28	1.21e-27
AT1G17990	AT1G17990	1.64623	1.8e-106	3.86e-105			AT4G12980	AT4G12980	-1.94393	7.18e-52	7.76e-51
AT5G64310	AGP1	1.64597	4.81e-209	2.37e-207			AT4G13100	AT4G13100	-1.75882	4.49e-35	3.57e-34
AT4G01010	CNGC13	1.64592	7.11e-64	9.21e-63			AT4G13280	ATTPS12	-2.398	2.06e-17	1.03e-16
AT1G18740	AT1G18740	1.64528	1.72e-169	6.52e-168			AT4G13290	CYP71A19	-1.02567	8.28e-09	2.79e-08
AT1G50050	AT1G50050	1.64418	1.37e-05	3.62e-05			AT4G13390	AT4G13390	-1.45864	2.12e-58	2.54e-57
AT3G42658	SADHU3-2	1.6438	5.67e-07	1.68e-06			AT4G13410	CSLA15	-2.41938	1.74e-70	2.47e-69
AT1G27730	ZAT10	1.64359	5.49e-164	2e-162			AT4G13500	AT4G13500	-1.69984	4.2e-62	5.3e-61
AT4G13110	AT4G13110	1.64315	8.54e-41	7.62e-40			AT4G13600	AT4G13600	-1.09637	0.00138416	0.00290827
AT1G63090	PP2A11	1.64299	6.54e-113	1.5e-111			AT4G13620	ERF062	-1.07951	0.000486856	0.0010876
AT3G13520	AGP12	1.64211	4.05e-32	3.03e-31			AT4G13670	PTAC5	-1.17852	2.14e-76	3.27e-75
AT1G23040	AT1G23040	1.64184	2.02e-99	4.03e-98			AT4G13810	AtRLP47	-2.68884	4.21e-61	5.26e-60
AT3G53160	UGT73C7	1.64175	4.81e-17	2.36e-16			AT4G13830	ATJ20	-1.35815	4.92e-71	7e-70
AT4G00770	AT4G00770	1.64084	1.52e-07	4.71e-07			AT4G13990	AT4G13990	-1.15395	5.47e-08	1.75e-07
AT1G26250	AT1G26250	1.64076	2.02e-69	2.82e-68			AT4G14020	AT4G14020	-1.08785	2.59e-26	1.68e-25
AT5G22500	FAR1	1.6397	2.92e-108	6.42e-107			AT4G14040	SBP2	-1.32573	2.69e-201	1.24e-199
AT5G52020	ERF025	1.63928	1.17e-12	4.82e-12			AT4G14060	AT4G14060	-2.02777	4.14e-20	2.25e-19
AT3G44705	AT3G44705	1.63901	0.000291804	0.000669003			AT4G14140	MET4	-2.59656	2.08e-06	5.89e-06
AT3G23635	RTFL13	1.63829	0.000905802	0.00195135			AT4G14210	PDS	-1.1396	4.5e-107	9.72e-106
AT3G09870	AT3G09870	1.63812	0.00131369	0.002767			AT4G14280	AT4G14280	-1.41844	0.00565582	0.0108408
AT5G64910	AT5G64910	1.63783	6.02e-25	3.78e-24			AT4G14400	ACD6	-1.47978	5.16e-70	7.24e-69
AT3G62590	AT3G62590	1.63773	3.97e-21	2.23e-20			AT4G14480	BLUS1	-1.00688	5.26e-09	1.79e-08
AT1G18020	AT1G18020	1.63655	3.93e-102	8.1e-101			AT4G14504	MIR852A	-1.45437	0.0108774	0.0199272
AT4G20990	ACA4	1.6347	0.0210535	0.0366145			AT4G14540	NFYB3	-2.01187	7.38e-71	1.05e-69
AT2G46680	ATHB-7	1.63431	1.71e-86	2.95e-85			AT4G14690	ELIP2	-1.00957	4.7e-05	0.000117943
AT3G54000	AT3G54000	1.63369	5.41e-37	4.47e-36			AT4G14830	HSP1	-1.34939	4.11e-09	1.41e-08
AT5G17450	HIPP21	1.63198	4.76e-41	4.26e-40			AT4G14870	SECE1	-1.40575	5.31e-57	6.19e-56
AT1G20070	AT1G20070	1.63193	1.01e-37	8.43e-37			AT4G14890	FdC2	-1.82032	8.31e-131	2.25e-129
AT4G36280	AT4G36280	1.63176	1.95e-79	3.1e-78			AT4G14940	ATAO1	-1.24988	8.36e-11	3.15e-10
AT4G25380	SAP10	1.63132	0.0011122	0.00236452			AT4G15230	ABCG30	-1.23674	3.29e-15	1.51e-14
AT4G23310	CRK23	1.63132	0.0154758	0.0275507			AT4G15290	CSLB5	-1.26718	8.9e-06	2.38e-05
AT5G12380	ANNAT8	1.63037	2.7e-05	6.94e-05			AT4G15320	ATCSLB06	-1.40729	0.00133971	0.00281894
AT5G58730	AT5G58730	1.62989	1.6e-128	4.23e-127			AT4G15417	ATRTL1	-1.22425	0.0102497	0.0188483
AT1G01190	CYP78A8	1.62953	1.41e-29	9.91e-29			AT4G15440	CYP74B2	-2.36412	3.98e-39	3.43e-38
AT1G50590	AT1G50590	1.62893	8.06e-10	2.88e-09			AT4G15450	AT4G15450	-1.17254	8.12e-16	3.82e-15
AT1G63057	AT1G63057	1.6258	0.000612525	0.00134887			AT4G15480	UGT84A1	-2.05226	5.19e-11	1.98e-10
AT1G16370	2025-10-06	1.62484	2.02e-41	1.82e-40			AT4G15500	UGT84A4	-2.88486	4.18e-47	4.17e-46
AT1G57850	AT1G57850	1.62311	0.0196289	0.0343298			AT4G15510	PPD1	-1.41198	5.65e-66	7.54e-65
AT2G24165	AT2G24165	1.62216	0.0196887	0.0344198			AT4G15680	GRXS4	-1.86911	2.34e-14	1.04e-13
AT5G27630	ACBP5	1.62016	3.97e-41	3.56e-40			AT4G15690	GRXS5	-1.416	1.48e-10	5.51e-10
AT4G22070	WRKY31	1.62004	4.65e-30	3.31e-29			AT4G15740	AT4G15740	-1.88819	0.000761655	0.0016571
AT1G18830	SEC31A	1.61966	3.84e-05	9.73e-05			AT4G15810	AT4G15810	-1.05559	1.79e-16	8.62e-16
AT3G44326	AT3G44326	1.61954	4.56e-25	2.88e-24			AT4G15830	AT4G15830	-1.04694	1.08e-18	5.61e-18
AT2G14095	AT2G14095	1.61904	1.95e-11	7.59e-11			AT4G16000	AT4G16000	-1.1593	3.02e-05	7.72e-05
AT3G03310	LCAT3	1.61717	5.81e-123	1.46e-121			AT4G16146	AT4G16146	-1.43705	1.89e-32	1.42e-31
AT5G28610	AT5G28610	1.61701	0.000104517	0.000252743			AT4G16390	P67	-1.46529	2.07e-127	5.43e-126
AT3G05550	AT3G05550	1.61567	1.75e-07	5.4e-07			AT4G16410	AT4G16410	-1.17642	2.6e-50	2.73e-49
AT3G26790	FUS3	1.61566	0	0			AT4G16515	RGF6	-1.68617	1.28e-11	5.01e-11
AT3G32047	AT3G32047	1.61522	5.7e-05	0.000141756			AT4G16540	AT4G16540	-2.54516	4.37e-15	2e-14
AT2G31590	AT2G31590	1.61478	0.0234546	0.0404159			AT4G16860	RPP4	-1.13283	6.91e-120	1.69e-118
AT5G46060	AT5G46060	1.61384	2.34e-09	8.14e-09			AT4G16870	AT4G16870	-2.81499	1.39e-134	3.89e-133
AT2G01940	SGR5	1.6132	9.6e-40	8.37e-39			AT4G16880	AT4G16880	-3.70398	6.32e-213	3.21e-211
AT3G54320	WRI1	1.61203	4.66e-68	6.39e-67			AT4G17000	AT4G17000	-1.03549	3.54e-13	1.49e-12
AT1G23350	AT1G23350	1.61201	0.00268815	0.00542315			AT4G17090	BAM3	-2.36297	0	0
AT1G47565	AT1G47565	1.61182	5.34e-34	4.15e-33			AT4G17100	AT4G17100	-1.22449	2.87e-108	6.31e-107
AT1G71690	AT1G71690	1.61177	0.0005193	0.0011556			AT4G17340	TIP2-2	-2.83941	0	0
AT3G03280	AT3G03280	1.61146	4.65e-08	1.49e-07			AT4G17360	PURU2	-1.85377	3.36e-31	2.46e-30
AT1G36060	ERF055	1.61131	1.78e-123	4.51e-122			AT4G17460	HAT1	-1.99752	2.71e-153	8.96e-152
AT2G23150	NRAMP3	1.61092	2.96e-80	4.76e-79			AT4G17480	AT4G17480	-2.32683	1.07e-09	3.82e-09
AT3G55110	ABCG18	1.61038	5.04e-43	4.68e-42			AT4G17560	AT4G17560	-1.28656	1.94e-130	5.24e-129
AT2G40140	CZF1	1.61005	0	0			AT4G17600	LIL3:1	-1.78683	7.07e-275	5.31e-273
AT4G21500	AT4G21500	1.60963	4.6e-08	1.48e-07			AT4G17695	KAN3	-1.13404	1.2e-09	4.25e-09
AT2G41170	AT2G41170	1.60922	2.89e-41	2.59e-40			AT4G17760	AT4G17760	-1.66338	5.89e-09	2e-08
AT5G05350	AT5G05350	1.60854	2.96e-06	8.27e-06			AT4G17860	AT4G17860	-4.1977	2.22e-10	8.18e-10
AT5G52050	AT5G52050	1.60843	3.93e-28	2.66e-27			AT4G17970	ALMT12	-2.14206	4.79e-59	5.79e-58
AT3G57645	U2.2	1.60838	0.0142022	0.0254736			AT4G18240	SS4	-1.19979	8.21e-153	2.7e-151
AT5G25910	AtRLP52	1.60738	8.97e-12	3.55e-11			AT4G18290	KAT2	-1.39598	1.24e-20	6.86e-20
AT4G14450	AT4G14450	1.6072	0.000356565	0.000809684			AT4G18335	AT4G18335	-1.55878	0.0243683	0.0418388
AT3G51590	LTP12	1.60668	0.0228703	0.039494			AT4G18370	DEGP5	-1.35373	1.94e-63	2.49e-62
AT1G30935	AT1G30935	1.60609	2.44e-09	8.5e-09			AT4G18390	TCP2	-2.97222	4.29e-136	1.22e-134
AT5G40010	AATP1	1.60511	1.39e-10	5.19e-10			AT4G18440	AT4G18440	-1.60918	2.21e-212	1.12e-210
AT1G13550	AT1G13550	1.60509	0.0239608	0.0411936			AT4G18480	CHLI1	-1.26047	1.75e-230	1.01e-228
AT5G38096	AT5G38096	1.6042	0.0118944	0.0216494			AT4G18630	AT4G18630	-2.09831	1.07e-31	7.9e-31
AT3G07120	AT3G07120	1.6035	6.93e-08	2.2e-07			AT4G18670	LRX5	-1.15544	6.02e-12	2.4e-11
AT5G09360	LAC14	1.60261	0.0213023	0.0369901			AT4G18740	AT4G18740	-1.39032	2.32e-31	1.71e-30
AT3G18610	NUCL2	1.60198	9.33e-28	6.28e-27			AT4G18750	DOT4	-1.05505	4.81e-08	1.55e-07
AT5G10625	FLP2	1.60166	3.92e-51	4.18e-50			AT4G18960	AG	-3.24467	4.43e-07	1.32e-06
AT1G72000	INVF	1.60123	0.0087046	0.0161945			AT4G19030	NIP1-1	-1.04631	3.62e-31	2.66e-30
AT3G48510	AT3G48510	1.60116	2.65e-11	1.02e-10			AT4G19050	AT4G19050	-1.09706	0.000288344	0.000661499
AT3G02000	GRXC7	1.59965	9.86e-07	2.86e-06			AT4G19100	PAM68	-1.52653	4.83e-44	4.59e-43
AT3G52770	ZPR3	1.5972	6.29e-09	2.13e-08			AT4G19120	ERD3	-1.29597	8.9e-94	1.66e-92
AT2G41730	AT2G41730	1.59591	1.85e-34	1.45e-33			AT4G19170	CCD4	-4.71917	0	0
AT3G53690	AT3G53690	1.59578	2.13e-11	8.27e-11			AT4G19645	AT4G19645	-1.35025	3.3e-05	8.4e-05
AT1G42990	BZIP60	1.59562	2.06e-118	4.97e-117			AT4G19690	IRT1	-1.91361	1.24e-14	5.58e-14
AT1G60030	NAT7	1.59462	1.25e-24	7.79e-24			AT4G19820	AT4G19820	-1.90755	0.00641306	0.0121782
AT2G18060	NAC037	1.59436	1.29e-08	4.3e-08			AT4G19985	AT4G19985	-1.05283	5.08e-18	2.58e-17
AT4G36740	ATHB-40	1.59424	1.5e-05	3.94e-05			AT4G20130	PTAC14	-1.28423	8.69e-106	1.86e-104
AT2G40095	AT2G40095	1.59367	6.49e-44	6.16e-43			AT4G20160	AT4G20160	-1.3318	0.00023185	0.000538123
AT4G23960	AT4G23960	1.59361	0.0211555	0.036779			AT4G20240	CYP71A27	-1.09327	3.35e-23	2.01e-22
AT5G25770	AT5G25770	1.59207	1.4e-132	3.84e-131			AT4G20360	TUFA	-1.26617	3.73e-307	3.54e-305
AT1G26911	AT1G26911	1.59093	0.0213625	0.0370817			AT4G20450	AT4G20450	-1.01172	6.07e-05	0.000150258
AT5G54206	AT5G54206	1.59093	0.0216918	0.0376005			AT4G20820	AT4G20820	-2.00184	3.56e-60	4.39e-59
AT5G44360	AT5G44360	1.58994	0.0244604	0.0419824			AT4G20940	AT4G20940	-1.00286	4.87e-16	2.31e-15
AT1G61610	AT1G61610	1.5894	2.56e-25	1.63e-24			AT4G21190	EMB1417	-1.20538	2.18e-43	2.04e-42
AT1G21310	EXT3	1.58706	2e-29	1.4e-28			AT4G21210	RP1	-1.11013	6.08e-79	9.62e-78
AT4G27280	AT4G27280	1.58646	6.06e-126	1.56e-124			AT4G21215	AT4G21215	-1.10547	7.14e-22	4.1e-21
AT5G03670	AT5G03670	1.58615	3.64e-49	3.76e-48			AT4G21250	AT4G21250	-1.2962	0.0250305	0.0428926
AT1G29195	AT1G29195	1.58569	4.63e-16	2.19e-15			AT4G21280	PSBQ1	-1.76237	0	0
AT4G17615	CBL1	1.58553	5.17e-73	7.54e-72			AT4G21445	AT4G21445	-4.05743	1.87e-127	4.89e-126
AT1G73680	DOX2	1.58497	2.52e-250	1.66e-248			AT4G21760	BGLU47	-1.78237	1.64e-12	6.73e-12
AT5G36110	CYP716A1	1.5849	4.18e-05	0.000105441			AT4G21770	AT4G21770	-1.24909	1.39e-35	1.11e-34
AT2G05510	AT2G05510	1.58369	1.03e-135	2.92e-134			AT4G21870	HSP15.4	-1.77618	7.72e-45	7.46e-44
AT3G62320	AT3G62320	1.5833	0.0209583	0.0364746			AT4G22190	AT4G22190	-1.07251	8.15e-27	5.36e-26
AT2G34070	TBL37	1.58312	4.98e-131	1.35e-129			AT4G22200	AKT2	-3.78887	9.42e-109	2.08e-107
AT4G01430	AT4G01430	1.58061	4.57e-78	7.15e-77			AT4G22270	MRB1	-1.21344	7.66e-11	2.9e-10
AT1G61700	NRPB10L	1.58001	0.0221293	0.0383027			AT4G22485	AT4G22485	-1.5146	3e-11	1.16e-10
AT2G35658	AT2G35658	1.57918	1.75e-05	4.57e-05			AT4G22505	AT4G22505	-1.37121	3.39e-12	1.37e-11
AT4G14390	AT4G14390	1.57847	1.5e-13	6.42e-13			AT4G22520	AT4G22520	-1.87842	4.76e-42	4.35e-41
AT3G22560	AT3G22560	1.57623	8.7e-09	2.93e-08			AT4G22570	APT3	-1.66479	1.04e-67	1.42e-66
AT5G11140	AT5G11140	1.57614	0.000595798	0.00131414			AT4G22666	AT4G22666	-1.55925	2.83e-25	1.8e-24
AT5G20790	AT5G20790	1.57567	1.45e-116	3.4e-115			AT4G22830	AT4G22830	-1.0949	1.93e-19	1.03e-18
AT3G23150	ETR2	1.57446	1.06e-146	3.32e-145			AT4G22890	PGRL1A	-1.33226	9.98e-236	6e-234
AT1G57640	AT1G57640	1.57426	0.0214767	0.0372667			AT4G22960	AT4G22960	-1.51164	4.62e-06	1.27e-05
AT1G17620	AT1G17620	1.57333	5.49e-143	1.66e-141			AT4G22990	AT4G22990	-1.02487	1.06e-19	5.7e-19
AT4G02320	PME40	1.57303	0.000263063	0.000606703			AT4G23020	AT4G23020	-2.42832	4.72e-14	2.07e-13
AT4G36000	AT4G36000	1.57301	0.000368351	0.000834609			AT4G23240	CRK16	-1.26833	0.000196772	0.000460939
AT5G53420	AT5G53420	1.57178	2.06e-171	7.94e-170			AT4G23290	CRK21	-3.70258	1.99e-173	7.77e-172
AT3G49540	AT3G49540	1.5713	0.0227584	0.0393283			AT4G23493	AT4G23493	-1.18841	0.000140982	0.000335648
AT2G34350	AT2G34350	1.57104	2.53e-20	1.38e-19			AT4G23496	SP1L5	-1.64729	0.0196868	0.0344189
AT3G10600	CAT7	1.57095	0.0085951	0.016004			AT4G23870	AT4G23870	-2.32285	2.3e-25	1.46e-24
AT3G05630	PLDP2	1.57028	6.62e-115	1.54e-113			AT4G23890	ndhS	-1.07059	1.74e-83	2.89e-82
AT1G71691	AT1G71691	1.57026	0.0119251	0.0217005			AT4G23940	AT4G23940	-1.15171	1.14e-72	1.65e-71
AT1G74190	AtRLP15	1.57023	0.0272991	0.0464714			AT4G23990	CSLG3	-2.48832	9.25e-55	1.04e-53
AT1G69850	NPF4.6	1.57004	4.89e-264	3.42e-262			AT4G24010	CSLG1	-1.72232	8.09e-07	2.37e-06
AT3G27220	AT3G27220	1.56911	1.59e-153	5.28e-152			AT4G24015	RHA4A	-1.5644	9.04e-16	4.25e-15
AT1G73010	PS2	1.56535	0	0			AT4G24090	AT4G24090	-1.46124	3.33e-43	3.11e-42
AT3G50260	ERF011	1.5653	2.24e-48	2.28e-47			AT4G24120	YSL1	-1.84463	1.43e-131	3.89e-130
AT1G49930	AT1G49930	1.56508	0.0237753	0.0409001			AT4G24130	AT4G24130	-1.16272	4.14e-14	1.82e-13
AT1G01305	AT1G01305	1.5645	0.0238202	0.0409689			AT4G24175	AT4G24175	-1.50574	1.05e-27	7.08e-27
AT3G01190	PER27	1.56188	6.88e-136	1.95e-134			AT4G24240	WRKY7	-1.01077	3.08e-45	2.99e-44
AT3G19200	AT3G19200	1.56114	1.34e-13	5.75e-13			AT4G24510	CER2	-1.50808	4.88e-79	7.72e-78
AT2G15490	UGT73B4	1.56051	1.78e-77	2.76e-76			AT4G24540	AGL24	-2.02722	1.82e-34	1.43e-33
AT1G52560	HSP26.5	1.56036	3.23e-06	8.99e-06			AT4G24700	AT4G24700	-1.70733	1.88e-06	5.35e-06
AT3G13432	AT3G13432	1.55849	4.74e-05	0.000118798			AT4G24750	STR11	-1.25321	2.71e-85	4.59e-84
AT3G23850	AT3G23850	1.55778	0.0289837	0.0490761			AT4G24770	CP31A	-1.79568	0	0
AT2G22810	ACS4	1.55728	0.00976783	0.0180251			AT4G24780	AT4G24780	-1.42052	5.23e-166	1.93e-164
AT1G70680	PXG5	1.5557	0.00706609	0.0133212			AT4G24790	F22K18.10	-1.09391	3.45e-16	1.64e-15
AT3G05920	AT3G05920	1.55534	3.46e-35	2.75e-34			AT4G24930	AT4G24930	-1.50186	2.92e-92	5.36e-91
AT5G07010	SOT15	1.5543	9.36e-56	1.07e-54			AT4G25050	ACP4	-1.80684	4.61e-208	2.25e-206
AT5G48980	AT5G48980	1.55407	0.00619452	0.0117957			AT4G25080	CHLM	-1.11338	5.34e-137	1.53e-135
AT3G56220	AT3G56220	1.55269	1.09e-19	5.86e-19			AT4G25220	RHS15	-2.20807	3.91e-30	2.8e-29
AT3G48346	AT3G48346	1.55183	0.0229397	0.0396085			AT4G25270	PCMP-E53	-1.22748	1.17e-16	5.68e-16
AT3G06860	MFP2	1.55183	0	0			AT4G25400	BHLH118	-2.68049	1.75e-06	4.97e-06
AT3G25290	AT3G25290	1.55168	1.47e-154	4.91e-153			AT4G25410	BHLH126	-1.57073	0.00300241	0.00600891
AT2G02930	GSTF3	1.55151	2.12e-08	6.95e-08			AT4G25420	GA20OX1	-1.65984	0.00123175	0.00260504
AT4G35070	AT4G35070	1.55139	6.14e-34	4.77e-33			AT4G25450	ABCB28	-1.31619	3.36e-59	4.07e-58
AT1G73210	AT1G73210	1.55026	1.49e-24	9.23e-24			AT4G25830	AT4G25830	-1.33392	5.21e-17	2.55e-16
AT3G17770	AT3G17770	1.54868	4.71e-106	1.01e-104			AT4G25910	NIFU3	-1.11965	9.21e-31	6.69e-30
AT5G59220	HAI1	1.54832	1.01e-08	3.4e-08			AT4G25940	AT4G25940	-1.0109	1.11e-27	7.46e-27
AT3G48630	AT3G48630	1.54722	0.0287769	0.0487527			AT4G25990	CIL	-2.88007	3.91e-51	4.17e-50
AT1G72800	AT1G72800	1.54625	7.6e-40	6.64e-39			AT4G26010	PER44	-1.28271	4.67e-97	9.01e-96
AT4G26890	MAPKKK16	1.54599	4.73e-15	2.16e-14			AT4G26255	AT4G26255	-1.36718	5.68e-07	1.68e-06
AT3G54030	AT3G54030	1.54588	1.57e-101	3.2e-100			AT4G26260	MIOX4	-2.0372	0.000213654	0.000497897
AT1G34050	AT1G34050	1.54508	0.00325009	0.00646988			AT4G26288	AT4G26288	-2.3929	3.65e-12	1.47e-11
AT1G17750	PEPR2	1.5447	8.54e-39	7.29e-38			AT4G26330	UNE17	-1.49193	0.02947	0.0498246
AT3G23120	AtRLP38	1.54438	3.08e-08	1e-07			AT4G26370	AT4G26370	-1.9323	4.68e-204	2.22e-202
AT2G32030	AT2G32030	1.54412	1.2e-21	6.84e-21			AT4G26520	AT4G26520	-1.84429	1.64e-69	2.29e-68
AT2G34185	AT2G34185	1.54395	5.46e-07	1.62e-06			AT4G26530	AT4G26530	-5.11769	0	0
AT2G15340	AT2G15340	1.54264	0.0228147	0.0394145			AT4G26660	AT4G26660	-1.11183	5.61e-27	3.71e-26
AT5G15850	COL1	1.54074	1.43e-49	1.48e-48			AT4G26790	AT4G26790	-1.16689	1.17e-06	3.39e-06
AT1G79400	CHX2	1.53922	0.00402114	0.00790318			AT4G26830	AT4G26830	-1.74684	7.86e-07	2.3e-06
AT3G46666	AT3G46666	1.53844	0.0279796	0.0475156			AT4G26860	AT4G26860	-1.04521	4.32e-36	3.51e-35
AT2G47550	PME20	1.53735	2.98e-43	2.79e-42			AT4G27030	FAD4	-2.07887	3.42e-40	3.01e-39
AT3G52400	SYP122	1.53594	1.01e-185	4.31e-184			AT4G27520	ENODL2	-1.21839	5.86e-93	1.08e-91
AT1G16500	AT1G16500	1.53476	1.44e-22	8.5e-22			AT4G27560	UGT79B2	-1.09751	2.76e-55	3.13e-54
AT1G31580	ECS1	1.53471	1.43e-115	3.35e-114			AT4G27570	UGT79B3	-1.73168	0.00365017	0.00721874
AT4G24000	CSLG2	1.53457	7.86e-26	5.06e-25			AT4G27600	NARA5	-1.37433	7.48e-156	2.55e-154
AT1G54470	RPP27	1.53398	0.00974133	0.0179802			AT4G27700	AT4G27700	-1.52444	2.22e-150	7.14e-149
AT1G79360	2025-10-02	1.53369	6.57e-12	2.61e-11			AT4G27710	CYP709B3	-1.22387	1.23e-47	1.24e-46
AT4G12480	EARLI1	1.53292	8.33e-251	5.5e-249			AT4G27800	PPH1	-1.03654	5.54e-122	1.39e-120
AT3G23550	LAL5	1.53274	1.98e-230	1.14e-228			AT4G27820	BGLU9	-1.60757	3.96e-59	4.79e-58
AT1G71695	PER12	1.53195	5.79e-182	2.41e-180			AT4G28040	AT4G28040	-1.04037	2.49e-11	9.63e-11
AT3G52450	PUB22	1.53163	9.51e-46	9.3e-45			AT4G28080	AT4G28080	-1.69089	2.4e-157	8.24e-156
AT4G30060	AT4G30060	1.53157	5.93e-117	1.4e-115			AT4G28150	AT4G28150	-1.14505	4.31e-06	1.19e-05
AT2G42790	CSY3	1.53063	1.16e-282	9.4e-281			AT4G28180	AT4G28180	-1.23602	2.25e-12	9.15e-12
AT4G21323	AT4G21323	1.53061	4.69e-06	1.29e-05			AT4G28210	emb1923	-1.0507	6.1e-39	5.23e-38
AT5G28960	AT5G28960	1.5294	0.000211634	0.000493654			AT4G28240	AT4G28240	-1.21908	6.43e-37	5.3e-36
AT5G37770	CML24	1.52885	1.8e-77	2.8e-76			AT4G28250	EXPB3	-1.47207	4.93e-62	6.22e-61
AT5G55780	AT5G55780	1.52715	0.000348181	0.00079166			AT4G28680	TYRDC	-1.46527	7.85e-09	2.65e-08
AT1G34630	AT1G34630	1.52687	7.45e-128	1.96e-126			AT4G28706	AT4G28706	-1.04576	1.09e-37	9.12e-37
AT1G69480	PHO1-H10	1.52678	3.05e-12	1.23e-11			AT4G28750	PSAE1	-1.42053	1.64e-229	9.42e-228
AT4G33560	AT4G33560	1.52652	5.87e-101	1.2e-99			AT4G28780	AT4G28780	-2.39858	4.24e-98	8.27e-97
AT4G05110	ENT6	1.52651	4.47e-13	1.88e-12			AT4G28850	XTH26	-1.56563	8.2e-27	5.4e-26
AT2G26355	AT2G26355	1.52466	3.73e-80	5.99e-79			AT4G28890	ATL42	-1.0321	6.48e-07	1.91e-06
AT5G41300	CRRSP59	1.5237	0.000342747	0.000779806			AT4G28900	AT4G28900	-1.26196	1.06e-07	3.3e-07
AT1G62500	AT1G62500	1.52341	3.82e-94	7.17e-93			AT4G28940	AT4G28940	-1.55881	2.94e-17	1.46e-16
AT1G62440	LRX2	1.5211	3.67e-55	4.16e-54			AT4G29020	AT4G29020	-1.4875	2.42e-92	4.45e-91
AT4G00950	MEE47	1.52076	1.51e-80	2.44e-79			AT4G29030	AT4G29030	-2.66686	1.57e-76	2.39e-75
AT1G66290	AT1G66290	1.52062	0.0274536	0.0467184			AT4G29050	LECRK59	-1.56822	1.24e-09	4.39e-09
AT4G13480	AtMYB79	1.51923	0.022028	0.0381379			AT4G29060	emb2726	-1.7238	0	0
AT3G56880	AT3G56880	1.51895	2.07e-122	5.21e-121			AT4G29080	IAA27	-1.07215	6.04e-25	3.79e-24
AT3G55090	ABCG16	1.51874	1.25e-11	4.93e-11			AT4G29110	AT4G29110	-1.67747	3.41e-13	1.44e-12
AT1G49475	AT1G49475	1.51805	9.59e-07	2.79e-06			AT4G29150	IQD25	-1.67825	8.34e-08	2.63e-07
AT4G20000	AT4G20000	1.51537	7.88e-08	2.49e-07			AT4G29180	RHS16	-1.16059	1.73e-14	7.7e-14
AT1G33760	ERF022	1.5146	8.7e-11	3.28e-10			AT4G29400	AT4G29400	-2.22341	1.68e-81	2.75e-80
AT3G50030	AT3G50030	1.51454	0.000982904	0.002107			AT4G29450	AT4G29450	-1.92499	0.00427642	0.00837567
AT1G77120	ADH1	1.51402	5.3e-275	4e-273			AT4G29590	AT4G29590	-1.03283	3.81e-43	3.55e-42
AT2G18600	RCE2	1.51376	6.11e-19	3.2e-18			AT4G29610	CDA6	-2.17446	1.86e-23	1.12e-22
AT1G61750	CRRSP1	1.51365	0.00685071	0.0129497			AT4G29720	PAO5	-1.03123	6.03e-33	4.58e-32
AT1G50740	FAX5	1.51353	1.26e-52	1.38e-51			AT4G29750	AT4G29750	-1.13703	1.61e-54	1.8e-53
AT5G24655	LSU4	1.51346	1.14e-12	4.72e-12			AT4G29800	PLP8	-1.14601	4.11e-09	1.41e-08
AT1G16670	AT1G16670	1.51337	3.49e-70	4.92e-69			AT4G29905	AT4G29905	-4.89334	0	0
AT1G15110	PSS1	1.51327	1.73e-91	3.16e-90			AT4G30410	AT4G30410	-1.28253	5.53e-10	1.99e-09
AT4G22230	AT4G22230	1.51258	3.33e-15	1.53e-14			AT4G30620	AT4G30620	-1.09081	7.83e-36	6.33e-35
AT3G23090	AT3G23090	1.51257	5.07e-111	1.14e-109			AT4G30650	AT4G30650	-2.1718	5.56e-109	1.23e-107
AT2G05910	AT2G05910	1.51197	4.66e-12	1.87e-11			AT4G30670	AT4G30670	-1.77415	6.75e-69	9.32e-68
AT4G04020	PAP1	1.51041	3.38e-277	2.61e-275			AT4G30720	AT4G30720	-1.46933	1.9e-100	3.83e-99
AT1G24320	GCS2	1.51002	2.47e-28	1.68e-27			AT4G30825	AT4G30825	-1.57228	1.78e-86	3.05e-85
AT5G20410	MGD2	1.50979	8.15e-134	2.27e-132			AT4G30830	AT4G30830	-1.05078	0.0125684	0.0227775
AT4G23590	AT4G23590	1.50977	9.22e-21	5.13e-20			AT4G30845	AT4G30845	-1.61232	1.17e-10	4.4e-10
AT3G10040	AT3G10040	1.50915	2.4e-194	1.08e-192			AT4G30910	AT4G30910	-1.1246	6.34e-35	5.02e-34
AT5G12910	AT5G12910	1.50838	0.00427631	0.00837567			AT4G30950	FAD6	-1.27638	2.91e-215	1.5e-213
AT3G12145	FLR1	1.50806	1.03e-96	1.98e-95			AT4G31140	AT4G31140	-1.00252	5.57e-16	2.63e-15
AT5G35945	AT5G35945	1.50722	0.0283769	0.0481276			AT4G31450	AT4G31450	-1.09463	1.93e-25	1.23e-24
AT2G27670	AT2G27670	1.50658	0.0280589	0.0476372			AT4G31470	AT4G31470	-1.06751	0.000712543	0.00155571
AT2G40470	LBD15	1.50657	7.93e-13	3.29e-12			AT4G31530	AT4G31530	-1.06326	8.7e-47	8.65e-46
AT1G19610	PDF1.4	1.50479	8.77e-10	3.13e-09			AT4G31560	HCF153	-1.11562	5.72e-40	5.01e-39
AT1G58360	AAP1	1.50445	3.29e-185	1.4e-183			AT4G31805	POLAR	-1.84149	2.36e-13	1.01e-12
AT4G36990	HSFB1	1.50389	7.94e-108	1.73e-106			AT4G31850	PGR3	-2.23185	2.79e-169	1.06e-167
AT5G27760	AT5G27760	1.50311	1.13e-111	2.56e-110			AT4G32000	AT4G32000	-1.94032	4.72e-18	2.4e-17
AT5G60460	AT5G60460	1.50294	2.29e-59	2.79e-58			AT4G32260	AT4G32260	-1.36583	1.12e-161	3.99e-160
AT5G48570	FKBP65	1.50279	1.39e-186	5.98e-185			AT4G32340	AT4G32340	-3.65906	0	0
AT4G21400	CRK28	1.50232	2.53e-74	3.76e-73			AT4G32570	TIFY8	-1.01871	1.11e-37	9.33e-37
AT3G41979	AT3G41979	1.5022	4.11e-66	5.5e-65			AT4G32710	PERK14	-1.05341	1.18e-13	5.07e-13
AT4G13230	AT4G13230	1.50072	0.0122429	0.0222428			AT4G32860	AT4G32860	-2.25556	9.09e-12	3.6e-11
AT5G41460	AT5G41460	1.49948	5.21e-59	6.29e-58			AT4G32950	AT4G32950	-1.20581	0.0215205	0.0373376
AT5G67060	HEC1	1.49943	3.31e-18	1.69e-17			AT4G32990	AT4G32990	-2.02931	0.00329567	0.00655324
AT4G15380	CYP705A4	1.49841	3.88e-16	1.84e-15			AT4G33010	GLDP1	-1.34717	3.61e-198	1.65e-196
AT4G34860	INVB	1.49788	2.91e-90	5.21e-89			AT4G33170	PCMP-H53	-1.12308	2.82e-05	7.22e-05
AT5G53950	NAC098	1.49767	0.000123112	0.000295402			AT4G33180	AT4G33180	-1.02291	4.64e-17	2.28e-16
AT5G57320	VLN5	1.49693	6.39e-17	3.12e-16			AT4G33270	CDC20-1	-1.04673	1.87e-35	1.5e-34
AT4G39480	CYP96A9	1.49624	3.47e-10	1.27e-09			AT4G33470	HDA14	-1.08663	4.18e-39	3.59e-38
AT4G37870	PCKA	1.49546	1.27e-272	9.36e-271			AT4G33490	AT4G33490	-1.55305	6.86e-62	8.63e-61
AT1G72140	NPF5.12	1.49525	1.27e-33	9.77e-33			AT4G33660	AT4G33660	-1.39339	6.89e-23	4.09e-22
AT4G13560	UNE15	1.495	6.92e-07	2.04e-06			AT4G33666	AT4G33666	-1.86783	6.44e-16	3.03e-15
AT3G04640	AT3G04640	1.49497	1.13e-56	1.31e-55			AT4G33760	AT4G33760	-1.18888	2.87e-89	5.09e-88
AT1G04150	AT1G04150	1.49286	0.0213584	0.0370771			AT4G33790	FAR3	-1.52879	1.3e-05	3.43e-05
AT2G01020	AT2G01020	1.49261	4.55e-63	5.83e-62			AT4G33880	BHLH85	-1.22842	2.1e-09	7.34e-09
AT5G16990	P2	1.49211	1.76e-96	3.38e-95			AT4G33960	AT4G33960	-1.06033	2.99e-14	1.32e-13
AT5G46640	AHL8	1.49067	3.95e-30	2.82e-29			AT4G33980	AT4G33980	-1.79188	1.86e-102	3.85e-101
AT1G05420	OFP12	1.49054	4.71e-06	1.29e-05			AT4G34060	DML3	-1.31142	1.6e-07	4.96e-07
AT2G17043	AT2G17043	1.49022	0.0295103	0.0498895			AT4G34138	UGT73B1	-1.64755	8.98e-182	3.73e-180
AT5G06870	PGIP2	1.48986	2.58e-281	2.04e-279			AT4G34190	2025-09-01	-1.33594	1.21e-83	2.02e-82
AT1G74360	AT1G74360	1.48887	4.24e-35	3.37e-34			AT4G34220	AT4G34220	-2.01423	3.4e-117	8.05e-116
AT1G73590	PIN1	1.48877	1.56e-81	2.54e-80			AT4G34240	ALDH3I1	-1.179	2.01e-59	2.45e-58
AT5G06320	NHL3	1.48832	5.97e-291	5.15e-289			AT4G34290	AT4G34290	-1.40743	6.7e-98	1.3e-96
AT5G49920	AT5G49920	1.48823	0.005766	0.0110366			AT4G34400	AT4G34400	-1.95802	2.68e-05	6.88e-05
AT1G19530	AT1G19530	1.48807	6.95e-72	9.99e-71			AT4G34510	KCS2	-1.45736	0.000221294	0.000514829
AT4G13395	DVL10	1.48785	2.82e-39	2.43e-38			AT4G34620	SSR16	-1.08884	1.26e-49	1.31e-48
AT2G39330	JAL23	1.48705	2.8e-268	2e-266			AT4G34650	SQS2	-1.83985	8.32e-10	2.97e-09
AT1G22400	UGT85A1	1.48627	8.17e-149	2.59e-147			AT4G34730	AT4G34730	-1.83054	5.33e-104	1.11e-102
AT1G05675	UGT74E1	1.48399	3.5e-13	1.48e-12			AT4G34830	MRL1	-1.83614	1.04e-236	6.27e-235
AT1G62900	AT1G62900	1.4832	0.0197746	0.0345528			AT4G34900	XDH2	-1.51468	6.37e-60	7.84e-59
AT5G07460	MRSA2	1.48291	6.55e-194	2.95e-192			AT4G34930	AT4G34930	-1.30827	3.51e-06	9.74e-06
AT3G51440	SSL6	1.48224	2.58e-35	2.06e-34			AT4G34980	SBT1.6	-1.24514	1.32e-53	1.46e-52
AT1G25230	PAP4	1.48216	3.24e-139	9.49e-138			AT4G35010	BGAL11	-3.04699	9.38e-06	2.51e-05
AT3G18280	AT3G18280	1.48159	1.93e-105	4.1e-104			AT4G35160	AT4G35160	-3.48038	1.14e-39	9.93e-39
AT3G58200	AT3G58200	1.4813	1.58e-20	8.7e-20			AT4G35250	AT4G35250	-1.24854	1.73e-124	4.4e-123
AT5G59550	AT5G59550	1.48084	8.13e-157	2.78e-155			AT4G35560	AT4G35560	-1.06024	2.1e-22	1.23e-21
AT4G39580	AT4G39580	1.48057	8.61e-10	3.08e-09			AT4G35680	AT4G35680	-1.05443	0.00347844	0.0068984
AT5G02420	SMR3	1.4794	2.81e-20	1.53e-19			AT4G35810	AT4G35810	-1.18781	0.00213033	0.00435669
AT4G34230	CAD5	1.47763	5.32e-183	2.23e-181			AT4G35900	FD	-2.18948	5.61e-17	2.75e-16
AT5G64250	AT5G64250	1.47735	5.07e-148	1.59e-146			AT4G36040	ATJ11	-1.38406	1.9e-129	5.1e-128
AT3G25180	CYP82G1	1.47679	1.23e-06	3.53e-06			AT4G36060	BHLH11	-1.3616	0.000135435	0.00032303
AT3G55430	AT3G55430	1.47646	4.48e-128	1.18e-126			AT4G36220	CYP84A1	-1.67037	2e-108	4.4e-107
AT4G34380	AT4G34380	1.47631	2.71e-08	8.85e-08			AT4G36240	GATA7	-1.54224	6.82e-15	3.09e-14
AT5G10520	RBK1	1.4748	3.25e-37	2.7e-36			AT4G36350	PAP25	-2.26849	2.54e-08	8.3e-08
AT2G28400	AT2G28400	1.47436	2.57e-23	1.55e-22			AT4G36390	AT4G36390	-1.21997	1.01e-113	2.34e-112
AT5G46080	AT5G46080	1.47421	2.29e-27	1.53e-26			AT4G36530	AT4G36530	-1.13385	5.43e-52	5.88e-51
AT1G79450	ALIS5	1.47411	3.13e-33	2.4e-32			AT4G36540	BEE2	-2.58622	2.05e-73	3.01e-72
AT2G25140	CLPB4	1.47362	3.56e-127	9.29e-126			AT4G36570	ATRL3	-1.62837	5.51e-19	2.89e-18
AT3G15510	ATNAC2	1.47312	7.36e-64	9.53e-63			AT4G36670	PLT6	-1.82283	7.84e-146	2.43e-144
AT4G23720	AT4G23720	1.47115	4.62e-08	1.49e-07			AT4G36870	BLH2	-1.84495	7.52e-70	1.05e-68
AT1G07985	AT1G07985	1.46995	8.35e-09	2.81e-08			AT4G36970	AT4G36970	-1.1209	2.85e-50	2.99e-49
AT1G59860	HSP17.6A	1.46877	6.34e-21	3.54e-20			AT4G37040	MAP1D	-1.15831	1.02e-68	1.4e-67
AT3G11410	PP2CA	1.46817	1.16e-148	3.67e-147			AT4G37110	AT4G37110	-1.12236	1.1e-25	7.09e-25
AT3G02630	S-ACP-DES5	1.46812	6.29e-275	4.73e-273			AT4G37330	CYP81D4	-1.33343	4.68e-58	5.55e-57
AT2G43840	UGT74F1	1.46605	5.53e-22	3.19e-21			AT4G37420	AT4G37420	-2.09648	0.00321849	0.00641419
AT2G41810	AT2G41810	1.46496	0.000483176	0.00107977			AT4G37470	KAI2	-1.13206	1.93e-59	2.35e-58
AT1G49700	AT1G49700	1.4628	4.7e-06	1.29e-05			AT4G37490	CYCB1-1	-1.19142	8.46e-16	3.97e-15
AT3G15536	AT3G15536	1.46232	0.0183479	0.0322579			AT4G37510	AT4G37510	-1.35376	1.44e-168	5.43e-167
AT5G13700	PAO1	1.46147	6.72e-07	1.98e-06			AT4G37540	LBD39	-1.4878	3.35e-57	3.93e-56
AT3G23870	AT3G23870	1.45937	1.05e-20	5.84e-20			AT4G37610	BT5	-2.06108	2.88e-222	1.57e-220
AT1G63530	AT1G63530	1.45795	1.51e-28	1.03e-27			AT4G37620	AT4G37620	-1.14878	0.0215586	0.0373958
AT1G07380	AT1G07380	1.4577	1.09e-119	2.66e-118			AT4G37810	EPFL2	-1.09613	0.00272478	0.00549391
AT1G16130	WAKL2	1.45518	6.63e-22	3.81e-21			AT4G37890	EDA40	-1.10512	9.91e-08	3.11e-07
AT5G60300	LECRK19	1.45463	2.94e-148	9.29e-147			AT4G37920	AT4G37920	-1.63465	9.67e-100	1.94e-98
AT2G45315	AT2G45315	1.45419	0.00300252	0.00600891			AT4G37925	NDHM	-2.58536	2.76e-227	1.55e-225
AT1G03940	3AT1	1.45363	2.47e-44	2.37e-43			AT4G37930	SHM1	-1.42689	0	0
AT5G54165	AT5G54165	1.4528	2.34e-09	8.16e-09			AT4G37980	CAD7	-1.43948	2.08e-81	3.4e-80
AT3G52525	OFP6	1.45272	6.71e-10	2.41e-09			AT4G38160	pde191	-1.6011	4.48e-146	1.39e-144
AT1G21050	AT1G21050	1.45264	5.29e-83	8.76e-82			AT4G38340	NLP3	-1.79044	1e-06	2.92e-06
AT2G16586	AT2G16586	1.4524	5.59e-06	1.52e-05			AT4G38780	AT4G38780	-1.05936	1.73e-05	4.53e-05
AT1G79900	BAC2	1.45138	8.15e-05	0.000199529			AT4G38810	AT4G38810	-1.0316	1.76e-44	1.69e-43
[truncated: 805 more rows]

## Sheet: TF in FUS3-GR-FLAG_up_TF 
family	name	ID	log2(FUS3-GR-FLAG_DEX/DMSO)	FDR
ERF	ERF017	AT1G19210	6.18392	9.01e-47
ERF	ABI4	AT2G40220	5.89969	1.12e-22
ERF	DREB1D	AT5G51990	4.06908	3.9e-09
ERF	ERF114	AT5G61890	3.47576	3.6e-55
ERF	DREB1F	AT1G12610	3.47349	3.34e-26
ERF	DREB2E	AT2G38340	3.18644	5.66e-27
ERF	ERF021	AT1G71450	3.02068	5.47e-06
ERF	ERF019	AT1G22810	2.9733	6.25e-07
ERF	ERF115	AT5G07310	2.92919	6e-14
ERF	ERF084	AT1G80580	2.86728	0.000119222
ERF	ERF071	AT2G47520	2.80769	7.53e-216
ERF	ERF113	AT5G13330	2.75103	1.22e-173
ERF	ERF13	AT2G44840	2.74733	1.5e-157
ERF	DREB2G	AT5G18450	2.63656	0.000495776
ERF	ERF013	AT1G77640	2.58291	1.04e-78
ERF	ERF11	AT1G28370	2.54985	2.8e-167
ERF	ABR1	AT5G64750	2.43281	1.31e-12
ERF	DREB1E	AT1G63030	2.40597	0.00162738
ERF	ERF1B	AT3G23240	2.29115	3.71e-42
ERF	DREB1B	AT4G25490	2.29003	2.1e-08
ERF	ERF016	AT5G21960	2.14097	2.71e-19
ERF	ERF109	AT4G34410	2.13375	1.95e-92
ERF	ERF105	AT5G51190	2.11401	1.7e-271
ERF	ERF014	AT1G44830	2.11061	8.77e-31
ERF	DREB1C	AT4G25470	2.08224	1.5e-20
ERF	ERF088	AT1G12890	1.99635	0.00144455
ERF	ERF020	AT1G71520	1.86626	9.25e-05
ERF	ERF003	AT5G25190	1.76892	1.97e-75
ERF	ERF5	AT5G47230	1.72427	3.44e-120
ERF	ERF4	AT3G15210	1.68784	6.82e-290
ERF	ERF025	AT5G52020	1.63928	4.82e-12
AP2	WRI1	AT3G54320	1.61203	6.39e-67
ERF	WIND3	AT1G36060	1.61131	4.51e-122
ERF	ERF011	AT3G50260	1.5653	2.28e-47
ERF	ERF022	AT1G33760	1.5146	3.28e-10
ERF	CRF3	AT5G53290	1.2585	9.83e-23
ERF	ERF043	AT4G32800	1.15612	5.77e-21
ERF	ERF12	AT1G28360	1.07051	0.000298305
WRKY	WRKY46	AT2G46400	4.54835	0
WRKY	WRKY75	AT5G13080	4.07091	1.57e-218
WRKY	WRKY38	AT5G22570	3.86127	1.04e-78
WRKY	WRKY51	AT5G64810	3.42464	9.18e-72
WRKY	WRKY59	AT2G21900	3.36337	2.59e-12
WRKY	WRKY63	AT1G66600	3.34192	2.38e-23
WRKY	WRKY62	AT5G01900	3.20649	3.46e-09
WRKY	WRKY34	AT4G26440	2.91243	1.16e-05
WRKY	WRKY8	AT5G46350	2.7362	1.94e-38
WRKY	WRKY40	AT1G80840	2.71186	0
WRKY	WRKY66	AT1G80590	2.47632	0.00115119
WRKY	WRKY48	AT5G49520	2.39086	3.98e-143
WRKY	WRKY72	AT5G15130	2.00355	1.59e-64
WRKY	WRKY30	AT5G24110	1.85193	1.83e-06
WRKY	WRKY31	AT4G22070	1.62004	3.31e-29
WRKY	WRKY53	AT4G23810	1.39387	2.92e-36
WRKY	WRKY45	AT3G01970	1.37464	1.66e-49
WRKY	WRKY23	AT2G47260	1.36646	3.19e-24
WRKY	WRKY25	AT2G30250	1.35484	1.76e-94
WRKY	WRKY60	AT2G25000	1.20743	7.13e-18
WRKY	WRKY58	AT3G01080	1.16505	0.0188561
WRKY	WRKY18	AT4G31800	1.14987	6.6e-124
WRKY	WRKY28	AT4G18170	1.14027	8.09e-09
NAC	NAC054	AT3G15170	4.27925	1.55e-24
NAC	NAC025	AT1G61110	3.35367	1.17e-07
NAC	ANAC104	AT5G64530	3.29464	8.39e-70
NAC	NAC066	AT3G61910	3.26966	1.39e-10
NAC	NAC019	AT1G52890	2.91333	6.22e-217
NAC	NAC043	AT2G46770	2.90452	9.44e-11
NAC	NAC004	AT1G02230	2.89696	6.7e-19
NAC	JUB1	AT2G43000	2.72478	1.28e-43
NAC	anac074	AT4G28530	2.50111	9.25e-24
NAC	ANAC087	AT5G18270	2.47033	2.95e-240
NAC	NAC061	AT3G44350	2.28322	4.84e-05
NAC	anac071	AT4G17980	2.13863	1.96e-07
NAC	NAC68	AT4G01540	2.07279	8.07e-95
NAC	anac099	AT5G56620	1.93765	8.66e-09
NAC	NAC003	AT1G02220	1.92928	7.83e-134
NAC	NAC60	AT3G44290	1.9098	4.22e-06
NAC	NAC13	AT1G32870	1.78762	1.09e-141
NAC	AT3G12910	AT3G12910	1.65359	0.0334023
NAC	NAC037	AT2G18060	1.59436	4.3e-08
NAC	NAC098	AT5G53950	1.49767	0.000295402
NAC	ATNAC2	AT3G15510	1.47312	9.53e-63
NAC	NAC062	AT3G49530	1.4303	1.88e-134
NAC	NAC002	AT1G01720	1.38258	2.54e-116
NAC	NAC029	AT1G69490	1.372	2.85e-28
NAC	NAC016	AT1G34180	1.35004	6.48e-15
NAC	ANAC091	AT5G24590	1.3468	3.2e-141
NAC	NAC021	AT1G56010	1.34249	4.66e-78
NAC	NAC081	AT5G08790	1.02272	2.58e-142
AP2	AIL1	AT1G72570	9.25631	3.94e-78
AP2	AIL7	AT5G65510	2.77963	1.98e-94
AP2	AIL5	AT5G57390	2.60673	3.84e-83
AP2	BBM	AT5G17430	2.10309	5.28e-20
AP2	WRI1	AT3G54320	1.61203	6.39e-67
AP2	AIL6	AT5G10510	1.23519	6.06e-37
MIKC_MADS	FLC	AT5G10140	5.66303	3.31e-176
MIKC_MADS	AGL67	AT1G77950	4.07032	2.11e-16
MIKC_MADS	AGL15	AT5G13790	3.02891	1.07e-205
MIKC_MADS	AGL1	AT3G58780	2.95293	4.63e-50
MIKC_MADS	AGL19	AT4G22950	1.28978	0.00779349
MIKC_MADS	AGL17	AT2G22630	1.22885	0.00183866
MIKC_MADS	SEP1	AT5G15800	1.18159	0.00700358
MIKC_MADS	PI	AT5G20240	1.176	2.79e-05
MIKC_MADS	ANR1	AT2G14210	1.13686	0.000322169
MIKC_MADS	AGL21	AT4G37940	1.02298	2.03e-05
WOX	WOX12	AT5G17810	5.47913	1.69e-286
WOX	WOX5	AT3G11260	3.63925	2.07e-19
WOX	WOX3	AT2G28610	3.52123	2.79e-18
WOX	AT5G46010	AT5G46010	2.34309	0.00219124
MYB	MYB21	AT3G27810	5.27649	5.69e-24
MYB	MYB15	AT3G23250	5.04632	0
MYB	MYB24	AT5G40350	3.69187	2.89e-08
MYB	MYB78	AT5G49620	3.45454	5.85e-33
MYB	MYB112	AT1G48000	3.20719	7.01e-55
MYB	MYB101	AT2G32460	3.11786	1.33e-05
MYB	MYB114	AT1G66380	3.04922	6.3e-10
MYB	MYB113	AT1G66370	2.94038	2.16e-20
MYB	MYB90	AT1G66390	2.78879	4.83e-53
MYB	AtMYB53	AT5G65230	2.68467	1.49e-29
MYB	ATMYB14	AT2G31180	2.23054	3.75e-29
MYB	ATMYB11	AT3G62610	2.16485	6.45e-06
MYB	MYB305	AT3G24310	2.15312	4.02e-09
MYB	MYB62	AT1G68320	1.98616	1.5e-10
MYB	ATMYB2	AT2G47190	1.86166	1.29e-15
MYB	MYB97	AT4G26930	1.80007	0.00893444
MYB	MYB111	AT5G49330	1.6739	1e-19
MYB	AtMYB79	AT4G13480	1.51923	0.0381379
MYB	MYB49	AT5G54230	1.38111	4.89e-17
MYB	MYB94	AT3G47600	1.2141	5.94e-23
MYB	MYB36	AT5G57620	1.15648	3.42e-14
MYB	MYB42	AT4G12350	1.09692	0.0108856
MYB	MYB51	AT1G18570	1.07453	4.46e-45
MYB	RAX2	AT2G36890	1.05098	3.34e-18
B3	REM2	AT4G31615	4.291	1.03e-19
B3	ABI3	AT3G24650	4.03696	6.66e-10
B3	REM7	AT4G31660	4.00964	8.95e-09
B3	AT5G25470	AT5G25470	2.97267	2.49e-42
B3	VAL1	AT2G30470	2.18795	0
B3	REM17	AT1G26680	1.67825	1.43e-13
B3	FUS3	AT3G26790	1.61566	0
B3	AT1G49475	AT1G49475	1.51805	2.79e-06
B3	REM16	AT4G33280	1.23907	5.71e-12
B3	AT1G16640	AT1G16640	1.16444	5.6e-07
B3	ARF32	AT3G11580	1.00887	1.89e-12
HD-ZIP	HDG3	AT2G32370	3.64245	3.69e-07
HD-ZIP	HDG10	AT1G34650	2.86652	4.61e-05
HD-ZIP	ATHB-53	AT5G66700	2.39801	1.88e-14
HD-ZIP	ATHB-4	AT2G44910	1.75275	1.32e-08
HD-ZIP	ATHB-7	AT2G46680	1.63431	2.95e-85
HD-ZIP	ATHB-40	AT4G36740	1.59424	3.94e-05
HD-ZIP	HAT4	AT4G16780	1.3758	2.55e-30
HD-ZIP	ATHB-17	AT2G01430	1.01792	4.19e-06
Trihelix	GT-3A	AT5G01380	3.86516	6.87e-83
Trihelix	GT-3B	AT2G38250	3.23604	6.97e-145
Trihelix	AT3G10040	AT3G10040	1.50915	1.08e-192
Trihelix	AT5G28300	AT5G28300	1.40122	7.85e-98
Trihelix	EDA31	AT3G10000	1.36235	0.000897408
HSF	HSFA2	AT2G26150	2.67412	6.68e-194
HSF	HSFB1	AT4G36990	1.50389	1.73e-106
HSF	HSFA6B	AT3G22830	1.2148	3.72e-06
HSF	HSFA4A	AT4G18880	1.03969	2.77e-35
SRS	LRP1	AT5G12330	1.13727	5.16e-28
SRS	SRS7	AT1G19790	1.03187	0.000489018
GRAS	SCL34	AT2G29065	1.36992	1.77e-18
GRAS	RGL1	AT1G66350	1.23486	1.07e-48
GRAS	SCL26	AT4G08250	1.17943	0.0133046
GRAS	SCL9	AT2G37650	1.10463	1.66e-24
GRAS	SCL8	AT5G52510	1.09818	4.03e-56
NF-YB	LEC1	AT1G21970	5.46972	1.14e-18
NF-YB	NFYB6	AT5G47670	2.19289	0.000369723
C2H2	ZAT8	AT3G46080	4.15922	6.95e-141
C2H2	AT3G46070	AT3G46070	3.85228	4.95e-08
C2H2	ZAT12	AT5G59820	3.22776	0
C2H2	ZAT11	AT2G37430	3.19577	8.07e-56
C2H2	AT1G26590	AT1G26590	2.18031	1.02e-10
C2H2	AZF2	AT3G19580	1.99429	2.61e-98
C2H2	JKD	AT5G03150	1.75635	1.69e-90
C2H2	AT1G04445	AT1G04445	1.75405	0.00505164
C2H2	IDD13	AT5G60470	1.70561	8.48e-06
C2H2	ZAT10	AT1G27730	1.64359	2e-162
C2H2	SGR5	AT2G01940	1.6132	8.37e-39
C2H2	ZAT7	AT3G46090	1.28858	1.31e-18
C2H2	ZAT4	AT2G45120	1.28103	5e-10
C2H2	AT3G53600	AT3G53600	1.08932	0.00376633
C3H	PEI1	AT5G07500	6.16362	6.53e-169
C3H	SOM	AT1G03790	4.29107	5.95e-29
C3H	CZF1	AT2G40140	1.61005	0
C3H	AT1G04990	AT1G04990	1.44989	3.73e-165
C3H	ZFN2	AT2G32930	1.40328	1.78e-42
C3H	SZF1	AT3G55980	1.19817	1.48e-170
C3H	AT5G58620	AT5G58620	1.19638	5.99e-74
LBD	LBD42	AT1G68510	5.76086	2.59e-21
LBD	LBD40	AT1G67100	5.62352	0
LBD	LBD16	AT2G42430	2.72652	4.33e-82
LBD	LBD15	AT2G40470	1.50657	3.29e-12
LBD	LBD12	AT2G30130	1.44143	1.94e-12
LBD	LOB	AT5G63090	1.1631	5.44e-13
ARR-B	ARR21	AT5G07210	3.78927	9.28e-08
ARR-B	APRR2	AT4G18020	1.03429	4.68e-65
bZIP	DPBF2	AT3G44460	9.19999	8.43e-77
bZIP	DPBF4	AT2G41070	2.39128	4.88e-210
bZIP	AtbZIP75	AT5G08141	2.01135	0.00896393
bZIP	GBF3	AT2G46270	1.9724	3.52e-97
bZIP	TGA10	AT5G06839	1.87453	8.97e-44
bZIP	BZIP60	AT1G42990	1.59562	4.97e-117
bZIP	TGA7	AT1G77920	1.25432	1.01e-113
bZIP	ABI5	AT2G36270	1.14436	7.06e-09
bZIP	DPBF3	AT3G56850	1.05554	2.26e-59
TALE	BLH8	AT2G27990	1.80127	6.99e-20
TALE	KNAT2	AT1G70510	1.10703	4.9e-05
bHLH	BHLH19	AT2G22760	4.16233	4.61e-31
bHLH	BHLH92	AT5G43650	4.04335	6.22e-29
bHLH	BHLH18	AT2G22750	3.59354	1.81e-19
bHLH	TT8	AT4G09820	2.83793	7.37e-89
bHLH	BHLH120	AT5G51790	2.83788	3.87e-60
bHLH	AT1G10585	AT1G10585	2.72293	1.06e-47
bHLH	BHLH109	AT1G68240	2.55938	3.87e-15
bHLH	BHLH113	AT3G19500	2.54906	5.17e-35
bHLH	BHLH25	AT4G37850	2.29451	1.06e-35
bHLH	SPT	AT4G36930	1.97051	2.08e-150
bHLH	BHLH96	AT1G72210	1.84982	5.97e-45
bHLH	AT1G10586	AT1G10586	1.71004	0.0223344
bHLH	HEC1	AT5G67060	1.49943	1.69e-17
bHLH	BHLH41	AT5G56960	1.34573	0.0446483
bHLH	BHLH100	AT2G41240	1.19601	0.00298246
bHLH	BHLH76	AT1G26260	1.16532	2.54e-20
bHLH	BHLH23	AT4G28790	1.02917	1.52e-11
bHLH	ORG2	AT3G56970	1.02528	0.00902012
NF-YC	NFYC2	AT1G56170	1.80101	1.67e-106
Nin-like	RKD5	AT4G35590	1.32305	7.52e-06
CO-like	COL1	AT5G15850	1.54074	1.48e-48
G2-like	AT3G12730	AT3G12730	2.04204	3.05e-99
G2-like	MYBC1	AT2G40970	1.04336	1.18e-25
G2-like	BOA	AT5G59570	1.01956	2.01e-09
GeBP	AT4G00250	AT4G00250	1.34674	3.48e-05
Dof	DOF4.7	AT4G38000	1.9447	0.00587931
Dof	DOF3.6	AT3G55370	1.374	1.55e-26
TCP	TCP9	AT2G45680	1.00174	2.48e-28
MYB	MYB15	AT3G23250	5.04632	0
MYB_related	TCL1	AT2G30432	3.6858	6.03e-79
MYB_related	AT2G44430	AT2G44430	1.22921	1.9e-41
M-type_MADS	AGL85	AT1G54760	2.30222	0.00219787
M-type_MADS	AGL80	AT5G48670	1.80722	4.27e-14
