# Supplementary material for: A FUS3-VAL transcriptional negative feedback circuit terminates seed maturation program and safeguards vegetative development
Source: Research Square preprint supplement (doi:10.21203/rs.3.rs-7986565/v1), 2025-11-12
Supplement: Supplementary file 3 [file 5c21d7e712cf9468a5efc5f0.xlsx]

## Sheet: FUS3-FG-target genes
ID	name
AT1G01010	NAC001
AT1G01020	ARV1
AT1G01030	NGA3
AT1G01040	DCL1
AT1G01050	PPA1
AT1G01060	LHY
AT1G01070	AT1G01070
AT1G01073	AT1G01073
AT1G01090	PDH-E1 ALPHA
AT1G01100	RPP1A
AT1G01115	AT1G01115
AT1G01120	KCS1
AT1G01130	AT1G01130
AT1G01140	CIPK9
AT1G01170	AT1G01170
AT1G01180	AT1G01180
AT1G01183	MIR165A
AT1G01190	CYP78A8
AT1G01210	AT1G01210
AT1G01220	FKGP
AT1G01225	AT1G01225
AT1G01230	AT1G01230
AT1G01240	AT1G01240
AT1G01250	ERF023
AT1G01270	AT1G01270
AT1G01290	CNX3
AT1G01300	AT1G01300
AT1G01305	AT1G01305
AT1G01320	AT1G01320
AT1G01360	PYL9
AT1G01380	ETC1
AT1G01390	UGT72B2
AT1G01420	UGT72B3
AT1G01430	TBL25
AT1G01453	AT1G01453
AT1G01470	LEA14
AT1G01480	ACS2
AT1G01490	AT1G01490
AT1G01510	AN
AT1G01520	RVE3
AT1G01540	AT1G01540
AT1G01550	BPS1
AT1G01580	FRO2
AT1G01600	CYP86A4
AT1G01610	GPAT4
AT1G01620	PIP1-3
AT1G01650	SPPL4
AT1G01690	ATPRD3
AT1G01695	AT1G01695
AT1G01710	AT1G01710
AT1G01720	NAC002
AT1G01725	AT1G01725
AT1G01760	AT1G01760
AT1G01800	AT1G01800
AT1G01810	AT1G01810
AT1G01820	PEX11C
AT1G01830	AT1G01830
AT1G01860	PFC1
AT1G01910	AT1G01910
AT1G01950	ARK2
AT1G01970	AT1G01970
AT1G01990	AT1G01990
AT1G02020	AT1G02020
AT1G02030	ZAT1
AT1G02060	AT1G02060
AT1G02065	SPL8
AT1G02070	AT1G02070
AT1G02120	VAD1
AT1G02130	RABD2A
AT1G02170	AMC1
AT1G02180	AT1G02180
AT1G02205	CER1
AT1G02210	AT1G02210
AT1G02220	NAC003
AT1G02228	AT1G02228
AT1G02230	NAC004
AT1G02270	AT1G02270
AT1G02290	AT1G02290
AT1G02305	AT1G02305
AT1G02310	MAN1
AT1G02335	GL22
AT1G02340	HFR1
AT1G02350	AT1G02350
AT1G02360	AT1G02360
AT1G02380	AT1G02380
AT1G02390	GPAT2
AT1G02391	AT1G02391
AT1G02400	GA2OX6
AT1G02405	AT1G02405
AT1G02410	COX11
AT1G02420	AT1G02420
AT1G02450	NIMIN-1
AT1G02460	AT1G02460
AT1G02475	AT1G02475
AT1G02500	SAM1
AT1G02510	TPK4
AT1G02560	CLPP5
AT1G02590	AT1G02590
AT1G02610	AT1G02610
AT1G02620	AT1G02620
AT1G02630	ETN8
AT1G02640	BXL2
AT1G02650	AT1G02650
AT1G02660	AT1G02660
AT1G02690	IMPA6
AT1G02700	AT1G02700
AT1G02750	DI19-2
AT1G02770	AT1G02770
AT1G02810	PME7
AT1G02813	AT1G02813
AT1G02820	AT1G02820
AT1G02850	BGLU11
AT1G02860	BAH1
AT1G02880	TPK1
AT1G02890	AT1G02890
AT1G02960	AT1G02960
AT1G02970	WEE1
AT1G02980	CUL2
AT1G02990	AT1G02990
AT1G03000	PEX6
AT1G03020	GRXS1
AT1G03022	AT1G03022
AT1G03030	AT1G03030
AT1G03040	BHLH7
AT1G03060	SPI
AT1G03080	NET1D
AT1G03090	MCCA
AT1G03100	AT1G03100
AT1G03106	AT1G03106
AT1G03120	ATRAB28
AT1G03130	PSAD2
AT1G03160	FZL
AT1G03170	FAF2
AT1G03180	AT1G03180
AT1G03200	AT1G03200
AT1G03220	AT1G03220
AT1G03240	AT1G03240
AT1G03290	AT1G03290
AT1G03300	ATDUF1
AT1G03365	RF4
AT1G03370	AT1G03370
AT1G03410	2A6
AT1G03440	AT1G03440
AT1G03445	BSU1
AT1G03457	BRN2
AT1G03470	NET3A
AT1G03475	CPX1
AT1G03510	PCMP-E3
AT1G03520	AT1G03520
AT1G03540	PCMP-E4
AT1G03550	SCAMP2
AT1G03590	PPC6-6
AT1G03610	AT1G03610
AT1G03630	PORC
AT1G03640	AT1G03640
AT1G03687	AT1G03687
AT1G03700	AT1G03700
AT1G03710	AT1G03710
AT1G03720	AT1G03720
AT1G03730	AT1G03730
AT1G03746	AT1G03746
AT1G03760	AT1G03760
AT1G03790	SOM
AT1G03800	ERF10
AT1G03820	AT1G03820
AT1G03830	AT1G03830
AT1G03840	MGP
AT1G03850	GRXS13
AT1G03860	PHB2
AT1G03870	FLA9
AT1G03905	ABCI19
AT1G03910	CTN
AT1G03930	ADK1
AT1G03940	3AT1
AT1G03950	VPS2.3
AT1G03980	PCS2
AT1G03982	RIC8
AT1G04000	AT1G04000
AT1G04010	PSAT
AT1G04030	AT1G04030
AT1G04040	AT1G04040
AT1G04050	SUVR1
AT1G04110	SBT1.2
AT1G04120	ABCC5
AT1G04140	AT1G04140
AT1G04150	AT1G04150
AT1G04170	EIF2 GAMMA
AT1G04180	YUC9
AT1G04200	AT1G04200
AT1G04210	AT1G04210
AT1G04220	KCS17
AT1G04230	AT1G04230
AT1G04240	IAA3
AT1G04250	IAA17
AT1G04260	PRA1D
AT1G04270	RPS15A
AT1G04280	AT1G04280
AT1G04290	AT1G04290
AT1G04300	AT1G04300
AT1G04310	ERS2
AT1G04330	AT1G04330
AT1G04340	AT1G04340
AT1G04350	AT1G04350
AT1G04360	ATL1
AT1G04370	ERF14
AT1G04400	CRY2
AT1G04410	MDH1
AT1G04425	AT1G04425
AT1G04430	AT1G04430
AT1G04480	RPL23C
AT1G04490	AT1G04490
AT1G04500	AT1G04500
AT1G04501	AT1G04501
AT1G04520	CRRSP3
AT1G04530	TPR4
AT1G04550	IAA12
AT1G04555	AT1G04555
AT1G04560	AT1G04560
AT1G04570	AT1G04570
AT1G04590	AT1G04590
AT1G04610	YUC3
AT1G04620	HCAR
AT1G04630	MEE4
AT1G04645	AT1G04645
AT1G04650	AT1G04650
AT1G04670	AT1G04670
AT1G04680	AT1G04680
AT1G04684	AT1G04684
AT1G04700	AT1G04700
AT1G04710	KAT1
AT1G04720	AT1G04720
AT1G04750	VAMP721
AT1G04770	AT1G04770
AT1G04778	AT1G04778
AT1G04780	AT1G04780
AT1G04790	AT1G04790
AT1G04800	AT1G04800
AT1G04820	TUBA4
AT1G04830	AT1G04830
AT1G04840	PCMP-H64
AT1G04910	AT1G04910
AT1G04920	SPS3
AT1G04930	AT1G04930
AT1G04950	TAF6
AT1G04960	AT1G04960
AT1G04980	PDIL2-2
AT1G04985	AT1G04985
AT1G04990	AT1G04990
AT1G05000	AT1G05000
AT1G05010	ACO4
AT1G05020	AP180
AT1G05065	CLE20
AT1G05070	AT1G05070
AT1G05090	AT1G05090
AT1G05100	MAPKKK18
AT1G05120	AT1G05120
AT1G05135	AT1G05135
AT1G05140	ARASP2
AT1G05150	AT1G05150
AT1G05160	KAO1
AT1G05170	B3GALT2
AT1G05200	GLR3.4
AT1G05230	HDG2
AT1G05240	PER1
AT1G05260	PER3
AT1G05270	AT1G05270
AT1G05300	ZIP5
AT1G05340	AT1G05340
AT1G05350	AT1G05350
AT1G05370	AT1G05370
AT1G05380	AT1G05380
AT1G05410	AT1G05410
AT1G05420	OFP12
AT1G05430	AT1G05430
AT1G05440	AT1G05440
AT1G05450	AT1G05450
AT1G05460	SDE3
AT1G05470	CVP2
AT1G05490	CLSY3
AT1G05510	AT1G05510
AT1G05520	AT1G05520
AT1G05530	UGT75B2
AT1G05540	AT1G05540
AT1G05550	AT1G05550
AT1G05560	UGT75B1
AT1G05562	AT1G05562
AT1G05570	CALS1
AT1G05575	AT1G05575
AT1G05620	URH2
AT1G05630	5PTASE13
AT1G05660	AT1G05660
AT1G05680	UGT74E2
AT1G05710	AT1G05710
AT1G05720	AT1G05720
AT1G05750	PDE247
AT1G05800	DGL
AT1G05805	BHLH128
AT1G05835	AT1G05835
AT1G05840	AT1G05840
AT1G05850	CTL1
AT1G05870	AT1G05870
AT1G05900	NTH2
AT1G05910	AT1G05910
AT1G05950	AT1G05950
AT1G05960	AT1G05960
AT1G05970	AT1G05970
AT1G06000	UGT89C1
AT1G06002	AT1G06002
AT1G06020	AT1G06020
AT1G06040	BBX24
AT1G06050	AT1G06050
AT1G06070	AT1G06070
AT1G06080	ADS1
AT1G06110	SKIP16
AT1G06130	GLX2-4
AT1G06148	AT1G06148
AT1G06149	CPuORF8
AT1G06160	ERF094
AT1G06180	ATMYB13
AT1G06190	RHON1
AT1G06200	AT1G06200
AT1G06230	GTE4
AT1G06270	AT1G06270
AT1G06290	ACX3
AT1G06310	ACX3.2
AT1G06320	AT1G06320
AT1G06330	AT1G06330
AT1G06340	AT1G06340
AT1G06360	AT1G06360
AT1G06370	AT1G06370
AT1G06390	ASK9
AT1G06400	RABA1A
AT1G06410	TPS7
AT1G06420	AT1G06420
AT1G06430	FTSH8
AT1G06475	AT1G06475
AT1G06480	AT1G06480
AT1G06490	CALS7
AT1G06510	AT1G06510
AT1G06520	GPAT1
AT1G06530	PMD2
AT1G06570	PDS1
AT1G06630	AT1G06630
AT1G06640	AT1G06640
AT1G06645	AT1G06645
AT1G06650	AT1G06650
AT1G06680	PSBP1
AT1G06700	PTI11
AT1G06710	AT1G06710
AT1G06740	AT1G06740
AT1G06760	AT1G06760
AT1G06770	DRIP1
AT1G06780	GAUT6
AT1G06790	AT1G06790
AT1G06800	PLA-I{gamma}1
AT1G06810	AT1G06810
AT1G06840	AT1G06840
AT1G06850	AtbZIP52
AT1G06860	AT1G06860
AT1G06880	AT1G06880
AT1G06890	AT1G06890
AT1G06925	AT1G06925
AT1G06930	AT1G06930
AT1G06980	AT1G06980
AT1G06990	AT1G06990
AT1G07030	AT1G07030
AT1G07040	AT1G07040
AT1G07080	AT1G07080
AT1G07090	LSH6
AT1G07100	AT1G07100
AT1G07110	FKFBP
AT1G07128	AT1G07128
AT1G07135	AT1G07135
AT1G07140	RANBP1A
AT1G07150	MAPKKK13
AT1G07175	AT1G07175
AT1G07180	NDA1
AT1G07200	AT1G07200
AT1G07210	AT1G07210
AT1G07220	AT1G07220
AT1G07230	NPC1
AT1G07250	UGT71C4
AT1G07260	UGT71C3
AT1G07270	CDC6B
AT1G07280	AT1G07280
AT1G07310	AT1G07310
AT1G07350	SR45A
AT1G07360	AT1G07360
AT1G07390	AtRLP1
AT1G07400	HSP17.8
AT1G07420	SMO2-2
AT1G07430	AIP1
AT1G07440	AT1G07440
AT1G07470	AT1G07470
AT1G07480	AT1G07480
AT1G07485	AT1G07485
AT1G07500	AT1G07500
AT1G07520	SCL31
AT1G07530	SCL14
AT1G07540	TRP5
AT1G07570	APK1A
AT1G07580	AT1G07580
AT1G07590	AT1G07590
AT1G07600	MT1A
AT1G07610	MT1C
AT1G07630	PLL5
AT1G07640	DOF1.1
AT1G07645	ATDSI-1VOC
AT1G07650	AT1G07650
AT1G07670	ECA4
AT1G07680	AT1G07680
AT1G07700	AT1G07700
AT1G07710	AT1G07710
AT1G07720	KCS3
AT1G07725	ATEXO70H6
AT1G07728	AT1G07728
AT1G07745	RAD51D
AT1G07750	AT1G07750
AT1G07760	AT1G07760
AT1G07770	RPS15AA
AT1G07800	AT1G07800
AT1G07820	AT1G07820
AT1G07840	AT1G07840
AT1G07870	AT1G07870
AT1G07885	AT1G07885
AT1G07900	LBD1
AT1G07901	AT1G07901
AT1G07910	ATRNL
AT1G07920	A3
AT1G07930	A3
AT1G07940	A3
AT1G07950	MED22B
AT1G07980	NF-YC10
AT1G07990	AT1G07990
AT1G08030	TPST
AT1G08040	AT1G08040
AT1G08060	MOM1
AT1G08080	ACA7
AT1G08090	NRT2.1
AT1G08100	NRT2.2
AT1G08110	AT1G08110
AT1G08115	AT1G08115
AT1G08130	LIG1
AT1G08170	AT1G08170
AT1G08180	SMR2
AT1G08190	VPS41
AT1G08200	AXS2
AT1G08210	AT1G08210
AT1G08230	GAT1
AT1G08250	ADT6
AT1G08300	NVL
AT1G08315	AT1G08315
AT1G08320	TGA9
AT1G08340	ROPGAP5
AT1G08370	DCP1
AT1G08380	PSAO
AT1G08420	BSL2
AT1G08440	ALMT2
AT1G08450	CRT3
AT1G08460	HDA8
AT1G08465	YAB2
AT1G08470	SSL3
AT1G08490	NFS2
AT1G08500	ENODL18
AT1G08510	FATB
AT1G08530	AT1G08530
AT1G08570	ACHT4
AT1G08580	AT1G08580
AT1G08630	THA1
AT1G08640	CJD1
AT1G08650	PPCK1
AT1G08660	MGP2
AT1G08680	AGD14
AT1G08695	SCRL3
AT1G08700	PS1
AT1G08720	EDR1
AT1G08760	AT1G08760
AT1G08820	PVA22
AT1G08830	CSD1
AT1G08845	AT1G08845
AT1G08860	BON3
AT1G08870	AT1G08870
AT1G08880	HTA5
AT1G08910	AT1G08910
AT1G08920	SUGTL2
AT1G08930	ERD6
AT1G08940	AT1G08940
AT1G08950	AT1G08950
AT1G08970	NFYC9
AT1G08990	GUX5
AT1G09000	ANP1
AT1G09010	EBM
AT1G09040	AT1G09040
AT1G09050	AT1G09050
AT1G09070	SRC2
AT1G09080	MED37B
AT1G09130	CLPR3
AT1G09140	SR30
AT1G09155	PP2B15
AT1G09157	AT1G09157
AT1G09160	AT1G09160
AT1G09180	ATSAR1
AT1G09200	HTR2
AT1G09210	CRT2
AT1G09230	SNRNP65
AT1G09245	AT1G09245
AT1G09250	BHLH149
AT1G09290	AT1G09290
AT1G09310	AT1G09310
AT1G09350	GOLS3
AT1G09380	AT1G09380
AT1G09390	AT1G09390
AT1G09420	G6PD4
AT1G09440	AT1G09440
AT1G09460	AT1G09460
AT1G09470	AT1G09470
AT1G09480	AT1G09480
AT1G09500	AT1G09500
AT1G09520	AT1G09520
AT1G09530	PIF3
AT1G09540	MYB61
AT1G09560	GLP4
AT1G09570	PHYA
AT1G09575	AT1G09575
AT1G09580	AT1G09580
AT1G09590	RPL21A
AT1G09600	AT1G09600
AT1G09630	RABA2A
AT1G09645	AT1G09645
AT1G09650	AT1G09650
AT1G09680	AT1G09680
AT1G09750	AT1G09750
AT1G09780	PGM1
AT1G09794	AT1G09794
AT1G09795	HISN1B
AT1G09800	AT1G09800
AT1G09810	ECT11
AT1G09830	PUR2
AT1G09850	XBCP3
AT1G09870	AT1G09870
AT1G09880	AT1G09880
AT1G09910	AT1G09910
AT1G09940	HEMA2
AT1G09950	RAS1
AT1G09960	SUC4
AT1G09970	LRR XI-23
AT1G09980	AT1G09980
AT1G10020	AT1G10020
AT1G10060	BCAT1
AT1G10070	BCAT2
AT1G10090	AT1G10090
AT1G10120	BHLH74
AT1G10130	ECA3
AT1G10150	PP2A10
AT1G10180	EXO84C
AT1G10200	WLIM1
AT1G10220	AT1G10220
AT1G10230	ASK18
AT1G10240	FRS11
AT1G10270	GRP23
AT1G10280	AT1G10280
AT1G10300	AT1G10300
AT1G10320	AT1G10320
AT1G10350	AT1G10350
AT1G10360	GSTU18
AT1G10370	GSTU17
AT1G10380	AT1G10380
AT1G10385	EXO84A
AT1G10390	NUP98A
AT1G10410	AT1G10410
AT1G10417	AT1G10417
AT1G10440	AT1G10440
AT1G10460	GLP7
AT1G10470	ARR4
AT1G10480	ZFP5
AT1G10490	AT1G10490
AT1G10500	ISCA
AT1G10520	AT1G10520
AT1G10522	AT1G10522
AT1G10530	AT1G10530
AT1G10540	NAT8
AT1G10550	XTH33
AT1G10560	PUB18
AT1G10570	ULP1C
AT1G10580	AT1G10580
AT1G10590	AT1G10590
AT1G10640	AT1G10640
AT1G10650	AT1G10650
AT1G10652	AT1G10652
AT1G10657	AT1G10657
AT1G10660	AT1G10660
AT1G10680	ABCB10
AT1G10682	AT1G10682
AT1G10690	AT1G10690
AT1G10700	PRS3
AT1G10730	AP1M1
AT1G10740	AT1G10740
AT1G10747	ESF1.1
AT1G10750	AT1G10750
AT1G10760	GWD1
AT1G10770	AT1G10770
AT1G10840	TIF3H1
AT1G10850	AT1G10850
AT1G10865	AT1G10865
AT1G10890	AT1G10890
AT1G10910	AT1G10910
AT1G10920	LOV1
AT1G10930	RECQL4A
AT1G10940	SRK2A
AT1G10960	FD1
AT1G10990	AT1G10990
AT1G11010	AT1G11010
AT1G11050	AT1G11050
AT1G11060	AT1G11060
AT1G11070	AT1G11070
AT1G11080	SCPL31
AT1G11090	AT1G11090
AT1G11112	AT1G11112
AT1G11120	AT1G11120
AT1G11125	AT1G11125
AT1G11130	SUB
AT1G11160	AT1G11160
AT1G11170	AT1G11170
AT1G11200	AT1G11200
AT1G11210	AT1G11210
AT1G11220	AT1G11220
AT1G11230	AT1G11230
AT1G11240	AT1G11240
AT1G11250	SYP125
AT1G11260	STP1
AT1G11270	AT1G11270
AT1G11280	AT1G11280
AT1G11290	PCMP-H40
AT1G11310	MLO2
AT1G11320	AT1G11320
AT1G11330	AT1G11330
AT1G11370	PME56
AT1G11390	AT1G11390
AT1G11420	ATDUF2
AT1G11440	AT1G11440
AT1G11450	AT1G11450
AT1G11480	AT1G11480
AT1G11530	CXXS1
AT1G11545	XTH8
AT1G11572	AT1G11572
AT1G11580	PME18
AT1G11590	PME19
AT1G11600	CYP77B1
AT1G11620	AT1G11620
AT1G11630	AT1G11630
AT1G11655	AT1G11655
AT1G11660	HSP70-16
AT1G11670	AT1G11670
AT1G11680	CYP51G1
AT1G11690	AT1G11690
AT1G11700	AT1G11700
AT1G11710	AT1G11710
AT1G11720	SS3
AT1G11735	MIR171B
AT1G11740	AT1G11740
AT1G11770	AT1G11770
AT1G11800	AT1G11800
AT1G11820	AT1G11820
AT1G11840	ATGLX1
AT1G11850	AT1G11850
AT1G11860	GDCST
AT1G11880	AT1G11880
AT1G11905	AT1G11905
AT1G11910	APA1
AT1G11940	AT1G11940
AT1G11950	AT1G11950
AT1G11960	AT1G11960
AT1G12000	PFP-BETA1
AT1G12015	AT1G12015
AT1G12020	AT1G12020
AT1G12030	AT1G12030
AT1G12060	BAG5
AT1G12070	AT1G12070
AT1G12080	AT1G12080
AT1G12090	ELP
AT1G12100	AT1G12100
AT1G12110	NPF6.3
AT1G12120	AT1G12120
AT1G12150	AT1G12150
AT1G12190	AT1G12190
AT1G12200	AT1G12200
AT1G12210	RFL1
AT1G12230	AT1G12230
AT1G12240	BFRUCT4
AT1G12260	NAC007
AT1G12270	HOP1
AT1G12290	AT1G12290
AT1G12300	AT1G12300
AT1G12330	AT1G12330
AT1G12340	AT1G12340
AT1G12360	KEU
AT1G12370	PHR1
AT1G12380	AT1G12380
AT1G12390	AT1G12390
AT1G12410	CLPR2
AT1G12411	AT1G12411
AT1G12420	ACR8
AT1G12430	ARK3
AT1G12440	SAP1
AT1G12450	AT1G12450
AT1G12500	AT1G12500
AT1G12510	AT1G12510
AT1G12540	BHLH55
AT1G12550	HPR3
AT1G12560	EXPA7
AT1G12580	PEPKR1
AT1G12590	AT1G12590
AT1G12600	UTR4
AT1G12610	DREB1F
AT1G12630	ERF027
AT1G12640	LPLAT1
AT1G12663	AT1G12663
AT1G12665	AT1G12665
AT1G12670	AT1G12670
AT1G12672	AT1G12672
AT1G12680	PEPKR2
AT1G12710	P2A12
AT1G12730	AT1G12730
AT1G12740	CYP87A2
AT1G12750	RBL6
AT1G12780	UGE1
AT1G12790	AT1G12790
AT1G12800	AT1G12800
AT1G12810	AT1G12810
AT1G12820	AFB3
AT1G12840	VHA-C
AT1G12845	AT1G12845
AT1G12860	SCRM2
AT1G12870	AT1G12870
AT1G12890	ERF088
AT1G12900	GAPA2
AT1G12920	ERF1-2
AT1G12950	RSH2
AT1G12970	PIRL3
AT1G12980	ESR1
AT1G12990	AT1G12990
AT1G13020	EIF4B2
AT1G13060	PBE1
AT1G13080	CYP71B2
AT1G13090	CYP71B28
AT1G13130	AT1G13130
AT1G13170	ORP1D
AT1G13180	ARP3
AT1G13195	AT1G13195
AT1G13210	ALA11
AT1G13220	CRWN2
AT1G13230	PII-2
AT1G13240	AT1G13240
AT1G13245	RTFL17
AT1G13250	GATL3
AT1G13260	RAV1
AT1G13280	AOC4
AT1G13300	HRS1
AT1G13310	AT1G13310
AT1G13350	AT1G13350
AT1G13360	AT1G13360
AT1G13370	AT1G13370
AT1G13380	AT1G13380
AT1G13390	AT1G13390
AT1G13400	JGL
AT1G13430	STO9
AT1G13440	GAPC2
AT1G13450	GT-1
AT1G13470	AT1G13470
AT1G13560	AAPT1
AT1G13570	AT1G13570
AT1G13590	PSK1
AT1G13605	AT1G13605
AT1G13609	AT1G13609
AT1G13610	AT1G13610
AT1G13620	RGF2
AT1G13630	AT1G13630
AT1G13640	PI4KG6
AT1G13650	AT1G13650
AT1G13690	ATE1
AT1G13700	PGL1
AT1G13710	CYP78A5
AT1G13720	AT1G13720
AT1G13740	AFP2
AT1G13750	PAP1
AT1G13755	AT1G13755
AT1G13770	RUS3
AT1G13780	AT1G13780
AT1G13800	AT1G13800
AT1G13860	QUL1
AT1G13930	AT1G13930
AT1G13940	AT1G13940
AT1G13950	ELF5A-1
AT1G13960	WRKY4
AT1G13980	GN
AT1G13990	AT1G13990
AT1G14000	VIK
AT1G14010	AT1G14010
AT1G14040	PHO1
AT1G14090	AT1G14090
AT1G14120	AT1G14120
AT1G14160	AT1G14160
AT1G14170	AT1G14170
AT1G14200	AT1G14200
AT1G14205	AT1G14205
AT1G14210	AT1G14210
AT1G14230	APY4
AT1G14240	APY3
AT1G14260	AT1G14260
AT1G14270	AT1G14270
AT1G14290	SBH2
AT1G14300	AT1G14300
AT1G14320	RPL10A
AT1G14330	AT1G14330
AT1G14340	AT1G14340
AT1G14345	AT1G14345
AT1G14350	FLP
AT1G14360	UTR3
AT1G14400	UBC1
AT1G14430	AT1G14430
AT1G14440	ZHD4
AT1G14450	AT1G14450
AT1G14460	F14L17.24
AT1G14490	AHL28
AT1G14518	AT1G14518
AT1G14520	MIOX1
AT1G14530	THH1
AT1G14560	AT1G14560
AT1G14570	PUX7
AT1G14580	IDD6
AT1G14590	AT1G14590
AT1G14600	AT1G14600
AT1G14620	DECOY
AT1G14685	BPC2
AT1G14687	ZHD14
AT1G14690	MAP65-7
AT1G14700	PAP3
AT1G14710	AT1G14710
AT1G14720	XTH28
AT1G14730	CYB561C
AT1G14740	OBE3
AT1G14750	SDS
AT1G14755	AT1G14755
AT1G14770	AT1G14770
AT1G14780	AT1G14780
AT1G14790	RDR1
AT1G14820	AT1G14820
AT1G14830	DRP1C
AT1G14840	MAP70.4
AT1G14860	NUDT18
AT1G14870	PCR2
AT1G14890	AT1G14890
AT1G14900	HMGA
AT1G14910	AT1G14910
AT1G14920	GAI
AT1G14930	AT1G14930
AT1G14950	AT1G14950
AT1G14960	AT1G14960
AT1G14970	AT1G14970
AT1G14990	AT1G14990
AT1G15030	AT1G15030
AT1G15040	AT1G15040
AT1G15060	AT1G15060
AT1G15090	AT1G15090
AT1G15100	RHA2A
AT1G15110	PSS1
AT1G15120	AT1G15120
AT1G15125	AT1G15125
AT1G15140	AT1G15140
AT1G15165	AT1G15165
AT1G15175	AT1G15175
AT1G15190	FLA19
AT1G15200	AT1G15200
AT1G15215	SHH1
AT1G15220	CCMH
AT1G15230	AT1G15230
AT1G15250	RPL37A
AT1G15270	AT1G15270
AT1G15290	AT1G15290
AT1G15300	AT1G15300
AT1G15310	SRP-54A
AT1G15320	AT1G15320
AT1G15340	MBD10
AT1G15350	AT1G15350
AT1G15360	WIN1
AT1G15370	AT1G15370
AT1G15380	AT1G15380
AT1G15400	AT1G15400
AT1G15410	AT1G15410
AT1G15420	AT1G15420
AT1G15440	PWP2
AT1G15460	BOR4
AT1G15480	AT1G15480
AT1G15490	AT1G15490
AT1G15500	AATP2
AT1G15520	ABCG40
AT1G15530	LECRKS1
AT1G15550	GA3OX1
AT1G15570	CYCA2-3
AT1G15580	IAA5
AT1G15600	AT1G15600
AT1G15630	AT1G15630
AT1G15650	AT1G15650
AT1G15670	AT1G15670
AT1G15680	AT1G15680
AT1G15690	AVP1
AT1G15720	TRFL5
AT1G15740	AT1G15740
AT1G15750	TPL
AT1G15757	AT1G15757
AT1G15800	AT1G15800
AT1G15820	LHCB6
AT1G15840	AT1G15840
AT1G15860	AT1G15860
AT1G15870	AT1G15870
AT1G15910	FDM1
AT1G15920	CAF1-2
AT1G15930	RPS12A
AT1G15940	AT1G15940
AT1G15950	CCR1
AT1G15960	NRAMP6
AT1G15970	AT1G15970
AT1G16000	AT1G16000
AT1G16010	MRS2-1
AT1G16060	ADAP
AT1G16150	WAKL4
AT1G16170	AT1G16170
AT1G16190	RAD23A
AT1G16210	AT1G16210
AT1G16240	SYP51
AT1G16270	AT1G16270
AT1G16300	GAPCP2
AT1G16330	CYCB3
AT1G16360	ALIS4
AT1G16390	45933
AT1G16410	CYP79F1
AT1G16420	AMC8
AT1G16430	MED22A
AT1G16460	STR2
AT1G16480	AT1G16480
AT1G16490	ATMYB58
AT1G16500	AT1G16500
AT1G16510	SAUR41
AT1G16515	AT1G16515
AT1G16530	LBD3
AT1G16560	AT1G16560
AT1G16635	AT1G16635
AT1G16660	AT1G16660
AT1G16670	AT1G16670
AT1G16680	AT1G16680
AT1G16700	AT1G16700
AT1G16705	AT1G16705
AT1G16710	HAC12
AT1G16720	HCF173
AT1G16730	UP6
AT1G16750	AT1G16750
AT1G16760	AT1G16760
AT1G16770	AT1G16770
AT1G16780	VHP2
AT1G16820	AT1G16820
AT1G16850	AT1G16850
AT1G16860	AT1G16860
AT1G16870	AT1G16870
AT1G16890	UBC36
AT1G16916	AT1G16916
AT1G16920	RABA1B
AT1G16970	KU70
AT1G17010	AT1G17010
AT1G17040	SHA
AT1G17050	SPS2
AT1G17060	CYP72C1
AT1G17070	STIPL1
AT1G17080	AT1G17080
AT1G17090	AT1G17090
AT1G17120	CAT8
AT1G17130	AT1G17130
AT1G17140	ICR1
AT1G17145	AT1G17145
AT1G17147	VQ1
AT1G17150	AT1G17150
AT1G17180	GSTU25
AT1G17190	GSTU26
AT1G17200	AT1G17200
AT1G17210	ATILP1
AT1G17230	AT1G17230
AT1G17235	RTFL11
AT1G17280	UBC34
AT1G17290	ALAAT1
AT1G17340	SAC5
AT1G17345	AT1G17345
AT1G17350	AT1G17350
AT1G17360	AT1G17360
AT1G17370	UBP1B
AT1G17380	TIFY11A
AT1G17400	AT1G17400
AT1G17410	AT1G17410
AT1G17420	LOX3
AT1G17430	AT1G17430
AT1G17440	TAF12B
AT1G17460	TRFL3
AT1G17495	AT1G17495
AT1G17500	ALA4
AT1G17510	AT1G17510
AT1G17520	AT1G17520
AT1G17550	HAB2
AT1G17560	HLL
AT1G17590	NFYA8
AT1G17615	AT1G17615
AT1G17620	AT1G17620
AT1G17630	PCMP-E72
AT1G17650	GLYR2
AT1G17660	AT1G17660
AT1G17700	PRA1F1
AT1G17710	AT1G17710
AT1G17720	PP2AB2
AT1G17744	AT1G17744
AT1G17760	CSTF77
AT1G17780	AT1G17780
AT1G17790	GTE5
AT1G17810	TIP3-2
AT1G17820	AT1G17820
AT1G17830	AT1G17830
AT1G17840	ABCG11
AT1G17850	STR8
AT1G17880	BTF3
AT1G17890	GER2
AT1G17910	WAKL13
AT1G17920	HDG12
AT1G17940	AT1G17940
AT1G18060	AT1G18060
AT1G18070	AT1G18070
AT1G18100	MFT
AT1G18140	LAC1
AT1G18150	MPK8
AT1G18180	AT1G18180
AT1G18190	GC2
AT1G18191	AT1G18191
AT1G18200	RABA6B
AT1G18210	CML27
AT1G18250	ATLP-1
AT1G18260	HRD3A
AT1G18270	AT1G18270
AT1G18290	AT1G18290
AT1G18300	NUDT4
AT1G18310	AT1G18310
AT1G18330	RVE7
AT1G18335	AT1G18335
AT1G18340	AT1G18340
AT1G18370	NACK1
AT1G18382	AT1G18382
AT1G18400	BEE1
AT1G18410	AT1G18410
AT1G18415	AT1G18415
AT1G18460	AT1G18460
AT1G18470	AT1G18470
AT1G18500	IPMS1
AT1G18540	RPL6A
AT1G18560	AT1G18560
AT1G18570	MYB51
AT1G18580	GAUT11
AT1G18610	AT1G18610
AT1G18620	AT1G18620
AT1G18640	PSP
AT1G18650	PDCB3
AT1G18670	IBS1
AT1G18680	AT1G18680
AT1G18700	AT1G18700
AT1G18710	AtMYB47
AT1G18720	AT1G18720
AT1G18730	PNSB4
AT1G18740	AT1G18740
AT1G18745	AT1G18745
AT1G18760	AT1G18760
AT1G18800	NRP2
AT1G18820	AT1G18820
AT1G18835	MIF3
AT1G18840	IQD30
AT1G18850	AT1G18850
AT1G18870	ICS2
AT1G18879	MIR837A
AT1G18890	CPK10
AT1G18900	AT1G18900
AT1G18910	AT1G18910
AT1G18940	AT1G18940
AT1G18950	AT1G18950
AT1G18970	GLP1
AT1G18990	MYOB5
AT1G19000	AT1G19000
AT1G19010	AT1G19010
AT1G19050	ARR7
AT1G19060	AT1G19060
AT1G19086	AT1G19086
AT1G19100	AT1G19100
AT1G19110	AT1G19110
AT1G19115	AT1G19115
AT1G19140	AT1G19140
AT1G19160	AT1G19160
AT1G19180	TIFY10A
AT1G19190	CXE1
AT1G19210	ERF017
AT1G19220	ARF19
AT1G19230	RBOHE
AT1G19250	FMO1
AT1G19260	AT1G19260
AT1G19270	DA1
AT1G19300	GATL1
AT1G19310	AT1G19310
AT1G19330	AT1G19330
AT1G19350	BZR2
AT1G19380	AT1G19380
AT1G19400	AT1G19400
AT1G19420	AT1G19420
AT1G19430	AT1G19430
AT1G19440	KCS4
AT1G19460	AT1G19460
AT1G19464	MIR864A
AT1G19485	AT1G19485
AT1G19490	AT1G19490
AT1G19530	AT1G19530
AT1G19540	AT1G19540
AT1G19570	DHAR1
AT1G19610	PDF1.4
AT1G19630	CYP722A1
AT1G19640	JMT
AT1G19650	SFH4
AT1G19660	BBD2
AT1G19670	CLH1
AT1G19700	BLH10
AT1G19710	AT1G19710
AT1G19720	DYW7
AT1G19730	TRX4
AT1G19770	PUP14
AT1G19780	CNGC8
AT1G19800	TGD1
AT1G19810	AT1G19810
AT1G19830	AT1G19830
AT1G19835	FPP4
AT1G19840	AT1G19840
AT1G19850	ARF5
AT1G19870	IQD32
AT1G19890	MGH3
AT1G19900	AT1G19900
AT1G19910	VHA-C2
AT1G19920	APS2
AT1G19940	AtGH9B5
AT1G19950	HVA22H
AT1G19960	AT1G19960
AT1G19968	AT1G19968
AT1G19970	AT1G19970
AT1G20010	TUBB5
AT1G20030	AT1G20030
AT1G20065	AT1G20065
AT1G20070	AT1G20070
AT1G20090	ARAC4
AT1G20100	AT1G20100
AT1G20132	AT1G20132
AT1G20170	AT1G20170
AT1G20190	EXPA11
AT1G20200	RPN3A
AT1G20220	AT1G20220
AT1G20225	AT1G20225
AT1G20250	AT1G20250
AT1G20270	P4H3
AT1G20310	AT1G20310
AT1G20330	SMT2
AT1G20340	DRT112
AT1G20370	AT1G20370
AT1G20375	MIR394A
AT1G20380	AT1G20380
AT1G20405	AT1G20405
AT1G20410	AT1G20410
AT1G20430	AT1G20430
AT1G20440	COR47
AT1G20460	AT1G20460
AT1G20480	4CLL2
AT1G20490	AT1G20490
AT1G20510	4CLL5
AT1G20520	AT1G20520
AT1G20530	AT1G20530
AT1G20540	AT1G20540
AT1G20560	AAE1
AT1G20575	AT1G20575
AT1G20620	CAT3
AT1G20630	CAT1
AT1G20640	NLP4
AT1G20650	AT1G20650
AT1G20657	AT1G20657
AT1G20670	AT1G20670
AT1G20691	AT1G20691
AT1G20696	HMGB3
AT1G20790	AT1G20790
AT1G20810	FKBP18
AT1G20820	AT1G20820
AT1G20823	ATL80
AT1G20840	MSSP1
AT1G20860	PHT1-8
AT1G20875	AT1G20875
AT1G20890	AT1G20890
AT1G20900	AHL27
AT1G20925	AT1G20925
AT1G20930	CDKB2-2
AT1G20940	AT1G20940
AT1G20960	emb1507
AT1G20967	AT1G20967
AT1G20980	SPL14
AT1G20990	AT1G20990
AT1G21000	AT1G21000
AT1G21010	AT1G21010
AT1G21020	AT1G21020
AT1G21050	AT1G21050
AT1G21060	AT1G21060
AT1G21065	AT1G21065
AT1G21070	AT1G21070
AT1G21080	AT1G21080
AT1G21090	AT1G21090
AT1G21100	AT1G21100
AT1G21110	AT1G21110
AT1G21130	AT1G21130
AT1G21140	AT1G21140
AT1G21150	AT1G21150
AT1G21290	AT1G21290
AT1G21310	EXT3
AT1G21320	AT1G21320
AT1G21327	AT1G21327
AT1G21360	GLTP2
AT1G21370	AT1G21370
AT1G21380	AT1G21380
AT1G21395	AT1G21395
AT1G21400	F24J8.4
AT1G21410	SKP2A
AT1G21450	SCL1
AT1G21460	SWEET1
AT1G21500	AT1G21500
AT1G21520	AT1G21520
AT1G21525	AT1G21525
AT1G21560	AT1G21560
AT1G21580	AT1G21580
AT1G21590	AT1G21590
AT1G21640	NADK2
AT1G21650	SECA2
AT1G21660	AT1G21660
AT1G21670	AT1G21670
AT1G21680	AT1G21680
AT1G21695	AT1G21695
AT1G21710	OGG1
AT1G21730	AT1G21730
AT1G21738	AT1G21738
AT1G21750	PDIL1-1
AT1G21760	SKIP32
AT1G21770	AT1G21770
AT1G21790	AT1G21790
AT1G21800	AT1G21800
AT1G21830	AT1G21830
AT1G21835	AT1G21835
AT1G21840	UREF
AT1G21880	LYM1
AT1G21890	AT1G21890
AT1G21900	AT1G21900
AT1G21910	ERF012
AT1G21920	AT1G21920
AT1G21940	AT1G21940
AT1G21950	AT1G21950
AT1G21970	NFYB9
AT1G21975	AT1G21975
AT1G21980	PIP5K1
AT1G21990	AT1G21990
AT1G22015	B3GALT5
AT1G22030	AT1G22030
AT1G22040	AT1G22040
AT1G22050	MUB6
AT1G22060	AT1G22060
AT1G22067	AT1G22067
AT1G22070	TGA3
AT1G22100	AT1G22100
AT1G22160	AT1G22160
AT1G22170	AT1G22170
AT1G22180	AT1G22180
AT1G22190	RAP2-13
AT1G22200	AT1G22200
AT1G22220	AT1G22220
AT1G22230	AT1G22230
AT1G22240	APUM8
AT1G22250	AT1G22250
AT1G22260	ZYP1A
AT1G22280	PAPP2C
AT1G22300	GRF10
AT1G22310	MBD8
AT1G22330	AT1G22330
AT1G22360	UGT85A2
AT1G22370	UGT85A5
AT1G22400	UGT85A1
AT1G22403	AT1G22403
AT1G22410	AT1G22410
AT1G22430	AT1G22430
AT1G22460	AT1G22460
AT1G22470	AT1G22470
AT1G22510	AT1G22510
AT1G22520	AT1G22520
AT1G22530	PATL2
AT1G22540	NPF5.10
AT1G22570	NPF5.15
AT1G22590	AGL87
AT1G22600	AT1G22600
AT1G22610	AT1G22610
AT1G22620	SAC1
AT1G22640	MYB3
AT1G22650	INVD
AT1G22690	GASA9
AT1G22710	SUC2
AT1G22720	AT1G22720
AT1G22740	RABG3B
AT1G22767	AT1G22767
AT1G22780	RPS18A
AT1G22790	AT1G22790
AT1G22800	AT1G22800
AT1G22830	PCMP-E24
AT1G22840	CYTC-1
AT1G22850	AT1G22850
AT1G22882	AT1G22882
AT1G22910	AT1G22910
AT1G22920	CSN5B
AT1G22930	AT1G22930
AT1G22940	TH1
AT1G22950	AT1G22950
AT1G22990	HIPP22
AT1G23000	AT1G23000
AT1G23020	FRO3
AT1G23030	PUB11
AT1G23040	AT1G23040
AT1G23050	AT1G23050
AT1G23060	AT1G23060
AT1G23070	AT1G23070
AT1G23074	AT1G23074
AT1G23080	PIN7
AT1G23090	SULTR3
AT1G23100	AT1G23100
AT1G23110	AT1G23110
AT1G23170	AT1G23170
AT1G23190	PGM3
AT1G23200	PME6
AT1G23201	AT1G23201
AT1G23205	AT1G23205
AT1G23210	AtGH9B6
AT1G23220	AT1G23220
AT1G23240	PXG7
AT1G23280	AT1G23280
AT1G23300	AT1G23300
AT1G23310	GGAT1
AT1G23330	AT1G23330
AT1G23350	AT1G23350
AT1G23360	MENG
AT1G23380	KNAT6
AT1G23390	AT1G23390
AT1G23440	AT1G23440
AT1G23490	ARF2-A
AT1G23550	SRO2
AT1G23560	AT1G23560
AT1G23700	AT1G23700
AT1G23710	AT1G23710
AT1G23730	BCA3
AT1G23740	AT1G23740
AT1G23780	SKIP22
AT1G23800	ALDH2B7
AT1G23820	SPDS1
AT1G23860	RSZ21
AT1G23880	AT1G23880
AT1G23890	AT1G23890
AT1G23910	AT1G23910
AT1G23920	AT1G23920
AT1G23930	AT1G23930
AT1G23960	AT1G23960
AT1G23980	ATL47
AT1G23990	AT1G23990
AT1G24000	AT1G24000
AT1G24010	AT1G24010
AT1G24040	AT1G24040
AT1G24080	AT1G24080
AT1G24095	AT1G24095
AT1G24100	UGT74B1
AT1G24120	ATJ16
AT1G24140	AT1G24140
AT1G24148	AT1G24148
AT1G24150	ATFH4
AT1G24160	AT1G24160
AT1G24170	GATL8
AT1G24180	IAR4
AT1G24240	AT1G24240
AT1G24256	AT1G24256
AT1G24260	45903
AT1G24265	AT1G24265
AT1G24267	AT1G24267
AT1G24270	AT1G24270
AT1G24330	PUB6
AT1G24340	EMB260
AT1G24350	AT1G24350
AT1G24388	AT1G24388
AT1G24440	AT1G24440
AT1G24460	AT1G24460
AT1G24470	KCR2
AT1G24530	AT1G24530
AT1G24575	AT1G24575
AT1G24577	AT1G24577
AT1G24580	AT1G24580
AT1G24590	ESR2
AT1G24600	AT1G24600
AT1G24625	ZFP7
AT1G24650	AT1G24650
AT1G24706	THO2
AT1G24733	AT1G24733
AT1G24735	AT1G24735
AT1G24792	AT1G24792
AT1G25220	ASB1
AT1G25240	AT1G25240
AT1G25250	IDD16
AT1G25260	AT1G25260
AT1G25270	AT1G25270
AT1G25275	AT1G25275
AT1G25280	TULP10
AT1G25310	MEE8
AT1G25320	AT1G25320
AT1G25340	MYB116
AT1G25350	OVA9
AT1G25370	AT1G25370
AT1G25375	AT1G25375
AT1G25400	AT1G25400
AT1G25410	IPT6
AT1G25422	AT1G25422
AT1G25425	CLE43
AT1G25440	COL16
AT1G25450	KCS5
AT1G25460	AT1G25460
AT1G25480	ALMT4
AT1G25500	AT1G25500
AT1G25530	AT1G25530
AT1G25540	MED25
AT1G25560	TEM1
AT1G25570	AT1G25570
AT1G25580	NAC008
AT1G26090	AT1G26090
AT1G26130	ALA12
AT1G26150	PERK10
AT1G26160	AT1G26160
AT1G26190	AT1G26190
AT1G26200	AT1G26200
AT1G26208	AT1G26208
AT1G26210	ATSOFL1
AT1G26218	AT1G26218
AT1G26230	CPN60B4
AT1G26240	AT1G26240
AT1G26260	BHLH76
AT1G26270	PI4KG5
AT1G26310	CAL
AT1G26355	SP1L1
AT1G26370	AT1G26370
AT1G26390	AT1G26390
AT1G26410	AT1G26410
AT1G26470	AT1G26470
AT1G26490	AT1G26490
AT1G26550	AT1G26550
AT1G26558	AT1G26558
AT1G26560	BGLU40
AT1G26570	UGD1
AT1G26580	AT1G26580
AT1G26590	AT1G26590
AT1G26600	CLE9
AT1G26620	AT1G26620
AT1G26650	AT1G26650
AT1G26660	AT1G26660
AT1G26670	VTI12
AT1G26680	REM17
AT1G26690	AT1G26690
AT1G26720	AT1G26720
AT1G26730	PHO1-H7
AT1G26750	AT1G26750
AT1G26762	AT1G26762
AT1G26770	EXPA10
AT1G26771	AT1G26771
AT1G26790	DOF1.3
AT1G26800	AT1G26800
AT1G26810	B3GALT15
AT1G26840	ORC6
AT1G26850	AT1G26850
AT1G26870	FEZ
AT1G26900	PCMP-E54
AT1G26916	AT1G26916
AT1G26920	AT1G26920
AT1G26921	AT1G26921
AT1G26930	AT1G26930
AT1G26940	CYP23
AT1G26945	PRE6
AT1G26960	ATHB-23
AT1G26970	AT1G26970
AT1G26973	MIR395A
AT1G26985	MIR395C
AT1G27008	AT1G27008
AT1G27030	AT1G27030
AT1G27040	NPF4.5
AT1G27050	ATHB54
AT1G27070	AT1G27070
AT1G27090	AT1G27090
AT1G27100	AT1G27100
AT1G27110	AT1G27110
AT1G27120	B3GALT17
AT1G27130	GSTU13
AT1G27150	AT1G27150
AT1G27170	AT1G27170
AT1G27200	AT1G27200
AT1G27210	AT1G27210
AT1G27213	AT1G27213
AT1G27220	AT1G27220
AT1G27285	AT1G27285
AT1G27290	AT1G27290
AT1G27300	AT1G27300
AT1G27310	NTF2A
AT1G27330	AT1G27330
AT1G27340	FBX6
AT1G27350	AT1G27350
AT1G27360	SPL11
AT1G27440	IRX10
AT1G27460	NPGR1
AT1G27461	AT1G27461
AT1G27470	AT1G27470
AT1G27500	AT1G27500
AT1G27510	EX2
AT1G27530	AT1G27530
AT1G27540	AT1G27540
AT1G27600	IRX9H
AT1G27630	CYCT1-3
AT1G27640	AT1G27640
AT1G27650	U2AF35A
AT1G27660	BHLH110
AT1G27670	AT1G27670
AT1G27690	AT1G27690
AT1G27700	AT1G27700
AT1G27730	ZAT10
AT1G27740	BHLH54
AT1G27750	AT1G27750
AT1G27752	AT1G27752
AT1G27760	SAT32
AT1G27840	ATCSA-1
AT1G27850	AT1G27850
AT1G27921	AT1G27921
AT1G27930	AT1G27930
AT1G27940	ABCB13
AT1G27950	LTPG1
AT1G27960	ECT9
AT1G27970	NTF2
AT1G27990	AT1G27990
AT1G28007	AT1G28007
AT1G28050	COL15
AT1G28060	AT1G28060
AT1G28070	AT1G28070
AT1G28080	AT1G28080
AT1G28100	AT1G28100
AT1G28110	SCPL45
AT1G28120	AT1G28120
AT1G28130	GH3.17
AT1G28135	AT1G28135
AT1G28150	AT1G28150
AT1G28160	ERF087
AT1G28180	RH44
AT1G28200	FIP1
AT1G28210	ATJ1
AT1G28230	PUP1
AT1G28250	AT1G28250
AT1G28260	SMG7L
AT1G28280	VQ4
AT1G28300	LEC2
AT1G28310	DOF1.4
AT1G28320	DEG15
AT1G28323	AT1G28323
AT1G28330	DYL1
AT1G28340	AtRLP4
AT1G28360	ERF12
AT1G28370	ERF11
AT1G28375	AT1G28375
AT1G28390	AT1G28390
AT1G28395	AT1G28395
AT1G28400	AT1G28400
AT1G28410	AT1G28410
AT1G28430	CYP705A24
AT1G28447	AT1G28447
AT1G28480	GRXC9
AT1G28510	AT1G28510
AT1G28520	VOZ1
AT1G28530	AT1G28530
AT1G28580	AT1G28580
AT1G28591	AT1G28591
AT1G28600	AT1G28600
AT1G28620	AT1G28620
AT1G28630	AT1G28630
AT1G28640	AT1G28640
AT1G28650	AT1G28650
AT1G28660	AT1G28660
AT1G28670	ARAB-1
AT1G28680	AT1G28680
AT1G28690	PCMP-E34
AT1G28760	AT1G28760
AT1G28815	AT1G28815
AT1G28960	NUDT15
AT1G28990	AT1G28990
AT1G29050	TBL38
AT1G29060	AT1G29060
AT1G29070	RPL34
AT1G29090	AT1G29090
AT1G29150	RPN6
AT1G29170	SCAR3
AT1G29195	AT1G29195
AT1G29220	AT1G29220
AT1G29230	CIPK18
AT1G29240	AT1G29240
AT1G29270	AT1G29270
AT1G29280	WRKY65
AT1G29290	AT1G29290
AT1G29300	UNE1
AT1G29320	AT1G29320
AT1G29330	ERD2A
AT1G29340	PUB17
AT1G29360	AT1G29360
AT1G29390	COR413IM2
AT1G29395	COR413IM1
AT1G29400	ML5
AT1G29465	AT1G29465
AT1G29470	AT1G29470
AT1G29530	AT1G29530
AT1G29550	EIF4E3
AT1G29590	eIF4E3
AT1G29600	AT1G29600
AT1G29640	AT1G29640
AT1G29650	AT1G29650
AT1G29660	AT1G29660
AT1G29670	AT1G29670
AT1G29680	AT1G29680
AT1G29690	CAD1
AT1G29700	AT1G29700
AT1G29715	AT1G29715
AT1G29720	RFK1
AT1G29740	AT1G29740
AT1G29785	AT1G29785
AT1G29800	AT1G29800
AT1G29810	AT1G29810
AT1G29840	AT1G29840
AT1G29870	AT1G29870
AT1G29880	GLYRS-1
AT1G29900	CARB
AT1G29910	LHCB1.2
AT1G29920	LHCB1.2
AT1G29930	LHCB1.3
AT1G29950	BHLH144
AT1G29952	CPuORF34
AT1G29970	RPL18AA
AT1G29980	AT1G29980
AT1G30010	AT1G30010
AT1G30016	AT1G30016
AT1G30020	AT1G30020
AT1G30040	GA2OX2
AT1G30050	AT1G30050
AT1G30070	AT1G30070
AT1G30080	AT1G30080
AT1G30090	AT1G30090
AT1G30100	NCED5
AT1G30110	NUDT25
AT1G30120	PDH-E1 BETA
AT1G30130	AT1G30130
AT1G30135	TIFY5A
AT1G30140	AT1G30140
AT1G30170	AT1G30170
AT1G30190	AT1G30190
AT1G30200	AT1G30200
AT1G30210	TCP24
AT1G30220	INT2
AT1G30240	AT1G30240
AT1G30250	AT1G30250
AT1G30260	AT1G30260
AT1G30270	CIPK23
AT1G30280	AT1G30280
AT1G30290	AT1G30290
AT1G30320	AT1G30320
AT1G30330	ARF6
AT1G30340	AT1G30340
AT1G30350	AT1G30350
AT1G30360	ERD4
AT1G30370	AT1G30370
AT1G30380	PSAK
AT1G30400	ABCC1
AT1G30410	ATMRP13
AT1G30430	AT1G30430
AT1G30450	CCC1
AT1G30460	CPSF30
AT1G30475	AT1G30475
AT1G30490	ATHB-9
AT1G30500	NFYA7
AT1G30515	AT1G30515
AT1G30530	UGT78D1
AT1G30570	HERK2
AT1G30580	AT1G30580
AT1G30590	AT1G30590
AT1G30600	AT1G30600
AT1G30620	MUR4
AT1G30630	AT1G30630
AT1G30660	T5I8.11
AT1G30690	PATL4
AT1G30700	AT1G30700
AT1G30720	AT1G30720
AT1G30730	AT1G30730
AT1G30757	AT1G30757
AT1G30780	AT1G30780
AT1G30810	JMJ18
AT1G30820	AT1G30820
AT1G30825	ARPC2A
AT1G30835	SADHU1-2
AT1G30840	PUP4
AT1G30850	RSH4
AT1G30860	AT1G30860
AT1G30870	PER7
AT1G30900	VSR6
AT1G30920	AT1G30920
AT1G30925	AT1G30925
AT1G30950	UFO
AT1G30990	AT1G30990
AT1G31010	OSB4
AT1G31020	ATO2
AT1G31030	AT1G31030
AT1G31040	AT1G31040
AT1G31050	BHLH111
AT1G31070	GLCNAC1PUT1
AT1G31120	POT10
AT1G31130	AT1G31130
AT1G31150	AT1G31150
AT1G31160	HINT 2
AT1G31163	AT1G31163
AT1G31170	SRX
AT1G31173	MIR167D
AT1G31230	AKHSDH1
AT1G31240	AT1G31240
AT1G31258	AT1G31258
AT1G31310	AT1G31310
AT1G31319	AT1G31319
AT1G31320	LBD4
AT1G31330	PSAF
AT1G31340	RUB1
AT1G31350	SKIP25
AT1G31355	AT1G31355
AT1G31358	MIR404
AT1G31410	AT1G31410
AT1G31450	AT1G31450
AT1G31460	AT1G31460
AT1G31480	SGR2
AT1G31500	CCR4-4
AT1G31550	AT1G31550
AT1G31580	ECS1
AT1G31630	AGL86
AT1G31650	ROPGEF14
AT1G31660	AT1G31660
AT1G31690	AT1G31690
AT1G31710	AT1G31710
AT1G31720	AT1G31720
AT1G31730	AT1G31730
AT1G31740	BGAL15
AT1G31750	AT1G31750
AT1G31772	AT1G31772
AT1G31790	PCMP-A1
AT1G31810	FH14
AT1G31812	ACBP6
AT1G31814	FRL2
AT1G31830	AT1G31830
AT1G31835	AT1G31835
AT1G31850	AT1G31850
AT1G31860	HISN2
AT1G31875	AT1G31875
AT1G31880	BRX
AT1G31910	AT1G31910
AT1G31920	PCMP-H11
AT1G31940	AT1G31940
AT1G32049	AT1G32049
AT1G32060	PRK
AT1G32090	AT1G32090
AT1G32100	PRR1
AT1G32110	AT1G32110
AT1G32120	AT1G32120
AT1G32150	bZIP68
AT1G32160	AT1G32160
AT1G32170	XTH30
AT1G32172	AT1G32172
AT1G32180	CSLD6
AT1G32190	AT1G32190
AT1G32200	ATS1
AT1G32225	AT1G32225
AT1G32230	RCD1
AT1G32240	KAN2
AT1G32290	AT1G32290
AT1G32320	MKK10
AT1G32330	HSFA1D
AT1G32337	AT1G32337
AT1G32350	AOX3
AT1G32360	AT1G32360
AT1G32370	TOM2B
AT1G32380	PRS2
AT1G32400	TOM2A
AT1G32410	AT1G32410
AT1G32415	PCMP-E56
AT1G32440	PKP3
AT1G32450	NPF7.3
AT1G32460	AT1G32460
AT1G32530	MIP1
AT1G32540	LOL1
AT1G32550	FdC1
AT1G32582	MIR400
AT1G32640	MYC2
AT1G32650	AT1G32650
AT1G32670	AT1G32670
AT1G32680	AT1G32680
AT1G32690	AT1G32690
AT1G32700	AT1G32700
AT1G32710	AT1G32710
AT1G32730	AT1G32730
AT1G32740	AT1G32740
AT1G32763	AT1G32763
AT1G32770	NAC012
AT1G32780	AT1G32780
AT1G32790	CID11
AT1G32860	AT1G32860
AT1G32870	NAC13
AT1G32900	GBSS1
AT1G32920	AT1G32920
AT1G32928	AT1G32928
AT1G32930	B3GALT6
AT1G32940	SBT3.5
AT1G32990	RPL11
AT1G33050	AT1G33050
AT1G33055	AT1G33055
AT1G33060	NAC014
AT1G33102	AT1G33102
AT1G33110	AT1G33110
AT1G33200	AT1G33200
AT1G33230	AT1G33230
AT1G33240	AT-GTL1
AT1G33250	AT1G33250
AT1G33260	AT1G33260
AT1G33265	FAX4
AT1G33270	AT1G33270
AT1G33280	BRN1
AT1G33330	AT1G33330
AT1G33340	AT1G33340
AT1G33350	PCMP-E57
AT1G33370	AT1G33370
AT1G33390	ATFAS4
AT1G33420	AT1G33420
AT1G33440	NPF4.4
AT1G33450	AT1G33450
AT1G33480	ATL58
AT1G33510	AT1G33510
AT1G33560	ADR1
AT1G33590	AT1G33590
AT1G33600	AT1G33600
AT1G33607	AT1G33607
AT1G33610	AT1G33610
AT1G33680	AT1G33680
AT1G33700	AT1G33700
AT1G33730	CYP76C5
AT1G33750	TPS22
AT1G33760	ERF022
AT1G33780	AT1G33780
AT1G33785	AT1G33785
AT1G33790	JAL4
AT1G33800	GXM3
AT1G33810	AT1G33810
AT1G33811	AT1G33811
AT1G33860	AT1G33860
AT1G33890	AT1G33890
AT1G33950	AT1G33950
AT1G33960	AIG1
AT1G33970	AT1G33970
AT1G34000	OHP2
AT1G34030	RPS18A
AT1G34120	IP5P1
AT1G34150	AT1G34150
AT1G34180	NAC016
AT1G34200	AT1G34200
AT1G34210	SERK2
AT1G34245	EPF2
AT1G34250	AT1G34250
AT1G34260	FAB1D
AT1G34315	AT1G34315
AT1G34360	AT1G34360
AT1G34370	STOP1
AT1G34380	AT1G34380
AT1G34418	AT1G34418
AT1G34430	EMB3003
AT1G34530	AT1G34530
AT1G34550	EMB2756
AT1G34590	AT1G34590
AT1G34630	AT1G34630
AT1G34640	AT1G34640
AT1G34670	AtMYB93
AT1G34770	AT1G34770
AT1G34780	APRL4
AT1G34790	TT1
AT1G35110	AT1G35110
AT1G35115	AT1G35115
AT1G35140	EXL1
AT1G35160	GRF4
AT1G35190	AT1G35190
AT1G35200	AT1G35200
AT1G35220	AT1G35220
AT1G35320	AT1G35320
AT1G35333	AT1G35333
AT1G35340	AT1G35340
AT1G35350	PHO1-H8
AT1G35430	AT1G35430
AT1G35460	BHLH80
AT1G35461	AT1G35461
AT1G35465	AT1G35465
AT1G35467	RALFL5
AT1G35510	AT1G35510
AT1G35513	AT1G35513
AT1G35516	AT1G35516
AT1G35537	AT1G35537
AT1G35545	AT1G35545
AT1G35560	TCP23
AT1G35570	AT1G35570
AT1G35580	CINV1
AT1G35600	AT1G35600
AT1G35614	AT1G35614
AT1G35670	CPK11
AT1G35700	AT1G35700
AT1G35730	APUM9
AT1G35750	APUM10
AT1G35760	AT1G35760
AT1G35780	AT1G35780
AT1G35830	AT1G35830
AT1G35910	TPPD
AT1G36060	ERF055
AT1G36070	AT1G36070
AT1G36105	AT1G36105
AT1G36160	ACC1
AT1G36180	ACC2
AT1G36185	AT1G36185
AT1G36220	AT1G36220
AT1G36350	AT1G36350
AT1G36370	SHM7
AT1G36380	AT1G36380
AT1G36441	AT1G36441
AT1G36730	AT1G36730
AT1G36970	AT1G36970
AT1G36980	AT1G36980
AT1G37120	AT1G37120
AT1G37130	NIA2
AT1G37140	MCT1
AT1G37150	HCS2
AT1G38140	AT1G38140
AT1G41830	SKS6
AT1G41875	AT1G41875
AT1G41880	RPL35AB
AT1G42420	AT1G42420
AT1G42440	AT1G42440
AT1G42450	AT1G42450
AT1G42470	AT1G42470
AT1G42480	AT1G42480
AT1G42490	AT1G42490
AT1G42540	GLR3.3
AT1G42550	PMI1
AT1G42560	MLO9
AT1G42960	AT1G42960
AT1G42970	GAPB
AT1G42990	BZIP60
AT1G43130	LCV2
AT1G43160	RAP2-6
AT1G43180	AT1G43180
AT1G43600	AT1G43600
AT1G43630	AT1G43630
AT1G43640	TULP5
AT1G43670	AT1G43670
AT1G43700	VIP1
AT1G43765	AT1G43765
AT1G43777	AT1G43777
AT1G43800	S-ACP-DES6
AT1G43850	SEU
AT1G43886	AT1G43886
AT1G43890	RABC1
AT1G43980	PCMP-E58
AT1G44000	SGRL
AT1G44020	AT1G44020
AT1G44080	AT1G44080
AT1G44100	AAP5
AT1G44110	CYCA1-1
AT1G44125	AT1G44125
AT1G44170	ALDH3H1
AT1G44350	ILL6
AT1G44414	AT1G44414
AT1G44446	CAO
AT1G44510	AT1G44510
AT1G44575	PSBS
AT1G44707	AT1G44707
AT1G44750	PUP11
AT1G44760	AT1G44760
AT1G44770	AT1G44770
AT1G44790	AT1G44790
AT1G44800	AT1G44800
[truncated: 12,385 more rows]
