# Supplementary material for: A FUS3-VAL transcriptional negative feedback circuit terminates seed maturation program and safeguards vegetative development
Source: Research Square preprint supplement (doi:10.21203/rs.3.rs-7986565/v1), 2025-11-12
Supplement: Supplementary file 4 [file 5e0836224dd8dd2d2306651f.xlsx]

## Sheet: val1val-co-up
ID	name
AT4G28520	CRC
AT4G27170	AT2S4
AT4G27160	AT2S3
AT1G03880	CRB
AT5G54740	SESA5
AT5G44120	CRA1
AT4G25140	OLEO1
AT4G27150	AT2S2
AT1G47540	ATTI7
AT2G28490	AT2G28490
AT5G40420	OLEO2
AT4G36700	AT4G36700
AT3G54940	AT3G54940
AT1G74140	AT1G74140
AT1G65090	AT1G65090
AT4G27140	AT2S1
AT1G04660	AT1G04660
AT1G04560	AT1G04560
AT2G15010	AT2G15010
AT4G26740	PXG1
AT1G54860	AT1G54860
AT3G63040	AT3G63040
AT1G54870	AT1G54870
AT5G45690	AT5G45690
AT4G31900	PKR2
AT3G56350	MSD2
AT5G22470	PARP3
AT3G51810	EM1
AT1G78500	PEN6
AT2G44470	BGLU29
AT1G75830	PDF1.1
AT3G15670	AT3G15670
AT2G34700	AT2G34700
AT2G41260	M17
AT4G35650	IDH3
AT3G17520	AT3G17520
AT1G03106	AT1G03106
AT3G21370	BGLU19
AT5G24130	AT5G24130
AT4G34520	FAE1
AT5G62800	AT5G62800
AT5G01300	AT5G01300
AT1G48470	GLN1-5
AT4G21020	AT4G21020
AT1G17810	TIP3-2
AT5G55240	PXG2
AT4G33820	AT4G33820
AT2G18540	AT2G18540
AT3G24650	ABI3
AT2G20800	NDB4
AT1G60570	AT1G60570
AT4G03050	AOP3
AT1G67100	LBD40
AT1G03890	CRD
AT2G23640	RTNLB13
AT1G73190	TIP3-1
AT1G65330	PHE1
AT3G12470	AT3G12470
AT5G08695	AT5G08695
AT1G68250	AT1G68250
AT3G12203	SCPL17
AT5G50700	HSD1
AT5G51210	OL3
AT1G77655	AT1G77655
AT5G44360	AT5G44360
AT1G27461	AT1G27461
AT2G05580	AT2G05580
AT2G42560	AT2G42560
AT1G16705	AT1G16705
AT4G31830	AT4G31830
AT5G50600	HSD1
AT1G07645	ATDSI-1VOC
AT2G21720	AT2G21720
AT1G05510	AT1G05510
AT5G38160	AT5G38160
AT2G23510	SDT
AT1G32560	AT1G32560
AT1G48990	AT1G48990
AT4G39130	AT4G39130
AT5G07190	ATS3
AT4G09600	GASA3
AT5G59310	LTP4
AT1G77950	AGL67
AT3G58450	AT3G58450
AT5G35660	AT5G35660
AT3G21380	JAL36
AT3G02480	AT3G02480
AT5G07550	GRP19
AT3G20210	dVPE
AT4G10020	HSD5
AT3G25080	AT3G25080
AT5G62490	HVA22B
AT5G45980	WOX8
AT2G27380	EPR1
AT2G36640	ATECP63
AT1G48660	AT1G48660
AT1G48800	TPS28
AT5G03820	AT5G03820
AT4G18900	AT4G18900
AT3G24250	AT3G24250
AT4G36600	AT4G36600
AT5G54000	AT5G54000
AT5G44220	AT5G44220
AT3G22640	PAP85
AT2G34870	MEE26
AT1G27990	AT1G27990
AT4G18650	AT4G18650
AT5G55410	AT5G55410
AT1G72100	AT1G72100
AT4G01985	AT4G01985
AT3G05300	AT3G05300
AT1G32710	AT1G32710
AT3G15280	AT3G15280
AT3G01570	AT3G01570
AT1G49330	AT1G49330
AT4G18330	AT4G18330
AT2G41360	AT2G41360
AT3G54530	AT3G54530
AT4G11040	AT4G11040
AT2G26010	PDF1.3
AT5G50360	AT5G50360
AT1G70260	AT1G70260
AT2G18460	LCV3
AT2G38905	AT2G38905
AT3G23060	AT3G23060
AT2G40220	ABI4
AT1G52690	AT1G52690
AT3G29385	AT3G29385
AT1G20925	AT1G20925
AT1G12805	AT1G12805
AT3G18570	AT3G18570
AT1G21860	sks7
AT3G61340	AT3G61340
AT5G04380	AT5G04380
AT2G41280	M10
AT3G57620	AT3G57620
AT4G25330	AT4G25330
AT1G28640	AT1G28640
AT5G16460	AT5G16460
AT5G04500	AT5G04500
AT1G23070	AT1G23070
AT5G21150	AGO9
AT2G33520	AT2G33520
AT2G41470	AT2G41470
AT3G28890	AtRLP43
AT3G21720	ICL
AT5G34871	AT5G34871
AT4G10850	SWEET7
AT1G65880	AAE20
AT5G53240	AT5G53240
AT3G05260	AT3G05260
AT5G44310	AT5G44310
AT5G07500	PEI1
AT2G39510	AT2G39510
AT5G24950	CYP71A15
AT2G33070	NSP2
AT1G02770	AT1G02770
AT3G53040	AT3G53040
AT5G22810	AT5G22810
AT2G21450	CHR34
AT1G12064	AT1G12064
AT5G40560	DegP13
AT5G54560	AT5G54560
AT4G22100	BGLU3
AT5G66780	AT5G66780
AT3G48270	CYP71A26
AT4G18680	AT4G18680
AT2G21490	LEA
AT5G53230	AT5G53230
AT5G52300	LTI65
AT1G48530	AT1G48530
AT5G57380	VIN3
AT5G09640	SCPL19
AT5G43000	AT5G43000
AT4G33720	AT4G33720
AT1G62290	APA2
AT5G65080	MAF5
AT2G40170	EM6
AT4G16160	OEP162
AT5G60470	IDD13
AT1G11370	PME56
AT3G25160	AT3G25160
AT5G50770	HSD6
AT3G03341	AT3G03341
AT1G25410	IPT6
AT1G68510	LBD42
AT4G28090	sks10
AT2G38920	RF178
AT2G39330	JAL23
AT5G08460	AT5G08460
AT5G41830	AT5G41830
AT5G38180	AT5G38180
AT4G16460	AT4G16460
AT5G22460	AT5G22460
AT5G60250	AT5G60250
AT3G28610	AT3G28610
AT1G03790	SOM
AT1G12070	AT1G12070
AT4G39480	CYP96A9
AT3G55240	AT3G55240
AT1G43800	S-ACP-DES6
AT5G24860	FPF1
AT1G67220	HAC2
AT4G37990	CAD8
AT3G27660	OL2
AT2G31985	AT2G31985
AT5G25180	CYP71B14
AT5G06760	LEA4-5
AT1G72570	AIL1
AT2G24255	AT2G24255
AT4G05110	ENT6
AT1G80130	AT1G80130
AT1G22100	AT1G22100
AT3G29970	AT3G29970
AT1G17010	AT1G17010
AT3G14880	AT3G14880
AT1G69880	TRX8
AT1G65340	CYP96A3
AT3G07920	AT3G07920
AT5G38170	AT5G38170
AT2G35300	LEA18
AT5G57200	AT5G57200
AT5G66430	AT5G66430
AT5G59170	AT5G59170
AT3G27250	AT3G27250
AT4G15370	BARS1
AT2G31980	CYS2
AT1G22015	B3GALT5
AT3G15605	AT3G15605
AT1G35750	APUM10
AT1G68320	MYB62
AT2G22180	AT2G22180
AT5G55750	AT5G55750
AT3G28415	ABCB22
AT4G19430	AT4G19430
AT4G14080	A6
AT5G53270	AT5G53270
AT5G55800	AT5G55800
AT3G12460	AT3G12460
AT5G09910	AT5G09910
AT3G08860	PYD4
AT5G27200	ACP5
AT5G55270	AT5G55270
AT2G21820	AT2G21820
AT4G01970	RFS4
AT1G29680	AT1G29680
AT2G20825	ULT2
AT4G15210	BAM5
AT3G03660	WOX11
AT5G07330	AT5G07330
AT1G51020	AT1G51020
AT5G10120	EIL4
AT3G44460	DPBF2
AT5G51760	AHG1
AT1G71470	AT1G71470
AT2G14247	AT2G14247
AT2G20470	AT2G20470
AT4G11310	AT4G11310
AT5G65165	SDH2-3
AT3G49300	AT3G49300
AT3G21880	COL12
AT5G18450	DREB2G
AT2G47050	AT2G47050
AT2G41225	AT2G41225
AT5G07200	GA20OX3
AT2G30770	CYP71A13
AT2G25150	SCT
AT2G26020	PDF1.2B
AT3G17010	AT3G17010
AT2G24800	PER18
AT1G80090	PV42B
AT5G47670	NFYB6
AT5G25470	AT5G25470
AT3G25280	NPF4.2
AT5G09210	AT5G09210
AT3G26940	CDG1
AT3G14040	AT3G14040
AT3G49770	AT3G49770
AT2G20430	RIC6
AT5G45830	DOG1
AT1G52695	AT1G52695
AT5G53820	AT5G53820
AT3G22500	ATECP31
AT2G38900	AT2G38900
AT2G38530	LTP2
AT5G09550	AT5G09550
AT5G05340	PER52
AT2G27940	ATL57
AT1G63070	AT1G63070
AT1G28650	AT1G28650
AT1G62410	AT1G62410
AT4G36110	AT4G36110
AT2G25340	VAMP712
AT2G26450	PME13
AT3G21860	ASK10
AT4G33070	PDC1
AT4G31615	REM2
AT1G56100	AT1G56100
AT5G03795	AT5G03795
AT1G14950	AT1G14950
AT1G64405	AT1G64405
AT2G23240	AT2G23240
AT4G33145	AT4G33145
AT1G21970	NFYB9
AT2G34315	AT2G34315
AT2G19900	NADP-ME1
AT4G39500	CYP96A11
AT2G15318	AT2G15318
AT5G57123	AT5G57123
AT1G26410	AT1G26410
AT4G18920	AT4G18920
AT1G68170	AT1G68170
AT3G58740	CSY1
AT1G14940	AT1G14940
AT3G21800	UGT71B8
AT1G71691	AT1G71691
AT3G16300	AT3G16300
AT4G28365	ENODL3
AT3G60100	CSY5
AT2G19770	PRO4
AT4G33280	REM16
AT5G42530	AT5G42530
AT1G55650	HMGB11
AT3G12410	AT3G12410
AT3G49580	LSU1
AT1G73040	JAL19
AT1G25310	MEE8
AT5G01120	AT5G01120
AT3G25810	TPS24
AT4G12210	AT4G12210
AT5G41765	AT5G41765
AT2G21260	AT2G21260
AT1G60090	BGLU4
AT3G11740	AT3G11740
AT1G19460	AT1G19460
AT5G06500	AGL96
AT1G30920	AT1G30920
AT3G54450	NPF5.4
AT2G05330	AT2G05330
AT3G13130	AT3G13130
AT3G28857	PRE5
AT1G48130	PER1
AT1G14930	AT1G14930
AT5G55150	AT5G55150
AT2G37670	AT2G37670
AT3G07620	AT3G07620
AT3G47710	PRE4
AT4G14780	AT4G14780
AT3G25905	CLE27
AT3G27415	AT3G27415
AT5G45880	AT5G45880
AT3G62610	ATMYB11
AT2G47520	ERF071
AT2G23220	CYP81D6
AT1G06350	AT1G06350
AT2G23230	TPS05
AT4G27550	TPS4
AT5G66830	AT5G66830
AT2G28420	AT2G28420
AT4G12960	GILT
AT3G12960	AT3G12960
AT2G18340	AT2G18340
AT1G18100	MFT
AT5G09570	AT5G09570
AT4G11340	AT4G11340
AT4G22105	SCRL26
AT3G50980	XERO1
AT5G58460	CHX25
AT5G66980	AT5G66980
AT1G23730	BCA3
AT4G25010	SWEET14
AT1G13610	AT1G13610
AT5G63085	AT5G63085
AT5G61620	AT5G61620
AT4G29550	AT4G29550
AT5G37300	WSD1
AT1G75300	AT1G75300
AT4G28420	AT4G28420
AT5G07510	GRP14
AT5G44440	AT5G44440
AT3G01600	anac044
AT2G47780	AT2G47780
AT3G29260	SDR5
AT2G47770	TSPO
AT1G62710	bVPE
AT5G07530	GRP17
AT3G26790	FUS3
AT2G04070	DTXL2
AT3G50090	SDN4
AT5G35600	HDA7
AT4G14165	AT4G14165
AT3G49570	LSU3
AT4G10270	AT4G10270
AT5G09360	LAC14
AT1G78360	GSTU21
AT4G00416	MBD3
AT1G24580	AT1G24580
AT4G12500	AT4G12500
AT1G61800	GPT2
AT4G26466	LRE
AT2G39820	EIF6-1
AT1G05310	PME8
AT4G29850	AT4G29850
AT4G12470	AZI1
AT5G59320	LTP3
AT2G42990	AT2G42990
AT5G20310	AT5G20310
AT5G19880	PER58
AT3G57510	ADPG1
AT3G54510	AT3G54510
AT2G47120	SDR3C
AT2G01770	VIT1
AT2G02990	RNS1
AT1G07540	TRP5
AT5G24240	PI4KG3
AT4G26460	AT4G26460
AT5G05020	AT5G05020
AT5G24560	PP2B12
AT3G19920	AT3G19920
AT4G22960	AT4G22960
AT3G60730	PME36
AT1G20860	PHT1-8
AT1G75290	AT1G75290
AT4G08868	AT4G08868
AT1G13370	AT1G13370
AT5G39890	PCO2
AT3G22490	AT3G22490
AT3G10780	AT3G10780
AT3G15830	AT3G15830
AT3G58210	AT3G58210
AT1G73560	AT1G73560
AT5G39520	AT5G39520
AT3G02810	AT3G02810
AT3G23970	AT3G23970
AT3G44830	PDAT2
AT1G49860	GSTF14
AT4G16540	AT4G16540
AT4G13985	FBD1
AT5G24640	AT5G24640
AT4G05380	AT4G05380
AT4G32810	CCD8
AT4G30180	AT4G30180
AT4G33467	AT4G33467
AT5G63350	AT5G63350
AT4G02690	AT4G02690
AT4G21490	NDB3
AT1G74990	AT1G74990
AT5G61610	AT5G61610
AT5G05390	LAC12
AT2G36660	PAB7
AT3G03230	AT3G03230
AT5G20100	AT5G20100
AT1G24735	AT1G24735
AT4G32490	ENODL4
AT5G43770	AT5G43770
AT5G14490	anac085
AT3G52780	PAP20
AT3G48620	AT3G48620
AT1G71160	KCS7
AT5G07260	AT5G07260
AT1G63210	AT1G63210
AT1G47980	AT1G47980
AT4G02700	SULTR3
AT5G44420	PDF1.2A
AT3G12820	AtMYB10
AT3G03670	PER28
AT5G53660	GRF7
AT5G50260	CEP1
AT5G02780	GSTL1
AT1G73220	45566
AT5G16700	AT5G16700
AT1G06990	AT1G06990
AT2G35070	AT2G35070
AT1G25270	AT1G25270
AT1G60970	AT1G60970
AT5G07480	KUOX1
AT1G63340	AT1G63340
AT1G74000	SSL11
AT3G11260	WOX5
AT5G12910	AT5G12910
AT4G12890	AT4G12890
AT5G52500	AT5G52500
AT1G13620	RGF2
AT5G41280	CRRSP57
AT5G44630	BS
AT3G03620	AT3G03620
AT1G51010	AT1G51010
AT1G26590	AT1G26590
AT1G15150	AT1G15150
AT4G17980	anac071
AT5G66970	AT5G66970
AT1G28030	AT1G28030
AT5G45180	FMO2
AT4G09610	GASA2
AT2G29090	CYP707A2
AT3G19940	STP10
AT1G29100	AT1G29100
AT1G44050	AT1G44050
AT3G50330	HEC2
AT3G20470	GRP-5
AT5G02390	AT5G02390
AT5G05220	AT5G05220
AT1G67750	AT1G67750
AT1G62500	AT1G62500
AT2G38340	DREB2E
AT3G19230	AT3G19230
AT5G58610	AT5G58610
AT2G01422	AT2G01422
AT1G52120	JAL12
AT4G32500	AKT5
AT4G04760	AT4G04760
AT5G52160	AT5G52160
AT2G26130	AT2G26130
AT3G18250	AT3G18250
AT4G18990	XTH29
AT5G11320	YUC4
AT5G18320	PUB46
AT4G00380	FDM2
AT1G77120	ADH1
AT2G29380	HAI3
AT2G32670	VAMP725
AT3G05150	AT3G05150
AT3G54520	AT3G54520
AT5G54550	AT5G54550
AT4G36280	AT4G36280
AT1G70440	SRO3
AT5G41761	AT5G41761
AT1G23965	AT1G23965
AT1G06080	ADS1
AT1G22250	AT1G22250
AT3G28500	RPP2C
AT1G22090	EMB2204
AT1G56600	GOLS2
AT2G14520	CBSDUF3
AT1G21320	AT1G21320
AT4G19380	FAO4A
AT5G61412	AT5G61412
AT5G53870	ENODL1
AT1G23700	AT1G23700
AT1G20750	AT1G20750
AT1G10680	ABCB10
AT4G24030	AT4G24030
AT3G50990	PER36
AT5G27060	AtRLP53
AT3G61035	AT3G61035
AT3G51200	AT3G51200
AT1G22150	SULTR1
AT5G17220	GSTF12
AT4G30880	AT4G30880
AT5G38900	AT5G38900
AT5G10140	FLC
AT5G02760	AT5G02760
AT1G78030	AT1G78030
AT1G11572	AT1G11572
AT5G03860	MLS
AT1G71380	CEL3
AT3G15720	AT3G15720
AT5G38195	AT5G38195
AT1G66770	SWEET6
AT4G12490	AT4G12490
AT4G18620	PYL13
AT1G77100	PER13
AT1G30220	INT2
AT4G29570	CDA8
AT4G22090	AT4G22090
AT2G32830	PHT1-5
AT1G11230	AT1G11230
AT5G56300	GAMT2
AT4G29548	AT4G29548
AT5G56510	APUM12
AT4G33560	AT4G33560
AT1G57800	ORTH3
AT5G53700	AT5G53700
AT3G23460	AT3G23460
AT5G17780	AT5G17780
AT5G61630	AT5G61630
AT5G02210	AT5G02210
AT4G25420	GA20OX1
AT4G05030	AT4G05030
AT2G04050	DTXL1
AT5G17810	WOX12
AT5G62400	AT5G62400
AT4G32510	BOR7
AT1G53490	HEI10
AT1G58330	ZW2
AT5G27630	ACBP5
AT5G41460	AT5G41460
AT5G05040	AT5G05040
AT2G21640	AT2G21640
AT4G39210	APL3
AT1G30740	AT1G30740
AT2G30750	CYP71A12
AT2G44460	BGLU28
AT1G67770	TEL2
AT5G57390	AIL5
AT1G08090	NRT2.1
AT4G33870	PER48
AT4G27530	AT4G27530
AT3G45860	CRK4
AT4G15396	CYP702A6
AT1G62262	SLAH4
AT5G09540	AT5G09540
AT5G61890	ERF114
AT5G48130	AT5G48130
AT2G37370	AT2G37370
AT5G65320	BHLH99
AT1G24270	AT1G24270
AT1G23160	AT1G23160
AT5G57760	AT5G57760
AT1G04880	HMGB15
AT3G21500	DXPS1
AT3G19700	IKU2
AT5G09970	CYP78A7
AT3G51410	AT3G51410
AT5G24660	LSU2
AT3G50610	AT3G50610
AT5G24080	AT5G24080
AT1G26390	AT1G26390
AT5G17970	AT5G17970
AT1G31510	AT1G31510
AT4G16162	AT4G16162
AT2G40790	CXXS2
AT5G44940	AT5G44940
AT4G28700	AMT1-4
AT5G55370	AT2
AT5G66150	AT5G66150
AT4G24000	CSLG2
AT4G27590	AT4G27590
AT1G01680	PUB54
AT1G49475	AT1G49475
AT3G11165	AT3G11165
AT5G07600	AT5G07600
AT1G12130	AT1G12130
AT3G16175	AT3G16175
AT5G65510	AIL7
AT1G23201	AT1G23201
AT1G24010	AT1G24010
AT1G27860	AT1G27860
AT3G11325	AT3G11325
AT5G51850	AT5G51850
AT2G16060	AHB1
AT3G14950	TTL2
AT2G41230	ORS1
AT5G26805	AT5G26805
AT3G17130	AT3G17130
AT5G42830	AT5G42830
AT5G23810	AAP7
AT5G22580	AT5G22580
AT4G29305	LCR25
AT3G28510	AT3G28510
AT5G07560	GRP20
AT2G42000	AT2G42000
AT5G55770	AT5G55770
AT5G20790	AT5G20790
AT5G42280	AT5G42280
AT3G48770	AT3G48770
AT5G55250	IAMT1
AT5G13170	SWEET15
AT5G07310	ERF115
AT4G25100	FSD1
AT3G58060	MTPC3
AT4G25850	ORP4B
AT1G76960	AT1G76960
AT4G27480	AT4G27480
AT5G10000	FD4
AT3G53232	RTFL1
AT1G16770	AT1G16770
AT5G22555	AT5G22555
AT1G19960	AT1G19960
AT4G36430	PER49
AT1G01305	AT1G01305
AT4G23680	AT4G23680
AT2G18590	AT2G18590
AT3G44290	NAC60
AT4G16240	AT4G16240
AT3G11210	CPRD49
AT1G17020	SRG1
AT5G65100	EIL5
AT1G08650	PPCK1
AT3G14300	PME26
AT1G35910	TPPD
AT5G28810	AT5G28810
AT2G23960	AT2G23960
AT2G25470	AtRLP21
AT1G53080	AT1G53080
AT3G43190	SUS4
AT3G18715	IDL4
AT5G64530	ANAC104
AT2G13900	AT2G13900
AT1G26400	AT1G26400
AT2G43860	AT2G43860
AT1G76470	AT1G76470
AT4G19810	AT4G19810
AT5G42800	DFRA
AT1G53070	AT1G53070
AT5G57260	CYP71B10
AT4G13210	AT4G13210
AT2G33460	RIC1
AT5G10220	ANN6
AT5G30500	GOLS10
AT3G61660	AT3G61660
AT3G16900	AT3G16900
AT3G57950	AT3G57950
AT3G23950	AT3G23950
AT3G09400	PLL3
AT1G71890	SUC5
AT1G07430	AIP1
AT5G55490	GEX1
AT2G14692	AT2G14692
AT2G31180	ATMYB14
AT4G14980	AT4G14980
AT2G17850	STR17
AT1G21360	GLTP2
AT3G07540	FH10
AT2G33690	AT2G33690
AT5G66985	AT5G66985
AT5G63580	FLS2
AT1G54530	AT1G54530
AT1G22600	AT1G22600
AT4G02780	GA1
AT1G09370	AT1G09370
AT2G32487	AT2G32487
AT5G35375	AT5G35375
AT1G15580	IAA5
AT3G26010	AT3G26010
AT5G63750	ARI13
AT3G08870	LECRK61
AT3G27410	AT3G27410
AT5G03090	AT5G03090
AT2G47010	AT2G47010
AT2G36210	AT2G36210
AT1G05420	OFP12
AT5G05770	WOX7
AT5G64080	AT5G64080
AT5G47330	AT5G47330
AT5G11930	GRXC10
AT5G58660	AT5G58660
AT1G16760	AT1G16760
AT2G27240	ALMT7
AT4G37390	YDK1
AT5G11100	SYT4
AT4G08910	AT4G08910
AT5G64550	AT5G64550
AT2G36325	AT2G36325
AT1G52040	MBP1
AT5G49330	MYB111
AT1G05490	CLSY3
AT5G10040	AT5G10040
AT2G02120	PDF2.1
AT5G14340	AtMYB40
AT3G05630	PLDP2
AT1G30660	T5I8.11
AT5G13790	AGL15
AT4G10265	AT4G10265
AT5G15120	PCO1
AT1G59790	AT1G59790
AT5G14860	AT5G14860
AT5G64210	AOX2
AT4G11650	OSM34
AT1G66360	AT1G66360
AT1G55050	AT1G55050
AT4G27190	AT4G27190
AT3G59220	PRN1
AT4G29150	IQD25
AT1G62530	AT1G62530
AT1G11785	AT1G11785
AT3G47190	AT3G47190
AT4G21366	AT4G21366
AT1G26240	AT1G26240
AT3G58410	AT3G58410
AT1G60110	JAL17
AT1G08170	AT1G08170
AT3G14320	ATL61
AT1G29195	AT1G29195
AT4G39610	AT4G39610
AT5G17800	AtMYB56
AT1G75600	AT1G75600
AT2G46880	PAP14
AT5G44700	GSO2
AT3G48300	CYP71A23
AT3G21890	AT3G21890
AT2G42430	LBD16
AT2G43660	AT2G43660
AT2G42800	AtRLP29
AT5G33390	AT5G33390
AT4G17670	AT4G17670
AT1G02450	NIMIN-1
AT3G53690	AT3G53690
AT2G16890	UGT90A1
AT2G18193	AT2G18193
AT5G50800	SWEET13
AT3G52270	AT3G52270
AT3G50940	AT3G50940
AT5G22930	AT5G22930
AT4G02160	AT4G02160
AT1G24000	AT1G24000
AT3G50440	ATMES10
AT4G33040	GRXC6
AT5G09470	PUMP6
AT1G20180	AT1G20180
AT5G24280	GMI1
AT3G50890	ZHD7
AT5G39720	AIG2L
AT3G57240	BG3
AT2G19320	AT2G19320
AT1G16850	AT1G16850
AT5G20810	AT5G20810
AT1G26560	BGLU40
AT1G17710	AT1G17710
AT2G42660	AT2G42660
AT3G20180	AT3G20180
AT1G54160	NFYA5
AT2G32790	AT2G32790
AT4G26950	AT4G26950
AT5G59220	HAI1
AT5G51810	GA20OX2
AT1G61255	AT1G61255
AT2G23170	GH3.3
AT5G48850	SDI1
AT3G27480	AT3G27480
AT1G64110	AT1G64110
AT1G13430	STO9
AT3G58270	AT3G58270
AT5G45990	AT5G45990
AT3G48850	MPT2
AT1G77960	AT1G77960
AT2G26870	NPC2
AT1G04645	AT1G04645
AT4G15390	AT4G15390
AT3G15370	EXPA12
AT1G04778	AT1G04778
AT2G18190	AT2G18190
AT2G43000	JUB1
AT4G16260	AT4G16260
AT3G04181	AT3G04181
AT4G16620	AT4G16620
AT2G40200	BHLH51
AT5G25550	LRX7
AT2G40030	NRPE1
AT3G22550	AT3G22550
AT1G23110	AT1G23110
AT3G19500	BHLH113
AT3G10200	AT3G10200
AT1G22110	AT1G22110
AT2G28610	WOX3
AT4G23720	AT4G23720
AT4G22110	AT4G22110
AT5G03495	AT5G03495
AT1G71690	AT1G71690
AT1G48100	AT1G48100
AT2G25510	AT2G25510
AT3G58400	AT3G58400
AT5G65070	MAF4
AT4G09530	AT4G09530
AT2G44910	ATHB-4
AT4G14723	EPFL4
AT1G18835	MIF3
AT4G23600	CORI3
AT5G45850	AT5G45850
AT2G44800	AT2G44800
AT5G24105	AGP41
AT1G65890	AAE12
AT1G78760	AT1G78760
AT2G01960	TET14
AT2G45135	AT2G45135
AT3G47420	ATPS3
AT2G27250	CLV3
AT3G14360	AT3G14360
AT1G53690	NRPB12L
AT1G67290	AT1G67290
AT3G21351	AT3G21351
AT5G57240	ORP4C
AT3G50030	AT3G50030
AT3G21352	AT3G21352
AT1G09812	AT1G09812
AT4G24070	AT4G24070
AT5G03668	AT5G03668
AT5G66690	UGT72E2
AT2G02660	AT2G02660
AT4G27250	AT4G27250
AT3G03530	NPC4
AT3G02310	45537
AT1G62580	AT1G62580
AT1G12200	AT1G12200
AT2G25130	AT2G25130
AT1G04600	XI-A
AT3G23290	LSH4
AT5G07490	AT5G07490
AT5G62850	SWEET5
AT3G13650	DIR7
AT1G12890	ERF088
AT1G47760	AGL102
AT2G01610	AT2G01610
AT2G33175	AT2G33175
AT1G19830	AT1G19830
AT1G57650	AT1G57650
AT1G30050	AT1G30050
AT4G25530	HDG6
AT1G48000	MYB112
AT4G13700	ATPAP23
AT5G57735	TASIR-ARF
AT1G52110	AT1G52110
AT3G45130	LAS1
AT4G22233	AT4G22233
AT1G49005	CLE11
AT3G10880	AT3G10880
AT3G07120	AT3G07120
AT2G26400	ARD1
AT5G57785	AT5G57785
AT4G18250	AT4G18250
AT2G19990	PR-1-LIKE
AT1G66390	MYB90
AT4G12480	EARLI1
AT1G11170	AT1G11170
AT1G46480	WOX4
AT1G24620	CML25
AT2G46990	IAA20
AT2G41690	HSFB3
AT5G66580	AT5G66580
AT2G41810	AT2G41810
AT3G27400	AT3G27400
AT2G21770	CESA9
AT1G17745	PGDH2
AT3G05720	IMPA7
AT5G66260	AT5G66260
AT3G61118	AT3G61118
AT1G09155	PP2B15
AT1G22210	TPPC
AT1G02040	AT1G02040
AT5G13250	AT5G13250
AT4G32460	AT4G32460
AT5G49180	PME58
AT2G45870	AT2G45870
AT5G11410	AT5G11410
AT4G14390	AT4G14390
AT2G21780	AT2G21780
AT1G55440	AT1G55440
AT1G18410	AT1G18410
AT1G22900	DIR11
AT1G10010	AAP8
AT1G23970	AT1G23970
AT5G39850	RPS9C
AT3G13784	AtcwINV5
AT3G58780	AGL1
AT3G09190	AT3G09190
AT4G25930	AT4G25930
AT5G14650	AT5G14650
AT1G08180	SMR2
AT5G45580	AT5G45580
AT2G29950	EFL1
AT3G21000	AT3G21000
AT1G07985	AT1G07985
AT2G19590	ACO1
AT1G66235	AT1G66235
AT1G19840	AT1G19840
AT1G24470	KCR2
AT5G05290	EXPA2
AT1G27040	NPF4.5
AT1G33030	AT1G33030
AT2G45360	AT2G45360
AT1G55265	AT1G55265
AT1G69490	NAC029
AT2G17845	AT2G17845
AT2G45290	TKL-2
AT1G33960	AIG1
AT1G06330	AT1G06330
AT1G72830	NFYA3
AT3G30460	AT3G30460
AT1G18180	AT1G18180
AT4G25250	AT4G25250
AT3G19530	AT3G19530
AT4G18660	AT4G18660
AT2G39885	MIR393A
AT2G29370	AT2G29370
AT1G16635	AT1G16635
AT2G15780	AT2G15780
AT2G43480	PER26
AT1G30530	UGT78D1
AT4G15393	CYP702A5
AT5G20420	CLSY2
AT3G02410	ICMEL2
AT3G27440	UKL5
AT3G42670	CLSY1
AT1G29090	AT1G29090
AT1G21850	sks8
AT5G06250	AT5G06250
AT2G32460	MYB101
AT4G27810	AT4G27810
AT4G14695	MPC2
AT2G43590	AT2G43590
AT4G22880	LDOX
AT2G33020	AtRLP24
AT1G12600	UTR4
AT2G15400	NRPD3B
AT1G26233	SNOR95
AT2G39700	EXPA4
AT1G59930	AT1G59930
AT1G68470	AT1G68470
AT2G38823	AT2G38823
AT1G36180	ACC2
AT1G23040	AT1G23040
AT3G04530	PPCK2
AT3G29590	5MAT
AT1G10385	EXO84A
AT1G51000	AT1G51000
AT1G23120	AT1G23120
AT5G51310	AT5G51310
AT2G42720	AT2G42720
AT5G55650	AT5G55650
AT3G14020	NFYA6
AT2G32160	AT2G32160
AT2G41850	ADPG2
AT1G59660	NUP98B
AT4G21500	AT4G21500
AT1G27890	CAF1-4
AT4G19590	AT4G19590
AT5G15950	SAMDC2
AT1G30100	NCED5
AT3G44450	AT3G44450
AT3G50160	AT3G50160
AT5G24330	ATXR6
AT5G11440	CID5
AT4G04745	AT4G04745
AT3G22560	AT3G22560
AT2G02850	ARPN
AT3G07730	AT3G07730
AT4G38620	MYB4
AT1G22990	HIPP22
AT2G43960	AT2G43960
AT3G48510	AT3G48510
AT3G17790	PAP17
AT4G01930	AT4G01930
AT5G26890	AT5G26890
AT3G14395	AT3G14395
AT3G27025	AT3G27025
AT5G09290	SAL4
AT5G63990	SAL3
AT1G07485	AT1G07485
AT3G61820	AT3G61820
AT5G47130	AT5G47130
AT2G26440	PME12
AT5G17090	AT5G17090
AT2G44590	DRP1D
AT2G43470	AT2G43470
AT5G25190	ERF003
AT1G67481	MIR839A
AT2G34850	MEE25
AT1G55230	AT1G55230
AT3G58200	AT3G58200
AT5G65230	AtMYB53
AT2G43870	AT2G43870
AT3G53370	S1FA1
AT5G63240	AT5G63240
AT2G40100	LHCB4.3
AT5G24655	LSU4
AT3G49620	DIN11
AT1G04920	SPS3
AT1G56170	NFYC2
AT1G10370	GSTU17
AT2G43270	AT2G43270
AT1G70840	MLP31
AT5G51440	HSP23.5
AT4G00210	LBD31
AT5G51950	AT5G51950
AT2G25000	WRKY60
AT3G60140	BGLU30
AT1G68765	IDA
AT4G29240	AT4G29240
AT4G28530	anac074
AT5G06720	PER53
AT5G18560	ERF086
AT1G19115	AT1G19115
AT5G65640	BHLH93
AT1G32570	AT1G32570
AT2G45780	AT2G45780
AT5G38790	AT5G38790
AT2G02380	GSTZ2
AT2G18150	PER15
AT2G03520	UPS4
AT4G23150	CRK7
AT2G41090	CML10
AT2G19660	AT2G19660
AT4G03965	AT4G03965
AT5G60460	AT5G60460
AT5G55620	AT5G55620
AT1G68240	BHLH109
AT3G06360	AGP27
AT3G44770	AT3G44770
AT5G66562	AT5G66562
AT1G25530	AT1G25530
AT2G45900	AT2G45900
AT1G01670	PUB56
AT4G16820	PLA-I{beta]2
AT1G32860	AT1G32860
AT5G42780	ZHD13
AT5G49690	UGT91C1
AT1G72620	AT1G72620
AT3G47380	AT3G47380
AT5G65170	AT5G65170
AT2G41070	DPBF4
AT5G54020	AT5G54020
AT4G34860	INVB
AT2G44390	AT2G44390
AT5G52390	AT5G52390
AT5G14690	AT5G14690
AT5G46540	ABCB7
AT1G52400	BGLU18
AT3G28155	AT3G28155
AT3G60650	AT3G60650
AT4G21380	SD18
AT5G43860	CLH2
AT1G21310	EXT3
AT1G17960	AT1G17960
AT3G57380	AT3G57380
AT5G22500	FAR1
AT3G61900	AT3G61900
AT1G66870	AT1G66870
AT1G69630	FBL13
AT3G60540	AT3G60540
AT1G50110	BCAT6
AT5G20150	SPX1
AT4G13990	AT4G13990
AT2G39350	ABCG1
AT1G70510	KNAT2
AT1G26770	EXPA10
AT3G11180	AT3G11180
AT1G24095	AT1G24095
AT4G18350	NCED2
AT1G28390	AT1G28390
AT2G21930	AT2G21930
AT2G28790	AT2G28790
AT4G24415	MIR824A
AT1G17180	GSTU25
AT3G28570	AT3G28570
AT1G14630	AT1G14630
AT5G62210	AT5G62210
AT2G36500	CBSCBSPB2
AT3G05980	AT3G05980
AT1G02700	AT1G02700
AT1G48580	AT1G48580
AT5G66990	RKD3
AT4G28720	YUC8
AT4G35640	SAT4
AT5G59340	WOX2
AT3G24780	AT3G24780
AT3G27910	AT3G27910
AT2G16580	AT2G16580
AT5G60220	TET4
AT1G02790	PGA3
AT3G58150	AT3G58150
AT5G45730	AT5G45730
AT1G75280	AT1G75280
AT2G37290	AT2G37290
AT2G39490	AT2G39490
AT4G09940	AT4G09940
AT5G41610	CHX18
AT1G54575	AT1G54575
AT5G24910	CYP714A1
AT5G38197	AT5G38197
AT1G51470	TGG5
AT3G05152	AT3G05152
AT3G28360	ABCB16
AT4G28556	RIC7
AT3G50230	AT3G50230
AT3G18750	WNK6
AT1G30515	AT1G30515
AT4G25110	AMC2
AT4G10350	BRN2
AT3G02610	S-ACP-DES2
AT1G51530	AT1G51530
AT1G26680	REM17
AT5G63250	AT5G63250
AT1G16640	AT1G16640
AT2G34185	AT2G34185
AT3G04380	SUVR4
AT5G42235	AT5G42235
AT3G28150	AXY4L
AT1G35290	AT1G35290
AT3G25260	NPF4.1
AT3G61680	AT3G61680
AT1G67105	AT1G67105
AT1G59920	AT1G59920
AT5G05180	AT5G05180
AT1G02970	WEE1
AT4G12735	AT4G12735
AT2G37810	AT2G37810
AT2G38940	PHT1-4
AT1G77110	PIN6
AT4G31970	CYP82C2
AT1G71002	MIR858A
AT2G31420	AT2G31420
AT5G16023	RTFL18
AT1G29860	WRKY71
AT1G28080	AT1G28080
AT2G35550	BPC7
AT1G62360	STM
AT1G62620	AT1G62620
AT3G61898	AT3G61898
AT3G61930	AT3G61930
AT1G23750	AT1G23750
AT3G21560	UGT84A2
AT1G68795	CLE12
AT5G47060	AT5G47060
AT4G03270	CYCD6-1
AT2G24010	scpl23
AT1G47510	AT5PTASE11
AT2G45210	SAUR36
AT5G17430	BBM
AT5G04010	NSFBX
AT1G55030	AT1G55030
AT1G55740	RFS1
AT5G46230	AT5G46230
AT1G78840	AT1G78840
AT5G44210	ERF9
AT5G66630	DAR5
AT3G21090	ABCG15
AT4G01920	AT4G01920
AT3G58930	AT3G58930
AT1G74650	ATY13
AT4G25980	PER43
AT3G54420	ATEP3
AT5G64060	anac103
AT2G25270	AT2G25270
AT2G15128	AT2G15128
AT4G17380	MSH4
AT2G26310	FAP2
AT3G08040	FRD3
AT5G16235	AT5G16235
AT2G22810	ACS4
AT4G10490	AT4G10490
AT1G07270	CDC6B
AT1G54840	IDM2
AT1G79915	AT1G79915
AT5G40620	AT5G40620
AT2G30580	DRIP2
AT4G28130	DGK6
AT3G17820	GLN1-3
AT3G52630	RPA3A
AT1G53708	RTFL9
AT5G20440	MOB2A
AT2G19970	AT2G19970
AT3G05740	RECQL1
AT1G51035	AT1G51035
AT1G17310	AT1G17310
AT1G02940	GSTF5
AT3G62100	IAA30
AT4G32290	AT4G32290
AT2G33130	RALFL18
AT5G54300	AT5G54300
AT3G47400	PME33
AT5G25475	AT5G25475
AT4G03450	AT4G03450
AT5G20710	BGAL7
AT4G22235	AT4G22235
AT1G26380	AT1G26380
AT3G03240	AT3G03240
AT5G53420	AT5G53420
AT1G32900	GBSS1
AT3G16150	AT3G16150
AT4G21960	PER42
AT5G02510	AT5G02510
AT4G12870	AT4G12870
AT4G15910	ATDI21
AT1G34060	TAR4
AT4G37360	CYP81D2
AT1G61440	AT1G61440
AT1G01480	ACS2
AT2G47680	AT2G47680
AT1G34392	AT1G34392
AT1G08440	ALMT2
AT4G15270	AT4G15270
AT4G11350	AT4G11350
AT4G24026	AT4G24026
AT2G18420	GASA11
AT5G07420	PME49
AT1G10530	AT1G10530
AT5G22300	NIT4
AT1G25425	CLE43
AT5G64120	PER71
AT1G15840	AT1G15840
AT5G44306	AT5G44306
AT3G04050	AT3G04050
AT1G23140	AT1G23140
AT5G44980	AT5G44980
AT3G45093	AT3G45093
AT1G01250	ERF023
AT3G24340	CLSY4
AT5G54130	AT5G54130
AT1G54280	ALA6
AT2G35140	AT2G35140
AT5G55950	AT5G55950
AT1G60890	PIP5K8
AT1G24530	AT1G24530
AT1G78206	MIR775A
AT5G02580	AT5G02580
AT5G67160	EPS1
AT5G63087	AT5G63087
AT4G23320	CRK24
AT1G73620	AT1G73620
AT3G18280	AT3G18280
AT1G30170	AT1G30170
AT4G22730	AT4G22730
AT5G04120	IPSP
AT3G01516	AT3G01516
AT4G15710	AT4G15710
AT3G16980	NRPB9A
AT4G28560	RIC7
AT1G18940	AT1G18940
AT5G40570	AT5G40570
AT1G79180	ATMYB63
AT5G16230	S-ACP-DES3
AT1G10520	AT1G10520
AT5G49500	SRP-54B
AT5G18910	AT5G18910
AT3G16800	AT3G16800
AT1G32880	AT1G32880
AT2G18060	NAC037
AT1G47990	GA2OX4
AT1G20795	AT1G20795
AT1G62840	AT1G62840
AT1G32870	NAC13
AT5G01790	AT5G01790
AT2G14900	GASA7
AT5G40316	AT5G40316
AT4G35590	RKD5
AT1G07175	AT1G07175
AT1G61930	AT1G61930
AT5G15490	UGD3
AT4G13680	AT4G13680
AT5G46050	NPF5.2
AT2G32960	AT2G32960
AT5G27360	SFP2
AT4G39700	AT4G39700
AT2G22821	AT2G22821
AT3G25790	AT3G25790
AT2G38860	DJ1E
AT5G25490	AT5G25490
AT3G23870	AT3G23870
AT1G77920	TGA7
AT2G36970	UGT86A1
AT5G39220	AT5G39220
AT2G40470	LBD15
AT1G16490	ATMYB58
AT2G41190	AT2G41190
AT5G61490	AT5G61490
AT1G76930	ATEXT4
AT5G49190	SUS2
AT1G56555	AT1G56555
AT3G42725	AT3G42725
AT3G54820	PIP2-5
AT5G18750	AT5G18750
AT1G29050	TBL38
AT5G66270	AT5G66270
AT1G74088	AT1G74088
AT5G01660	AT5G01660
AT4G21326	ATSBT3.12
AT2G27990	BLH8
AT5G06190	AT5G06190
AT3G52770	ZPR3
AT1G60630	AT1G60630
AT3G53190	AT3G53190
AT1G53700	WAG1
AT1G49830	AT1G49830
AT3G59140	ABCC10
AT1G29980	AT1G29980
AT5G12330	LRP1
AT3G29300	AT3G29300
AT4G36270	AT4G36270
AT2G30690	MYOB4
AT3G04040	AT3G04040
AT5G26310	UGT72E3
AT5G23530	CXE18
AT1G23550	SRO2
AT2G22426	AT2G22426
AT3G44350	NAC061
AT5G25820	AT5G25820
AT4G34630	AT4G34630
AT3G12500	CHI-B
AT2G36695	AT2G36695
AT1G66960	LUP5
AT1G59670	GSTU15
AT4G31320	AT4G31320
AT1G14390	AT1G14390
AT5G63650	SRK2H
AT4G28790	BHLH23
AT3G24450	AT3G24450
AT2G40435	AT2G40435
AT5G57920	ENODL10
AT5G51490	PME59
AT5G51500	PME60
AT5G39100	GLP6
AT2G32280	AT2G32280
AT5G48950	DHNAT2
AT3G26480	AT3G26480
AT5G10440	CYCD4-2
AT3G03770	AT3G03770
AT3G04720	HEL
AT2G27040	AGO4
AT1G59950	AT1G59950
AT3G03440	AT3G03440
AT1G63020	NRPD1
AT3G21805	AT3G21805
AT3G55485	AT3G55485
AT1G06980	AT1G06980
AT5G67200	AT5G67200
AT1G78320	GSTU23
AT5G13330	ERF113
AT1G79360	45567
AT3G15270	SPL5
AT2G46950	CYP709B2
AT1G35320	AT1G35320
AT1G55120	CWINV3
AT5G10770	AT5G10770
AT5G49560	AT5G49560
AT3G29140	AT3G29140
AT2G41730	AT2G41730
AT3G28560	AT3G28560
AT3G18630	ATUNG
AT5G14760	AO
AT5G55360	AT3
AT2G23110	AT2G23110
AT2G35810	AT2G35810
AT1G26420	AT1G26420
AT5G39240	AT5G39240
AT2G47750	GH3.9
AT3G03260	HDG8
AT5G02360	AT5G02360
AT4G02330	PME41
AT5G11870	AT5G11870
AT4G27900	AT4G27900
AT3G13960	GRF5
AT4G24265	AT4G24265
AT5G46720	AT5G46720
AT2G41340	NRPD5B
AT1G52100	AT1G52100
AT1G01810	AT1G01810
AT2G15020	AT2G15020
AT1G07410	RABA2B
AT5G13990	ATEXO70C2
AT1G80960	AT1G80960
AT5G63070	RPS15F
AT2G29350	SAG13
AT3G56870	AT3G56870
AT3G51030	TRX1
AT5G03670	AT5G03670
AT5G56990	AT5G56990
AT2G41510	CKX1
AT4G27510	AT4G27510
AT3G17280	AT3G17280
AT4G27970	SLAH2
AT4G12540	AT4G12540
AT5G52720	AT5G52720
AT4G24080	ALL1
AT1G68460	IPT1
AT5G60760	AT5G60760
AT3G16990	TENA_E
AT3G24225	CLE19
AT2G25940	ALPHA-VPE
AT5G64780	AT5G64780
AT1G09960	SUC4
AT1G02520	ABCB11
AT4G35840	NIP1
AT1G52800	AT1G52800
AT1G54020	AT1G54020
AT5G63700	AT5G63700
AT4G34320	AT4G34320
AT2G22240	IPS2
AT5G10570	BHLH61
AT2G47230	DUF6
AT4G32890	GATA9
AT3G48346	AT3G48346
AT3G03460	AT3G03460
AT5G13130	AT5G13130
AT5G48670	AGL80
AT1G65481	AT1G65481
AT1G35720	ANN1
AT5G16980	AT5G16980
AT4G32870	AT4G32870
AT1G04770	AT1G04770
AT2G35160	SUVH5
AT5G28020	CYSD2
AT4G15620	AT4G15620
AT5G43030	AT5G43030
AT2G47260	WRKY23
AT1G24575	AT1G24575
AT1G46264	HSFB4
AT3G16490	IQD26
AT5G62230	ERL1
AT5G20635	GG3
AT3G60660	AT3G60660
AT4G17260	AT4G17260
AT1G18250	ATLP-1
AT4G03320	TIC20-IV
AT5G52600	MYB82
AT1G11125	AT1G11125
AT1G11840	ATGLX1
AT4G36220	CYP84A1
AT5G24205	AT5G24205
AT5G18290	SIP1-2
AT1G07380	AT1G07380
AT1G64100	AT1G64100
AT5G54060	A3G2XYLT
AT1G78390	NCED9
AT1G11740	AT1G11740
AT3G18090	NRPD2B
AT4G02360	AT4G02360
AT1G74030	ENO1
AT4G37295	AT4G37295
AT1G13330	HOP2
AT1G49110	AT1G49110
AT1G59640	BPE
AT3G10190	CML36
AT3G08990	AT3G08990
AT5G25580	AT5G25580
AT4G18170	WRKY28
AT4G21680	NPF7.2
AT1G53950	AT1G53950
AT1G02920	GSTF7
AT5G10300	HNL
AT3G26460	AT3G26460
AT1G63440	HMA5
AT3G02040	GDPD1
AT5G12970	AT5G12970
AT3G50870	GATA18
AT1G02230	NAC004
AT5G65090	MRH3
AT5G50330	AT5G50330
AT5G35960	AT5G35960
AT2G46450	CNGC12
AT2G24170	TMN10
AT1G36060	WIND3
AT5G24900	CYP714A2
AT5G54970	AT5G54970
AT1G23000	AT1G23000
AT4G27730	OPT6
AT2G42885	AT2G42885
AT5G52640	HSP81-1
AT1G73010	PS2
AT3G25795	AT3G25795
AT5G21280	AT5G21280
AT4G12580	AT4G12580
AT5G24990	AT5G24990
AT1G79450	ALIS5
AT2G46440	CNGC11
AT5G11360	AT5G11360
AT5G52910	ATIM
AT1G74210	GDPD5
AT1G54010	GLL23
AT4G35070	AT4G35070
AT1G14210	AT1G14210
AT3G61897	MIR166B
AT5G46700	TRN2
AT3G27220	AT3G27220
AT3G21465	AT3G21465
AT2G24285	AT2G24285
AT3G48670	IDN2
AT3G26120	TEL1
AT5G43250	NF-YC13
AT4G39800	IPS1
AT1G05730	AT1G05730
AT5G37485	AT5G37485
AT2G41290	SSL2
AT4G22250	AT4G22250
AT1G55700	AT1G55700
AT2G31390	AT2G31390
AT4G24260	KOR3
AT5G28650	WRKY74
AT5G57790	AT5G57790
AT5G27100	GLR2.1
AT5G64810	WRKY51
AT3G13437	AT3G13437
AT5G58520	AT5G58520
AT1G05680	UGT74E2
AT1G60740	PRXIID
AT1G63420	AT1G63420
AT1G16300	GAPCP2
AT3G15650	AT3G15650
AT5G01820	CIPK14
AT2G38870	AT2G38870
AT3G04660	AT3G04660
AT1G75580	AT1G75580
AT1G74205	AT1G74205
AT2G43570	CHI
AT2G34650	PID
AT5G65530	AT5G65530
AT3G17840	RLK902
AT5G43040	AT5G43040
AT3G26742	AT3G26742
AT4G19460	AT4G19460
AT1G19250	FMO1
AT2G39705	RTFL8
AT4G29270	AT4G29270
AT5G14610	RH46
AT1G49910	BUB3.2
AT1G03120	ATRAB28
AT5G14000	anac084
AT1G55210	DIR20
AT3G21240	4CL2
AT3G05730	AT3G05730
AT1G12550	HPR3
AT4G14640	CML8
AT4G32295	AT4G32295
AT2G36890	RAX2
AT1G69310	WRKY57
AT2G46140	AT2G46140
AT5G19550	ASP2
AT5G41880	POLA3
AT2G38180	AT2G38180
AT5G65850	AT5G65850
AT3G23640	HGL1
AT5G56220	AT5G56220
AT3G07260	FHA1
AT5G26670	PAE10
AT1G02930	GSTF6
AT3G23780	NRPD2
AT5G52950	AT5G52950
AT5G02420	SMR3
AT1G53860	AT1G53860
AT1G54385	AT1G54385
AT2G34840	AT2G34840
AT3G48700	CXE13
AT4G18360	GLO5
AT1G52340	ABA2
AT1G11040	AT1G11040
AT1G30950	UFO
AT4G26590	OPT5
AT1G78190	AT1G78190
AT2G43510	ATTI1
AT4G11810	AT4G11810
AT1G73860	AT1G73860
AT4G28390	AAC3
AT1G32240	KAN2
AT1G05280	AT1G05280
AT5G46280	MCM3
AT3G10040	AT3G10040
AT1G71770	PAB5
AT5G40270	AT5G40270
AT4G31890	AT4G31890
AT2G37380	MAKR3
AT2G22600	AT2G22600
AT1G24590	ESR2
AT5G38780	AT5G38780
AT2G31902	AT2G31902
AT2G33380	PXG3
AT1G69295	PDCB4
AT2G34340	AT2G34340
AT4G31877	MIR156C
AT1G78480	AT1G78480
AT3G56220	AT3G56220
AT1G32780	AT1G32780
AT3G57780	AT3G57780
AT1G73680	DOX2
AT1G13590	PSK1
AT5G51580	AT5G51580
AT5G50710	AT5G50710
AT2G45130	SPX3
AT5G17700	AT5G17700
AT5G57320	VLN5
AT3G44310	NIT1

## Sheet: up-GO
GO biological process complete	Arabidopsis thaliana - REFLIST (27475)	count	expected	fold Enrichment	P-value
gibberellin catabolic process	11	6	0.64	9.44	0.0356
diterpenoid catabolic process	11	6	0.64	9.44	0.0356
nutrient storage	29	15	1.68	8.95	2.41e-08
lipid storage	29	15	1.68	8.95	2.41e-08
isoprenoid catabolic process	25	10	1.44	6.93	0.00159
gibberellin metabolic process	33	12	1.91	6.3	0.000406
somatic embryogenesis	25	9	1.44	6.23	0.0166
dormancy process	42	13	2.43	5.36	0.00108
seed dormancy process	42	13	2.43	5.36	0.00108
seed maturation	70	21	4.04	5.19	5.86e-07
diterpenoid metabolic process	65	15	3.75	4	0.00898
pectin catabolic process	98	20	5.66	3.53	0.00184
detoxification	160	30	9.24	3.25	2.67e-05
response to toxic substance	184	32	10.63	3.01	5.79e-05
multicellular organismal reproductive process	202	32	11.67	2.74	0.000547
polysaccharide catabolic process	154	24	8.9	2.7	0.0233
terpenoid metabolic process	180	28	10.4	2.69	0.00448
response to hypoxia	267	34	15.42	2.2	0.0415
response to abscisic acid	545	64	31.48	2.03	0.0002
response to alcohol	554	64	32	2	0.000422
seed development	776	80	44.82	1.78	0.00127
fruit development	805	80	46.5	1.72	0.00634
response to lipid	912	88	52.68	1.67	0.00619
response to hormone	1399	134	80.81	1.66	1.74e-05
response to endogenous stimulus	1400	134	80.87	1.66	1.78e-05
reproductive structure development	1284	118	74.17	1.59	0.00158
reproductive system development	1286	118	74.28	1.59	0.00163
response to chemical	2756	242	159.19	1.52	5.28e-08
developmental process involved in reproduction	1547	133	89.36	1.49	0.0103
system development	2042	165	117.95	1.4	0.0289
response to stress	3500	264	202.17	1.31	0.0101
response to stimulus	6027	449	348.13	1.29	2.72e-06

## Sheet: val1val2-co-down
ID	name
AT1G01140	CIPK9
AT1G01880	GEN1
AT1G02020	AT1G02020
AT1G02620	AT1G02620
AT1G02660	AT1G02660
AT1G02900	RALF1
AT1G03090	MCCA
AT1G03340	AT1G03340
AT1G03600	PSB27-1
AT1G04050	SUVR1
AT1G05260	PER3
AT1G05540	AT1G05540
AT1G06240	AT1G06240
AT1G06830	GRXS11
AT1G07110	FKFBP
AT1G08550	VDE1
AT1G08610	AT1G08610
AT1G08980	AMI1
AT1G09600	AT1G09600
AT1G10070	BCAT2
AT1G10110	AT1G10110
AT1G10155	ATPP2-A10
AT1G11180	SCAMP5
AT1G11960	AT1G11960
AT1G12240	BFRUCT4
AT1G13650	AT1G13650
AT1G13790	FDM4
AT1G14490	AHL28
AT1G14790	RDR1
AT1G15180	AT1G15180
AT1G15380	AT1G15380
AT1G16120	WAKL1
AT1G16170	AT1G16170
AT1G16260	WAKL8
AT1G17147	VQ1
AT1G17255	AT1G17255
AT1G17600	AT1G17600
AT1G17610	AT1G17610
AT1G18750	AGL65
AT1G18990	MYOB5
AT1G19050	ARR7
AT1G20400	AT1G20400
AT1G20490	AT1G20490
AT1G20570	AT1G20570
AT1G21100	AT1G21100
AT1G21680	AT1G21680
AT1G22530	PATL2
AT1G22550	NPF5.16
AT1G22570	NPF5.15
AT1G22690	GASA9
AT1G22885	AT1G22885
AT1G22980	AT1G22980
AT1G23310	GGAT1
AT1G23760	JP630
AT1G23840	AT1G23840
AT1G23870	TPS9
AT1G23935	AT1G23935
AT1G26540	AT1G26540
AT1G27110	AT1G27110
AT1G27480	LCAT1
AT1G29600	AT1G29600
AT1G29730	AT1G29730
AT1G29740	AT1G29740
AT1G29920	LHCB1.2
AT1G30360	ERD4
AT1G30520	AAE14
AT1G30820	AT1G30820
AT1G33540	scpl18
AT1G35240	ARF20
AT1G36070	AT1G36070
AT1G37130	NIA2
AT1G43160	RAP2-6
AT1G43670	AT1G43670
AT1G44350	ILL6
AT1G44740	AT1G44740
AT1G45145	TRX5
AT1G45163	AT1G45163
AT1G45230	AT1G45230
AT1G48390	AT1G48390
AT1G49380	CCS1
AT1G49450	AT1G49450
AT1G49490	PEX2
AT1G49530	GGPP6
AT1G50040	AT1G50040
AT1G50732	AT1G50732
AT1G50750	AT1G50750
AT1G50970	AT1G50970
AT1G51090	AT1G51090
AT1G51270	PVA14
AT1G51520	AT1G51520
AT1G51830	AT1G51830
AT1G52650	AT1G52650
AT1G52870	AT1G52870
AT1G52920	GCR2
AT1G53350	RPP8L2
AT1G53560	AT1G53560
AT1G53870	AT1G53870
AT1G53890	AT1G53890
AT1G53903	AT1G53903
AT1G53940	GLIP2
AT1G54215	AT1G54215
AT1G54310	AT1G54310
AT1G55152	AT1G55152
AT1G57943	PUP17
AT1G57980	PUP22
AT1G58070	AT1G58070
AT1G58370	RXF12
AT1G59840	CCB4
AT1G60950	FD2
AT1G61300	AT1G61300
AT1G61310	AT1G61310
AT1G61660	BHLH112
AT1G61750	CRRSP1
AT1G62320	AT1G62320
AT1G62670	RPF2
AT1G63180	UGE3
AT1G64200	VHA-E3
AT1G64680	AT1G64680
AT1G64720	CP5
AT1G65230	AT1G65230
AT1G65480	FT
AT1G65800	SD16
AT1G66100	AT1G66100
AT1G66173	AT1G66173
AT1G66540	AT1G66540
AT1G66910	AT1G66910
AT1G67460	AT1G67460
AT1G67700	HHL1
AT1G67865	AT1G67865
AT1G68010	HPR
AT1G68110	AT1G68110
AT1G68190	AT1G68190
AT1G68650	AT1G68650
AT1G68980	AT1G68980
AT1G69020	AT1G69020
AT1G69523	AT1G69523
AT1G69526	AT1G69526
AT1G70700	TIFY7
AT1G70760	ndhL
AT1G70880	AT1G70880
AT1G71500	AT1G71500
AT1G72180	AT1G72180
AT1G72610	GLP1
AT1G72930	TIR
AT1G73300	SCPL2
AT1G73885	AT1G73885
AT1G73910	ARP4A
AT1G75960	AAE8
AT1G76190	AT1G76190
AT1G76530	AT1G76530
AT1G76700	ATJ10
AT1G77060	AT1G77060
AT1G77760	NIA1
AT1G78540	SHB
AT1G80380	GLYK
AT2G01590	CRR3
AT2G01918	PQL3
AT2G03710	AGL3
AT2G04090	DTXL4
AT2G04450	NUDT6
AT2G04780	FLA7
AT2G04790	AT2G04790
AT2G04800	AT2G04800
AT2G05160	AT2G05160
AT2G05510	AT2G05510
AT2G05620	PGR5
AT2G05995	AT2G05995
AT2G06050	OPR3
AT2G10931	AT2G10931
AT2G11910	AT2G11910
AT2G12190	AT2G12190
AT2G13360	AGT1
AT2G13680	CALS5
AT2G13960	AT2G13960
AT2G14100	CYP705A13
AT2G16380	SFH7
AT2G17840	ERD7
AT2G18196	AT2G18196
AT2G18800	XTH21
AT2G20960	pEARLI4
AT2G22122	AT2G22122
AT2G22630	AGL17
AT2G22650	AT2G22650
AT2G22750	BHLH18
AT2G22850	AtbZIP6
AT2G22980	SCPL13
AT2G22990	SCPL8
AT2G23400	AT2G23400
AT2G23560	MES7
AT2G24440	AT2G24440
AT2G24680	REM12
AT2G25450	GSL-OH
AT2G25780	AT2G25780
AT2G26500	AT2G26500
AT2G28105	AT2G28105
AT2G28305	LOG1
AT2G29180	AT2G29180
AT2G29310	AT2G29310
AT2G29720	CTF2B
AT2G30280	RDM4
AT2G30600	AT2G30600
AT2G31083	CLE5
AT2G31085	CLE6
AT2G32150	AT2G32150
AT2G32640	AT2G32640
AT2G33790	AGP30
AT2G33855	AT2G33855
AT2G34430	LHB1B1
AT2G34500	CYP710A1
AT2G34510	AT2G34510
AT2G35075	AT2G35075
AT2G35130	AT2G35130
AT2G35760	AT2G35760
AT2G36340	AT2G36340
AT2G36420	AT2G36420
AT2G36540	AT2G36540
AT2G36590	PROT3
AT2G37180	PIP2-3
AT2G37540	AT2G37540
AT2G38695	AT2G38695
AT2G38760	ANN3
AT2G39240	AT2G39240
AT2G39470	PNSL1
AT2G39570	ACR9
AT2G40710	AT2G40710
AT2G40711	AT2G40711
AT2G40960	AT2G40960
AT2G41210	PIP5K5
AT2G42510	AT2G42510
AT2G43550	ATTI6
AT2G43900	5PTASE12
AT2G45660	SOC1
AT2G45740	PEX11D
AT2G45820	DBP
AT2G45930	AT2G45930
AT2G47370	AT2G47370
AT2G47730	GSTF8
AT2G48020	AT2G48020
AT3G01770	GTE11
AT3G02060	AT3G02060
AT3G02140	AFP4
AT3G02510	AT3G02510
AT3G02850	SKOR
AT3G03630	CS26
AT3G04450	AT3G04450
AT3G04960	AT3G04960
AT3G05625	AT3G05625
AT3G05727	AT3G05727
AT3G06750	AT3G06750
AT3G06950	AT3G06950
AT3G10300	CML49
AT3G10985	SAG20
AT3G11090	LBD21
AT3G11560	AT3G11560
AT3G13850	LBD22
AT3G14160	AT3G14160
AT3G14770	SWEET2
AT3G15620	UVR3
AT3G15770	AT3G15770
AT3G15900	AT3G15900
AT3G16030	CES101
AT3G16250	PNSB3
AT3G16650	PRL2
AT3G16690	SWEET16
AT3G17510	CIPK1
AT3G18320	AT3G18320
AT3G18780	ACT2
AT3G19030	AT3G19030
AT3G19170	PREP1
AT3G19390	AT3G19400
AT3G20935	CYP705A28
AT3G21460	GRXS10
AT3G21870	CYCU1-1
AT3G23080	AT3G23080
AT3G23100	XRCC4
AT3G23510	AT3G23510
AT3G23700	AT3G23700
AT3G24065	AT3G24065
AT3G24360	AT3G24360
AT3G24520	HSFC1
AT3G24540	PERK3
AT3G24560	RSY3
AT3G25190	AT3G25190
AT3G26310	CYP71B35
AT3G26650	GAPA1
AT3G26815	MIR169K
AT3G27860	AT3G27860
AT3G28080	AT3G28080
AT3G28270	AT3G28270
AT3G28290	AT14A
AT3G28300	AT14A
AT3G28770	AT3G28770
AT3G29190	#N/A
AT3G29280	AT3G29280
AT3G29375	AT3G29375
AT3G29633	AT3G29633
AT3G43540	AT3G43540
AT3G43740	AT3G43740
AT3G43790	ZIFL2
AT3G44120	AT3G44120
AT3G44790	AT3G44790
AT3G45430	LECRK15
AT3G45700	NPF2.4
AT3G46370	AT3G46370
AT3G46400	AT3G46400
AT3G46500	AT3G46500
AT3G46710	RPP13L2
AT3G46880	AT3G46880
AT3G47010	AT3G47010
AT3G47070	AT3G47070
AT3G47340	ASN1
AT3G47510	AT3G47510
AT3G47580	AT3G47580
AT3G47650	AT3G47650
AT3G48090	EDS1
AT3G48120	AT3G48120
AT3G48200	AT3G48200
AT3G48360	BT2
AT3G48390	AT3G48390
AT3G51070	AT3G51070
AT3G51075	AT3G51075
AT3G51325	AT3G51325
AT3G51420	SSL4
AT3G51870	EAAC
AT3G52840	BGAL2
AT3G54880	AT3G54880
AT3G55040	GSTL2
AT3G55630	FPGS3
AT3G55710	UGT76F2
AT3G55880	SUE4
AT3G56000	CSLA14
AT3G56090	FER3
AT3G56140	AT3G56140
AT3G57160	AT3G57160
AT3G57180	BPG2
AT3G57520	RFS2
AT3G57740	AT3G57740
AT3G57770	AT3G57770
AT3G59200	AT3G59200
AT3G59250	AT3G59250
AT3G59310	AT3G59310
AT3G59480	AT3G59480
AT3G59580	NLP9
AT3G59790	MPK10
AT3G61060	PP2A13
AT3G61260	AT3G61260
AT3G63240	AT3G63240
AT3G63370	OTP86
AT4G00110	GAE3
AT4G00150	SCL6
AT4G01330	AT4G01330
AT4G01820	ABCB3
AT4G01915	AT4G01915
AT4G02130	GATL6
AT4G03610	AT4G03610
AT4G03935	AT4G03935
AT4G04695	CPK31
AT4G07820	AT4G07820
AT4G10300	AT4G10300
AT4G10310	HKT1
AT4G11410	AT4G11410
AT4G12382	AT4G12382
AT4G12520	AT4G12520
AT4G12740	MYH
AT4G12830	AT4G12830
AT4G12917	AT4G12917
AT4G13300	TPS13
AT4G13310	CYP71A20
AT4G13340	LRX3
AT4G13493	MIR850A
AT4G13494	MIR863A
AT4G13495	AT4G13495
AT4G13560	UNE15
AT4G13570	HTA4
AT4G13572	AT4G13572
AT4G13575	AT4G13575
AT4G13810	AtRLP47
AT4G14103	AT4G14103
AT4G15660	GRXS8
AT4G15700	GRXS3
AT4G15990	AT4G15990
AT4G16680	AT4G16680
AT4G16880	AT4G16880
AT4G17090	BAM3
AT4G17180	AT4G17180
AT4G17220	MAP70.5
AT4G17810	AT4G17810
AT4G17970	ALMT12
AT4G18050	ABCB9
AT4G18220	AT4G18220
AT4G18280	AT4G18280
AT4G19530	AT4G19530
AT4G19920	AT4G19920
AT4G20230	TPS09
AT4G20235	CYP71A28
AT4G20362	AT4G20362
AT4G22212	AT4G22212
AT4G22517	AT4G22517
AT4G22980	AT4G22980
AT4G23180	CRK10
AT4G23570	SGT1A
AT4G24015	RHA4A
AT4G24972	TPD1
AT4G25170	AT4G25170
AT4G25270	PCMP-E53
AT4G25700	BETA-OHASE 1
AT4G25830	AT4G25830
AT4G25910	NIFU3
AT4G26320	AGP13
AT4G26520	AT4G26520
AT4G26530	AT4G26530
AT4G27520	ENODL2
AT4G27980	AT4G27980
AT4G28080	AT4G28080
AT4G29610	CDA6
AT4G30450	AT4G30450
AT4G31110	WAKL18
AT4G32060	AT4G32060
AT4G32860	AT4G32860
AT4G32990	AT4G32990
AT4G33120	AT4G33120
AT4G33930	AT4G33930
AT4G35250	AT4G35250
AT4G35440	CLC-E
AT4G35900	FD
AT4G36710	SCL15
AT4G37409	AT4G37409
AT4G37410	CYP81F4
AT4G38225	AT4G38225
AT4G38390	RHS17
AT4G38460	GGR
AT4G38470	AT4G38470
AT4G39780	ERF060
AT5G01015	AT5G01015
AT5G01740	AT5G01740
AT5G02160	AT5G02160
AT5G02940	AT5G02940
AT5G03130	AT5G03130
AT5G03390	AT5G03390
AT5G04770	CAT6
AT5G04780	PCMP-H16
AT5G04810	PPR4
AT5G04980	AT5G04980
AT5G05190	Y-1
AT5G05320	AT5G05320
AT5G05690	CYP90A1
AT5G06820	SRF2
AT5G07070	CIPK2
AT5G07110	PRA1B6
AT5G07870	AT5G07870
AT5G07880	SNAP29
AT5G08050	AT5G08050
AT5G08600	AT5G08600
AT5G08650	AT5G08650
AT5G09820	PAP7
AT5G10230	ANNAT7
AT5G10250	DOT3
AT5G10600	CYP81K2
AT5G10605	AT5G10605
AT5G10946	AT5G10946
AT5G10950	AT5G10950
AT5G11070	AT5G11070
AT5G11290	AT5G11290
AT5G13650	AT5G13650
AT5G13660	AT5G13660
AT5G13830	AT5G13830
AT5G14070	GRXC8
AT5G14120	AT5G14120
AT5G14470	GLCAK2
AT5G14740	BCA2
AT5G17165	AT5G17165
AT5G17670	AT5G17670
AT5G17880	CSA1
AT5G18770	AT5G18770
AT5G21430	ndhU
AT5G21930	PAA2
AT5G22390	AT5G22390
AT5G23120	HCF136
AT5G23480	AT5G23480
AT5G23580	CPK12
AT5G23770	DUF8
AT5G23780	DUF9
AT5G24060	AT5G24060
AT5G24140	SQE4
AT5G24410	PGL4
AT5G24420	PGL5
AT5G24750	AT5G24750
AT5G25230	AT5G25230
AT5G26730	AT5G26730
AT5G27290	AT5G27290
AT5G28080	WNK9
AT5G30495	AT5G30495
AT5G33355	AT5G33355
AT5G34930	TYRAAT1
AT5G35940	JAL41
AT5G37000	AT5G37000
AT5G37990	AT5G37990
AT5G38344	AT5G38344
AT5G38350	AT5G38350
AT5G38510	AT5G38510
AT5G38520	AT5G38520
AT5G42460	AT5G42460
AT5G42650	CYP74A
AT5G44050	AT5G44050
AT5G45040	PETJ
AT5G45050	WRKY16
AT5G45060	AT5G45060
AT5G45070	PP2A8
AT5G45150	RTL3
AT5G45220	AT5G45220
AT5G45440	AT5G45440
AT5G45680	FKBP13
AT5G45840	AT5G45840
AT5G45960	AT5G45960
AT5G46890	AT5G46890
AT5G46900	AT5G46900
AT5G46915	AT5G46915
AT5G47040	LON2
AT5G47240	NUDT8
AT5G47450	TIP2-3
AT5G47900	AT5G47900
AT5G48110	AT5G48110
AT5G48390	ZIP4
AT5G48980	AT5G48980
AT5G49730	FRO6
AT5G50180	AT5G50180
AT5G50915	BHLH137
AT5G50950	FUM2
AT5G51010	AT5G51010
AT5G51780	BHLH36
AT5G51790	BHLH120
AT5G51795	AT5G51795
AT5G52100	DAPB3
AT5G52790	CBSDUF5
AT5G53190	SWEET3
AT5G53580	PLR1
AT5G54090	AT5G54090
AT5G54380	THE1
AT5G55570	AT5G55570
AT5G56370	AT5G56370
AT5G56380	AT5G56380
AT5G56910	AT5G56910
AT5G57170	AT5G57170
AT5G57190	PSD2
AT5G58090	AT5G58090
AT5G59080	AT5G59080
AT5G59260	LECRK21
AT5G60100	APRR3
AT5G60142	AT5G60142
AT5G61380	APRR1
AT5G61410	RPE
AT5G62165	AGL42
AT5G62240	AT5G62240
AT5G62840	AT5G62840
AT5G62920	ARR6
AT5G63160	BT1
AT5G63450	CYP94B1
AT5G64380	AT5G64380
AT5G66052	AT5G66052
AT5G66080	AT5G66080
AT5G66660	AT5G66660
AT5G66800	AT5G66800

## Sheet: down-GO
GO biological process complete	Arabidopsis thaliana - REFLIST (27475)	count	expected	fold Enrichment	P-value
photosynthesis, light reaction	133	15	2.64	5.69	0.000183
photosynthesis	190	20	3.77	5.31	4.1e-06
