# Supplementary material for: A FUS3-VAL transcriptional negative feedback circuit terminates seed maturation program and safeguards vegetative development
Source: Research Square preprint supplement (doi:10.21203/rs.3.rs-7986565/v1), 2025-11-12
Supplement: Supplementary file 5 [file 6a88df1a96adaed9817fdcc6.xlsx]

## Sheet: VAL1 target genes
ID	name
AT1G01010	NAC001
AT1G01020	ARV1
AT1G01030	NGA3
AT1G01040	DCL1
AT1G01050	PPA1
AT1G01060	LHY
AT1G01070	AT1G01070
AT1G01080	AT1G01080
AT1G01090	PDH-E1 ALPHA
AT1G01120	KCS1
AT1G01130	AT1G01130
AT1G01140	CIPK9
AT1G01183	AT1G01183
AT1G01190	CYP78A8
AT1G01200	RABA3
AT1G01220	FKGP
AT1G01225	AT1G01225
AT1G01230	AT1G01230
AT1G01240	AT1G01240
AT1G01250	ERF023
AT1G01260	BHLH13
AT1G01300	AT1G01300
AT1G01310	AT1G01310
AT1G01320	AT1G01320
AT1G01340	CNGC10
AT1G01360	PYL9
AT1G01370	HTR12
AT1G01380	ETC1
AT1G01390	UGT72B2
AT1G01410	AT1G01410
AT1G01420	UGT72B3
AT1G01440	AT1G01440
AT1G01453	AT1G01453
AT1G01470	LEA14
AT1G01480	ACS2
AT1G01490	AT1G01490
AT1G01500	AT1G01500
AT1G01510	AN
AT1G01520	RVE3
AT1G01540	AT1G01540
AT1G01550	BPS1
AT1G01560	MPK11
AT1G01570	AT1G01570
AT1G01580	FRO2
AT1G01590	AT1G01590
AT1G01600	CYP86A4
AT1G01610	GPAT4
AT1G01650	SPPL4
AT1G01670	PUB56
AT1G01680	PUB54
AT1G01695	AT1G01695
AT1G01700	ROPGEF2
AT1G01720	NAC002
AT1G01760	AT1G01760
AT1G01800	AT1G01800
AT1G01810	AT1G01810
AT1G01830	AT1G01830
AT1G01860	PFC1
AT1G01910	AT1G01910
AT1G01930	AT1G01930
AT1G01950	ARK2
AT1G01960	BIG3
AT1G01980	AT1G01980
AT1G01990	AT1G01990
AT1G02020	AT1G02020
AT1G02030	ZAT1
AT1G02040	AT1G02040
AT1G02065	SPL8
AT1G02070	AT1G02070
AT1G02080	AT1G02080
AT1G02090	CSN7
AT1G02120	VAD1
AT1G02140	MEE63
AT1G02160	AT1G02160
AT1G02180	AT1G02180
AT1G02205	CER1
AT1G02210	AT1G02210
AT1G02220	NAC003
AT1G02228	AT1G02228
AT1G02230	NAC004
AT1G02250	NAC005
AT1G02260	AT1G02260
AT1G02270	AT1G02270
AT1G02300	AT1G02300
AT1G02305	AT1G02305
AT1G02310	MAN1
AT1G02330	AT1G02330
AT1G02335	GL22
AT1G02340	HFR1
AT1G02370	AT1G02370
AT1G02380	AT1G02380
AT1G02390	GPAT2
AT1G02391	AT1G02391
AT1G02400	GA2OX6
AT1G02405	AT1G02405
AT1G02420	AT1G02420
AT1G02450	NIMIN-1
AT1G02460	AT1G02460
AT1G02475	AT1G02475
AT1G02490	AT1G02490
AT1G02500	SAM1
AT1G02520	ABCB11
AT1G02530	ABCB12
AT1G02560	CLPP5
AT1G02580	MEA
AT1G02600	AT1G02600
AT1G02610	AT1G02610
AT1G02630	ETN8
AT1G02640	BXL2
AT1G02650	AT1G02650
AT1G02660	AT1G02660
AT1G02680	TAF13
AT1G02690	IMPA6
AT1G02700	AT1G02700
AT1G02720	GATL5
AT1G02770	AT1G02770
AT1G02790	PGA3
AT1G02800	CEL2
AT1G02810	PME7
AT1G02830	AT1G02830
AT1G02840	SR34
AT1G02850	BGLU11
AT1G02860	BAH1
AT1G02870	AT1G02870
AT1G02880	TPK1
AT1G02890	AT1G02890
AT1G02900	RALF1
AT1G02910	LPA1
AT1G02920	GSTF7
AT1G02950	GSTF4
AT1G02970	WEE1
AT1G02990	AT1G02990
AT1G03000	PEX6
AT1G03020	GRXS1
AT1G03030	AT1G03030
AT1G03040	BHLH7
AT1G03055	D27
AT1G03070	AT1G03070
AT1G03080	NET1D
AT1G03090	MCCA
AT1G03106	AT1G03106
AT1G03120	ATRAB28
AT1G03130	PSAD2
AT1G03140	AT1G03140
AT1G03160	FZL
AT1G03170	FAF2
AT1G03180	AT1G03180
AT1G03190	UVH6
AT1G03200	AT1G03200
AT1G03220	AT1G03220
AT1G03230	AT1G03230
AT1G03240	AT1G03240
AT1G03250	AT1G03250
AT1G03260	AT1G03260
AT1G03290	AT1G03290
AT1G03300	ATDUF1
AT1G03330	LSM2
AT1G03350	AT1G03350
AT1G03365	RF4
AT1G03370	AT1G03370
AT1G03400	AT1G03400
AT1G03410	2A6
AT1G03440	AT1G03440
AT1G03457	BRN2
AT1G03470	NET3A
AT1G03475	CPX1
AT1G03506	AT1G03506
AT1G03510	PCMP-E3
AT1G03520	AT1G03520
AT1G03530	ATNAF1
AT1G03550	SCAMP2
AT1G03560	AT1G03560
AT1G03590	PPC6-6
AT1G03620	AT1G03620
AT1G03630	PORC
AT1G03680	ATHM1
AT1G03710	AT1G03710
AT1G03720	AT1G03720
AT1G03730	AT1G03730
AT1G03743	AT1G03743
AT1G03800	ERF10
AT1G03830	AT1G03830
AT1G03840	MGP
AT1G03850	GRXS13
AT1G03880	CRB
AT1G03900	ATNAP4
AT1G03905	ABCI19
AT1G03930	ADK1
AT1G03935	AT1G03935
AT1G03950	VPS2.3
AT1G03960	B''EPSILON
AT1G03970	GBF4
AT1G03980	PCS2
AT1G03990	FAO1
AT1G04000	AT1G04000
AT1G04010	PSAT
AT1G04030	AT1G04030
AT1G04040	AT1G04040
AT1G04070	TOM9-1
AT1G04090	AT1G04090
AT1G04100	IAA10
AT1G04120	ABCC5
AT1G04140	AT1G04140
AT1G04150	AT1G04150
AT1G04170	EIF2 GAMMA
AT1G04171	AT1G04171
AT1G04180	YUC9
AT1G04210	AT1G04210
AT1G04220	KCS17
AT1G04240	IAA3
AT1G04250	IAA17
AT1G04260	PRA1D
AT1G04270	RPS15A
AT1G04280	AT1G04280
AT1G04295	AT1G04295
AT1G04300	AT1G04300
AT1G04310	ERS2
AT1G04320	AT1G04320
AT1G04330	AT1G04330
AT1G04350	AT1G04350
AT1G04360	ATL1
AT1G04370	ERF14
AT1G04390	AT1G04390
AT1G04400	CRY2
AT1G04410	MDH1
AT1G04430	AT1G04430
AT1G04440	CKL13
AT1G04445	AT1G04445
AT1G04490	AT1G04490
AT1G04500	AT1G04500
AT1G04520	CRRSP3
AT1G04530	TPR4
AT1G04540	AT1G04540
AT1G04550	IAA12
AT1G04560	AT1G04560
AT1G04570	AT1G04570
AT1G04590	AT1G04590
AT1G04610	YUC3
AT1G04620	HCAR
AT1G04625	AT1G04625
AT1G04630	MEE4
AT1G04650	AT1G04650
AT1G04660	AT1G04660
AT1G04670	AT1G04670
AT1G04680	AT1G04680
AT1G04684	AT1G04684
AT1G04690	KAB1
AT1G04700	AT1G04700
AT1G04710	KAT1
AT1G04720	AT1G04720
AT1G04750	VAMP721
AT1G04770	AT1G04770
AT1G04780	AT1G04780
AT1G04800	AT1G04800
AT1G04820	TUBA4
AT1G04830	AT1G04830
AT1G04850	AT1G04850
AT1G04870	PRMT10
AT1G04880	HMGB15
AT1G04890	AT1G04890
AT1G04900	AT1G04900
AT1G04920	SPS3
AT1G04930	AT1G04930
AT1G04945	AT1G04945
AT1G04960	AT1G04960
AT1G04980	PDIL2-2
AT1G04985	AT1G04985
AT1G04990	AT1G04990
AT1G05000	AT1G05000
AT1G05010	ACO4
AT1G05020	AP180
AT1G05030	AT1G05030
AT1G05055	ATGTF2H2
AT1G05060	AT1G05060
AT1G05061	AT1G05061
AT1G05070	AT1G05070
AT1G05090	AT1G05090
AT1G05100	MAPKKK18
AT1G05120	AT1G05120
AT1G05135	AT1G05135
AT1G05140	ARASP2
AT1G05150	AT1G05150
AT1G05170	B3GALT2
AT1G05180	AXR1
AT1G05200	GLR3.4
AT1G05230	HDG2
AT1G05240	PER1
AT1G05260	PER3
AT1G05270	AT1G05270
AT1G05291	AT1G05291
AT1G05300	ZIP5
AT1G05320	AT1G05320
AT1G05330	AT1G05330
AT1G05340	AT1G05340
AT1G05350	AT1G05350
AT1G05370	AT1G05370
AT1G05385	PSB27-2
AT1G05410	AT1G05410
AT1G05420	OFP12
AT1G05430	AT1G05430
AT1G05450	AT1G05450
AT1G05460	SDE3
AT1G05470	CVP2
AT1G05490	CLSY3
AT1G05510	AT1G05510
AT1G05520	AT1G05520
AT1G05530	UGT75B2
AT1G05550	AT1G05550
AT1G05560	UGT75B1
AT1G05570	CALS1
AT1G05577	AT1G05577
AT1G05600	AT1G05600
AT1G05620	URH2
AT1G05630	5PTASE13
AT1G05640	AT1G05640
AT1G05650	AT1G05650
AT1G05660	AT1G05660
AT1G05670	AT1G05670
AT1G05680	UGT74E2
AT1G05690	BT3
AT1G05700	AT1G05700
AT1G05710	AT1G05710
AT1G05720	AT1G05720
AT1G05750	PDE247
AT1G05770	JAL2
AT1G05785	AT1G05785
AT1G05790	AT1G05790
AT1G05800	DGL
AT1G05805	BHLH128
AT1G05810	ARA
AT1G05830	ATX2
AT1G05835	AT1G05835
AT1G05840	AT1G05840
AT1G05850	CTL1
AT1G05870	AT1G05870
AT1G05890	ARI5
AT1G05900	NTH2
AT1G05940	CAT9
AT1G05950	AT1G05950
AT1G05970	AT1G05970
AT1G06000	UGT89C1
AT1G06020	AT1G06020
AT1G06040	BBX24
AT1G06070	AT1G06070
AT1G06080	ADS1
AT1G06110	SKIP16
AT1G06130	GLX2-4
AT1G06140	PCMP-E61
AT1G06148	AT1G06148
AT1G06149	CPuORF8
AT1G06160	ERF094
AT1G06170	BHLH89
AT1G06180	ATMYB13
AT1G06190	RHON1
AT1G06200	AT1G06200
AT1G06225	AT1G06225
AT1G06270	AT1G06270
AT1G06290	ACX3
AT1G06310	ACX3.2
AT1G06320	AT1G06320
AT1G06330	AT1G06330
AT1G06360	AT1G06360
AT1G06370	AT1G06370
AT1G06390	ASK9
AT1G06410	TPS7
AT1G06430	FTSH8
AT1G06450	CAF1-1
AT1G06460	ACD32.1
AT1G06475	AT1G06475
AT1G06480	AT1G06480
AT1G06510	AT1G06510
AT1G06520	GPAT1
AT1G06530	PMD2
AT1G06570	PDS1
AT1G06640	AT1G06640
AT1G06680	PSBP1
AT1G06690	AT1G06690
AT1G06700	PTI11
AT1G06740	AT1G06740
AT1G06760	AT1G06760
AT1G06770	DRIP1
AT1G06790	AT1G06790
AT1G06800	PLA-I{gamma}1
AT1G06820	CRTISO
AT1G06840	AT1G06840
AT1G06850	AtbZIP52
AT1G06890	AT1G06890
AT1G06900	AT1G06900
AT1G06923	AT1G06923
AT1G06930	AT1G06930
AT1G06950	TIC110
AT1G06980	AT1G06980
AT1G06990	AT1G06990
AT1G07020	AT1G07020
AT1G07030	AT1G07030
AT1G07040	AT1G07040
AT1G07060	AT1G07060
AT1G07080	AT1G07080
AT1G07090	LSH6
AT1G07100	AT1G07100
AT1G07110	FKFBP
AT1G07128	AT1G07128
AT1G07135	AT1G07135
AT1G07160	AT1G07160
AT1G07175	AT1G07175
AT1G07180	NDA1
AT1G07200	AT1G07200
AT1G07220	AT1G07220
AT1G07230	NPC1
AT1G07270	CDC6B
AT1G07280	AT1G07280
AT1G07290	GONST2
AT1G07310	AT1G07310
AT1G07340	AT1G07340
AT1G07350	SR45A
AT1G07360	AT1G07360
AT1G07390	AtRLP1
AT1G07400	HSP17.8
AT1G07420	SMO2-2
AT1G07430	AIP1
AT1G07460	AT1G07460
AT1G07470	AT1G07470
AT1G07480	AT1G07480
AT1G07485	AT1G07485
AT1G07500	AT1G07500
AT1G07520	SCL31
AT1G07530	SCL14
AT1G07540	AT1G07540
AT1G07560	AT1G07560
AT1G07570	APK1A
AT1G07580	AT1G07580
AT1G07590	AT1G07590
AT1G07620	TRM32
AT1G07630	PLL5
AT1G07640	DOF1.1
AT1G07645	ATDSI-1VOC
AT1G07670	ECA4
AT1G07680	AT1G07680
AT1G07700	AT1G07700
AT1G07710	AT1G07710
AT1G07720	KCS3
AT1G07745	RAD51D
AT1G07750	AT1G07750
AT1G07760	AT1G07760
AT1G07770	RPS15AA
AT1G07780	PAI1
AT1G07810	ECA1
AT1G07820	AT1G07820
AT1G07860	AT1G07860
AT1G07870	AT1G07870
AT1G07880	MPK13
AT1G07885	AT1G07885
AT1G07900	LBD1
AT1G07910	ATRNL
AT1G07920	A3
AT1G07930	A3
AT1G07940	A3
AT1G07950	MED22B
AT1G07980	NF-YC10
AT1G08000	GATA10
AT1G08010	GATA11
AT1G08030	TPST
AT1G08040	AT1G08040
AT1G08060	MOM1
AT1G08070	PCMP-H12
AT1G08080	ACA7
AT1G08090	NRT2.1
AT1G08100	AT1G08100
AT1G08110	AT1G08110
AT1G08115	AT1G08115
AT1G08130	LIG1
AT1G08165	AT1G08165
AT1G08190	VPS41
AT1G08200	AXS2
AT1G08210	AT1G08210
AT1G08230	GAT1
AT1G08250	ADT6
AT1G08270	AT1G08270
AT1G08280	AT1G08280
AT1G08290	WIP3
AT1G08310	AT1G08310
AT1G08315	AT1G08315
AT1G08320	TGA9
AT1G08340	ROPGAP5
AT1G08370	DCP1
AT1G08380	PSAO
AT1G08400	MAG2L
AT1G08420	BSL2
AT1G08430	ALMT1
AT1G08440	ALMT2
AT1G08450	CRT3
AT1G08460	HDA8
AT1G08465	YAB2
AT1G08470	SSL3
AT1G08490	NFS2
AT1G08500	ENODL18
AT1G08510	FATB
AT1G08520	CHLD
AT1G08540	SIGB
AT1G08570	ACHT4
AT1G08580	AT1G08580
AT1G08592	AT1G08592
AT1G08620	JMJ16
AT1G08630	THA1
AT1G08640	CJD1
AT1G08650	PPCK1
AT1G08660	MGP2
AT1G08680	AGD14
AT1G08695	AT1G08695
AT1G08700	PS1
AT1G08720	EDR1
AT1G08760	AT1G08760
AT1G08770	PRA1E
AT1G08780	AIP3
AT1G08810	MYB60
AT1G08820	PVA22
AT1G08845	AT1G08845
AT1G08860	BON3
AT1G08870	AT1G08870
AT1G08900	SUGTL3
AT1G08910	AT1G08910
AT1G08920	SUGTL2
AT1G08930	ERD6
AT1G08940	AT1G08940
AT1G08970	NFYC9
AT1G08980	AMI1
AT1G08990	GUX5
AT1G09010	EBM
AT1G09040	AT1G09040
AT1G09050	AT1G09050
AT1G09060	AT1G09060
AT1G09070	SRC2
AT1G09090	RBOHB
AT1G09130	CLPR3
AT1G09140	SR30
AT1G09155	PP2B15
AT1G09157	AT1G09157
AT1G09160	AT1G09160
AT1G09176	AT1G09176
AT1G09190	PCMP-E70
AT1G09200	HTR2
AT1G09210	CRT2
AT1G09230	SNRNP65
AT1G09240	NAS3
AT1G09250	BHLH149
AT1G09270	IMPA4
AT1G09310	AT1G09310
AT1G09320	AT1G09320
AT1G09350	GOLS3
AT1G09380	AT1G09380
AT1G09390	AT1G09390
AT1G09400	AT1G09400
AT1G09415	NIMIN-3
AT1G09420	G6PD4
AT1G09440	AT1G09440
AT1G09460	AT1G09460
AT1G09470	AT1G09470
AT1G09486	AT1G09486
AT1G09490	AT1G09490
AT1G09500	AT1G09500
AT1G09520	AT1G09520
AT1G09530	PIF3
AT1G09540	MYB61
AT1G09560	GLP4
AT1G09570	PHYA
AT1G09580	AT1G09580
AT1G09600	AT1G09600
AT1G09630	RABA2A
AT1G09645	AT1G09645
AT1G09660	AT1G09660
AT1G09680	AT1G09680
AT1G09710	AT1G09710
AT1G09730	ULP2B
AT1G09750	AT1G09750
AT1G09760	U2A'
AT1G09780	PGM1
AT1G09795	HISN1B
AT1G09800	AT1G09800
AT1G09810	ECT11
AT1G09812	AT1G09812
AT1G09815	POLD4
AT1G09820	AT1G09820
AT1G09850	XBCP3
AT1G09870	AT1G09870
AT1G09880	AT1G09880
AT1G09920	AT1G09920
AT1G09930	OPT2
AT1G09932	AT1G09932
AT1G09935	AT1G09935
AT1G09940	HEMA2
AT1G09960	SUC4
AT1G09970	LRR XI-23
AT1G09980	AT1G09980
AT1G09995	AT1G09995
AT1G10010	AT1G10010
AT1G10020	AT1G10020
AT1G10040	AT1G10040
AT1G10060	BCAT1
AT1G10070	BCAT2
AT1G10090	AT1G10090
AT1G10095	AT1G10095
AT1G10110	AT1G10110
AT1G10120	BHLH74
AT1G10130	ECA3
AT1G10140	AT1G10140
AT1G10170	NFXL1
AT1G10180	EXO84C
AT1G10200	WLIM1
AT1G10220	AT1G10220
AT1G10230	ASK18
AT1G10240	FRS11
AT1G10270	GRP23
AT1G10280	AT1G10280
AT1G10290	DRP2A
AT1G10300	AT1G10300
AT1G10340	AT1G10340
AT1G10350	AT1G10350
AT1G10360	GSTU18
AT1G10380	AT1G10380
AT1G10385	EXO84A
AT1G10390	NUP98A
AT1G10400	UGT90A2
AT1G10410	AT1G10410
AT1G10417	AT1G10417
AT1G10430	PP2A2
AT1G10460	GLP7
AT1G10470	ARR4
AT1G10480	ZFP5
AT1G10490	AT1G10490
AT1G10500	ISCA
AT1G10520	AT1G10520
AT1G10530	AT1G10530
AT1G10538	AT1G10538
AT1G10550	XTH33
AT1G10580	AT1G10580
AT1G10585	AT1G10585
AT1G10588	AT1G10588
AT1G10590	AT1G10590
AT1G10620	AT1G10620
AT1G10630	ATARFA1F
AT1G10640	AT1G10640
AT1G10650	AT1G10650
AT1G10652	AT1G10652
AT1G10657	AT1G10657
AT1G10680	ABCB10
AT1G10682	AT1G10682
AT1G10690	AT1G10690
AT1G10700	PRS3
AT1G10710	PHS1
AT1G10717	AT1G10717
AT1G10730	AP1M1
AT1G10740	AT1G10740
AT1G10745	AT1G10745
AT1G10750	AT1G10750
AT1G10760	GWD1
AT1G10770	AT1G10770
AT1G10810	AT1G10810
AT1G10820	AT1G10820
AT1G10870	AGD4
AT1G10880	AT1G10880
AT1G10890	AT1G10890
AT1G10900	PIP5K7
AT1G10920	LOV1
AT1G10930	RECQL4A
AT1G10940	SRK2A
AT1G10960	FD1
AT1G11000	MLO4
AT1G11040	AT1G11040
AT1G11060	AT1G11060
AT1G11080	SCPL31
AT1G11090	AT1G11090
AT1G11110	AT1G11110
AT1G11112	AT1G11112
AT1G11120	AT1G11120
AT1G11125	AT1G11125
AT1G11130	SUB
AT1G11160	AT1G11160
AT1G11170	AT1G11170
AT1G11175	AT1G11175
AT1G11185	AT1G11185
AT1G11210	AT1G11210
AT1G11220	AT1G11220
AT1G11230	AT1G11230
AT1G11240	AT1G11240
AT1G11250	SYP125
AT1G11260	STP1
AT1G11280	AT1G11280
AT1G11290	PCMP-H40
AT1G11310	MLO2
AT1G11320	AT1G11320
AT1G11330	AT1G11330
AT1G11350	SD113
AT1G11360	AT1G11360
AT1G11362	AT1G11362
AT1G11370	PME56
AT1G11390	AT1G11390
AT1G11420	ATDUF2
AT1G11440	AT1G11440
AT1G11460	AT1G11460
AT1G11520	AT1G11520
AT1G11530	CXXS1
AT1G11540	AT1G11540
AT1G11545	XTH8
AT1G11570	NTL
AT1G11580	PME18
AT1G11590	PME19
AT1G11592	AT1G11592
AT1G11600	CYP77B1
AT1G11608	AT1G11608
AT1G11620	AT1G11620
AT1G11630	AT1G11630
AT1G11660	HSP70-16
AT1G11670	AT1G11670
AT1G11680	CYP51G1
AT1G11690	AT1G11690
AT1G11700	AT1G11700
AT1G11720	SS3
AT1G11735	MIR171B
AT1G11740	AT1G11740
AT1G11755	LEW1
AT1G11770	AT1G11770
AT1G11790	ADT1
AT1G11800	AT1G11800
AT1G11820	AT1G11820
AT1G11840	ATGLX1
AT1G11850	AT1G11850
AT1G11900	AT1G11900
AT1G11905	AT1G11905
AT1G11910	APA1
AT1G11915	AT1G11915
AT1G11920	AT1G11920
AT1G11940	AT1G11940
AT1G11950	AT1G11950
AT1G11960	AT1G11960
AT1G12000	PFP-BETA1
AT1G12020	AT1G12020
AT1G12030	AT1G12030
AT1G12050	AT1G12050
AT1G12060	BAG5
AT1G12070	AT1G12070
AT1G12080	AT1G12080
AT1G12090	ELP
AT1G12100	AT1G12100
AT1G12110	NPF6.3
AT1G12120	AT1G12120
AT1G12140	FMOGS-OX5
AT1G12150	AT1G12150
AT1G12180	AT1G12180
AT1G12200	AT1G12200
AT1G12210	RFL1
AT1G12211	AT1G12211
AT1G12230	AT1G12230
AT1G12240	BFRUCT4
AT1G12244	AT1G12244
AT1G12270	HOP1
AT1G12290	AT1G12290
AT1G12300	AT1G12300
AT1G12310	CML13
AT1G12320	AT1G12320
AT1G12330	AT1G12330
AT1G12350	PPCS1
AT1G12370	PHR1
AT1G12380	AT1G12380
AT1G12400	AT1G12400
AT1G12411	AT1G12411
AT1G12423	AT1G12423
AT1G12430	ARK3
AT1G12440	SAP1
AT1G12460	AT1G12460
AT1G12470	AT1G12470
AT1G12490	AT1G12490
AT1G12500	AT1G12500
AT1G12520	CCS
AT1G12530	AT1G12530
AT1G12550	HPR3
AT1G12560	EXPA7
AT1G12580	PEPKR1
AT1G12610	DREB1F
AT1G12640	LPLAT1
AT1G12670	AT1G12670
AT1G12680	PEPKR2
AT1G12710	P2A12
AT1G12730	AT1G12730
AT1G12740	CYP87A2
AT1G12750	RBL6
AT1G12770	RH47
AT1G12780	UGE1
AT1G12800	AT1G12800
AT1G12820	AFB3
AT1G12830	AT1G12830
AT1G12845	AT1G12845
AT1G12900	GAPA2
AT1G12910	LWD1
AT1G12940	NRT2.5
AT1G12950	RSH2
AT1G12960	AT1G12960
AT1G12980	ESR1
AT1G12990	AT1G12990
AT1G13000	AT1G13000
AT1G13020	EIF4B2
AT1G13040	AT1G13040
AT1G13060	PBE1
AT1G13080	CYP71B2
AT1G13090	CYP71B28
AT1G13100	CYP71B29
AT1G13110	CYP71B7
AT1G13130	AT1G13130
AT1G13140	CYP86C3
AT1G13145	AT1G13145
AT1G13170	ORP1D
AT1G13180	ARP3
AT1G13190	AT1G13190
AT1G13195	AT1G13195
AT1G13200	AT1G13200
AT1G13210	ALA11
AT1G13220	CRWN2
AT1G13230	PII-2
AT1G13240	AT1G13240
AT1G13250	GATL3
AT1G13260	RAV1
AT1G13280	AOC4
AT1G13300	HRS1
AT1G13310	AT1G13310
AT1G13340	AT1G13340
AT1G13350	AT1G13350
AT1G13360	AT1G13360
AT1G13370	AT1G13370
AT1G13380	AT1G13380
AT1G13390	AT1G13390
AT1G13420	SOT8
AT1G13430	STO9
AT1G13440	GAPC2
AT1G13450	GT-1
AT1G13470	AT1G13470
AT1G13510	AT1G13510
AT1G13550	AT1G13550
AT1G13560	AAPT1
AT1G13570	AT1G13570
AT1G13590	PSK1
AT1G13605	AT1G13605
AT1G13620	RGF2
AT1G13635	AT1G13635
AT1G13640	PI4KG6
AT1G13650	AT1G13650
AT1G13670	AT1G13670
AT1G13690	ATE1
AT1G13700	PGL1
AT1G13710	CYP78A5
AT1G13740	AFP2
AT1G13750	PAP1
AT1G13770	RUS3
AT1G13780	AT1G13780
AT1G13800	AT1G13800
AT1G13830	AT1G13830
AT1G13850	AT1G13850
AT1G13860	QUL1
AT1G13880	AT1G13880
AT1G13900	PAP2
AT1G13930	AT1G13930
AT1G13940	AT1G13940
AT1G13950	ELF5A-1
AT1G13960	WRKY4
AT1G13970	AT1G13970
AT1G13980	GN
AT1G13990	AT1G13990
AT1G14000	VIK
AT1G14010	AT1G14010
AT1G14020	AT1G14020
AT1G14030	LSMT-L
AT1G14040	PHO1
AT1G14080	FUT6
AT1G14090	AT1G14090
AT1G14120	AT1G14120
AT1G14130	AT1G14130
AT1G14140	PUMP3
AT1G14160	AT1G14160
AT1G14170	AT1G14170
AT1G14182	AT1G14182
AT1G14200	AT1G14200
AT1G14210	AT1G14210
AT1G14220	AT1G14220
AT1G14230	APY4
AT1G14240	APY3
AT1G14250	APY5
AT1G14260	AT1G14260
AT1G14270	AT1G14270
AT1G14290	SBH2
AT1G14315	AT1G14315
AT1G14330	AT1G14330
AT1G14340	AT1G14340
AT1G14345	AT1G14345
AT1G14350	FLP
AT1G14360	UTR3
AT1G14370	APK2A
AT1G14380	IQD28
AT1G14400	UBC1
AT1G14410	WHY1
AT1G14420	AT59
AT1G14440	ZHD4
AT1G14450	AT1G14450
AT1G14460	F14L17.24
AT1G14490	AHL28
AT1G14510	AL7
AT1G14520	MIOX1
AT1G14530	THH1
AT1G14540	PER4
AT1G14549	AT1G14549
AT1G14560	AT1G14560
AT1G14570	PUX7
AT1G14580	IDD6
AT1G14590	AT1G14590
AT1G14600	AT1G14600
AT1G14620	DECOY
AT1G14640	AT1G14640
AT1G14650	AT1G14650
AT1G14660	NHX8
AT1G14685	BPC2
AT1G14686	AT1G14686
AT1G14687	ZHD14
AT1G14690	MAP65-7
AT1G14700	PAP3
AT1G14710	AT1G14710
AT1G14740	OBE3
AT1G14750	SDS
AT1G14770	AT1G14770
AT1G14780	AT1G14780
AT1G14820	AT1G14820
AT1G14830	DRP1C
AT1G14840	MAP70.4
AT1G14850	NUP155
AT1G14860	NUDT18
AT1G14870	PCR2
AT1G14880	PCR1
AT1G14890	AT1G14890
AT1G14910	AT1G14910
AT1G14920	GAI
AT1G14950	AT1G14950
AT1G14960	AT1G14960
AT1G14970	AT1G14970
AT1G14990	AT1G14990
AT1G15020	QSOX1
AT1G15040	AT1G15040
AT1G15060	AT1G15060
AT1G15080	LPP2
AT1G15090	AT1G15090
AT1G15100	RHA2A
AT1G15110	PSS1
AT1G15120	AT1G15120
AT1G15125	AT1G15125
AT1G15130	AT1G15130
AT1G15140	AT1G15140
AT1G15165	AT1G15165
AT1G15175	AT1G15175
AT1G15190	FLA19
AT1G15200	AT1G15200
AT1G15210	ABCG35
AT1G15220	CCMH
AT1G15230	AT1G15230
AT1G15250	RPL37A
AT1G15290	AT1G15290
AT1G15300	AT1G15300
AT1G15310	SRP-54A
AT1G15320	AT1G15320
AT1G15340	MBD10
AT1G15350	AT1G15350
AT1G15360	WIN1
AT1G15370	AT1G15370
AT1G15380	AT1G15380
AT1G15400	AT1G15400
AT1G15420	AT1G15420
AT1G15440	PWP2
AT1G15460	BOR4
AT1G15480	AT1G15480
AT1G15490	AT1G15490
AT1G15500	AATP2
AT1G15510	PCMP-H73
AT1G15520	ABCG40
AT1G15530	LECRKS1
AT1G15550	GA3OX1
AT1G15570	CYCA2-3
AT1G15580	IAA5
AT1G15640	AT1G15640
AT1G15650	AT1G15650
AT1G15670	AT1G15670
AT1G15690	AVP1
AT1G15720	TRFL5
AT1G15730	AT1G15730
AT1G15740	AT1G15740
AT1G15750	TPL
AT1G15757	AT1G15757
AT1G15760	AT1G15760
AT1G15780	MED15A
AT1G15790	AT1G15790
AT1G15800	AT1G15800
AT1G15820	LHCB6
AT1G15840	AT1G15840
AT1G15860	AT1G15860
AT1G15880	GOS11
AT1G15900	AT1G15900
AT1G15920	CAF1-2
AT1G15930	RPS12A
AT1G15940	AT1G15940
AT1G15950	CCR1
AT1G15960	NRAMP6
AT1G15970	AT1G15970
AT1G16000	AT1G16000
AT1G16010	MRS2-1
AT1G16030	HSP70-5
AT1G16060	ADAP
AT1G16100	AT1G16100
AT1G16130	WAKL2
AT1G16150	WAKL4
AT1G16170	AT1G16170
AT1G16190	RAD23A
AT1G16220	AT1G16220
AT1G16230	AT1G16230
AT1G16240	SYP51
AT1G16260	WAKL8
AT1G16280	RH36
AT1G16300	GAPCP2
AT1G16310	MTP10
AT1G16320	AT1G16320
AT1G16330	CYCB3
AT1G16340	KDSA2
AT1G16360	ALIS4
AT1G16370	45936
AT1G16380	CHX1
AT1G16410	CYP79F1
AT1G16420	AMC8
AT1G16445	AT1G16445
AT1G16460	STR2
AT1G16480	AT1G16480
AT1G16490	ATMYB58
AT1G16500	AT1G16500
AT1G16510	SAUR41
AT1G16515	AT1G16515
AT1G16530	LBD3
AT1G16570	AT1G16570
AT1G16610	SR45
AT1G16635	AT1G16635
AT1G16650	AT1G16650
AT1G16670	AT1G16670
AT1G16680	AT1G16680
AT1G16705	AT1G16705
AT1G16710	HAC12
AT1G16720	HCF173
AT1G16730	UP6
AT1G16750	AT1G16750
AT1G16760	AT1G16760
AT1G16770	AT1G16770
AT1G16780	VHP2
AT1G16820	AT1G16820
AT1G16830	AT1G16830
AT1G16840	AT1G16840
AT1G16850	AT1G16850
AT1G16870	AT1G16870
AT1G16890	UBC36
AT1G16900	ALG9
AT1G16910	LSH8
AT1G16916	AT1G16916
AT1G16920	RABA1B
AT1G16950	AT1G16950
AT1G17010	AT1G17010
AT1G17020	SRG1
AT1G17040	SHA
AT1G17050	SPS2
AT1G17060	CYP72C1
AT1G17090	AT1G17090
AT1G17120	CAT8
AT1G17130	AT1G17130
AT1G17140	ICR1
AT1G17147	VQ1
AT1G17150	AT1G17150
AT1G17170	GSTU24
AT1G17190	GSTU26
AT1G17200	AT1G17200
AT1G17210	ATILP1
AT1G17230	AT1G17230
AT1G17235	RTFL11
AT1G17285	AT1G17285
AT1G17290	ALAAT1
AT1G17300	AT1G17300
AT1G17310	AT1G17310
AT1G17340	SAC5
AT1G17345	AT1G17345
AT1G17360	AT1G17360
AT1G17370	UBP1B
AT1G17380	TIFY11A
AT1G17400	AT1G17400
AT1G17410	AT1G17410
AT1G17420	LOX3
AT1G17440	TAF12B
AT1G17450	AT1G17450
AT1G17460	TRFL3
AT1G17495	AT1G17495
AT1G17510	AT1G17510
AT1G17530	TIM23-1
AT1G17550	HAB2
AT1G17560	HLL
AT1G17590	NFYA8
AT1G17615	AT1G17615
AT1G17620	AT1G17620
AT1G17640	AT1G17640
AT1G17650	GLYR2
AT1G17665	AT1G17665
AT1G17690	NOF1
AT1G17710	AT1G17710
AT1G17720	PP2AB2
AT1G17744	AT1G17744
AT1G17750	PEPR2
AT1G17780	AT1G17780
AT1G17790	GTE5
AT1G17820	AT1G17820
AT1G17830	AT1G17830
AT1G17840	ABCG11
AT1G17850	STR8
AT1G17890	GER2
AT1G17920	HDG12
AT1G17940	AT1G17940
AT1G17960	AT1G17960
AT1G17980	PAPS1
AT1G18030	AT1G18030
AT1G18040	CDKD-3
AT1G18075	MIR159B
AT1G18080	RACK1A
AT1G18100	MFT
AT1G18120	AT1G18120
AT1G18140	LAC1
AT1G18150	MPK8
AT1G18170	FKBP17-2
AT1G18190	GC2
AT1G18191	AT1G18191
AT1G18200	RABA6B
AT1G18250	ATLP-1
AT1G18260	HRD3A
AT1G18270	AT1G18270
AT1G18280	AT1G18280
AT1G18290	AT1G18290
AT1G18300	NUDT4
AT1G18310	AT1G18310
AT1G18330	RVE7
AT1G18335	AT1G18335
AT1G18350	MKK7
AT1G18360	AT1G18360
AT1G18382	AT1G18382
AT1G18400	BEE1
AT1G18410	AT1G18410
AT1G18415	AT1G18415
AT1G18450	ARP4
AT1G18460	AT1G18460
AT1G18470	AT1G18470
AT1G18500	IPMS1
AT1G18560	AT1G18560
AT1G18570	MYB51
AT1G18580	GAUT11
AT1G18590	SOT17
AT1G18600	ATRBL12
AT1G18610	AT1G18610
AT1G18620	AT1G18620
AT1G18640	PSP
AT1G18650	PDCB3
AT1G18670	IBS1
AT1G18680	AT1G18680
AT1G18710	AtMYB47
AT1G18720	AT1G18720
AT1G18735	AT1G18735
AT1G18740	AT1G18740
AT1G18745	AT1G18745
AT1G18760	AT1G18760
AT1G18773	AT1G18773
AT1G18800	NRP2
AT1G18820	AT1G18820
AT1G18835	MIF3
AT1G18840	IQD30
AT1G18850	AT1G18850
AT1G18870	ICS2
AT1G18879	AT1G18879
AT1G18890	CPK10
AT1G18900	AT1G18900
AT1G18910	AT1G18910
AT1G18940	AT1G18940
AT1G18970	GLP1
AT1G18990	MYOB5
AT1G19000	AT1G19000
AT1G19010	AT1G19010
AT1G19020	AT1G19020
AT1G19030	AT1G19030
AT1G19050	ARR7
AT1G19086	AT1G19086
AT1G19110	AT1G19110
AT1G19140	AT1G19140
AT1G19170	AT1G19170
AT1G19180	TIFY10A
AT1G19210	ERF017
AT1G19220	ARF19
AT1G19230	RBOHE
AT1G19240	AT1G19240
AT1G19250	FMO1
AT1G19270	DA1
AT1G19290	AT1G19290
AT1G19300	GATL1
AT1G19310	AT1G19310
AT1G19330	AT1G19330
AT1G19350	BZR2
AT1G19360	AT1G19360
AT1G19370	AT1G19370
AT1G19373	AT1G19373
AT1G19394	AT1G19394
AT1G19400	AT1G19400
AT1G19430	AT1G19430
AT1G19440	KCS4
AT1G19450	AT1G19450
AT1G19460	AT1G19460
AT1G19464	MIR864A
AT1G19480	AT1G19480
AT1G19485	AT1G19485
AT1G19490	AT1G19490
AT1G19520	NFD5
AT1G19530	AT1G19530
AT1G19540	AT1G19540
AT1G19560	AT1G19560
AT1G19570	DHAR1
AT1G19600	AT1G19600
AT1G19610	PDF1.4
AT1G19630	CYP722A1
AT1G19640	JMT
AT1G19650	SFH4
AT1G19660	BBD2
AT1G19690	AT1G19690
AT1G19700	BLH10
AT1G19720	DYW7
AT1G19750	AT1G19750
AT1G19770	PUP14
AT1G19780	CNGC8
AT1G19800	TGD1
AT1G19810	AT1G19810
AT1G19830	AT1G19830
AT1G19835	FPP4
AT1G19840	AT1G19840
AT1G19850	ARF5
AT1G19870	IQD32
AT1G19880	AT1G19880
AT1G19900	AT1G19900
AT1G19910	VHA-C2
AT1G19920	APS2
AT1G19940	AtGH9B5
AT1G19950	HVA22H
AT1G19960	AT1G19960
AT1G19968	AT1G19968
AT1G19970	AT1G19970
AT1G20010	TUBB5
AT1G20020	LFNR2
AT1G20030	AT1G20030
AT1G20050	HYD1
AT1G20070	AT1G20070
AT1G20090	ARAC4
AT1G20100	AT1G20100
AT1G20130	APG
AT1G20140	ASK4
AT1G20170	AT1G20170
AT1G20190	EXPA11
AT1G20200	RPN3A
AT1G20220	AT1G20220
AT1G20225	AT1G20225
AT1G20250	AT1G20250
AT1G20270	P4H3
AT1G20290	AT1G20290
AT1G20300	AT1G20300
AT1G20310	AT1G20310
AT1G20330	SMT2
AT1G20340	DRT112
AT1G20360	AT1G20360
AT1G20370	AT1G20370
AT1G20375	AT1G20375
AT1G20380	AT1G20380
AT1G20410	AT1G20410
AT1G20440	COR47
AT1G20450	ERD10
AT1G20480	4CLL2
AT1G20490	AT1G20490
AT1G20500	AT1G20500
AT1G20510	4CLL5
AT1G20520	AT1G20520
AT1G20540	AT1G20540
AT1G20560	AAE1
AT1G20575	AT1G20575
AT1G20620	CAT3
AT1G20630	CAT1
AT1G20640	NLP4
AT1G20650	AT1G20650
AT1G20657	AT1G20657
AT1G20670	AT1G20670
AT1G20680	AT1G20680
AT1G20691	AT1G20691
AT1G20696	HMGB3
AT1G20700	WOX14
AT1G20740	AT1G20740
AT1G20760	AT1G20760
AT1G20770	AT1G20770
AT1G20790	AT1G20790
AT1G20810	FKBP18
AT1G20816	OEP21A
AT1G20820	AT1G20820
AT1G20823	ATL80
AT1G20840	MSSP1
AT1G20850	XCP2
AT1G20860	PHT1-8
AT1G20875	AT1G20875
AT1G20880	AT1G20880
AT1G20890	AT1G20890
AT1G20900	AHL27
AT1G20925	AT1G20925
AT1G20940	AT1G20940
AT1G20960	emb1507
AT1G20967	AT1G20967
AT1G20970	AT1G20970
AT1G20980	SPL14
AT1G20990	AT1G20990
AT1G21000	AT1G21000
AT1G21010	AT1G21010
AT1G21020	AT1G21020
AT1G21050	AT1G21050
AT1G21060	AT1G21060
AT1G21070	AT1G21070
AT1G21080	AT1G21080
AT1G21090	AT1G21090
AT1G21100	AT1G21100
AT1G21110	AT1G21110
AT1G21120	AT1G21120
AT1G21130	AT1G21130
AT1G21140	AT1G21140
AT1G21150	AT1G21150
AT1G21160	AT1G21160
AT1G21210	WAK4
AT1G21220	AT1G21220
AT1G21250	WAK1
AT1G21260	AT1G21260
AT1G21280	AT1G21280
AT1G21290	AT1G21290
AT1G21300	AT1G21300
AT1G21310	EXT3
AT1G21320	AT1G21320
AT1G21326	AT1G21326
AT1G21327	AT1G21327
AT1G21350	AT1G21350
AT1G21360	GLTP2
AT1G21370	AT1G21370
AT1G21380	AT1G21380
AT1G21400	F24J8.4
AT1G21410	SKP2A
AT1G21430	AT1G21430
AT1G21440	AT1G21440
AT1G21450	SCL1
AT1G21460	SWEET1
AT1G21470	AT1G21470
AT1G21475	AT1G21475
AT1G21480	AT1G21480
AT1G21500	AT1G21500
AT1G21520	AT1G21520
AT1G21525	AT1G21525
AT1G21528	AT1G21528
AT1G21540	AEE9
AT1G21550	CML44
AT1G21560	AT1G21560
AT1G21580	AT1G21580
AT1G21590	AT1G21590
AT1G21600	PTAC6
AT1G21620	APUM20
AT1G21630	AT1G21630
AT1G21640	NADK2
AT1G21650	SECA2
AT1G21660	AT1G21660
AT1G21670	AT1G21670
AT1G21695	AT1G21695
AT1G21730	AT1G21730
AT1G21738	AT1G21738
AT1G21750	PDIL1-1
AT1G21760	SKIP32
AT1G21770	AT1G21770
AT1G21790	AT1G21790
AT1G21830	AT1G21830
AT1G21835	AT1G21835
AT1G21850	sks8
AT1G21880	LYM1
AT1G21890	AT1G21890
AT1G21900	AT1G21900
AT1G21910	ERF012
AT1G21920	AT1G21920
AT1G21940	AT1G21940
AT1G21950	AT1G21950
AT1G21970	LEC1
AT1G21975	AT1G21975
AT1G21980	PIP5K1
AT1G21990	AT1G21990
AT1G22030	AT1G22030
AT1G22040	AT1G22040
AT1G22050	MUB6
AT1G22060	AT1G22060
AT1G22065	AT1G22065
AT1G22070	TGA3
AT1G22100	AT1G22100
AT1G22110	AT1G22110
AT1G22130	AT1G22130
AT1G22140	AT1G22140
AT1G22160	AT1G22160
AT1G22170	AT1G22170
AT1G22180	AT1G22180
AT1G22190	RAP2-13
AT1G22200	AT1G22200
AT1G22220	AT1G22220
AT1G22230	AT1G22230
AT1G22240	APUM8
AT1G22250	AT1G22250
AT1G22260	ZYP1A
AT1G22310	MBD8
AT1G22340	UGT85A7
AT1G22350	AT1G22350
AT1G22400	UGT85A1
AT1G22403	AT1G22403
AT1G22410	AT1G22410
AT1G22430	AT1G22430
AT1G22440	AT1G22440
AT1G22460	AT1G22460
AT1G22470	AT1G22470
AT1G22490	BHLH94
AT1G22500	ATL15
AT1G22510	AT1G22510
AT1G22520	AT1G22520
AT1G22530	PATL2
AT1G22540	NPF5.10
AT1G22550	NPF5.16
AT1G22570	NPF5.15
AT1G22600	AT1G22600
AT1G22610	AT1G22610
AT1G22640	MYB3
AT1G22650	INVD
AT1G22680	AT1G22680
AT1G22710	SUC2
AT1G22720	AT1G22720
AT1G22740	RABG3B
AT1G22750	AT1G22750
AT1G22760	PAB3
AT1G22767	AT1G22767
AT1G22790	AT1G22790
AT1G22800	AT1G22800
AT1G22810	ERF019
AT1G22870	AT1G22870
AT1G22882	AT1G22882
AT1G22885	AT1G22885
AT1G22890	AT1G22890
AT1G22900	DIR11
AT1G22920	CSN5B
AT1G22930	AT1G22930
AT1G22940	TH1
AT1G22950	AT1G22950
AT1G22985	ERF069
AT1G22990	HIPP22
AT1G23000	AT1G23000
AT1G23010	LPR1
AT1G23020	FRO3
AT1G23030	PUB11
AT1G23040	AT1G23040
AT1G23050	AT1G23050
AT1G23060	AT1G23060
AT1G23070	AT1G23070
AT1G23074	AT1G23074
AT1G23080	PIN7
AT1G23090	SULTR3
AT1G23100	AT1G23100
AT1G23110	AT1G23110
AT1G23140	AT1G23140
AT1G23145	AT1G23145
AT1G23149	CPuORF29
AT1G23170	AT1G23170
AT1G23190	PGM3
AT1G23200	PME6
AT1G23201	AT1G23201
AT1G23205	AT1G23205
AT1G23210	AtGH9B6
AT1G23220	AT1G23220
AT1G23240	AT1G23240
AT1G23280	AT1G23280
AT1G23300	AT1G23300
AT1G23310	GGAT1
AT1G23330	AT1G23330
AT1G23340	AT1G23340
AT1G23360	MENG
AT1G23380	KNAT6
AT1G23390	AT1G23390
AT1G23400	CAF2
AT1G23440	AT1G23440
AT1G23450	AT1G23450
AT1G23465	AT1G23465
AT1G23480	CSLA3
AT1G23490	ARF2-A
AT1G23510	AT1G23510
AT1G23530	AT1G23530
AT1G23540	PERK12
AT1G23560	AT1G23560
AT1G23640	AT1G23640
AT1G23700	AT1G23700
AT1G23710	AT1G23710
AT1G23730	BCA3
AT1G23740	AT1G23740
AT1G23770	AT1G23770
AT1G23780	SKIP22
AT1G23810	AT1G23810
AT1G23820	SPDS1
AT1G23850	AT1G23850
AT1G23860	RSZ21
AT1G23870	TPS9
AT1G23880	AT1G23880
AT1G23890	AT1G23890
AT1G23950	AT1G23950
AT1G23960	AT1G23960
AT1G23970	AT1G23970
AT1G23980	ATL47
AT1G23990	AT1G23990
AT1G24010	AT1G24010
AT1G24020	MLP423
AT1G24040	AT1G24040
AT1G24080	AT1G24080
AT1G24095	AT1G24095
AT1G24100	UGT74B1
AT1G24120	ATJ16
AT1G24130	AT1G24130
AT1G24145	AT1G24145
AT1G24147	AT1G24147
AT1G24148	AT1G24148
AT1G24150	ATFH4
AT1G24160	AT1G24160
AT1G24170	GATL8
AT1G24180	IAR4
AT1G24240	AT1G24240
AT1G24250	AT1G24250
AT1G24260	45903
AT1G24265	AT1G24265
AT1G24267	AT1G24267
AT1G24300	AT1G24300
AT1G24320	GCS2
AT1G24340	EMB260
AT1G24350	AT1G24350
AT1G24405	AT1G24405
AT1G24430	AT1G24430
AT1G24440	AT1G24440
AT1G24450	NFD2
AT1G24480	AT1G24480
AT1G24490	ALB3L1
AT1G24510	CCT5
AT1G24530	AT1G24530
AT1G24540	CYP86C1
AT1G24560	AT1G24560
AT1G24575	AT1G24575
AT1G24580	AT1G24580
AT1G24600	AT1G24600
AT1G24620	CML25
AT1G24625	ZFP7
AT1G24706	THO2
AT1G24733	AT1G24733
AT1G24764	MAP70.2
AT1G24792	AT1G24792
AT1G25220	ASB1
AT1G25250	IDD16
AT1G25260	AT1G25260
AT1G25275	AT1G25275
AT1G25280	TULP10
AT1G25310	MEE8
AT1G25320	AT1G25320
AT1G25340	AT1G25340
AT1G25350	OVA9
AT1G25370	AT1G25370
AT1G25375	AT1G25375
AT1G25390	AT1G25390
AT1G25410	IPT6
AT1G25420	AT1G25420
AT1G25422	AT1G25422
AT1G25425	CLE43
AT1G25440	COL16
AT1G25450	KCS5
AT1G25460	AT1G25460
AT1G25480	ALMT4
AT1G25490	PP2AA1
AT1G25500	AT1G25500
AT1G25520	AT1G25520
AT1G25530	AT1G25530
AT1G25540	MED25
AT1G25560	TEM1
AT1G25570	AT1G25570
AT1G25580	NAC008
AT1G26090	AT1G26090
AT1G26100	CYB561D
AT1G26110	DCP5
AT1G26130	ALA12
AT1G26140	AT1G26140
AT1G26150	PERK10
AT1G26160	AT1G26160
AT1G26190	AT1G26190
AT1G26200	AT1G26200
AT1G26208	AT1G26208
AT1G26218	AT1G26218
AT1G26230	CPN60B4
AT1G26250	AT1G26250
AT1G26260	BHLH76
AT1G26270	PI4KG5
AT1G26290	AT1G26290
AT1G26300	AT1G26300
AT1G26380	AT1G26380
AT1G26390	AT1G26390
AT1G26410	AT1G26410
AT1G26420	AT1G26420
AT1G26440	UPS5
AT1G26460	AT1G26460
AT1G26490	AT1G26490
AT1G26540	AT1G26540
AT1G26550	AT1G26550
AT1G26558	AT1G26558
AT1G26560	BGLU40
AT1G26570	UGD1
AT1G26590	AT1G26590
AT1G26600	CLE9
AT1G26620	AT1G26620
AT1G26660	AT1G26660
AT1G26670	VTI12
AT1G26690	AT1G26690
AT1G26720	AT1G26720
AT1G26730	PHO1-H7
AT1G26740	AT1G26740
AT1G26761	AT1G26761
AT1G26762	AT1G26762
AT1G26770	EXPA10
AT1G26773	AT1G26773
AT1G26790	AT1G26790
AT1G26797	AT1G26797
AT1G26800	AT1G26800
AT1G26810	B3GALT15
AT1G26830	CUL3A
AT1G26850	AT1G26850
AT1G26870	FEZ
AT1G26880	RPL34A
AT1G26900	PCMP-E54
AT1G26916	AT1G26916
AT1G26920	AT1G26920
AT1G26930	AT1G26930
AT1G26940	CYP23
AT1G26945	PRE6
AT1G26950	AT1G26950
AT1G26960	ATHB-23
AT1G26970	AT1G26970
AT1G27000	AT1G27000
AT1G27020	AT1G27020
AT1G27030	AT1G27030
AT1G27050	ATHB54
AT1G27070	AT1G27070
AT1G27090	AT1G27090
AT1G27100	AT1G27100
AT1G27120	B3GALT17
AT1G27130	GSTU13
AT1G27170	AT1G27170
AT1G27180	AT1G27180
AT1G27190	AT1G27190
AT1G27200	AT1G27200
AT1G27210	AT1G27210
AT1G27213	AT1G27213
AT1G27290	AT1G27290
AT1G27320	AHK3
AT1G27330	AT1G27330
AT1G27340	FBX6
AT1G27350	AT1G27350
AT1G27360	SPL11
AT1G27370	SPL10
AT1G27385	AT1G27385
AT1G27390	TOM20-2
AT1G27440	IRX10
AT1G27460	NPGR1
AT1G27470	AT1G27470
AT1G27500	AT1G27500
AT1G27510	EX2
AT1G27540	AT1G27540
AT1G27560	AT1G27560
AT1G27580	AT1G27580
AT1G27590	AT1G27590
AT1G27600	IRX9H
AT1G27630	CYCT1-3
AT1G27640	AT1G27640
AT1G27650	U2AF35A
AT1G27660	BHLH110
AT1G27670	AT1G27670
AT1G27680	APL2
AT1G27690	AT1G27690
AT1G27700	AT1G27700
AT1G27720	TAF4
AT1G27730	ZAT10
AT1G27750	AT1G27750
AT1G27760	SAT32
AT1G27770	ACA1
AT1G27820	CAF1-3
AT1G27840	ATCSA-1
AT1G27850	AT1G27850
AT1G27890	CAF1-4
AT1G27900	AT1G27900
AT1G27910	PUB45
AT1G27930	AT1G27930
AT1G27940	ABCB13
AT1G27960	ECT9
AT1G27980	DPL1
AT1G28007	AT1G28007
AT1G28010	ABCB14
AT1G28050	COL15
AT1G28070	AT1G28070
AT1G28080	AT1G28080
AT1G28090	AT1G28090
AT1G28100	AT1G28100
AT1G28110	SCPL45
AT1G28130	GH3.17
AT1G28135	AT1G28135
AT1G28170	SOT7
AT1G28180	AT1G28180
AT1G28190	AT1G28190
AT1G28200	FIP1
AT1G28230	PUP1
AT1G28240	AT1G28240
AT1G28250	AT1G28250
AT1G28260	SMG7L
AT1G28280	VQ4
AT1G28290	AGP31
AT1G28310	DOF1.4
AT1G28320	DEG15
AT1G28330	DYL1
AT1G28340	AtRLP4
AT1G28360	ERF12
AT1G28370	ERF11
AT1G28375	AT1G28375
AT1G28380	NSL1
AT1G28390	AT1G28390
AT1G28395	AT1G28395
AT1G28400	AT1G28400
AT1G28410	AT1G28410
AT1G28430	CYP705A24
AT1G28440	HSL1
AT1G28447	AT1G28447
AT1G28480	GRXC9
AT1G28490	SYP61
AT1G28500	AT1G28500
AT1G28520	VOZ1
AT1G28530	AT1G28530
AT1G28560	SRD2
AT1G28570	AT1G28570
AT1G28580	AT1G28580
AT1G28590	AT1G28590
AT1G28591	AT1G28591
AT1G28600	AT1G28600
AT1G28610	AT1G28610
AT1G28620	AT1G28620
AT1G28640	AT1G28640
AT1G28650	AT1G28650
AT1G28680	AT1G28680
AT1G28690	PCMP-E34
AT1G28760	AT1G28760
AT1G28810	AT1G28810
AT1G28960	NUDT15
AT1G29000	AT1G29000
AT1G29010	AT1G29010
AT1G29020	AT1G29020
AT1G29025	AT1G29025
AT1G29030	AT1G29030
AT1G29050	TBL38
AT1G29060	AT1G29060
AT1G29071	AT1G29071
AT1G29100	AT1G29100
AT1G29120	AT1G29120
AT1G29150	RPN6
AT1G29160	DOF1.5
AT1G29170	SCAR3
AT1G29179	AT1G29179
AT1G29195	AT1G29195
AT1G29230	CIPK18
AT1G29240	AT1G29240
AT1G29250	AT1G29250
AT1G29270	AT1G29270
AT1G29280	WRKY65
AT1G29290	AT1G29290
AT1G29300	UNE1
AT1G29310	AT1G29310
AT1G29330	ERD2A
AT1G29340	PUB17
AT1G29350	AT1G29350
AT1G29357	AT1G29357
AT1G29390	COR413IM2
AT1G29400	ML5
AT1G29410	PAI3
AT1G29418	AT1G29418
AT1G29420	SAUR61
AT1G29440	SAUR63
AT1G29460	SAUR65
AT1G29470	AT1G29470
AT1G29510	SAUR67
AT1G29530	AT1G29530
AT1G29600	AT1G29600
AT1G29640	AT1G29640
AT1G29660	AT1G29660
AT1G29670	AT1G29670
AT1G29680	AT1G29680
AT1G29690	CAD1
AT1G29700	AT1G29700
AT1G29715	AT1G29715
AT1G29720	RFK1
AT1G29760	AT1G29760
AT1G29785	AT1G29785
AT1G29810	AT1G29810
AT1G29840	AT1G29840
AT1G29850	AT1G29850
AT1G29860	WRKY71
AT1G29870	AT1G29870
AT1G29880	GLYRS-1
AT1G29900	CARB
AT1G29910	LHCB1.2
AT1G29920	LHCB1.2
AT1G29930	LHCB1.3
AT1G29940	NRPA2
AT1G29960	AT1G29960
AT1G29970	RPL18AA
AT1G29980	AT1G29980
AT1G30016	AT1G30016
AT1G30020	AT1G30020
AT1G30040	GA2OX2
AT1G30050	AT1G30050
AT1G30070	AT1G30070
AT1G30080	AT1G30080
AT1G30100	NCED5
AT1G30110	NUDT25
AT1G30120	PDH-E1 BETA
AT1G30130	AT1G30130
AT1G30135	TIFY5A
AT1G30180	AT1G30180
AT1G30190	AT1G30190
AT1G30200	AT1G30200
AT1G30210	TCP24
AT1G30250	AT1G30250
AT1G30260	AT1G30260
AT1G30270	CIPK23
AT1G30280	AT1G30280
AT1G30290	AT1G30290
AT1G30310	AT1G30310
AT1G30320	AT1G30320
AT1G30330	ARF6
AT1G30340	AT1G30340
AT1G30350	AT1G30350
AT1G30360	ERD4
AT1G30370	AT1G30370
AT1G30400	ABCC1
AT1G30410	ATMRP13
AT1G30440	AT1G30440
AT1G30450	CCC1
AT1G30460	CPSF30
AT1G30475	AT1G30475
AT1G30490	ATHB-9
AT1G30500	NFYA7
AT1G30510	RFNR2
AT1G30530	UGT78D1
AT1G30540	AT1G30540
AT1G30550	AT1G30550
AT1G30570	HERK2
AT1G30590	AT1G30590
AT1G30600	AT1G30600
AT1G30610	EMB2279
AT1G30620	MUR4
AT1G30650	WRKY14
AT1G30660	T5I8.11
AT1G30680	T5I8.13
AT1G30690	PATL4
AT1G30700	AT1G30700
AT1G30720	AT1G30720
AT1G30755	AT1G30755
AT1G30757	AT1G30757
AT1G30760	AT1G30760
AT1G30780	AT1G30780
AT1G30810	JMJ18
AT1G30820	AT1G30820
AT1G30825	ARPC2A
AT1G30835	SADHU1-2
AT1G30840	PUP4
AT1G30850	RSH4
AT1G30860	AT1G30860
AT1G30880	AT1G30880
AT1G30900	VSR6
AT1G30935	AT1G30935
AT1G31010	OSB4
AT1G31030	AT1G31030
AT1G31040	AT1G31040
AT1G31070	GLCNAC1PUT1
AT1G31120	POT10
AT1G31130	AT1G31130
AT1G31150	AT1G31150
AT1G31160	HINT 2
AT1G31170	SRX
AT1G31173	MIR167D
AT1G31175	AT1G31175
AT1G31180	IMDH1
AT1G31230	AKHSDH1
AT1G31258	AT1G31258
AT1G31280	AGO2
AT1G31290	AGO3
AT1G31300	AT1G31300
AT1G31310	AT1G31310
AT1G31320	LBD4
AT1G31330	PSAF
AT1G31340	RUB1
AT1G31350	SKIP25
AT1G31355	AT1G31355
AT1G31358	AT1G31358
AT1G31410	AT1G31410
AT1G31450	AT1G31450
AT1G31470	NFD4
AT1G31530	AT1G31530
AT1G31540	AT1G31540
AT1G31550	AT1G31550
AT1G31580	ECS1
AT1G31650	ROPGEF14
AT1G31710	AT1G31710
AT1G31720	AT1G31720
AT1G31730	AT1G31730
AT1G31760	AT1G31760
AT1G31780	AT1G31780
AT1G31790	PCMP-A1
AT1G31812	ACBP6
AT1G31817	NFD3
AT1G31830	AT1G31830
AT1G31835	AT1G31835
AT1G31850	AT1G31850
AT1G31860	HISN2
AT1G31880	BRX
AT1G31910	AT1G31910
AT1G31920	PCMP-H11
AT1G31940	AT1G31940
AT1G31950	TPS29
AT1G31960	AT1G31960
AT1G31970	RH5
AT1G31990	AT1G31990
AT1G32045	AT1G32045
AT1G32049	AT1G32049
AT1G32060	PRK
AT1G32070	NSI
AT1G32080	PLGG1
AT1G32090	AT1G32090
AT1G32100	PRR1
AT1G32120	AT1G32120
AT1G32150	bZIP68
AT1G32170	XTH30
AT1G32180	CSLD6
AT1G32190	AT1G32190
AT1G32200	ATS1
AT1G32210	DAD1
AT1G32230	RCD1
AT1G32240	KAN2
AT1G32260	AT1G32260
AT1G32290	AT1G32290
AT1G32310	AT1G32310
AT1G32320	AT1G32320
AT1G32330	HSFA1D
AT1G32340	NHL8
AT1G32350	AOX3
AT1G32360	AT1G32360
AT1G32361	AT1G32361
AT1G32380	PRS2
AT1G32385	AT1G32385
AT1G32400	TOM2A
AT1G32410	AT1G32410
AT1G32415	PCMP-E56
AT1G32440	PKP3
AT1G32450	NPF7.3
AT1G32460	AT1G32460
AT1G32470	GDH3
AT1G32500	ABCI7
AT1G32520	AT1G32520
AT1G32530	MIP1
AT1G32540	LOL1
AT1G32550	FdC1
AT1G32570	AT1G32570
AT1G32610	AT1G32610
AT1G32640	MYC2
AT1G32650	AT1G32650
AT1G32670	AT1G32670
AT1G32690	AT1G32690
AT1G32700	AT1G32700
AT1G32710	AT1G32710
AT1G32730	AT1G32730
AT1G32740	AT1G32740
AT1G32760	AT1G32760
AT1G32770	AT1G32770
AT1G32780	AT1G32780
AT1G32860	AT1G32860
AT1G32870	NAC13
AT1G32890	AT1G32890
AT1G32900	GBSS1
AT1G32910	AT1G32910
AT1G32928	AT1G32928
AT1G32930	B3GALT6
AT1G32940	SBT3.5
AT1G32960	SBT3.3
[truncated: 13,921 more rows]

## Sheet: VAL2 target genes 
ID	name
AT1G01010	NAC001
AT1G01020	ARV1
AT1G01030	NGA3
AT1G01040	DCL1
AT1G01050	PPA1
AT1G01060	LHY
AT1G01070	AT1G01070
AT1G01080	AT1G01080
AT1G01110	IQD18
AT1G01120	KCS1
AT1G01130	AT1G01130
AT1G01140	CIPK9
AT1G01180	AT1G01180
AT1G01183	MIR165A
AT1G01190	CYP78A8
AT1G01225	AT1G01225
AT1G01240	AT1G01240
AT1G01250	ERF023
AT1G01260	BHLH13
AT1G01300	AT1G01300
AT1G01310	AT1G01310
AT1G01320	AT1G01320
AT1G01340	CNGC10
AT1G01360	PYL9
AT1G01380	ETC1
AT1G01390	UGT72B2
AT1G01420	UGT72B3
AT1G01430	TBL25
AT1G01440	AT1G01440
AT1G01453	AT1G01453
AT1G01470	LEA14
AT1G01480	ACS2
AT1G01490	AT1G01490
AT1G01510	AN
AT1G01520	RVE3
AT1G01540	AT1G01540
AT1G01550	BPS1
AT1G01560	MPK11
AT1G01570	AT1G01570
AT1G01580	FRO2
AT1G01590	FRO1
AT1G01600	CYP86A4
AT1G01610	GPAT4
AT1G01620	PIP1-3
AT1G01650	SPPL4
AT1G01670	PUB56
AT1G01680	PUB54
AT1G01695	AT1G01695
AT1G01700	ROPGEF2
AT1G01710	AT1G01710
AT1G01720	NAC002
AT1G01760	AT1G01760
AT1G01800	AT1G01800
AT1G01830	AT1G01830
AT1G01860	PFC1
AT1G01890	AT1G01890
AT1G01910	AT1G01910
AT1G01930	AT1G01930
AT1G01950	ARK2
AT1G01990	AT1G01990
AT1G02020	AT1G02020
AT1G02030	ZAT1
AT1G02040	AT1G02040
AT1G02065	SPL8
AT1G02070	AT1G02070
AT1G02074	AT1G02074
AT1G02080	AT1G02080
AT1G02170	AMC1
AT1G02180	AT1G02180
AT1G02205	CER1
AT1G02210	AT1G02210
AT1G02220	NAC003
AT1G02228	AT1G02228
AT1G02230	NAC004
AT1G02250	NAC005
AT1G02270	AT1G02270
AT1G02300	AT1G02300
AT1G02305	AT1G02305
AT1G02310	MAN1
AT1G02330	AT1G02330
AT1G02335	GL22
AT1G02340	HFR1
AT1G02360	AT1G02360
AT1G02380	AT1G02380
AT1G02390	GPAT2
AT1G02391	AT1G02391
AT1G02400	GA2OX6
AT1G02420	AT1G02420
AT1G02450	NIMIN-1
AT1G02460	AT1G02460
AT1G02475	AT1G02475
AT1G02490	AT1G02490
AT1G02500	SAM1
AT1G02520	ABCB11
AT1G02560	CLPP5
AT1G02600	AT1G02600
AT1G02610	AT1G02610
AT1G02630	ETN8
AT1G02640	BXL2
AT1G02650	AT1G02650
AT1G02660	AT1G02660
AT1G02690	IMPA6
AT1G02700	AT1G02700
AT1G02720	GATL5
AT1G02770	AT1G02770
AT1G02810	PME7
AT1G02840	SR34
AT1G02850	BGLU11
AT1G02860	BAH1
AT1G02880	TPK1
AT1G02890	AT1G02890
AT1G02900	RALF1
AT1G02910	LPA1
AT1G03000	PEX6
AT1G03022	AT1G03022
AT1G03030	AT1G03030
AT1G03040	BHLH7
AT1G03060	SPI
AT1G03070	AT1G03070
AT1G03080	NET1D
AT1G03106	AT1G03106
AT1G03120	ATRAB28
AT1G03130	PSAD2
AT1G03140	AT1G03140
AT1G03160	FZL
AT1G03170	FAF2
AT1G03200	AT1G03200
AT1G03220	AT1G03220
AT1G03230	AT1G03230
AT1G03240	AT1G03240
AT1G03250	AT1G03250
AT1G03290	AT1G03290
AT1G03300	ATDUF1
AT1G03350	AT1G03350
AT1G03365	RF4
AT1G03370	AT1G03370
AT1G03400	AT1G03400
AT1G03410	2A6
AT1G03440	AT1G03440
AT1G03457	BRN2
AT1G03470	NET3A
AT1G03510	PCMP-E3
AT1G03520	AT1G03520
AT1G03550	SCAMP2
AT1G03590	PPC6-6
AT1G03620	AT1G03620
AT1G03680	ATHM1
AT1G03710	AT1G03710
AT1G03720	AT1G03720
AT1G03730	AT1G03730
AT1G03743	AT1G03743
AT1G03760	AT1G03760
AT1G03800	ERF10
AT1G03840	MGP
AT1G03850	GRXS13
AT1G03860	PHB2
AT1G03880	CRB
AT1G03900	ATNAP4
AT1G03905	ABCI19
AT1G03930	ADK1
AT1G03935	AT1G03935
AT1G03950	VPS2.3
AT1G03970	GBF4
AT1G03980	PCS2
AT1G03990	FAO1
AT1G04000	AT1G04000
AT1G04010	PSAT
AT1G04030	AT1G04030
AT1G04040	AT1G04040
AT1G04070	TOM9-1
AT1G04090	AT1G04090
AT1G04100	IAA10
AT1G04120	ABCC5
AT1G04140	AT1G04140
AT1G04150	AT1G04150
AT1G04170	EIF2 GAMMA
AT1G04171	AT1G04171
AT1G04180	YUC9
AT1G04210	AT1G04210
AT1G04220	KCS17
AT1G04240	IAA3
AT1G04250	IAA17
AT1G04260	PRA1D
AT1G04270	RPS15A
AT1G04280	AT1G04280
AT1G04300	AT1G04300
AT1G04310	ERS2
AT1G04320	AT1G04320
AT1G04330	AT1G04330
AT1G04350	AT1G04350
AT1G04360	ATL1
AT1G04370	ERF14
AT1G04400	CRY2
AT1G04410	MDH1
AT1G04430	AT1G04430
AT1G04440	CKL13
AT1G04490	AT1G04490
AT1G04500	AT1G04500
AT1G04520	CRRSP3
AT1G04530	TPR4
AT1G04550	IAA12
AT1G04570	AT1G04570
AT1G04590	AT1G04590
AT1G04610	YUC3
AT1G04630	MEE4
AT1G04650	AT1G04650
AT1G04670	AT1G04670
AT1G04680	AT1G04680
AT1G04684	AT1G04684
AT1G04690	KAB1
AT1G04710	KAT1
AT1G04720	AT1G04720
AT1G04750	VAMP721
AT1G04770	AT1G04770
AT1G04780	AT1G04780
AT1G04820	TUBA4
AT1G04920	SPS3
AT1G04960	AT1G04960
AT1G04980	PDIL2-2
AT1G04985	AT1G04985
AT1G04990	AT1G04990
AT1G05000	AT1G05000
AT1G05010	ACO4
AT1G05061	AT1G05061
AT1G05070	AT1G05070
AT1G05090	AT1G05090
AT1G05100	MAPKKK18
AT1G05120	AT1G05120
AT1G05135	AT1G05135
AT1G05140	ARASP2
AT1G05150	AT1G05150
AT1G05170	B3GALT2
AT1G05200	GLR3.4
AT1G05230	HDG2
AT1G05240	PER1
AT1G05260	PER3
AT1G05270	AT1G05270
AT1G05300	ZIP5
AT1G05340	AT1G05340
AT1G05350	AT1G05350
AT1G05370	AT1G05370
AT1G05380	AT1G05380
AT1G05385	PSB27-2
AT1G05410	AT1G05410
AT1G05420	OFP12
AT1G05460	SDE3
AT1G05470	CVP2
AT1G05490	CLSY3
AT1G05500	SYT5
AT1G05520	AT1G05520
AT1G05530	UGT75B2
AT1G05540	AT1G05540
AT1G05550	AT1G05550
AT1G05560	UGT75B1
AT1G05570	CALS1
AT1G05577	AT1G05577
AT1G05620	URH2
AT1G05630	5PTASE13
AT1G05640	AT1G05640
AT1G05650	AT1G05650
AT1G05680	UGT74E2
AT1G05710	AT1G05710
AT1G05750	PDE247
AT1G05785	AT1G05785
AT1G05790	AT1G05790
AT1G05800	DGL
AT1G05805	BHLH128
AT1G05810	ARA
AT1G05835	AT1G05835
AT1G05840	AT1G05840
AT1G05850	CTL1
AT1G05870	AT1G05870
AT1G05950	AT1G05950
AT1G05970	AT1G05970
AT1G06000	UGT89C1
AT1G06040	BBX24
AT1G06070	AT1G06070
AT1G06080	ADS1
AT1G06110	SKIP16
AT1G06130	GLX2-4
AT1G06148	AT1G06148
AT1G06149	CPuORF8
AT1G06160	ERF094
AT1G06170	BHLH89
AT1G06180	ATMYB13
AT1G06200	AT1G06200
AT1G06225	CLE3
AT1G06270	AT1G06270
AT1G06290	ACX3
AT1G06310	ACX3.2
AT1G06330	AT1G06330
AT1G06360	AT1G06360
AT1G06370	AT1G06370
AT1G06390	ASK9
AT1G06400	RABA1A
AT1G06410	TPS7
AT1G06450	CAF1-1
AT1G06460	ACD32.1
AT1G06475	AT1G06475
AT1G06480	AT1G06480
AT1G06510	AT1G06510
AT1G06520	GPAT1
AT1G06530	PMD2
AT1G06570	PDS1
AT1G06590	APC5
AT1G06640	AT1G06640
AT1G06680	PSBP1
AT1G06700	PTI11
AT1G06740	AT1G06740
AT1G06760	AT1G06760
AT1G06770	DRIP1
AT1G06780	GAUT6
AT1G06800	PLA-I{gamma}1
AT1G06840	AT1G06840
AT1G06850	AtbZIP52
AT1G06870	TPP2
AT1G06900	AT1G06900
AT1G06923	AT1G06923
AT1G06980	AT1G06980
AT1G06990	AT1G06990
AT1G07020	AT1G07020
AT1G07030	AT1G07030
AT1G07040	AT1G07040
AT1G07090	LSH6
AT1G07100	AT1G07100
AT1G07110	FKFBP
AT1G07128	AT1G07128
AT1G07135	AT1G07135
AT1G07160	AT1G07160
AT1G07175	AT1G07175
AT1G07180	NDA1
AT1G07200	AT1G07200
AT1G07220	AT1G07220
AT1G07230	NPC1
AT1G07280	AT1G07280
AT1G07290	GONST2
AT1G07310	AT1G07310
AT1G07350	SR45A
AT1G07360	AT1G07360
AT1G07390	AtRLP1
AT1G07400	HSP17.8
AT1G07420	SMO2-2
AT1G07430	AIP1
AT1G07480	AT1G07480
AT1G07485	AT1G07485
AT1G07500	AT1G07500
AT1G07520	SCL31
AT1G07530	SCL14
AT1G07540	TRP5
AT1G07560	AT1G07560
AT1G07570	APK1A
AT1G07580	AT1G07580
AT1G07590	AT1G07590
AT1G07620	TRM32
AT1G07630	PLL5
AT1G07640	DOF1.1
AT1G07645	ATDSI-1VOC
AT1G07670	ECA4
AT1G07710	AT1G07710
AT1G07720	KCS3
AT1G07760	AT1G07760
AT1G07770	RPS15AA
AT1G07780	PAI1
AT1G07810	ECA1
AT1G07820	AT1G07820
AT1G07870	AT1G07870
AT1G07885	AT1G07885
AT1G07900	LBD1
AT1G07910	ATRNL
AT1G07930	A3
AT1G07940	A3
AT1G07980	NF-YC10
AT1G07990	AT1G07990
AT1G08010	GATA11
AT1G08030	TPST
AT1G08040	AT1G08040
AT1G08080	ACA7
AT1G08090	NRT2.1
AT1G08100	NRT2.2
AT1G08115	AT1G08115
AT1G08130	LIG1
AT1G08165	AT1G08165
AT1G08170	AT1G08170
AT1G08190	VPS41
AT1G08200	AXS2
AT1G08210	AT1G08210
AT1G08230	GAT1
AT1G08250	ADT6
AT1G08280	AT1G08280
AT1G08290	WIP3
AT1G08310	AT1G08310
AT1G08315	AT1G08315
AT1G08320	TGA9
AT1G08340	ROPGAP5
AT1G08380	PSAO
AT1G08400	MAG2L
AT1G08420	BSL2
AT1G08430	ALMT1
AT1G08440	ALMT2
AT1G08450	CRT3
AT1G08470	SSL3
AT1G08490	NFS2
AT1G08500	ENODL18
AT1G08510	FATB
AT1G08540	SIGB
AT1G08570	ACHT4
AT1G08630	THA1
AT1G08640	CJD1
AT1G08680	AGD14
AT1G08695	SCRL3
AT1G08720	EDR1
AT1G08760	AT1G08760
AT1G08800	MYOB1
AT1G08810	MYB60
AT1G08820	PVA22
AT1G08860	BON3
AT1G08870	AT1G08870
AT1G08900	SUGTL3
AT1G08910	AT1G08910
AT1G08920	SUGTL2
AT1G08930	ERD6
AT1G08940	AT1G08940
AT1G08950	AT1G08950
AT1G08970	NFYC9
AT1G08990	GUX5
AT1G09010	EBM
AT1G09040	AT1G09040
AT1G09070	SRC2
AT1G09090	RBOHB
AT1G09130	CLPR3
AT1G09155	PP2B15
AT1G09160	AT1G09160
AT1G09176	AT1G09176
AT1G09200	HTR2
AT1G09210	CRT2
AT1G09230	SNRNP65
AT1G09240	NAS3
AT1G09250	BHLH149
AT1G09270	IMPA4
AT1G09310	AT1G09310
AT1G09320	AT1G09320
AT1G09350	GOLS3
AT1G09380	AT1G09380
AT1G09390	AT1G09390
AT1G09415	NIMIN-3
AT1G09420	G6PD4
AT1G09440	AT1G09440
AT1G09460	AT1G09460
AT1G09470	AT1G09470
AT1G09490	AT1G09490
AT1G09500	AT1G09500
AT1G09520	AT1G09520
AT1G09530	PIF3
AT1G09540	MYB61
AT1G09560	GLP4
AT1G09570	PHYA
AT1G09580	AT1G09580
AT1G09630	RABA2A
AT1G09645	AT1G09645
AT1G09660	AT1G09660
AT1G09750	AT1G09750
AT1G09760	U2A'
AT1G09780	PGM1
AT1G09800	AT1G09800
AT1G09810	ECT11
AT1G09812	AT1G09812
AT1G09815	POLD4
AT1G09840	ASK10
AT1G09880	AT1G09880
AT1G09920	AT1G09920
AT1G09935	AT1G09935
AT1G09940	HEMA2
AT1G09970	LRR XI-23
AT1G09980	AT1G09980
AT1G09995	AT1G09995
AT1G10020	AT1G10020
AT1G10040	AT1G10040
AT1G10060	BCAT1
AT1G10070	BCAT2
AT1G10090	AT1G10090
AT1G10110	AT1G10110
AT1G10120	BHLH74
AT1G10130	ECA3
AT1G10140	AT1G10140
AT1G10170	NFXL1
AT1G10180	EXO84C
AT1G10200	WLIM1
AT1G10220	AT1G10220
AT1G10230	ASK18
AT1G10240	FRS11
AT1G10270	GRP23
AT1G10280	AT1G10280
AT1G10290	DRP2A
AT1G10300	AT1G10300
AT1G10340	AT1G10340
AT1G10350	AT1G10350
AT1G10360	GSTU18
AT1G10380	AT1G10380
AT1G10385	EXO84A
AT1G10390	NUP98A
AT1G10400	UGT90A2
AT1G10410	AT1G10410
AT1G10417	AT1G10417
AT1G10430	PP2A2
AT1G10460	GLP7
AT1G10470	ARR4
AT1G10480	ZFP5
AT1G10490	AT1G10490
AT1G10500	ISCA
AT1G10530	AT1G10530
AT1G10550	XTH33
AT1G10585	AT1G10585
AT1G10588	AT1G10588
AT1G10590	AT1G10590
AT1G10640	AT1G10640
AT1G10650	AT1G10650
AT1G10652	AT1G10652
AT1G10657	AT1G10657
AT1G10660	AT1G10660
AT1G10670	ACLA-1
AT1G10682	AT1G10682
AT1G10690	AT1G10690
AT1G10700	PRS3
AT1G10710	PHS1
AT1G10740	AT1G10740
AT1G10745	ESF1.2
AT1G10747	ESF1.1
AT1G10750	AT1G10750
AT1G10760	GWD1
AT1G10820	AT1G10820
AT1G10870	AGD4
AT1G10880	AT1G10880
AT1G10890	AT1G10890
AT1G10900	PIP5K7
AT1G10920	LOV1
AT1G10940	SRK2A
AT1G10960	FD1
AT1G10990	AT1G10990
AT1G11000	MLO4
AT1G11040	AT1G11040
AT1G11060	AT1G11060
AT1G11080	SCPL31
AT1G11090	AT1G11090
AT1G11100	AT1G11100
AT1G11112	AT1G11112
AT1G11120	AT1G11120
AT1G11125	AT1G11125
AT1G11130	SUB
AT1G11160	AT1G11160
AT1G11170	AT1G11170
AT1G11175	AT1G11175
AT1G11185	AT1G11185
AT1G11210	AT1G11210
AT1G11220	AT1G11220
AT1G11230	AT1G11230
AT1G11240	AT1G11240
AT1G11250	SYP125
AT1G11260	STP1
AT1G11280	AT1G11280
AT1G11310	MLO2
AT1G11320	AT1G11320
AT1G11330	AT1G11330
AT1G11362	AT1G11362
AT1G11370	PME56
AT1G11390	AT1G11390
AT1G11420	ATDUF2
AT1G11440	AT1G11440
AT1G11460	AT1G11460
AT1G11530	CXXS1
AT1G11540	AT1G11540
AT1G11545	XTH8
AT1G11580	PME18
AT1G11590	PME19
AT1G11600	CYP77B1
AT1G11630	AT1G11630
AT1G11655	AT1G11655
AT1G11660	HSP70-16
AT1G11670	AT1G11670
AT1G11680	CYP51G1
AT1G11690	AT1G11690
AT1G11700	AT1G11700
AT1G11720	SS3
AT1G11735	MIR171B
AT1G11740	AT1G11740
AT1G11770	AT1G11770
AT1G11790	ADT1
AT1G11820	AT1G11820
AT1G11840	ATGLX1
AT1G11850	AT1G11850
AT1G11900	AT1G11900
AT1G11910	APA1
AT1G11920	AT1G11920
AT1G11940	AT1G11940
AT1G11950	AT1G11950
AT1G11960	AT1G11960
AT1G12000	PFP-BETA1
AT1G12020	AT1G12020
AT1G12030	AT1G12030
AT1G12060	BAG5
AT1G12070	AT1G12070
AT1G12080	AT1G12080
AT1G12090	ELP
AT1G12100	AT1G12100
AT1G12110	NPF6.3
AT1G12120	AT1G12120
AT1G12140	FMOGS-OX5
AT1G12190	AT1G12190
AT1G12200	AT1G12200
AT1G12210	RFL1
AT1G12211	AT1G12211
AT1G12240	BFRUCT4
AT1G12244	AT1G12244
AT1G12270	HOP1
AT1G12290	AT1G12290
AT1G12320	AT1G12320
AT1G12330	AT1G12330
AT1G12370	PHR1
AT1G12380	AT1G12380
AT1G12411	AT1G12411
AT1G12420	ACR8
AT1G12423	AT1G12423
AT1G12430	ARK3
AT1G12440	SAP1
AT1G12460	AT1G12460
AT1G12490	AT1G12490
AT1G12500	AT1G12500
AT1G12530	AT1G12530
AT1G12550	HPR3
AT1G12560	EXPA7
AT1G12580	PEPKR1
AT1G12610	DREB1F
AT1G12640	LPLAT1
AT1G12670	AT1G12670
AT1G12700	AT1G12700
AT1G12710	P2A12
AT1G12740	CYP87A2
AT1G12750	RBL6
AT1G12780	UGE1
AT1G12800	AT1G12800
AT1G12805	AT1G12805
AT1G12820	AFB3
AT1G12845	AT1G12845
AT1G12950	RSH2
AT1G12960	RPL27AA
AT1G12980	ESR1
AT1G12990	AT1G12990
AT1G13020	EIF4B2
AT1G13080	CYP71B2
AT1G13090	CYP71B28
AT1G13100	CYP71B29
AT1G13110	CYP71B7
AT1G13145	AT1G13145
AT1G13180	ARP3
AT1G13195	AT1G13195
AT1G13210	ALA11
AT1G13240	AT1G13240
AT1G13245	RTFL17
AT1G13250	GATL3
AT1G13260	RAV1
AT1G13280	AOC4
AT1G13300	HRS1
AT1G13310	AT1G13310
AT1G13340	AT1G13340
AT1G13360	AT1G13360
AT1G13370	AT1G13370
AT1G13380	AT1G13380
AT1G13390	AT1G13390
AT1G13430	STO9
AT1G13440	GAPC2
AT1G13450	GT-1
AT1G13470	AT1G13470
AT1G13510	AT1G13510
AT1G13550	AT1G13550
AT1G13560	AAPT1
AT1G13570	AT1G13570
AT1G13590	PSK1
AT1G13605	AT1G13605
AT1G13635	AT1G13635
AT1G13640	PI4KG6
AT1G13670	AT1G13670
AT1G13690	ATE1
AT1G13700	PGL1
AT1G13710	CYP78A5
AT1G13740	AFP2
AT1G13750	PAP1
AT1G13830	AT1G13830
AT1G13860	QUL1
AT1G13900	PAP2
AT1G13930	AT1G13930
AT1G13940	AT1G13940
AT1G13950	ELF5A-1
AT1G13960	WRKY4
AT1G13970	AT1G13970
AT1G13980	GN
AT1G13990	AT1G13990
AT1G14000	VIK
AT1G14010	AT1G14010
AT1G14040	PHO1
AT1G14070	FUT7
AT1G14080	FUT6
AT1G14090	AT1G14090
AT1G14120	AT1G14120
AT1G14130	AT1G14130
AT1G14170	AT1G14170
AT1G14182	SCRL28
AT1G14200	AT1G14200
AT1G14210	AT1G14210
AT1G14220	AT1G14220
AT1G14230	APY4
AT1G14240	APY3
AT1G14260	AT1G14260
AT1G14270	AT1G14270
AT1G14290	SBH2
AT1G14315	AT1G14315
AT1G14330	AT1G14330
AT1G14340	AT1G14340
AT1G14345	AT1G14345
AT1G14350	FLP
AT1G14360	UTR3
AT1G14370	APK2A
AT1G14380	IQD28
AT1G14390	AT1G14390
AT1G14400	UBC1
AT1G14430	AT1G14430
AT1G14440	ZHD4
AT1G14450	AT1G14450
AT1G14460	F14L17.24
AT1G14490	AHL28
AT1G14510	AL7
AT1G14520	MIOX1
AT1G14530	THH1
AT1G14540	PER4
AT1G14549	AT1G14549
AT1G14560	AT1G14560
AT1G14570	PUX7
AT1G14580	IDD6
AT1G14590	AT1G14590
AT1G14600	AT1G14600
AT1G14620	DECOY
AT1G14640	AT1G14640
AT1G14650	AT1G14650
AT1G14660	NHX8
AT1G14685	BPC2
AT1G14687	ZHD14
AT1G14690	MAP65-7
AT1G14700	PAP3
AT1G14710	AT1G14710
AT1G14720	XTH28
AT1G14740	OBE3
AT1G14750	SDS
AT1G14770	AT1G14770
AT1G14780	AT1G14780
AT1G14820	AT1G14820
AT1G14830	DRP1C
AT1G14840	MAP70.4
AT1G14860	NUDT18
AT1G14870	PCR2
AT1G14890	AT1G14890
AT1G14900	HMGA
AT1G14920	GAI
AT1G14950	AT1G14950
AT1G14960	AT1G14960
AT1G14970	AT1G14970
AT1G14990	AT1G14990
AT1G15020	QSOX1
AT1G15040	AT1G15040
AT1G15060	AT1G15060
AT1G15080	LPP2
AT1G15090	AT1G15090
AT1G15100	RHA2A
AT1G15110	PSS1
AT1G15120	AT1G15120
AT1G15125	AT1G15125
AT1G15140	AT1G15140
AT1G15165	AT1G15165
AT1G15175	AT1G15175
AT1G15190	FLA19
AT1G15210	ABCG35
AT1G15220	CCMH
AT1G15230	AT1G15230
AT1G15250	RPL37A
AT1G15290	AT1G15290
AT1G15300	AT1G15300
AT1G15340	MBD10
AT1G15350	AT1G15350
AT1G15360	WIN1
AT1G15370	AT1G15370
AT1G15380	AT1G15380
AT1G15400	AT1G15400
AT1G15420	AT1G15420
AT1G15440	PWP2
AT1G15460	BOR4
AT1G15480	AT1G15480
AT1G15490	AT1G15490
AT1G15520	ABCG40
AT1G15530	LECRKS1
AT1G15550	GA3OX1
AT1G15570	CYCA2-3
AT1G15580	IAA5
AT1G15640	AT1G15640
AT1G15670	AT1G15670
AT1G15690	AVP1
AT1G15710	TYRAAT2
AT1G15720	TRFL5
AT1G15730	AT1G15730
AT1G15740	AT1G15740
AT1G15750	TPL
AT1G15757	AT1G15757
AT1G15760	AT1G15760
AT1G15800	AT1G15800
AT1G15820	LHCB6
AT1G15840	AT1G15840
AT1G15860	AT1G15860
AT1G15880	GOS11
AT1G15940	AT1G15940
AT1G15950	CCR1
AT1G15960	NRAMP6
AT1G15970	AT1G15970
AT1G16000	AT1G16000
AT1G16010	MRS2-1
AT1G16030	HSP70-5
AT1G16060	ADAP
AT1G16100	AT1G16100
AT1G16120	WAKL1
AT1G16130	WAKL2
AT1G16150	WAKL4
AT1G16170	AT1G16170
AT1G16190	RAD23A
AT1G16220	AT1G16220
AT1G16240	SYP51
AT1G16260	WAKL8
AT1G16300	GAPCP2
AT1G16310	MTP10
AT1G16360	ALIS4
AT1G16370	45936
AT1G16410	CYP79F1
AT1G16460	STR2
AT1G16490	ATMYB58
AT1G16500	AT1G16500
AT1G16510	SAUR41
AT1G16515	AT1G16515
AT1G16530	LBD3
AT1G16660	AT1G16660
AT1G16670	AT1G16670
AT1G16705	AT1G16705
AT1G16720	HCF173
AT1G16730	UP6
AT1G16750	AT1G16750
AT1G16820	AT1G16820
AT1G16840	AT1G16840
AT1G16850	AT1G16850
AT1G16870	AT1G16870
AT1G16890	UBC36
AT1G16900	ALG9
AT1G16916	AT1G16916
AT1G16920	RABA1B
AT1G16950	AT1G16950
AT1G17040	SHA
AT1G17050	SPS2
AT1G17060	CYP72C1
AT1G17090	AT1G17090
AT1G17110	UBP15
AT1G17130	AT1G17130
AT1G17140	ICR1
AT1G17147	VQ1
AT1G17150	AT1G17150
AT1G17170	GSTU24
AT1G17180	GSTU25
AT1G17190	GSTU26
AT1G17200	AT1G17200
AT1G17210	ATILP1
AT1G17230	AT1G17230
AT1G17235	RTFL11
AT1G17250	AtRLP3
AT1G17290	ALAAT1
AT1G17300	AT1G17300
AT1G17310	AT1G17310
AT1G17330	AT1G17330
AT1G17340	SAC5
AT1G17345	AT1G17345
AT1G17360	AT1G17360
AT1G17370	UBP1B
AT1G17380	TIFY11A
AT1G17400	AT1G17400
AT1G17410	AT1G17410
AT1G17420	LOX3
AT1G17430	AT1G17430
AT1G17440	TAF12B
AT1G17450	AT1G17450
AT1G17460	TRFL3
AT1G17495	AT1G17495
AT1G17500	ALA4
AT1G17510	AT1G17510
AT1G17530	TIM23-1
AT1G17550	HAB2
AT1G17560	HLL
AT1G17590	NFYA8
AT1G17615	AT1G17615
AT1G17620	AT1G17620
AT1G17665	AT1G17665
AT1G17710	AT1G17710
AT1G17720	PP2AB2
AT1G17744	AT1G17744
AT1G17750	PEPR2
AT1G17830	AT1G17830
AT1G17850	STR8
AT1G17890	GER2
AT1G17920	HDG12
AT1G17940	AT1G17940
AT1G17980	PAPS1
AT1G18040	CDKD-3
AT1G18075	MIR159B
AT1G18080	RACK1A
AT1G18100	MFT
AT1G18120	AT1G18120
AT1G18140	LAC1
AT1G18150	MPK8
AT1G18180	AT1G18180
AT1G18190	GC2
AT1G18191	AT1G18191
AT1G18200	RABA6B
AT1G18250	ATLP-1
AT1G18260	HRD3A
AT1G18270	AT1G18270
AT1G18290	AT1G18290
AT1G18300	NUDT4
AT1G18330	RVE7
AT1G18335	AT1G18335
AT1G18350	MKK7
AT1G18360	AT1G18360
AT1G18382	AT1G18382
AT1G18400	BEE1
AT1G18410	AT1G18410
AT1G18415	AT1G18415
AT1G18460	AT1G18460
AT1G18470	AT1G18470
AT1G18500	IPMS1
AT1G18560	AT1G18560
AT1G18570	MYB51
AT1G18580	GAUT11
AT1G18590	SOT17
AT1G18610	AT1G18610
AT1G18620	AT1G18620
AT1G18640	PSP
AT1G18670	IBS1
AT1G18710	AtMYB47
AT1G18720	AT1G18720
AT1G18735	AT1G18735
AT1G18740	AT1G18740
AT1G18773	AT1G18773
AT1G18800	NRP2
AT1G18820	AT1G18820
AT1G18835	MIF3
AT1G18840	IQD30
AT1G18850	AT1G18850
AT1G18870	ICS2
AT1G18890	CPK10
AT1G18900	AT1G18900
AT1G18910	AT1G18910
AT1G18940	AT1G18940
AT1G18970	GLP1
AT1G18990	MYOB5
AT1G19000	AT1G19000
AT1G19010	AT1G19010
AT1G19020	AT1G19020
AT1G19030	AT1G19030
AT1G19050	ARR7
AT1G19080	TTN10
AT1G19110	AT1G19110
AT1G19140	AT1G19140
AT1G19170	AT1G19170
AT1G19180	TIFY10A
AT1G19220	ARF19
AT1G19230	RBOHE
AT1G19240	AT1G19240
AT1G19250	FMO1
AT1G19270	DA1
AT1G19290	AT1G19290
AT1G19300	GATL1
AT1G19310	AT1G19310
AT1G19330	AT1G19330
AT1G19350	BZR2
AT1G19360	AT1G19360
AT1G19370	AT1G19370
AT1G19376	AT1G19376
AT1G19400	AT1G19400
AT1G19430	AT1G19430
AT1G19440	KCS4
AT1G19450	AT1G19450
AT1G19460	AT1G19460
AT1G19480	AT1G19480
AT1G19485	AT1G19485
AT1G19490	AT1G19490
AT1G19530	AT1G19530
AT1G19540	AT1G19540
AT1G19570	DHAR1
AT1G19600	AT1G19600
AT1G19610	PDF1.4
AT1G19630	CYP722A1
AT1G19640	JMT
AT1G19650	SFH4
AT1G19660	BBD2
AT1G19700	BLH10
AT1G19720	DYW7
AT1G19730	TRX4
AT1G19750	AT1G19750
AT1G19770	PUP14
AT1G19800	TGD1
AT1G19830	AT1G19830
AT1G19835	FPP4
AT1G19840	AT1G19840
AT1G19850	ARF5
AT1G19870	IQD32
AT1G19910	VHA-C2
AT1G19920	APS2
AT1G19940	AtGH9B5
AT1G19950	HVA22H
AT1G19960	AT1G19960
AT1G19968	AT1G19968
AT1G19970	AT1G19970
AT1G20010	TUBB5
AT1G20030	AT1G20030
AT1G20070	AT1G20070
AT1G20080	SYT2
AT1G20090	ARAC4
AT1G20100	AT1G20100
AT1G20170	AT1G20170
AT1G20190	EXPA11
AT1G20200	RPN3A
AT1G20220	AT1G20220
AT1G20250	AT1G20250
AT1G20270	P4H3
AT1G20310	AT1G20310
AT1G20330	SMT2
AT1G20340	DRT112
AT1G20370	AT1G20370
AT1G20375	MIR394A
AT1G20380	AT1G20380
AT1G20410	AT1G20410
AT1G20440	COR47
AT1G20450	ERD10
AT1G20480	4CLL2
AT1G20490	AT1G20490
AT1G20500	4CLL4
AT1G20510	4CLL5
AT1G20540	AT1G20540
AT1G20560	AAE1
AT1G20575	AT1G20575
AT1G20620	CAT3
AT1G20630	CAT1
AT1G20640	NLP4
AT1G20650	AT1G20650
AT1G20657	AT1G20657
AT1G20670	AT1G20670
AT1G20691	AT1G20691
AT1G20696	HMGB3
AT1G20700	WOX14
AT1G20816	OEP21A
AT1G20820	AT1G20820
AT1G20823	ATL80
AT1G20840	MSSP1
AT1G20850	XCP2
AT1G20860	PHT1-8
AT1G20880	AT1G20880
AT1G20890	AT1G20890
AT1G20900	AHL27
AT1G20930	CDKB2-2
AT1G20967	AT1G20967
AT1G20980	SPL14
AT1G20990	AT1G20990
AT1G21000	AT1G21000
AT1G21010	AT1G21010
AT1G21020	AT1G21020
AT1G21050	AT1G21050
AT1G21060	AT1G21060
AT1G21070	AT1G21070
AT1G21080	AT1G21080
AT1G21090	AT1G21090
AT1G21100	AT1G21100
AT1G21110	AT1G21110
AT1G21120	AT1G21120
AT1G21130	AT1G21130
AT1G21140	AT1G21140
AT1G21210	WAK4
AT1G21250	WAK1
AT1G21260	AT1G21260
AT1G21290	AT1G21290
AT1G21300	AT1G21300
AT1G21310	EXT3
AT1G21320	AT1G21320
AT1G21326	AT1G21326
AT1G21350	AT1G21350
AT1G21360	GLTP2
AT1G21370	AT1G21370
AT1G21380	AT1G21380
AT1G21390	emb2170
AT1G21400	F24J8.4
AT1G21410	SKP2A
AT1G21430	YUC11
AT1G21450	SCL1
AT1G21460	SWEET1
AT1G21475	AT1G21475
AT1G21480	AT1G21480
AT1G21500	AT1G21500
AT1G21520	AT1G21520
AT1G21525	AT1G21525
AT1G21528	AT1G21528
AT1G21540	AEE9
AT1G21550	CML44
AT1G21580	AT1G21580
AT1G21590	AT1G21590
AT1G21600	PTAC6
AT1G21620	APUM20
AT1G21640	NADK2
AT1G21660	AT1G21660
AT1G21670	AT1G21670
AT1G21695	AT1G21695
AT1G21730	AT1G21730
AT1G21738	AT1G21738
AT1G21750	PDIL1-1
AT1G21760	SKIP32
AT1G21770	AT1G21770
AT1G21790	AT1G21790
AT1G21830	AT1G21830
AT1G21880	LYM1
AT1G21890	AT1G21890
AT1G21900	AT1G21900
AT1G21910	ERF012
AT1G21920	AT1G21920
AT1G21950	AT1G21950
AT1G21975	AT1G21975
AT1G21980	PIP5K1
AT1G21990	AT1G21990
AT1G22020	SHM6
AT1G22030	AT1G22030
AT1G22040	AT1G22040
AT1G22050	MUB6
AT1G22060	AT1G22060
AT1G22065	AT1G22065
AT1G22070	TGA3
AT1G22100	AT1G22100
AT1G22110	AT1G22110
AT1G22130	AGL104
AT1G22140	AT1G22140
AT1G22160	AT1G22160
AT1G22170	AT1G22170
AT1G22180	AT1G22180
AT1G22190	RAP2-13
AT1G22220	AT1G22220
AT1G22230	AT1G22230
AT1G22250	AT1G22250
AT1G22260	ZYP1A
AT1G22310	MBD8
AT1G22350	AT1G22350
AT1G22360	UGT85A2
AT1G22400	UGT85A1
AT1G22403	AT1G22403
AT1G22410	AT1G22410
AT1G22430	AT1G22430
AT1G22440	AT1G22440
AT1G22460	AT1G22460
AT1G22470	AT1G22470
AT1G22490	BHLH94
AT1G22500	ATL15
AT1G22510	AT1G22510
AT1G22520	AT1G22520
AT1G22530	PATL2
AT1G22540	NPF5.10
AT1G22550	NPF5.16
AT1G22570	NPF5.15
AT1G22600	AT1G22600
AT1G22610	AT1G22610
AT1G22640	MYB3
AT1G22650	INVD
AT1G22690	GASA9
AT1G22710	SUC2
AT1G22720	AT1G22720
AT1G22740	RABG3B
AT1G22767	AT1G22767
AT1G22790	AT1G22790
AT1G22810	ERF019
AT1G22882	AT1G22882
AT1G22885	AT1G22885
AT1G22890	AT1G22890
AT1G22900	DIR11
AT1G22910	AT1G22910
AT1G22920	CSN5B
AT1G22930	AT1G22930
AT1G22985	ERF069
AT1G22990	HIPP22
AT1G23000	AT1G23000
AT1G23010	LPR1
AT1G23020	FRO3
AT1G23030	PUB11
AT1G23040	AT1G23040
AT1G23050	AT1G23050
AT1G23060	AT1G23060
AT1G23070	AT1G23070
AT1G23074	AT1G23074
AT1G23080	PIN7
AT1G23090	SULTR3
AT1G23100	AT1G23100
AT1G23110	AT1G23110
AT1G23140	AT1G23140
AT1G23149	CPuORF29
AT1G23170	AT1G23170
AT1G23190	PGM3
AT1G23205	AT1G23205
AT1G23210	AtGH9B6
AT1G23220	AT1G23220
AT1G23310	GGAT1
AT1G23330	AT1G23330
AT1G23340	AT1G23340
AT1G23360	MENG
AT1G23380	KNAT6
AT1G23390	AT1G23390
AT1G23400	CAF2
AT1G23440	AT1G23440
AT1G23480	CSLA3
AT1G23490	ARF2-A
AT1G23510	AT1G23510
AT1G23560	AT1G23560
AT1G23700	AT1G23700
AT1G23710	AT1G23710
AT1G23730	BCA3
AT1G23740	AT1G23740
AT1G23760	JP630
AT1G23780	SKIP22
AT1G23820	SPDS1
AT1G23850	AT1G23850
AT1G23860	RSZ21
AT1G23880	AT1G23880
AT1G23890	AT1G23890
AT1G23910	AT1G23910
AT1G23960	AT1G23960
AT1G23970	AT1G23970
AT1G23980	ATL47
AT1G23990	AT1G23990
AT1G24000	AT1G24000
AT1G24080	AT1G24080
AT1G24095	AT1G24095
AT1G24100	UGT74B1
AT1G24120	ATJ16
AT1G24130	AT1G24130
AT1G24145	AT1G24145
AT1G24147	AT1G24147
AT1G24148	AT1G24148
AT1G24150	ATFH4
AT1G24160	AT1G24160
AT1G24170	GATL8
AT1G24180	IAR4
AT1G24260	45903
AT1G24265	AT1G24265
AT1G24340	EMB260
AT1G24350	AT1G24350
AT1G24405	AT1G24405
AT1G24440	AT1G24440
AT1G24460	AT1G24460
AT1G24480	AT1G24480
AT1G24530	AT1G24530
AT1G24540	CYP86C1
AT1G24575	AT1G24575
AT1G24600	AT1G24600
AT1G24620	CML25
AT1G24625	ZFP7
AT1G24764	MAP70.2
AT1G24792	AT1G24792
AT1G25220	ASB1
AT1G25230	PAP4
AT1G25240	AT1G25240
AT1G25250	IDD16
AT1G25260	AT1G25260
AT1G25275	AT1G25275
AT1G25280	TULP10
AT1G25310	MEE8
AT1G25320	AT1G25320
AT1G25340	MYB116
AT1G25350	OVA9
AT1G25370	AT1G25370
AT1G25375	AT1G25375
AT1G25390	AT1G25390
AT1G25410	IPT6
AT1G25420	AT1G25420
AT1G25422	AT1G25422
AT1G25425	CLE43
AT1G25440	COL16
AT1G25450	KCS5
AT1G25460	AT1G25460
AT1G25480	ALMT4
AT1G25500	AT1G25500
AT1G25530	AT1G25530
AT1G25540	MED25
AT1G25560	TEM1
AT1G25570	AT1G25570
AT1G25580	NAC008
AT1G26090	AT1G26090
AT1G26100	CYB561D
AT1G26150	PERK10
AT1G26200	AT1G26200
AT1G26208	AT1G26208
AT1G26230	CPN60B4
AT1G26260	BHLH76
AT1G26270	PI4KG5
AT1G26290	AT1G26290
AT1G26380	AT1G26380
AT1G26390	AT1G26390
AT1G26410	AT1G26410
AT1G26420	AT1G26420
AT1G26440	UPS5
AT1G26490	AT1G26490
AT1G26540	AT1G26540
AT1G26558	AT1G26558
AT1G26560	BGLU40
AT1G26570	UGD1
AT1G26580	AT1G26580
AT1G26590	AT1G26590
AT1G26600	CLE9
AT1G26620	AT1G26620
AT1G26690	AT1G26690
AT1G26720	AT1G26720
AT1G26730	PHO1-H7
AT1G26770	EXPA10
AT1G26773	AT1G26773
AT1G26790	DOF1.3
AT1G26797	AT1G26797
AT1G26800	AT1G26800
AT1G26850	AT1G26850
AT1G26900	PCMP-E54
AT1G26916	AT1G26916
AT1G26920	AT1G26920
AT1G26921	AT1G26921
AT1G26930	AT1G26930
AT1G26940	CYP23
AT1G26945	PRE6
AT1G26950	AT1G26950
AT1G26970	AT1G26970
AT1G27000	AT1G27000
AT1G27020	AT1G27020
AT1G27030	AT1G27030
AT1G27050	ATHB54
AT1G27070	AT1G27070
AT1G27100	AT1G27100
AT1G27120	B3GALT17
AT1G27130	GSTU13
AT1G27170	AT1G27170
AT1G27180	AT1G27180
AT1G27190	AT1G27190
AT1G27200	AT1G27200
AT1G27210	AT1G27210
AT1G27290	AT1G27290
AT1G27330	AT1G27330
AT1G27350	AT1G27350
AT1G27360	SPL11
AT1G27370	SPL10
AT1G27385	AT1G27385
AT1G27440	IRX10
AT1G27460	NPGR1
AT1G27470	AT1G27470
AT1G27510	EX2
AT1G27540	AT1G27540
AT1G27600	IRX9H
AT1G27630	CYCT1-3
AT1G27640	AT1G27640
AT1G27650	U2AF35A
AT1G27660	BHLH110
AT1G27670	AT1G27670
AT1G27690	AT1G27690
AT1G27720	TAF4
AT1G27740	BHLH54
AT1G27750	AT1G27750
AT1G27760	SAT32
AT1G27770	ACA1
AT1G27840	ATCSA-1
AT1G27850	AT1G27850
AT1G27910	PUB45
AT1G27930	AT1G27930
AT1G27940	ABCB13
AT1G27950	LTPG1
AT1G27980	DPL1
AT1G28007	AT1G28007
AT1G28050	COL15
AT1G28070	AT1G28070
AT1G28080	AT1G28080
AT1G28090	AT1G28090
AT1G28100	AT1G28100
AT1G28110	SCPL45
AT1G28120	AT1G28120
AT1G28130	GH3.17
AT1G28135	AT1G28135
AT1G28170	SOT7
AT1G28180	RH44
AT1G28190	AT1G28190
AT1G28200	FIP1
AT1G28230	PUP1
AT1G28250	AT1G28250
AT1G28260	SMG7L
AT1G28280	VQ4
AT1G28290	AGP31
AT1G28310	DOF1.4
AT1G28320	DEG15
AT1G28330	DYL1
AT1G28340	AtRLP4
AT1G28360	ERF12
AT1G28370	ERF11
AT1G28375	AT1G28375
AT1G28380	NSL1
AT1G28390	AT1G28390
AT1G28395	AT1G28395
AT1G28400	AT1G28400
AT1G28410	AT1G28410
AT1G28430	CYP705A24
AT1G28440	HSL1
AT1G28447	AT1G28447
AT1G28480	GRXC9
AT1G28570	AT1G28570
AT1G28580	AT1G28580
AT1G28591	AT1G28591
AT1G28600	AT1G28600
AT1G28610	AT1G28610
AT1G28620	AT1G28620
AT1G28630	AT1G28630
AT1G28640	AT1G28640
AT1G28650	AT1G28650
AT1G28670	ARAB-1
AT1G28690	PCMP-E34
AT1G28760	AT1G28760
AT1G28960	NUDT15
AT1G29020	AT1G29020
AT1G29050	TBL38
AT1G29060	AT1G29060
AT1G29120	AT1G29120
AT1G29150	RPN6
AT1G29160	DOF1.5
AT1G29170	SCAR3
AT1G29179	AT1G29179
AT1G29195	AT1G29195
AT1G29230	CIPK18
AT1G29240	AT1G29240
AT1G29250	AT1G29250
AT1G29270	AT1G29270
AT1G29280	WRKY65
AT1G29290	AT1G29290
AT1G29300	UNE1
AT1G29310	AT1G29310
AT1G29330	ERD2A
AT1G29340	PUB17
AT1G29390	COR413IM2
AT1G29400	ML5
AT1G29440	SAUR63
AT1G29470	AT1G29470
AT1G29530	AT1G29530
AT1G29600	AT1G29600
AT1G29640	AT1G29640
AT1G29650	AT1G29650
AT1G29660	AT1G29660
AT1G29670	AT1G29670
AT1G29680	AT1G29680
AT1G29690	CAD1
AT1G29760	AT1G29760
AT1G29810	AT1G29810
AT1G29840	AT1G29840
AT1G29850	AT1G29850
AT1G29880	GLYRS-1
AT1G29900	CARB
AT1G29920	LHCB1.2
AT1G29930	LHCB1.3
AT1G29960	AT1G29960
AT1G29980	AT1G29980
AT1G30010	AT1G30010
AT1G30016	AT1G30016
AT1G30020	AT1G30020
AT1G30040	GA2OX2
AT1G30050	AT1G30050
AT1G30080	AT1G30080
AT1G30100	NCED5
AT1G30110	NUDT25
AT1G30120	PDH-E1 BETA
AT1G30135	TIFY5A
AT1G30190	AT1G30190
AT1G30200	AT1G30200
AT1G30220	INT2
AT1G30250	AT1G30250
AT1G30260	AT1G30260
AT1G30270	CIPK23
AT1G30280	AT1G30280
AT1G30290	AT1G30290
AT1G30310	AT1G30310
AT1G30320	AT1G30320
AT1G30330	ARF6
AT1G30340	AT1G30340
AT1G30350	AT1G30350
AT1G30360	ERD4
AT1G30370	AT1G30370
AT1G30400	ABCC1
AT1G30410	ATMRP13
AT1G30450	CCC1
AT1G30475	AT1G30475
AT1G30490	ATHB-9
AT1G30500	NFYA7
AT1G30510	RFNR2
AT1G30530	UGT78D1
AT1G30550	AT1G30550
AT1G30570	HERK2
AT1G30610	EMB2279
AT1G30620	MUR4
AT1G30650	WRKY14
AT1G30660	T5I8.11
AT1G30690	PATL4
AT1G30700	AT1G30700
AT1G30720	AT1G30720
AT1G30730	AT1G30730
AT1G30740	AT1G30740
AT1G30755	AT1G30755
AT1G30757	AT1G30757
AT1G30760	AT1G30760
AT1G30780	AT1G30780
AT1G30810	JMJ18
AT1G30820	AT1G30820
AT1G30825	ARPC2A
AT1G30835	SADHU1-2
AT1G30840	PUP4
AT1G30860	AT1G30860
AT1G30900	VSR6
AT1G31010	OSB4
AT1G31030	AT1G31030
AT1G31040	AT1G31040
AT1G31070	GLCNAC1PUT1
AT1G31120	POT10
AT1G31130	AT1G31130
AT1G31150	AT1G31150
AT1G31173	MIR167D
AT1G31290	AGO3
AT1G31310	AT1G31310
AT1G31320	LBD4
AT1G31330	PSAF
AT1G31350	SKIP25
AT1G31355	AT1G31355
AT1G31358	MIR404
AT1G31410	AT1G31410
AT1G31470	NFD4
AT1G31540	AT1G31540
AT1G31550	AT1G31550
AT1G31580	ECS1
AT1G31650	ROPGEF14
AT1G31660	AT1G31660
AT1G31710	AT1G31710
AT1G31720	AT1G31720
AT1G31730	AT1G31730
AT1G31760	AT1G31760
AT1G31772	AT1G31772
AT1G31780	AT1G31780
AT1G31790	PCMP-A1
AT1G31812	ACBP6
AT1G31830	AT1G31830
AT1G31835	AT1G31835
AT1G31850	AT1G31850
AT1G31860	HISN2
AT1G31880	BRX
AT1G31910	AT1G31910
AT1G31940	AT1G31940
AT1G32049	AT1G32049
AT1G32060	PRK
AT1G32090	AT1G32090
AT1G32100	PRR1
AT1G32120	AT1G32120
AT1G32150	bZIP68
AT1G32170	XTH30
AT1G32180	CSLD6
AT1G32190	AT1G32190
AT1G32200	ATS1
AT1G32210	DAD1
AT1G32230	RCD1
AT1G32240	KAN2
AT1G32290	AT1G32290
AT1G32340	NHL8
AT1G32360	AT1G32360
AT1G32380	PRS2
AT1G32400	TOM2A
AT1G32410	AT1G32410
AT1G32450	NPF7.3
AT1G32460	AT1G32460
AT1G32500	ABCI7
AT1G32530	MIP1
AT1G32540	LOL1
AT1G32550	FdC1
AT1G32610	AT1G32610
AT1G32640	MYC2
AT1G32650	AT1G32650
AT1G32670	AT1G32670
AT1G32680	AT1G32680
AT1G32690	AT1G32690
AT1G32700	AT1G32700
AT1G32710	AT1G32710
AT1G32730	AT1G32730
AT1G32740	AT1G32740
AT1G32760	AT1G32760
AT1G32770	NAC012
AT1G32780	AT1G32780
AT1G32860	AT1G32860
AT1G32900	GBSS1
AT1G32910	AT1G32910
AT1G32930	B3GALT6
AT1G33060	NAC014
AT1G33110	AT1G33110
AT1G33170	AT1G33170
AT1G33230	AT1G33230
AT1G33240	AT-GTL1
AT1G33250	AT1G33250
AT1G33260	AT1G33260
AT1G33270	AT1G33270
AT1G33280	BRN1
AT1G33290	AT1G33290
AT1G33350	PCMP-E57
AT1G33420	AT1G33420
AT1G33450	AT1G33450
AT1G33470	AT1G33470
AT1G33560	ADR1
AT1G33590	AT1G33590
AT1G33600	AT1G33600
AT1G33607	AT1G33607
AT1G33610	AT1G33610
AT1G33680	AT1G33680
AT1G33700	AT1G33700
AT1G33730	CYP76C5
AT1G33760	ERF022
AT1G33780	AT1G33780
AT1G33785	AT1G33785
AT1G33800	GXM3
AT1G33810	AT1G33810
AT1G33811	AT1G33811
AT1G33960	AIG1
AT1G33970	AT1G33970
AT1G33990	MES14
AT1G34000	OHP2
AT1G34030	RPS18A
AT1G34040	TAR3
AT1G34044	AT1G34044
AT1G34060	TAR4
AT1G34210	SERK2
AT1G34245	EPF2
AT1G34315	AT1G34315
AT1G34340	AT1G34340
AT1G34350	AT1G34350
AT1G34360	AT1G34360
AT1G34370	STOP1
AT1G34420	AT1G34420
AT1G34570	AT1G34570
AT1G34630	AT1G34630
AT1G34670	AtMYB93
AT1G34750	AT1G34750
AT1G34844	AT1G34844
AT1G35110	AT1G35110
AT1G35140	EXL1
AT1G35160	GRF4
AT1G35190	AT1G35190
AT1G35210	AT1G35210
AT1G35220	AT1G35220
AT1G35250	AT1G35250
AT1G35255	AT1G35255
AT1G35320	AT1G35320
AT1G35330	ATL34
AT1G35333	AT1G35333
AT1G35350	PHO1-H8
AT1G35430	AT1G35430
AT1G35460	BHLH80
AT1G35461	AT1G35461
AT1G35510	AT1G35510
AT1G35513	AT1G35513
AT1G35515	HOS10
AT1G35516	AT1G35516
AT1G35560	TCP23
AT1G35570	AT1G35570
AT1G35580	CINV1
AT1G35610	AT1G35610
AT1G35614	AT1G35614
AT1G35670	CPK11
AT1G35720	ANN1
AT1G35730	APUM9
AT1G35750	APUM10
AT1G35780	AT1G35780
AT1G35830	AT1G35830
AT1G35910	TPPD
AT1G36060	ERF055
AT1G36070	AT1G36070
AT1G36180	ACC2
AT1G36370	SHM7
AT1G36622	AT1G36622
AT1G36936	AT1G36936
AT1G36940	AT1G36940
AT1G37120	AT1G37120
AT1G37130	NIA2
AT1G37140	MCT1
AT1G38131	AT1G38131
AT1G38140	AT1G38140
AT1G38149	AT1G38149
AT1G40104	AT1G40104
AT1G41830	SKS6
AT1G42420	AT1G42420
AT1G42480	AT1G42480
AT1G42490	AT1G42490
AT1G42550	PMI1
AT1G42990	BZIP60
AT1G43000	AT1G43000
AT1G43160	RAP2-6
AT1G43560	Aty2
AT1G43580	AT1G43580
AT1G43670	AT1G43670
AT1G43700	VIP1
AT1G43710	SDC
AT1G43800	S-ACP-DES6
AT1G43850	SEU
AT1G43886	AT1G43886
AT1G43890	RABC1
AT1G43910	AT1G43910
AT1G43930	AT1G43930
AT1G43980	PCMP-E58
AT1G44000	SGRL
AT1G44080	AT1G44080
AT1G44100	AAP5
AT1G44160	AT1G44160
AT1G44170	ALDH3H1
AT1G44318	HEMB2
AT1G44350	ILL6
AT1G44446	CAO
AT1G44575	PSBS
AT1G44750	PUP11
AT1G44760	AT1G44760
AT1G44790	AT1G44790
AT1G44800	AT1G44800
AT1G44810	AT1G44810
AT1G44830	ERF014
AT1G44890	AT1G44890
AT1G45010	AT1G45010
AT1G45130	BGAL5
AT1G45145	TRX5
AT1G45160	IRE4
AT1G45170	OEP24A
AT1G45207	AT1G45207
AT1G45249	ABF2
AT1G45474	LHCA5
AT1G45688	AT1G45688
AT1G45976	SBP1
AT1G46192	AT1G46192
AT1G46264	HSFB4
AT1G46480	WOX4
AT1G46554	AT1G46554
AT1G46768	RAP2-1
AT1G46840	AT1G46840
AT1G47128	RD21A
AT1G47200	WPP2
AT1G47240	NRAMP2
AT1G47310	AT1G47310
AT1G47330	CBSDUF7
AT1G47380	AT1G47380
AT1G47480	CXE2
AT1G47490	RBP47C
AT1G47497	AT1G47497
AT1G47510	AT5PTASE11
AT1G47520	AT1G47520
AT1G47530	AT1G47530
AT1G47560	SEC3B
AT1G47570	AT1G47570
AT1G47578	AT1G47578
AT1G47600	TGG4
AT1G47610	AT1G47610
AT1G47710	AT1G47710
AT1G47720	OSB1
AT1G47860	AT1G47860
AT1G47890	AtRLP7
AT1G47970	AT1G47970
AT1G47990	GA2OX4
AT1G48000	MYB112
AT1G48090	AT1G48090
AT1G48095	AT1G48095
AT1G48100	AT1G48100
AT1G48110	ECT7
AT1G48130	PER1
AT1G48200	AT1G48200
AT1G48240	NPSN12
AT1G48260	CIPK17
AT1G48280	AT1G48280
AT1G48300	AT1G48300
AT1G48315	AT1G48315
AT1G48320	DHNAT1
AT1G48330	AT1G48330
AT1G48370	YSL8
AT1G48410	AGO1
AT1G48450	AT1G48450
AT1G48480	RKL1
AT1G48500	TIFY6A
AT1G48510	AT1G48510
AT1G48580	AT1G48580
AT1G48610	AT1G48610
AT1G48620	HON5
AT1G48630	RACK1B
AT1G48690	AT1G48690
AT1G48742	MIR157D
AT1G48745	AT1G48745
AT1G48790	AMSH1
AT1G48870	AT1G48870
AT1G48880	TBL7
AT1G48930	AtGH9C1
AT1G48953	AT1G48953
AT1G48960	AT1G48960
AT1G49000	AT1G49000
AT1G49005	CLE11
AT1G49010	AT1G49010
AT1G49032	AT1G49032
AT1G49130	COL8
AT1G49160	WNK7
AT1G49200	ATL75
AT1G49210	ATL76
AT1G49230	ATL78
AT1G49240	ACT8
AT1G49320	ATUSPL1
AT1G49435	LCR16
AT1G49450	AT1G49450
AT1G49500	AT1G49500
AT1G49520	AT1G49520
AT1G49560	AT1G49560
AT1G49580	CRK8
AT1G49590	AT1G49590
AT1G49600	RBP47A
AT1G49610	AT1G49610
AT1G49620	KRP7
AT1G49650	CXE4
AT1G49710	FUT12
AT1G49720	ABF1
AT1G49730	AT1G49730
AT1G49750	AT1G49750
AT1G49780	PUB26
AT1G49832	AT1G49832
AT1G49840	AT1G49840
AT1G49850	AT1G49850
AT1G49870	AT1G49870
AT1G49890	QWRF2
AT1G49900	AT1G49900
AT1G49950	TRB1
AT1G50000	AT1G50000
AT1G50020	AT1G50020
AT1G50040	AT1G50040
AT1G50055	TAS1B
AT1G50100	AT1G50100
AT1G50110	BCAT6
AT1G50170	ATSIRB
AT1G50260	NTMC2T5.1
AT1G50280	AT1G50280
AT1G50290	AT1G50290
AT1G50320	ATHX
AT1G50420	SCL3
AT1G50460	HKL1
AT1G50480	THFS
AT1G50560	CYP705A25
AT1G50570	AT1G50570
AT1G50575	AT1G50575
AT1G50590	AT1G50590
AT1G50600	SCL5
AT1G50630	AT1G50630
AT1G50650	AT1G50650
AT1G50660	AT1G50660
AT1G50740	FAX5
AT1G50840	POLIA
AT1G50890	SP2L
AT1G50954	AT1G50954
AT1G50990	AT1G50990
AT1G51060	HTA10
AT1G51090	AT1G51090
AT1G51130	NSE4A
AT1G51140	BHLH122
AT1G51160	AT1G51160
AT1G51170	UNC
AT1G51175	AT1G51175
AT1G51190	PLT2
AT1G51210	AT1G51210
AT1G51270	PVA14
AT1G51300	AT1G51300
AT1G51355	AT1G51355
AT1G51360	ATDABB1
AT1G51390	NIFU5
AT1G51400	AT1G51400
AT1G51460	ABCG13
AT1G51470	TGG5
AT1G51480	AT1G51480
AT1G51500	ABCG12
AT1G51520	AT1G51520
AT1G51530	AT1G51530
AT1G51550	AT1G51550
AT1G51570	AT1G51570
AT1G51590	MNS1
AT1G51660	MKK4
AT1G51680	4CL1
AT1G51690	PP2AB1
AT1G51700	DOF1.7
AT1G51710	UBP6
AT1G51760	ILL4
AT1G51780	ILL5
AT1G51790	AT1G51790
AT1G51800	AT1G51800
AT1G51805	AT1G51805
AT1G51840	AT1G51840
AT1G51850	AT1G51850
AT1G51860	AT1G51860
AT1G51940	LYK3
AT1G51950	IAA18
AT1G52000	JAL5
AT1G52080	AR791
AT1G52110	AT1G52110
AT1G52120	JAL12
AT1G52140	AT1G52140
AT1G52150	ATHB-15
AT1G52180	AT1G52180
AT1G52185	MIR406
AT1G52190	NPF1.2
AT1G52200	PCR8
AT1G52220	CURT1C
AT1G52240	ATROPGEF11
AT1G52280	RABG3D
AT1G52290	PERK15
AT1G52300	RPL37B
AT1G52330	AT1G52330
AT1G52340	ABA2
AT1G52347	AT1G52347
AT1G52410	TSA1
AT1G52430	AT1G52430
AT1G52450	AT1G52450
AT1G52510	AT1G52510
AT1G52540	AT1G52540
AT1G52565	AT1G52565
AT1G52590	AT1G52590
AT1G52615	AT1G52615
AT1G52710	AT1G52710
AT1G52740	HTA9
AT1G52750	AT1G52750
AT1G52760	CSE
AT1G52780	AT1G52780
AT1G52800	AT1G52800
AT1G52855	AT1G52855
AT1G52857	AT1G52857
AT1G52860	AT1G52860
AT1G52880	NAC018
AT1G52890	NAC019
AT1G52905	AT1G52905
AT1G52990	AT1G52990
AT1G53035	AT1G53035
AT1G53039	AT1G53039
AT1G53040	AT1G53040
AT1G53050	AT1G53050
AT1G53060	AT1G53060
AT1G53070	AT1G53070
AT1G53080	AT1G53080
AT1G53110	PPI4
AT1G53130	GRI
AT1G53160	SPL4
AT1G53163	AT1G53163
AT1G53165	ATMAP4K ALPHA1
AT1G53170	ERF8
AT1G53180	AT1G53180
AT1G53190	AT1G53190
AT1G53210	AT1G53210
AT1G53220	AT1G53220
AT1G53230	TCP3
AT1G53240	mMDH1
AT1G53280	DJ1B
AT1G53290	B3GALT14
AT1G53300	TTL1
AT1G53310	PPC1
AT1G53320	TULP7
AT1G53325	AT1G53325
AT1G53340	AT1G53340
AT1G53380	AT1G53380
AT1G53400	AT1G53400
AT1G53430	AT1G53430
AT1G53440	AT1G53440
AT1G53460	AT1G53460
AT1G53470	MSL4
AT1G53500	RHM2
AT1G53510	MPK18
AT1G53541	AT1G53541
AT1G53560	AT1G53560
AT1G53570	MAP3KA
AT1G53580	GLY3
AT1G53590	NTMC2T6.1
AT1G53600	PCMP-E63
AT1G53610	AT1G53610
AT1G53620	AT1G53620
AT1G53625	AT1G53625
AT1G53640	AT1G53640
AT1G53670	MSRB1
AT1G53690	NRPB12L
AT1G53700	WAG1
AT1G53730	SRF6
AT1G53750	RPT1A
AT1G53770	AT1G53770
AT1G53785	AT1G53785
AT1G53790	AT1G53790
AT1G53820	ATL60
AT1G53830	PME2
AT1G53840	PME1
AT1G53850	PAE1
[truncated: 10,471 more rows]

## Sheet: VAL1 VAL2 co-target genes
ID	name
AT1G01010	NAC001
AT1G01020	ARV1
AT1G01030	NGA3
AT1G01040	DCL1
AT1G01050	PPA1
AT1G01060	LHY
AT1G01070	AT1G01070
AT1G01080	AT1G01080
AT1G01120	KCS1
AT1G01130	AT1G01130
AT1G01140	CIPK9
AT1G01183	AT1G01183
AT1G01190	CYP78A8
AT1G01225	AT1G01225
AT1G01240	AT1G01240
AT1G01250	ERF023
AT1G01260	BHLH13
AT1G01300	AT1G01300
AT1G01310	AT1G01310
AT1G01320	AT1G01320
AT1G01340	CNGC10
AT1G01360	PYL9
AT1G01380	ETC1
AT1G01390	UGT72B2
AT1G01420	UGT72B3
AT1G01440	AT1G01440
AT1G01453	AT1G01453
AT1G01470	LEA14
AT1G01480	ACS2
AT1G01490	AT1G01490
AT1G01510	AN
AT1G01520	RVE3
AT1G01540	AT1G01540
AT1G01550	BPS1
AT1G01560	MPK11
AT1G01570	AT1G01570
AT1G01580	FRO2
AT1G01590	AT1G01590
AT1G01600	CYP86A4
AT1G01610	GPAT4
AT1G01650	SPPL4
AT1G01670	PUB56
AT1G01680	PUB54
AT1G01695	AT1G01695
AT1G01700	ROPGEF2
AT1G01720	NAC002
AT1G01760	AT1G01760
AT1G01800	AT1G01800
AT1G01830	AT1G01830
AT1G01860	PFC1
AT1G01910	AT1G01910
AT1G01930	AT1G01930
AT1G01950	ARK2
AT1G01990	AT1G01990
AT1G02020	AT1G02020
AT1G02030	ZAT1
AT1G02040	AT1G02040
AT1G02065	SPL8
AT1G02070	AT1G02070
AT1G02080	AT1G02080
AT1G02180	AT1G02180
AT1G02205	CER1
AT1G02210	AT1G02210
AT1G02220	NAC003
AT1G02228	AT1G02228
AT1G02230	NAC004
AT1G02250	NAC005
AT1G02270	AT1G02270
AT1G02300	AT1G02300
AT1G02305	AT1G02305
AT1G02310	MAN1
AT1G02330	AT1G02330
AT1G02335	GL22
AT1G02340	HFR1
AT1G02380	AT1G02380
AT1G02390	GPAT2
AT1G02391	AT1G02391
AT1G02400	GA2OX6
AT1G02420	AT1G02420
AT1G02450	NIMIN-1
AT1G02460	AT1G02460
AT1G02475	AT1G02475
AT1G02490	AT1G02490
AT1G02500	SAM1
AT1G02520	ABCB11
AT1G02560	CLPP5
AT1G02600	AT1G02600
AT1G02610	AT1G02610
AT1G02630	ETN8
AT1G02640	BXL2
AT1G02650	AT1G02650
AT1G02660	AT1G02660
AT1G02690	IMPA6
AT1G02700	AT1G02700
AT1G02720	GATL5
AT1G02770	AT1G02770
AT1G02810	PME7
AT1G02840	SR34
AT1G02850	BGLU11
AT1G02860	BAH1
AT1G02880	TPK1
AT1G02890	AT1G02890
AT1G02900	RALF1
AT1G02910	LPA1
AT1G03000	PEX6
AT1G03030	AT1G03030
AT1G03040	BHLH7
AT1G03070	AT1G03070
AT1G03080	NET1D
AT1G03106	AT1G03106
AT1G03120	ATRAB28
AT1G03130	PSAD2
AT1G03140	AT1G03140
AT1G03160	FZL
AT1G03170	FAF2
AT1G03200	AT1G03200
AT1G03220	AT1G03220
AT1G03230	AT1G03230
AT1G03240	AT1G03240
AT1G03250	AT1G03250
AT1G03290	AT1G03290
AT1G03300	ATDUF1
AT1G03350	AT1G03350
AT1G03365	RF4
AT1G03370	AT1G03370
AT1G03400	AT1G03400
AT1G03410	2A6
AT1G03440	AT1G03440
AT1G03457	BRN2
AT1G03470	NET3A
AT1G03510	PCMP-E3
AT1G03520	AT1G03520
AT1G03550	SCAMP2
AT1G03590	PPC6-6
AT1G03620	AT1G03620
AT1G03680	ATHM1
AT1G03710	AT1G03710
AT1G03720	AT1G03720
AT1G03730	AT1G03730
AT1G03743	AT1G03743
AT1G03800	ERF10
AT1G03840	MGP
AT1G03850	GRXS13
AT1G03880	CRB
AT1G03900	ATNAP4
AT1G03905	ABCI19
AT1G03930	ADK1
AT1G03935	AT1G03935
AT1G03950	VPS2.3
AT1G03970	GBF4
AT1G03980	PCS2
AT1G03990	FAO1
AT1G04000	AT1G04000
AT1G04010	PSAT
AT1G04030	AT1G04030
AT1G04040	AT1G04040
AT1G04070	TOM9-1
AT1G04090	AT1G04090
AT1G04100	IAA10
AT1G04120	ABCC5
AT1G04140	AT1G04140
AT1G04150	AT1G04150
AT1G04170	EIF2 GAMMA
AT1G04171	AT1G04171
AT1G04180	YUC9
AT1G04210	AT1G04210
AT1G04220	KCS17
AT1G04240	IAA3
AT1G04250	IAA17
AT1G04260	PRA1D
AT1G04270	RPS15A
AT1G04280	AT1G04280
AT1G04300	AT1G04300
AT1G04310	ERS2
AT1G04320	AT1G04320
AT1G04330	AT1G04330
AT1G04350	AT1G04350
AT1G04360	ATL1
AT1G04370	ERF14
AT1G04400	CRY2
AT1G04410	MDH1
AT1G04430	AT1G04430
AT1G04440	CKL13
AT1G04490	AT1G04490
AT1G04500	AT1G04500
AT1G04520	CRRSP3
AT1G04530	TPR4
AT1G04550	IAA12
AT1G04570	AT1G04570
AT1G04590	AT1G04590
AT1G04610	YUC3
AT1G04630	MEE4
AT1G04650	AT1G04650
AT1G04670	AT1G04670
AT1G04680	AT1G04680
AT1G04684	AT1G04684
AT1G04690	KAB1
AT1G04710	KAT1
AT1G04720	AT1G04720
AT1G04750	VAMP721
AT1G04770	AT1G04770
AT1G04780	AT1G04780
AT1G04820	TUBA4
AT1G04920	SPS3
AT1G04960	AT1G04960
AT1G04980	PDIL2-2
AT1G04985	AT1G04985
AT1G04990	AT1G04990
AT1G05000	AT1G05000
AT1G05010	ACO4
AT1G05061	AT1G05061
AT1G05070	AT1G05070
AT1G05090	AT1G05090
AT1G05100	MAPKKK18
AT1G05120	AT1G05120
AT1G05135	AT1G05135
AT1G05140	ARASP2
AT1G05150	AT1G05150
AT1G05170	B3GALT2
AT1G05200	GLR3.4
AT1G05230	HDG2
AT1G05240	PER1
AT1G05260	PER3
AT1G05270	AT1G05270
AT1G05300	ZIP5
AT1G05340	AT1G05340
AT1G05350	AT1G05350
AT1G05370	AT1G05370
AT1G05385	PSB27-2
AT1G05410	AT1G05410
AT1G05420	OFP12
AT1G05460	SDE3
AT1G05470	CVP2
AT1G05490	CLSY3
AT1G05520	AT1G05520
AT1G05530	UGT75B2
AT1G05550	AT1G05550
AT1G05560	UGT75B1
AT1G05570	CALS1
AT1G05577	AT1G05577
AT1G05620	URH2
AT1G05630	5PTASE13
AT1G05640	AT1G05640
AT1G05650	AT1G05650
AT1G05680	UGT74E2
AT1G05710	AT1G05710
AT1G05750	PDE247
AT1G05785	AT1G05785
AT1G05790	AT1G05790
AT1G05800	DGL
AT1G05805	BHLH128
AT1G05810	ARA
AT1G05835	AT1G05835
AT1G05840	AT1G05840
AT1G05850	CTL1
AT1G05870	AT1G05870
AT1G05950	AT1G05950
AT1G05970	AT1G05970
AT1G06000	UGT89C1
AT1G06040	BBX24
AT1G06070	AT1G06070
AT1G06080	ADS1
AT1G06110	SKIP16
AT1G06130	GLX2-4
AT1G06148	AT1G06148
AT1G06149	CPuORF8
AT1G06160	ERF094
AT1G06170	BHLH89
AT1G06180	ATMYB13
AT1G06200	AT1G06200
AT1G06225	AT1G06225
AT1G06270	AT1G06270
AT1G06290	ACX3
AT1G06310	ACX3.2
AT1G06330	AT1G06330
AT1G06360	AT1G06360
AT1G06370	AT1G06370
AT1G06390	ASK9
AT1G06410	TPS7
AT1G06450	CAF1-1
AT1G06460	ACD32.1
AT1G06475	AT1G06475
AT1G06480	AT1G06480
AT1G06510	AT1G06510
AT1G06520	GPAT1
AT1G06530	PMD2
AT1G06570	PDS1
AT1G06640	AT1G06640
AT1G06680	PSBP1
AT1G06700	PTI11
AT1G06740	AT1G06740
AT1G06760	AT1G06760
AT1G06770	DRIP1
AT1G06800	PLA-I{gamma}1
AT1G06840	AT1G06840
AT1G06850	AtbZIP52
AT1G06900	AT1G06900
AT1G06923	AT1G06923
AT1G06980	AT1G06980
AT1G06990	AT1G06990
AT1G07020	AT1G07020
AT1G07030	AT1G07030
AT1G07040	AT1G07040
AT1G07090	LSH6
AT1G07100	AT1G07100
AT1G07110	FKFBP
AT1G07128	AT1G07128
AT1G07135	AT1G07135
AT1G07160	AT1G07160
AT1G07175	AT1G07175
AT1G07180	NDA1
AT1G07200	AT1G07200
AT1G07220	AT1G07220
AT1G07230	NPC1
AT1G07280	AT1G07280
AT1G07290	GONST2
AT1G07310	AT1G07310
AT1G07350	SR45A
AT1G07360	AT1G07360
AT1G07390	AtRLP1
AT1G07400	HSP17.8
AT1G07420	SMO2-2
AT1G07430	AIP1
AT1G07480	AT1G07480
AT1G07485	AT1G07485
AT1G07500	AT1G07500
AT1G07520	SCL31
AT1G07530	SCL14
AT1G07540	AT1G07540
AT1G07560	AT1G07560
AT1G07570	APK1A
AT1G07580	AT1G07580
AT1G07590	AT1G07590
AT1G07620	TRM32
AT1G07630	PLL5
AT1G07640	DOF1.1
AT1G07645	ATDSI-1VOC
AT1G07670	ECA4
AT1G07710	AT1G07710
AT1G07720	KCS3
AT1G07760	AT1G07760
AT1G07770	RPS15AA
AT1G07780	PAI1
AT1G07810	ECA1
AT1G07820	AT1G07820
AT1G07870	AT1G07870
AT1G07885	AT1G07885
AT1G07900	LBD1
AT1G07910	ATRNL
AT1G07930	A3
AT1G07940	A3
AT1G07980	NF-YC10
AT1G08010	GATA11
AT1G08030	TPST
AT1G08040	AT1G08040
AT1G08080	ACA7
AT1G08090	NRT2.1
AT1G08100	AT1G08100
AT1G08115	AT1G08115
AT1G08130	LIG1
AT1G08165	AT1G08165
AT1G08190	VPS41
AT1G08200	AXS2
AT1G08210	AT1G08210
AT1G08230	GAT1
AT1G08250	ADT6
AT1G08280	AT1G08280
AT1G08290	WIP3
AT1G08310	AT1G08310
AT1G08315	AT1G08315
AT1G08320	TGA9
AT1G08340	ROPGAP5
AT1G08380	PSAO
AT1G08400	MAG2L
AT1G08420	BSL2
AT1G08430	ALMT1
AT1G08440	ALMT2
AT1G08450	CRT3
AT1G08470	SSL3
AT1G08490	NFS2
AT1G08500	ENODL18
AT1G08510	FATB
AT1G08540	SIGB
AT1G08570	ACHT4
AT1G08630	THA1
AT1G08640	CJD1
AT1G08680	AGD14
AT1G08695	AT1G08695
AT1G08720	EDR1
AT1G08760	AT1G08760
AT1G08810	MYB60
AT1G08820	PVA22
AT1G08860	BON3
AT1G08870	AT1G08870
AT1G08900	SUGTL3
AT1G08910	AT1G08910
AT1G08920	SUGTL2
AT1G08930	ERD6
AT1G08940	AT1G08940
AT1G08970	NFYC9
AT1G08990	GUX5
AT1G09010	EBM
AT1G09040	AT1G09040
AT1G09070	SRC2
AT1G09090	RBOHB
AT1G09130	CLPR3
AT1G09155	PP2B15
AT1G09160	AT1G09160
AT1G09176	AT1G09176
AT1G09200	HTR2
AT1G09210	CRT2
AT1G09230	SNRNP65
AT1G09240	NAS3
AT1G09250	BHLH149
AT1G09270	IMPA4
AT1G09310	AT1G09310
AT1G09320	AT1G09320
AT1G09350	GOLS3
AT1G09380	AT1G09380
AT1G09390	AT1G09390
AT1G09415	NIMIN-3
AT1G09420	G6PD4
AT1G09440	AT1G09440
AT1G09460	AT1G09460
AT1G09470	AT1G09470
AT1G09490	AT1G09490
AT1G09500	AT1G09500
AT1G09520	AT1G09520
AT1G09530	PIF3
AT1G09540	MYB61
AT1G09560	GLP4
AT1G09570	PHYA
AT1G09580	AT1G09580
AT1G09630	RABA2A
AT1G09645	AT1G09645
AT1G09660	AT1G09660
AT1G09750	AT1G09750
AT1G09760	U2A'
AT1G09780	PGM1
AT1G09800	AT1G09800
AT1G09810	ECT11
AT1G09812	AT1G09812
AT1G09815	POLD4
AT1G09880	AT1G09880
AT1G09920	AT1G09920
AT1G09935	AT1G09935
AT1G09940	HEMA2
AT1G09970	LRR XI-23
AT1G09980	AT1G09980
AT1G09995	AT1G09995
AT1G10020	AT1G10020
AT1G10040	AT1G10040
AT1G10060	BCAT1
AT1G10070	BCAT2
AT1G10090	AT1G10090
AT1G10110	AT1G10110
AT1G10120	BHLH74
AT1G10130	ECA3
AT1G10140	AT1G10140
AT1G10170	NFXL1
AT1G10180	EXO84C
AT1G10200	WLIM1
AT1G10220	AT1G10220
AT1G10230	ASK18
AT1G10240	FRS11
AT1G10270	GRP23
AT1G10280	AT1G10280
AT1G10290	DRP2A
AT1G10300	AT1G10300
AT1G10340	AT1G10340
AT1G10350	AT1G10350
AT1G10360	GSTU18
AT1G10380	AT1G10380
AT1G10385	EXO84A
AT1G10390	NUP98A
AT1G10400	UGT90A2
AT1G10410	AT1G10410
AT1G10417	AT1G10417
AT1G10430	PP2A2
AT1G10460	GLP7
AT1G10470	ARR4
AT1G10480	ZFP5
AT1G10490	AT1G10490
AT1G10500	ISCA
AT1G10530	AT1G10530
AT1G10550	XTH33
AT1G10585	AT1G10585
AT1G10588	AT1G10588
AT1G10590	AT1G10590
AT1G10640	AT1G10640
AT1G10650	AT1G10650
AT1G10652	AT1G10652
AT1G10657	AT1G10657
AT1G10682	AT1G10682
AT1G10690	AT1G10690
AT1G10700	PRS3
AT1G10710	PHS1
AT1G10740	AT1G10740
AT1G10745	AT1G10745
AT1G10750	AT1G10750
AT1G10760	GWD1
AT1G10820	AT1G10820
AT1G10870	AGD4
AT1G10880	AT1G10880
AT1G10890	AT1G10890
AT1G10900	PIP5K7
AT1G10920	LOV1
AT1G10940	SRK2A
AT1G10960	FD1
AT1G11000	MLO4
AT1G11040	AT1G11040
AT1G11060	AT1G11060
AT1G11080	SCPL31
AT1G11090	AT1G11090
AT1G11112	AT1G11112
AT1G11120	AT1G11120
AT1G11125	AT1G11125
AT1G11130	SUB
AT1G11160	AT1G11160
AT1G11170	AT1G11170
AT1G11175	AT1G11175
AT1G11185	AT1G11185
AT1G11210	AT1G11210
AT1G11220	AT1G11220
AT1G11230	AT1G11230
AT1G11240	AT1G11240
AT1G11250	SYP125
AT1G11260	STP1
AT1G11280	AT1G11280
AT1G11310	MLO2
AT1G11320	AT1G11320
AT1G11330	AT1G11330
AT1G11362	AT1G11362
AT1G11370	PME56
AT1G11390	AT1G11390
AT1G11420	ATDUF2
AT1G11440	AT1G11440
AT1G11460	AT1G11460
AT1G11530	CXXS1
AT1G11540	AT1G11540
AT1G11545	XTH8
AT1G11580	PME18
AT1G11590	PME19
AT1G11600	CYP77B1
AT1G11630	AT1G11630
AT1G11660	HSP70-16
AT1G11670	AT1G11670
AT1G11680	CYP51G1
AT1G11690	AT1G11690
AT1G11700	AT1G11700
AT1G11720	SS3
AT1G11735	MIR171B
AT1G11740	AT1G11740
AT1G11770	AT1G11770
AT1G11790	ADT1
AT1G11820	AT1G11820
AT1G11840	ATGLX1
AT1G11850	AT1G11850
AT1G11900	AT1G11900
AT1G11910	APA1
AT1G11920	AT1G11920
AT1G11940	AT1G11940
AT1G11950	AT1G11950
AT1G11960	AT1G11960
AT1G12000	PFP-BETA1
AT1G12020	AT1G12020
AT1G12030	AT1G12030
AT1G12060	BAG5
AT1G12070	AT1G12070
AT1G12080	AT1G12080
AT1G12090	ELP
AT1G12100	AT1G12100
AT1G12110	NPF6.3
AT1G12120	AT1G12120
AT1G12140	FMOGS-OX5
AT1G12200	AT1G12200
AT1G12210	RFL1
AT1G12211	AT1G12211
AT1G12240	BFRUCT4
AT1G12244	AT1G12244
AT1G12270	HOP1
AT1G12290	AT1G12290
AT1G12320	AT1G12320
AT1G12330	AT1G12330
AT1G12370	PHR1
AT1G12380	AT1G12380
AT1G12411	AT1G12411
AT1G12423	AT1G12423
AT1G12430	ARK3
AT1G12440	SAP1
AT1G12460	AT1G12460
AT1G12490	AT1G12490
AT1G12500	AT1G12500
AT1G12530	AT1G12530
AT1G12550	HPR3
AT1G12560	EXPA7
AT1G12580	PEPKR1
AT1G12610	DREB1F
AT1G12640	LPLAT1
AT1G12670	AT1G12670
AT1G12710	P2A12
AT1G12740	CYP87A2
AT1G12750	RBL6
AT1G12780	UGE1
AT1G12800	AT1G12800
AT1G12820	AFB3
AT1G12845	AT1G12845
AT1G12950	RSH2
AT1G12960	AT1G12960
AT1G12980	ESR1
AT1G12990	AT1G12990
AT1G13020	EIF4B2
AT1G13080	CYP71B2
AT1G13090	CYP71B28
AT1G13100	CYP71B29
AT1G13110	CYP71B7
AT1G13145	AT1G13145
AT1G13180	ARP3
AT1G13195	AT1G13195
AT1G13210	ALA11
AT1G13240	AT1G13240
AT1G13250	GATL3
AT1G13260	RAV1
AT1G13280	AOC4
AT1G13300	HRS1
AT1G13310	AT1G13310
AT1G13340	AT1G13340
AT1G13360	AT1G13360
AT1G13370	AT1G13370
AT1G13380	AT1G13380
AT1G13390	AT1G13390
AT1G13430	STO9
AT1G13440	GAPC2
AT1G13450	GT-1
AT1G13470	AT1G13470
AT1G13510	AT1G13510
AT1G13550	AT1G13550
AT1G13560	AAPT1
AT1G13570	AT1G13570
AT1G13590	PSK1
AT1G13605	AT1G13605
AT1G13635	AT1G13635
AT1G13640	PI4KG6
AT1G13670	AT1G13670
AT1G13690	ATE1
AT1G13700	PGL1
AT1G13710	CYP78A5
AT1G13740	AFP2
AT1G13750	PAP1
AT1G13830	AT1G13830
AT1G13860	QUL1
AT1G13900	PAP2
AT1G13930	AT1G13930
AT1G13940	AT1G13940
AT1G13950	ELF5A-1
AT1G13960	WRKY4
AT1G13970	AT1G13970
AT1G13980	GN
AT1G13990	AT1G13990
AT1G14000	VIK
AT1G14010	AT1G14010
AT1G14040	PHO1
AT1G14080	FUT6
AT1G14090	AT1G14090
AT1G14120	AT1G14120
AT1G14130	AT1G14130
AT1G14170	AT1G14170
AT1G14182	AT1G14182
AT1G14200	AT1G14200
AT1G14210	AT1G14210
AT1G14220	AT1G14220
AT1G14230	APY4
AT1G14240	APY3
AT1G14260	AT1G14260
AT1G14270	AT1G14270
AT1G14290	SBH2
AT1G14315	AT1G14315
AT1G14330	AT1G14330
AT1G14340	AT1G14340
AT1G14345	AT1G14345
AT1G14350	FLP
AT1G14360	UTR3
AT1G14370	APK2A
AT1G14380	IQD28
AT1G14400	UBC1
AT1G14440	ZHD4
AT1G14450	AT1G14450
AT1G14460	F14L17.24
AT1G14490	AHL28
AT1G14510	AL7
AT1G14520	MIOX1
AT1G14530	THH1
AT1G14540	PER4
AT1G14549	AT1G14549
AT1G14560	AT1G14560
AT1G14570	PUX7
AT1G14580	IDD6
AT1G14590	AT1G14590
AT1G14600	AT1G14600
AT1G14620	DECOY
AT1G14640	AT1G14640
AT1G14650	AT1G14650
AT1G14660	NHX8
AT1G14685	BPC2
AT1G14687	ZHD14
AT1G14690	MAP65-7
AT1G14700	PAP3
AT1G14710	AT1G14710
AT1G14740	OBE3
AT1G14750	SDS
AT1G14770	AT1G14770
AT1G14780	AT1G14780
AT1G14820	AT1G14820
AT1G14830	DRP1C
AT1G14840	MAP70.4
AT1G14860	NUDT18
AT1G14870	PCR2
AT1G14890	AT1G14890
AT1G14920	GAI
AT1G14950	AT1G14950
AT1G14960	AT1G14960
AT1G14970	AT1G14970
AT1G14990	AT1G14990
AT1G15020	QSOX1
AT1G15040	AT1G15040
AT1G15060	AT1G15060
AT1G15080	LPP2
AT1G15090	AT1G15090
AT1G15100	RHA2A
AT1G15110	PSS1
AT1G15120	AT1G15120
AT1G15125	AT1G15125
AT1G15140	AT1G15140
AT1G15165	AT1G15165
AT1G15175	AT1G15175
AT1G15190	FLA19
AT1G15210	ABCG35
AT1G15220	CCMH
AT1G15230	AT1G15230
AT1G15250	RPL37A
AT1G15290	AT1G15290
AT1G15300	AT1G15300
AT1G15340	MBD10
AT1G15350	AT1G15350
AT1G15360	WIN1
AT1G15370	AT1G15370
AT1G15380	AT1G15380
AT1G15400	AT1G15400
AT1G15420	AT1G15420
AT1G15440	PWP2
AT1G15460	BOR4
AT1G15480	AT1G15480
AT1G15490	AT1G15490
AT1G15520	ABCG40
AT1G15530	LECRKS1
AT1G15550	GA3OX1
AT1G15570	CYCA2-3
AT1G15580	IAA5
AT1G15640	AT1G15640
AT1G15670	AT1G15670
AT1G15690	AVP1
AT1G15720	TRFL5
AT1G15730	AT1G15730
AT1G15740	AT1G15740
AT1G15750	TPL
AT1G15757	AT1G15757
AT1G15760	AT1G15760
AT1G15800	AT1G15800
AT1G15820	LHCB6
AT1G15840	AT1G15840
AT1G15860	AT1G15860
AT1G15880	GOS11
AT1G15940	AT1G15940
AT1G15950	CCR1
AT1G15960	NRAMP6
AT1G15970	AT1G15970
AT1G16000	AT1G16000
AT1G16010	MRS2-1
AT1G16030	HSP70-5
AT1G16060	ADAP
AT1G16100	AT1G16100
AT1G16130	WAKL2
AT1G16150	WAKL4
AT1G16170	AT1G16170
AT1G16190	RAD23A
AT1G16220	AT1G16220
AT1G16240	SYP51
AT1G16260	WAKL8
AT1G16300	GAPCP2
AT1G16310	MTP10
AT1G16360	ALIS4
AT1G16370	45936
AT1G16410	CYP79F1
AT1G16460	STR2
AT1G16490	ATMYB58
AT1G16500	AT1G16500
AT1G16510	SAUR41
AT1G16515	AT1G16515
AT1G16530	LBD3
AT1G16670	AT1G16670
AT1G16705	AT1G16705
AT1G16720	HCF173
AT1G16730	UP6
AT1G16750	AT1G16750
AT1G16820	AT1G16820
AT1G16840	AT1G16840
AT1G16850	AT1G16850
AT1G16870	AT1G16870
AT1G16890	UBC36
AT1G16900	ALG9
AT1G16916	AT1G16916
AT1G16920	RABA1B
AT1G16950	AT1G16950
AT1G17040	SHA
AT1G17050	SPS2
AT1G17060	CYP72C1
AT1G17090	AT1G17090
AT1G17130	AT1G17130
AT1G17140	ICR1
AT1G17147	VQ1
AT1G17150	AT1G17150
AT1G17170	GSTU24
AT1G17190	GSTU26
AT1G17200	AT1G17200
AT1G17210	ATILP1
AT1G17230	AT1G17230
AT1G17235	RTFL11
AT1G17290	ALAAT1
AT1G17300	AT1G17300
AT1G17310	AT1G17310
AT1G17340	SAC5
AT1G17345	AT1G17345
AT1G17360	AT1G17360
AT1G17370	UBP1B
AT1G17380	TIFY11A
AT1G17400	AT1G17400
AT1G17410	AT1G17410
AT1G17420	LOX3
AT1G17440	TAF12B
AT1G17450	AT1G17450
AT1G17460	TRFL3
AT1G17495	AT1G17495
AT1G17510	AT1G17510
AT1G17530	TIM23-1
AT1G17550	HAB2
AT1G17560	HLL
AT1G17590	NFYA8
AT1G17615	AT1G17615
AT1G17620	AT1G17620
AT1G17665	AT1G17665
AT1G17710	AT1G17710
AT1G17720	PP2AB2
AT1G17744	AT1G17744
AT1G17750	PEPR2
AT1G17830	AT1G17830
AT1G17850	STR8
AT1G17890	GER2
AT1G17920	HDG12
AT1G17940	AT1G17940
AT1G17980	PAPS1
AT1G18040	CDKD-3
AT1G18075	MIR159B
AT1G18080	RACK1A
AT1G18100	MFT
AT1G18120	AT1G18120
AT1G18140	LAC1
AT1G18150	MPK8
AT1G18190	GC2
AT1G18191	AT1G18191
AT1G18200	RABA6B
AT1G18250	ATLP-1
AT1G18260	HRD3A
AT1G18270	AT1G18270
AT1G18290	AT1G18290
AT1G18300	NUDT4
AT1G18330	RVE7
AT1G18335	AT1G18335
AT1G18350	MKK7
AT1G18360	AT1G18360
AT1G18382	AT1G18382
AT1G18400	BEE1
AT1G18410	AT1G18410
AT1G18415	AT1G18415
AT1G18460	AT1G18460
AT1G18470	AT1G18470
AT1G18500	IPMS1
AT1G18560	AT1G18560
AT1G18570	MYB51
AT1G18580	GAUT11
AT1G18590	SOT17
AT1G18610	AT1G18610
AT1G18620	AT1G18620
AT1G18640	PSP
AT1G18670	IBS1
AT1G18710	AtMYB47
AT1G18720	AT1G18720
AT1G18735	AT1G18735
AT1G18740	AT1G18740
AT1G18773	AT1G18773
AT1G18800	NRP2
AT1G18820	AT1G18820
AT1G18835	MIF3
AT1G18840	IQD30
AT1G18850	AT1G18850
AT1G18870	ICS2
AT1G18890	CPK10
AT1G18900	AT1G18900
AT1G18910	AT1G18910
AT1G18940	AT1G18940
AT1G18970	GLP1
AT1G18990	MYOB5
AT1G19000	AT1G19000
AT1G19010	AT1G19010
AT1G19020	AT1G19020
AT1G19030	AT1G19030
AT1G19050	ARR7
AT1G19110	AT1G19110
AT1G19140	AT1G19140
AT1G19170	AT1G19170
AT1G19180	TIFY10A
AT1G19220	ARF19
AT1G19230	RBOHE
AT1G19240	AT1G19240
AT1G19250	FMO1
AT1G19270	DA1
AT1G19290	AT1G19290
AT1G19300	GATL1
AT1G19310	AT1G19310
AT1G19330	AT1G19330
AT1G19350	BZR2
AT1G19360	AT1G19360
AT1G19370	AT1G19370
AT1G19400	AT1G19400
AT1G19430	AT1G19430
AT1G19440	KCS4
AT1G19450	AT1G19450
AT1G19460	AT1G19460
AT1G19480	AT1G19480
AT1G19485	AT1G19485
AT1G19490	AT1G19490
AT1G19530	AT1G19530
AT1G19540	AT1G19540
AT1G19570	DHAR1
AT1G19600	AT1G19600
AT1G19610	PDF1.4
AT1G19630	CYP722A1
AT1G19640	JMT
AT1G19650	SFH4
AT1G19660	BBD2
AT1G19700	BLH10
AT1G19720	DYW7
AT1G19750	AT1G19750
AT1G19770	PUP14
AT1G19800	TGD1
AT1G19830	AT1G19830
AT1G19835	FPP4
AT1G19840	AT1G19840
AT1G19850	ARF5
AT1G19870	IQD32
AT1G19910	VHA-C2
AT1G19920	APS2
AT1G19940	AtGH9B5
AT1G19950	HVA22H
AT1G19960	AT1G19960
AT1G19968	AT1G19968
AT1G19970	AT1G19970
AT1G20010	TUBB5
AT1G20030	AT1G20030
AT1G20070	AT1G20070
AT1G20090	ARAC4
AT1G20100	AT1G20100
AT1G20170	AT1G20170
AT1G20190	EXPA11
AT1G20200	RPN3A
AT1G20220	AT1G20220
AT1G20250	AT1G20250
AT1G20270	P4H3
AT1G20310	AT1G20310
AT1G20330	SMT2
AT1G20340	DRT112
AT1G20370	AT1G20370
AT1G20375	AT1G20375
AT1G20380	AT1G20380
AT1G20410	AT1G20410
AT1G20440	COR47
AT1G20450	ERD10
AT1G20480	4CLL2
AT1G20490	AT1G20490
AT1G20500	AT1G20500
AT1G20510	4CLL5
AT1G20540	AT1G20540
AT1G20560	AAE1
AT1G20575	AT1G20575
AT1G20620	CAT3
AT1G20630	CAT1
AT1G20640	NLP4
AT1G20650	AT1G20650
AT1G20657	AT1G20657
AT1G20670	AT1G20670
AT1G20691	AT1G20691
AT1G20696	HMGB3
AT1G20700	WOX14
AT1G20816	OEP21A
AT1G20820	AT1G20820
AT1G20823	ATL80
AT1G20840	MSSP1
AT1G20850	XCP2
AT1G20860	PHT1-8
AT1G20880	AT1G20880
AT1G20890	AT1G20890
AT1G20900	AHL27
AT1G20967	AT1G20967
AT1G20980	SPL14
AT1G20990	AT1G20990
AT1G21000	AT1G21000
AT1G21010	AT1G21010
AT1G21020	AT1G21020
AT1G21050	AT1G21050
AT1G21060	AT1G21060
AT1G21070	AT1G21070
AT1G21080	AT1G21080
AT1G21090	AT1G21090
AT1G21100	AT1G21100
AT1G21110	AT1G21110
AT1G21120	AT1G21120
AT1G21130	AT1G21130
AT1G21140	AT1G21140
AT1G21210	WAK4
AT1G21250	WAK1
AT1G21260	AT1G21260
AT1G21290	AT1G21290
AT1G21300	AT1G21300
AT1G21310	EXT3
AT1G21320	AT1G21320
AT1G21326	AT1G21326
AT1G21350	AT1G21350
AT1G21360	GLTP2
AT1G21370	AT1G21370
AT1G21380	AT1G21380
AT1G21400	F24J8.4
AT1G21410	SKP2A
AT1G21430	AT1G21430
AT1G21450	SCL1
AT1G21460	SWEET1
AT1G21475	AT1G21475
AT1G21480	AT1G21480
AT1G21500	AT1G21500
AT1G21520	AT1G21520
AT1G21525	AT1G21525
AT1G21528	AT1G21528
AT1G21540	AEE9
AT1G21550	CML44
AT1G21580	AT1G21580
AT1G21590	AT1G21590
AT1G21600	PTAC6
AT1G21620	APUM20
AT1G21640	NADK2
AT1G21660	AT1G21660
AT1G21670	AT1G21670
AT1G21695	AT1G21695
AT1G21730	AT1G21730
AT1G21738	AT1G21738
AT1G21750	PDIL1-1
AT1G21760	SKIP32
AT1G21770	AT1G21770
AT1G21790	AT1G21790
AT1G21830	AT1G21830
AT1G21880	LYM1
AT1G21890	AT1G21890
AT1G21900	AT1G21900
AT1G21910	ERF012
AT1G21920	AT1G21920
AT1G21950	AT1G21950
AT1G21975	AT1G21975
AT1G21980	PIP5K1
AT1G21990	AT1G21990
AT1G22030	AT1G22030
AT1G22040	AT1G22040
AT1G22050	MUB6
AT1G22060	AT1G22060
AT1G22065	AT1G22065
AT1G22070	TGA3
AT1G22100	AT1G22100
AT1G22110	AT1G22110
AT1G22130	AT1G22130
AT1G22140	AT1G22140
AT1G22160	AT1G22160
AT1G22170	AT1G22170
AT1G22180	AT1G22180
AT1G22190	RAP2-13
AT1G22220	AT1G22220
AT1G22230	AT1G22230
AT1G22250	AT1G22250
AT1G22260	ZYP1A
AT1G22310	MBD8
AT1G22350	AT1G22350
AT1G22400	UGT85A1
AT1G22403	AT1G22403
AT1G22410	AT1G22410
AT1G22430	AT1G22430
AT1G22440	AT1G22440
AT1G22460	AT1G22460
AT1G22470	AT1G22470
AT1G22490	BHLH94
AT1G22500	ATL15
AT1G22510	AT1G22510
AT1G22520	AT1G22520
AT1G22530	PATL2
AT1G22540	NPF5.10
AT1G22550	NPF5.16
AT1G22570	NPF5.15
AT1G22600	AT1G22600
AT1G22610	AT1G22610
AT1G22640	MYB3
AT1G22650	INVD
AT1G22710	SUC2
AT1G22720	AT1G22720
AT1G22740	RABG3B
AT1G22767	AT1G22767
AT1G22790	AT1G22790
AT1G22810	ERF019
AT1G22882	AT1G22882
AT1G22885	AT1G22885
AT1G22890	AT1G22890
AT1G22900	DIR11
AT1G22920	CSN5B
AT1G22930	AT1G22930
AT1G22985	ERF069
AT1G22990	HIPP22
AT1G23000	AT1G23000
AT1G23010	LPR1
AT1G23020	FRO3
AT1G23030	PUB11
AT1G23040	AT1G23040
AT1G23050	AT1G23050
AT1G23060	AT1G23060
AT1G23070	AT1G23070
AT1G23074	AT1G23074
AT1G23080	PIN7
AT1G23090	SULTR3
AT1G23100	AT1G23100
AT1G23110	AT1G23110
AT1G23140	AT1G23140
AT1G23149	CPuORF29
AT1G23170	AT1G23170
AT1G23190	PGM3
AT1G23205	AT1G23205
AT1G23210	AtGH9B6
AT1G23220	AT1G23220
AT1G23310	GGAT1
AT1G23330	AT1G23330
AT1G23340	AT1G23340
AT1G23360	MENG
AT1G23380	KNAT6
AT1G23390	AT1G23390
AT1G23400	CAF2
AT1G23440	AT1G23440
AT1G23480	CSLA3
AT1G23490	ARF2-A
AT1G23510	AT1G23510
AT1G23560	AT1G23560
AT1G23700	AT1G23700
AT1G23710	AT1G23710
AT1G23730	BCA3
AT1G23740	AT1G23740
AT1G23780	SKIP22
AT1G23820	SPDS1
AT1G23850	AT1G23850
AT1G23860	RSZ21
AT1G23880	AT1G23880
AT1G23890	AT1G23890
AT1G23960	AT1G23960
AT1G23970	AT1G23970
AT1G23980	ATL47
AT1G23990	AT1G23990
AT1G24080	AT1G24080
AT1G24095	AT1G24095
AT1G24100	UGT74B1
AT1G24120	ATJ16
AT1G24130	AT1G24130
AT1G24145	AT1G24145
AT1G24147	AT1G24147
AT1G24148	AT1G24148
AT1G24150	ATFH4
AT1G24160	AT1G24160
AT1G24170	GATL8
AT1G24180	IAR4
AT1G24260	45903
AT1G24265	AT1G24265
AT1G24340	EMB260
AT1G24350	AT1G24350
AT1G24405	AT1G24405
AT1G24440	AT1G24440
AT1G24480	AT1G24480
AT1G24530	AT1G24530
AT1G24540	CYP86C1
AT1G24575	AT1G24575
AT1G24600	AT1G24600
AT1G24620	CML25
AT1G24625	ZFP7
AT1G24764	MAP70.2
AT1G24792	AT1G24792
AT1G25220	ASB1
AT1G25250	IDD16
AT1G25260	AT1G25260
AT1G25275	AT1G25275
AT1G25280	TULP10
AT1G25310	MEE8
AT1G25320	AT1G25320
AT1G25340	AT1G25340
AT1G25350	OVA9
AT1G25370	AT1G25370
AT1G25375	AT1G25375
AT1G25390	AT1G25390
AT1G25410	IPT6
AT1G25420	AT1G25420
AT1G25422	AT1G25422
AT1G25425	CLE43
AT1G25440	COL16
AT1G25450	KCS5
AT1G25460	AT1G25460
AT1G25480	ALMT4
AT1G25500	AT1G25500
AT1G25530	AT1G25530
AT1G25540	MED25
AT1G25560	TEM1
AT1G25570	AT1G25570
AT1G25580	NAC008
AT1G26090	AT1G26090
AT1G26100	CYB561D
AT1G26150	PERK10
AT1G26200	AT1G26200
AT1G26208	AT1G26208
AT1G26230	CPN60B4
AT1G26260	BHLH76
AT1G26270	PI4KG5
AT1G26290	AT1G26290
AT1G26380	AT1G26380
AT1G26390	AT1G26390
AT1G26410	AT1G26410
AT1G26420	AT1G26420
AT1G26440	UPS5
AT1G26490	AT1G26490
AT1G26540	AT1G26540
AT1G26558	AT1G26558
AT1G26560	BGLU40
AT1G26570	UGD1
AT1G26590	AT1G26590
AT1G26600	CLE9
AT1G26620	AT1G26620
AT1G26690	AT1G26690
AT1G26720	AT1G26720
AT1G26730	PHO1-H7
AT1G26770	EXPA10
AT1G26773	AT1G26773
AT1G26790	AT1G26790
AT1G26797	AT1G26797
AT1G26800	AT1G26800
AT1G26850	AT1G26850
AT1G26900	PCMP-E54
AT1G26916	AT1G26916
AT1G26920	AT1G26920
AT1G26930	AT1G26930
AT1G26940	CYP23
AT1G26945	PRE6
AT1G26950	AT1G26950
AT1G26970	AT1G26970
AT1G27000	AT1G27000
AT1G27020	AT1G27020
AT1G27030	AT1G27030
AT1G27050	ATHB54
AT1G27070	AT1G27070
AT1G27100	AT1G27100
AT1G27120	B3GALT17
AT1G27130	GSTU13
AT1G27170	AT1G27170
AT1G27180	AT1G27180
AT1G27190	AT1G27190
AT1G27200	AT1G27200
AT1G27210	AT1G27210
AT1G27290	AT1G27290
AT1G27330	AT1G27330
AT1G27350	AT1G27350
AT1G27360	SPL11
AT1G27370	SPL10
AT1G27385	AT1G27385
AT1G27440	IRX10
AT1G27460	NPGR1
AT1G27470	AT1G27470
AT1G27510	EX2
AT1G27540	AT1G27540
AT1G27600	IRX9H
AT1G27630	CYCT1-3
AT1G27640	AT1G27640
AT1G27650	U2AF35A
AT1G27660	BHLH110
AT1G27670	AT1G27670
AT1G27690	AT1G27690
AT1G27720	TAF4
AT1G27750	AT1G27750
AT1G27760	SAT32
AT1G27770	ACA1
AT1G27840	ATCSA-1
AT1G27850	AT1G27850
AT1G27910	PUB45
AT1G27930	AT1G27930
AT1G27940	ABCB13
AT1G27980	DPL1
AT1G28007	AT1G28007
AT1G28050	COL15
AT1G28070	AT1G28070
AT1G28080	AT1G28080
AT1G28090	AT1G28090
AT1G28100	AT1G28100
AT1G28110	SCPL45
AT1G28130	GH3.17
AT1G28135	AT1G28135
AT1G28170	SOT7
AT1G28180	AT1G28180
AT1G28190	AT1G28190
AT1G28200	FIP1
AT1G28230	PUP1
AT1G28250	AT1G28250
AT1G28260	SMG7L
AT1G28280	VQ4
AT1G28290	AGP31
AT1G28310	DOF1.4
AT1G28320	DEG15
AT1G28330	DYL1
AT1G28340	AtRLP4
AT1G28360	ERF12
AT1G28370	ERF11
AT1G28375	AT1G28375
AT1G28380	NSL1
AT1G28390	AT1G28390
AT1G28395	AT1G28395
AT1G28400	AT1G28400
AT1G28410	AT1G28410
AT1G28430	CYP705A24
AT1G28440	HSL1
AT1G28447	AT1G28447
AT1G28480	GRXC9
AT1G28570	AT1G28570
AT1G28580	AT1G28580
AT1G28591	AT1G28591
AT1G28600	AT1G28600
AT1G28610	AT1G28610
AT1G28620	AT1G28620
AT1G28640	AT1G28640
AT1G28650	AT1G28650
AT1G28690	PCMP-E34
AT1G28760	AT1G28760
AT1G28960	NUDT15
AT1G29020	AT1G29020
AT1G29050	TBL38
AT1G29060	AT1G29060
AT1G29120	AT1G29120
AT1G29150	RPN6
AT1G29160	DOF1.5
AT1G29170	SCAR3
AT1G29179	AT1G29179
AT1G29195	AT1G29195
AT1G29230	CIPK18
AT1G29240	AT1G29240
AT1G29250	AT1G29250
AT1G29270	AT1G29270
AT1G29280	WRKY65
AT1G29290	AT1G29290
AT1G29300	UNE1
AT1G29310	AT1G29310
AT1G29330	ERD2A
AT1G29340	PUB17
AT1G29390	COR413IM2
AT1G29400	ML5
AT1G29440	SAUR63
AT1G29470	AT1G29470
AT1G29530	AT1G29530
AT1G29600	AT1G29600
AT1G29640	AT1G29640
AT1G29660	AT1G29660
AT1G29670	AT1G29670
AT1G29680	AT1G29680
AT1G29690	CAD1
AT1G29760	AT1G29760
AT1G29810	AT1G29810
AT1G29840	AT1G29840
AT1G29850	AT1G29850
AT1G29880	GLYRS-1
AT1G29900	CARB
AT1G29920	LHCB1.2
AT1G29930	LHCB1.3
AT1G29960	AT1G29960
AT1G29980	AT1G29980
AT1G30016	AT1G30016
AT1G30020	AT1G30020
AT1G30040	GA2OX2
AT1G30050	AT1G30050
AT1G30080	AT1G30080
AT1G30100	NCED5
AT1G30110	NUDT25
AT1G30120	PDH-E1 BETA
AT1G30135	TIFY5A
AT1G30190	AT1G30190
AT1G30200	AT1G30200
AT1G30250	AT1G30250
AT1G30260	AT1G30260
AT1G30270	CIPK23
AT1G30280	AT1G30280
AT1G30290	AT1G30290
AT1G30310	AT1G30310
AT1G30320	AT1G30320
AT1G30330	ARF6
AT1G30340	AT1G30340
AT1G30350	AT1G30350
AT1G30360	ERD4
AT1G30370	AT1G30370
AT1G30400	ABCC1
AT1G30410	ATMRP13
AT1G30450	CCC1
AT1G30475	AT1G30475
AT1G30490	ATHB-9
AT1G30500	NFYA7
AT1G30510	RFNR2
AT1G30530	UGT78D1
AT1G30550	AT1G30550
AT1G30570	HERK2
AT1G30610	EMB2279
AT1G30620	MUR4
AT1G30650	WRKY14
AT1G30660	T5I8.11
AT1G30690	PATL4
AT1G30700	AT1G30700
AT1G30720	AT1G30720
AT1G30755	AT1G30755
AT1G30757	AT1G30757
AT1G30760	AT1G30760
AT1G30780	AT1G30780
AT1G30810	JMJ18
AT1G30820	AT1G30820
AT1G30825	ARPC2A
AT1G30835	SADHU1-2
AT1G30840	PUP4
AT1G30860	AT1G30860
AT1G30900	VSR6
AT1G31010	OSB4
AT1G31030	AT1G31030
AT1G31040	AT1G31040
AT1G31070	GLCNAC1PUT1
AT1G31120	POT10
AT1G31130	AT1G31130
AT1G31150	AT1G31150
AT1G31173	MIR167D
AT1G31290	AGO3
AT1G31310	AT1G31310
AT1G31320	LBD4
AT1G31330	PSAF
AT1G31350	SKIP25
AT1G31355	AT1G31355
AT1G31358	AT1G31358
AT1G31410	AT1G31410
AT1G31470	NFD4
AT1G31540	AT1G31540
AT1G31550	AT1G31550
AT1G31580	ECS1
AT1G31650	ROPGEF14
AT1G31710	AT1G31710
AT1G31720	AT1G31720
AT1G31730	AT1G31730
AT1G31760	AT1G31760
AT1G31780	AT1G31780
AT1G31790	PCMP-A1
AT1G31812	ACBP6
AT1G31830	AT1G31830
AT1G31835	AT1G31835
AT1G31850	AT1G31850
AT1G31860	HISN2
AT1G31880	BRX
AT1G31910	AT1G31910
AT1G31940	AT1G31940
AT1G32049	AT1G32049
AT1G32060	PRK
AT1G32090	AT1G32090
AT1G32100	PRR1
AT1G32120	AT1G32120
AT1G32150	bZIP68
AT1G32170	XTH30
AT1G32180	CSLD6
AT1G32190	AT1G32190
AT1G32200	ATS1
AT1G32210	DAD1
AT1G32230	RCD1
AT1G32240	KAN2
AT1G32290	AT1G32290
AT1G32340	NHL8
AT1G32360	AT1G32360
AT1G32380	PRS2
AT1G32400	TOM2A
AT1G32410	AT1G32410
AT1G32450	NPF7.3
AT1G32460	AT1G32460
AT1G32500	ABCI7
AT1G32530	MIP1
AT1G32540	LOL1
AT1G32550	FdC1
AT1G32610	AT1G32610
AT1G32640	MYC2
AT1G32650	AT1G32650
AT1G32670	AT1G32670
AT1G32690	AT1G32690
AT1G32700	AT1G32700
AT1G32710	AT1G32710
AT1G32730	AT1G32730
AT1G32740	AT1G32740
AT1G32760	AT1G32760
AT1G32770	AT1G32770
AT1G32780	AT1G32780
AT1G32860	AT1G32860
AT1G32900	GBSS1
AT1G32910	AT1G32910
AT1G32930	B3GALT6
AT1G33060	NAC014
AT1G33110	AT1G33110
AT1G33170	AT1G33170
AT1G33230	AT1G33230
AT1G33240	AT-GTL1
AT1G33250	AT1G33250
AT1G33260	AT1G33260
AT1G33270	AT1G33270
AT1G33280	BRN1
AT1G33290	AT1G33290
AT1G33350	PCMP-E57
AT1G33420	AT1G33420
AT1G33470	AT1G33470
AT1G33560	ADR1
AT1G33590	AT1G33590
AT1G33600	AT1G33600
AT1G33607	AT1G33607
AT1G33610	AT1G33610
AT1G33680	AT1G33680
AT1G33700	AT1G33700
AT1G33730	CYP76C5
AT1G33760	ERF022
AT1G33780	AT1G33780
AT1G33785	AT1G33785
AT1G33800	GXM3
AT1G33810	AT1G33810
AT1G33811	AT1G33811
AT1G33960	AIG1
AT1G33970	AT1G33970
AT1G33990	MES14
AT1G34000	OHP2
AT1G34030	RPS18A
AT1G34040	TAR3
AT1G34044	AT1G34044
AT1G34060	TAR4
AT1G34210	SERK2
AT1G34245	EPF2
AT1G34315	AT1G34315
AT1G34340	AT1G34340
AT1G34350	AT1G34350
AT1G34360	AT1G34360
AT1G34370	STOP1
AT1G34420	AT1G34420
AT1G34570	AT1G34570
AT1G34630	AT1G34630
AT1G34670	AtMYB93
AT1G34750	AT1G34750
AT1G34844	AT1G34844
AT1G35110	AT1G35110
AT1G35140	EXL1
AT1G35160	GRF4
AT1G35190	AT1G35190
AT1G35210	AT1G35210
AT1G35220	AT1G35220
AT1G35250	AT1G35250
AT1G35255	AT1G35255
AT1G35320	AT1G35320
AT1G35330	ATL34
AT1G35333	AT1G35333
AT1G35350	PHO1-H8
AT1G35430	AT1G35430
AT1G35460	BHLH80
AT1G35510	AT1G35510
AT1G35513	AT1G35513
AT1G35516	AT1G35516
AT1G35560	TCP23
AT1G35570	AT1G35570
AT1G35580	CINV1
AT1G35610	AT1G35610
AT1G35670	CPK11
AT1G35720	ANN1
AT1G35730	APUM9
AT1G35750	AT1G35750
AT1G35780	AT1G35780
AT1G35830	AT1G35830
AT1G35910	TPPD
AT1G36060	ERF055
AT1G36070	AT1G36070
AT1G36180	ACC2
AT1G36370	SHM7
AT1G36622	AT1G36622
AT1G36936	AT1G36936
AT1G36940	AT1G36940
AT1G37120	AT1G37120
AT1G37130	NIA2
AT1G37140	MCT1
AT1G38131	AT1G38131
AT1G38140	AT1G38140
AT1G38149	AT1G38149
AT1G40104	AT1G40104
AT1G41830	SKS6
AT1G42550	PMI1
AT1G42990	BZIP60
AT1G43000	AT1G43000
AT1G43160	RAP2-6
AT1G43560	Aty2
AT1G43580	AT1G43580
AT1G43670	AT1G43670
AT1G43700	VIP1
AT1G43710	SDC
AT1G43800	S-ACP-DES6
AT1G43850	SEU
AT1G43886	AT1G43886
AT1G43890	RABC1
AT1G43910	AT1G43910
AT1G43930	AT1G43930
AT1G43980	PCMP-E58
AT1G44000	SGRL
AT1G44080	AT1G44080
AT1G44100	AAP5
AT1G44170	ALDH3H1
AT1G44318	HEMB2
AT1G44350	ILL6
AT1G44446	CAO
AT1G44575	PSBS
AT1G44750	PUP11
AT1G44760	AT1G44760
AT1G44790	AT1G44790
AT1G44800	AT1G44800
AT1G44810	AT1G44810
AT1G44830	ERF014
AT1G44890	AT1G44890
AT1G45010	AT1G45010
AT1G45130	BGAL5
AT1G45145	TRX5
AT1G45160	IRE4
AT1G45170	OEP24A
AT1G45207	AT1G45207
AT1G45249	ABF2
AT1G45474	LHCA5
AT1G45688	AT1G45688
AT1G45976	SBP1
AT1G46264	HSFB4
AT1G46480	WOX4
AT1G46554	AT1G46554
AT1G46768	RAP2-1
AT1G47128	RD21A
AT1G47200	WPP2
AT1G47240	NRAMP2
AT1G47310	AT1G47310
AT1G47330	CBSDUF7
AT1G47380	AT1G47380
AT1G47480	CXE2
AT1G47490	RBP47C
AT1G47497	AT1G47497
AT1G47510	AT5PTASE11
AT1G47520	AT1G47520
AT1G47530	AT1G47530
AT1G47560	SEC3B
AT1G47570	AT1G47570
AT1G47578	AT1G47578
AT1G47600	TGG4
AT1G47610	AT1G47610
AT1G47710	AT1G47710
AT1G47720	OSB1
AT1G47860	AT1G47860
AT1G47890	AtRLP7
AT1G47970	AT1G47970
AT1G47990	GA2OX4
AT1G48000	MYB112
AT1G48090	AT1G48090
AT1G48100	AT1G48100
AT1G48110	ECT7
AT1G48200	AT1G48200
AT1G48240	NPSN12
AT1G48260	CIPK17
AT1G48280	AT1G48280
AT1G48300	AT1G48300
AT1G48320	DHNAT1
AT1G48330	AT1G48330
AT1G48370	YSL8
AT1G48410	AGO1
AT1G48450	AT1G48450
AT1G48480	RKL1
AT1G48500	TIFY6A
AT1G48510	AT1G48510
AT1G48580	AT1G48580
AT1G48610	AT1G48610
AT1G48620	HON5
AT1G48630	RACK1B
AT1G48690	AT1G48690
AT1G48742	AT1G48742
AT1G48745	AT1G48745
AT1G48790	AMSH1
AT1G48870	AT1G48870
AT1G48880	TBL7
AT1G48953	AT1G48953
AT1G49000	AT1G49000
AT1G49005	CLE11
AT1G49010	AT1G49010
AT1G49032	AT1G49032
AT1G49130	COL8
AT1G49160	WNK7
AT1G49200	ATL75
AT1G49210	ATL76
AT1G49230	ATL78
AT1G49240	ACT8
AT1G49320	ATUSPL1
AT1G49435	AT1G49435
AT1G49450	AT1G49450
AT1G49500	AT1G49500
AT1G49520	AT1G49520
AT1G49560	AT1G49560
AT1G49580	CRK8
AT1G49600	RBP47A
AT1G49610	AT1G49610
AT1G49620	KRP7
AT1G49710	FUT12
AT1G49720	ABF1
AT1G49730	AT1G49730
AT1G49750	AT1G49750
AT1G49780	PUB26
AT1G49832	AT1G49832
AT1G49840	AT1G49840
AT1G49850	AT1G49850
AT1G49870	AT1G49870
AT1G49890	QWRF2
AT1G49900	AT1G49900
AT1G49950	TRB1
AT1G50000	AT1G50000
AT1G50020	AT1G50020
AT1G50040	AT1G50040
AT1G50055	TAS1B
AT1G50100	AT1G50100
AT1G50110	BCAT6
AT1G50170	ATSIRB
AT1G50260	NTMC2T5.1
AT1G50280	AT1G50280
AT1G50290	AT1G50290
AT1G50320	ATHX
AT1G50420	SCL3
AT1G50460	HKL1
AT1G50480	THFS
AT1G50560	CYP705A25
AT1G50570	AT1G50570
AT1G50575	AT1G50575
AT1G50590	AT1G50590
AT1G50600	SCL5
AT1G50630	AT1G50630
AT1G50650	AT1G50650
AT1G50740	FAX5
AT1G50890	SP2L
AT1G50954	AT1G50954
AT1G50990	AT1G50990
AT1G51060	HTA10
AT1G51090	AT1G51090
AT1G51130	NSE4A
AT1G51140	BHLH122
AT1G51160	AT1G51160
AT1G51170	UNC
AT1G51175	AT1G51175
AT1G51190	PLT2
AT1G51210	AT1G51210
AT1G51270	PVA14
AT1G51300	AT1G51300
AT1G51355	AT1G51355
AT1G51360	ATDABB1
AT1G51390	NIFU5
AT1G51400	AT1G51400
AT1G51460	ABCG13
AT1G51470	TGG5
AT1G51480	AT1G51480
AT1G51500	ABCG12
AT1G51520	AT1G51520
AT1G51530	AT1G51530
AT1G51550	AT1G51550
AT1G51590	MNS1
AT1G51660	MKK4
AT1G51680	4CL1
AT1G51690	PP2AB1
AT1G51700	DOF1.7
AT1G51710	UBP6
AT1G51760	ILL4
AT1G51780	ILL5
AT1G51790	AT1G51790
AT1G51800	AT1G51800
AT1G51805	AT1G51805
AT1G51840	AT1G51840
AT1G51850	AT1G51850
AT1G51860	AT1G51860
AT1G51940	LYK3
AT1G51950	IAA18
AT1G52000	JAL5
AT1G52080	AR791
AT1G52110	AT1G52110
AT1G52120	JAL12
AT1G52140	AT1G52140
AT1G52150	ATHB-15
AT1G52180	AT1G52180
AT1G52185	AT1G52185
AT1G52190	NPF1.2
AT1G52200	PCR8
AT1G52220	CURT1C
AT1G52240	ATROPGEF11
AT1G52280	RABG3D
AT1G52290	PERK15
AT1G52300	RPL37B
AT1G52330	AT1G52330
AT1G52340	ABA2
AT1G52347	AT1G52347
AT1G52410	TSA1
AT1G52430	AT1G52430
AT1G52450	AT1G52450
AT1G52510	AT1G52510
AT1G52540	AT1G52540
AT1G52565	AT1G52565
AT1G52590	AT1G52590
AT1G52615	AT1G52615
AT1G52710	AT1G52710
AT1G52740	HTA9
AT1G52750	AT1G52750
AT1G52760	CSE
AT1G52780	AT1G52780
AT1G52800	AT1G52800
AT1G52855	AT1G52855
AT1G52857	AT1G52857
AT1G52880	NAC018
AT1G52890	NAC019
AT1G52905	AT1G52905
AT1G52990	AT1G52990
AT1G53035	AT1G53035
AT1G53040	AT1G53040
AT1G53050	AT1G53050
AT1G53060	AT1G53060
AT1G53070	AT1G53070
AT1G53080	AT1G53080
AT1G53110	PPI4
AT1G53130	GRI
AT1G53160	SPL4
AT1G53163	AT1G53163
AT1G53165	ATMAP4K ALPHA1
AT1G53170	ERF8
AT1G53180	AT1G53180
AT1G53190	AT1G53190
AT1G53210	AT1G53210
AT1G53220	AT1G53220
AT1G53230	TCP3
AT1G53240	mMDH1
AT1G53280	DJ1B
AT1G53290	B3GALT14
AT1G53300	TTL1
AT1G53310	PPC1
AT1G53320	TULP7
AT1G53325	AT1G53325
AT1G53340	AT1G53340
AT1G53380	AT1G53380
AT1G53400	AT1G53400
AT1G53430	AT1G53430
AT1G53440	AT1G53440
AT1G53460	AT1G53460
AT1G53470	MSL4
AT1G53500	RHM2
AT1G53510	MPK18
AT1G53560	AT1G53560
AT1G53570	MAP3KA
AT1G53580	GLY3
AT1G53590	NTMC2T6.1
AT1G53600	PCMP-E63
AT1G53610	AT1G53610
AT1G53620	AT1G53620
AT1G53625	AT1G53625
AT1G53640	AT1G53640
AT1G53670	MSRB1
AT1G53690	NRPB12L
AT1G53700	WAG1
AT1G53730	SRF6
AT1G53750	RPT1A
AT1G53770	AT1G53770
AT1G53785	AT1G53785
AT1G53790	AT1G53790
AT1G53820	AT1G53820
AT1G53840	PME1
AT1G53850	PAE1
AT1G53860	AT1G53860
AT1G53887	AT1G53887
AT1G53920	GLIP5
AT1G53980	AT1G53980
AT1G53990	GLIP3
AT1G54000	GLL22
AT1G54010	GLL23
AT1G54020	AT1G54020
AT1G54030	MVP1
AT1G54050	HSP17.4B
AT1G54070	AT1G54070
AT1G54080	UBP1A
AT1G54090	ATEXO70D2
AT1G54095	AT1G54095
AT1G54100	ALDH7B4
AT1G54120	AT1G54120
AT1G54130	RSH3
AT1G54140	TAF9
AT1G54160	NFYA5
AT1G54170	CID3
AT1G54180	BRXL3
AT1G54200	AT1G54200
AT1G54210	ATG12A
AT1G54220	AT1G54220
AT1G54270	TIF4A-2
AT1G54320	ALIS3
AT1G54340	ICDH
AT1G54385	AT1G54385
AT1G54390	ING2
AT1G54410	AT1G54410
AT1G54450	B''DELTA
AT1G54460	AT1G54460
AT1G54520	AT1G54520
AT1G54530	AT1G54530
AT1G54575	AT1G54575
AT1G54670	AT1G54670
AT1G54690	HTA3
AT1G54710	ATG18H
AT1G54740	AT1G54740
AT1G54780	TLP18.3
AT1G54820	AT1G54820
AT1G54840	IDM2
AT1G54990	AXR4
AT1G55010	PDF1.5
AT1G55020	LOX1
AT1G55100	AT1G55100
AT1G55110	IDD7
AT1G55120	CWINV3
AT1G55140	AT1G55140
AT1G55152	AT1G55152
AT1G55205	AT1G55205
AT1G55210	DIR20
AT1G55240	AT1G55240
AT1G55250	HUB2
AT1G55260	AT1G55260
AT1G55265	AT1G55265
AT1G55270	AT1G55270
AT1G55300	TAF7
AT1G55330	AGP21
AT1G55340	AT1G55340
AT1G55350	DEK1
AT1G55360	AT1G55360
AT1G55365	AT1G55365
AT1G55410	AT1G55410
AT1G55420	EDA11
AT1G55440	AT1G55440
AT1G55450	AT1G55450
AT1G55480	ZKT
AT1G55510	BCDH BETA1
AT1G55520	TBP2
AT1G55530	AT1G55530
AT1G55535	AT1G55535
AT1G55550	AT1G55550
AT1G55580	SCL18
AT1G55604	AT1G55604
AT1G55610	BRL1
AT1G55660	AT1G55660
AT1G55670	PSAG
AT1G55690	SFH13
AT1G55700	AT1G55700
AT1G55730	CAX5
AT1G55740	RFS1
AT1G55750	TFB1-1
AT1G55760	AT1G55760
AT1G55790	AT1G55790
AT1G55805	BOLA1
AT1G55820	AT1G55820
AT1G55840	AT1G55840
AT1G55850	CSLE1
AT1G55880	AT1G55880
AT1G55910	ZIP11
AT1G55920	SAT1
AT1G55960	AT1G55960
AT1G55970	HAC04
AT1G56010	NAC021
AT1G56020	AT1G56020
AT1G56030	AT1G56030
AT1G56040	PUB58
AT1G56080	AT1G56080
AT1G56090	AT1G56090
AT1G56120	AT1G56120
AT1G56130	AT1G56130
AT1G56140	AT1G56140
AT1G56145	AT1G56145
AT1G56150	SAUR71
AT1G56160	AT1G56160
[truncated: 9,892 more rows]

## Sheet: VAL1VAL2-direct repress target
		log2(TMP+1)						log2((TPM_mutant+1)/(TPM_WT+1))
ID	name	WT	val1 val2-ne	val1 val2-e	val1 val2 fus3	fus3		val1 val2-ne	val1 val2-e	val1 val2 fus3	fus3
AT4G27160	2S3	0	10.3375	14.3762	6.15203	0.0404749		10.3375	14.3762	6.15203	0.0404749
AT5G44120	CRA1	0.191124	10.1072	13.8473	4.18126	0.0737284		9.91607	13.6562	3.99014	-0.117395
AT4G27170	2S4	0	10.7263	13.5892	3.26262	0.0272834		10.7263	13.5892	3.26262	0.0272834
AT4G27140	2S1	0.158712	8.21329	12.9304	6.06463	0		8.05458	12.7717	5.90592	-0.158712
AT4G25140	OLEO1	0.0300432	8.85179	12.718	3.28031	0.0581294		8.82175	12.6879	3.25026	0.0280863
AT1G03880	CRB	0.0170724	8.35656	11.5546	1.28452	0.0122025		8.33949	11.5375	1.26744	-0.00486993
AT5G51210	OLEO3	0.326729	6.4465	10.5514	2.81748	0.209802		6.11977	10.2246	2.49076	-0.116927
AT4G36700	AT4G36700	0	5.6937	9.95245	0.687745	0.0436623		5.6937	9.95245	0.687745	0.0436623
AT1G75830	PDF1.1	0	6.12956	9.58185	3.69471	1.75672		6.12956	9.58185	3.69471	1.75672
AT3G21720	ICL	0.912444	6.19593	10.3876	4.38556	2.02915		5.28349	9.47517	3.47311	1.11671
AT5G07190	ATS3	0.310649	5.96053	9.5819	1.15327	0.629673		5.64988	9.27125	0.842618	0.319024
AT4G15210	BAM5	0.13681	2.34412	9.34378	1.68711	1.46451		2.20731	9.20697	1.5503	1.3277
AT3G54940	AT3G54940	0	6.01113	9.20461	1.98373	0.0164326		6.01113	9.20461	1.98373	0.0164326
AT3G15670	AT3G15670	0.0514784	5.58917	9.18036	1.94026	0.195424		5.5377	9.12888	1.88879	0.143945
AT3G27660	OLEO4	1.92399	6.98272	10.8565	3.68803	1.61411		5.05872	8.93247	1.76403	-0.309885
AT3G17520	AT3G17520	0.0463132	5.30315	8.7587	2.27399	0.0873814		5.25684	8.71239	2.22768	0.0410682
AT3G51810	EM1	0.049917	5.62144	8.49669	0.476935	0		5.57152	8.44677	0.427018	-0.049917
AT1G62290	APA2	1.62587	7.02121	10.0456	6.06538	4.10292		5.39534	8.41969	4.43951	2.47705
AT5G01300	AT5G01300	0	4.89758	8.38765	1.87633	0.287056		4.89758	8.38765	1.87633	0.287056
AT2G38530	LTP2	4.95521	9.63621	12.8879	8.81999	5.43537		4.681	7.93274	3.86478	0.480164
AT1G43800	S-ACP-DES6	0.422988	4.19919	8.18261	4.94202	6.20197		3.7762	7.75962	4.51904	5.77899
AT5G62800	AT5G62800	0	4.20121	7.70859	0.83322	0.0187946		4.20121	7.70859	0.83322	0.0187946
AT1G03106	AT1G03106	0.457457	7.69912	8.10479	8.17919	0.381656		7.24167	7.64733	7.72173	-0.0758008
AT2G36640	ATECP63	0.218729	5.05703	7.81296	0.972064	0.0429455		4.83831	7.59423	0.753336	-0.175783
AT4G31830	AT4G31830	0	4.15935	7.58428	0.737241	0		4.15935	7.58428	0.737241	0
AT1G67100	LBD40	0	4.15933	7.53878	1.76606	0.985711		4.15933	7.53878	1.76606	0.985711
AT1G07645	ATDSI-1VOC	0	4.01656	7.53169	2.03004	0		4.01656	7.53169	2.03004	0
AT2G40170	EM6	0.121114	3.31366	7.47053	1.44147	0.516714		3.19255	7.34941	1.32035	0.395601
AT2G41260	M17	0	4.62148	7.34293	4.71552	0		4.62148	7.34293	4.71552	0
AT4G03050	AOP3	0	3.20238	7.32852	0.0752871	0		3.20238	7.32852	0.0752871	0
AT4G10020	HSD5	0.157519	4.59092	7.45491	3.47414	0.165773		4.4334	7.29739	3.31662	0.00825369
AT2G44470	BGLU29	0	3.89984	7.2964	0.356488	0.013559		3.89984	7.2964	0.356488	0.013559
AT2G35300	LEA18	1.24341	5.82175	8.49086	3.15107	1.066		4.57833	7.24745	1.90766	-0.177409
AT2G31980	CYS2	1.07075	5.47853	8.20596	3.56555	1.72649		4.40777	7.13521	2.4948	0.655741
AT3G53040	AT3G53040	0.196375	3.70557	7.31515	1.60616	0.174314		3.50919	7.11878	1.40979	-0.0220614
AT1G62710	bVPE	1.4201	4.9525	8.43689	3.43307	3.19134		3.5324	7.01678	2.01297	1.77124
AT5G59170	AT5G59170	0.281474	3.38331	7.27055	1.63379	0.259465		3.10184	6.98907	1.35232	-0.0220094
AT5G20790	AT5G20790	0.637765	2.57746	7.58708	6.90056	7.58374		1.9397	6.94932	6.2628	6.94598
AT1G77120	ADH1	2.39171	5.60429	9.28724	5.72316	7.18861		3.21258	6.89553	3.33145	4.7969
AT1G77655	AT1G77655	0	4.37301	6.8192	3.57993	0		4.37301	6.8192	3.57993	0
AT2G33520	AT2G33520	0.0775165	3.33945	6.81953	1.59917	0.222899		3.26193	6.74201	1.52166	0.145382
AT4G33070	PDC1	1.22519	5.13301	7.90326	4.63437	6.38647		3.90782	6.67806	3.40918	5.16128
AT5G03795	AT5G03795	0.452582	3.40691	7.12477	1.06502	1.08687		2.95433	6.67219	0.612442	0.634291
AT3G24650	ABI3	0.0168628	3.4475	6.63188	0.318337	0.00943795		3.43064	6.61502	0.301474	-0.00742488
AT5G07330	AT5G07330	0.592211	4.20737	7.20423	1.37365	0.184221		3.61516	6.61202	0.781435	-0.407991
AT5G07500	PEI1	0.0887802	3.19715	6.68769	1.83151	0.211792		3.10837	6.59891	1.74273	0.123012
AT1G61800	GPT2	0.940698	4.06698	7.47436	2.84591	2.55848		3.12628	6.53366	1.90521	1.61778
AT4G10270	AT4G10270	0.340874	2.8518	6.8553	3.49037	5.28009		2.51093	6.51443	3.14949	4.93921
AT1G32710	AT1G32710	0	3.39273	6.39311	0.922302	0.0622475		3.39273	6.39311	0.922302	0.0622475
AT1G29680	AT1G29680	0.218494	3.04588	6.60099	1.69192	0.525078		2.82739	6.3825	1.47343	0.306583
AT2G02990	RNS1	0.194875	1.97561	6.57073	3.04281	3.30369		1.78073	6.37586	2.84793	3.10881
AT4G05110	ENT6	0.129923	2.58231	6.44723	0.416267	0.221144		2.45239	6.31731	0.286344	0.0912207
AT5G24130	AT5G24130	0.0217858	4.70355	6.33502	4.58712	0.0175808		4.68176	6.31323	4.56534	-0.00420492
AT3G03341	AT3G03341	0.447661	4.57013	6.73837	1.84137	0.401654		4.12247	6.29071	1.39371	-0.0460076
AT1G02770	AT1G02770	0.929423	6.14126	7.13445	5.96539	1.23095		5.21184	6.20502	5.03597	0.301524
AT4G11040	RDO5	0.0515276	3.17864	6.23851	0.564964	0.319088		3.12712	6.18698	0.513437	0.267561
AT1G68170	AT1G68170	0.243208	2.61426	6.23817	1.1264	0.538252		2.37105	5.99496	0.883191	0.295044
AT1G18100	MFT	0.928394	4.23839	6.8383	3.45029	2.01511		3.31	5.9099	2.5219	1.08672
AT5G45830	DOG1	0.370269	3.33946	6.24897	3.05166	1.83588		2.9692	5.8787	2.68139	1.46561
AT1G68320	MYB62	0.221776	3.08126	6.08837	1.82052	1.77329		2.85949	5.86659	1.59875	1.55151
AT5G45880	AT5G45880	0.03131	2.8126	5.88987	0.825293	0.0907306		2.78129	5.85856	0.793983	0.0594206
AT3G55240	AT3G55240	0.270553	3.7681	6.10695	4.00587	1.52572		3.49755	5.83639	3.73532	1.25517
AT1G72100	AT1G72100	0.0429034	2.87954	5.87124	0.707717	0.0386338		2.83663	5.82834	0.664813	-0.00426967
AT5G57123	AT5G57123	0.794436	4.28425	6.53351	1.98145	1.34955		3.48982	5.73907	1.18702	0.555112
AT3G47420	ATPS3	1.24493	3.0869	6.93495	6.26673	6.61129		1.84196	5.69002	5.0218	5.36636
AT4G14780	AT4G14780	1.16	4.74479	6.84519	4.17718	1.46102		3.58479	5.68519	3.01719	0.30102
AT3G15280	AT3G15280	0	2.7578	5.60848	0.569922	0.0389062		2.7578	5.60848	0.569922	0.0389062
AT2G33070	NSP2	0.0869477	3.08633	5.66877	3.21711	0.189663		2.99938	5.58182	3.13017	0.102715
AT5G57390	AIL5	1.40971	4.03254	6.98362	3.1223	1.77457		2.62283	5.5739	1.71259	0.364861
AT5G39890	PCO2	1.13548	4.28217	6.69829	4.29343	4.67345		3.14669	5.56281	3.15795	3.53797
AT1G06080	ADS1	1.45505	4.32899	6.96265	3.10588	3.81222		2.87395	5.5076	1.65083	2.35717
AT1G70260	AT1G70260	0	1.96096	5.42179	1.09965	0.483786		1.96096	5.42179	1.09965	0.483786
AT2G21260	AT2G21260	0.586887	3.65724	6.0039	3.50389	0.607414		3.07035	5.41702	2.91701	0.0205264
AT2G39330	JAL23	0.0640592	2.1577	5.40234	0.401822	2.26484		2.09364	5.33828	0.337763	2.20078
AT4G31615	REM2	0.310817	2.94577	5.61479	2.37033	0.465828		2.63495	5.30398	2.05952	0.155011
AT1G51470	TGG5	3.7138	5.49378	9.00842	5.94101	5.94346		1.77998	5.29462	2.22721	2.22966
AT1G73220	45566	0.108801	1.2077	5.37193	2.21843	4.37689		1.0989	5.26313	2.10963	4.26809
AT2G16060	AHB1	2.56444	5.38507	7.8256	4.9829	6.96767		2.82063	5.26116	2.41845	4.40323
AT2G47520	ERF071	0.320686	2.83212	5.57974	1.73361	2.29336		2.51143	5.25905	1.41293	1.97267
AT5G17810	WOX12	0.30173	1.8595	5.54844	1.39788	0.729686		1.55777	5.24671	1.09615	0.427955
AT2G21720	AT2G21720	0	2.30488	5.24249	0.740821	0		2.30488	5.24249	0.740821	0
AT5G39720	AIG2L	0.670809	2.24973	5.88728	1.71427	2.53917		1.57892	5.21647	1.04347	1.86836
AT1G16705	AT1G16705	0.176718	5.5956	5.36685	5.50574	0.585661		5.41889	5.19013	5.32902	0.408943
AT3G49570	LSU3	0.222732	2.4472	5.40563	2.26994	6.24921		2.22446	5.1829	2.04721	6.02648
AT2G26020	PDF1.2B	0.310939	3.63421	5.42547	3.8814	8.55574		3.32327	5.11453	3.57046	8.2448
AT1G25410	IPT6	0	1.32635	5.11004	0.208167	0		1.32635	5.11004	0.208167	0
AT1G68510	LBD42	0.0248081	1.81703	5.12237	0.693405	0.289932		1.79222	5.09756	0.668597	0.265124
AT3G21800	UGT71B8	0.0208049	0.896938	5.10085	0.281196	0.104397		0.876133	5.08004	0.260391	0.0835922
AT1G28640	AT1G28640	0	1.59338	5.0288	0.153648	0		1.59338	5.0288	0.153648	0
AT5G25470	AT5G25470	0.249408	2.90145	5.26899	1.78126	0.418009		2.65205	5.01959	1.53185	0.168601
AT3G17790	PAP17	2.12789	3.94496	7.13249	6.16711	6.95381		1.81707	5.0046	4.03921	4.82591
AT3G14360	AT3G14360	1.73777	3.76875	6.70434	3.1376	2.2864		2.03097	4.96657	1.39982	0.548627
AT1G23730	BCA3	1.75355	5.54592	6.69927	4.65232	6.59525		3.79237	4.94572	2.89877	4.8417
AT4G19380	FAO4A	1.83006	4.8108	6.7713	4.31582	1.50673		2.98074	4.94124	2.48576	-0.32333
AT4G36600	AT4G36600	0.0133041	2.60396	4.94594	0.124116	0		2.59065	4.93264	0.110812	-0.0133041
AT5G55250	IAMT1	1.17165	3.47949	6.0795	3.21328	1.73482		2.30785	4.90786	2.04164	0.563173
AT2G24800	PER18	0.152883	2.30002	5.05039	1.75951	0.310738		2.14714	4.89751	1.60663	0.157854
AT1G17710	AT1G17710	0.294254	1.40541	5.19059	6.06032	7.10806		1.11116	4.89633	5.76607	6.8138
AT2G39510	AT2G39510	0.131407	3.43039	5.02011	2.55803	3.7617		3.29898	4.88871	2.42662	3.6303
AT5G24660	LSU2	1.17391	3.6438	6.00123	4.3038	7.78045		2.46989	4.82732	3.12988	6.60654
AT1G55740	RFS1	2.37214	3.96382	7.17063	3.83422	3.85018		1.59168	4.79848	1.46208	1.47803
AT5G21150	AGO9	0.381535	4.72109	5.10354	4.94574	0.297592		4.33955	4.722	4.56421	-0.083943
AT2G44460	BGLU28	0.760752	2.92143	5.46333	2.51006	4.62701		2.16068	4.70258	1.74931	3.86626
AT3G20470	GRP-5	2.80656	6.2216	7.48406	6.55103	3.73917		3.41503	4.67749	3.74446	0.932605
AT1G53070	AT1G53070	1.77705	4.26031	6.4423	3.30985	3.35052		2.48326	4.66525	1.5328	1.57347
AT1G50110	BCAT6	2.00858	3.65851	6.65925	3.31311	3.17926		1.64992	4.65067	1.30453	1.17068
AT5G22580	AT5G22580	3.58073	6.5032	8.20409	5.94415	4.90724		2.92247	4.62336	2.36342	1.32651
AT5G44220	AT5G44220	0	2.82871	4.6107	2.79448	0.647305		2.82871	4.6107	2.79448	0.647305
AT2G14520	CBSDUF3	1.32013	4.0907	5.91448	3.91605	1.62454		2.77057	4.59435	2.59591	0.304406
AT1G72570	AIL1	0	0.975674	4.58456	0.181571	0		0.975674	4.58456	0.181571	0
AT5G65510	AIL7	0.377532	1.87084	4.94877	0.988398	1.30122		1.49331	4.57124	0.610867	0.923692
AT1G35910	TPPD	0.526973	2.17421	5.09749	1.14185	1.79732		1.64724	4.57051	0.614873	1.27035
AT5G50360	AT5G50360	0.0960248	3.57136	4.66501	0.768385	0.137679		3.47533	4.56898	0.67236	0.0416541
AT5G50260	CEP1	0.206284	1.73299	4.76934	1.02096	1.69156		1.52671	4.56306	0.814678	1.48527
AT5G44420	PDF1.2A	0.402464	2.72799	4.9567	3.37076	7.99275		2.32553	4.55424	2.9683	7.59029
AT5G15120	PCO1	1.35852	3.52943	5.90825	4.2313	4.95556		2.17091	4.54973	2.87278	3.59704
AT5G41460	AT5G41460	1.27239	3.83812	5.77395	3.12784	1.6033		2.56573	4.50156	1.85545	0.330904
AT2G26440	PME12	2.86383	4.77648	7.35434	4.42363	4.78983		1.91265	4.4905	1.55979	1.926
AT5G44700	GSO2	0.457796	1.77672	4.94326	1.0598	1.32422		1.31893	4.48546	0.602003	0.866426
AT1G23110	AT1G23110	0.241174	1.17045	4.71621	4.17358	4.51582		0.929275	4.47504	3.93241	4.27464
AT5G61610	AT5G61610	0.749366	3.46616	5.22402	3.1878	3.07644		2.71679	4.47465	2.43843	2.32708
AT5G13790	AGL15	2.35312	4.83992	6.82048	5.08068	2.38982		2.4868	4.46736	2.72755	0.036698
AT5G10140	FLC	2.8343	5.99029	7.28325	4.92969	2.31458		3.15598	4.44895	2.09538	-0.519727
AT5G65080	MAF5	0.841009	5.61922	5.28248	5.51761	1.1159		4.77821	4.44147	4.6766	0.274893
AT3G08860	PYD4	0.536979	4.08896	4.97666	3.05752	5.73849		3.55198	4.43968	2.52054	5.20151
AT2G32830	PHT1-5	0.273917	1.68394	4.69816	1.42954	1.79917		1.41003	4.42424	1.15562	1.52526
AT3G03660	WOX11	0.129295	2.47977	4.55112	1.1358	1.367		2.35048	4.42182	1.00651	1.2377
AT5G16460	AT5G16460	0	1.6248	4.41446	0.348482	0		1.6248	4.41446	0.348482	0
AT3G01600	anac044	0.552613	3.32293	4.95475	2.93167	0.895494		2.77032	4.40214	2.37905	0.342881
AT2G14247	AT2G14247	1.31029	5.64956	5.67636	3.15218	2.98463		4.33927	4.36607	1.84189	1.67434
AT1G64405	AT1G64405	0.628648	4.029	4.99275	4.07169	3.65687		3.40035	4.3641	3.44304	3.02822
AT2G45290	TKL-2	2.92266	4.98453	7.28432	5.0037	4.39856		2.06187	4.36166	2.08103	1.4759
AT3G11260	WOX5	0.829443	3.55929	5.16819	2.98088	1.54453		2.72984	4.33875	2.15144	0.715087
AT1G80130	AT1G80130	0.34702	3.9122	4.67665	2.48057	0.821642		3.56518	4.32963	2.13355	0.474623
AT4G25330	AT4G25330	0.040358	2.87648	4.36422	2.76957	0.0380906		2.83613	4.32386	2.72921	-0.00226746
AT4G12470	AZI1	4.553	8.54429	8.87309	8.84939	7.1318		3.99129	4.32008	4.29639	2.5788
AT3G54510	AT3G54510	0.161163	1.63597	4.47975	0.920509	0.143479		1.4748	4.31859	0.759346	-0.0176844
AT1G12070	AT1G12070	0.413404	4.29864	4.7128	4.69919	0.597306		3.88523	4.29939	4.28579	0.183901
AT1G25530	AT1G25530	2.24557	4.00599	6.5346	3.66344	3.3957		1.76042	4.28903	1.41788	1.15014
AT1G23070	AT1G23070	0	1.54606	4.28567	0.330826	0.0726784		1.54606	4.28567	0.330826	0.0726784
AT3G05150	AT3G05150	1.88171	4.94249	6.15706	5.74923	2.74687		3.06078	4.27535	3.86752	0.86516
AT5G66985	AT5G66985	1.62958	4.02596	5.87004	4.45928	5.25757		2.39638	4.24046	2.8297	3.62799
AT5G07530	GRP17	0	0.338296	4.22884	0.215443	0.0147623		0.338296	4.22884	0.215443	0.0147623
AT1G11370	PME56	0.0357764	2.23889	4.25565	2.48993	0.496399		2.20311	4.21988	2.45416	0.460623
AT3G16150	AT3G16150	1.91066	3.36239	6.12712	3.35772	1.62793		1.45173	4.21647	1.44707	-0.282729
AT5G16023	RTFL18	0.0401649	0.549537	4.23865	1.49677	0.201589		0.509372	4.19848	1.45661	0.161424
AT3G08040	FRD3	1.94418	3.39229	6.12967	3.1286	2.32109		1.44811	4.18549	1.18442	0.376908
AT3G22550	AT3G22550	1.91213	4.05574	6.07541	3.25226	3.66031		2.14361	4.16327	1.34013	1.74818
AT4G15396	CYP702A6	0.834975	3.0659	4.99257	2.62045	2.44461		2.23092	4.15759	1.78548	1.60964
AT3G23060	AT3G23060	0.0688904	2.98198	4.18603	3.23172	0.0370987		2.91309	4.11714	3.16283	-0.0317917
AT4G23680	AT4G23680	5.39393	8.30992	9.50621	8.02955	6.1745		2.91599	4.11228	2.63562	0.780565
AT2G42660	AT2G42660	1.0859	2.96027	5.16947	2.45801	2.33953		1.87437	4.08357	1.37211	1.25363
AT5G11320	YUC4	0.318529	2.13939	4.38436	1.34852	0.464631		1.82086	4.06583	1.02999	0.146102
AT3G53232	RTFL1	0.607026	2.46008	4.6579	1.63065	1.97267		1.85305	4.05088	1.02362	1.36565
AT4G19810	AT4G19810	2.08919	4.6607	6.12527	4.96979	5.37421		2.57151	4.03608	2.8806	3.28502
AT3G15370	EXPA12	0.176662	0.941798	4.20372	1.2652	1.06347		0.765136	4.02706	1.08854	0.886812
AT5G02760	AT5G02760	1.39305	4.14717	5.4129	4.39317	4.47938		2.75412	4.01985	3.00012	3.08633
AT3G15720	AT3G15720	0.983491	3.46876	4.99132	2.53779	1.93123		2.48527	4.00783	1.5543	0.947738
AT5G51850	AT5G51850	0.4298	2.0099	4.43672	1.65727	1.20371		1.5801	4.00692	1.22747	0.773905
AT4G25980	PER43	1.0069	2.18819	5.00383	1.92967	1.26491		1.18129	3.99693	0.922768	0.258017
AT4G12490	AT4G12490	0.889636	3.31612	4.87939	1.77785	3.84007		2.42648	3.98976	0.88821	2.95044
AT2G47050	AT2G47050	0.05468	1.67322	4.03312	0.948437	0.0754295		1.61854	3.97844	0.893757	0.0207495
AT3G21860	ASK10	0	1.48784	3.97056	1.10476	1.0307		1.48784	3.97056	1.10476	1.0307
AT2G19770	PRO4	0	0.999408	3.96637	1.83206	0.0715023		0.999408	3.96637	1.83206	0.0715023
AT1G14950	AT1G14950	0	0.889307	3.95901	1.26551	0		0.889307	3.95901	1.26551	0
AT1G66360	AT1G66360	0.0288676	0.668826	3.98391	0.320441	0.260381		0.639958	3.95505	0.291574	0.231513
AT1G30530	UGT78D1	2.42817	4.3922	6.36731	4.08268	3.46506		1.96403	3.93914	1.65451	1.03688
AT3G01516	AT3G01516	0.851388	1.87674	4.78891	1.68802	1.87396		1.02535	3.93752	0.836635	1.02258
AT1G68470	AT1G68470	0.826159	2.17918	4.74889	2.2422	2.0496		1.35302	3.92273	1.41604	1.22345
AT4G13210	AT4G13210	0.808639	2.74296	4.724	2.32949	1.27606		1.93432	3.91537	1.52085	0.467422
AT4G16620	AT4G16620	0.697677	2.22047	4.60868	2.23977	3.11459		1.5228	3.911	1.54209	2.41691
AT5G60760	AT5G60760	1.94637	3.17744	5.85182	3.17064	2.72896		1.23107	3.90545	1.22427	0.782589
AT2G41230	ORS1	0.68156	2.66296	4.58365	2.59035	1.938		1.9814	3.9021	1.90879	1.25644
AT1G12200	AT1G12200	4.20936	6.55186	8.09352	5.54314	6.26955		2.3425	3.88417	1.33378	2.06019
AT3G05630	PLDP2	1.21079	3.29817	5.09139	4.39503	4.47407		2.08738	3.8806	3.18424	3.26327
AT4G28090	sks10	0	0.889512	3.87405	0.0501483	0		0.889512	3.87405	0.0501483	0
AT1G01580	FRO2	0.26086	2.58047	4.12471	2.54667	1.0462		2.31961	3.86385	2.28581	0.785338
AT3G19500	BHLH113	0.61322	2.04137	4.46722	1.46575	1.11886		1.42815	3.854	0.852531	0.505643
AT2G29380	HAI3	0.103772	1.34476	3.94955	0.687697	0.127888		1.24099	3.84577	0.583925	0.0241157
AT5G53820	AT5G53820	0.320453	3.28886	4.15436	1.56645	3.14277		2.96841	3.8339	1.24599	2.82232
AT2G16890	UGT90A1	1.51352	3.6594	5.34104	3.40646	2.37344		2.14588	3.82753	1.89295	0.859918
AT5G63350	AT5G63350	0.524712	2.93007	4.3471	1.2634	0.815002		2.40535	3.82239	0.738688	0.29029
AT3G07540	FH10	1.97775	4.46615	5.7761	3.64485	3.76287		2.4884	3.79836	1.6671	1.78512
AT1G06990	AT1G06990	0	0.351841	3.75411	0.191449	0.038881		0.351841	3.75411	0.191449	0.038881
AT3G14880	AT3G14880	0	1.49666	3.7503	0.578342	0.225894		1.49666	3.7503	0.578342	0.225894
AT1G28650	AT1G28650	0	0.622137	3.74643	0.229727	0.0307669		0.622137	3.74643	0.229727	0.0307669
AT5G42830	AT5G42830	0.882262	3.01627	4.61739	2.09151	2.04043		2.13401	3.73513	1.20925	1.15817
AT5G11100	SYT4	1.57237	3.86048	5.30325	3.84066	1.95935		2.28811	3.73088	2.2683	0.386981
AT1G22250	AT1G22250	2.50596	5.69585	6.23564	5.09839	3.34249		3.18989	3.72969	2.59244	0.836539
AT5G38900	AT5G38900	0.981762	3.48987	4.71045	3.39107	3.23733		2.5081	3.72869	2.40931	2.25557
AT3G10040	AT3G10040	1.50282	2.46632	5.22248	2.852	4.04081		0.963498	3.71966	1.34918	2.53799
AT5G41765	AT5G41765	0.130825	2.2758	3.83597	2.84309	0.726373		2.14497	3.70515	2.71227	0.595547
AT1G74990	AT1G74990	0	0.612107	3.69418	0.268841	0		0.612107	3.69418	0.268841	0
AT4G14980	AT4G14980	0.428562	1.84414	4.12001	2.09151	2.54		1.41557	3.69145	1.66295	2.11143
AT3G43190	SUS4	0.866709	2.86857	4.55257	4.41275	6.4144		2.00186	3.68586	3.54604	5.54769
AT2G32960	AT2G32960	2.38066	3.82834	6.06034	4.03618	4.91621		1.44767	3.67967	1.65552	2.53555
AT4G37990	CAD8	0.0161568	1.5716	3.69357	1.29665	3.73575		1.55545	3.67742	1.28049	3.71959
AT1G09155	PP2B15	0.725714	2.12742	4.39151	2.13182	1.84002		1.4017	3.66579	1.40611	1.11431
AT2G23170	GH3.3	2.63	4.96947	6.29453	4.48452	3.2329		2.33947	3.66453	1.85452	0.602902
AT5G18450	DREB2G	0.0321455	1.30987	3.69508	0.207276	0.00993808		1.27772	3.66293	0.17513	-0.0222074
AT1G04920	SPS3	0.703421	1.85553	4.36423	1.50081	0.971334		1.15211	3.6608	0.797388	0.267913
AT1G11170	AT1G11170	2.405	4.49622	6.06544	4.50251	2.69029		2.09121	3.66044	2.0975	0.28529
AT4G21370	PSEUDOSRKA	0	2.68891	3.65649	2.53905	0.185869		2.68891	3.65649	2.53905	0.185869
AT5G60460	AT5G60460	4.08465	6.04826	7.73787	5.81686	4.97451		1.96362	3.65323	1.73221	0.889868
AT3G50230	AT3G50230	0.667332	1.6781	4.30454	1.42175	1.50015		1.01076	3.63721	0.754419	0.832816
AT3G02040	GDPD1	2.92581	4.2198	6.56021	6.76518	7.62687		1.294	3.6344	3.83937	4.70106
AT5G64530	ANAC104	0.633056	2.44425	4.26646	2.00483	1.80066		1.81119	3.6334	1.37178	1.16761
AT2G41360	AT2G41360	0	1.88764	3.62057	0.704741	0		1.88764	3.62057	0.704741	0
AT2G29090	CYP707A2	0.233347	1.74818	3.84893	1.43488	1.11874		1.51483	3.61558	1.20153	0.885394
AT5G42530	AT5G42530	4.94619	9.41421	8.55511	8.70493	10.1876		4.46802	3.60892	3.75875	5.24141
AT4G12210	AT4G12210	0	0.986827	3.60485	0.903613	0		0.986827	3.60485	0.903613	0
AT2G22180	AT2G22180	0	1.03929	3.58055	1.27348	0.0418621		1.03929	3.58055	1.27348	0.0418621
AT3G60540	AT3G60540	0.906757	2.38868	4.48492	2.18273	2.01548		1.48193	3.57817	1.27597	1.10872
AT4G17670	AT4G17670	1.93212	4.2213	5.5002	4.10749	5.31364		2.28917	3.56807	2.17537	3.38152
AT3G27220	AT3G27220	2.53394	3.75952	6.0924	4.35166	5.03608		1.22559	3.55846	1.81773	2.50214
AT5G59340	WOX2	1.28064	2.67955	4.83474	2.82345	0.661015		1.39892	3.55411	1.54281	-0.619623
AT2G22240	IPS2	2.23078	3.50147	5.74846	3.81817	4.2369		1.27069	3.51768	1.58739	2.00612
AT5G61890	ERF114	0.344173	1.93788	3.85904	0.901	0.46781		1.5937	3.51486	0.556828	0.123637
AT4G02780	GA1	0.195091	1.07777	3.70086	0.983568	0.209059		0.882682	3.50577	0.788477	0.0139689
AT5G39860	PRE1	0.423106	2.52059	3.92247	2.89832	1.69689		2.09749	3.49936	2.47522	1.27378
AT3G27415	AT3G27415	0.0283108	1.25931	3.512	0.689457	0.185217		1.231	3.48369	0.661146	0.156906
AT3G50890	ZHD7	1.01405	2.85855	4.492	2.51128	1.88616		1.8445	3.47794	1.49723	0.872109
AT4G29850	AT4G29850	0.876246	3.9765	4.35031	3.62437	1.70181		3.10025	3.47406	2.74812	0.825569
AT1G26560	BGLU40	1.91188	4.12535	5.37919	4.04544	2.35424		2.21348	3.46732	2.13356	0.442362
AT5G14690	AT5G14690	1.46403	2.99685	4.9239	3.36596	3.22877		1.53283	3.45987	1.90193	1.76474
AT2G38940	PHT1-4	2.24366	3.83452	5.68706	5.35961	6.36991		1.59086	3.44341	3.11595	4.12625
AT3G28890	AtRLP43	0.0571392	2.55726	3.50045	2.02793	0.277988		2.50012	3.44331	1.9708	0.220849
AT5G22460	AT5G22460	0.15364	2.98938	3.5958	1.2707	1.00372		2.83574	3.44216	1.11706	0.850079
AT5G39850	RPS9C	3.92967	6.13938	7.35772	5.94401	4.42111		2.20971	3.42806	2.01434	0.491439
AT5G56510	APUM12	0.0707136	0.736842	3.49391	1.2496	0.0413336		0.666129	3.4232	1.17889	-0.0293799
AT1G21310	EXT3	7.10206	9.05503	10.5242	9.75933	10.1223		1.95297	3.42214	2.65727	3.02022
AT3G02000	GRXC7	0.875982	2.18912	4.2875	1.81234	1.11166		1.31314	3.41152	0.936353	0.235681
AT2G38340	DREB2E	0.204102	1.7409	3.61548	0.968183	1.17236		1.5368	3.41138	0.764081	0.968259
AT3G15830	AT3G15830	0.0949315	1.40607	3.47894	1.40948	0.344607		1.31113	3.38401	1.31454	0.249676
AT1G32900	GBSS1	1.58909	2.94791	4.96593	3.68343	3.20442		1.35882	3.37684	2.09434	1.61533
AT5G20810	AT5G20810	0.425383	1.76407	3.79977	1.49806	1.04541		1.33869	3.37439	1.07267	0.620022
AT2G40030	NRPE1	1.9331	4.07683	5.30418	4.24868	3.1885		2.14373	3.37108	2.31558	1.2554
AT5G26220	AT5G26220	1.06072	2.71509	4.43047	2.91441	6.30553		1.65437	3.36975	1.85369	5.24482
AT4G32870	AT4G32870	3.23319	4.59817	6.60057	5.05125	3.68879		1.36498	3.36738	1.81806	0.455597
AT2G05300	AT2G05300	1.21094	3.23494	4.57574	3.10937	2.0587		2.024	3.36481	1.89843	0.847763
AT1G20860	PHT1-8	0	0.4538	3.36134	0.996805	2.70184		0.4538	3.36134	0.996805	2.70184
AT3G44310	NIT1	7.03457	8.30793	10.3919	8.64852	8.34255		1.27336	3.35736	1.61395	1.30799
AT2G37670	AT2G37670	0.612413	3.6193	3.96848	3.56825	1.21382		3.00689	3.35607	2.95584	0.601403
AT1G64110	AT1G64110	3.15465	5.56061	6.50115	4.71639	2.25802		2.40596	3.3465	1.56174	-0.89663
AT2G32487	AT2G32487	1.29522	3.54664	4.64035	2.9663	5.16678		2.25142	3.34513	1.67109	3.87157
AT4G25250	AT4G25250	0.77277	2.16226	4.09976	3.43715	3.45031		1.38949	3.32699	2.66438	2.67754
AT4G01970	RFS4	0.0827239	1.78151	3.39737	1.43454	0.303342		1.69879	3.31465	1.35182	0.220618
AT3G61340	AT3G61340	0.0841278	3.21758	3.3943	3.15774	0.251371		3.13345	3.31018	3.07362	0.167243
AT5G64550	AT5G64550	0.662035	2.3292	3.96924	2.01608	2.13426		1.66716	3.3072	1.35405	1.47223
AT5G27630	ACBP5	1.24427	3.79118	4.54778	4.43268	1.80702		2.54691	3.30351	3.18841	0.562748
AT3G44830	PDAT2	0.0405006	0.708962	3.33395	0.23696	0.207107		0.668461	3.29345	0.196459	0.166607
AT2G25130	AT2G25130	0.218737	0.9801	3.49388	0.90195	1.27957		0.761363	3.27514	0.683213	1.06083
AT3G44450	AT3G44450	0.921437	2.33913	4.19081	2.70437	2.94076		1.41769	3.26938	1.78293	2.01932
AT5G04500	AT5G04500	0	1.07895	3.26805	0.562858	0.0107082		1.07895	3.26805	0.562858	0.0107082
AT5G09540	AT5G09540	1.41442	4.04014	4.67752	3.83926	2.37914		2.62572	3.2631	2.42483	0.964719
AT2G21640	AT2G21640	2.84128	5.87694	6.09863	4.93744	3.66209		3.03567	3.25735	2.09617	0.820814
AT2G16580	AT2G16580	1.0365	2.32624	4.28338	2.67544	2.27707		1.28974	3.24688	1.63894	1.24057
AT5G41761	AT5G41761	2.14397	5.27731	5.38598	5.78577	4.21007		3.13335	3.24201	3.6418	2.0661
AT5G25180	CYP71B14	0	0.967368	3.24167	0.250536	0.264665		0.967368	3.24167	0.250536	0.264665
AT4G27250	AT4G27250	0.473845	1.73339	3.71495	1.34759	0.984279		1.25954	3.2411	0.87374	0.510434
AT2G04050	DTXL1	1.57551	4.3174	4.80032	4.45685	2.42413		2.74189	3.22481	2.88135	0.848623
AT5G66830	AT5G66830	0.539064	3.37867	3.76086	3.15389	0.519048		2.8396	3.2218	2.61482	-0.0200165
AT5G57380	VIN3	0.0124037	1.43924	3.23078	1.57414	0.0602121		1.42683	3.21837	1.56173	0.0478083
AT3G58270	AT3G58270	1.70975	3.83718	4.91971	3.65904	2.63668		2.12743	3.20996	1.94929	0.926936
AT5G53420	AT5G53420	3.44719	5.0648	6.65404	5.09091	5.61261		1.61761	3.20685	1.64372	2.16542
AT3G45860	CRK4	1.13679	3.60627	4.34015	3.98824	2.87868		2.46948	3.20336	2.85145	1.7419
AT2G26450	PME13	0.143318	2.03848	3.33815	0.602122	1.11452		1.89516	3.19484	0.458804	0.971204
AT4G39210	APL3	2.1103	4.99081	5.29873	4.34119	3.35084		2.88051	3.18843	2.23089	1.24054
AT5G42780	ZHD13	2.17232	3.9227	5.3578	3.35777	2.50165		1.75038	3.18548	1.18545	0.329327
AT4G04610	45383	3.04323	4.49417	6.22323	5.47185	7.31068		1.45095	3.18	2.42862	4.26745
AT4G27480	AT4G27480	1.86637	4.4608	5.04469	4.58865	2.32558		2.59442	3.17831	2.72228	0.459204
AT4G33467	AT4G33467	0.816901	3.68071	3.99121	2.73835	2.97855		2.86381	3.17431	1.92145	2.16165
AT5G66580	AT5G66580	1.95184	3.97063	5.10748	4.22599	3.39247		2.01879	3.15564	2.27415	1.44064
AT5G47060	AT5G47060	3.30934	5.01975	6.45131	4.70422	5.12696		1.71041	3.14197	1.39489	1.81763
AT3G18715	IDL4	0.259248	1.76559	3.38969	1.38006	1.66823		1.50634	3.13045	1.12081	1.40899
AT4G18900	AT4G18900	0.0494895	3.32088	3.1732	4.29636	0		3.27139	3.12371	4.24687	-0.0494895
AT1G67750	AT1G67750	1.76863	4.89631	4.88739	3.31093	3.31044		3.12768	3.11876	1.5423	1.54181
AT3G59140	ABCC10	1.75313	3.03576	4.87058	2.86135	2.76888		1.28263	3.11744	1.10822	1.01575
AT1G19460	AT1G19460	0	0.515884	3.109	0.145986	0		0.515884	3.109	0.145986	0
AT2G36500	CBSCBSPB2	0.850177	2.03072	3.95906	1.76527	1.45775		1.18054	3.10889	0.915096	0.607577
AT4G15910	ATDI21	6.66047	8.39089	9.762	8.5192	7.63602		1.73043	3.10153	1.85874	0.975549
AT2G46450	CNGC12	2.79386	4.06091	5.86595	4.56517	4.42001		1.26705	3.07208	1.7713	1.62614
AT2G34315	AT2G34315	0	0.890399	3.06833	0.256004	0		0.890399	3.06833	0.256004	0
AT2G20825	ULT2	0.0198713	1.3821	3.08226	0.32039	0.0482134		1.36223	3.06239	0.300518	0.0283421
AT1G04770	AT1G04770	2.65378	3.96616	5.71498	4.17636	6.36622		1.31238	3.06121	1.52259	3.71245
AT1G56600	GOLS2	0.79161	3.19715	3.85173	2.49809	3.24173		2.40554	3.06012	1.70648	2.45012
AT1G21360	GLTP2	2.19864	4.76086	5.2421	4.49917	2.78868		2.56222	3.04346	2.30052	0.590036
AT5G51760	AHG1	0	0.788694	3.04109	0.263244	1.05334		0.788694	3.04109	0.263244	1.05334
AT3G47400	PME33	1.11567	2.30728	4.15104	2.14489	2.23404		1.19161	3.03537	1.02923	1.11837
AT4G32810	CCD8	0.474596	2.76868	3.50421	3.36566	1.29141		2.29409	3.02961	2.89107	0.816809
AT1G54530	AT1G54530	1.54197	3.92345	4.52637	3.96628	3.05418		2.38148	2.9844	2.42431	1.5122
AT4G29240	AT4G29240	1.66483	3.3103	4.64851	2.77047	2.30935		1.64547	2.98369	1.10564	0.644521
AT2G39700	EXPA4	4.57476	6.68159	7.54836	6.44114	5.93211		2.10683	2.97359	1.86638	1.35735
AT2G01610	AT2G01610	2.12838	4.24487	5.09907	3.73761	2.56313		2.11649	2.97069	1.60922	0.434742
AT5G55650	AT5G55650	0.297149	1.1464	3.24054	1.64674	1.30564		0.849255	2.94339	1.34959	1.00849
AT3G18250	AT3G18250	1.10533	3.94314	4.04627	3.34175	3.6309		2.83781	2.94094	2.23641	2.52556
AT2G25940	ALPHA-VPE	1.1124	2.09936	4.04415	2.08907	2.91643		0.986955	2.93174	0.976671	1.80402
AT2G28790	AT2G28790	3.85891	5.70105	6.77731	5.42771	4.79256		1.84214	2.91841	1.5688	0.933656
AT4G32290	AT4G32290	2.22662	3.74116	5.13757	3.60809	4.03625		1.51454	2.91095	1.38147	1.80963
AT5G05250	AT5G05250	2.04741	6.7245	4.95242	5.13325	3.23704		4.67708	2.905	3.08584	1.18963
AT3G21240	4CL2	3.08	4.30926	5.96836	4.70621	4.70682		1.22926	2.88836	1.62621	1.62682
AT2G27990	BLH8	1.02953	2.08163	3.91608	2.0142	1.25658		1.0521	2.88655	0.98467	0.227056
AT3G27400	AT3G27400	2.16579	4.21535	5.04525	3.68603	2.44694		2.04956	2.87946	1.52024	0.281151
AT4G35070	AT4G35070	2.23321	3.42212	5.09483	3.40617	3.08496		1.18891	2.86162	1.17296	0.851749
AT1G20070	AT1G20070	2.44927	4.78835	5.30211	4.66809	3.00366		2.33908	2.85283	2.21882	0.554387
AT5G48950	DHNAT2	1.39774	2.61052	4.24372	3.13871	2.15505		1.21279	2.84599	1.74098	0.757313
AT1G29050	TBL38	3.39097	4.91424	6.22094	4.94941	5.10312		1.52327	2.82997	1.55844	1.71215
AT5G11930	GRXC10	0.30785	1.53955	3.13092	1.26301	1.40582		1.2317	2.82307	0.955165	1.09797
AT2G41850	ADPG2	0.0769079	0.389971	2.89714	0.767045	1.11256		0.313063	2.82023	0.690137	1.03565
AT2G24762	GDU4	2.21198	4.41487	5.03193	3.81708	5.1954		2.20289	2.81994	1.6051	2.98341
AT5G23810	AAP7	1.47944	3.97182	4.29869	3.63068	2.82411		2.49237	2.81925	2.15124	1.34466
AT1G16490	ATMYB58	0.959381	1.99984	3.7785	1.90671	2.08408		1.04046	2.81911	0.947332	1.1247
AT5G44260	AT5G44260	1.87586	3.46091	4.67295	3.8288	3.70435		1.58505	2.79709	1.95293	1.82848
AT1G55265	AT1G55265	2.76691	4.83426	5.55954	4.66262	3.99394		2.06735	2.79263	1.89571	1.22703
AT4G35640	SAT4	0.674832	1.70127	3.45479	1.57999	2.52326		1.02644	2.77996	0.905154	1.84843
AT4G08910	AT4G08910	0.840081	2.7505	3.61725	2.76166	1.48075		1.91042	2.77717	1.92158	0.640668
AT5G65640	BHLH93	3.79751	5.73936	6.56474	6.06827	6.02522		1.94185	2.76724	2.27076	2.22771
AT1G24095	AT1G24095	1.73102	3.30456	4.49267	3.35215	2.40565		1.57354	2.76165	1.62113	0.674633
AT3G04380	SUVR4	1.87148	3.42227	4.6261	3.2546	2.36853		1.55079	2.75462	1.38312	0.497046
AT1G01250	ERF023	0.772173	1.77705	3.52637	1.59671	0.889952		1.00488	2.7542	0.824532	0.117779
AT5G50335	AT5G50335	1.27672	3.58832	4.0306	2.44725	2.39382		2.3116	2.75387	1.17053	1.1171
AT1G10530	AT1G10530	1.22938	2.46876	3.98293	2.28936	2.63883		1.23938	2.75355	1.05998	1.40946
AT5G39520	AT5G39520	0.493629	2.93874	3.23864	2.80483	3.32598		2.44511	2.74501	2.3112	2.83236
AT5G01660	AT5G01660	0.928501	1.92508	3.67293	2.10569	1.13096		0.996584	2.74443	1.17719	0.202464
AT5G09970	CYP78A7	0.592696	2.49154	3.33684	2.1	0.901417		1.89884	2.74414	1.50731	0.308721
AT1G54160	NFYA5	1.70525	3.84943	4.44851	3.502	3.27403		2.14418	2.74326	1.79675	1.56878
AT1G15840	AT1G15840	0.546034	1.37813	3.28223	1.50793	1.14516		0.832097	2.73619	0.961893	0.599127
AT3G28857	PRE5	0.107719	1.81366	2.8438	0.679067	0.386393		1.70595	2.73608	0.571348	0.278674
AT2G38920	RF178	0	1.11032	2.73327	0.240441	0.528411		1.11032	2.73327	0.240441	0.528411
AT3G52770	ZPR3	2.32869	3.74564	5.06115	4.02269	3.28956		1.41695	2.73246	1.69399	0.960869
AT3G17130	AT3G17130	0.0675859	0.989726	2.79641	0.514533	0.711883		0.92214	2.72882	0.446947	0.644297
AT1G62180	45384	3.77725	5.41636	6.48377	5.332	6.58521		1.63911	2.70652	1.55475	2.80796
AT4G33040	GRXC6	1.74571	3.94492	4.45129	3.52377	3.40202		2.19922	2.70558	1.77806	1.65632
AT1G54010	GLL23	5.34505	6.71417	8.04826	7.34393	5.75213		1.36912	2.70321	1.99888	0.40708
AT5G39240	AT5G39240	2.80577	4.21277	5.50566	4.43072	4.06653		1.407	2.69989	1.62496	1.26076
AT5G02580	AT5G02580	1.76898	3.16815	4.46273	3.20009	3.27558		1.39918	2.69375	1.43111	1.50661
AT5G18690	AGP25	2.21905	4.18269	4.9122	3.80899	4.46632		1.96364	2.69315	1.58995	2.24727
AT3G18750	WNK6	2.39312	4.03826	5.08585	4.37533	2.6516		1.64514	2.69273	1.98221	0.258479
AT2G40100	LHCB4.3	4.38784	6.37074	7.07764	5.7477	4.20899		1.9829	2.68979	1.35986	-0.178849
AT1G19840	AT1G19840	1.68979	3.55942	4.37661	3.0209	2.93987		1.86963	2.68681	1.3311	1.25008
AT1G23140	AT1G23140	2.47288	4.00817	5.1572	5.23428	5.85451		1.53529	2.68431	2.7614	3.38163
AT2G27240	ALMT7	0.0206385	0.283328	2.68836	0.202617	0.295261		0.26269	2.66772	0.181978	0.274623
AT5G03150	JKD	2.09115	4.17919	4.7476	3.51759	3.60802		2.08804	2.65645	1.42644	1.51687
AT4G29150	IQD25	0.54069	2.03717	3.19589	1.5429	0.614603		1.49648	2.6552	1.00221	0.0739128
AT5G21280	AT5G21280	1.63308	2.72653	4.28108	3.132	2.46138		1.09346	2.64801	1.49893	0.828303
AT5G22930	AT5G22930	1.58256	3.74666	4.22883	3.38146	3.21253		2.1641	2.64627	1.7989	1.62997
AT5G65070	MAF4	1.46406	3.42042	4.10936	3.7507	1.13957		1.95636	2.6453	2.28664	-0.324488
AT1G09310	AT1G09310	7.28449	9.14305	9.92897	9.47879	8.23225		1.85856	2.64447	2.1943	0.947761
AT4G08868	AT4G08868	0.164154	1.96065	2.8034	0.918846	0.299916		1.7965	2.63925	0.754693	0.135762
AT4G36220	CYP84A1	3.90468	5.27834	6.54307	5.31787	6.06598		1.37366	2.63839	1.41319	2.1613
AT3G61900	AT3G61900	0.889514	2.17482	3.5135	1.72756	2.40581		1.28531	2.62399	0.83805	1.51629
AT2G18193	AT2G18193	2.65809	5.07413	5.27414	5.22644	3.50711		2.41604	2.61605	2.56836	0.849025
AT3G58930	AT3G58930	2.31782	3.89089	4.91997	3.98812	3.08795		1.57307	2.60215	1.6703	0.770126
AT1G59660	NUP98B	2.01233	3.82556	4.61123	3.50844	2.71861		1.81323	2.5989	1.49611	0.706282
AT3G11210	CPRD49	2.88844	5.65571	5.48501	5.86231	3.62567		2.76727	2.59657	2.97388	0.73723
AT3G13960	GRF5	2.93904	4.34399	5.53458	4.6104	3.39718		1.40495	2.59554	1.67136	0.458145
AT5G44210	ERF9	1.1558	2.42888	3.74413	2.33205	1.77382		1.27308	2.58833	1.17625	0.618027
AT5G27060	AtRLP53	0.0915685	0.844598	2.67479	0.56124	0.133279		0.75303	2.58322	0.469672	0.04171
AT2G31180	ATMYB14	0.359984	1.72007	2.92767	2.23802	2.00032		1.36009	2.56769	1.87804	1.64034
AT5G64120	PER71	5.26355	6.95218	7.82039	6.61626	5.25643		1.68863	2.55684	1.35271	-0.00711487
AT5G58390	PER67	3.17059	5.8312	5.71952	4.72933	4.87124		2.66061	2.54893	1.55875	1.70065
AT1G28390	AT1G28390	2.58862	4.32383	5.12456	4.18548	3.45666		1.73521	2.53594	1.59686	0.868037
AT3G53370	S1FA1	4.73802	6.74662	7.26879	6.33743	4.23878		2.0086	2.53078	1.59941	-0.499242
AT5G20635	GG3	1.74647	2.90592	4.27291	3.06882	3.03848		1.15945	2.52644	1.32235	1.29201
AT4G34860	INVB	3.01125	4.84757	5.5357	4.80688	3.67782		1.83632	2.52444	1.79563	0.66657
AT4G01985	AT4G01985	0.124655	3.85578	2.64677	2.80882	0.465528		3.73113	2.52211	2.68416	0.340873
AT2G41290	SSL2	1.53401	2.58738	4.05132	2.59321	2.1256		1.05337	2.51731	1.0592	0.591587
AT1G21290	AT1G21290	0	1.82326	2.51484	1.89176	0		1.82326	2.51484	1.89176	0
AT4G32460	AT4G32460	3.70426	5.90972	6.21847	5.36811	4.53106		2.20545	2.51421	1.66385	0.826793
AT3G17820	GLN1-3	5.31104	7.04366	7.82422	7.04326	6.15758		1.73261	2.51318	1.73221	0.846538
AT1G55210	DIR20	4.40777	5.71479	6.91599	6.14348	5.79796		1.30702	2.50822	1.7357	1.39019
AT4G37390	YDK1	1.79949	4.17882	4.30329	3.70795	2.67118		2.37933	2.5038	1.90846	0.871685
AT1G48100	AT1G48100	0.527482	1.81923	3.02819	1.51279	1.05332		1.29175	2.50071	0.985303	0.525837
AT5G53700	AT5G53700	0.425795	2.19213	2.92018	2.24163	1.00593		1.76633	2.49438	1.81584	0.580131
AT2G43000	JUB1	0.87015	2.56164	3.36235	1.9091	2.84769		1.69149	2.4922	1.03895	1.97754
AT4G25420	GA20OX1	0.183947	1.3268	2.67469	0.849727	1.41849		1.14286	2.49074	0.66578	1.23454
AT4G27810	AT4G27810	0.367441	1.2983	2.85125	0.974831	0.899291		0.930859	2.48381	0.60739	0.53185
AT3G42670	CLSY1	2.3268	4.26615	4.80725	4.43198	3.09782		1.93935	2.48045	2.10518	0.771025
AT3G56220	AT3G56220	1.57701	2.56083	4.05631	2.84849	2.57843		0.983817	2.4793	1.27148	1.00142
AT5G22300	NIT4	4.13654	5.79897	6.61424	5.66037	3.28482		1.66243	2.4777	1.52383	-0.851716
AT1G23040	AT1G23040	2.99515	4.99396	5.4722	4.94992	4.51396		1.99881	2.47705	1.95477	1.51881
AT1G23970	AT1G23970	2.79505	4.91159	5.27199	5.13373	3.85436		2.11655	2.47695	2.33868	1.05932
AT2G44910	ATHB-4	0.729534	2.2676	3.20323	2.23683	1.68167		1.53807	2.4737	1.5073	0.952137
AT2G30580	DRIP2	3.38199	5.04259	5.84191	5.21511	3.60936		1.6606	2.45991	1.83312	0.227362
AT1G06980	AT1G06980	1.27013	2.39327	3.72616	2.99715	2.79289		1.12314	2.45603	1.72702	1.52275
AT1G60630	AT1G60630	2.10642	3.47658	4.56028	3.26159	3.16303		1.37016	2.45386	1.15517	1.05661
AT2G26870	NPC2	2.37251	4.63779	4.82268	4.48408	2.70591		2.26528	2.45017	2.11157	0.333404
AT1G75580	AT1G75580	1.86648	2.97106	4.31651	3.0439	3.05295		1.10458	2.45003	1.17743	1.18647
AT2G39370	MAKR4	0.27447	2.44276	2.71704	1.45232	2.25787		2.16829	2.44257	1.17785	1.9834
AT1G70440	SRO3	0.321819	2.03228	2.76145	2.09822	1.74713		1.71046	2.43963	1.7764	1.42531
AT5G51810	GA20OX2	0.45005	1.71434	2.8881	2.0945	1.88286		1.26429	2.43805	1.64445	1.43281
AT3G52780	PAP20	0.0625758	0.891745	2.48509	0.652582	0.666714		0.829169	2.42251	0.590006	0.604138
AT1G79110	BRG2	2.54629	5.48725	4.96863	5.11927	5.40052		2.94096	2.42234	2.57298	2.85423
AT5G54300	AT5G54300	2.52829	4.09709	4.94708	3.82269	3.37344		1.5688	2.41879	1.2944	0.845143
AT2G42720	AT2G42720	0.748577	2.0041	3.15781	2.01214	0.755615		1.25552	2.40923	1.26357	0.00703799
AT1G29195	AT1G29195	0.81799	2.6144	3.21855	2.29818	2.42329		1.79641	2.40056	1.48019	1.6053
AT5G15830	AtbZIP3	1.28904	3.30245	3.68563	3.52649	3.95487		2.01341	2.39659	2.23745	2.66582
AT3G53690	AT3G53690	0.707436	2.3374	3.10345	2.20637	1.15433		1.62997	2.39602	1.49894	0.446895
AT2G28610	WOX3	0.141635	0.750661	2.53322	0.437669	0.130383		0.609027	2.39159	0.296034	-0.0112515
AT4G18360	GLO5	2.78335	3.93865	5.17479	4.14725	4.17301		1.1553	2.39144	1.3639	1.38965
AT5G03760	CSLA9	2.48868	4.41059	4.87913	4.57912	4.55375		1.92191	2.39045	2.09044	2.06508
AT5G57785	AT5G57785	4.32045	6.62763	6.70866	6.39894	5.19172		2.30718	2.38821	2.07849	0.871273
AT4G38620	MYB4	2.65778	4.56258	5.04444	4.67525	4.97217		1.90481	2.38666	2.01747	2.31439
AT2G40470	LBD15	0.828798	1.80484	3.20682	1.92616	1.74241		0.976044	2.37802	1.09736	0.913612
AT3G59900	ARGOS	0.614707	1.50186	2.98403	1.5132	2.62758		0.887149	2.36932	0.898494	2.01287
AT2G31730	AT2G31730	2.75284	4.35714	5.11823	4.21985	3.78666		1.60431	2.36539	1.46701	1.03382
AT3G05980	AT3G05980	1.40104	2.8481	3.76301	2.96691	2.77938		1.44706	2.36197	1.56587	1.37833
AT4G21960	PER42	8.52769	10.2607	10.8878	10.3795	10.724		1.73304	2.36009	1.85179	2.19628
AT1G72830	NFYA3	2.83842	4.89473	5.19415	4.222	4.95107		2.05631	2.35573	1.38358	2.11265
AT5G47370	HAT2	3.26899	6.32772	5.624	6.23771	5.75563		3.05873	2.35501	2.96872	2.48664
AT4G04745	AT4G04745	2.73173	4.67193	5.08234	4.7188	4.23174		1.94021	2.35062	1.98708	1.50001
AT1G23700	AT1G23700	0.128992	1.13263	2.47504	1.42772	0.0378353		1.00364	2.34605	1.29873	-0.0911571
AT3G48510	AT3G48510	0.34886	1.19009	2.69103	0.795844	1.23632		0.841235	2.34217	0.446984	0.887457
AT3G61820	AT3G61820	3.55035	5.52587	5.89165	5.04768	5.1419		1.97552	2.3413	1.49733	1.59155
AT4G24080	ALL1	0.738821	1.57813	3.07831	1.56833	1.43054		0.839313	2.33949	0.829513	0.691722
AT4G16540	AT4G16540	0.517007	2.99431	2.85642	3.81293	4.03531		2.4773	2.33941	3.29593	3.51831
AT4G21500	AT4G21500	1.27216	2.86208	3.60324	2.5934	1.83896		1.58992	2.33108	1.32124	0.566802
AT2G21220	AT2G21220	0.691364	2.30034	3.02236	2.47209	2.13137		1.60898	2.33099	1.78073	1.44001
AT3G60647	AT3G60647	1.11181	2.52832	3.43905	2.16142	1.10882		1.41651	2.32724	1.04961	-0.00298728
AT4G22960	AT4G22960	0.268833	2.22229	2.58229	2.20553	0.650593		1.95345	2.31345	1.9367	0.38176
AT4G12735	AT4G12735	1.70037	3.20659	4.01327	3.24828	2.0499		1.50622	2.3129	1.54791	0.349527
AT2G40200	BHLH51	0.399625	1.59957	2.70949	1.61027	1.73589		1.19995	2.30986	1.21064	1.33626
AT2G45210	SAUR36	2.20615	3.78384	4.51552	4.20981	4.31079		1.57769	2.30937	2.00367	2.10464
AT4G37800	XTH7	3.91398	6.42068	6.2182	6.99589	6.16924		2.50671	2.30422	3.08192	2.25526
AT1G15300	AT1G15300	1.40698	2.81921	3.7111	2.77078	1.21695		1.41224	2.30413	1.36381	-0.190021
AT5G27220	AT5G27220	0.151186	1.74238	2.44658	0.852389	1.01339		1.59119	2.2954	0.701202	0.862201
AT1G71380	CEL3	0.411793	2.1674	2.68598	2.00252	1.02043		1.7556	2.27419	1.59072	0.608639
AT4G03965	AT4G03965	0.567214	1.61053	2.8406	1.44186	0.976572		1.04332	2.27338	0.874644	0.409358
AT1G36180	ACC2	1.71365	3.47075	3.98581	2.78773	2.13251		1.7571	2.27216	1.07408	0.418858
AT1G09812	AT1G09812	1.08501	2.90436	3.35533	2.82694	2.40636		1.81934	2.27032	1.74193	1.32134
AT1G74000	SSL11	1.01318	3.88268	3.27287	3.41506	1.68079		2.8695	2.2597	2.40188	0.667614
AT1G13430	STO9	0.566274	1.97099	2.82511	1.92768	0.403551		1.40471	2.25884	1.3614	-0.162723
AT5G06250	AT5G06250	0.240541	0.973379	2.48669	0.639752	1.57913		0.732838	2.24614	0.399211	1.33859
AT5G03670	AT5G03670	1.65323	2.83181	3.89716	2.75398	2.57655		1.17859	2.24393	1.10075	0.923318
AT4G03270	CYCD6-1	1.25344	2.57616	3.49473	2.56807	1.82579		1.32271	2.24129	1.31462	0.57235
AT5G45730	AT5G45730	0.593402	1.54925	2.82954	1.55138	1.7228		0.955846	2.23614	0.957982	1.1294
AT4G32890	GATA9	2.22044	3.49193	4.45568	3.83311	3.56452		1.27149	2.23523	1.61267	1.34408
AT5G53660	GRF7	0.142832	1.46025	2.37792	0.724474	1.48427		1.31742	2.23509	0.581642	1.34144
AT1G02040	AT1G02040	0.0353743	0.319537	2.261	0.321009	0.105405		0.284163	2.22562	0.285634	0.0700311
AT1G19250	FMO1	0.731801	1.43529	2.9563	2.22196	2.05204		0.703493	2.2245	1.49016	1.32024
AT4G32280	IAA29	0.282037	2.52586	2.50302	2.73564	3.43554		2.24382	2.22098	2.4536	3.15351
AT5G49330	MYB111	0.554373	2.1238	2.7691	2.09317	2.16961		1.56943	2.21472	1.5388	1.61524
AT4G31330	AT4G31330	1.02129	3.07744	3.2323	2.48646	5.78749		2.05615	2.21101	1.46517	4.7662
AT3G12500	CHI-B	3.15786	4.63494	5.36671	4.9126	7.46914		1.47708	2.20884	1.75473	4.31127
AT4G13990	AT4G13990	1.55894	3.08636	3.76506	3.18282	2.50871		1.52742	2.20612	1.62388	0.949767
AT1G35720	ANN1	6.97524	8.4354	9.18064	8.73691	9.06843		1.46016	2.20541	1.76167	2.09319
AT2G36307	ZPR4	2.09831	3.67022	4.30353	3.78424	3.31093		1.57191	2.20523	1.68593	1.21263
AT5G63650	SRK2H	2.55528	3.96942	4.75865	4.1557	4.05777		1.41413	2.20336	1.60042	1.50248
AT2G15318	AT2G15318	0.0893467	2.37445	2.28445	2.06087	0.26699		2.2851	2.1951	1.97153	0.177644
AT2G36970	UGT86A1	2.10725	3.50935	4.29956	4.57485	4.88296		1.4021	2.19231	2.46759	2.77571
AT5G52900	MAKR6	1.90786	4.85384	4.09942	4.77881	3.65481		2.94598	2.19156	2.87095	1.74694
AT1G31320	LBD4	1.39712	3.84427	3.58484	3.33684	3.3611		2.44716	2.18772	1.93972	1.96398
AT3G14370	WAG2	0.634749	1.90566	2.81833	1.70441	2.36324		1.27091	2.18358	1.06966	1.72849
AT2G31160	LSH3	1.3502	3.49743	3.53067	2.79695	2.94924		2.14723	2.18047	1.44675	1.59904
AT1G46264	HSFB4	3.03248	4.37225	5.20991	4.34437	4.0676		1.33977	2.17743	1.31189	1.03512
AT1G27020	AT1G27020	6.00832	8.01173	8.18228	7.82328	7.90077		2.00342	2.17396	1.81496	1.89245
AT4G22110	AT4G22110	0.423797	1.62637	2.59364	2.01413	1.53706		1.20258	2.16984	1.59034	1.11326
AT3G30460	AT3G30460	0.664702	1.97807	2.83415	1.82267	0.764029		1.31337	2.16945	1.15797	0.0993271
AT3G14020	NFYA6	2.70559	4.65179	4.87377	4.09276	4.42429		1.9462	2.16819	1.38718	1.71871
AT1G11740	AT1G11740	0.47728	1.05023	2.64525	1.16092	1.34656		0.572948	2.16797	0.683641	0.86928
AT1G52000	JAL5	2.8463	4.2019	5.00703	4.08879	2.91484		1.3556	2.16073	1.24249	0.0685406
AT5G11870	AT5G11870	0.951298	1.83804	3.10856	1.90148	1.69607		0.886743	2.15726	0.950187	0.744776
AT1G36060	WIND3	3.27936	4.59285	5.43621	5.15261	4.83068		1.31349	2.15684	1.87325	1.55132
AT3G16175	AT3G16175	0.653103	2.64382	2.80527	2.99671	0.722774		1.99071	2.15216	2.34361	0.0696703
AT1G60060	AT1G60060	1.40461	3.01618	3.55135	3.51481	3.50275		1.61157	2.14674	2.11019	2.09814
AT2G47680	AT2G47680	2.01733	3.47681	4.16404	3.62913	2.91578		1.45948	2.14671	1.6118	0.898455
AT4G18620	PYL13	0	0.554045	2.14545	0.589702	0.0429763		0.554045	2.14545	0.589702	0.0429763
AT1G68795	CLE12	1.17241	2.46701	3.31344	2.26842	2.79808		1.29461	2.14103	1.09602	1.62567
AT2G33020	AtRLP24	0.117219	0.507284	2.25608	0.393779	0.0974805		0.390065	2.13886	0.27656	-0.0197385
AT3G03780	MS2	3.89014	6.03693	6.02435	6.36077	5.35057		2.1468	2.13421	2.47064	1.46043
AT3G30180	CYP85A2	2.01901	3.55088	4.15146	4.28094	4.78214		1.53187	2.13245	2.26193	2.76313
AT5G62280	AT5G62280	1.65806	4.62749	3.7864	5.17128	4.66746		2.96943	2.12834	3.51322	3.0094
AT2G45450	ZPR1	2.66467	4.4146	4.79258	4.24152	3.7364		1.74994	2.12791	1.57685	1.07174
AT1G22650	INVD	2.29941	3.58764	4.42593	3.97412	3.26993		1.28823	2.12652	1.6747	0.970517
AT3G05690	NFYA2	2.11001	4.92494	4.23245	3.8933	5.31073		2.81494	2.12244	1.78329	3.20072
AT1G15960	NRAMP6	2.21506	4.07565	4.33569	4.35901	2.54904		1.86059	2.12063	2.14395	0.333979
AT3G18090	NRPD2B	2.00343	3.1853	4.1224	3.3317	2.34002		1.18187	2.11897	1.32827	0.336592
AT4G25100	FSD1	4.81823	7.76128	6.93511	6.50867	6.4297		2.94305	2.11688	1.69044	1.61147
AT1G68460	IPT1	0.156154	0.445334	2.27293	0.582492	0.63333		0.28918	2.11677	0.426339	0.477176
AT3G54450	NPF5.4	0	0.509917	2.10552	0.168964	1.32408		0.509917	2.10552	0.168964	1.32408
AT1G78480	AT1G78480	1.71723	2.75036	3.8223	3.13445	2.70203		1.03313	2.10506	1.41721	0.984795
AT1G63340	AT1G63340	0.03228	0.722137	2.13689	0.473545	0.413351		0.689857	2.10461	0.441265	0.381071
AT3G26480	AT3G26480	0.310689	0.796926	2.41423	0.927468	1.14036		0.486236	2.10354	0.616779	0.829672
AT1G26590	AT1G26590	0.199866	1.73655	2.30148	1.66107	0.568067		1.53668	2.10161	1.4612	0.368201
AT2G42990	AT2G42990	0.0487668	0.992206	2.14976	0.21728	0.185078		0.943439	2.10099	0.168514	0.136311
AT4G30180	AT4G30180	0.543851	3.09086	2.63828	1.56759	1.65617		2.547	2.09443	1.02374	1.11232
AT5G60220	TET4	0.431538	1.26215	2.52092	0.975945	0.374427		0.830617	2.08938	0.544408	-0.0571107
AT3G25905	CLE27	0.38505	3.13824	2.47232	2.56306	1.70492		2.75319	2.08727	2.17801	1.31987
AT4G37890	EDA40	1.23988	2.87548	3.32677	2.5405	2.26525		1.6356	2.08689	1.30062	1.02537
AT3G10880	AT3G10880	0.456606	1.60412	2.54109	1.57628	1.03068		1.14751	2.08448	1.11967	0.574072
AT2G34185	AT2G34185	0.787667	1.904	2.86514	2.51469	0.934957		1.11633	2.07747	1.72702	0.14729
AT1G14210	AT1G14210	5.17525	6.54118	7.25165	6.79524	6.14362		1.36593	2.0764	1.61999	0.968373
AT4G39510	CYP96A12	1.12934	3.69102	3.20519	2.54619	1.68704		2.56167	2.07584	1.41685	0.5577
AT5G24105	AGP41	1.63227	3.6651	3.70091	3.95002	2.7991		2.03283	2.06864	2.31775	1.16683
AT5G15490	UGD3	4.84468	6.46245	6.91215	6.35431	5.86495		1.61778	2.06748	1.50963	1.02028
AT3G14950	TTL2	0.0660308	0.616237	2.12443	0.577706	0.148043		0.550206	2.0584	0.511675	0.0820121
AT2G26310	FAP2	1.09097	2.30897	3.14703	2.93008	2.97125		1.218	2.05606	1.83911	1.88029
AT2G23010	SCPL9	1.36629	2.9887	3.41911	2.61406	2.245		1.62241	2.05282	1.24777	0.878711
AT3G29370	AT3G29370	1.11163	2.9666	3.15792	2.68369	1.8805		1.85498	2.04629	1.57206	0.768874
AT5G34871	AT5G34871	0	2.85032	2.04319	2.70116	0.0357942		2.85032	2.04319	2.70116	0.0357942
AT3G23290	LSH4	1.96342	4.04957	3.99901	3.64982	3.34505		2.08615	2.03558	1.6864	1.38163
AT4G03320	TIC20-IV	2.31598	3.5672	4.34986	3.84935	3.65782		1.25122	2.03388	1.53338	1.34184
AT1G70510	KNAT2	0.945801	2.20631	2.97701	1.87329	1.82715		1.26051	2.03121	0.927491	0.881352
AT3G16330	AT3G16330	2.11231	3.56056	4.13988	3.57299	3.36349		1.44826	2.02757	1.46069	1.25118
AT1G78450	AT1G78450	3.00509	6.42113	5.03143	6.09907	4.17743		3.41604	2.02634	3.09398	1.17234
AT4G36110	AT4G36110	0.239433	2.78049	2.26385	2.39574	1.49457		2.54106	2.02442	2.1563	1.25514
AT3G16490	IQD26	0.965895	1.87087	2.98075	1.97381	2.0781		0.904977	2.01485	1.00791	1.11221
AT4G31620	REM3	1.00336	1.95664	3.0168	2.32675	2.10851		0.953284	2.01344	1.32339	1.10516
AT1G07090	LSH6	3.10662	5.20579	5.11221	4.96305	5.03759		2.09918	2.0056	1.85643	1.93098
AT1G25425	CLE43	1.97961	3.44273	3.98201	3.42209	2.6382		1.46312	2.0024	1.44248	0.658588
AT1G60890	PIP5K8	3.09903	4.67556	5.09948	4.55582	3.65928		1.57653	2.00044	1.45679	0.560248
AT5G09470	PUMP6	0	0.227854	1.98875	1.40991	2.05302		0.227854	1.98875	1.40991	2.05302
AT5G66630	DAR5	1.7221	3.16995	3.71065	3.75993	2.22126		1.44785	1.98855	2.03783	0.499157
AT2G25470	AtRLP21	0.0496744	0.438918	2.03682	0.294465	0.146179		0.389244	1.98715	0.24479	0.0965046
AT2G31390	AT2G31390	5.32044	6.67214	7.30341	7.24712	7.30586		1.3517	1.98296	1.92667	1.98542
AT1G46480	WOX4	1.5479	3.44401	3.52141	3.16584	2.73031		1.89611	1.97351	1.61795	1.18241
AT5G49800	AT5G49800	1.63185	2.81253	3.6048	3.18543	2.79716		1.18068	1.97295	1.55359	1.16531
AT2G21780	AT2G21780	0.66161	2.04238	2.63232	2.02118	0.936308		1.38077	1.97071	1.35957	0.274698
AT1G61930	AT1G61930	0.969413	2.05678	2.93946	2.07054	2.43779		1.08737	1.97004	1.10113	1.46838
AT4G14819	AT4G14819	0.0222258	1.78629	1.99047	0.983797	0.49282		1.76406	1.96824	0.961571	0.470594
AT3G12510	AT3G12510	2.20891	3.59805	4.1764	3.68106	2.98239		1.38914	1.96749	1.47215	0.77348
AT3G22968	CPuORF59	2.73451	5.2623	4.68632	5.26111	5.42551		2.52779	1.95181	2.5266	2.69101
AT5G46690	BHLH71	2.7327	4.57969	4.67509	4.12696	4.23249		1.847	1.9424	1.39427	1.49979
AT3G16990	TENA_E	3.01604	4.39367	4.95387	4.46409	4.09162		1.37764	1.93783	1.44806	1.07558
AT2G23180	CYP96A1	0.99158	2.50031	2.92546	2.40726	1.86556		1.50873	1.93388	1.41568	0.873977
AT4G01265	AT4G01265	0.0342693	0.727548	1.96333	0.554689	0.251122		0.693279	1.92906	0.52042	0.216853
AT3G59220	PRN1	2.36442	4.81135	4.29287	5.44299	4.44994		2.44693	1.92844	3.07857	2.08552
AT1G33960	AIG1	1.04599	2.59945	2.96312	1.96497	1.88014		1.55345	1.91713	0.918982	0.834146
AT5G26230	MAKR1	1.30878	3.61898	3.225	3.3579	3.17075		2.3102	1.91622	2.04912	1.86197
AT1G11700	AT1G11700	2.30536	4.63725	4.21663	4.10239	4.24126		2.33189	1.91127	1.79703	1.9359
AT5G18320	PUB46	0.133603	1.2992	2.03996	1.14263	0.203322		1.16559	1.90636	1.00903	0.0697197
AT3G25760	AOC1	4.71417	6.88891	6.61939	6.42482	6.21753		2.17474	1.90522	1.71066	1.50336
AT5G02890	AT5G02890	2.49961	4.44243	4.39676	4.51162	3.33274		1.94282	1.89715	2.01201	0.83313
AT4G14620	AT4G14620	0.848575	3.02477	2.74511	2.61447	3.01426		2.1762	1.89654	1.7659	2.16569
AT1G05420	OFP12	0.689932	2.49845	2.57986	2.25323	1.33877		1.80852	1.88993	1.5633	0.648842
AT1G22990	HIPP22	1.88898	3.66034	3.77531	3.08474	3.71594		1.77136	1.88633	1.19576	1.82695
AT5G13250	AT5G13250	0.791667	2.23343	2.67686	2.40968	1.24673		1.44176	1.88519	1.61801	0.455066
AT2G37640	EXPA3	3.66782	6.07421	5.54888	5.14493	4.57374		2.40639	1.88106	1.47711	0.905922
AT3G48850	MPT2	0.225396	1.19597	2.10567	1.5385	2.31778		0.970573	1.88028	1.3131	2.09238
AT4G28250	EXPB3	3.1982	4.63543	5.07717	5.29531	5.33989		1.43723	1.87897	2.09711	2.14169
AT2G38860	DJ1E	3.76815	5.33967	5.64316	5.67195	5.44312		1.57152	1.87501	1.9038	1.67497
AT5G15500	AT5G15500	0.559553	3.84841	2.42479	1.19102	2.05485		3.28885	1.86523	0.631469	1.4953
AT1G54385	AT1G54385	2.01945	3.10924	3.88377	3.14967	2.88527		1.08979	1.86432	1.13022	0.865825
AT3G55110	ABCG18	1.04856	2.71885	2.91273	2.64026	1.64463		1.67028	1.86416	1.5917	0.596061
AT4G02110	AT4G02110	1.24762	2.30747	3.10733	2.2031	1.75558		1.05985	1.85971	0.955478	0.507955
AT3G45210	AT3G45210	2.2916	3.79212	4.14614	4.29785	4.80353		1.50053	1.85454	2.00625	2.51193
AT5G03230	AT5G03230	3.04061	6.05445	4.88798	5.11186	4.99038		3.01384	1.84737	2.07125	1.94976
AT5G28300	AT5G28300	3.56842	5.50799	5.40799	5.40059	5.10021		1.93957	1.83958	1.83217	1.53179
AT4G36270	AT4G36270	1.42809	2.62439	3.26758	2.88114	1.88328		1.1963	1.83949	1.45305	0.455191
AT5G01820	CIPK14	2.63395	3.84172	4.47038	4.28272	5.02062		1.20776	1.83642	1.64876	2.38667
AT3G48920	AtMYB45	0.927113	3.40175	2.76291	2.17882	2.97094		2.47464	1.8358	1.2517	2.04383
AT1G03710	AT1G03710	0.0559106	0.923011	1.89168	0.243318	0.547855		0.867101	1.83577	0.187408	0.491944
AT1G11125	AT1G11125	1.03074	1.96233	2.86459	2.11618	1.41228		0.931592	1.83385	1.08544	0.381542
AT1G78030	AT1G78030	0.710303	3.02084	2.54038	2.36361	0.263845		2.31054	1.83008	1.6533	-0.446458
AT4G27730	OPT6	2.47398	3.70392	4.29789	4.50386	4.43344		1.22994	1.82392	2.02988	1.95946
AT1G18940	AT1G18940	1.06778	2.2002	2.87735	2.32014	1.41193		1.13242	1.80957	1.25236	0.344155
AT3G11165	AT3G11165	0.128955	1.34168	1.93303	1.28564	0.21877		1.21272	1.80408	1.15668	0.089815
AT3G27650	LBD25	1.70311	3.82468	3.50699	3.53347	3.61126		2.12157	1.80389	1.83036	1.90816
AT5G63180	AT5G63180	3.52852	6.01366	5.32946	5.2749	4.74741		2.48515	1.80094	1.74639	1.21889
AT5G59220	HAI1	1.79393	3.95965	3.58754	3.08365	1.3104		2.16572	1.79362	1.28973	-0.483525
AT1G26945	PRE6	3.08876	5.15251	4.8778	4.52466	3.44749		2.06375	1.78904	1.4359	0.35873
AT3G12610	DRT100	4.32372	6.547	6.11157	6.26919	6.02346		2.22329	1.78785	1.94547	1.69974
AT2G46690	SAUR32	3.7392	6.19218	5.52479	5.69786	6.40446		2.45298	1.78559	1.95867	2.66526
AT4G06746	RAP2-9	2.08226	4.03234	3.86374	3.5375	4.12282		1.95008	1.78148	1.45524	2.04056
AT5G17800	AtMYB56	0.780894	2.52915	2.55898	2.28811	2.3326		1.74825	1.77809	1.50721	1.5517
AT5G23530	CXE18	3.11205	4.58975	4.88432	4.65934	4.47417		1.47769	1.77227	1.54728	1.36211
AT1G21320	AT1G21320	0.306269	1.96345	2.07836	1.32086	1.70711		1.65718	1.77209	1.01459	1.40085
AT1G73680	DOX2	4.28053	5.52606	6.04468	5.7442	4.48609		1.24553	1.76415	1.46367	0.205555
AT3G03530	NPC4	0.62808	2.00247	2.38746	3.62637	4.87152		1.37439	1.75938	2.99829	4.24344
AT3G21420	AT3G21420	2.34822	3.80718	4.10693	3.57382	3.62903		1.45895	1.7587	1.2256	1.2808
AT4G14640	CML8	0.838591	1.61515	2.59176	2.52888	2.94901		0.776558	1.75317	1.69029	2.11042
AT5G63990	SAL3	2.67905	4.5721	4.40635	4.68681	3.9779		1.89305	1.7273	2.00776	1.29885
AT1G05490	CLSY3	0.199773	1.02473	1.92548	0.487925	0.64047		0.824955	1.7257	0.288152	0.440697
AT3G21500	DXPS1	0	0.148676	1.72566	0.0657745	0.495778		0.148676	1.72566	0.0657745	0.495778
AT5G02750	SGR9	0.825475	2.10686	2.55052	2.06951	2.80267		1.28138	1.72504	1.24404	1.9772
AT1G56430	NAS4	2.04724	5.31603	3.76541	4.13322	2.95757		3.26879	1.71817	2.08598	0.910326
AT4G03400	DFL2	2.08848	3.26272	3.80589	5.00855	5.4753		1.17424	1.71741	2.92007	3.38682
AT1G78170	AT1G78170	3.65357	6.23529	5.36912	6.01808	5.54683		2.58172	1.71556	2.36451	1.89326
AT5G25610	RD22	5.44459	6.96298	7.15928	7.74034	6.0736		1.51839	1.71468	2.29575	0.629003
AT2G42610	LSH10	2.14961	3.24044	3.8605	3.84841	4.44315		1.09083	1.71089	1.6988	2.29354
AT5G54020	AT5G54020	0.588599	1.60429	2.29848	2.00498	0.599757		1.01569	1.70988	1.41638	0.0111581
AT1G35320	AT1G35320	3.84314	5.32509	5.55293	5.29778	4.82262		1.48196	1.70979	1.45464	0.979481
AT2G36090	AT2G36090	0.795527	3.06603	2.5025	2.65612	3.82389		2.27051	1.70697	1.86059	3.02836
AT2G41170	AT2G41170	2.46523	3.70084	4.17181	3.99304	3.21797		1.23562	1.70658	1.52781	0.752741
AT1G15580	IAA5	0.274644	1.62468	1.97947	0.983282	0.410745		1.35003	1.70482	0.708638	0.136101
AT5G66310	AT5G66310	2.52967	3.81197	4.21708	3.94471	3.50415		1.2823	1.68741	1.41504	0.974484
AT4G17680	AT4G17680	0.818064	2.35246	2.50091	2.22684	2.7172		1.5344	1.68284	1.40877	1.89914
AT4G13120	AT4G13120	1.97208	3.41174	3.64931	3.36663	2.36041		1.43966	1.67723	1.39454	0.388324
AT5G14760	AO	1.32744	2.43708	3.00383	2.63048	2.51047		1.10965	1.67639	1.30304	1.18303
AT5G51580	AT5G51580	1.2402	2.12394	2.91297	2.54931	2.38161		0.883744	1.67277	1.30911	1.14141
AT2G37370	AT2G37370	0.186357	1.27527	1.85578	1.19128	0.962807		1.08892	1.66942	1.00493	0.77645
AT3G62630	AT3G62630	3.18054	5.24985	4.84866	5.15667	5.18131		2.06931	1.66812	1.97612	2.00076
AT4G03060	AOP2	1.70346	3.04674	3.36638	3.36694	1.00183		1.34328	1.66291	1.66348	-0.701636
AT4G19700	BOI	3.8583	5.34926	5.5206	5.19286	5.73155		1.49096	1.66229	1.33456	1.87325
AT1G30080	AT1G30080	1.20986	2.61325	2.87126	2.53405	2.61287		1.40339	1.6614	1.3242	1.40301
AT5G44400	AT5G44400	1.26738	3.38796	2.9198	3.38573	4.06144		2.12058	1.65242	2.11835	2.79405
AT1G08230	GAT1	4.30011	5.94643	5.95176	6.09496	4.99706		1.64632	1.65165	1.79485	0.696948
AT1G59640	BPE	1.79046	2.87777	3.43995	3.12219	2.64426		1.0873	1.64948	1.33173	0.853801
AT3G22560	AT3G22560	0.31509	1.16272	1.96442	1.16499	1.07399		0.847629	1.64933	0.849898	0.7589
AT1G53700	WAG1	0.315431	0.846499	1.96095	0.966429	1.41436		0.531068	1.64552	0.650998	1.09893
AT4G34790	AT4G34790	0.946137	2.94232	2.59103	2.84312	3.17164		1.99619	1.64489	1.89699	2.2255
AT3G23870	AT3G23870	1.13631	2.26508	2.77861	3.02043	3.18446		1.12877	1.6423	1.88411	2.04815
AT3G03460	AT3G03460	1.42192	2.51513	3.06096	2.46224	1.84401		1.09321	1.63904	1.04032	0.422094
AT2G25625	AT2G25625	0.218451	2.02793	1.85264	1.12899	2.47781		1.80948	1.63419	0.910539	2.25936
AT5G67160	EPS1	1.07698	2.21336	2.70989	2.52298	2.00386		1.13639	1.63292	1.446	0.926884
AT2G29950	EFL1	1.33146	3.07914	2.96414	3.05161	2.26003		1.74769	1.63269	1.72015	0.928571
AT5G07000	SOT14	0.936286	2.30286	2.56469	2.77738	2.63682		1.36657	1.6284	1.8411	1.70053
AT2G32460	MYB101	0.0664502	0.371919	1.68746	0.339861	0.13688		0.305468	1.62101	0.273411	0.0704298
AT1G51530	AT1G51530	0.157134	0.572784	1.77431	0.494746	0.188127		0.41565	1.61717	0.337611	0.0309923
AT5G10440	CYCD4-2	1.0636	2.11245	2.67474	2.02305	1.32599		1.04885	1.61114	0.959452	0.262386
AT5G41900	AT5G41900	1.30761	3.39144	2.91233	2.95943	1.6156		2.08383	1.60472	1.65182	0.307992
AT4G29190	AT4G29190	3.67128	6.3307	5.27267	6.29986	6.82775		2.65942	1.60139	2.62858	3.15647
AT3G08990	AT3G08990	2.68398	3.88029	4.28415	3.95644	2.88337		1.19632	1.60017	1.27247	0.199393
AT5G48710	SUMO4	0	1.5233	1.6	0.76884	0.317369		1.5233	1.6	0.76884	0.317369
AT5G58460	CHX25	0	0.273769	1.59742	0.223229	0		0.273769	1.59742	0.223229	0
AT3G16800	AT3G16800	2.85324	4.39845	4.44798	4.78874	3.64739		1.5452	1.59473	1.93549	0.794148
AT4G24000	CSLG2	0.000407263	0.15706	1.59484	0.10642	0.361394		0.156652	1.59444	0.106013	0.360987
AT5G61490	AT5G61490	0.842413	1.84242	2.43674	2.44214	0.897516		1.00001	1.59432	1.59973	0.0551039
AT5G15580	LNG1	2.70392	4.27054	4.29561	4.30999	4.26172		1.56662	1.59169	1.60607	1.5578
AT1G24530	AT1G24530	3.64532	5.26234	5.23524	5.40593	4.70674		1.61702	1.58992	1.76061	1.06143
AT2G37380	MAKR3	1.16515	2.03539	2.75216	2.1807	2.20904		0.870244	1.58702	1.01556	1.0439
AT2G05520	GRP3	9.30293	11.1811	10.8883	11.3039	11.0081		1.8782	1.58542	2.00095	1.70522
AT2G18010	AT2G18010	0	1.57505	1.58133	0.736994	1.50205		1.57505	1.58133	0.736994	1.50205
AT4G21200	GA2OX8	0.966856	2.39691	2.54813	2.50971	1.83749		1.43006	1.58127	1.54286	0.870629
AT5G44670	AT5G44670	1.75256	3.01028	3.33341	3.42152	3.76819		1.25772	1.58086	1.66896	2.01563
AT1G72810	TS2	2.69618	4.39066	4.26907	4.41271	3.29919		1.69447	1.57289	1.71652	0.603004
AT1G74088	AT1G74088	1.44141	2.66414	3.00974	2.59918	2.74953		1.22273	1.56833	1.15777	1.30812
AT1G45010	AT1G45010	1.73627	3.45473	3.29951	2.84855	2.39893		1.71846	1.56324	1.11228	0.662658
AT5G55730	FLA1	3.41502	5.10888	4.97736	4.74036	4.24054		1.69386	1.56234	1.32534	0.825521
AT4G29020	AT4G29020	6.00507	7.7628	7.56599	7.9109	6.83259		1.75773	1.56092	1.90583	0.82752
AT5G24655	LSU4	0.225685	0.975646	1.78448	1.95942	3.93237		0.749962	1.5588	1.73373	3.70668
AT4G23990	CSLG3	0.552967	1.72405	2.11033	2.4764	1.03535		1.17109	1.55737	1.92343	0.48238
AT3G04040	AT3G04040	1.36223	2.55523	2.91826	2.49404	1.72131		1.193	1.55603	1.13181	0.359085
AT2G39435	AT2G39435	1.99512	3.50826	3.55005	3.87281	3.45908		1.51314	1.55493	1.87768	1.46396
AT1G65310	XTH17	2.64126	4.19649	4.19576	4.65841	4.59957		1.55522	1.5545	2.01714	1.9583
AT5G66420	AT5G66420	3.93906	5.34915	5.49254	5.43071	5.10556		1.41009	1.55347	1.49165	1.1665
AT4G28720	YUC8	0.7735	1.8868	2.32568	2.35166	2.48991		1.1133	1.55217	1.57816	1.71641
AT5G08260	SCPL35	4.59763	6.46616	6.14604	5.92455	5.36443		1.86854	1.54841	1.32692	0.7668
AT4G05320	UBQ10	8.65289	10.1536	10.1984	10.155	10.5534		1.50066	1.54552	1.50209	1.9005
AT3G27250	AT3G27250	0.082565	2.14872	1.6244	1.46397	0.414859		2.06615	1.54184	1.38141	0.332294
AT3G22540	AT3G22540	0.574519	2.333	2.10349	2.29085	2.55482		1.75848	1.52897	1.71633	1.9803
AT1G24575	AT1G24575	3.51714	4.8931	5.04384	5.25208	6.36959		1.37596	1.5267	1.73494	2.85245
AT5G15160	PRE2	1.65377	4.01652	3.17992	3.19922	2.6539		2.36276	1.52615	1.54545	1.00013
AT1G75590	AT1G75590	0.411127	1.79056	1.93644	1.55906	1.73126		1.37943	1.52532	1.14793	1.32013
AT5G52500	AT5G52500	0	0.314054	1.52167	0.0697654	0.017806		0.314054	1.52167	0.0697654	0.017806
AT1G05870	AT1G05870	3.4673	5.02179	4.9854	5.01958	4.7344		1.55449	1.51809	1.55227	1.2671
AT1G11545	XTH8	3.63265	5.63758	5.14943	5.90598	5.43573		2.00493	1.51678	2.27332	1.80308
AT1G75610	AT1G75610	0.198593	0.759462	1.71464	1.13608	0.0955315		0.560869	1.51605	0.937485	-0.103061
AT5G61290	AT5G61290	1.18998	3.1435	2.70062	2.83007	1.73441		1.95352	1.51065	1.64009	0.544437
AT1G16300	GAPCP2	2.70825	3.92872	4.21447	4.08502	3.65988		1.22047	1.50622	1.37677	0.951632
AT1G71890	SUC5	0.616221	2.31739	2.12114	1.71009	0.247336		1.70117	1.50492	1.09387	-0.368885
AT2G46640	AT2G46640	1.72823	4.49622	3.22966	2.99505	2.63833		2.76799	1.50144	1.26682	0.910099
AT5G21105	AT5G21105	5.3457	6.65044	6.84606	6.71979	6.3327		1.30474	1.50036	1.37409	0.987005
AT3G26120	TEL1	0.17326	0.450614	1.66826	0.527029	0.309868		0.277354	1.495	0.353769	0.136608
AT2G40475	AT2G40475	2.23796	4.36375	3.73061	4.37342	4.16937		2.12579	1.49265	2.13546	1.93141
AT2G22810	ACS4	0.0567301	0.375306	1.54341	0.362943	1.06173		0.318576	1.48668	0.306213	1.005
AT2G30766	AT2G30766	2.10657	6.35459	3.5932	4.06354	0.553212		4.24803	1.48664	1.95697	-1.55335
AT1G18400	BEE1	1.46066	2.9476	2.945	3.71566	2.89248		1.48694	1.48434	2.255	1.43183
AT5G22500	FAR1	3.13937	4.95674	4.62006	4.69004	4.47418		1.81737	1.48069	1.55067	1.33481
AT3G27500	AT3G27500	0.268286	1.81272	1.74828	1.59544	1.32894		1.54444	1.47999	1.32715	1.06066
AT1G64625	BHLH157	0.372773	1.54052	1.85052	1.18167	0.849748		1.16774	1.47774	0.808893	0.476975
AT5G04120	IPSP	0.27229	0.814906	1.74936	2.12606	4.16773		0.542615	1.47706	1.85377	3.89544
AT2G19780	AT2G19780	1.19192	2.6011	2.66678	2.32451	1.74454		1.40917	1.47486	1.13259	0.552612
AT5G66270	AT5G66270	0.657542	1.49352	2.12202	1.89231	1.65175		0.835979	1.46448	1.23476	0.994213
AT5G49690	UGT91C1	0.733233	1.89037	2.19698	1.80632	1.53097		1.15714	1.46375	1.07309	0.797736
AT3G23740	AT3G23740	1.46628	2.79215	2.92995	2.69728	2.3097		1.32587	1.46367	1.231	0.843417
AT1G73830	BEE3	0.723254	3.0009	2.18688	2.78987	3.35071		2.27765	1.46363	2.06661	2.62746
AT4G12880	ENODL19	5.03948	6.87909	6.49933	6.62621	6.65156		1.83961	1.45984	1.58672	1.61208
AT3G01100	HYP1	3.12749	4.52045	4.578	4.54251	4.59203		1.39296	1.45051	1.41502	1.46454
AT5G66690	UGT72E2	3.74334	6.0754	5.19069	6.34574	6.66525		2.33206	1.44734	2.60239	2.9219
AT4G11642	AT4G11642	0	0.25917	1.44159	0.287991	1.60984		0.25917	1.44159	0.287991	1.60984
AT3G62610	ATMYB11	0	0.533387	1.43738	0.255491	0.0296399		0.533387	1.43738	0.255491	0.0296399
AT4G29140	AT4G29140	3.38933	4.81425	4.82567	4.70802	4.54759		1.42492	1.43634	1.31868	1.15826
AT1G65920	AT1G65920	1.52211	2.48497	2.95291	2.5838	2.93897		0.962856	1.4308	1.06169	1.41685
AT2G35810	AT2G35810	4.46112	5.95842	5.89016	6.13159	6.69214		1.49731	1.42904	1.67048	2.23103
AT4G39330	CAD9	5.34353	7.02757	6.76951	7.16419	5.45517		1.68404	1.42598	1.82066	0.111638
AT4G16370	ATOPT3	4.40218	7.06558	5.82058	5.99045	5.45859		2.66339	1.4184	1.58827	1.05641
AT3G58780	AGL1	0.462888	1.69879	1.87882	1.07988	1.19128		1.23591	1.41593	0.616996	0.728388
AT3G07010	AT3G07010	4.08318	5.62186	5.49764	5.59073	5.52438		1.53868	1.41445	1.50755	1.4412
AT3G11740	AT3G11740	0.0322005	1.33201	1.44331	2.52977	0.192634		1.29981	1.41111	2.49756	0.160433
AT5G11440	CID5	0.492204	1.51836	1.90261	1.79765	1.76822		1.02615	1.41041	1.30544	1.27602
AT3G60440	AT3G60440	3.5999	5.20146	5.01012	5.14884	4.12904		1.60156	1.41022	1.54894	0.529146
AT2G38010	AT2G38010	2.29797	3.46578	3.70618	3.69477	3.56413		1.16781	1.40822	1.39681	1.26617
AT1G34060	TAR4	0.700632	1.64897	2.10682	2.06557	2.77782		0.948339	1.40619	1.36494	2.07719
AT3G25790	AT3G25790	1.72247	3.04599	3.12755	3.29478	3.64285		1.32352	1.40509	1.57231	1.92038
AT3G05740	RECQL1	0.920509	2.02012	2.3251	1.97088	1.61725		1.09961	1.40459	1.05037	0.696746
AT1G24620	CML25	0.191012	0.937065	1.59201	1.11438	1.19616		0.746053	1.40099	0.923365	1.00515
AT2G35070	AT2G35070	0.154354	1.61609	1.55489	0.763131	0.405767		1.46174	1.40053	0.608778	0.251413
AT5G23230	NIC2	0.799903	2.53833	2.19441	2.76639	1.44488		1.73843	1.3945	1.96649	0.644974
AT3G47500	CDF3	1.44322	2.73278	2.83343	3.23579	3.17394		1.28956	1.39022	1.79257	1.73073
AT3G03440	AT3G03440	1.85932	3.14145	3.2494	3.00397	3.18733		1.28213	1.39008	1.14465	1.32801
AT1G74205	AT1G74205	0.957442	1.80395	2.3463	2.30288	1.67746		0.846509	1.38886	1.34544	0.720015
AT4G34810	AT4G34810	2.0649	4.22203	3.45109	4.3939	3.73796		2.15713	1.38619	2.329	1.67306
AT5G66980	AT5G66980	0	0.624575	1.37638	1.12895	0.083861		0.624575	1.37638	1.12895	0.083861
AT4G28530	anac074	0.429577	1.31804	1.80581	1.85919	2.34121		0.888458	1.37623	1.42961	1.91163
AT3G13672	AT3G13672	0.745709	2.13802	2.11776	2.14172	2.36802		1.39232	1.37205	1.39601	1.62231
AT5G65100	EIL5	0	0.150761	1.37072	0.363713	0.034065		0.150761	1.37072	0.363713	0.034065
AT1G62370	AT1G62370	1.55293	3.13063	2.91503	3.42261	3.89186		1.5777	1.36209	1.86967	2.33892
AT4G22250	AT4G22250	2.1487	3.31847	3.50852	3.38096	2.69614		1.16976	1.35981	1.23226	0.547433
AT2G43340	AT2G43340	3.70952	5.36806	5.06888	5.16483	5.40503		1.65854	1.35936	1.4553	1.69551
AT5G03495	AT5G03495	1.38098	3.33284	2.73889	2.8358	2.05678		1.95187	1.35791	1.45483	0.675801
AT3G52525	OFP6	1.79078	2.98801	3.14466	3.50333	2.50132		1.19723	1.35388	1.71255	0.710544
AT2G43018	CPuORF17	3.01348	4.27767	4.36674	4.42176	4.7895		1.26419	1.35325	1.40827	1.77602
AT2G46140	AT2G46140	3.65894	4.91888	5.00632	5.1181	5.4385		1.25995	1.34739	1.45916	1.77957
AT1G15670	AT1G15670	3.72231	5.30847	5.06378	5.48023	5.62616		1.58616	1.34146	1.75792	1.90385
AT5G45580	AT5G45580	0.670332	2.01796	2.00668	2.23702	2.68158		1.34763	1.33635	1.56669	2.01125
AT2G28200	ZAT5	1.90972	3.71734	3.24407	3.98939	4.55927		1.80762	1.33435	2.07967	2.64955
AT3G50610	AT3G50610	0	0.419605	1.32131	0.215616	0.268464		0.419605	1.32131	0.215616	0.268464
AT1G73860	AT1G73860	0.434359	0.915267	1.74832	1.42878	1.59762		0.480908	1.31396	0.994418	1.16326
AT5G39865	AT5G39865	0.386778	1.19943	1.69659	1.151	1.24488		0.812657	1.30981	0.764219	0.858106
AT2G19810	AT2G19810	4.00076	6.42239	5.30585	5.61138	5.08904		2.42163	1.30509	1.61063	1.08828
AT5G54130	AT5G54130	2.21051	3.69038	3.50537	4.28065	4.57343		1.47986	1.29486	2.07014	2.36292
AT1G68880	AtbZIP	1.07089	2.94714	2.36146	2.98226	3.07145		1.87625	1.29057	1.91137	2.00055
AT1G79180	ATMYB63	0.846751	1.86789	2.13622	2.29612	2.68814		1.02114	1.28947	1.44937	1.84139
AT4G34770	AT4G34770	0.562215	2.67073	1.84567	2.93329	2.39968		2.10852	1.28346	2.37107	1.83747
AT5G20820	AT5G20820	0.506127	2.57565	1.78114	1.69149	1.84749		2.06952	1.27501	1.18536	1.34136
AT3G50750	BEH1	2.70365	4.22476	3.97675	4.41317	4.21313		1.52111	1.2731	1.70953	1.50949
AT3G55130	ABCG19	2.81859	4.74583	4.09064	4.85274	3.99601		1.92724	1.27205	2.03415	1.17742
AT4G25760	GDU2	0.673632	1.72602	1.94485	2.08708	3.32926		1.05239	1.27122	1.41345	2.65563
AT2G32990	AtGH9B8	1.97379	3.43827	3.23705	4.17704	4.0368		1.46448	1.26326	2.20325	2.06301
AT2G42320	AT2G42320	3.33166	5.24824	4.59274	4.77389	5.00028		1.91658	1.26108	1.44223	1.66862
AT5G42840	AT5G42840	0.318454	1.32212	1.5777	1.45076	1.08638		1.00367	1.25925	1.1323	0.767928
AT2G46990	IAA20	0.489836	1.73894	1.74815	2.03969	0.82174		1.2491	1.25831	1.54985	0.331904
AT3G61897	MIR166B	1.06167	2.0785	2.31821	2.06465	2.95314		1.01683	1.25654	1.00298	1.89147
AT3G58120	BZIP61	3.83375	5.32313	5.08293	6.05652	5.43345		1.48938	1.24918	2.22277	1.59971
AT3G20898	AT3G20898	1.71733	3.05908	2.96595	2.8412	3.26737		1.34175	1.24861	1.12387	1.55004
AT2G23220	CYP81D6	0	0.387109	1.24716	0.0903896	0		0.387109	1.24716	0.0903896	0
AT5G22310	AT5G22310	1.43697	3.10897	2.68045	2.52523	3.39195		1.672	1.24348	1.08826	1.95498
AT5G46050	NPF5.2	1.64646	2.94901	2.88915	3.88095	3.58983		1.30255	1.24269	2.23449	1.94337
AT1G71770	PAB5	0.269077	0.607966	1.50968	0.895401	0.189941		0.338889	1.2406	0.626324	-0.0791365
AT1G01680	PUB54	0.389865	2.02571	1.62975	1.98102	2.16611		1.63584	1.23988	1.59115	1.77624
AT1G75780	TUBB1	3.2539	5.04613	4.48713	5.18593	5.34583		1.79223	1.23323	1.93203	2.09193
AT4G36240	GATA7	1.57734	2.94243	2.80293	2.75133	2.86235		1.3651	1.2256	1.174	1.28502
AT1G28570	AT1G28570	2.11905	4.00713	3.34449	3.49801	3.46273		1.88808	1.22544	1.37896	1.34369
AT5G20670	AT5G20670	0.219458	1.7797	1.4389	2.21255	1.76023		1.56024	1.21944	1.99309	1.54077
AT5G06310	POT1B	1.86492	2.92646	3.08217	3.18789	2.87485		1.06153	1.21725	1.32297	1.00992
AT4G27595	AT4G27595	1.70271	2.96866	2.91588	3.12203	2.76862		1.26595	1.21317	1.41932	1.06591
AT2G45780	AT2G45780	0.405008	1.32142	1.61648	1.9557	0.630121		0.91641	1.21147	1.55069	0.225112
AT5G40270	AT5G40270	2.95328	4.13916	4.1642	4.25505	3.46691		1.18588	1.21091	1.30177	0.513632
AT1G14960	AT1G14960	0.933964	3.17437	2.14039	5.64043	5.18858		2.24041	1.20642	4.70647	4.25462
AT4G17695	KAN3	2.05079	3.62313	3.25659	3.36744	2.58264		1.57234	1.2058	1.31665	0.531845
AT1G56555	AT1G56555	0.492827	1.28654	1.69549	1.26895	0.972756		0.793714	1.20266	0.776127	0.479929
AT3G03910	GSH3	0.0699546	0.463905	1.27072	0.510638	0.559795		0.39395	1.20077	0.440683	0.48984
AT4G14440	ECI3	4.22522	5.84604	5.42329	6.00725	5.13174		1.62082	1.19807	1.78202	0.906513
AT2G19650	AT2G19650	0.708343	2.03753	1.90519	2.23133	1.7793		1.32919	1.19684	1.52299	1.07096
AT4G18250	AT4G18250	1.40704	3.25928	2.60226	2.54327	2.95261		1.85224	1.19522	1.13623	1.54557
AT4G12290	AT4G12290	4.09946	5.35221	5.29396	5.44811	6.22762		1.25275	1.1945	1.34865	2.12816
AT1G28080	AT1G28080	0.685961	1.6837	1.87986	1.95276	0.940626		0.997738	1.1939	1.2668	0.254665
AT3G13980	AT3G13980	2.03042	3.42846	3.22364	3.65772	3.6622		1.39804	1.19323	1.6273	1.63179
AT3G26932	DRB3	3.04733	4.28928	4.23798	4.65826	4.28181		1.24195	1.19065	1.61093	1.23448
AT1G64390	AtGH9C2	4.38806	5.95462	5.57059	5.76169	5.43477		1.56656	1.18253	1.37364	1.04672
AT3G26200	CYP71B22	1.10843	2.73494	2.29093	3.28313	3.68071		1.62651	1.1825	2.17471	2.57229
AT2G36570	PXC1	2.32046	3.72889	3.49999	3.60855	4.13008		1.40843	1.17953	1.28809	1.80962
AT1G78840	AT1G78840	0.182833	0.640607	1.36046	0.835087	0.0178165		0.457774	1.17763	0.652254	-0.165016
AT1G68570	NPF3.1	2.55847	4.67191	3.73232	4.76829	4.43646		2.11344	1.17385	2.20983	1.878
AT5G50800	SWEET13	0.168939	0.951305	1.33859	0.555459	1.25027		0.782365	1.16965	0.38652	1.08133
AT4G23200	CRK12	0.237368	2.51631	1.40552	2.78635	1.78607		2.27894	1.16816	2.54899	1.5487
AT1G08990	GUX5	1.65677	2.75002	2.82484	3.08642	3.30262		1.09325	1.16807	1.42965	1.64585
AT2G07070	AT2G07070	0	0.284021	1.1664	0.267311	0.0169897		0.284021	1.1664	0.267311	0.0169897
AT5G65320	BHLH99	0.273912	1.63067	1.43136	1.45059	1.5625		1.35676	1.15744	1.17668	1.28859
AT2G42040	AT2G42040	4.23733	6.73726	5.39468	6.73933	5.65727		2.49992	1.15734	2.50199	1.41993
AT2G32100	OFP16	1.16074	3.33821	2.31554	3.82245	3.663		2.17747	1.15481	2.66171	2.50226
AT1G16500	AT1G16500	2.49027	4.2005	3.64194	3.89087	4.63878		1.71022	1.15167	1.4006	2.14851
AT1G07390	AtRLP1	1.14856	2.1128	2.29465	2.21089	1.47261		0.964238	1.14609	1.06233	0.324047
AT4G31910	AT4G31910	2.76362	4.81819	3.90747	4.76846	5.09509		2.05457	1.14385	2.00484	2.33147
AT5G06190	AT5G06190	2.06533	3.47152	3.20871	3.2769	2.84085		1.40619	1.14338	1.21156	0.775519
AT1G69160	AT1G69160	2.48535	4.23256	3.62443	4.54173	4.05743		1.74721	1.13908	2.05638	1.57208
AT5G20700	AT5G20700	7.07915	8.69062	8.21562	8.52709	8.66876		1.61147	1.13647	1.44794	1.58961
AT5G40040	RPP2E	0.172909	1.83045	1.30737	1.82314	0.270919		1.65754	1.13446	1.65023	0.0980093
AT1G34245	EPF2	1.42432	2.95502	2.55828	3.22206	2.39701		1.5307	1.13396	1.79774	0.972693
AT5G02420	SMR3	1.93239	3.02023	3.05981	3.27896	3.94536		1.08784	1.12742	1.34657	2.01297
AT5G49680	KIP	1.44191	2.42175	2.56247	3.13326	2.8352		0.979837	1.12056	1.69135	1.39329
AT1G18970	GLP1	0.985075	2.80744	2.10493	2.57334	3.7609		1.82236	1.11986	1.58827	2.77582
AT5G23220	NIC3	1.82446	3.36674	2.93929	3.69869	3.49651		1.54228	1.11483	1.87422	1.67205
AT5G37950	AT5G37950	0	0.388032	1.1144	0.346898	0.393043		0.388032	1.1144	0.346898	0.393043
AT5G25110	CIPK25	0.744813	2.7513	1.85554	2.78301	3.77623		2.00649	1.11073	2.0382	3.03141
AT1G22640	MYB3	3.46772	5.17316	4.57307	5.15905	5.14135		1.70544	1.10535	1.69133	1.67364
AT5G24910	CYP714A1	0.903331	2.07863	1.99556	2.13148	2.04497		1.1753	1.09223	1.22815	1.14163
AT2G39380	ATEXO70H2	1.94585	3.4279	3.03107	3.72115	3.27434		1.48205	1.08522	1.77529	1.32849
AT1G54120	AT1G54120	1.30787	3.09586	2.38794	3.12099	3.15044		1.788	1.08007	1.81313	1.84257
AT3G53200	AtMYB27	0.331267	1.15239	1.40991	0.868564	1.16474		0.821126	1.07865	0.537297	0.833478
AT3G21890	AT3G21890	0	0.29912	1.07542	0.539394	0.373483		0.29912	1.07542	0.539394	0.373483
AT4G32980	ATH1	3.05317	4.55374	4.12575	4.454	2.98705		1.50057	1.07258	1.40083	-0.0661237
AT4G24070	AT4G24070	0	0.782059	1.0721	0.49008	0.0727132		0.782059	1.0721	0.49008	0.0727132
AT5G21100	AT5G21100	2.0605	3.40333	3.12992	3.26473	3.1285		1.34284	1.06942	1.20423	1.068
AT1G18835	MIF3	0.589252	2.11825	1.65256	1.70409	1.9613		1.52899	1.06331	1.11483	1.37205
AT5G45095	AT5G45095	0.225316	0.943834	1.28854	0.999253	0.124027		0.718517	1.06322	0.773936	-0.101289
AT2G41810	AT2G41810	0.134709	0.729528	1.19674	0.872031	0.247373		0.594819	1.06203	0.737322	0.112664
AT2G12461	AT2G12461	1.98331	3.86389	3.02909	3.70117	2.96723		1.88058	1.04578	1.71786	0.983916
AT4G02710	NET1C	2.8865	4.23422	3.93095	4.47536	3.82519		1.34772	1.04444	1.58886	0.938682
AT1G22900	DIR11	2.32211	4.37125	3.3626	3.85199	3.75276		2.04914	1.04049	1.52988	1.43065
AT5G19650	OFP8	0.249919	1.41956	1.28784	1.10587	0.978248		1.16965	1.03792	0.855955	0.728329
AT4G34320	AT4G34320	0.439283	1.03769	1.47501	1.12388	1.66212		0.598407	1.03573	0.684602	1.22284
AT1G06330	AT1G06330	0.114948	0.759268	1.14581	1.17238	1.16631		0.644319	1.03086	1.05743	1.05136
AT5G17090	AT5G17090	0.0601779	0.419601	1.08987	0.967974	0.433644		0.359423	1.02969	0.907796	0.373466
AT1G13370	AT1G13370	0.26251	2.34685	1.28909	1.98315	0.924206		2.08434	1.02658	1.72064	0.661697
AT3G15300	VQ19	1.53705	3.42214	2.55088	2.89061	3.52169		1.88509	1.01383	1.35356	1.98464
AT3G04070	anac047	2.76685	3.99756	3.77992	4.59728	4.7081		1.23071	1.01308	1.83044	1.94125
AT4G22900	AT4G22900	0.753618	1.90905	1.766	1.7389	1.3288		1.15543	1.01238	0.985284	0.575179
AT3G14280	AT3G14280	2.49538	4.5093	3.50661	4.05993	4.14783		2.01392	1.01123	1.56456	1.65245
AT3G50330	HEC2	0	0.400275	1.00851	0.213092	0.0681631		0.400275	1.00851	0.213092	0.0681631
AT4G02100	AT4G02100	2.62446	3.91261	3.63188	4.0254	4.0084		1.28815	1.00742	1.40094	1.38395
AT4G18660	AT4G18660	0	0.0796819	1.00075	0.106979	0.0196431		0.0796819	1.00075	0.106979	0.0196431
AT2G35340	MEE29	1.67575	3.23481	2.67448	3.93803	2.93191		1.55906	0.998725	2.26228	1.25615
AT3G18400	anac058	1.41818	2.95556	2.40981	3.22855	3.11039		1.53739	0.991633	1.81037	1.69222
AT1G76420	NAC031	0.18031	0.757685	1.16933	0.61274	0.647954		0.577375	0.989015	0.43243	0.467643
AT3G04050	AT3G04050	0.383377	1.02455	1.36999	1.19361	0.944461		0.641175	0.986608	0.810229	0.561084
AT5G20740	AT5G20740	2.32218	4.35783	3.30868	4.42626	1.66375		2.03565	0.986509	2.10408	-0.658426
AT1G80760	NIP6-1	0.864376	3.09235	1.85013	3.06646	3.18322		2.22797	0.98575	2.20209	2.31884
AT5G47330	AT5G47330	2.28907	4.80952	3.27	4.7296	1.81549		2.52045	0.98093	2.44052	-0.473582
AT4G25110	AMC2	0.816989	1.9234	1.79427	2.08073	1.73998		1.10642	0.977279	1.26374	0.92299
AT1G53035	AT1G53035	2.33378	4.00151	3.31097	3.52624	3.6324		1.66773	0.977188	1.19246	1.29862
AT5G56990	AT5G56990	1.75855	2.98094	2.7354	3.28225	2.05369		1.22238	0.976851	1.5237	0.29514
AT4G22560	AT4G22560	1.08862	2.39715	2.0626	2.52742	1.90349		1.30852	0.973972	1.43879	0.814871
AT5G49120	AT5G49120	0.201103	1.17922	1.16886	1.49874	1.73061		0.978114	0.967762	1.29764	1.5295
AT5G54040	AT5G54040	1.16222	2.8466	2.12059	2.60896	2.04925		1.68438	0.958375	1.44674	0.88703
AT2G38823	AT2G38823	1.44677	3.13949	2.40186	3.01609	2.34965		1.69272	0.955089	1.56931	0.902881
AT1G01420	UGT72B3	1.79224	3.24718	2.7418	3.32082	2.92816		1.45495	0.94956	1.52859	1.13593
AT4G25150	AT4G25150	1.49804	2.60814	2.44538	2.64835	2.17723		1.1101	0.947341	1.15031	0.679194
AT1G01670	PUB56	1.08829	2.48623	2.02822	3.16092	1.76302		1.39794	0.939937	2.07263	0.674732
AT3G28420	AT3G28420	0.699679	1.48549	1.63186	1.654	1.03319		0.785816	0.932185	0.954317	0.333512
AT1G75600	AT1G75600	0.144065	1.14087	1.07573	0.780652	0.34034		0.996804	0.931663	0.636587	0.196276
AT1G49000	AT1G49000	1.46247	3.17159	2.39243	2.73738	2.25171		1.70913	0.929966	1.27492	0.789248
AT1G53080	AT1G53080	0.0754623	0.748735	1.00403	0.561968	0.0676607		0.673273	0.928571	0.486506	-0.00780161
AT2G36210	AT2G36210	0.204151	1.22508	1.12943	1.85833	1.88803		1.02093	0.925275	1.65418	1.68388
AT4G39720	AT4G39720	1.19644	2.19558	2.12159	2.37623	2.9153		0.99914	0.92515	1.17979	1.71886
AT5G51670	AT5G51670	1.54946	2.66026	2.47121	2.81558	2.72776		1.1108	0.921751	1.26613	1.1783
AT5G53030	AT5G53030	1.94087	3.23415	2.85214	3.14727	2.54856		1.29328	0.91127	1.20639	0.607689
AT4G05030	AT4G05030	0.0572636	1.13605	0.956213	1.07017	0.528589		1.07879	0.898949	1.0129	0.471325
AT1G19630	CYP722A1	0.0337831	0.719866	0.91983	0.365337	0.804747		0.686083	0.886047	0.331554	0.770964
AT2G39885	MIR393A	0.0406274	0.931894	0.926593	0.606543	0.701799		0.891267	0.885965	0.565915	0.661172
AT5G26930	GATA23	0.0490001	0.303699	0.931092	0.597504	0.506872		0.254699	0.882092	0.548503	0.457872
AT3G63088	RTFL14	0.267411	2.14408	1.14071	1.96528	2.28354		1.87667	0.873304	1.69787	2.01613
AT5G03668	AT5G03668	0.0383041	0.322712	0.911418	0.251351	0.168253		0.284408	0.873113	0.213047	0.129949
AT2G42200	SPL9	0.922546	2.37325	1.791	2.11209	1.87633		1.4507	0.868454	1.18955	0.95378
AT4G03292	AT4G03292	0.104063	0.559066	0.969893	0.860989	0.331661		0.455003	0.86583	0.756926	0.227597
AT1G49005	CLE11	0.0531521	0.459324	0.91824	0.482933	0.501556		0.406171	0.865088	0.429781	0.448404
AT3G49820	AT3G49820	0.426684	1.16375	1.27802	1.39919	1.03792		0.737066	0.851332	0.972509	0.611233
AT1G19640	JMT	0.0314126	0.248019	0.875015	0.454477	0.27371		0.216606	0.843603	0.423065	0.242297
AT1G30050	AT1G30050	0.0835856	0.498306	0.926282	0.827426	0.700836		0.41472	0.842696	0.743841	0.61725
AT1G35255	AT1G35255	0.278069	0.727637	1.11978	0.751084	0.900707		0.449568	0.841709	0.473015	0.622638
AT2G28690	AT2G28690	0.244989	1.44235	1.08014	1.46411	2.56342		1.19736	0.835155	1.21912	2.31843
AT5G56840	AT5G56840	0.771643	2.44394	1.60223	3.23382	3.34693		1.6723	0.830584	2.46218	2.57529
AT1G07885	AT1G07885	0	1.10085	0.829555	1.53987	0.419348		1.10085	0.829555	1.53987	0.419348
AT1G62870	AT1G62870	0.637825	1.41277	1.46384	1.37125	1.80153		0.774945	0.826014	0.733422	1.16371
AT4G09820	TT8	0.0639686	0.658705	0.885711	0.615316	0.376057		0.594736	0.821743	0.551348	0.312088
AT4G31320	AT4G31320	1.24608	2.38348	2.06019	3.28667	4.3732		1.1374	0.814111	2.04059	3.12712
AT1G79320	AMC6	0.658065	2.30638	1.46569	2.9167	3.28716		1.64831	0.807628	2.25864	2.6291
AT1G32740	AT1G32740	1.11657	2.06432	1.91817	2.2203	2.30063		0.947752	0.801606	1.10374	1.18406
AT1G65890	AAE12	0.188321	0.88765	0.983905	0.706431	0.700969		0.699329	0.795584	0.51811	0.512648
AT5G06510	NFYA10	0.590312	1.68674	1.38452	1.3016	2.98447		1.09643	0.794208	0.711284	2.39416
AT2G26290	ARSK1	1.24797	2.59502	2.0393	2.66372	2.6071		1.34705	0.791336	1.41575	1.35913
AT5G01180	NPF8.2	0.730227	1.57042	1.50561	1.44371	1.69225		0.840196	0.775381	0.713479	0.962023
AT5G13990	ATEXO70C2	1.00642	1.96579	1.77838	2.49751	2.48095		0.959367	0.771953	1.49109	1.47453
AT1G71015	AT1G71015	0.745831	1.64759	1.50132	1.70918	2.35844		0.901755	0.755488	0.963353	1.61261
AT2G28780	AT2G28780	0.888879	1.80579	1.64151	1.91895	1.42831		0.916909	0.752631	1.03007	0.539435
AT4G17710	HDG4	0.0266641	0.72465	0.77615	0.667535	0.317819		0.697986	0.749486	0.640871	0.291155
AT2G31230	ERF15	0.873752	2.68692	1.61644	2.69776	4.13843		1.81317	0.742684	1.82401	3.26468
AT5G64690	AT5G64690	0.448638	2.11593	1.18937	2.61914	1.29934		1.66729	0.740727	2.1705	0.850701
AT4G16162	AT4G16162	0.504506	2.32882	1.24164	2.72991	0.348889		1.82432	0.737137	2.22541	-0.155617
AT2G38520	AT2G38520	0.0694561	0.950837	0.804151	0.829396	0		0.881381	0.734695	0.759939	-0.0694561
AT1G65180	AT1G65180	0.744956	1.68928	1.47704	2.65824	2.32385		0.944324	0.732087	1.91328	1.57889
AT1G17235	RTFL11	0.718618	1.66736	1.44973	1.76086	1.29817		0.948741	0.731109	1.04224	0.579552
AT3G22410	AT3G22410	0.766649	1.65389	1.4917	1.77557	2.29729		0.887237	0.725053	1.00892	1.53065
AT1G66390	MYB90	0	0.167593	0.705817	1.24559	0.302611		0.167593	0.705817	1.24559	0.302611
AT5G55340	AT5	0.42884	1.86867	1.13191	1.18132	0.687119		1.43983	0.703072	0.752485	0.25828
AT5G12970	AT5G12970	1.06442	1.97171	1.76288	2.06401	2.43092		0.907291	0.69846	0.999588	1.3665
AT3G05660	AtRLP33	0.36161	1.45424	1.05828	1.39566	2.16906		1.09263	0.696668	1.03405	1.80745
AT5G18930	SAMDC4	0.910926	1.97009	1.60458	1.80781	1.39967		1.05916	0.693651	0.896887	0.488745
AT5G40590	AT5G40590	0.573391	2.44651	1.25537	2.31935	1.85384		1.87312	0.68198	1.74595	1.28045
AT4G22090	AT4G22090	0	0.338272	0.6781	0.98698	0.137955		0.338272	0.6781	0.98698	0.137955
AT1G63930	ROH1	0.585998	1.319	1.26241	1.56391	1.53847		0.733001	0.676413	0.97791	0.952474
AT3G45000	VPS24-2	0.0302287	0.224374	0.700265	1.21182	1.82504		0.194145	0.670037	1.18159	1.79481
AT1G64618	AT1G64618	0	0.418216	0.66715	0.546131	0.384561		0.418216	0.66715	0.546131	0.384561
AT3G26010	AT3G26010	0.000714919	0.270017	0.666486	0.646628	0.0392797		0.269302	0.665771	0.645914	0.0385648
AT1G58330	ZW2	0	0.359307	0.665724	0.319322	0.406085		0.359307	0.665724	0.319322	0.406085
AT3G63360	AT3G63360	0.0754477	0.523037	0.739035	1.2788	0.682766		0.447589	0.663587	1.20335	0.607318
AT3G53010	AT3G53010	0.69232	1.38973	1.3439	1.58748	1.39411		0.697413	0.65158	0.895163	0.701786
AT3G25795	AT3G25795	0.466142	1.04907	1.11588	1.15699	1.51976		0.582925	0.649739	0.690844	1.05361
AT3G13130	AT3G13130	0	0.836037	0.641171	0.643592	0.347592		0.836037	0.641171	0.643592	0.347592
AT2G01960	TET14	0	0.156695	0.63531	0.32565	0		0.156695	0.63531	0.32565	0
AT2G43270	AT2G43270	0.0249499	0.23653	0.658337	0.187365	0.0915514		0.21158	0.633387	0.162415	0.0666015
AT3G05770	AT3G05770	0.16191	0.438904	0.7864	0.783543	0.8489		0.276994	0.62449	0.621633	0.686991
AT5G38540	JAL43	0.17712	1.48665	0.791707	0.462925	2.00714		1.30953	0.614587	0.285805	1.83002
AT5G65090	MRH3	0.615756	1.3091	1.22346	1.55676	2.09381		0.69334	0.607705	0.941009	1.47805
AT4G28790	BHLH23	0.222	0.647833	0.827461	0.621524	1.13437		0.425832	0.605461	0.399523	0.912365
AT1G48260	CIPK17	0.720143	1.53764	1.31875	2.03079	2.56573		0.817496	0.598611	1.31065	1.84558
AT4G18690	AT4G18690	0	0.173459	0.595384	0.234608	0.316956		0.173459	0.595384	0.234608	0.316956
AT4G19430	AT4G19430	0	1.39785	0.594269	0.777124	1.50089		1.39785	0.594269	0.777124	1.50089
AT4G00305	AT4G00305	0.518786	1.19898	1.10966	1.44752	1.86572		0.680196	0.590878	0.928729	1.34694
AT3G02610	S-ACP-DES2	0.499197	1.36777	1.08448	1.44129	1.68699		0.868576	0.585281	0.942097	1.18779
AT4G21760	BGLU47	0.406081	1.23459	0.985956	1.19823	0.800366		0.828506	0.579875	0.792151	0.394285
AT1G17744	AT1G17744	0.0230083	0.476441	0.601213	0.557081	0.595455		0.453432	0.578205	0.534073	0.572447
AT2G44990	CCD7	0	0.150705	0.570294	0.0804421	0.130148		0.150705	0.570294	0.0804421	0.130148
AT5G49620	MYB78	0.377974	0.848566	0.945453	1.04591	1.9562		0.470592	0.567479	0.667936	1.57822
AT5G18910	AT5G18910	0.0827889	0.311312	0.649589	0.918651	0.910862		0.228523	0.5668	0.835862	0.828073
AT2G04070	DTXL2	0.0155751	0.629414	0.580399	0.268676	0.504538		0.613838	0.564824	0.253101	0.488963
AT3G45530	AT3G45530	0.369746	0.818617	0.925344	0.97234	1.41704		0.448871	0.555598	0.602593	1.04729
AT3G14320	ATL61	0.0352025	0.534141	0.590256	1.01594	0.124966		0.498938	0.555054	0.98074	0.089763
AT4G25950	VHA-G3	0.0703348	0.644054	0.618856	0.758149	0.463369		0.57372	0.548521	0.687815	0.393034
AT2G34655	AT2G34655	0.197962	1.58364	0.740143	2.63213	2.41019		1.38568	0.542181	2.43417	2.21223
AT1G74545	AT1G74545	0.497039	1.20233	1.03175	1.21993	0.944664		0.705288	0.534711	0.722892	0.447625
AT1G26410	AT1G26410	0.028125	0.896022	0.55338	0.125688	1.60224		0.867897	0.525255	0.0975627	1.57412
AT1G10385	EXO84A	0.0543007	0.294452	0.579333	0.77953	0.543938		0.240151	0.525032	0.725229	0.489638
AT4G20450	AT4G20450	0.0821262	0.889011	0.601923	1.28788	1.15536		0.806885	0.519797	1.20575	1.07323
AT3G05650	AtRLP32	0.550916	1.51776	1.06293	1.62308	2.13564		0.966846	0.512009	1.07217	1.58472
AT2G45040	AT2G45040	0.371942	1.07518	0.877018	1.02443	1.15753		0.70324	0.505077	0.652484	0.78559
AT4G24010	CSLG1	0.0461287	0.302513	0.54358	0.174676	0.299295		0.256385	0.497451	0.128547	0.253166
AT4G18350	NCED2	0.139312	0.54309	0.615456	0.494658	0.139772		0.403778	0.476144	0.355346	0.000459701
AT4G32950	AT4G32950	0.294567	1.6786	0.761359	1.52859	2.19526		1.38404	0.466792	1.23402	1.9007
AT5G41380	AT5G41380	0.129441	0.625357	0.594265	0.512051	0.77888		0.495916	0.464824	0.38261	0.649438
AT1G74080	MYB122	0.470434	1.19942	0.935063	1.69511	1.22345		0.728984	0.464628	1.22468	0.753015
AT3G58070	GIS	0.404477	1.51649	0.848933	1.80598	1.09575		1.11202	0.444456	1.4015	0.69127
AT1G17310	AT1G17310	0.30523	0.983298	0.723116	1.39007	0.951854		0.678068	0.417886	1.08484	0.646623
AT1G80730	ZFP1	0.357348	1.83475	0.769877	0.894418	0.516131		1.4774	0.412529	0.53707	0.158783
AT1G55700	AT1G55700	0.0858828	0.246498	0.484216	0.393977	0.3612		0.160615	0.398333	0.308095	0.275317
AT2G04680	AT2G04680	0.263045	0.783559	0.660806	1.19687	1.46797		0.520514	0.397762	0.933829	1.20493
AT1G18410	AT1G18410	0.15675	0.700957	0.552207	1.06928	0.416434		0.544207	0.395457	0.912526	0.259684
AT3G14380	AT3G14380	0	0.265829	0.392533	0.405676	0.070682		0.265829	0.392533	0.405676	0.070682
AT4G18980	AtS40-3	0.119043	0.615757	0.50188	0.602867	0.557881		0.496714	0.382837	0.483824	0.438839
AT4G10370	AT4G10370	0.336454	1.50701	0.70331	1.93325	1.98371		1.17056	0.366856	1.59679	1.64726
AT5G05840	AT5G05840	0.0671848	0.801856	0.425355	1.19355	1.24138		0.734671	0.35817	1.12636	1.1742
AT5G60060	AT5G60060	0.0957345	0.469267	0.441831	0.742446	0.774757		0.373533	0.346096	0.646711	0.679023
AT1G07540	TRP5	0	0.287219	0.339628	0.142719	0		0.287219	0.339628	0.142719	0
AT3G61880	CYP78A9	0.178062	0.519944	0.516657	0.595165	0.878418		0.341881	0.338595	0.417102	0.700355
AT3G03670	PER28	0	0.521866	0.333546	0.826471	0.29769		0.521866	0.333546	0.826471	0.29769
AT4G25845	AT4G25845	0	0.329366	0.33026	0.315448	0.354146		0.329366	0.33026	0.315448	0.354146
AT1G67481	MIR839A	0	0.426689	0.310741	0.963501	0.492935		0.426689	0.310741	0.963501	0.492935
AT1G55440	AT1G55440	0.0619808	0.389179	0.369142	0.443551	0.192966		0.327198	0.307161	0.38157	0.130985
AT4G13985	FBD1	0	0.349692	0.306593	1.00985	0		0.349692	0.306593	1.00985	0
AT1G20657	AT1G20657	0.0852755	0.327577	0.385766	0.453178	0.144185		0.242301	0.30049	0.367903	0.0589097
AT2G13900	AT2G13900	0.0246166	0.308535	0.305501	0.32384	0.232777		0.283918	0.280885	0.299223	0.20816
AT1G52800	AT1G52800	0.101413	0.339041	0.37823	1.08574	1.59061		0.237628	0.276817	0.984326	1.4892
AT2G25820	ERF042	0	0.560619	0.257884	0.586626	0.223834		0.560619	0.257884	0.586626	0.223834
AT4G08620	SULTR1	0.178327	0.991272	0.431658	1.53852	3.53633		0.812945	0.253331	1.3602	3.35801
AT2G39490	AT2G39490	0.0176863	0.139968	0.269144	0.154691	0.611699		0.122281	0.251457	0.137005	0.594012
AT1G06170	BHLH89	0.0142601	0.178202	0.262381	0.21312	0.28627		0.163942	0.248121	0.19886	0.27201
AT2G42440	LBD17	0.0255628	0.558634	0.266181	0.247752	0.703251		0.533072	0.240618	0.222189	0.677689
AT5G60780	NRT2.3	0.104465	1.1639	0.329055	0.547653	1.13305		1.05944	0.22459	0.443188	1.02859
AT5G20440	MOB2A	0	0.168617	0.222197	0.273207	0		0.168617	0.222197	0.273207	0
AT5G60480	AtHB26	0	0.457036	0.215595	0.656179	0.0568119		0.457036	0.215595	0.656179	0.0568119
AT1G52120	JAL12	0	0.260035	0.208869	0.0531911	1.70097		0.260035	0.208869	0.0531911	1.70097
AT2G01810	AT2G01810	0.112922	0.412912	0.283961	0.32861	0.302542		0.29999	0.171039	0.215688	0.18962
AT3G62380	AT3G62380	0.0687987	0.38167	0.239547	0.445115	0.0702611		0.312871	0.170748	0.376316	0.00146234
AT5G40800	AT5G40800	0.0620162	1.39676	0.231337	0.940672	0.871606		1.33475	0.16932	0.878656	0.80959
AT3G15310	AT3G15310	0	0.112872	0.166823	0.340281	0		0.112872	0.166823	0.340281	0
AT2G19500	CKX2	0.0164773	0.153402	0.179797	0.151451	0.280103		0.136924	0.163319	0.134974	0.263625
AT5G55770	AT5G55770	0.02162	0.33961	0.172566	0.447951	0.318877		0.31799	0.150946	0.426331	0.297257
AT1G09350	GOLS3	0	0.193237	0.140217	0.94892	0.533075		0.193237	0.140217	0.94892	0.533075
AT5G61090	AT5G61090	0	0.094664	0.078404	0.310875	0.0571041		0.094664	0.078404	0.310875	0.0571041
AT3G19940	STP10	0	0.286195	0.0747255	0.106806	0		0.286195	0.0747255	0.106806	0

## Sheet: transcriptional factors
			log2(TPM+1)						log2((TPM_mutant+1)/(TPM_WT+1))
TF family	name	ID	WT	val1 val2-ne	val1 val2-e	val1 val2 fus3	fus3		val1 val2-ne	val1 val2-e	val1 val2 fus3	fus3
LBD	LBD40	AT1G67100	0	4.15933	7.53878	1.76606	0.985711		4.15933	7.53878	1.76606	0.985711
B3	FUS3	AT3G26790	0.0576527	2.89123	6.94155	0.0396976	0.0281212		2.83358	6.88389	-0.0179551	-0.0295315
B3	ABI3	AT3G24650	0.0168628	3.4475	6.63188	0.318337	0.00943795		3.43064	6.61502	0.301474	-0.00742488
C3H	PEI1	AT5G07500	0.0887802	3.19715	6.68769	1.83151	0.211792		3.10837	6.59891	1.74273	0.123012
MYB	MYB62	AT1G68320	0.221776	3.08126	6.08837	1.82052	1.77329		2.85949	5.86659	1.59875	1.55151
AP2	AIL5	AT5G57390	1.40971	4.03254	6.98362	3.1223	1.77457		2.62283	5.5739	1.71259	0.364861
B3	REM2	AT4G31615	0.310817	2.94577	5.61479	2.37033	0.465828		2.63495	5.30398	2.05952	0.155011
ERF	ERF071	AT2G47520	0.320686	2.83212	5.57974	1.73361	2.29336		2.51143	5.25905	1.41293	1.97267
WOX	WOX12	AT5G17810	0.30173	1.8595	5.54844	1.39788	0.729686		1.55777	5.24671	1.09615	0.427955
LBD	LBD42	AT1G68510	0.0248081	1.81703	5.12237	0.693405	0.289932		1.79222	5.09756	0.668597	0.265124
B3	AT5G25470	AT5G25470	0.249408	2.90145	5.26899	1.78126	0.418009		2.65205	5.01959	1.53185	0.168601
AP2	AIL1	AT1G72570	0	0.975674	4.58456	0.181571	0		0.975674	4.58456	0.181571	0
AP2	AIL7	AT5G65510	0.377532	1.87084	4.94877	0.988398	1.30122		1.49331	4.57124	0.610867	0.923692
MIKC_MADS	AGL15	AT5G13790	2.35312	4.83992	6.82048	5.08068	2.38982		2.4868	4.46736	2.72755	0.036698
MIKC_MADS	FLC	AT5G10140	2.8343	5.99029	7.28325	4.92969	2.31458		3.15598	4.44895	2.09538	-0.519727
MIKC_MADS	MAF5	AT5G65080	0.841009	5.61922	5.28248	5.51761	1.1159		4.77821	4.44147	4.6766	0.274893
WOX	WOX11	AT3G03660	0.129295	2.47977	4.55112	1.1358	1.367		2.35048	4.42182	1.00651	1.2377
NAC	anac044	AT3G01600	0.552613	3.32293	4.95475	2.93167	0.895494		2.77032	4.40214	2.37905	0.342881
WOX	WOX5	AT3G11260	0.829443	3.55929	5.16819	2.98088	1.54453		2.72984	4.33875	2.15144	0.715087
G2-like	AT2G42660	AT2G42660	1.0859	2.96027	5.16947	2.45801	2.33953		1.87437	4.08357	1.37211	1.25363
bHLH	BHLH113	AT3G19500	0.61322	2.04137	4.46722	1.46575	1.11886		1.42815	3.854	0.852531	0.505643
Trihelix	AT3G10040	AT3G10040	1.50282	2.46632	5.22248	2.852	4.04081		0.963498	3.71966	1.34918	2.53799
GeBP	AT5G41765	AT5G41765	0.130825	2.2758	3.83597	2.84309	0.726373		2.14497	3.70515	2.71227	0.595547
ERF	DREB2G	AT5G18450	0.0321455	1.30987	3.69508	0.207276	0.00993808		1.27772	3.66293	0.17513	-0.0222074
NAC	ANAC104	AT5G64530	0.633056	2.44425	4.26646	2.00483	1.80066		1.81119	3.6334	1.37178	1.16761
WOX	WOX2	AT5G59340	1.28064	2.67955	4.83474	2.82345	0.661015		1.39892	3.55411	1.54281	-0.619623
ERF	ERF114	AT5G61890	0.344173	1.93788	3.85904	0.901	0.46781		1.5937	3.51486	0.556828	0.123637
bHLH	PRE1	AT5G39860	0.423106	2.52059	3.92247	2.89832	1.69689		2.09749	3.49936	2.47522	1.27378
ZF-HD	ZHD7	AT3G50890	1.01405	2.85855	4.492	2.51128	1.88616		1.8445	3.47794	1.49723	0.872109
ERF	DREB2E	AT2G38340	0.204102	1.7409	3.61548	0.968183	1.17236		1.5368	3.41138	0.764081	0.968259
ZF-HD	ZHD13	AT5G42780	2.17232	3.9227	5.3578	3.35777	2.50165		1.75038	3.18548	1.18545	0.329327
TALE	BLH8	AT2G27990	1.02953	2.08163	3.91608	2.0142	1.25658		1.0521	2.88655	0.98467	0.227056
MYB	ATMYB58	AT1G16490	0.959381	1.99984	3.7785	1.90671	2.08408		1.04046	2.81911	0.947332	1.1247
C3H	AT5G44260	AT5G44260	1.87586	3.46091	4.67295	3.8288	3.70435		1.58505	2.79709	1.95293	1.82848
bHLH	BHLH93	AT5G65640	3.79751	5.73936	6.56474	6.06827	6.02522		1.94185	2.76724	2.27076	2.22771
ERF	ERF023	AT1G01250	0.772173	1.77705	3.52637	1.59671	0.889952		1.00488	2.7542	0.824532	0.117779
NF-YA	NFYA5	AT1G54160	1.70525	3.84943	4.44851	3.502	3.27403		2.14418	2.74326	1.79675	1.56878
bHLH	PRE5	AT3G28857	0.107719	1.81366	2.8438	0.679067	0.386393		1.70595	2.73608	0.571348	0.278674
C2H2	JKD	AT5G03150	2.09115	4.17919	4.7476	3.51759	3.60802		2.08804	2.65645	1.42644	1.51687
MIKC_MADS	MAF4	AT5G65070	1.46406	3.42042	4.10936	3.7507	1.13957		1.95636	2.6453	2.28664	-0.324488
ERF	ERF9	AT5G44210	1.1558	2.42888	3.74413	2.33205	1.77382		1.27308	2.58833	1.17625	0.618027
MYB	ATMYB14	AT2G31180	0.359984	1.72007	2.92767	2.23802	2.00032		1.36009	2.56769	1.87804	1.64034
NAC	JUB1	AT2G43000	0.87015	2.56164	3.36235	1.9091	2.84769		1.69149	2.4922	1.03895	1.97754
HD-ZIP	ATHB-4	AT2G44910	0.729534	2.2676	3.20323	2.23683	1.68167		1.53807	2.4737	1.5073	0.952137
bZIP	AtbZIP3	AT5G15830	1.28904	3.30245	3.68563	3.52649	3.95487		2.01341	2.39659	2.23745	2.66582
WOX	WOX3	AT2G28610	0.141635	0.750661	2.53322	0.437669	0.130383		0.609027	2.39159	0.296034	-0.0112515
MYB	MYB4	AT4G38620	2.65778	4.56258	5.04444	4.67525	4.97217		1.90481	2.38666	2.01747	2.31439
LBD	LBD15	AT2G40470	0.828798	1.80484	3.20682	1.92616	1.74241		0.976044	2.37802	1.09736	0.913612
bHLH	AT2G31730	AT2G31730	2.75284	4.35714	5.11823	4.21985	3.78666		1.60431	2.36539	1.46701	1.03382
NF-YA	NFYA3	AT1G72830	2.83842	4.89473	5.19415	4.222	4.95107		2.05631	2.35573	1.38358	2.11265
HD-ZIP	HAT2	AT5G47370	3.26899	6.32772	5.624	6.23771	5.75563		3.05873	2.35501	2.96872	2.48664
bHLH	BHLH51	AT2G40200	0.399625	1.59957	2.70949	1.61027	1.73589		1.19995	2.30986	1.21064	1.33626
B3	AT5G06250	AT5G06250	0.240541	0.973379	2.48669	0.639752	1.57913		0.732838	2.24614	0.399211	1.33859
GATA	GATA9	AT4G32890	2.22044	3.49193	4.45568	3.83311	3.56452		1.27149	2.23523	1.61267	1.34408
MYB	MYB111	AT5G49330	0.554373	2.1238	2.7691	2.09317	2.16961		1.56943	2.21472	1.5388	1.61524
LBD	LBD4	AT1G31320	1.39712	3.84427	3.58484	3.33684	3.3611		2.44716	2.18772	1.93972	1.96398
HSF	HSFB4	AT1G46264	3.03248	4.37225	5.20991	4.34437	4.0676		1.33977	2.17743	1.31189	1.03512
NF-YA	NFYA6	AT3G14020	2.70559	4.65179	4.87377	4.09276	4.42429		1.9462	2.16819	1.38718	1.71871
ERF	WIND3	AT1G36060	3.27936	4.59285	5.43621	5.15261	4.83068		1.31349	2.15684	1.87325	1.55132
NF-YA	NFYA2	AT3G05690	2.11001	4.92494	4.23245	3.8933	5.31073		2.81494	2.12244	1.78329	3.20072
C2H2	AT1G26590	AT1G26590	0.199866	1.73655	2.30148	1.66107	0.568067		1.53668	2.10161	1.4612	0.368201
TALE	KNAT2	AT1G70510	0.945801	2.20631	2.97701	1.87329	1.82715		1.26051	2.03121	0.927491	0.881352
B3	REM3	AT4G31620	1.00336	1.95664	3.0168	2.32675	2.10851		0.953284	2.01344	1.32339	1.10516
WOX	WOX4	AT1G46480	1.5479	3.44401	3.52141	3.16584	2.73031		1.89611	1.97351	1.61795	1.18241
bHLH	BHLH71	AT5G46690	2.7327	4.57969	4.67509	4.12696	4.23249		1.847	1.9424	1.39427	1.49979
Trihelix	AT5G28300	AT5G28300	3.56842	5.50799	5.40799	5.40059	5.10021		1.93957	1.83958	1.83217	1.53179
MYB	AtMYB45	AT3G48920	0.927113	3.40175	2.76291	2.17882	2.97094		2.47464	1.8358	1.2517	2.04383
LBD	LBD25	AT3G27650	1.70311	3.82468	3.50699	3.53347	3.61126		2.12157	1.80389	1.83036	1.90816
bHLH	PRE6	AT1G26945	3.08876	5.15251	4.8778	4.52466	3.44749		2.06375	1.78904	1.4359	0.35873
ERF	RAP2-9	AT4G06746	2.08226	4.03234	3.86374	3.5375	4.12282		1.95008	1.78148	1.45524	2.04056
MYB	AtMYB56	AT5G17800	0.780894	2.52915	2.55898	2.28811	2.3326		1.74825	1.77809	1.50721	1.5517
bHLH	BPE	AT1G59640	1.79046	2.87777	3.43995	3.12219	2.64426		1.0873	1.64948	1.33173	0.853801
MYB	MYB101	AT2G32460	0.0664502	0.371919	1.68746	0.339861	0.13688		0.305468	1.62101	0.273411	0.0704298
C3H	AT4G29190	AT4G29190	3.67128	6.3307	5.27267	6.29986	6.82775		2.65942	1.60139	2.62858	3.15647
bHLH	PRE2	AT5G15160	1.65377	4.01652	3.17992	3.19922	2.6539		2.36276	1.52615	1.54545	1.00013
bHLH	BEE1	AT1G18400	1.46066	2.9476	2.945	3.71566	2.89248		1.48694	1.48434	2.255	1.43183
bHLH	BEE3	AT1G73830	0.723254	3.0009	2.18688	2.78987	3.35071		2.27765	1.46363	2.06661	2.62746
MYB	ATMYB11	AT3G62610	0	0.533387	1.43738	0.255491	0.0296399		0.533387	1.43738	0.255491	0.0296399
MIKC_MADS	AGL1	AT3G58780	0.462888	1.69879	1.87882	1.07988	1.19128		1.23591	1.41593	0.616996	0.728388
G2-like	AT3G25790	AT3G25790	1.72247	3.04599	3.12755	3.29478	3.64285		1.32352	1.40509	1.57231	1.92038
Dof	CDF3	AT3G47500	1.44322	2.73278	2.83343	3.23579	3.17394		1.28956	1.39022	1.79257	1.73073
B3	AT5G66980	AT5G66980	0	0.624575	1.37638	1.12895	0.083861		0.624575	1.37638	1.12895	0.083861
NAC	anac074	AT4G28530	0.429577	1.31804	1.80581	1.85919	2.34121		0.888458	1.37623	1.42961	1.91163
G2-like	AT5G45580	AT5G45580	0.670332	2.01796	2.00668	2.23702	2.68158		1.34763	1.33635	1.56669	2.01125
C2H2	ZAT5	AT2G28200	1.90972	3.71734	3.24407	3.98939	4.55927		1.80762	1.33435	2.07967	2.64955
C3H	AT2G19810	AT2G19810	4.00076	6.42239	5.30585	5.61138	5.08904		2.42163	1.30509	1.61063	1.08828
bZIP	AtbZIP	AT1G68880	1.07089	2.94714	2.36146	2.98226	3.07145		1.87625	1.29057	1.91137	2.00055
MYB	ATMYB63	AT1G79180	0.846751	1.86789	2.13622	2.29612	2.68814		1.02114	1.28947	1.44937	1.84139
bZIP	BZIP61	AT3G58120	3.83375	5.32313	5.08293	6.05652	5.43345		1.48938	1.24918	2.22277	1.59971
GATA	GATA7	AT4G36240	1.57734	2.94243	2.80293	2.75133	2.86235		1.3651	1.2256	1.174	1.28502
G2-like	KAN3	AT4G17695	2.05079	3.62313	3.25659	3.36744	2.58264		1.57234	1.2058	1.31665	0.531845
bHLH	BHLH99	AT5G65320	0.273912	1.63067	1.43136	1.45059	1.5625		1.35676	1.15744	1.17668	1.28859
MYB	MYB3	AT1G22640	3.46772	5.17316	4.57307	5.15905	5.14135		1.70544	1.10535	1.69133	1.67364
MYB	AtMYB27	AT3G53200	0.331267	1.15239	1.40991	0.868564	1.16474		0.821126	1.07865	0.537297	0.833478
TALE	ATH1	AT4G32980	3.05317	4.55374	4.12575	4.454	2.98705		1.50057	1.07258	1.40083	-0.0661237
ZF-HD	MIF3	AT1G18835	0.589252	2.11825	1.65256	1.70409	1.9613		1.52899	1.06331	1.11483	1.37205
NAC	anac047	AT3G04070	2.76685	3.99756	3.77992	4.59728	4.7081		1.23071	1.01308	1.83044	1.94125
bHLH	HEC2	AT3G50330	0	0.400275	1.00851	0.213092	0.0681631		0.400275	1.00851	0.213092	0.0681631
NAC	anac058	AT3G18400	1.41818	2.95556	2.40981	3.22855	3.11039		1.53739	0.991633	1.81037	1.69222
NAC	NAC031	AT1G76420	0.18031	0.757685	1.16933	0.61274	0.647954		0.577375	0.989015	0.43243	0.467643
GATA	GATA23	AT5G26930	0.0490001	0.303699	0.931092	0.597504	0.506872		0.254699	0.882092	0.548503	0.457872
SBP	SPL9	AT2G42200	0.922546	2.37325	1.791	2.11209	1.87633		1.4507	0.868454	1.18955	0.95378
MYB_related	AT5G56840	AT5G56840	0.771643	2.44394	1.60223	3.23382	3.34693		1.6723	0.830584	2.46218	2.57529
bHLH	TT8	AT4G09820	0.0639686	0.658705	0.885711	0.615316	0.376057		0.594736	0.821743	0.551348	0.312088
NF-YA	NFYA10	AT5G06510	0.590312	1.68674	1.38452	1.3016	2.98447		1.09643	0.794208	0.711284	2.39416
HD-ZIP	HDG4	AT4G17710	0.0266641	0.72465	0.77615	0.667535	0.317819		0.697986	0.749486	0.640871	0.291155
ERF	ERF15	AT2G31230	0.873752	2.68692	1.61644	2.69776	4.13843		1.81317	0.742684	1.82401	3.26468
MYB	MYB90	AT1G66390	0	0.167593	0.705817	1.24559	0.302611		0.167593	0.705817	1.24559	0.302611
bHLH	BHLH23	AT4G28790	0.222	0.647833	0.827461	0.621524	1.13437		0.425832	0.605461	0.399523	0.912365
MYB	MYB78	AT5G49620	0.377974	0.848566	0.945453	1.04591	1.9562		0.470592	0.567479	0.667936	1.57822
MYB	MYB122	AT1G74080	0.470434	1.19942	0.935063	1.69511	1.22345		0.728984	0.464628	1.22468	0.753015
C2H2	GIS	AT3G58070	0.404477	1.51649	0.848933	1.80598	1.09575		1.11202	0.444456	1.4015	0.69127
M-type_MADS	AT1G17310	AT1G17310	0.30523	0.983298	0.723116	1.39007	0.951854		0.678068	0.417886	1.08484	0.646623
C2H2	ZFP1	AT1G80730	0.357348	1.83475	0.769877	0.894418	0.516131		1.4774	0.412529	0.53707	0.158783
MYB_related	TRP5	AT1G07540	0	0.287219	0.339628	0.142719	0		0.287219	0.339628	0.142719	0
ERF	ERF042	AT2G25820	0	0.560619	0.257884	0.586626	0.223834		0.560619	0.257884	0.586626	0.223834
bHLH	BHLH89	AT1G06170	0.0142601	0.178202	0.262381	0.21312	0.28627		0.163942	0.248121	0.19886	0.27201
LBD	LBD17	AT2G42440	0.0255628	0.558634	0.266181	0.247752	0.703251		0.533072	0.240618	0.222189	0.677689
ZF-HD	AtHB26	AT5G60480	0	0.457036	0.215595	0.656179	0.0568119		0.457036	0.215595	0.656179	0.0568119
