# Supplementary material for: A FUS3-VAL transcriptional negative feedback circuit terminates seed maturation program and safeguards vegetative development
Source: Research Square preprint supplement (doi:10.21203/rs.3.rs-7986565/v1), 2025-11-12
Supplement: Supplementary file 6 [file 992f53889af16b6df0cea288.xlsx]

## Sheet: primer
Genetyping	LBb1.3	ATTTTGCCGATTTCGGAAC
	val1-LP	CCTCTTTCCAAAGACAGGAGG
	val1-RP	GTCGCATTGGTCGTCTAGTTC
	val2-LP	TACAGTCCATGCAGTTGCAAG
	val2-RP	ACATGCAACCTCGTTTACCTG
	agl15-3-LP	GTTTTCCAACTCTGCTCGTTG
	agl15-3-RP	GATCGAGAATGCGAATAGCAG
	fus3-3-LP	TCTCCGACGTATGATACTCCCG
	fus3-3-RP	ATAATACCCAGCTCGATCCAAT
pEG301-35S:FUS3-GR-3FLAG	35S-F	aaaaatctcagaattgaattcGGCCAACGCGCGGGGAGA
	35S-R	CACATTTTCATCAACCATCATTCAGCGTGTCCTCTCCAAATG
	FUS3-F	CATTTGGAGAGGACACGCTGAATGATGGTTGATGAAAATGTGGAA
	FUS3-R	ctccGTAGAAGTCATCGAGAGAGATATTCTCAA
	GR-F	tctcgatgacttctacGGAGGGGGTGGTTCAGGG
	GR-R	gacagtactatcgatggatccTTTTTGATGAAACAGAAGCTTTTTG
pEG301-FUS3p:gFUS3-3FLAG-GFP	mcs-gFUS3-F	tggcgcgccactagtggatccATATTGAGTTTATATTAGGGCCTGAGAT
	mcs-gFUS3-R	gacagtactatcgatggatccAGTAGAAGTCATCGAGAGAGATATTCTCA
BD-MEA-N construct	attB1-MEA-N-F	GGGGACAAGTTTGTACAAAAAAGCAGGCTTCATGGAGAAGGAAAACCATGAGG
	attB2-MEA-N-R	GGGGACCACTTTGTACAAGAAAGCTGGGTCTGGATCTGAGACCACAATC
pMDC7-VAL1 construct	attB1-VAL1-F	GGGGACAAGTTTGTACAAAAAAGCAGGCTTCATGTTTGAAGTCAAAATGGGGTC
	attB1-VAL1-R	GGGGACCACTTTGTACAAGAAAGCTGGGTCGCTTGAAACTCTCGGCTCTTCAC
MEA-nLuc	mcs-MEA-F	tggcgcgccactagtggatccATGGAGAAGGAAAACCATGAGGA
	mcs-MEA-R	gacagtactatcgatggatccACGAGCTGGACGGGCTTC
VAL1-cLuc	mcs-VAL1-F	tggcgcgccactagtggatccATGTTTGAAGTCAAAATGGGGTCA
	mcs-VAL1-R	gacagtactatcgatggatccGCTTGAAACTCTCGGCTCTTCA
VAL2-cLuc	mcs-VAL2-F	tggcgcgccactagtggatccATGGAGTCAATAAAGGTTTGCATG
	mcs-VAL2-R	gacagtactatcgatggatccGTTCACAGGATCATGAGCTCCAT
Yeast One-Hybrid (Y1H) Assays	B42AD-VAL1-F	gattatgcctctcccgaattcATGTTTGAAGTCAAAATGGGGTC
	B42AD-VAL1-R	cttctcgagtcggccgaattcTCAGCTTGAAACTCTCGGCTCT
	B42AD-VAL2-F	gattatgcctctcccgaattcATGGAGTCAATAAAGGTTTGCATG
	B42AD-VAL2-R	cttctcgagtcggccgaattcTTAGTTCACAGGATCATGAGCTC
	FUS3p-3xRY1-F	aattctcaccatgcacaattcaccatgcacaattcaccatgcacaatc
	FUS3p-3xRY1-R	tcgagattgtgcatggtgaattgtgcatggtgaattgtgcatggtgag
	FUS3p-3xRY2-F	aattctgtccatgcaaagatgtccatgcaaagatgtccatgcaaagac
	FUS3p-3xRY2-R	tcgagtctttgcatggacatctttgcatggacatctttgcatggacag
Prokaryotic Expression of Recombinant Proteins	pGEX-4T-1-MEA-N-F	ccgcgtggatccccggaattcATGGAGAAGGAAAACCATGAGGA
	pGEX-4T-1-MEA-N-R	ctcgagtcgacccgggaattcAAGCCCCCGAAGTATGTTTAATG
	pGEX-4T-1-B3VAL1-F	ccgcgtggatccccggaattcCCATCAAGACCTGCTATTTCAACTC
	pGEX-4T-1-B3VAL1-R	ctcgagtcgacccgggaattcCTTCTTCTCTTTAACTCGTGTAGGATCA
	pGEX-4T-1-B3VAL2-F	ccgcgtggatccccggaattcGCTGCTGTTGATGACAGAAGTAAGA
	pGEX-4T-1-B3VAL2-R	ctcgagtcgacccgggaattcGGACGACTGAAGAAATAAGTTATCCTT
	pMal-MBP-6xHis-B3VAL1-F	cgcgatatcgtcgacggatccCCATCAAGACCTGCTATTTCA
	pMal-MBP-6xHis-B3VAL1-R	gtggtgatgatgatgggatccCTTCTTCTCTTTAACTCGTGTAG
	pMal-MBP-6xHis-B3VAL2-F	cgcgatatcgtcgacggatccGCTGCTGTTGATGACAGAAG
	pMal-MBP-6xHis-B3VAL2-R	gtggtgatgatgatgggatccGGACGACTGAAGAAATAAGTTATCC
	pMal-MBP-6xHis-VAL1-F	cgcgatatcgtcgacggatccATGTTTGAAGTCAAAATGG
	pMal-MBP-6xHis-VAL1-R	gtggtgatgatgatgggatccGCTTGAAACTCTCGGCTC
	pMal-MBP-6xHis-VAL2-F	cgcgatatcgtcgacggatccATGGAGTCAATAAAGGTTT
	pMal-MBP-6xHis-VAL2-R	gtggtgatgatgatgggatccGTTCACAGGATCATGAGC
PCR fragment for DAP-qPCR	DAP-FUS3p-fragment-RY2-F	CGAAAACTCATTAGTCATTA
	DAP-FUS3p-fragment-RY2-R	TAGATGCATACTCTTAGAAA
	DAP-FUS3p-fragment-RY1-F	AAGTCAAGTAATCTCAAAGGTA
	DAP-FUS3p-fragment-RY1-R	GATGATAGTAACGCAACAAG
	DAP-UBC21-fragment-F	TGTAATAGGCATCAAGAGCG
	DAP-UBC21-fragment-R	ACAGACTGAAGCGTCCAAGC
qRT-PCR primers	qPCR-pFUS3-RY1-F	TTGTTCACCATGCACAATCCAC
	qPCR-pFUS3-RY1-R	ACGCAACAAGATCTAATGCCAC
	qPCR-pFUS3-RY2-F	AGAGAATAGTTGCCACTTGTCCA
	qPCR-pFUS3-RY2-R	TGGGTGAGGAAGAATACGTGAC
	qPCR-UBC21-F	TGGACCGCTCTTATCAAAGGAC
	qPCR-UBC21-R	CGAACTTGAGGAGGTTGCAAAG
	qRT-LEC1-F	GTGGTTCTGCACTTAGAGGTGA
	qRT-LEC1-R	CATAACCATAAGGACCCGGAGG
	qRT-LEC2-F	AATGAGTCGAGGGAAAGGAACC
	qRT-LEC2-R	CCATGAGATCGTTAGGGATGGG
	qRT-FUS3-F	GGCCTCTACTTTAGTGGCAAGT
	qRT-FUS3-R	CGTCTCTGTCTAGGCATCCTTC
	qRT-ABI3-F	CTTCCTTGGAACAGGACGATGA
	qRT-ABI3-R	CTTGCCGCTGATTCAATCGTAG
	qRT-VAL2-F	TTCATGTTCCGCACCTGATGA
	qRT-VAL2-R	TTTTGAACTCTTTGCTCTGCCG
	qPCR-VAL1-F	ACCCACCCTCCATAAATGGTTC
	qPCR-VAL1-R	TTTGCACCAATGGTTCGAGTTC
	qPCR-2S1-F	ATGCCGCAAGGAGTTTCAGA
	qPCR-2S1-R	CAAACTCATCGCTACGGCCT
	qPCR-OLEO1-F	ACCTCTGCTCGTTATCTTC
	qPCR-OLEO1-R	GCTTCCCAACTTCATCC
	qPCR-CRA1-F	CTCCGTTGCTCAGGTGTCT
	qPCR-CRA1-R	ACCGCTCCTAATGTGCTCC

## Sheet: gene ID
ID	name
AT1G21970	LEC1
AT1G28300	LEC2
AT3G26790	FUS3
AT3G24650	ABI3
AT5G13790	AGL15
AT4G27140	2S1
AT4G27150	2S2
AT4G27160	2S3
AT4G27170	2S4
AT5G07190	ATS3
AT5G54740	SESA5
AT2G40220	ABI4
AT4G25140	OLEO1
AT5G40420	OLEO2
AT5G51210	OLEO3
AT3G27660	OLEO4
AT5G44120	CRA1
AT1G03880	CRB
AT4G28520	CRC
AT1G03890	CRD
AT5G06760	LEA4-5
AT2G21490	LEA
AT2G35300	LEA18
AT5G17430	BBM
AT3G51810	EM1
AT5G07500	PEI1
AT5G10140	FLC
AT1G18100	MFT
AT2G34870	MEE26
AT3G44460	DPBF2
AT2G41070	DPBF4
AT1G03790	SOM
AT5G45830	DOG1
AT5G51760	AHG1
AT4G26740	PXG1
AT5G55240	PXG2
AT1G48130	PER1
AT5G11320	YUC4
AT5G59340	WOX2
AT2G28610	WOX3
AT3G21720	ICL
