# Supplementary material for: A FUS3-VAL transcriptional negative feedback circuit terminates seed maturation program and safeguards vegetative development
Source: Research Square preprint supplement (doi:10.21203/rs.3.rs-7986565/v1), 2025-11-12
Supplement: Supplementary file 7 [file a8d887e41817a2c65b8a4fec.xlsx]

## Sheet: FUS3-GR-FLAG_up_TF
family	name		log2(FUS3-GR-FLAG_DEX/DMSO)	FDR
ERF	ERF017	AT1G19210	6.18392	9.01e-47
ERF	ABI4	AT2G40220	5.89969	1.12e-22
ERF	ERF114	AT5G61890	3.47576	3.6e-55
ERF	DREB1F	AT1G12610	3.47349	3.34e-26
ERF	DREB2E	AT2G38340	3.18644	5.66e-27
ERF	ERF019	AT1G22810	2.9733	6.25e-07
ERF	ERF115	AT5G07310	2.92919	6e-14
ERF	ERF084	AT1G80580	2.86728	0.000119222
ERF	ERF071	AT2G47520	2.80769	7.53e-216
ERF	ERF113	AT5G13330	2.75103	1.22e-173
ERF	ERF13	AT2G44840	2.74733	1.5e-157
ERF	DREB2G	AT5G18450	2.63656	0.000495776
ERF	ERF013	AT1G77640	2.58291	1.04e-78
ERF	ERF11	AT1G28370	2.54985	2.8e-167
ERF	ABR1	AT5G64750	2.43281	1.31e-12
ERF	DREB1E	AT1G63030	2.40597	0.00162738
ERF	ERF1B	AT3G23240	2.29115	3.71e-42
ERF	DREB1B	AT4G25490	2.29003	2.1e-08
ERF	ERF016	AT5G21960	2.14097	2.71e-19
ERF	ERF109	AT4G34410	2.13375	1.95e-92
ERF	ERF105	AT5G51190	2.11401	1.7e-271
ERF	ERF014	AT1G44830	2.11061	8.77e-31
ERF	DREB1C	AT4G25470	2.08224	1.5e-20
ERF	ERF088	AT1G12890	1.99635	0.00144455
ERF	ERF020	AT1G71520	1.86626	9.25e-05
ERF	ERF003	AT5G25190	1.76892	1.97e-75
ERF	ERF4	AT3G15210	1.68784	6.82e-290
ERF	ERF055	AT1G36060	1.61131	4.51e-122
ERF	ERF011	AT3G50260	1.5653	2.28e-47
ERF	ERF022	AT1G33760	1.5146	3.28e-10
ERF	CRF3	AT5G53290	1.2585	9.83e-23
ERF	ERF043	AT4G32800	1.15612	5.77e-21
ERF	ERF12	AT1G28360	1.07051	0.000298305
WRKY	WRKY46	AT2G46400	4.54835	0
WRKY	WRKY75	AT5G13080	4.07091	1.57e-218
WRKY	WRKY38	AT5G22570	3.86127	1.04e-78
WRKY	WRKY51	AT5G64810	3.42464	9.18e-72
WRKY	WRKY63	AT1G66600	3.34192	2.38e-23
WRKY	WRKY62	AT5G01900	3.20649	3.46e-09
WRKY	WRKY34	AT4G26440	2.91243	1.16e-05
WRKY	WRKY8	AT5G46350	2.7362	1.94e-38
WRKY	WRKY40	AT1G80840	2.71186	0
WRKY	WRKY66	AT1G80590	2.47632	0.00115119
WRKY	WRKY48	AT5G49520	2.39086	3.98e-143
WRKY	WRKY72	AT5G15130	2.00355	1.59e-64
WRKY	WRKY30	AT5G24110	1.85193	1.83e-06
WRKY	WRKY53	AT4G23810	1.39387	2.92e-36
WRKY	WRKY45	AT3G01970	1.37464	1.66e-49
WRKY	WRKY23	AT2G47260	1.36646	3.19e-24
WRKY	WRKY25	AT2G30250	1.35484	1.76e-94
WRKY	WRKY60	AT2G25000	1.20743	7.13e-18
WRKY	WRKY18	AT4G31800	1.14987	6.6e-124
WRKY	WRKY28	AT4G18170	1.14027	8.09e-09
NAC	NAC054	AT3G15170	4.27925	1.55e-24
NAC	NAC025	AT1G61110	3.35367	1.17e-07
NAC	ANAC104	AT5G64530	3.29464	8.39e-70
NAC	NAC066	AT3G61910	3.26966	1.39e-10
NAC	NAC019	AT1G52890	2.91333	6.22e-217
NAC	NAC043	AT2G46770	2.90452	9.44e-11
NAC	NAC004	AT1G02230	2.89696	6.7e-19
NAC	JUB1	AT2G43000	2.72478	1.28e-43
NAC	anac074	AT4G28530	2.50111	9.25e-24
NAC	ANAC087	AT5G18270	2.47033	2.95e-240
NAC	NAC061	AT3G44350	2.28322	4.84e-05
NAC	anac071	AT4G17980	2.13863	1.96e-07
NAC	anac099	AT5G56620	1.93765	8.66e-09
NAC	NAC003	AT1G02220	1.92928	7.83e-134
NAC	NAC60	AT3G44290	1.9098	4.22e-06
NAC	AT3G12910	AT3G12910	1.65359	0.0334023
NAC	NAC098	AT5G53950	1.49767	0.000295402
NAC	ATNAC2	AT3G15510	1.47312	9.53e-63
NAC	NAC062	AT3G49530	1.4303	1.88e-134
NAC	NAC002	AT1G01720	1.38258	2.54e-116
NAC	NAC029	AT1G69490	1.372	2.85e-28
NAC	ANAC091	AT5G24590	1.3468	3.2e-141
NAC	NAC021	AT1G56010	1.34249	4.66e-78
NAC	NAC081	AT5G08790	1.02272	2.58e-142
AP2	AIL1	AT1G72570	9.25631	3.94e-78
AP2	AIL7	AT5G65510	2.77963	1.98e-94
AP2	AIL5	AT5G57390	2.60673	3.84e-83
AP2	BBM	AT5G17430	2.10309	5.28e-20
AP2	WRI1	AT3G54320	1.61203	6.39e-67
AP2	AIL6	AT5G10510	1.23519	6.06e-37
Trihelix	GT-3A	AT5G01380	3.86516	6.87e-83
Trihelix	GT-3B	AT2G38250	3.23604	6.97e-145
Trihelix	AT3G10040	AT3G10040	1.50915	1.08e-192
Trihelix	AT5G28300	AT5G28300	1.40122	7.85e-98
Trihelix	EDA31	AT3G10000	1.36235	0.000897408
WOX	WOX12	AT5G17810	5.47913	1.69e-286
WOX	WOX5	AT3G11260	3.63925	2.07e-19
WOX	WOX3	AT2G28610	3.52123	2.79e-18
HD-ZIP	HDG3	AT2G32370	3.64245	3.69e-07
HD-ZIP	ATHB-53	AT5G66700	2.39801	1.88e-14
HD-ZIP	ATHB-4	AT2G44910	1.75275	1.32e-08
HD-ZIP	ATHB-7	AT2G46680	1.63431	2.95e-85
HD-ZIP	ATHB-40	AT4G36740	1.59424	3.94e-05
HD-ZIP	HAT4	AT4G16780	1.3758	2.55e-30
HD-ZIP	ATHB-17	AT2G01430	1.01792	4.19e-06
SRS	LRP1	AT5G12330	1.13727	5.16e-28
SRS	SRS7	AT1G19790	1.03187	0.000489018
GRAS	SCL34	AT2G29065	1.36992	1.77e-18
GRAS	RGL1	AT1G66350	1.23486	1.07e-48
GRAS	SCL26	AT4G08250	1.17943	0.0133046
GRAS	SCL9	AT2G37650	1.10463	1.66e-24
GRAS	SCL8	AT5G52510	1.09818	4.03e-56
MIKC_MADS	FLC	AT5G10140	5.66303	3.31e-176
MIKC_MADS	AGL67	AT1G77950	4.07032	2.11e-16
MIKC_MADS	AGL15	AT5G13790	3.02891	1.07e-205
MIKC_MADS	AGL1	AT3G58780	2.95293	4.63e-50
MIKC_MADS	SEP1	AT5G15800	1.18159	0.00700358
MIKC_MADS	ANR1	AT2G14210	1.13686	0.000322169
C3H	PEI1	AT5G07500	6.16362	6.53e-169
C3H	SOM	AT1G03790	4.29107	5.95e-29
C3H	CZF1	AT2G40140	1.61005	0
C3H	AT1G04990	AT1G04990	1.44989	3.73e-165
C3H	ZFN2	AT2G32930	1.40328	1.78e-42
C3H	SZF1	AT3G55980	1.19817	1.48e-170
C3H	AT5G58620	AT5G58620	1.19638	5.99e-74
LBD	LBD42	AT1G68510	5.76086	2.59e-21
LBD	LBD40	AT1G67100	5.62352	0
LBD	LBD16	AT2G42430	2.72652	4.33e-82
LBD	LBD15	AT2G40470	1.50657	3.29e-12
LBD	LBD12	AT2G30130	1.44143	1.94e-12
LBD	LOB	AT5G63090	1.1631	5.44e-13
NF-YB	LEC1	AT1G21970	5.46972	1.14e-18
NF-YB	NFYB6	AT5G47670	2.19289	0.000369723
ARR-B	ARR21	AT5G07210	3.78927	9.28e-08
ARR-B	APRR2	AT4G18020	1.03429	4.68e-65
B3	REM2	AT4G31615	4.291	1.03e-19
B3	ABI3	AT3G24650	4.03696	6.66e-10
B3	REM7	AT4G31660	4.00964	8.95e-09
B3	AT5G25470	AT5G25470	2.97267	2.49e-42
B3	VAL1	AT2G30470	2.18795	0
B3	FUS3	AT3G26790	1.61566	0
B3	REM16	AT4G33280	1.23907	5.71e-12
B3	ARF32	AT3G11580	1.00887	1.89e-12
C2H2	AT3G46070	AT3G46070	3.85228	4.95e-08
C2H2	ZAT12	AT5G59820	3.22776	0
C2H2	ZAT11	AT2G37430	3.19577	8.07e-56
C2H2	AT1G26590	AT1G26590	2.18031	1.02e-10
C2H2	AZF2	AT3G19580	1.99429	2.61e-98
C2H2	JKD	AT5G03150	1.75635	1.69e-90
C2H2	IDD13	AT5G60470	1.70561	8.48e-06
C2H2	SGR5	AT2G01940	1.6132	8.37e-39
C2H2	ZAT7	AT3G46090	1.28858	1.31e-18
C2H2	ZAT4	AT2G45120	1.28103	5e-10
C2H2	AT3G53600	AT3G53600	1.08932	0.00376633
MYB	MYB15	AT3G23250	5.04632	0
MYB	MYB78	AT5G49620	3.45454	5.85e-33
MYB	MYB112	AT1G48000	3.20719	7.01e-55
MYB	MYB101	AT2G32460	3.11786	1.33e-05
MYB	MYB114	AT1G66380	3.04922	6.3e-10
MYB	MYB113	AT1G66370	2.94038	2.16e-20
MYB	MYB90	AT1G66390	2.78879	4.83e-53
MYB	AtMYB53	AT5G65230	2.68467	1.49e-29
MYB	ATMYB14	AT2G31180	2.23054	3.75e-29
MYB	MYB62	AT1G68320	1.98616	1.5e-10
MYB	MYB111	AT5G49330	1.6739	1e-19
MYB	MYB49	AT5G54230	1.38111	4.89e-17
MYB	MYB94	AT3G47600	1.2141	5.94e-23
MYB	MYB36	AT5G57620	1.15648	3.42e-14
MYB	MYB51	AT1G18570	1.07453	4.46e-45
MYB	RAX2	AT2G36890	1.05098	3.34e-18
bZIP	DPBF2	AT3G44460	9.19999	8.43e-77
bZIP	DPBF4	AT2G41070	2.39128	4.88e-210
bZIP	GBF3	AT2G46270	1.9724	3.52e-97
bZIP	TGA10	AT5G06839	1.87453	8.97e-44
bZIP	BZIP60	AT1G42990	1.59562	4.97e-117
bZIP	TGA7	AT1G77920	1.25432	1.01e-113
bZIP	ABI5	AT2G36270	1.14436	7.06e-09
bZIP	DPBF3	AT3G56850	1.05554	2.26e-59
TALE	BLH8	AT2G27990	1.80127	6.99e-20
TALE	KNAT2	AT1G70510	1.10703	4.9e-05
HSF	HSFA6B	AT3G22830	1.2148	3.72e-06
HSF	HSFA4A	AT4G18880	1.03969	2.77e-35
NF-YC	NFYC2	AT1G56170	1.80101	1.67e-106
bHLH	BHLH19	AT2G22760	4.16233	4.61e-31
bHLH	BHLH92	AT5G43650	4.04335	6.22e-29
bHLH	BHLH18	AT2G22750	3.59354	1.81e-19
bHLH	TT8	AT4G09820	2.83793	7.37e-89
bHLH	BHLH120	AT5G51790	2.83788	3.87e-60
bHLH	BHLH109	AT1G68240	2.55938	3.87e-15
bHLH	BHLH113	AT3G19500	2.54906	5.17e-35
bHLH	BHLH25	AT4G37850	2.29451	1.06e-35
bHLH	SPT	AT4G36930	1.97051	2.08e-150
bHLH	BHLH96	AT1G72210	1.84982	5.97e-45
bHLH	HEC1	AT5G67060	1.49943	1.69e-17
bHLH	BHLH41	AT5G56960	1.34573	0.0446483
bHLH	BHLH100	AT2G41240	1.19601	0.00298246
bHLH	BHLH76	AT1G26260	1.16532	2.54e-20
bHLH	BHLH23	AT4G28790	1.02917	1.52e-11
CO-like	COL1	AT5G15850	1.54074	1.48e-48
G2-like	AT3G12730	AT3G12730	2.04204	3.05e-99
G2-like	MYBC1	AT2G40970	1.04336	1.18e-25
G2-like	BOA	AT5G59570	1.01956	2.01e-09
GeBP	AT4G00250	AT4G00250	1.34674	3.48e-05
Dof	DOF4.7	AT4G38000	1.9447	0.00587931
Dof	DOF3.6	AT3G55370	1.374	1.55e-26
TCP	TCP9	AT2G45680	1.00174	2.48e-28
MYB	MYB15	AT3G23250	5.04632	0
MYB_related	TCL1	AT2G30432	3.6858	6.03e-79
MYB_related	AT2G44430	AT2G44430	1.22921	1.9e-41
M-type_MADS	AGL80	AT5G48670	1.80722	4.27e-14
