# Supplementary material for: A FUS3-VAL transcriptional negative feedback circuit terminates seed maturation program and safeguards vegetative development
Source: Research Square preprint supplement (doi:10.21203/rs.3.rs-7986565/v1), 2025-11-12
Supplement: Supplementary file 8 [file bab3bd5c17215a8c9313c017.xlsx]

## Sheet: FUS3-GR-FLAG target genes
ID	name
AT1G01020	ARV1
AT1G01030	NGA3
AT1G01040	DCL1
AT1G01050	PPA1
AT1G01060	LHY
AT1G01070	AT1G01070
AT1G01073	AT1G01073
AT1G01090	PDH-E1 ALPHA
AT1G01100	RPP1A
AT1G01115	AT1G01115
AT1G01120	KCS1
AT1G01130	AT1G01130
AT1G01140	CIPK9
AT1G01180	AT1G01180
AT1G01183	MIR165A
AT1G01190	CYP78A8
AT1G01225	AT1G01225
AT1G01230	AT1G01230
AT1G01240	AT1G01240
AT1G01250	ERF023
AT1G01260	BHLH13
AT1G01270	AT1G01270
AT1G01300	AT1G01300
AT1G01310	AT1G01310
AT1G01320	AT1G01320
AT1G01360	PYL9
AT1G01380	ETC1
AT1G01390	UGT72B2
AT1G01420	UGT72B3
AT1G01430	TBL25
AT1G01440	AT1G01440
AT1G01453	AT1G01453
AT1G01471	AT1G01471
AT1G01480	ACS2
AT1G01490	AT1G01490
AT1G01500	AT1G01500
AT1G01540	AT1G01540
AT1G01550	BPS1
AT1G01570	AT1G01570
AT1G01580	FRO2
AT1G01600	CYP86A4
AT1G01610	GPAT4
AT1G01620	PIP1-3
AT1G01630	AT1G01630
AT1G01650	SPPL4
AT1G01670	PUB56
AT1G01720	NAC002
AT1G01760	AT1G01760
AT1G01800	AT1G01800
AT1G01810	AT1G01810
AT1G01820	PEX11C
AT1G01830	AT1G01830
AT1G01860	PFC1
AT1G01890	AT1G01890
AT1G01910	AT1G01910
AT1G01950	ARK2
AT1G01990	AT1G01990
AT1G02030	ZAT1
AT1G02040	AT1G02040
AT1G02060	AT1G02060
AT1G02065	SPL8
AT1G02070	AT1G02070
AT1G02090	CSN7
AT1G02110	AT1G02110
AT1G02136	AT1G02136
AT1G02170	AMC1
AT1G02180	AT1G02180
AT1G02205	CER1
AT1G02210	AT1G02210
AT1G02220	NAC003
AT1G02228	AT1G02228
AT1G02230	NAC004
AT1G02250	NAC005
AT1G02260	AT1G02260
AT1G02300	AT1G02300
AT1G02305	AT1G02305
AT1G02310	MAN1
AT1G02335	GL22
AT1G02340	HFR1
AT1G02350	AT1G02350
AT1G02360	AT1G02360
AT1G02380	AT1G02380
AT1G02390	GPAT2
AT1G02391	AT1G02391
AT1G02400	GA2OX6
AT1G02405	AT1G02405
AT1G02410	COX11
AT1G02450	NIMIN-1
AT1G02460	AT1G02460
AT1G02475	AT1G02475
AT1G02560	CLPP5
AT1G02590	AT1G02590
AT1G02610	AT1G02610
AT1G02630	ETN8
AT1G02640	BXL2
AT1G02650	AT1G02650
AT1G02660	AT1G02660
AT1G02670	AT1G02670
AT1G02700	AT1G02700
AT1G02720	GATL5
AT1G02770	AT1G02770
AT1G02800	CEL2
AT1G02810	PME7
AT1G02813	AT1G02813
AT1G02816	AT1G02816
AT1G02850	BGLU11
AT1G02860	BAH1
AT1G02880	TPK1
AT1G02890	AT1G02890
AT1G02900	RALF1
AT1G02930	GSTF6
AT1G02950	GSTF4
AT1G02990	AT1G02990
AT1G03000	PEX6
AT1G03020	GRXS1
AT1G03030	AT1G03030
AT1G03040	BHLH7
AT1G03080	NET1D
AT1G03090	MCCA
AT1G03100	AT1G03100
AT1G03106	AT1G03106
AT1G03120	ATRAB28
AT1G03130	PSAD2
AT1G03160	FZL
AT1G03170	FAF2
AT1G03180	AT1G03180
AT1G03200	AT1G03200
AT1G03220	AT1G03220
AT1G03250	AT1G03250
AT1G03270	CBSDUF4
AT1G03290	AT1G03290
AT1G03340	AT1G03340
AT1G03365	RF4
AT1G03370	AT1G03370
AT1G03410	2A6
AT1G03440	AT1G03440
AT1G03457	BRN2
AT1G03470	NET3A
AT1G03510	PCMP-E3
AT1G03520	AT1G03520
AT1G03540	PCMP-E4
AT1G03550	SCAMP2
AT1G03590	PPC6-6
AT1G03610	AT1G03610
AT1G03630	PORC
AT1G03640	AT1G03640
AT1G03650	AT1G03650
AT1G03670	AT1G03670
AT1G03700	AT1G03700
AT1G03710	AT1G03710
AT1G03720	AT1G03720
AT1G03730	AT1G03730
AT1G03740	AT1G03740
AT1G03743	AT1G03743
AT1G03780	TPX2
AT1G03790	SOM
AT1G03800	ERF10
AT1G03830	AT1G03830
AT1G03840	MGP
AT1G03850	GRXS13
AT1G03880	CRB
AT1G03890	CRD
AT1G03905	ABCI19
AT1G03910	CTN
AT1G03930	ADK1
AT1G03970	GBF4
AT1G03980	PCS2
AT1G03990	FAO1
AT1G04000	AT1G04000
AT1G04010	PSAT
AT1G04030	AT1G04030
AT1G04040	AT1G04040
AT1G04050	SUVR1
AT1G04100	IAA10
AT1G04120	ABCC5
AT1G04130	TPR2
AT1G04150	AT1G04150
AT1G04171	AT1G04171
AT1G04180	YUC9
AT1G04210	AT1G04210
AT1G04220	KCS17
AT1G04240	IAA3
AT1G04250	IAA17
AT1G04260	PRA1D
AT1G04270	RPS15A
AT1G04300	AT1G04300
AT1G04310	ERS2
AT1G04320	AT1G04320
AT1G04330	AT1G04330
AT1G04350	AT1G04350
AT1G04370	ERF14
AT1G04400	CRY2
AT1G04410	MDH1
AT1G04430	AT1G04430
AT1G04440	CKL13
AT1G04480	RPL23C
AT1G04490	AT1G04490
AT1G04520	CRRSP3
AT1G04530	TPR4
AT1G04550	IAA12
AT1G04560	AT1G04560
AT1G04570	AT1G04570
AT1G04600	XI-A
AT1G04610	YUC3
AT1G04620	HCAR
AT1G04625	AT1G04625
AT1G04650	AT1G04650
AT1G04660	AT1G04660
AT1G04670	AT1G04670
AT1G04680	AT1G04680
AT1G04684	AT1G04684
AT1G04690	KAB1
AT1G04700	AT1G04700
AT1G04710	KAT1
AT1G04770	AT1G04770
AT1G04778	AT1G04778
AT1G04780	AT1G04780
AT1G04790	AT1G04790
AT1G04800	AT1G04800
AT1G04820	TUBA4
AT1G04830	AT1G04830
AT1G04840	PCMP-H64
AT1G04920	SPS3
AT1G04945	AT1G04945
AT1G04950	TAF6
AT1G04960	AT1G04960
AT1G04985	AT1G04985
AT1G04990	AT1G04990
AT1G05000	AT1G05000
AT1G05010	ACO4
AT1G05020	AP180
AT1G05030	AT1G05030
AT1G05065	CLE20
AT1G05070	AT1G05070
AT1G05090	AT1G05090
AT1G05100	MAPKKK18
AT1G05120	AT1G05120
AT1G05135	AT1G05135
AT1G05140	ARASP2
AT1G05150	AT1G05150
AT1G05170	B3GALT2
AT1G05200	GLR3.4
AT1G05230	HDG2
AT1G05240	PER1
AT1G05260	PER3
AT1G05270	AT1G05270
AT1G05300	ZIP5
AT1G05310	PME8
AT1G05350	AT1G05350
AT1G05370	AT1G05370
AT1G05380	AT1G05380
AT1G05385	PSB27-2
AT1G05400	AT1G05400
AT1G05410	AT1G05410
AT1G05420	OFP12
AT1G05440	AT1G05440
AT1G05450	AT1G05450
AT1G05460	SDE3
AT1G05470	CVP2
AT1G05490	CLSY3
AT1G05510	AT1G05510
AT1G05520	AT1G05520
AT1G05530	UGT75B2
AT1G05550	AT1G05550
AT1G05560	UGT75B1
AT1G05562	AT1G05562
AT1G05570	CALS1
AT1G05575	AT1G05575
AT1G05580	CHX23
AT1G05630	5PTASE13
AT1G05640	AT1G05640
AT1G05650	AT1G05650
AT1G05660	AT1G05660
AT1G05680	UGT74E2
AT1G05710	AT1G05710
AT1G05750	PDE247
AT1G05770	JAL2
AT1G05785	AT1G05785
AT1G05800	DGL
AT1G05805	BHLH128
AT1G05810	ARA
AT1G05835	AT1G05835
AT1G05840	AT1G05840
AT1G05850	CTL1
AT1G05870	AT1G05870
AT1G05880	ARI12
AT1G05890	ARI5
AT1G05900	NTH2
AT1G05910	AT1G05910
AT1G05950	AT1G05950
AT1G05960	AT1G05960
AT1G06000	UGT89C1
AT1G06040	BBX24
AT1G06050	AT1G06050
AT1G06070	AT1G06070
AT1G06080	ADS1
AT1G06140	PCMP-E61
AT1G06148	AT1G06148
AT1G06150	EMB1444
AT1G06160	ERF094
AT1G06170	BHLH89
AT1G06180	ATMYB13
AT1G06190	RHON1
AT1G06270	AT1G06270
AT1G06290	ACX3
AT1G06330	AT1G06330
AT1G06340	AT1G06340
AT1G06360	AT1G06360
AT1G06370	AT1G06370
AT1G06390	ASK9
AT1G06400	RABA1A
AT1G06410	TPS7
AT1G06420	AT1G06420
AT1G06430	FTSH8
AT1G06460	ACD32.1
AT1G06475	AT1G06475
AT1G06480	AT1G06480
AT1G06490	CALS7
AT1G06510	AT1G06510
AT1G06520	GPAT1
AT1G06530	PMD2
AT1G06570	PDS1
AT1G06610	AT1G06610
AT1G06630	AT1G06630
AT1G06640	AT1G06640
AT1G06645	AT1G06645
AT1G06650	AT1G06650
AT1G06660	JASON
AT1G06680	PSBP1
AT1G06700	PTI11
AT1G06740	AT1G06740
AT1G06770	DRIP1
AT1G06780	GAUT6
AT1G06790	AT1G06790
AT1G06800	PLA-I{gamma}1
AT1G06810	AT1G06810
AT1G06840	AT1G06840
AT1G06850	AtbZIP52
AT1G06860	AT1G06860
AT1G06880	AT1G06880
AT1G06923	AT1G06923
AT1G06990	AT1G06990
AT1G07000	ATEXO70B2
AT1G07030	AT1G07030
AT1G07040	AT1G07040
AT1G07080	AT1G07080
AT1G07090	LSH6
AT1G07100	AT1G07100
AT1G07128	AT1G07128
AT1G07135	AT1G07135
AT1G07140	RANBP1A
AT1G07150	MAPKKK13
AT1G07170	AT1G07170
AT1G07175	AT1G07175
AT1G07180	NDA1
AT1G07200	AT1G07200
AT1G07220	AT1G07220
AT1G07230	NPC1
AT1G07260	UGT71C3
AT1G07280	AT1G07280
AT1G07350	SR45A
AT1G07390	AtRLP1
AT1G07420	SMO2-2
AT1G07430	AIP1
AT1G07440	AT1G07440
AT1G07485	AT1G07485
AT1G07500	AT1G07500
AT1G07510	FTSH10
AT1G07520	SCL31
AT1G07530	SCL14
AT1G07540	TRP5
AT1G07570	APK1A
AT1G07580	AT1G07580
AT1G07590	AT1G07590
AT1G07610	MT1C
AT1G07630	PLL5
AT1G07640	DOF1.1
AT1G07645	ATDSI-1VOC
AT1G07650	AT1G07650
AT1G07670	ECA4
AT1G07680	AT1G07680
AT1G07700	AT1G07700
AT1G07710	AT1G07710
AT1G07720	KCS3
AT1G07725	ATEXO70H6
AT1G07740	AT1G07740
AT1G07745	RAD51D
AT1G07760	AT1G07760
AT1G07780	PAI1
AT1G07860	AT1G07860
AT1G07870	AT1G07870
AT1G07885	AT1G07885
AT1G07901	AT1G07901
AT1G07930	A3
AT1G07980	NF-YC10
AT1G08030	TPST
AT1G08060	MOM1
AT1G08070	PCMP-H12
AT1G08080	ACA7
AT1G08090	NRT2.1
AT1G08100	AT1G08100
AT1G08110	AT1G08110
AT1G08115	AT1G08115
AT1G08130	LIG1
AT1G08165	AT1G08165
AT1G08180	SMR2
AT1G08200	AXS2
AT1G08210	AT1G08210
AT1G08220	AT1G08220
AT1G08230	GAT1
AT1G08240	AT1G08240
AT1G08290	WIP3
AT1G08300	NVL
AT1G08310	AT1G08310
AT1G08315	AT1G08315
AT1G08320	TGA9
AT1G08370	DCP1
AT1G08380	PSAO
AT1G08440	ALMT2
AT1G08460	HDA8
AT1G08465	YAB2
AT1G08470	SSL3
AT1G08490	NFS2
AT1G08500	ENODL18
AT1G08510	FATB
AT1G08570	ACHT4
AT1G08580	AT1G08580
AT1G08620	JMJ16
AT1G08630	THA1
AT1G08650	PPCK1
AT1G08680	AGD14
AT1G08700	PS1
AT1G08720	EDR1
AT1G08800	MYOB1
AT1G08820	PVA22
AT1G08830	CSD1
AT1G08860	BON3
AT1G08870	AT1G08870
AT1G08910	AT1G08910
AT1G08920	SUGTL2
AT1G08930	ERD6
AT1G08940	AT1G08940
AT1G08980	AMI1
AT1G08990	GUX5
AT1G09000	ANP1
AT1G09010	EBM
AT1G09020	SNF4
AT1G09040	AT1G09040
AT1G09050	AT1G09050
AT1G09060	AT1G09060
AT1G09070	SRC2
AT1G09090	RBOHB
AT1G09130	CLPR3
AT1G09140	SR30
AT1G09155	PP2B15
AT1G09157	AT1G09157
AT1G09160	AT1G09160
AT1G09180	ATSAR1
AT1G09210	CRT2
AT1G09230	SNRNP65
AT1G09240	NAS3
AT1G09250	BHLH149
AT1G09270	IMPA4
AT1G09310	AT1G09310
AT1G09350	GOLS3
AT1G09380	AT1G09380
AT1G09390	AT1G09390
AT1G09415	NIMIN-3
AT1G09420	G6PD4
AT1G09440	AT1G09440
AT1G09460	AT1G09460
AT1G09470	AT1G09470
AT1G09480	AT1G09480
AT1G09486	AT1G09486
AT1G09490	AT1G09490
AT1G09500	AT1G09500
AT1G09520	AT1G09520
AT1G09530	PIF3
AT1G09540	MYB61
AT1G09560	GLP4
AT1G09570	PHYA
AT1G09575	AT1G09575
AT1G09580	AT1G09580
AT1G09590	RPL21A
AT1G09630	RABA2A
AT1G09645	AT1G09645
AT1G09690	RPL21A
AT1G09750	AT1G09750
AT1G09780	PGM1
AT1G09795	HISN1B
AT1G09800	AT1G09800
AT1G09810	ECT11
AT1G09812	AT1G09812
AT1G09850	XBCP3
AT1G09870	AT1G09870
AT1G09880	AT1G09880
AT1G09910	AT1G09910
AT1G09920	AT1G09920
AT1G09930	OPT2
AT1G09932	AT1G09932
AT1G09935	AT1G09935
AT1G09940	HEMA2
AT1G09950	RAS1
AT1G09960	SUC4
AT1G09970	LRR XI-23
AT1G09980	AT1G09980
AT1G09995	AT1G09995
AT1G10020	AT1G10020
AT1G10060	BCAT1
AT1G10070	BCAT2
AT1G10090	AT1G10090
AT1G10095	AT1G10095
AT1G10120	BHLH74
AT1G10130	ECA3
AT1G10140	AT1G10140
AT1G10150	PP2A10
AT1G10170	NFXL1
AT1G10200	WLIM1
AT1G10220	AT1G10220
AT1G10230	ASK18
AT1G10270	GRP23
AT1G10280	AT1G10280
AT1G10340	AT1G10340
AT1G10360	GSTU18
AT1G10370	GSTU17
AT1G10380	AT1G10380
AT1G10385	EXO84A
AT1G10390	NUP98A
AT1G10400	UGT90A2
AT1G10410	AT1G10410
AT1G10417	AT1G10417
AT1G10419	AT1G10419
AT1G10430	PP2A2
AT1G10440	AT1G10440
AT1G10460	GLP7
AT1G10470	ARR4
AT1G10480	ZFP5
AT1G10490	AT1G10490
AT1G10500	ISCA
AT1G10520	AT1G10520
AT1G10530	AT1G10530
AT1G10538	AT1G10538
AT1G10540	NAT8
AT1G10550	XTH33
AT1G10560	PUB18
AT1G10570	ULP1C
AT1G10580	AT1G10580
AT1G10610	BHLH90
AT1G10620	AT1G10620
AT1G10630	ATARFA1F
AT1G10640	AT1G10640
AT1G10650	AT1G10650
AT1G10652	AT1G10652
AT1G10657	AT1G10657
AT1G10660	AT1G10660
AT1G10680	ABCB10
AT1G10682	AT1G10682
AT1G10690	AT1G10690
AT1G10700	PRS3
AT1G10710	PHS1
AT1G10717	ESF1.3
AT1G10720	AT1G10720
AT1G10740	AT1G10740
AT1G10745	AT1G10745
AT1G10747	ESF1.1
AT1G10750	AT1G10750
AT1G10770	AT1G10770
AT1G10840	TIF3H1
AT1G10850	AT1G10850
AT1G10865	AT1G10865
AT1G10890	AT1G10890
AT1G10910	AT1G10910
AT1G10940	SRK2A
AT1G10950	TMN1
AT1G10960	FD1
AT1G11010	AT1G11010
AT1G11030	AT1G11030
AT1G11040	AT1G11040
AT1G11060	AT1G11060
AT1G11080	SCPL31
AT1G11090	AT1G11090
AT1G11112	AT1G11112
AT1G11120	AT1G11120
AT1G11125	AT1G11125
AT1G11130	SUB
AT1G11160	AT1G11160
AT1G11170	AT1G11170
AT1G11180	SCAMP5
AT1G11185	AT1G11185
AT1G11210	AT1G11210
AT1G11220	AT1G11220
AT1G11230	AT1G11230
AT1G11250	SYP125
AT1G11260	STP1
AT1G11280	AT1G11280
AT1G11310	MLO2
AT1G11320	AT1G11320
AT1G11330	AT1G11330
AT1G11350	SD113
AT1G11360	AT1G11360
AT1G11370	PME56
AT1G11380	AT1G11380
AT1G11390	AT1G11390
AT1G11450	AT1G11450
AT1G11460	AT1G11460
AT1G11530	CXXS1
AT1G11545	XTH8
AT1G11550	AT1G11550
AT1G11572	AT1G11572
AT1G11580	PME18
AT1G11590	PME19
AT1G11620	AT1G11620
AT1G11650	RBP45B
AT1G11660	HSP70-16
AT1G11670	AT1G11670
AT1G11680	CYP51G1
AT1G11700	AT1G11700
AT1G11710	AT1G11710
AT1G11720	SS3
AT1G11740	AT1G11740
AT1G11790	ADT1
AT1G11800	AT1G11800
AT1G11840	ATGLX1
AT1G11850	AT1G11850
AT1G11905	AT1G11905
AT1G11910	APA1
AT1G11920	AT1G11920
AT1G11950	AT1G11950
AT1G11960	AT1G11960
AT1G12020	AT1G12020
AT1G12030	AT1G12030
AT1G12050	AT1G12050
AT1G12060	BAG5
AT1G12064	AT1G12064
AT1G12070	AT1G12070
AT1G12080	AT1G12080
AT1G12090	ELP
AT1G12100	AT1G12100
AT1G12110	NPF6.3
AT1G12120	AT1G12120
AT1G12140	FMOGS-OX5
AT1G12180	AT1G12180
AT1G12190	AT1G12190
AT1G12200	AT1G12200
AT1G12210	RFL1
AT1G12230	AT1G12230
AT1G12240	BFRUCT4
AT1G12270	HOP1
AT1G12290	AT1G12290
AT1G12310	CML13
AT1G12320	AT1G12320
AT1G12360	KEU
AT1G12370	PHR1
AT1G12380	AT1G12380
AT1G12390	AT1G12390
AT1G12423	AT1G12423
AT1G12430	ARK3
AT1G12440	SAP1
AT1G12460	AT1G12460
AT1G12470	AT1G12470
AT1G12490	AT1G12490
AT1G12500	AT1G12500
AT1G12510	AT1G12510
AT1G12540	AT1G12540
AT1G12550	HPR3
AT1G12560	EXPA7
AT1G12580	PEPKR1
AT1G12590	AT1G12590
AT1G12600	UTR4
AT1G12610	DREB1F
AT1G12640	LPLAT1
AT1G12680	PEPKR2
AT1G12710	P2A12
AT1G12730	AT1G12730
AT1G12740	CYP87A2
AT1G12750	RBL6
AT1G12780	UGE1
AT1G12790	AT1G12790
AT1G12820	AFB3
AT1G12830	AT1G12830
AT1G12845	AT1G12845
AT1G12860	SCRM2
AT1G12890	ERF088
AT1G12900	GAPA2
AT1G12950	RSH2
AT1G12990	AT1G12990
AT1G13020	EIF4B2
AT1G13040	AT1G13040
AT1G13060	PBE1
AT1G13080	CYP71B2
AT1G13110	CYP71B7
AT1G13140	CYP86C3
AT1G13145	AT1G13145
AT1G13170	ORP1D
AT1G13180	ARP3
AT1G13190	AT1G13190
AT1G13195	AT1G13195
AT1G13210	ALA11
AT1G13220	CRWN2
AT1G13230	PII-2
AT1G13240	AT1G13240
AT1G13245	RTFL17
AT1G13250	GATL3
AT1G13260	RAV1
AT1G13280	AOC4
AT1G13300	HRS1
AT1G13340	AT1G13340
AT1G13350	AT1G13350
AT1G13360	AT1G13360
AT1G13370	AT1G13370
AT1G13380	AT1G13380
AT1G13390	AT1G13390
AT1G13410	AT1G13410
AT1G13430	STO9
AT1G13440	GAPC2
AT1G13510	AT1G13510
AT1G13520	AT1G13520
AT1G13550	AT1G13550
AT1G13560	AAPT1
AT1G13570	AT1G13570
AT1G13590	PSK1
AT1G13600	AtbZIP58
AT1G13605	AT1G13605
AT1G13607	AT1G13607
AT1G13620	RGF2
AT1G13630	AT1G13630
AT1G13635	AT1G13635
AT1G13640	PI4KG6
AT1G13670	AT1G13670
AT1G13690	ATE1
AT1G13700	PGL1
AT1G13710	CYP78A5
AT1G13720	AT1G13720
AT1G13740	AFP2
AT1G13750	PAP1
AT1G13755	AT1G13755
AT1G13840	AT1G13840
AT1G13850	AT1G13850
AT1G13860	QUL1
AT1G13930	AT1G13930
AT1G13940	AT1G13940
AT1G13950	ELF5A-1
AT1G13960	WRKY4
AT1G13990	AT1G13990
AT1G14000	VIK
AT1G14010	AT1G14010
AT1G14040	PHO1
AT1G14080	FUT6
AT1G14090	AT1G14090
AT1G14120	AT1G14120
AT1G14130	AT1G14130
AT1G14160	AT1G14160
AT1G14170	AT1G14170
AT1G14200	AT1G14200
AT1G14210	AT1G14210
AT1G14240	APY3
AT1G14260	AT1G14260
AT1G14270	AT1G14270
AT1G14290	SBH2
AT1G14320	RPL10A
AT1G14330	AT1G14330
AT1G14340	AT1G14340
AT1G14345	AT1G14345
AT1G14350	FLP
AT1G14360	UTR3
AT1G14370	APK2A
AT1G14380	IQD28
AT1G14390	AT1G14390
AT1G14420	AT59
AT1G14430	AT1G14430
AT1G14440	ZHD4
AT1G14460	F14L17.24
AT1G14490	AHL28
AT1G14510	AL7
AT1G14518	AT1G14518
AT1G14520	MIOX1
AT1G14530	THH1
AT1G14540	PER4
AT1G14549	AT1G14549
AT1G14560	AT1G14560
AT1G14570	PUX7
AT1G14580	IDD6
AT1G14590	AT1G14590
AT1G14600	AT1G14600
AT1G14620	DECOY
AT1G14630	AT1G14630
AT1G14640	AT1G14640
AT1G14660	NHX8
AT1G14685	BPC2
AT1G14687	ZHD14
AT1G14690	MAP65-7
AT1G14700	PAP3
AT1G14710	AT1G14710
AT1G14720	XTH28
AT1G14730	CYB561C
AT1G14740	OBE3
AT1G14750	SDS
AT1G14780	AT1G14780
AT1G14840	MAP70.4
AT1G14860	NUDT18
AT1G14870	PCR2
AT1G14890	AT1G14890
AT1G14900	HMGA
AT1G14910	AT1G14910
AT1G14920	GAI
AT1G14960	AT1G14960
AT1G14970	AT1G14970
AT1G14990	AT1G14990
AT1G15020	QSOX1
AT1G15030	AT1G15030
AT1G15040	AT1G15040
AT1G15060	AT1G15060
AT1G15080	LPP2
AT1G15090	AT1G15090
AT1G15100	RHA2A
AT1G15110	PSS1
AT1G15120	AT1G15120
AT1G15125	AT1G15125
AT1G15130	AT1G15130
AT1G15140	AT1G15140
AT1G15165	AT1G15165
AT1G15175	AT1G15175
AT1G15190	FLA19
AT1G15200	AT1G15200
AT1G15210	ABCG35
AT1G15220	CCMH
AT1G15250	RPL37A
AT1G15290	AT1G15290
AT1G15300	AT1G15300
AT1G15310	SRP-54A
AT1G15320	AT1G15320
AT1G15340	MBD10
AT1G15350	AT1G15350
AT1G15360	WIN1
AT1G15370	AT1G15370
AT1G15400	AT1G15400
AT1G15405	AT1G15405
AT1G15410	AT1G15410
AT1G15420	AT1G15420
AT1G15450	AT1G15450
AT1G15460	BOR4
AT1G15480	AT1G15480
AT1G15490	AT1G15490
AT1G15500	AATP2
AT1G15510	PCMP-H73
AT1G15520	ABCG40
AT1G15530	LECRKS1
AT1G15550	GA3OX1
AT1G15560	AT1G15560
AT1G15570	CYCA2-3
AT1G15610	AT1G15610
AT1G15650	AT1G15650
AT1G15670	AT1G15670
AT1G15680	AT1G15680
AT1G15690	AVP1
AT1G15740	AT1G15740
AT1G15750	TPL
AT1G15757	AT1G15757
AT1G15800	AT1G15800
AT1G15820	LHCB6
AT1G15860	AT1G15860
AT1G15870	AT1G15870
AT1G15880	GOS11
AT1G15900	AT1G15900
AT1G15930	RPS12A
AT1G15940	AT1G15940
AT1G15950	CCR1
AT1G15960	NRAMP6
AT1G15970	AT1G15970
AT1G16010	MRS2-1
AT1G16100	AT1G16100
AT1G16130	WAKL2
AT1G16150	WAKL4
AT1G16190	RAD23A
AT1G16210	AT1G16210
AT1G16230	AT1G16230
AT1G16260	WAKL8
AT1G16300	GAPCP2
AT1G16330	CYCB3
AT1G16360	ALIS4
AT1G16370	AT1G16370
AT1G16390	AT1G16390
AT1G16400	CYP79F2
AT1G16410	CYP79F1
AT1G16420	AMC8
AT1G16460	STR2
AT1G16480	AT1G16480
AT1G16490	ATMYB58
AT1G16500	AT1G16500
AT1G16510	SAUR41
AT1G16515	AT1G16515
AT1G16530	LBD3
AT1G16570	AT1G16570
AT1G16635	AT1G16635
AT1G16660	AT1G16660
AT1G16670	AT1G16670
AT1G16705	AT1G16705
AT1G16710	HAC12
AT1G16720	HCF173
AT1G16730	UP6
AT1G16750	AT1G16750
AT1G16760	AT1G16760
AT1G16780	VHP2
AT1G16820	AT1G16820
AT1G16840	AT1G16840
AT1G16850	AT1G16850
AT1G16890	UBC36
AT1G16916	AT1G16916
AT1G16920	RABA1B
AT1G16950	AT1G16950
AT1G16970	KU70
AT1G17010	AT1G17010
AT1G17040	SHA
AT1G17060	CYP72C1
AT1G17080	AT1G17080
AT1G17090	AT1G17090
AT1G17110	UBP15
AT1G17120	CAT8
AT1G17140	ICR1
AT1G17147	VQ1
AT1G17150	AT1G17150
AT1G17180	GSTU25
AT1G17190	GSTU26
AT1G17200	AT1G17200
AT1G17210	ATILP1
AT1G17230	AT1G17230
AT1G17240	RLP2
AT1G17290	ALAAT1
AT1G17300	AT1G17300
AT1G17340	SAC5
AT1G17345	AT1G17345
AT1G17360	AT1G17360
AT1G17370	UBP1B
AT1G17380	TIFY11A
AT1G17400	AT1G17400
AT1G17420	LOX3
AT1G17430	AT1G17430
AT1G17440	TAF12B
AT1G17450	AT1G17450
AT1G17460	TRFL3
AT1G17480	IQD7
AT1G17495	AT1G17495
AT1G17530	TIM23-1
AT1G17550	HAB2
AT1G17560	HLL
AT1G17590	NFYA8
AT1G17600	AT1G17600
AT1G17620	AT1G17620
AT1G17650	GLYR2
AT1G17660	AT1G17660
AT1G17665	AT1G17665
AT1G17700	PRA1F1
AT1G17710	AT1G17710
AT1G17720	PP2AB2
AT1G17744	AT1G17744
AT1G17745	PGDH2
AT1G17750	PEPR2
AT1G17770	AT1G17770
AT1G17790	GTE5
AT1G17810	TIP3-2
AT1G17820	AT1G17820
AT1G17830	AT1G17830
AT1G17840	ABCG11
AT1G17910	AT1G17910
AT1G17920	HDG12
AT1G17940	AT1G17940
AT1G17950	ATMYB52
AT1G17970	AT1G17970
AT1G18070	AT1G18070
AT1G18100	MFT
AT1G18120	AT1G18120
AT1G18140	LAC1
AT1G18180	AT1G18180
AT1G18190	GC2
AT1G18191	AT1G18191
AT1G18200	RABA6B
AT1G18250	ATLP-1
AT1G18260	HRD3A
AT1G18270	AT1G18270
AT1G18300	NUDT4
AT1G18310	AT1G18310
AT1G18330	RVE7
AT1G18340	AT1G18340
AT1G18350	MKK7
AT1G18360	AT1G18360
AT1G18370	NACK1
AT1G18382	AT1G18382
AT1G18400	BEE1
AT1G18410	AT1G18410
AT1G18415	AT1G18415
AT1G18460	AT1G18460
AT1G18470	AT1G18470
AT1G18500	IPMS1
AT1G18510	AT1G18510
AT1G18540	RPL6A
AT1G18560	AT1G18560
AT1G18570	MYB51
AT1G18580	GAUT11
AT1G18610	AT1G18610
AT1G18620	AT1G18620
AT1G18640	PSP
AT1G18650	PDCB3
AT1G18670	IBS1
AT1G18680	AT1G18680
AT1G18710	AtMYB47
AT1G18720	AT1G18720
AT1G18735	AT1G18735
AT1G18740	AT1G18740
AT1G18760	AT1G18760
AT1G18800	NRP2
AT1G18820	AT1G18820
AT1G18835	MIF3
AT1G18850	AT1G18850
AT1G18870	ICS2
AT1G18879	MIR837A
AT1G18880	NPF2.9
AT1G18890	CPK10
AT1G18900	AT1G18900
AT1G18910	AT1G18910
AT1G18940	AT1G18940
AT1G18970	GLP1
AT1G18990	MYOB5
AT1G19000	AT1G19000
AT1G19010	AT1G19010
AT1G19020	AT1G19020
AT1G19050	ARR7
AT1G19060	AT1G19060
AT1G19100	AT1G19100
AT1G19110	AT1G19110
AT1G19115	AT1G19115
AT1G19160	AT1G19160
AT1G19180	TIFY10A
AT1G19200	AT1G19200
AT1G19210	ERF017
AT1G19220	ARF19
AT1G19230	RBOHE
AT1G19240	AT1G19240
AT1G19250	FMO1
AT1G19260	AT1G19260
AT1G19270	DA1
AT1G19290	AT1G19290
AT1G19300	GATL1
AT1G19310	AT1G19310
AT1G19330	AT1G19330
AT1G19340	AT1G19340
AT1G19350	BZR2
AT1G19373	AT1G19373
AT1G19400	AT1G19400
AT1G19440	KCS4
AT1G19450	AT1G19450
AT1G19460	AT1G19460
AT1G19464	MIR864A
AT1G19480	AT1G19480
AT1G19485	AT1G19485
AT1G19490	AT1G19490
AT1G19520	NFD5
AT1G19530	AT1G19530
AT1G19540	AT1G19540
AT1G19570	DHAR1
AT1G19600	AT1G19600
AT1G19610	PDF1.4
AT1G19630	CYP722A1
AT1G19640	JMT
AT1G19650	SFH4
AT1G19660	BBD2
AT1G19700	BLH10
AT1G19720	DYW7
AT1G19730	TRX4
AT1G19750	AT1G19750
AT1G19770	PUP14
AT1G19790	SRS7
AT1G19800	TGD1
AT1G19810	AT1G19810
AT1G19830	AT1G19830
AT1G19835	FPP4
AT1G19840	AT1G19840
AT1G19850	ARF5
AT1G19870	IQD32
AT1G19900	AT1G19900
AT1G19910	VHA-C2
AT1G19920	APS2
AT1G19950	HVA22H
AT1G19960	AT1G19960
AT1G19968	AT1G19968
AT1G19970	AT1G19970
AT1G20010	TUBB5
AT1G20030	AT1G20030
AT1G20040	AT1G20040
AT1G20065	AT1G20065
AT1G20070	AT1G20070
AT1G20090	ARAC4
AT1G20100	AT1G20100
AT1G20120	AT1G20120
AT1G20132	AT1G20132
AT1G20170	AT1G20170
AT1G20200	RPN3A
AT1G20220	AT1G20220
AT1G20225	AT1G20225
AT1G20250	AT1G20250
AT1G20270	P4H3
AT1G20310	AT1G20310
AT1G20330	SMT2
AT1G20340	DRT112
AT1G20370	AT1G20370
AT1G20375	MIR394A
AT1G20380	AT1G20380
AT1G20390	AT1G20390
AT1G20410	AT1G20410
AT1G20430	AT1G20430
AT1G20440	COR47
AT1G20450	ERD10
AT1G20480	4CLL2
AT1G20500	4CLL4
AT1G20520	AT1G20520
AT1G20530	AT1G20530
AT1G20540	AT1G20540
AT1G20560	AAE1
AT1G20575	AT1G20575
AT1G20620	CAT3
AT1G20630	CAT1
AT1G20640	NLP4
AT1G20650	AT1G20650
AT1G20657	AT1G20657
AT1G20670	AT1G20670
AT1G20690	AT1G20690
AT1G20691	AT1G20691
AT1G20696	HMGB3
AT1G20780	PUB44
AT1G20790	AT1G20790
AT1G20816	OEP21A
AT1G20820	AT1G20820
AT1G20823	ATL80
AT1G20840	MSSP1
AT1G20850	XCP2
AT1G20860	PHT1-8
AT1G20875	AT1G20875
AT1G20880	AT1G20880
AT1G20890	AT1G20890
AT1G20900	AHL27
AT1G20925	AT1G20925
AT1G20940	AT1G20940
AT1G20967	AT1G20967
AT1G20970	AT1G20970
AT1G20980	SPL14
AT1G20990	AT1G20990
AT1G21000	AT1G21000
AT1G21010	AT1G21010
AT1G21020	AT1G21020
AT1G21050	AT1G21050
AT1G21070	AT1G21070
AT1G21080	AT1G21080
AT1G21100	AT1G21100
AT1G21130	AT1G21130
AT1G21140	AT1G21140
AT1G21250	WAK1
AT1G21270	WAK2
AT1G21280	AT1G21280
AT1G21290	AT1G21290
AT1G21310	EXT3
AT1G21320	AT1G21320
AT1G21326	AT1G21326
AT1G21327	AT1G21327
AT1G21360	GLTP2
AT1G21370	AT1G21370
AT1G21380	AT1G21380
AT1G21400	F24J8.4
AT1G21410	SKP2A
AT1G21440	AT1G21440
AT1G21450	SCL1
AT1G21475	AT1G21475
AT1G21520	AT1G21520
AT1G21525	AT1G21525
AT1G21540	AEE9
AT1G21560	AT1G21560
AT1G21590	AT1G21590
AT1G21640	NADK2
AT1G21650	SECA2
AT1G21660	AT1G21660
AT1G21670	AT1G21670
AT1G21680	AT1G21680
AT1G21695	AT1G21695
AT1G21730	AT1G21730
AT1G21738	AT1G21738
AT1G21750	PDIL1-1
AT1G21790	AT1G21790
AT1G21800	AT1G21800
AT1G21830	AT1G21830
AT1G21835	AT1G21835
AT1G21850	sks8
AT1G21860	sks7
AT1G21880	LYM1
AT1G21900	AT1G21900
AT1G21910	ERF012
AT1G21920	AT1G21920
AT1G21940	AT1G21940
AT1G21950	AT1G21950
AT1G21970	NFYB9
AT1G21975	AT1G21975
AT1G21980	PIP5K1
AT1G21990	AT1G21990
AT1G22015	B3GALT5
AT1G22030	AT1G22030
AT1G22040	AT1G22040
AT1G22050	MUB6
AT1G22060	AT1G22060
AT1G22067	AT1G22067
AT1G22070	TGA3
AT1G22100	AT1G22100
AT1G22170	AT1G22170
AT1G22180	AT1G22180
AT1G22190	RAP2-13
AT1G22210	TPPC
AT1G22220	AT1G22220
AT1G22230	AT1G22230
AT1G22250	AT1G22250
AT1G22260	ZYP1A
AT1G22280	PAPP2C
AT1G22290	AT1G22290
AT1G22310	MBD8
AT1G22330	AT1G22330
AT1G22360	UGT85A2
AT1G22370	UGT85A5
AT1G22380	UGT85A3
AT1G22400	UGT85A1
AT1G22403	AT1G22403
AT1G22410	AT1G22410
AT1G22430	AT1G22430
AT1G22440	AT1G22440
AT1G22460	AT1G22460
AT1G22470	AT1G22470
AT1G22490	BHLH94
AT1G22510	AT1G22510
AT1G22520	AT1G22520
AT1G22530	PATL2
AT1G22540	NPF5.10
AT1G22570	NPF5.15
AT1G22600	AT1G22600
AT1G22610	AT1G22610
AT1G22620	SAC1
AT1G22630	AT1G22630
AT1G22640	MYB3
AT1G22650	INVD
AT1G22690	GASA9
AT1G22710	SUC2
AT1G22720	AT1G22720
AT1G22767	AT1G22767
AT1G22790	AT1G22790
AT1G22800	AT1G22800
AT1G22810	ERF019
AT1G22830	PCMP-E24
AT1G22840	CYTC-1
AT1G22870	AT1G22870
AT1G22882	AT1G22882
AT1G22900	DIR11
AT1G22910	AT1G22910
AT1G22920	CSN5B
AT1G22930	AT1G22930
AT1G22940	TH1
AT1G22990	HIPP22
AT1G23000	AT1G23000
AT1G23020	FRO3
AT1G23030	PUB11
AT1G23040	AT1G23040
AT1G23050	AT1G23050
AT1G23060	AT1G23060
AT1G23074	AT1G23074
AT1G23080	PIN7
AT1G23090	SULTR3
AT1G23100	AT1G23100
AT1G23110	AT1G23110
AT1G23130	AT1G23130
AT1G23140	AT1G23140
AT1G23145	AT1G23145
AT1G23149	CPuORF29
AT1G23170	AT1G23170
AT1G23200	PME6
AT1G23201	AT1G23201
AT1G23205	AT1G23205
AT1G23220	AT1G23220
AT1G23290	RPL27AB
AT1G23300	AT1G23300
AT1G23310	GGAT1
AT1G23330	AT1G23330
AT1G23350	AT1G23350
AT1G23360	MENG
AT1G23380	KNAT6
AT1G23390	AT1G23390
AT1G23420	AT1G23420
AT1G23440	AT1G23440
AT1G23450	AT1G23450
AT1G23490	ARF2-A
AT1G23500	AT1G23500
AT1G23550	SRO2
AT1G23560	AT1G23560
AT1G23710	AT1G23710
AT1G23724	AT1G23724
AT1G23750	AT1G23750
AT1G23820	SPDS1
AT1G23860	RSZ21
AT1G23870	TPS9
AT1G23890	AT1G23890
AT1G23910	AT1G23910
AT1G23960	AT1G23960
AT1G23980	ATL47
AT1G23990	AT1G23990
AT1G24000	AT1G24000
AT1G24010	AT1G24010
AT1G24080	AT1G24080
AT1G24095	AT1G24095
AT1G24120	ATJ16
AT1G24130	AT1G24130
AT1G24145	AT1G24145
AT1G24147	AT1G24147
AT1G24148	AT1G24148
AT1G24150	ATFH4
AT1G24170	GATL8
AT1G24180	IAR4
AT1G24256	AT1G24256
AT1G24260	AT1G24260
AT1G24265	AT1G24265
AT1G24267	AT1G24267
AT1G24270	AT1G24270
AT1G24350	AT1G24350
AT1G24388	AT1G24388
AT1G24400	LHT2
AT1G24405	AT1G24405
AT1G24440	AT1G24440
AT1G24460	AT1G24460
AT1G24470	KCR2
AT1G24480	AT1G24480
AT1G24530	AT1G24530
AT1G24540	CYP86C1
AT1G24575	AT1G24575
AT1G24580	AT1G24580
AT1G24590	ESR2
AT1G24600	AT1G24600
AT1G24620	CML25
AT1G24625	ZFP7
AT1G24733	AT1G24733
AT1G25220	ASB1
AT1G25230	PAP4
AT1G25240	AT1G25240
AT1G25250	IDD16
AT1G25260	AT1G25260
AT1G25275	AT1G25275
AT1G25280	TULP10
AT1G25310	MEE8
AT1G25320	AT1G25320
AT1G25340	MYB116
AT1G25350	OVA9
AT1G25370	AT1G25370
AT1G25380	NDT2
AT1G25390	AT1G25390
AT1G25400	AT1G25400
AT1G25410	IPT6
AT1G25420	AT1G25420
AT1G25425	CLE43
AT1G25430	AT1G25430
AT1G25440	COL16
AT1G25460	AT1G25460
AT1G25480	ALMT4
AT1G25500	AT1G25500
AT1G25520	AT1G25520
AT1G25530	AT1G25530
AT1G25550	AT1G25550
AT1G25560	TEM1
AT1G25570	AT1G25570
AT1G25580	NAC008
AT1G25682	AT1G25682
AT1G26090	AT1G26090
AT1G26100	CYB561D
AT1G26130	ALA12
AT1G26150	PERK10
AT1G26160	AT1G26160
AT1G26208	AT1G26208
AT1G26210	ATSOFL1
AT1G26220	AT1G26220
AT1G26230	CPN60B4
AT1G26240	AT1G26240
AT1G26260	BHLH76
AT1G26270	PI4KG5
AT1G26290	AT1G26290
AT1G26350	AT1G26350
AT1G26380	AT1G26380
AT1G26410	AT1G26410
AT1G26420	AT1G26420
AT1G26550	AT1G26550
AT1G26558	AT1G26558
AT1G26560	BGLU40
AT1G26570	UGD1
AT1G26580	AT1G26580
AT1G26590	AT1G26590
AT1G26600	CLE9
AT1G26620	AT1G26620
AT1G26640	AT1G26640
AT1G26660	AT1G26660
AT1G26670	VTI12
AT1G26690	AT1G26690
AT1G26720	AT1G26720
AT1G26730	PHO1-H7
AT1G26762	AT1G26762
AT1G26770	EXPA10
AT1G26771	AT1G26771
AT1G26773	AT1G26773
AT1G26790	DOF1.3
AT1G26800	AT1G26800
AT1G26810	B3GALT15
AT1G26830	CUL3A
AT1G26900	PCMP-E54
AT1G26911	AT1G26911
AT1G26916	AT1G26916
AT1G26920	AT1G26920
AT1G26930	AT1G26930
AT1G26940	CYP23
AT1G26945	PRE6
AT1G26950	AT1G26950
AT1G26960	ATHB-23
AT1G26970	AT1G26970
AT1G26973	MIR395A
AT1G26976	AT1G26976
AT1G26985	AT1G26985
AT1G27000	AT1G27000
AT1G27008	AT1G27008
AT1G27030	AT1G27030
AT1G27040	NPF4.5
AT1G27050	ATHB54
AT1G27070	AT1G27070
AT1G27090	AT1G27090
AT1G27100	AT1G27100
AT1G27110	AT1G27110
AT1G27120	B3GALT17
AT1G27130	GSTU13
AT1G27150	AT1G27150
AT1G27170	AT1G27170
AT1G27200	AT1G27200
AT1G27210	AT1G27210
AT1G27213	AT1G27213
AT1G27220	AT1G27220
AT1G27290	AT1G27290
AT1G27300	AT1G27300
AT1G27320	AHK3
AT1G27330	AT1G27330
AT1G27350	AT1G27350
AT1G27360	SPL11
AT1G27370	SPL10
AT1G27440	IRX10
AT1G27460	NPGR1
AT1G27461	AT1G27461
AT1G27470	AT1G27470
AT1G27500	AT1G27500
AT1G27510	EX2
AT1G27530	AT1G27530
AT1G27540	AT1G27540
AT1G27600	IRX9H
AT1G27630	CYCT1-3
AT1G27640	AT1G27640
AT1G27650	U2AF35A
AT1G27660	BHLH110
AT1G27690	AT1G27690
AT1G27710	AT1G27710
AT1G27740	BHLH54
AT1G27750	AT1G27750
AT1G27752	AT1G27752
AT1G27760	SAT32
AT1G27840	ATCSA-1
AT1G27930	AT1G27930
AT1G27950	LTPG1
AT1G27980	DPL1
AT1G28007	AT1G28007
AT1G28050	COL15
AT1G28070	AT1G28070
AT1G28080	AT1G28080
AT1G28100	AT1G28100
AT1G28110	SCPL45
AT1G28120	AT1G28120
AT1G28130	GH3.17
AT1G28135	AT1G28135
AT1G28160	ERF087
AT1G28170	SOT7
AT1G28180	RH44
AT1G28190	AT1G28190
AT1G28200	FIP1
AT1G28230	PUP1
AT1G28260	SMG7L
AT1G28270	AT1G28270
AT1G28280	VQ4
AT1G28310	DOF1.4
AT1G28320	DEG15
AT1G28323	AT1G28323
AT1G28330	DYL1
AT1G28340	AtRLP4
AT1G28360	ERF12
AT1G28370	ERF11
AT1G28375	AT1G28375
AT1G28380	NSL1
AT1G28395	AT1G28395
AT1G28400	AT1G28400
AT1G28410	AT1G28410
AT1G28430	CYP705A24
AT1G28440	HSL1
AT1G28447	AT1G28447
AT1G28480	GRXC9
AT1G28520	VOZ1
AT1G28530	AT1G28530
AT1G28580	AT1G28580
AT1G28591	AT1G28591
AT1G28600	AT1G28600
AT1G28610	AT1G28610
AT1G28620	AT1G28620
AT1G28630	AT1G28630
AT1G28640	AT1G28640
AT1G28650	AT1G28650
AT1G28660	AT1G28660
AT1G28670	ARAB-1
AT1G28680	AT1G28680
AT1G28690	PCMP-E34
AT1G28760	AT1G28760
AT1G28930	AT1G28930
AT1G28960	NUDT15
AT1G28990	AT1G28990
AT1G29050	TBL38
AT1G29060	AT1G29060
AT1G29090	AT1G29090
AT1G29100	AT1G29100
AT1G29120	AT1G29120
AT1G29150	RPN6
AT1G29160	DOF1.5
AT1G29170	SCAR3
AT1G29230	CIPK18
AT1G29240	AT1G29240
AT1G29270	AT1G29270
AT1G29280	WRKY65
AT1G29290	AT1G29290
AT1G29300	UNE1
AT1G29330	ERD2A
AT1G29340	PUB17
AT1G29360	AT1G29360
AT1G29390	COR413IM2
AT1G29395	COR413IM1
AT1G29400	ML5
AT1G29410	PAI3
AT1G29418	AT1G29418
AT1G29465	AT1G29465
AT1G29590	eIF4E3
AT1G29600	AT1G29600
AT1G29640	AT1G29640
AT1G29650	AT1G29650
AT1G29660	AT1G29660
AT1G29670	AT1G29670
AT1G29680	AT1G29680
AT1G29690	CAD1
AT1G29715	AT1G29715
AT1G29720	RFK1
AT1G29750	RKF1
AT1G29760	AT1G29760
AT1G29785	AT1G29785
AT1G29810	AT1G29810
AT1G29850	AT1G29850
AT1G29870	AT1G29870
AT1G29880	GLYRS-1
AT1G29900	CARB
AT1G29920	LHCB1.2
AT1G29930	LHCB1.3
AT1G29950	BHLH144
AT1G29980	AT1G29980
AT1G30000	MNS3
AT1G30016	AT1G30016
AT1G30020	AT1G30020
AT1G30040	GA2OX2
AT1G30050	AT1G30050
AT1G30070	AT1G30070
AT1G30090	AT1G30090
AT1G30100	NCED5
AT1G30110	NUDT25
AT1G30120	PDH-E1 BETA
AT1G30130	AT1G30130
AT1G30135	TIFY5A
AT1G30150	AT1G30150
AT1G30170	AT1G30170
AT1G30190	AT1G30190
AT1G30200	AT1G30200
AT1G30210	TCP24
AT1G30220	INT2
AT1G30230	AT1G30230
AT1G30250	AT1G30250
AT1G30260	AT1G30260
AT1G30270	CIPK23
AT1G30280	AT1G30280
AT1G30290	AT1G30290
AT1G30300	AT1G30300
AT1G30310	AT1G30310
AT1G30320	AT1G30320
AT1G30330	ARF6
AT1G30340	AT1G30340
AT1G30350	AT1G30350
AT1G30360	ERD4
AT1G30370	AT1G30370
AT1G30380	PSAK
AT1G30400	ABCC1
AT1G30410	ATMRP13
AT1G30430	AT1G30430
AT1G30440	AT1G30440
AT1G30475	AT1G30475
AT1G30490	ATHB-9
AT1G30500	NFYA7
AT1G30530	UGT78D1
AT1G30570	HERK2
AT1G30590	AT1G30590
AT1G30600	AT1G30600
AT1G30610	EMB2279
AT1G30620	MUR4
AT1G30630	AT1G30630
AT1G30650	WRKY14
AT1G30660	T5I8.11
AT1G30690	PATL4
AT1G30700	AT1G30700
AT1G30720	AT1G30720
AT1G30730	AT1G30730
AT1G30757	AT1G30757
AT1G30780	AT1G30780
AT1G30795	AT1G30795
AT1G30800	AT1G30800
AT1G30820	AT1G30820
AT1G30825	ARPC2A
AT1G30835	SADHU1-2
AT1G30840	PUP4
AT1G30860	AT1G30860
AT1G30900	VSR6
AT1G30920	AT1G30920
AT1G30950	UFO
AT1G31010	OSB4
AT1G31030	AT1G31030
AT1G31040	AT1G31040
AT1G31050	BHLH111
AT1G31070	GLCNAC1PUT1
AT1G31120	POT10
AT1G31130	AT1G31130
AT1G31150	AT1G31150
AT1G31170	SRX
AT1G31173	MIR167D
AT1G31240	AT1G31240
AT1G31258	AT1G31258
AT1G31310	AT1G31310
AT1G31319	AT1G31319
AT1G31320	LBD4
AT1G31330	PSAF
AT1G31350	SKIP25
AT1G31355	AT1G31355
AT1G31358	AT1G31358
AT1G31410	AT1G31410
AT1G31450	AT1G31450
AT1G31460	AT1G31460
AT1G31470	NFD4
AT1G31480	SGR2
AT1G31510	AT1G31510
AT1G31540	AT1G31540
AT1G31550	AT1G31550
AT1G31580	ECS1
AT1G31630	AT1G31630
AT1G31710	AT1G31710
AT1G31720	AT1G31720
AT1G31730	AT1G31730
AT1G31760	AT1G31760
AT1G31772	AT1G31772
AT1G31790	PCMP-A1
AT1G31814	FRL2
AT1G31820	AT1G31820
AT1G31830	AT1G31830
AT1G31835	AT1G31835
AT1G31850	AT1G31850
AT1G31860	HISN2
AT1G31875	AT1G31875
AT1G31880	BRX
AT1G31910	AT1G31910
AT1G31920	PCMP-H11
AT1G31930	XLG3
AT1G31940	AT1G31940
AT1G32045	AT1G32045
AT1G32049	AT1G32049
AT1G32060	PRK
AT1G32090	AT1G32090
AT1G32100	PRR1
AT1G32110	AT1G32110
AT1G32120	AT1G32120
AT1G32160	AT1G32160
AT1G32170	XTH30
AT1G32172	AT1G32172
AT1G32190	AT1G32190
AT1G32200	ATS1
AT1G32230	RCD1
AT1G32240	KAN2
AT1G32290	AT1G32290
AT1G32337	AT1G32337
AT1G32340	NHL8
AT1G32350	AOX3
AT1G32360	AT1G32360
AT1G32400	TOM2A
AT1G32410	AT1G32410
AT1G32415	PCMP-E56
AT1G32450	NPF7.3
AT1G32460	AT1G32460
AT1G32530	MIP1
AT1G32540	LOL1
AT1G32550	FdC1
AT1G32582	MIR400
AT1G32610	AT1G32610
AT1G32640	MYC2
AT1G32650	AT1G32650
AT1G32670	AT1G32670
AT1G32680	AT1G32680
AT1G32690	AT1G32690
AT1G32700	AT1G32700
AT1G32710	AT1G32710
AT1G32730	AT1G32730
AT1G32740	AT1G32740
AT1G32770	NAC012
AT1G32780	AT1G32780
AT1G32860	AT1G32860
AT1G32890	AT1G32890
AT1G32900	GBSS1
AT1G32920	AT1G32920
AT1G32928	AT1G32928
AT1G32940	SBT3.5
AT1G32990	RPL11
AT1G33060	NAC014
AT1G33102	AT1G33102
AT1G33110	AT1G33110
AT1G33200	AT1G33200
AT1G33230	AT1G33230
AT1G33240	AT-GTL1
AT1G33250	AT1G33250
AT1G33260	AT1G33260
AT1G33270	AT1G33270
AT1G33280	BRN1
AT1G33330	AT1G33330
AT1G33350	PCMP-E57
AT1G33370	AT1G33370
AT1G33390	ATFAS4
AT1G33420	AT1G33420
AT1G33440	NPF4.4
AT1G33450	AT1G33450
AT1G33560	ADR1
AT1G33590	AT1G33590
AT1G33600	AT1G33600
AT1G33607	AT1G33607
AT1G33610	AT1G33610
AT1G33612	AT1G33612
AT1G33680	AT1G33680
AT1G33700	AT1G33700
AT1G33730	CYP76C5
AT1G33750	TPS22
AT1G33760	ERF022
AT1G33780	AT1G33780
AT1G33811	AT1G33811
AT1G33890	AT1G33890
AT1G33950	AT1G33950
AT1G33960	AIG1
AT1G33970	AT1G33970
AT1G33980	UPF3
AT1G33990	MES14
AT1G34030	RPS18A
AT1G34046	AT1G34046
AT1G34140	PAB1
AT1G34160	PCMP-H68
AT1G34200	AT1G34200
AT1G34210	SERK2
AT1G34245	EPF2
AT1G34250	AT1G34250
AT1G34300	AT1G34300
AT1G34315	AT1G34315
AT1G34320	AT1G34320
AT1G34360	AT1G34360
AT1G34370	STOP1
AT1G34418	AT1G34418
AT1G34430	EMB3003
AT1G34470	AT1G34470
AT1G34530	AT1G34530
AT1G34540	CYP94D1
AT1G34550	EMB2756
AT1G34580	STP5
AT1G34630	AT1G34630
AT1G34640	AT1G34640
AT1G34670	AtMYB93
AT1G35110	AT1G35110
AT1G35140	EXL1
AT1G35160	GRF4
AT1G35190	AT1G35190
AT1G35200	AT1G35200
AT1G35210	AT1G35210
AT1G35220	AT1G35220
AT1G35250	AT1G35250
AT1G35255	AT1G35255
AT1G35333	AT1G35333
AT1G35350	PHO1-H8
AT1G35400	AT1G35400
AT1G35430	AT1G35430
AT1G35460	BHLH80
AT1G35461	AT1G35461
AT1G35465	AT1G35465
AT1G35510	AT1G35510
AT1G35513	AT1G35513
AT1G35516	AT1G35516
AT1G35537	AT1G35537
AT1G35545	AT1G35545
AT1G35560	TCP23
AT1G35663	AT1G35663
AT1G35670	CPK11
AT1G35750	APUM10
AT1G35780	AT1G35780
AT1G35830	AT1G35830
AT1G35910	TPPD
AT1G36060	WIND3
AT1G36070	AT1G36070
AT1G36160	ACC1
AT1G36220	AT1G36220
AT1G36350	AT1G36350
AT1G36370	SHM7
AT1G36441	AT1G36441
AT1G36730	AT1G36730
AT1G36936	AT1G36936
AT1G36970	AT1G36970
AT1G36980	AT1G36980
AT1G37120	AT1G37120
AT1G37130	NIA2
AT1G37140	MCT1
AT1G37150	HCS2
AT1G38140	AT1G38140
AT1G41830	SKS6
AT1G42420	AT1G42420
AT1G42440	AT1G42440
AT1G42470	AT1G42470
AT1G42480	AT1G42480
AT1G42550	PMI1
AT1G42560	MLO9
AT1G42960	AT1G42960
AT1G42970	GAPB
AT1G42990	BZIP60
AT1G43160	RAP2-6
AT1G43180	AT1G43180
AT1G43580	AT1G43580
AT1G43600	AT1G43600
AT1G43630	AT1G43630
AT1G43670	AT1G43670
AT1G43777	AT1G43777
AT1G43850	SEU
AT1G43883	AT1G43883
AT1G43886	AT1G43886
AT1G43980	PCMP-E58
AT1G44000	SGRL
AT1G44020	AT1G44020
AT1G44090	GA20OX5
AT1G44100	AAP5
AT1G44110	CYCA1-1
AT1G44125	AT1G44125
AT1G44170	ALDH3H1
AT1G44350	ILL6
AT1G44542	AT1G44542
AT1G44575	PSBS
AT1G44707	AT1G44707
AT1G44750	PUP11
AT1G44760	AT1G44760
AT1G44790	AT1G44790
AT1G44800	AT1G44800
AT1G44830	ERF014
AT1G44890	AT1G44890
AT1G44940	AT1G44940
AT1G44941	AT1G44941
AT1G45000	RPT4B
AT1G45010	AT1G45010
AT1G45050	UBC15
AT1G45130	BGAL5
AT1G45145	TRX5
AT1G45160	IRE4
AT1G45190	AT1G45190
AT1G45201	ATTLL1
AT1G45207	AT1G45207
AT1G45211	AT1G45211
AT1G45248	AT1G45248
AT1G45616	AtRLP6
AT1G45688	AT1G45688
AT1G46192	AT1G46192
AT1G46264	HSFB4
AT1G46408	AT1G46408
AT1G46480	WOX4
AT1G46552	AT1G46552
AT1G46554	AT1G46554
AT1G46768	RAP2-1
AT1G46840	AT1G46840
AT1G47056	VFB1
AT1G47128	RD21A
AT1G47200	WPP2
AT1G47240	NRAMP2
AT1G47300	AT1G47300
AT1G47310	AT1G47310
AT1G47330	CBSDUF7
AT1G47370	AT1G47370
AT1G47400	AT1G47400
AT1G47480	CXE2
AT1G47490	RBP47C
AT1G47497	AT1G47497
AT1G47510	AT5PTASE11
AT1G47520	AT1G47520
AT1G47530	AT1G47530
AT1G47540	ATTI7
AT1G47560	SEC3B
AT1G47570	AT1G47570
AT1G47578	AT1G47578
AT1G47590	ATPUP20
AT1G47600	TGG4
AT1G47603	ATPUP19
AT1G47610	AT1G47610
AT1G47720	OSB1
AT1G47740	AT1G47740
AT1G47750	PEX11A
AT1G47780	AT1G47780
AT1G47840	HXK3
AT1G47860	AT1G47860
AT1G47880	AT1G47880
AT1G47890	AtRLP7
AT1G47970	AT1G47970
AT1G47980	AT1G47980
AT1G47990	GA2OX4
AT1G48000	MYB112
AT1G48050	KU80
AT1G48080	AT1G48080
AT1G48100	AT1G48100
AT1G48110	ECT7
AT1G48130	PER1
AT1G48175	emb2191
AT1G48200	AT1G48200
AT1G48230	AT1G48230
AT1G48260	CIPK17
AT1G48267	MIR161
AT1G48280	AT1G48280
AT1G48300	AT1G48300
AT1G48315	AT1G48315
AT1G48320	DHNAT1
AT1G48325	AT1G48325
AT1G48370	YSL8
AT1G48410	AGO1
AT1G48430	AT1G48430
AT1G48460	AT1G48460
AT1G48470	GLN1-5
AT1G48480	RKL1
AT1G48490	IRE3
AT1G48510	AT1G48510
AT1G48540	AT1G48540
AT1G48580	AT1G48580
AT1G48598	CPuORF31
AT1G48610	AT1G48610
AT1G48620	HON5
AT1G48650	AT1G48650
AT1G48745	AT1G48745
AT1G48790	AMSH1
AT1G48800	TPS28
AT1G48830	RPS7A
AT1G48870	AT1G48870
AT1G48880	TBL7
AT1G48910	YUC10
AT1G48953	AT1G48953
AT1G48960	AT1G48960
AT1G48990	AT1G48990
AT1G49000	AT1G49000
AT1G49005	CLE11
AT1G49010	AT1G49010
AT1G49050	AT1G49050
AT1G49060	AT1G49060
AT1G49130	COL8
AT1G49160	WNK7
AT1G49170	AT1G49170
AT1G49200	ATL75
AT1G49240	ACT8
AT1G49245	AT1G49245
AT1G49280	AT1G49280
AT1G49320	ATUSPL1
AT1G49330	AT1G49330
AT1G49430	LACS2
AT1G49435	AT1G49435
AT1G49450	AT1G49450
AT1G49480	REM19
AT1G49500	AT1G49500
AT1G49520	AT1G49520
AT1G49540	ELP2
AT1G49570	PER10
AT1G49580	CRK8
AT1G49600	RBP47A
AT1G49610	AT1G49610
AT1G49620	KRP7
AT1G49640	CXE3
AT1G49650	CXE4
AT1G49660	CXE5
AT1G49730	AT1G49730
AT1G49740	AT1G49740
AT1G49750	AT1G49750
AT1G49760	PAB8
AT1G49770	BHLH95
AT1G49780	PUB26
AT1G49820	MTK
AT1G49830	AT1G49830
[truncated: 11,127 more rows]

## Sheet: FUS3-GR-FLAG_up
ID	name	log2(FUS3-GR-FLAG_DEX/DMSO)	FDR
AT4G27160	2S3	13.4133	0
AT1G03880	CRB	13.2595	3.74e-211
AT4G27150	2S2	12.6694	2.7e-235
AT5G44120	CRA1	11.8244	0
AT5G07550	GRP19	10.9847	2.14e-282
AT2G34870	MEE26	10.9422	6.42e-124
AT2G34700	AT2G34700	10.4087	0
AT1G47540	ATTI7	10.2998	6.56e-147
AT3G21370	BGLU19	10.2263	0
AT4G31970	CYP82C2	9.99636	1.28e-96
AT5G52160	AT5G52160	9.97409	8.4e-96
AT1G28650	AT1G28650	9.91173	2.5e-94
AT4G25140	OLEO1	9.84913	0
AT4G36700	AT4G36700	9.63661	0
AT5G07530	GRP17	9.58491	1.1e-176
AT4G27170	2S4	9.57573	0
AT3G11480	BSMT1	9.36985	1.14e-80
AT5G50360	AT5G50360	9.34644	3.5e-80
AT1G72570	AIL1	9.25631	3.94e-78
AT3G44460	DPBF2	9.19999	8.43e-77
AT2G05580	AT2G05580	9.1532	0
AT1G03890	CRD	9.00884	2.38e-72
AT3G22640	PAP85	8.88581	0
AT1G78500	PEN6	8.83692	4.86e-99
AT1G11370	PME56	8.5612	5.03e-77
AT3G58740	CSY1	8.55718	7.01e-63
AT5G03820	AT5G03820	8.54758	1.34e-62
AT2G23510	SDT	8.47791	2.08e-116
AT3G63040	AT3G63040	8.30076	8.26e-58
AT1G53690	NRPB12L	8.2378	1.28e-56
AT5G05290	EXPA2	8.14933	5.07e-80
AT4G03050	AOP3	8.08877	1.26e-39
AT3G54940	AT3G54940	8.06074	0
AT5G62800	AT5G62800	8.04876	4.35e-53
AT5G40420	OLEO2	8.01929	0
AT3G60120	BGLU27	7.80674	2.51e-71
AT3G48270	CYP71A26	7.77062	6.66e-65
AT5G39110	GLP6	7.63366	0
AT4G34520	FAE1	7.55777	1.53e-44
AT1G54860	AT1G54860	7.50053	1.98e-43
AT5G07540	GRP16	7.4304	1.69e-42
AT2G28490	AT2G28490	7.4208	0
AT1G30795	AT1G30795	7.3806	9.88e-42
AT1G71250	AT1G71250	7.37425	9.37e-81
AT1G70960	AT1G70960	7.35518	2.52e-41
AT4G26740	PXG1	7.31882	4.48e-182
AT1G04660	AT1G04660	7.27837	2.83e-141
AT5G45690	AT5G45690	7.26792	1.44e-63
AT3G29385	AT3G29385	7.10317	1.76e-58
AT2G29470	GSTU3	7.10022	0
AT1G48990	AT1G48990	7.05809	2.41e-54
AT1G75830	PDF1.1	7.03122	8.68e-227
AT1G17810	TIP3-2	7.01947	4.72e-105
AT5G04380	AT5G04380	6.94699	3.25e-85
AT5G50260	CEP1	6.94298	0
AT4G21370	PSEUDOSRKA	6.92153	4.31e-35
AT1G73190	TIP3-1	6.91569	0
AT4G10020	HSD5	6.91007	3.79e-233
AT1G74140	AT1G74140	6.82138	1.23e-33
AT5G55410	AT5G55410	6.75753	4.23e-55
AT1G57800	ORTH3	6.70753	1.55e-124
AT1G25410	IPT6	6.69482	6e-32
AT5G24560	PP2B12	6.64483	3.24e-31
AT1G15520	ABCG40	6.64336	0
AT3G57510	ADPG1	6.56159	3.26e-58
AT5G36970	NHL25	6.53685	1.7e-46
AT3G52780	PAP20	6.51322	4.68e-305
AT4G04990	AT4G04990	6.50689	3.65e-76
AT1G19250	FMO1	6.45458	0
AT5G25180	CYP71B14	6.37795	2.72e-41
AT1G10550	XTH33	6.34971	0
AT5G39160	GLP2A	6.32786	0
AT4G02780	GA1	6.26317	9.63e-213
AT4G21020	AT4G21020	6.25799	7.31e-83
AT5G03795	AT5G03795	6.22546	0
AT3G60140	BGLU30	6.19638	0
AT1G19210	ERF017	6.18392	9.01e-47
AT5G36910	THI2.2	6.18325	0
AT5G07500	PEI1	6.16362	6.53e-169
AT1G33950	AT1G33950	6.14377	2.16e-25
AT5G09640	SCPL19	6.13101	2.69e-60
AT5G56510	APUM12	6.06397	1.92e-125
AT1G22100	AT1G22100	5.99921	8.46e-24
AT2G18540	AT2G18540	5.94311	2.79e-36
AT1G56100	AT1G56100	5.9288	4.46e-23
AT2G40220	ABI4	5.89969	1.12e-22
AT5G46950	AT5G46950	5.88902	1.46e-22
AT1G73220	45931	5.88709	1.43e-163
AT5G46960	AT5G46960	5.88281	3.11e-98
AT5G51210	OLEO3	5.83971	1.38e-39
AT1G05510	AT1G05510	5.83934	5.25e-89
AT3G02840	AT3G02840	5.82217	1.78e-294
AT3G55970	ATJRG21	5.80582	0
AT4G19730	AT4G19730	5.78436	1.34e-21
AT1G63070	AT1G63070	5.77722	1.78e-21
AT1G68510	LBD42	5.76086	2.59e-21
AT5G13170	SWEET15	5.74816	0
AT5G10140	FLC	5.66303	3.31e-176
AT2G15780	AT2G15780	5.656	2.51e-20
AT1G14520	MIOX1	5.65483	0
AT1G67100	LBD40	5.62352	0
AT2G38240	AT2G38240	5.61343	0
AT4G11170	AT4G11170	5.61319	2.67e-142
AT5G14180	LIP2	5.59557	0
AT4G16820	PLA-I{beta]2	5.5879	4.79e-41
AT1G48130	PER1	5.50264	1.85e-222
AT1G11040	AT1G11040	5.49458	8.74e-19
AT5G17810	WOX12	5.47913	1.69e-286
AT4G14368	AT4G14368	5.47247	1.35e-26
AT1G21970	LEC1	5.46972	1.14e-18
AT5G11320	YUC4	5.46372	1.31e-249
AT2G14610	PR1	5.46366	0
AT5G57510	AT5G57510	5.38363	7.19e-87
AT3G56700	FAR6	5.37377	3.34e-20
AT1G66360	AT1G66360	5.37108	4.2e-65
AT4G31830	AT4G31830	5.36896	8.01e-33
AT1G18100	MFT	5.36762	0
AT3G56350	MSD2	5.337	1.35e-78
AT3G05150	AT3G05150	5.33601	0
AT2G44800	AT2G44800	5.33527	2.08e-40
AT2G30750	CYP71A12	5.325	0
AT3G12203	SCPL17	5.31569	1.07e-16
AT1G65385	AT1G65385	5.31169	7.82e-35
AT5G24860	FPF1	5.30147	4.21e-42
AT2G27240	ALMT7	5.28902	4.57e-17
AT1G12064	AT1G12064	5.27904	2.12e-87
AT3G04170	AT3G04170	5.2667	5.81e-17
AT5G22490	AT5G22490	5.24588	2.51e-71
AT1G58260	CYP79C2	5.20801	2.34e-21
AT1G76470	AT1G76470	5.20107	1.47e-69
AT4G29650	CDA4	5.14295	5.61e-30
AT5G26805	AT5G26805	5.12791	7.95e-16
AT1G49570	PER10	5.10414	0
AT4G03450	AT4G03450	5.10331	1.26e-164
AT5G04500	AT5G04500	5.08949	3e-23
AT2G25770	AT2G25770	5.05966	2.58e-21
AT3G55100	ABCG17	5.04992	3.48e-15
AT3G23250	MYB15	5.04632	0
AT1G29680	AT1G29680	5.02974	2.57e-35
AT5G44220	AT5G44220	5.01873	5.76e-15
AT3G28153	AT3G28153	4.99888	4.32e-285
AT5G06760	LEA4-5	4.99401	3.01e-86
AT5G07200	GA20OX3	4.99228	4.85e-130
AT5G44440	AT5G44440	4.97208	5.84e-30
AT1G27040	NPF4.5	4.93316	5.52e-89
AT3G27415	AT3G27415	4.92412	9.39e-36
AT4G18920	AT4G18920	4.89104	4.79e-14
AT5G27370	AT5G27370	4.88952	5.17e-14
AT1G32350	AOX3	4.8734	0
AT2G33070	NSP2	4.85435	3.77e-45
AT3G30580	AT3G30580	4.83731	1.61e-13
AT3G43270	PME32	4.80713	0
AT1G09935	AT1G09935	4.79837	2.43e-13
AT5G03860	MLS	4.78887	0
AT2G30770	CYP71A13	4.78201	0
AT2G38530	LTP2	4.76378	0
AT1G61120	GES	4.75382	0
AT4G10850	SWEET7	4.7488	2.16e-11
AT4G24340	AT4G24340	4.74817	0
AT5G19880	PER58	4.72118	5.29e-51
AT5G42380	CML37	4.68874	4.99e-163
AT5G54740	SESA5	4.67191	1.44e-25
AT2G14290	AT2G14290	4.66124	1.16e-38
AT1G76210	AT1G76210	4.6474	5.08e-26
AT3G01570	AT3G01570	4.64535	2.37e-53
AT3G61930	AT3G61930	4.63983	1.12e-36
AT5G24080	AT5G24080	4.61548	3.41e-12
AT4G10490	AT4G10490	4.59343	6.23e-16
AT1G36441	AT1G36441	4.59295	4.47e-12
AT4G12500	AT4G12500	4.58595	0
AT2G19500	CKX2	4.5763	4.89e-22
AT1G69930	GSTU11	4.57313	4.32e-201
AT2G36640	ATECP63	4.55184	8.08e-86
AT2G46400	WRKY46	4.54835	0
AT5G50770	HSD6	4.54045	3.01e-97
AT1G66700	PXMT1	4.53454	1.41e-165
AT4G01360	AT4G01360	4.5233	2.64e-39
AT1G65090	AT1G65090	4.52147	2.38e-10
AT1G08080	ACA7	4.51186	1.42e-11
AT5G24950	CYP71A15	4.49519	6.37e-16
AT1G68380	AT1G68380	4.49281	2.34e-11
AT1G22015	B3GALT5	4.46137	3.26e-11
AT4G37990	CAD8	4.45957	0
AT1G60090	BGLU4	4.4591	1.05e-75
AT1G67481	MIR839A	4.43903	3.82e-13
AT1G09380	AT1G09380	4.42638	7.98e-241
AT3G27660	OLEO4	4.40971	0
AT1G24580	AT1G24580	4.3933	1.77e-28
AT1G12180	AT1G12180	4.38843	9.57e-11
AT2G29350	SAG13	4.37939	0
AT1G26240	AT1G26240	4.37652	5.31e-15
AT5G24600	AT5G24600	4.37532	0
AT1G07725	ATEXO70H6	4.36773	1.1e-10
AT3G25490	WAKL16	4.35515	1.34e-10
AT2G44070	AT2G44070	4.32481	3.85e-17
AT5G24550	BGLU32	4.32368	2.08e-10
AT2G24000	SCPL22	4.31621	1.02e-19
AT1G23201	AT1G23201	4.30364	2.27e-10
AT2G41225	AT2G41225	4.29652	2.7e-10
AT1G03790	SOM	4.29107	5.95e-29
AT4G31615	REM2	4.291	1.03e-19
AT2G45760	BAP2	4.28211	1.64e-79
AT3G15170	NAC054	4.27925	1.55e-24
AT4G28460	AT4G28460	4.27725	9.02e-25
AT1G13520	AT1G13520	4.26011	1.12e-159
AT5G39580	PER62	4.25891	0
AT1G59950	AT1G59950	4.25256	3.31e-55
AT1G32049	AT1G32049	4.235	1.9e-19
AT3G21320	AT3G21320	4.22777	5.9e-10
AT2G37435	AT2G37435	4.22012	6.7e-10
AT5G02230	AT5G02230	4.1944	0
AT1G74010	AT1G74010	4.1919	0
AT1G26410	AT1G26410	4.16966	1.81e-10
AT2G32830	PHT1-5	4.16645	0
AT2G22760	BHLH19	4.16233	4.61e-31
AT3G52810	PAP21	4.16147	1.39e-09
AT5G40348	AT5G40348	4.15016	3.29e-12
AT3G28150	AXY4L	4.14836	1.8e-223
AT1G20790	AT1G20790	4.14776	1.72e-09
AT4G18680	AT4G18680	4.13504	2.12e-09
AT3G58060	MTPC3	4.12761	2.73e-160
AT5G56970	CKX3	4.08732	7.93e-89
AT4G22050	AT4G22050	4.08703	1.72e-08
AT2G41850	ADPG2	4.08613	3.36e-92
AT2G26010	PDF1.3	4.08368	1.27e-120
AT2G26020	PDF1.2B	4.07503	8.49e-154
AT5G13080	WRKY75	4.07091	1.57e-218
AT1G77950	AGL67	4.07032	2.11e-16
AT5G38900	AT5G38900	4.05244	0
AT1G30370	AT1G30370	4.04692	1.27e-253
AT5G43650	BHLH92	4.04335	6.22e-29
AT3G07250	AT3G07250	4.04136	1.43e-15
AT3G24650	ABI3	4.03696	6.66e-10
AT1G27461	AT1G27461	4.0332	2.84e-09
AT2G04500	AT2G04500	4.02102	1.21e-63
AT3G27025	AT3G27025	4.02011	1.14e-34
AT4G21840	MSRB8	4.01585	0
AT4G15396	CYP702A6	4.01325	4.46e-282
AT4G31660	REM7	4.00964	8.95e-09
AT5G64870	FLOT3	4.00911	1.47e-273
AT5G39100	GLP6	4.00819	3.76e-11
AT4G21830	MSRB7	4.00469	0
AT2G41360	AT2G41360	4.00252	9.82e-09
AT4G32630	AT4G32630	3.99544	8.07e-12
AT1G80160	AT1G80160	3.96669	8.4e-176
AT4G16550	AT4G16550	3.9658	1.35e-08
AT5G55240	PXG2	3.96343	6.55e-09
AT4G31900	PKR2	3.95589	6.64e-19
AT1G70390	AT1G70390	3.95479	6.86e-37
AT3G48850	MPT2	3.95355	3.38e-291
AT4G25810	XTH23	3.95187	0
AT1G70270	AT1G70270	3.9475	1.24e-97
AT4G25980	PER43	3.93719	4.6e-25
AT1G78390	NCED9	3.93564	1.56e-13
AT5G03210	AT5G03210	3.90975	1.61e-101
AT1G05100	MAPKKK18	3.89994	7.75e-94
AT1G32890	AT1G32890	3.89351	2.9e-08
AT1G02770	AT1G02770	3.87825	3.66e-184
AT3G20210	dVPE	3.87512	1.65e-30
AT2G47780	AT2G47780	3.87403	1.77e-248
AT1G21850	sks8	3.86626	2.6e-09
AT5G01380	GT-3A	3.86516	6.87e-83
AT1G47990	GA2OX4	3.86216	1.99e-63
AT5G22570	WRKY38	3.86127	1.04e-78
AT2G24010	scpl23	3.85724	2.55e-151
AT2G23180	CYP96A1	3.85339	0
AT3G46070	AT3G46070	3.85228	4.95e-08
AT1G28480	GRXC9	3.84704	2.31e-208
AT1G03106	AT1G03106	3.84441	2.92e-36
AT2G02990	RNS1	3.84149	0
AT1G10680	ABCB10	3.83371	9.02e-17
AT5G19890	PER59	3.82019	0
AT4G12735	AT4G12735	3.8068	8.87e-61
AT1G53990	GLIP3	3.80662	5.92e-142
AT5G07210	ARR21	3.78927	9.28e-08
AT2G21490	LEA	3.77224	1.01e-07
AT4G30280	XTH18	3.76213	0
AT5G17350	AT5G17350	3.76006	1.71e-230
AT5G57550	XTH25	3.74764	7.09e-208
AT2G04495	AT2G04495	3.73748	2.7e-26
AT1G29100	AT1G29100	3.72967	3.12e-07
AT1G62760	AT1G62760	3.72612	2.26e-291
AT1G49330	AT1G49330	3.71828	1.68e-21
AT5G61610	AT5G61610	3.71719	1.46e-235
AT1G70380	AT1G70380	3.71407	2.07e-11
AT2G31625	AT2G31625	3.70862	1.84e-07
AT1G30220	INT2	3.70526	4.1e-148
AT2G22180	AT2G22180	3.70011	4.04e-15
AT5G64905	PEP3	3.68799	7.61e-30
AT3G02410	ICMEL2	3.68635	2.22e-62
AT2G30432	TCL1	3.6858	6.03e-79
AT2G14620	XTH10	3.67823	1.07e-141
AT2G13810	ALD1	3.67379	2.13e-11
AT5G40590	AT5G40590	3.66776	9.66e-83
AT1G52565	AT1G52565	3.66217	1.72e-118
AT3G25795	AT3G25795	3.65776	6.39e-53
AT1G60970	AT1G60970	3.65487	5.55e-87
AT1G29290	AT1G29290	3.64772	1.16e-111
AT4G37370	CYP81D8	3.64505	0
AT4G11040	RDO5	3.64498	2.46e-07
AT2G32370	HDG3	3.64245	3.69e-07
AT3G11260	WOX5	3.63925	2.07e-19
AT1G50750	AT1G50750	3.63772	1.6e-198
AT1G69880	TRX8	3.6356	0
AT2G31345	AT2G31345	3.62797	4.68e-07
AT3G29030	EXPA5	3.6229	0
AT2G34202	MIR399D	3.61908	7.45e-36
AT5G55360	AT3	3.60622	7.72e-12
AT1G67856	AT1G67856	3.60097	1.04e-13
AT1G45616	AtRLP6	3.59998	3.48e-145
AT2G22750	BHLH18	3.59354	1.81e-19
AT3G60966	AT3G60966	3.58673	2.96e-32
AT2G31690	AT2G31690	3.58027	1.47e-08
AT3G54510	AT3G54510	3.57997	1.91e-55
AT4G27140	2S1	3.57785	1.36e-06
AT3G09400	PLL3	3.56095	1.71e-13
AT2G41230	ORS1	3.56016	0
AT5G12020	HSP17.6	3.55306	5.8e-63
AT3G28415	ABCB22	3.5498	8.29e-12
AT5G56368	AT5G56368	3.54626	3.46e-13
AT3G26820	AT3G26820	3.53717	2.1e-27
AT2G33020	AtRLP24	3.53221	1.62e-33
AT1G07645	ATDSI-1VOC	3.53114	2.68e-10
AT1G57630	AT1G57630	3.531	1.11e-51
AT1G48470	GLN1-5	3.52725	0
AT2G28610	WOX3	3.52123	2.79e-18
AT5G22460	AT5G22460	3.51323	2.35e-242
AT3G45130	LAS1	3.51221	6.2e-178
AT1G18970	GLP1	3.50664	2.81e-208
AT3G22910	ACA13	3.50627	2.1e-158
AT3G03540	NPC5	3.50251	9.29e-08
AT3G50770	CML41	3.49658	6.52e-116
AT5G07190	ATS3	3.49296	1.08e-78
AT2G30115	AT2G30115	3.48273	1.56e-06
AT1G08440	ALMT2	3.48189	7.97e-11
AT5G45890	SAG12	3.48144	1.39e-06
AT5G61890	ERF114	3.47576	3.6e-55
AT1G12610	DREB1F	3.47349	3.34e-26
AT3G15670	AT3G15670	3.47148	1.5e-19
AT1G61800	GPT2	3.46848	0
AT1G69180	CRC	3.46272	1.63e-06
AT3G61190	BAP1	3.45902	0
AT3G60730	PME36	3.45619	1.17e-26
AT5G49620	MYB78	3.45454	5.85e-33
AT1G19020	AT1G19020	3.45417	1.16e-297
AT1G44941	AT1G44941	3.4399	1.98e-06
AT5G40900	AT5G40900	3.4352	4.4e-08
AT5G57123	AT5G57123	3.4324	1.15e-33
AT3G10930	AT3G10930	3.42924	1.33e-273
AT5G64810	WRKY51	3.42464	9.18e-72
AT1G15610	AT1G15610	3.41379	2.49e-06
AT2G43050	PME16	3.40849	6.31e-89
AT2G32210	AT2G32210	3.40262	7.64e-132
AT3G54150	AT3G54150	3.39817	1.27e-235
AT1G62710	bVPE	3.38853	0
AT2G25940	ALPHA-VPE	3.37326	2.58e-213
AT3G15370	EXPA12	3.3693	3.9e-26
AT5G62520	SRO5	3.3665	0
AT5G07330	AT5G07330	3.3649	7.45e-14
AT1G61550	AT1G61550	3.3647	1.11e-83
AT2G03360	AT2G03360	3.36277	3.27e-22
AT4G23600	CORI3	3.35685	0
AT4G39130	AT4G39130	3.35624	3.94e-06
AT1G61110	NAC025	3.35367	1.17e-07
AT5G44430	PDF1.2C	3.35074	1.32e-133
AT2G38905	AT2G38905	3.35018	4.1e-06
AT3G46230	HSP17.4A	3.34522	3.19e-83
AT1G66600	WRKY63	3.34192	2.38e-23
AT3G44830	PDAT2	3.34094	5.93e-21
AT1G59670	GSTU15	3.33371	7.12e-12
AT3G28580	AT3G28580	3.33033	3.5e-186
AT1G18300	NUDT4	3.3243	0
AT5G53870	ENODL1	3.31923	5.51e-129
AT1G47510	AT5PTASE11	3.31886	9.16e-64
AT1G70720	AT1G70720	3.30383	1.68e-21
AT4G04460	APA3	3.30038	0
AT4G29780	AT4G29780	3.29625	0
AT5G64530	ANAC104	3.29464	8.39e-70
AT5G42930	AT5G42930	3.29444	1.1e-79
AT1G42560	MLO9	3.29408	2.43e-18
AT1G29090	AT1G29090	3.29108	5.76e-32
AT3G13433	AT3G13433	3.28994	4.01e-07
AT2G21780	AT2G21780	3.28872	2.5e-07
AT1G71140	AT1G71140	3.28098	0
AT5G52400	CYP715A1	3.27482	4.97e-07
AT3G25655	IDL1	3.27451	5.9e-18
AT1G32940	SBT3.5	3.27236	1.63e-300
AT3G61910	NAC066	3.26966	1.39e-10
AT3G13130	AT3G13130	3.26377	6.6e-28
AT2G02320	PP2B7	3.25587	9.09e-06
AT1G20310	AT1G20310	3.25375	5.94e-50
AT1G54020	AT1G54020	3.23918	8e-168
AT2G38250	GT-3B	3.23604	6.97e-145
AT5G37730	AT5G37730	3.23258	3.24e-08
AT3G46680	UGT76E6	3.23022	1.27e-17
AT5G59820	ZAT12	3.22776	0
AT2G24850	TAT3	3.22549	0
AT3G21500	DXPS1	3.2168	0
AT5G66170	STR18	3.21623	0
AT1G48910	YUC10	3.21523	1.23e-05
AT2G25460	AT2G25460	3.21395	2.96e-157
AT1G19968	AT1G19968	3.21335	3.42e-08
AT5G56300	GAMT2	3.2103	1.34e-20
AT1G11170	AT1G11170	3.21016	0
AT1G48000	MYB112	3.20719	7.01e-55
AT4G32810	CCD8	3.20701	9.49e-191
AT5G01900	WRKY62	3.20649	3.46e-09
AT2G35300	LEA18	3.20409	1.34e-19
AT3G30180	CYP85A2	3.19645	0
AT2G37430	ZAT11	3.19577	8.07e-56
AT4G04500	CRK37	3.1948	8.64e-10
AT4G11655	AT4G11655	3.19354	1.76e-32
AT2G40790	CXXS2	3.1886	2.12e-26
AT3G50930	BCS1	3.18731	0
AT1G58420	AT1G58420	3.18648	9.38e-57
AT3G29260	SDR5	3.18647	1.5e-05
AT2G38340	DREB2E	3.18644	5.66e-27
AT3G04300	AT3G04300	3.1835	4.72e-54
AT1G30100	NCED5	3.17758	8.56e-08
AT4G23215	AT4G23215	3.17287	1.99e-30
AT1G26420	AT1G26420	3.16556	1.69e-77
AT2G21930	AT2G21930	3.16118	5.63e-25
AT1G60190	PUB19	3.15751	2.42e-31
AT5G05300	AT5G05300	3.15741	1.12e-22
AT3G53232	RTFL1	3.15516	2.18e-47
AT4G29620	CDA2	3.14896	1.91e-05
AT1G08860	BON3	3.14358	2.55e-11
AT3G25250	OXI1	3.14336	1.01e-126
AT1G68620	CXE6	3.13812	3.68e-123
AT3G21720	ICL	3.13154	0
AT1G62450	AT1G62450	3.13004	2.22e-05
AT2G37025	TRFL8	3.12988	9.3e-113
AT3G28340	GATL10	3.12902	0
AT4G04490	CRK36	3.12436	1.74e-84
AT3G09520	ATEXO70H4	3.12418	8.69e-68
AT1G53625	AT1G53625	3.11884	6.68e-47
AT2G32460	MYB101	3.11786	1.33e-05
AT3G46120	PAP19	3.1161	3.06e-06
AT2G22880	AT2G22880	3.11598	5.17e-71
AT1G61340	AT1G61340	3.1131	9.67e-272
AT1G05680	UGT74E2	3.10989	1.43e-186
AT4G33420	PER47	3.10337	0
AT4G04510	CRK38	3.09477	3.35e-09
AT2G15760	AT2G15760	3.08512	7.31e-114
AT3G22250	UGT82A1	3.08164	7.85e-34
AT1G28375	AT1G28375	3.07816	3.27e-05
AT5G22540	AT5G22540	3.07639	1.29e-12
AT3G48640	AT3G48640	3.0743	5.82e-08
AT5G07510	GRP14	3.06477	4.47e-05
AT2G41010	CAMBP25	3.06415	2.12e-254
AT1G30700	AT1G30700	3.06215	9.41e-281
AT2G41280	M10	3.06146	3.48e-05
AT5G55750	AT5G55750	3.06063	3.21e-06
AT1G66380	MYB114	3.04922	6.3e-10
AT5G55250	IAMT1	3.03968	4.37e-200
AT1G72240	AT1G72240	3.03353	1.74e-32
AT5G13790	AGL15	3.02891	1.07e-205
AT1G52690	AT1G52690	3.02679	2.27e-28
AT5G65100	EIL5	3.02599	4.71e-05
AT4G27810	AT4G27810	3.02018	3.16e-33
AT5G43570	AT5G43570	3.0157	1.71e-21
AT1G56150	SAUR71	3.01278	2.05e-62
AT2G06660	AT2G06660	3.0105	5.24e-05
AT1G63210	AT1G63210	3.00868	5.17e-05
AT4G31760	PER46	3.00856	1e-08
AT3G14360	AT3G14360	3.00676	0
AT1G73805	SARD1	3.00573	6.74e-218
AT3G26830	CYP71B15	3.00277	0
AT1G75750	GASA1	2.99538	9.55e-132
AT4G18690	AT4G18690	2.99321	5.7e-05
AT4G30290	XTH19	2.99049	0
AT2G42990	AT2G42990	2.98956	1.21e-12
AT2G47050	AT2G47050	2.98007	1.59e-16
AT3G57260	BG2	2.97564	3.97e-233
AT1G22810	ERF019	2.9733	6.25e-07
AT5G25470	AT5G25470	2.97267	2.49e-42
AT5G63087	AT5G63087	2.97219	2.75e-13
AT1G02930	GSTF6	2.96376	0
AT3G58780	AGL1	2.95293	4.63e-50
AT1G04250	IAA17	2.95132	0
AT4G21680	NPF7.2	2.95001	0
AT1G66370	MYB113	2.94038	2.16e-20
AT3G10815	AT3G10815	2.93579	7.08e-58
AT2G02340	PP2B8	2.93577	2.63e-05
AT5G07310	ERF115	2.92919	6e-14
AT1G68765	IDA	2.92683	1.06e-11
AT5G45830	DOG1	2.92437	7.69e-137
AT1G61810	BGLU45	2.92395	4.24e-54
AT1G06080	ADS1	2.92017	2.37e-212
AT1G52890	NAC019	2.91333	6.22e-217
AT4G26440	WRKY34	2.91243	1.16e-05
AT5G59170	AT5G59170	2.91094	3.85e-25
AT2G46770	NAC043	2.90452	9.44e-11
AT1G02230	NAC004	2.89696	6.7e-19
AT1G26560	BGLU40	2.89511	0
AT4G28190	ULT1	2.89353	2.62e-204
AT3G29252	AT3G29252	2.88879	1.04e-05
AT2G27080	AT2G27080	2.88829	0
AT3G51560	AT3G51560	2.88766	1.29e-17
AT2G25150	SCT	2.88211	5.77e-40
AT5G38750	AT5G38750	2.872	1.42e-19
AT3G29000	CML30	2.86953	8.34e-135
AT1G80580	ERF084	2.86728	0.000119222
AT4G33720	AT4G33720	2.86324	0
AT1G02850	BGLU11	2.85899	0
AT5G22810	AT5G22810	2.85826	4.19e-09
AT1G13340	AT1G13340	2.8579	7.04e-240
AT5G64190	AT5G64190	2.85471	2.51e-50
AT1G21525	AT1G21525	2.84675	7.47e-26
AT4G10250	HSP22.0	2.84488	1.87e-26
AT4G09820	TT8	2.83793	7.37e-89
AT5G51790	BHLH120	2.83788	3.87e-60
AT5G59680	AT5G59680	2.82443	8.68e-98
AT1G30730	AT1G30730	2.82179	1.81e-117
AT4G02360	AT4G02360	2.82106	1.99e-67
AT2G22860	PSK2	2.81984	2.23e-104
AT1G26380	AT1G26380	2.81879	1.6e-87
AT4G23560	AtGH9B15	2.81845	1.66e-07
AT4G12470	AZI1	2.81246	0
AT2G33580	LYK5	2.80958	7.27e-267
AT1G05880	ARI12	2.80852	5.96e-05
AT2G47520	ERF071	2.80769	7.53e-216
AT4G04760	AT4G04760	2.80612	8.04e-53
AT2G28860	CYP710A4	2.80607	8.27e-44
AT5G17340	AT5G17340	2.80553	6.64e-60
AT4G05030	AT4G05030	2.79993	0.000193997
AT5G65165	SDH2-3	2.79551	5.26e-15
AT5G24355	AT5G24355	2.79471	0.000150146
AT1G66390	MYB90	2.78879	4.83e-53
AT1G77655	AT1G77655	2.78446	1.22e-05
AT5G65510	AIL7	2.77963	1.98e-94
AT1G63820	AT1G63820	2.77457	9.71e-52
AT5G52640	HSP81-1	2.77187	0
AT3G21090	ABCG15	2.75344	2.79e-183
AT1G66400	CML23	2.75224	1.55e-108
AT5G13330	ERF113	2.75103	1.22e-173
AT1G02310	MAN1	2.74987	2.32e-39
AT2G36770	UGT73C4	2.74971	4.74e-104
AT2G44840	ERF13	2.74733	1.5e-157
AT5G45630	AT5G45630	2.74302	1.3e-36
AT5G46350	WRKY8	2.7362	1.94e-38
AT2G42430	LBD16	2.72652	4.33e-82
AT2G43000	JUB1	2.72478	1.28e-43
AT3G21520	DMP1	2.72336	1.48e-54
AT1G21360	GLTP2	2.7178	1e-50
AT1G80840	WRKY40	2.71186	0
AT2G28210	ATACA2	2.70653	6.22e-48
AT4G16563	AT4G16563	2.70201	6.11e-234
AT3G23460	AT3G23460	2.70073	1.23e-06
AT2G46660	CYP78A6	2.69417	2.57e-70
AT4G15280	UGT71B5	2.69227	3.65e-45
AT5G65230	AtMYB53	2.68467	1.49e-29
AT1G47400	AT1G47400	2.68464	2.46e-46
AT3G56790	AT3G56790	2.68368	2.62e-08
AT4G37720	PSK4	2.66837	0.000416122
AT4G02330	PME41	2.66292	0
AT3G59710	AT3G59710	2.65696	1.85e-134
AT1G48800	TPS28	2.64809	1.18e-10
AT3G18250	AT3G18250	2.64703	1.73e-14
AT2G32200	AT2G32200	2.64356	1.81e-23
AT1G20132	AT1G20132	2.64285	0.000478964
AT4G16740	TPS03	2.63844	3.65e-22
AT5G18450	DREB2G	2.63656	0.000495776
AT4G27652	AT4G27652	2.63637	9.4e-96
AT3G46660	UGT76E12	2.63129	0.000524292
AT5G38540	JAL43	2.62966	5.65e-69
AT1G66160	PUB20	2.62956	2.02e-294
AT2G44460	BGLU28	2.62317	0
AT5G64890	PEP2	2.6204	1.8e-16
AT5G47550	CYS5	2.62018	2.6e-247
AT2G14560	LURP1	2.61891	0
AT1G04490	AT1G04490	2.61433	3.1e-35
AT5G09970	CYP78A7	2.60979	2.4e-29
AT5G05365	AT5G05365	2.60957	3.17e-87
AT5G57390	AIL5	2.60673	3.84e-83
AT1G33730	CYP76C5	2.6044	4.74e-05
AT1G65970	PRXIIC	2.60231	2.31e-188
AT1G68390	AT1G68390	2.60217	3.63e-55
AT1G12070	AT1G12070	2.60181	1.49e-16
AT1G30190	AT1G30190	2.60139	8.63e-08
AT2G23170	GH3.3	2.60099	4.54e-43
AT4G18650	AT4G18650	2.59851	0.000609451
AT3G11150	AT3G11150	2.59746	4.04e-45
AT3G03230	AT3G03230	2.59389	0.000248262
AT1G13755	AT1G13755	2.59296	0.000627966
AT2G01770	VIT1	2.59219	0.00019804
AT3G44320	NIT3	2.59182	0
AT3G12220	SCPL16	2.59176	1.18e-22
AT4G23060	IQD22	2.5888	7.44e-148
AT2G31420	AT2G31420	2.58772	2.3e-06
AT1G54570	AT1G54570	2.58615	0
AT3G26200	CYP71B22	2.58356	0
AT1G77640	ERF013	2.58291	1.04e-78
AT3G13437	AT3G13437	2.58202	2.2e-43
AT5G51760	AHG1	2.58189	2.88e-06
AT3G14362	DVL19	2.58049	1.14e-28
AT4G31000	CBP60F	2.58008	0
AT2G44470	BGLU29	2.57849	0.000691859
AT5G12340	AT5G12340	2.57807	1.88e-51
AT1G80130	AT1G80130	2.5762	0
AT2G24800	PER18	2.57303	4.59e-13
AT5G09980	PEP4	2.57212	9.85e-92
AT3G21352	AT3G21352	2.56941	1.19e-10
AT2G35730	AT2G35730	2.56445	2.91e-25
AT2G14960	GH3.1	2.5599	1.47e-26
AT1G68240	BHLH109	2.55938	3.87e-15
AT1G75450	CKX5	2.55822	2.54e-87
AT4G39670	AT4G39670	2.55186	7.96e-62
AT2G36695	AT2G36695	2.55166	9.76e-07
AT1G28370	ERF11	2.54985	2.8e-167
AT3G19500	BHLH113	2.54906	5.17e-35
AT5G01100	AT5G01100	2.54749	1.35e-50
AT1G53980	AT1G53980	2.54671	6.24e-08
AT1G71890	SUC5	2.54397	3.94e-53
AT3G12830	SAUR72	2.53597	6.86e-103
AT1G18350	MKK7	2.53316	6.7e-12
AT2G36220	AT2G36220	2.52731	5.62e-226
AT2G30020	AT2G30020	2.5232	0
AT3G12580	MED37C	2.52163	0
AT1G66500	PCFS1	2.51935	2.01e-141
AT4G10265	AT4G10265	2.51648	4.7e-36
AT1G60730	AT1G60730	2.51232	0
AT5G64080	AT5G64080	2.51181	0
AT1G19900	AT1G19900	2.50823	6.08e-79
AT4G28530	anac074	2.50111	9.25e-24
AT5G44700	GSO2	2.50044	2.63e-34
AT3G59260	AT3G59260	2.49968	0.00102246
AT2G26692	AT2G26692	2.48678	8.7e-06
AT5G44350	AT5G44350	2.47881	6.83e-65
AT1G80590	WRKY66	2.47632	0.00115119
AT2G38490	CIPK22	2.47578	5.35e-11
AT4G14370	AT4G14370	2.47458	4.97e-116
AT4G31950	CYP82C3	2.47425	0.000341738
AT1G58330	ZW2	2.47107	8.1e-07
AT5G42530	AT5G42530	2.47039	2.34e-278
AT5G18270	ANAC087	2.47033	2.95e-240
AT5G62480	GSTU9	2.46763	5.03e-115
AT4G34320	AT4G34320	2.46205	5.12e-35
AT2G20142	AT2G20142	2.45793	1.64e-97
AT4G03290	CML6	2.45663	0.00126969
AT4G39700	AT4G39700	2.45389	6.29e-28
AT3G56275	AT3G56275	2.44943	1.69e-17
AT5G65300	AT5G65300	2.44863	1.71e-39
AT5G44460	CML43	2.44147	9.42e-71
AT4G12210	AT4G12210	2.43361	0.00142002
AT5G64750	ABR1	2.43281	1.31e-12
AT1G14630	AT1G14630	2.42973	6.22e-69
AT3G28770	AT3G28770	2.42792	1.9e-17
AT2G17470	ALMT6	2.42563	5.02e-30
AT2G43530	ATTI3	2.42412	3.93e-73
AT1G68568	AT1G68568	2.42364	0.000348836
AT2G19770	PRO4	2.42198	0.000552882
AT1G56250	VBF	2.4214	4.37e-36
AT1G44090	GA20OX5	2.41503	0.000746344
AT1G69430	AT1G69430	2.41501	4.36e-19
AT1G79680	WAKL10	2.41384	1.7e-37
AT1G62420	AT1G62420	2.4137	5.5e-26
AT3G48520	CYP94B3	2.41259	2.72e-66
AT4G18425	AT4G18425	2.40735	3.46e-57
AT3G48650	AT3G48650	2.40599	3.36e-30
AT1G63030	DREB1E	2.40597	0.00162738
AT4G28365	ENODL3	2.40496	0.000140857
AT2G33520	AT2G33520	2.40108	6.57e-07
AT1G26730	PHO1-H7	2.40085	1.16e-129
AT5G66700	ATHB-53	2.39801	1.88e-14
AT3G49130	AT3G49130	2.39771	1.21e-06
AT3G21351	AT3G21351	2.39598	1.16e-81
AT5G24130	AT5G24130	2.39549	0.00170973
AT2G41070	DPBF4	2.39128	4.88e-210
AT5G49520	WRKY48	2.39086	3.98e-143
AT5G19110	AT5G19110	2.38955	2.95e-221
AT4G30140	CDEF1	2.38503	0
AT3G15740	AT3G15740	2.37876	0.00144316
AT1G15040	AT1G15040	2.37797	0
AT5G61160	ACT	2.37218	1.52e-145
AT5G14860	AT5G14860	2.36509	0.0011055
AT1G74000	SSL11	2.36437	1.18e-68
AT1G05550	AT1G05550	2.3612	0.000105934
AT5G44630	BS	2.35661	0.00205755
AT1G80390	IAA15	2.35508	0.0010782
AT3G46613	RTFL4	2.35444	0.00207817
AT5G16460	AT5G16460	2.35173	0.0021051
AT4G15975	ATL17	2.34647	1.19e-85
AT2G17330	CYP51G2	2.34532	1.69e-26
AT1G01480	ACS2	2.34402	1.93e-21
AT3G51860	CAX3	2.34329	0
AT3G49380	iqd15	2.34314	9.24e-17
AT1G10220	AT1G10220	2.34136	3.52e-08
AT4G15755	AT4G15755	2.33817	0.00209741
AT5G54300	AT5G54300	2.3376	1.85e-171
AT1G21250	WAK1	2.33546	0
AT2G15765	AT2G15765	2.33486	0.00227587
AT5G03668	AT5G03668	2.33214	5.85e-07
AT1G68450	VQ8	2.33026	7.91e-17
AT1G64070	RLM1	2.32786	0.00119995
AT2G26130	AT2G26130	2.32372	0.00182563
AT1G62580	AT1G62580	2.32313	4.85e-43
AT3G02800	AT3G02800	2.32257	2.29e-40
AT5G20045	AT5G20045	2.3208	7.44e-16
AT5G55620	AT5G55620	2.32073	5.9e-233
AT3G49340	AT3G49340	2.32027	0.000479796
AT5G39670	CML45	2.31988	3.18e-89
AT2G27389	AT2G27389	2.31706	9.15e-25
AT3G25780	AOC3	2.31306	0
AT5G42830	AT5G42830	2.31149	2.14e-93
AT5G25930	AT5G25930	2.31089	8.18e-224
AT2G34650	PID	2.30973	2.2e-76
AT3G49120	PER34	2.30716	0
AT1G05800	DGL	2.30699	0.00136253
AT4G18210	PUP10	2.30466	2.28e-105
AT1G56040	PUB58	2.30274	0.00263742
AT1G68170	AT1G68170	2.30214	3.03e-06
AT5G18470	AT5G18470	2.30189	1.23e-175
AT2G18210	AT2G18210	2.29995	2.48e-61
AT2G45080	CYCU2-1	2.29787	2.24e-39
AT3G45660	NPF2.6	2.29614	2.11e-22
AT4G37850	BHLH25	2.29451	1.06e-35
AT3G23240	ERF1B	2.29115	3.71e-42
AT4G16730	TPS02	2.2905	0.00278311
AT4G25490	DREB1B	2.29003	2.1e-08
AT4G15210	BAM5	2.28911	0
AT4G30540	AT4G30540	2.28828	0.00281894
AT3G44350	NAC061	2.28322	4.84e-05
AT1G62530	AT1G62530	2.27965	8.1e-06
AT3G47480	CML47	2.27573	8.98e-55
AT4G22880	LDOX	2.27541	8.51e-184
AT4G31877	MIR156C	2.27316	6.39e-23
AT5G65550	UGT91B1	2.27148	2.31e-06
AT1G09960	SUC4	2.27059	2.34e-255
AT4G11650	OSM34	2.26096	0
AT3G09940	MDHAR	2.25996	0
AT3G05020	ACP1	2.25848	0
AT5G10120	EIL4	2.25677	0.00314757
AT1G72540	AT1G72540	2.25653	9.83e-27
AT2G29930	AT2G29930	2.2509	0.00333328
AT3G28600	AT3G28600	2.24951	7.47e-09
AT2G22500	PUMP5	2.24914	0
AT3G09010	AT3G09010	2.2465	1.94e-70
AT3G13640	ABCE1	2.24528	1.46e-24
AT3G05770	AT3G05770	2.24217	2.37e-14
AT2G47600	MHX	2.24125	0
AT5G37540	AT5G37540	2.23914	5.91e-154
AT1G62290	APA2	2.2389	0
AT5G16980	AT5G16980	2.23549	2.09e-200
AT1G30660	T5I8.11	2.23255	3.98e-11
AT1G06520	GPAT1	2.23072	2.95e-29
AT2G31180	ATMYB14	2.23054	3.75e-29
AT1G32710	AT1G32710	2.22833	0.00367709
AT3G20940	CYP705A30	2.22809	1.05e-146
AT3G59930	AT3G59930	2.22481	4.56e-55
AT3G60170	AT3G60170	2.22349	2.51e-22
AT4G01985	AT4G01985	2.2175	7.07e-26
AT1G14540	PER4	2.21114	2.31e-15
AT1G08165	AT1G08165	2.20996	1.69e-29
AT1G35140	EXL1	2.20989	0
AT4G02520	GSTF2	2.2075	0
AT4G16620	AT4G16620	2.20658	4.14e-32
AT2G05940	AT2G05940	2.20441	3.29e-300
AT1G67770	TEL2	2.19882	0.000942427
AT3G06435	AT3G06435	2.19837	3.7e-111
AT1G69150	AT1G69150	2.19724	6.51e-08
AT1G17830	AT1G17830	2.19654	7.82e-172
AT4G08870	ARGAH2	2.19572	0
AT5G64120	PER71	2.19506	0
AT3G03670	PER28	2.19502	1.73e-05
AT5G47670	NFYB6	2.19289	0.000369723
AT3G14260	AT3G14260	2.19238	3.85e-32
AT5G55050	AT5G55050	2.19122	4.74e-154
AT2G30470	VAL1	2.18795	0
AT5G13220	TIFY9	2.1867	4.26e-202
AT1G64710	AT1G64710	2.18589	0
AT1G16360	ALIS4	2.18373	1.64e-12
AT3G27490	AT3G27490	2.1832	2.44e-05
AT3G05320	AT3G05320	2.18266	1.61e-164
AT1G26590	AT1G26590	2.18031	1.02e-10
AT5G22580	AT5G22580	2.17901	3.26e-50
AT1G07260	UGT71C3	2.17887	1.44e-139
AT3G54410	AT3G54410	2.17842	0.000620172
AT5G43520	AT5G43520	2.17517	3.34e-24
AT5G38790	AT5G38790	2.17296	6.23e-13
AT5G25820	AT5G25820	2.17219	4.87e-149
AT1G35513	AT1G35513	2.17128	1.42e-18
AT2G35930	PUB23	2.16859	2.93e-101
AT1G16510	SAUR41	2.168	9.18e-28
AT3G28610	AT3G28610	2.1655	0.00418605
AT2G45360	AT2G45360	2.16403	4.92e-20
AT2G22470	AGP2	2.16396	0
AT3G03910	GSH3	2.16354	6.09e-10
AT5G22300	NIT4	2.16339	4.76e-97
AT5G01732	AT5G01732	2.1561	3.31e-26
AT4G16260	AT4G16260	2.15324	0
AT3G28160	AT3G28160	2.15052	2.66e-276
AT1G35333	AT1G35333	2.14842	0.0051818
AT4G29305	LCR25	2.14692	0.000325136
AT5G09440	EXL4	2.14656	0
AT1G67360	AT1G67360	2.14239	0
AT5G21960	ERF016	2.14097	2.71e-19
AT1G64660	MGL	2.14059	6.56e-152
AT4G17980	anac071	2.13863	1.96e-07
AT3G59010	PME35	2.13837	2.1e-74
AT1G28660	AT1G28660	2.13736	0
AT1G58225	AT1G58225	2.13633	2.94e-05
AT3G23730	XTH16	2.13455	0
AT3G45970	EXLA1	2.13429	1.12e-280
AT4G34410	ERF109	2.13375	1.95e-92
AT3G50200	AT3G50200	2.13206	1e-08
AT1G74310	CLPB1	2.13159	0
AT4G01760	AT4G01760	2.12857	0.000245747
AT3G11415	AT3G11415	2.12749	0.000458352
AT5G22250	CAF1-11	2.12682	3.31e-153
AT1G55020	LOX1	2.12554	0
AT4G33150	LKR/SDH	2.1216	0
AT1G54575	AT1G54575	2.11983	5.44e-207
AT4G27260	GH3.5	2.11781	6.8e-285
AT2G45135	AT2G45135	2.11758	2.43e-85
AT4G32500	AKT5	2.11597	5.68e-06
AT5G51190	ERF105	2.11401	1.7e-271
AT2G16005	AT2G16005	2.1112	4.79e-25
AT5G14400	CYP724A1	2.11072	0.0056939
AT1G44830	ERF014	2.11061	8.77e-31
AT4G37520	PER50	2.10885	0
AT5G10695	AT5G10695	2.10504	3.58e-96
AT5G17430	BBM	2.10309	5.28e-20
AT1G61260	AT1G61260	2.10206	3.62e-86
AT4G27460	CBSX5	2.10152	4.16e-25
AT1G52343	AT1G52343	2.09879	4.06e-08
AT5G44480	DUR	2.09522	1.54e-126
AT4G19810	AT4G19810	2.08939	1.46e-282
AT4G01610	AT4G01610	2.08929	0
AT4G30975	AT4G30975	2.08863	2.21e-15
AT3G30725	GDU6	2.08813	7.31e-18
AT1G65690	AT1G65690	2.08461	2.7e-107
AT5G26770	AT5G26770	2.08452	5.4e-89
AT3G21860	ASK10	2.08396	1.79e-07
AT4G25470	DREB1C	2.08224	1.5e-20
AT1G09930	OPT2	2.08221	0.0017106
AT2G35550	BPC7	2.08195	3.54e-24
AT5G45110	NPR3	2.07917	0
AT4G20830	AT4G20830	2.07908	0
AT5G09470	PUMP6	2.0788	4.12e-83
AT5G47960	RABA4C	2.07761	1.5e-49
AT5G27420	ATL31	2.07431	1.5e-226
AT5G04310	AT5G04310	2.0718	2.69e-99
AT1G77100	PER13	2.0717	0.00720662
AT1G22210	TPPC	2.07133	0.00129505
AT3G04190	AT3G04190	2.06703	0.00722072
AT5G63350	AT5G63350	2.06524	3.93e-09
AT1G30920	AT1G30920	2.06412	0.00727514
AT1G78410	VQ10	2.06272	1.94e-31
AT5G45340	CYP707A3	2.06182	1.53e-153
AT5G25440	AT5G25440	2.06158	2.51e-73
AT2G44798	AT2G44798	2.06076	1.43e-29
AT3G45010	SCPL48	2.05722	0
AT3G25882	NIMIN-2	2.05693	4.32e-34
AT4G15340	PEN1	2.0556	5.38e-128
AT4G12490	AT4G12490	2.05267	5.66e-120
AT5G60760	AT5G60760	2.05196	6.21e-97
AT1G09950	RAS1	2.0452	7.6e-19
AT5G20420	CLSY2	2.04409	2.6e-18
AT1G10340	AT1G10340	2.0423	7.59e-23
AT3G12730	AT3G12730	2.04204	3.05e-99
AT5G44420	PDF1.2A	2.0405	5.17e-178
AT1G37150	HCS2	2.03975	9.37e-20
AT2G41480	PER25	2.03388	5.74e-62
AT3G29150	AT3G29150	2.03081	0.00832828
AT4G19230	CYP707A1	2.0274	1.22e-115
AT3G21560	UGT84A2	2.02363	4.91e-270
AT2G38520	AT2G38520	2.02067	0.00865786
AT5G13320	GH3.12	2.02051	9.48e-32
AT5G39890	PCO2	2.01994	3.25e-161
AT3G46110	AT3G46110	2.01918	2.34e-70
AT3G44560	FAR8	2.01836	0.00875477
AT3G44260	CAF1-9	2.01786	9.14e-279
AT1G64540	AT1G64540	2.01683	2.24e-14
AT4G15310	CYP702A3	2.01652	0.00376338
AT4G13195	CLE44	2.01595	8.38e-76
AT2G39350	ABCG1	2.01461	6.77e-141
AT3G16860	COBL8	2.00724	2.61e-61
AT5G19810	AT5G19810	2.00712	9.15e-11
AT4G15370	BARS1	2.00574	6.35e-11
AT4G13030	AT4G13030	2.00567	6.26e-161
AT5G15130	WRKY72	2.00355	1.59e-64
AT4G23190	CRK11	2.00344	2.74e-170
AT4G17660	AT4G17660	2.00253	1.34e-05
AT4G21326	ATSBT3.12	2.00034	4.35e-161
AT1G12890	ERF088	1.99635	0.00144455
AT4G28490	RLK5	1.99498	2.5e-140
AT3G19580	AZF2	1.99429	2.61e-98
AT1G30620	MUR4	1.99296	5.77e-103
AT4G10380	NIP5-1	1.99228	1.97e-270
AT1G14370	APK2A	1.99125	2.6e-159
AT1G72520	LOX4	1.99117	5.83e-148
AT4G18350	NCED2	1.99052	0.000305826
AT2G44590	DRP1D	1.99052	1.81e-18
AT1G10370	GSTU17	1.9895	1.03e-124
AT3G18570	AT3G18570	1.98852	9.83e-05
AT3G59850	AT3G59850	1.98776	3.16e-28
AT3G26210	CYP71B23	1.98753	3.01e-147
AT5G02760	AT5G02760	1.98734	1.19e-188
AT1G68320	MYB62	1.98616	1.5e-10
AT5G03120	AT5G03120	1.9856	9.86e-76
AT4G28390	AAC3	1.98551	2.27e-134
AT4G35180	LHT7	1.98201	1.43e-13
AT3G04660	AT3G04660	1.98131	0.00570694
AT2G21510	AT2G21510	1.97968	2.09e-12
AT2G18690	AT2G18690	1.97871	1.32e-183
AT1G22690	GASA9	1.97851	2.19e-140
AT3G04720	HEL	1.97662	0
AT2G46270	GBF3	1.9724	3.52e-97
AT4G36930	SPT	1.97051	2.08e-150
AT5G28237	AT5G28237	1.97042	2.54e-07
AT1G76650	CML38	1.97028	1.87e-175
AT3G46620	AT3G46620	1.9693	4.48e-253
AT5G07990	CYP75B1	1.96833	2.35e-81
AT3G02875	ILR1	1.9673	5.08e-155
AT2G28570	AT2G28570	1.96687	8.68e-53
AT3G06360	AGP27	1.96509	2.93e-19
AT5G44306	AT5G44306	1.96439	0.00148123
AT2G30140	UGT87A2	1.96137	1.54e-270
AT4G22470	AT4G22470	1.96012	4.57e-152
AT5G06720	PER53	1.95655	1.01e-67
AT1G15300	AT1G15300	1.95325	5.07e-44
AT2G36660	PAB7	1.95145	2.27e-22
AT5G47050	AT5G47050	1.94804	5.31e-124
AT1G32900	GBSS1	1.94665	0
AT2G36380	ABCG34	1.94551	0
AT4G38000	DOF4.7	1.9447	0.00587931
AT4G27250	AT4G27250	1.94449	6.79e-08
AT5G24040	AT5G24040	1.94165	1.48e-05
AT5G57480	AT5G57480	1.94009	1.64e-75
AT5G56620	anac099	1.93765	8.66e-09
AT4G32460	AT4G32460	1.93613	1.37e-205
AT3G25240	AT3G25240	1.9359	3.26e-110
AT1G07390	AtRLP1	1.93456	2.39e-63
AT3G15518	AT3G15518	1.93295	2.52e-15
AT1G02220	NAC003	1.92928	7.83e-134
AT5G05530	AT5G05530	1.92698	7.11e-05
AT4G12410	AT4G12410	1.92567	1.67e-08
AT5G20810	AT5G20810	1.9235	1.38e-08
AT5G27360	SFP2	1.92215	2.6e-161
AT5G01660	AT5G01660	1.91697	2.9e-41
AT3G62260	AT3G62260	1.9151	1.55e-103
AT5G64660	PUB27	1.91458	3.88e-98
AT5G64900	PEP1	1.91357	3.3e-23
AT4G23010	UTR2	1.91241	8.23e-268
AT3G44290	NAC60	1.9098	4.22e-06
AT5G49280	AT5G49280	1.90914	4.46e-160
AT2G04100	DTXL5	1.909	1.79e-87
AT5G23990	ATFRO5	1.90833	5.1e-15
AT2G44080	ARL	1.90748	3.76e-165
AT2G30550	AT2G30550	1.90565	1.06e-170
AT1G23550	SRO2	1.90558	5.55e-41
AT1G70260	AT1G70260	1.90181	3.02e-67
AT3G42670	CLSY1	1.90061	2.29e-235
AT4G11910	SGR2	1.89909	3.42e-21
AT1G24010	AT1G24010	1.8983	0.00935416
AT1G02450	NIMIN-1	1.89791	0.000127801
AT1G23149	CPuORF29	1.89737	4.22e-25
AT2G43570	CHI	1.89617	4.38e-43
AT2G28650	ATEXO70H8	1.89432	2.24e-21
AT1G72590	AT1G72590	1.89355	0.0141185
AT4G32510	BOR7	1.89265	9.87e-24
AT5G22470	PARP3	1.8884	0.0134412
AT1G22470	AT1G22470	1.88773	1.59e-19
AT5G63130	AT5G63130	1.88359	1.38e-61
AT5G41610	CHX18	1.88348	6.56e-82
AT5G40800	AT5G40800	1.88294	0.000228217
AT1G35910	TPPD	1.88185	1.18e-47
AT4G27852	AT4G27852	1.88066	6.57e-16
AT5G06839	TGA10	1.87453	8.97e-44
AT3G05980	AT3G05980	1.87244	5.6e-26
AT3G23170	AT3G23170	1.86947	1.64e-206
AT3G25610	ALA10	1.86738	7.95e-216
AT1G71520	ERF020	1.86626	9.25e-05
AT5G25920	AT5G25920	1.86415	0.000694663
AT3G45060	NRT2.6	1.85968	0.00310695
AT2G32660	AtRLP22	1.85928	6.33e-24
AT3G57460	AT3G57460	1.85894	2.11e-07
AT5G02200	FHL	1.85772	3.1e-50
AT5G24210	AT5G24210	1.85574	0
AT3G57380	AT3G57380	1.85494	8.68e-37
AT1G19630	CYP722A1	1.85457	3.61e-18
AT3G44300	NIT2	1.8538	1.76e-261
AT5G48180	NSP5	1.85375	0
AT5G57785	AT5G57785	1.85342	1.93e-97
AT5G24110	WRKY30	1.85193	1.83e-06
AT1G65730	YSL7	1.85163	1.27e-28
AT5G10760	AT5G10760	1.85061	2.42e-37
AT3G26818	MIR169M	1.85047	0.00423532
AT1G05650	AT1G05650	1.85003	0.000464386
AT1G72210	BHLH96	1.84982	5.97e-45
AT1G04560	AT1G04560	1.84811	0.0151282
AT5G43620	PCFS5	1.84662	3.73e-16
AT4G13345	MEE55	1.84606	7.7e-150
AT5G47740	AT5G47740	1.84525	3.3e-35
AT4G39830	AT4G39830	1.84235	1.37e-28
AT4G32490	ENODL4	1.84016	0.0154454
AT4G21850	MSRB9	1.83912	0
AT5G26920	CBP60G	1.83672	4.86e-91
AT3G12500	CHI-B	1.8319	1.41e-285
AT1G76220	AT1G76220	1.83106	1.58e-07
AT5G39720	AIG2L	1.83055	9.03e-07
AT5G67340	PUB2	1.82936	3.94e-62
AT2G23230	TPS05	1.82769	0.0184027
AT4G14080	A6	1.82701	0.0189288
AT5G16080	CXE17	1.82692	2.21e-27
AT4G27590	AT4G27590	1.82644	2.5e-08
AT4G39210	APL3	1.82627	2.43e-227
AT5G47070	AT5G47070	1.82406	1.63e-102
AT2G42140	VQ17	1.82283	7.94e-05
AT1G33960	AIG1	1.82189	4.32e-22
AT1G23710	AT1G23710	1.82063	2.14e-119
AT1G51530	AT1G51530	1.81892	0.00434534
AT2G43290	CML5	1.81545	1.21e-161
AT3G14300	PME26	1.81242	0.0120207
AT1G07430	AIP1	1.8115	0.000617997
AT1G15900	AT1G15900	1.8106	2.98e-06
AT3G11340	AT3G11340	1.81036	8.94e-148
AT3G20590	AT3G20590	1.81031	8.98e-18
AT5G67080	MAPKKK19	1.81008	1.02e-62
AT5G48670	AGL80	1.80722	4.27e-14
AT1G15405	AT1G15405	1.80528	2.22e-05
AT2G27990	BLH8	1.80127	6.99e-20
AT3G53450	LOG4	1.80111	9.88e-05
AT1G56170	NFYC2	1.80101	1.67e-106
AT5G52750	AT5G52750	1.79968	1.31e-54
AT3G15990	SULTR3	1.79854	2.43e-90
AT1G67265	DVL3	1.79744	4.27e-28
AT4G33040	GRXC6	1.79433	4.05e-38
AT2G25510	AT2G25510	1.79148	8.89e-140
AT1G02390	GPAT2	1.79138	3.51e-19
AT1G09090	RBOHB	1.79096	3.68e-134
AT3G20500	PAP18	1.78974	9.69e-219
AT5G46013	AT5G46013	1.78916	0.0220238
AT5G09800	PUB28	1.78847	3.62e-44
AT1G76970	AT1G76970	1.78756	2.18e-116
AT1G11330	AT1G11330	1.78695	2.09e-233
AT1G53610	AT1G53610	1.78509	0.00172644
AT5G39050	PMAT1	1.78402	1.38e-178
AT3G60550	CYCU2-2	1.78351	1.75e-23
AT1G07870	AT1G07870	1.78316	1.36e-146
AT3G05500	AT3G05500	1.78232	1.34e-181
AT1G62790	AT1G62790	1.77945	5.57e-193
AT3G55950	CCR3	1.77905	1.12e-53
AT5G60800	AT5G60800	1.77876	1.22e-91
AT5G20670	AT5G20670	1.77801	4.4e-07
AT1G63020	NRPD1	1.77603	1.79e-110
AT2G47630	AT2G47630	1.77593	1.45e-117
AT4G13790	AT4G13790	1.77581	0.0208107
AT3G46330	MEE39	1.7749	3.2e-24
AT5G03350	AT5G03350	1.77275	8.79e-63
AT2G30660	AT2G30660	1.77205	2.39e-09
AT4G18980	AtS40-3	1.76963	0.00167286
AT5G25190	ERF003	1.76892	1.97e-75
AT3G62720	XXT1	1.76869	7.42e-177
AT3G57880	AT3G57880	1.76653	4.73e-214
AT5G42050	AT5G42050	1.76433	1.55e-264
AT1G64740	TUBA1	1.76271	2.66e-164
AT1G66480	AT1G66480	1.75917	6.46e-65
AT3G29590	5MAT	1.75684	5.59e-33
AT5G24030	SLAH3	1.75671	4.01e-140
AT5G03150	JKD	1.75635	1.69e-90
AT1G17240	RLP2	1.75628	1.31e-11
AT1G66830	AT1G66830	1.75628	1.45e-16
AT5G13190	AT5G13190	1.75558	7.04e-112
AT1G13750	PAP1	1.75558	8.55e-179
AT2G44910	ATHB-4	1.75275	1.32e-08
AT1G72490	AT1G72490	1.7515	4.17e-16
AT3G22550	AT3G22550	1.74786	3.77e-181
AT4G30880	AT4G30880	1.74502	0.0250794
AT4G17680	AT4G17680	1.74389	1.56e-43
AT3G57240	BG3	1.74209	1.08e-09
AT3G27400	AT3G27400	1.7416	1.35e-87
AT5G13820	TRP4	1.74006	2.89e-78
AT1G32170	XTH30	1.73866	6.14e-87
AT5G16200	AT5G16200	1.73803	2.44e-40
AT4G21120	CAT1	1.73622	1.25e-22
AT5G02170	AT5G02170	1.73585	4.03e-30
AT4G39403	PLS	1.73585	0.0162671
AT1G80820	CCR2	1.73479	3.25e-29
AT1G52410	TSA1	1.73276	2.39e-295
AT2G45900	AT2G45900	1.73255	1.28e-27
AT1G30135	TIFY5A	1.73237	1.08e-29
AT3G16980	NRPB9A	1.73116	1.79e-08
AT3G57450	AT3G57450	1.73088	4.86e-86
AT5G49690	UGT91C1	1.72978	3.28e-13
AT5G24200	AT5G24200	1.72937	6.02e-20
AT4G28340	AT4G28340	1.72927	0.0270817
AT4G24110	AT4G24110	1.72907	2.81e-173
AT3G14440	NCED3	1.72846	2.64e-12
AT3G08720	ATPK2	1.72844	1.72e-170
AT5G64570	BXL4	1.72822	4.66e-254
AT4G15150	AT4G15150	1.72802	6.93e-23
AT5G24070	PER61	1.72793	1.34e-10
AT2G23810	TET8	1.72779	4.38e-192
AT5G02580	AT5G02580	1.72608	6.06e-27
AT1G49000	AT1G49000	1.72553	1.43e-08
AT3G28850	AT3G28850	1.7249	8.53e-40
AT5G40540	AT5G40540	1.72475	1.66e-77
AT1G50110	BCAT6	1.72271	3e-97
AT2G30580	DRIP2	1.72249	4.03e-125
AT1G74990	AT1G74990	1.72219	0.0250214
AT5G53820	AT5G53820	1.71324	1.89e-64
AT2G28080	UGT86A2	1.71216	7.36e-138
AT4G02970	AT7SL-1	1.7113	7.51e-41
AT5G59530	AT5G59530	1.70981	8.54e-35
AT2G46950	CYP709B2	1.7098	1.74e-15
AT4G22730	AT4G22730	1.70963	3.07e-59
AT5G11160	APT5	1.70865	2.55e-63
AT1G56240	PP2B13	1.70733	1.02e-24
AT5G60470	IDD13	1.70561	8.48e-06
AT2G23030	SRK2J	1.70404	2e-99
AT4G12400	HOP3	1.70307	4.46e-134
AT3G44550	FAR5	1.70249	3.02e-72
AT1G30040	GA2OX2	1.70029	3.65e-57
AT1G63720	AT1G63720	1.69765	2e-38
AT5G18320	PUB46	1.69717	0.000489408
AT2G46990	IAA20	1.69672	0.000514287
AT1G28640	AT1G28640	1.69588	0.0276663
AT4G36988	CPuORF49	1.69499	1.71e-115
AT4G21390	B120	1.69384	1.32e-74
AT4G11350	AT4G11350	1.69253	1.05e-25
AT3G55840	HSPRO1	1.69237	6.39e-17
AT2G43120	AT2G43120	1.69236	9.25e-53
AT1G05575	AT1G05575	1.69169	1.52e-43
AT3G50760	GATL2	1.69134	2.71e-27
AT1G70170	MMP	1.69117	1.36e-20
AT5G17850	CCX2	1.6899	2.24e-41
AT3G15210	ERF4	1.68784	6.82e-290
AT4G24310	AT4G24310	1.6867	1.73e-19
AT3G44440	AT3G44440	1.6855	0.0319805
AT1G25530	AT1G25530	1.68446	9.58e-88
AT4G01895	AT4G01895	1.68342	4.61e-15
AT2G26310	FAP2	1.68297	7.2e-24
AT3G51430	SSL5	1.68279	3.9e-91
AT3G17110	AT3G17110	1.68216	5.16e-20
AT5G01225	AT5G01225	1.6798	0.00114083
AT1G22170	AT1G22170	1.67933	1.42e-115
AT1G29640	AT1G29640	1.67604	6.24e-23
AT1G66320	AT1G66320	1.67564	0.000464928
AT3G27250	AT3G27250	1.6752	0.0176468
AT1G61890	AT1G61890	1.67398	9.37e-216
AT5G49330	MYB111	1.6739	1e-19
AT4G27450	AT4G27450	1.66906	3.37e-208
AT2G47015	MIR408	1.66893	3.34e-25
AT1G74205	AT1G74205	1.66797	1.81e-06
AT5G06860	PGIP1	1.6643	2.13e-108
AT1G14170	AT1G14170	1.6639	6.75e-160
AT3G01175	AT3G01175	1.66304	1.59e-07
AT1G72950	AT1G72950	1.66143	9.19e-13
AT5G39785	AT5G39785	1.65619	2.09e-34
AT1G47890	AtRLP7	1.65549	7.81e-05
AT1G54100	ALDH7B4	1.65529	0
AT1G62840	AT1G62840	1.65414	5.32e-06
AT3G01420	DOX1	1.65414	1.14e-265
AT3G12910	AT3G12910	1.65359	0.0334023
AT5G11650	AT5G11650	1.65152	1.57e-94
AT5G44568	AT5G44568	1.64906	7.16e-36
AT2G36724	AT2G36724	1.64703	0.0319212
AT2G30070	POT1	1.64686	7.01e-111
AT2G31880	SOBIR1	1.64666	1.1e-199
AT4G36430	PER49	1.64651	6.04e-110
AT5G64310	AGP1	1.64597	2.37e-207
AT1G18740	AT1G18740	1.64528	6.52e-168
AT4G13110	AT4G13110	1.64315	7.62e-40
AT1G63090	PP2A11	1.64299	1.5e-111
AT3G13520	AGP12	1.64211	3.03e-31
AT1G23040	AT1G23040	1.64184	4.03e-98
AT4G00770	AT4G00770	1.64084	4.71e-07
AT5G22500	FAR1	1.6397	6.42e-107
AT3G23635	RTFL13	1.63829	0.00195135
AT5G64910	AT5G64910	1.63783	3.78e-24
AT3G62590	AT3G62590	1.63773	2.23e-20
AT2G46680	ATHB-7	1.63431	2.95e-85
AT3G54000	AT3G54000	1.63369	4.47e-36
AT5G17450	HIPP21	1.63198	4.26e-40
AT1G20070	AT1G20070	1.63193	8.43e-37
AT4G36280	AT4G36280	1.63176	3.1e-78
AT1G01190	CYP78A8	1.62953	9.91e-29
AT1G16370	45936	1.62484	1.82e-40
AT1G57850	AT1G57850	1.62311	0.0343298
AT2G24165	AT2G24165	1.62216	0.0344198
AT5G27630	ACBP5	1.62016	3.56e-40
AT3G44326	AT3G44326	1.61954	2.88e-24
AT3G03310	LCAT3	1.61717	1.46e-121
AT3G05550	AT3G05550	1.61567	5.4e-07
AT3G26790	FUS3	1.61566	0
AT5G46060	AT5G46060	1.61384	8.14e-09
AT2G01940	SGR5	1.6132	8.37e-39
AT3G54320	WRI1	1.61203	6.39e-67
AT1G23350	AT1G23350	1.61201	0.00542315
AT1G71690	AT1G71690	1.61177	0.0011556
AT3G03280	AT3G03280	1.61146	1.49e-07
AT1G36060	ERF055	1.61131	4.51e-122
AT2G23150	NRAMP3	1.61092	4.76e-79
AT3G55110	ABCG18	1.61038	4.68e-42
AT2G40140	CZF1	1.61005	0
AT4G21500	AT4G21500	1.60963	1.48e-07
AT2G41170	AT2G41170	1.60922	2.59e-40
AT5G05350	AT5G05350	1.60854	8.27e-06
AT5G52050	AT5G52050	1.60843	2.66e-27
AT5G25910	AtRLP52	1.60738	3.55e-11
AT4G14450	AT4G14450	1.6072	0.000809684
AT3G51590	LTP12	1.60668	0.039494
AT1G13550	AT1G13550	1.60509	0.0411936
AT3G07120	AT3G07120	1.6035	2.2e-07
AT5G09360	LAC14	1.60261	0.0369901
AT3G18610	NUCL2	1.60198	6.28e-27
AT3G48510	AT3G48510	1.60116	1.02e-10
AT3G02000	GRXC7	1.59965	2.86e-06
AT3G52770	ZPR3	1.5972	2.13e-08
AT2G41730	AT2G41730	1.59591	1.45e-33
AT3G53690	AT3G53690	1.59578	8.27e-11
AT1G42990	BZIP60	1.59562	4.97e-117
AT4G36740	ATHB-40	1.59424	3.94e-05
AT2G40095	AT2G40095	1.59367	6.16e-43
AT5G25770	AT5G25770	1.59207	3.84e-131
AT1G26911	AT1G26911	1.59093	0.0370817
AT5G44360	AT5G44360	1.58994	0.0419824
AT1G61610	AT1G61610	1.5894	1.63e-24
AT1G21310	EXT3	1.58706	1.4e-28
AT5G03670	AT5G03670	1.58615	3.76e-48
AT1G73680	DOX2	1.58497	1.66e-248
AT5G36110	CYP716A1	1.5849	0.000105441
AT2G34070	TBL37	1.58312	1.35e-129
AT4G01430	AT4G01430	1.58061	7.15e-77
AT2G35658	AT2G35658	1.57918	4.57e-05
AT4G14390	AT4G14390	1.57847	6.42e-13
AT3G22560	AT3G22560	1.57623	2.93e-08
AT5G20790	AT5G20790	1.57567	3.4e-115
AT3G23150	ETR2	1.57446	3.32e-145
AT1G17620	AT1G17620	1.57333	1.66e-141
AT4G02320	PME40	1.57303	0.000606703
AT5G53420	AT5G53420	1.57178	7.94e-170
AT3G05630	PLDP2	1.57028	1.54e-113
AT1G71691	AT1G71691	1.57026	0.0217005
AT1G69850	NPF4.6	1.57004	3.42e-262
AT3G27220	AT3G27220	1.56911	5.28e-152
AT1G73010	PS2	1.56535	0
AT3G50260	ERF011	1.5653	2.28e-47
AT1G49930	AT1G49930	1.56508	0.0409001
AT3G19200	AT3G19200	1.56114	5.75e-13
AT2G15490	UGT73B4	1.56051	2.76e-76
AT3G13432	AT3G13432	1.55849	0.000118798
AT2G22810	ACS4	1.55728	0.0180251
AT3G05920	AT3G05920	1.55534	2.75e-34
AT5G07010	SOT15	1.5543	1.07e-54
AT3G56220	AT3G56220	1.55269	5.86e-19
AT3G25290	AT3G25290	1.55168	4.91e-153
AT2G02930	GSTF3	1.55151	6.95e-08
AT4G35070	AT4G35070	1.55139	4.77e-33
AT1G73210	AT1G73210	1.55026	9.23e-24
AT3G17770	AT3G17770	1.54868	1.01e-104
AT5G59220	HAI1	1.54832	3.4e-08
AT4G26890	MAPKKK16	1.54599	2.16e-14
AT3G54030	AT3G54030	1.54588	3.2e-100
AT1G17750	PEPR2	1.5447	7.29e-38
AT3G23120	AtRLP38	1.54438	1e-07
AT2G32030	AT2G32030	1.54412	6.84e-21
AT2G34185	AT2G34185	1.54395	1.62e-06
AT2G15340	AT2G15340	1.54264	0.0394145
AT5G15850	COL1	1.54074	1.48e-48
AT2G47550	PME20	1.53735	2.79e-42
AT3G52400	SYP122	1.53594	4.31e-184
AT1G16500	AT1G16500	1.53476	8.5e-22
AT1G31580	ECS1	1.53471	3.35e-114
AT1G79360	45932	1.53369	2.61e-11
AT4G12480	EARLI1	1.53292	5.5e-249
AT3G23550	LAL5	1.53274	1.14e-228
AT1G71695	PER12	1.53195	2.41e-180
AT3G52450	PUB22	1.53163	9.3e-45
AT4G30060	AT4G30060	1.53157	1.4e-115
AT2G42790	CSY3	1.53063	9.4e-281
AT5G37770	CML24	1.52885	2.8e-76
AT1G34630	AT1G34630	1.52687	1.96e-126
AT1G69480	PHO1-H10	1.52678	1.23e-11
AT4G33560	AT4G33560	1.52652	1.2e-99
AT4G05110	ENT6	1.52651	1.88e-12
AT1G62440	LRX2	1.5211	4.16e-54
AT4G00950	MEE47	1.52076	2.44e-79
AT1G66290	AT1G66290	1.52062	0.0467184
AT3G56880	AT3G56880	1.51895	5.21e-121
AT3G55090	ABCG16	1.51874	4.93e-11
AT1G33760	ERF022	1.5146	3.28e-10
AT1G61750	CRRSP1	1.51365	0.0129497
AT1G50740	FAX5	1.51353	1.38e-51
AT5G24655	LSU4	1.51346	4.72e-12
AT1G16670	AT1G16670	1.51337	4.92e-69
AT1G15110	PSS1	1.51327	3.16e-90
AT3G23090	AT3G23090	1.51257	1.14e-109
AT2G05910	AT2G05910	1.51197	1.87e-11
AT4G04020	PAP1	1.51041	2.61e-275
AT5G20410	MGD2	1.50979	2.27e-132
AT3G10040	AT3G10040	1.50915	1.08e-192
AT3G12145	FLR1	1.50806	1.98e-95
AT2G40470	LBD15	1.50657	3.29e-12
AT1G19610	PDF1.4	1.50479	3.13e-09
AT1G58360	AAP1	1.50445	1.4e-183
AT5G27760	AT5G27760	1.50311	2.56e-110
AT5G60460	AT5G60460	1.50294	2.79e-58
AT3G41979	AT3G41979	1.5022	5.5e-65
AT5G41460	AT5G41460	1.49948	6.29e-58
AT5G67060	HEC1	1.49943	1.69e-17
AT4G15380	CYP705A4	1.49841	1.84e-15
AT4G34860	INVB	1.49788	5.21e-89
AT5G53950	NAC098	1.49767	0.000295402
AT4G39480	CYP96A9	1.49624	1.27e-09
AT4G37870	PCKA	1.49546	9.36e-271
AT1G72140	NPF5.12	1.49525	9.77e-33
AT3G04640	AT3G04640	1.49497	1.31e-55
AT1G04150	AT1G04150	1.49286	0.0370771
AT5G16990	P2	1.49211	3.38e-95
AT5G46640	AHL8	1.49067	2.82e-29
AT1G05420	OFP12	1.49054	1.29e-05
AT2G17043	AT2G17043	1.49022	0.0498895
AT1G74360	AT1G74360	1.48887	3.37e-34
AT1G73590	PIN1	1.48877	2.54e-80
AT5G06320	NHL3	1.48832	5.15e-289
AT1G19530	AT1G19530	1.48807	9.99e-71
AT4G13395	DVL10	1.48785	2.43e-38
AT2G39330	JAL23	1.48705	2e-266
AT1G22400	UGT85A1	1.48627	2.59e-147
AT5G07460	MRSA2	1.48291	2.95e-192
AT3G51440	SSL6	1.48224	2.06e-34
AT1G25230	PAP4	1.48216	9.49e-138
AT3G18280	AT3G18280	1.48159	4.1e-104
AT5G02420	SMR3	1.4794	1.53e-19
AT4G34230	CAD5	1.47763	2.23e-181
AT5G64250	AT5G64250	1.47735	1.59e-146
AT3G55430	AT3G55430	1.47646	1.18e-126
AT4G34380	AT4G34380	1.47631	8.85e-08
AT5G10520	RBK1	1.4748	2.7e-36
AT2G28400	AT2G28400	1.47436	1.55e-22
AT5G46080	AT5G46080	1.47421	1.53e-26
AT2G25140	CLPB4	1.47362	9.29e-126
AT3G15510	ATNAC2	1.47312	9.53e-63
AT4G23720	AT4G23720	1.47115	1.49e-07
AT1G59860	HSP17.6A	1.46877	3.54e-20
AT3G11410	PP2CA	1.46817	3.67e-147
AT3G02630	S-ACP-DES5	1.46812	4.73e-273
AT3G15536	AT3G15536	1.46232	0.0322579
AT5G13700	PAO1	1.46147	1.98e-06
AT3G23870	AT3G23870	1.45937	5.84e-20
AT1G16130	WAKL2	1.45518	3.81e-21
AT2G45315	AT2G45315	1.45419	0.00600891
AT3G52525	OFP6	1.45272	2.41e-09
AT1G21050	AT1G21050	1.45264	8.76e-82
AT1G04990	AT1G04990	1.44989	3.73e-165
AT4G13555	MIR397B	1.44969	0.0187672
AT1G09500	AT1G09500	1.4491	5.23e-35
AT3G29190	TPS15	1.44856	0.00679201
AT4G14640	CML8	1.44852	2.99e-06
AT5G28262	AT5G28262	1.44779	3.97e-12
AT4G22530	AT4G22530	1.44777	8.61e-35
AT3G45638	AT3G45638	1.44747	0.00179074
AT2G30130	LBD12	1.44143	1.94e-12
AT2G38920	RF178	1.44133	4.7e-05
AT5G35110	AT5G35110	1.4395	0.00175552
AT1G35190	AT1G35190	1.43929	2.69e-159
AT4G02280	SUS3	1.43818	2.81e-50
AT4G26200	ACS7	1.43807	2.78e-35
AT3G25620	ABCG21	1.43807	1.31e-16
AT1G72900	AT1G72900	1.43798	2.81e-106
AT2G33110	VAMP723	1.43522	7.21e-24
AT5G44380	AT5G44380	1.43311	7.4e-272
AT3G44720	ADT4	1.43239	2.87e-134
AT5G11100	SYT4	1.43122	7.87e-48
AT1G55790	AT1G55790	1.43107	0.00658967
AT3G49530	NAC062	1.4303	1.88e-134
AT4G30370	ATL14	1.42867	1.1e-24
AT1G23140	AT1G23140	1.42791	1.01e-71
AT3G44310	NIT1	1.42791	0
AT2G26440	PME12	1.42621	6.17e-107
AT3G47420	ATPS3	1.42454	9.41e-244
AT5G43890	YUC5	1.42273	5.34e-10
AT1G69790	AT1G69790	1.42183	7.73e-08
AT5G54470	AT5G54470	1.42154	8.47e-14
AT5G24530	DMR6	1.42044	1.16e-52
AT1G35210	AT1G35210	1.42039	6.83e-14
AT4G26590	OPT5	1.4198	9.98e-20
AT2G16890	UGT90A1	1.41977	2.42e-40
AT3G20660	45934	1.41862	5.59e-48
AT2G17480	MLO8	1.41825	7.09e-129
AT1G67600	AT1G67600	1.41758	3.68e-38
AT3G20200	AT3G20200	1.41724	1.83e-21
AT1G10140	AT1G10140	1.41379	1.82e-65
AT4G30460	AT4G30460	1.41092	1.27e-36
AT3G60520	AT3G60520	1.41065	3.05e-37
AT3G60420	AT3G60420	1.40831	1.66e-31
AT2G02120	PDF2.1	1.40824	1.47e-21
AT1G22250	AT1G22250	1.40818	3.55e-21
AT5G17980	AT5G17980	1.40769	5.16e-28
AT4G29240	AT4G29240	1.40645	1.86e-41
AT4G02050	STP7	1.40502	1.17e-151
AT5G63970	AT5G63970	1.40372	1.66e-33
AT2G32930	ZFN2	1.40328	1.78e-42
AT5G28300	AT5G28300	1.40122	7.85e-98
AT4G12720	NUDT7	1.40097	1.49e-108
AT3G25510	AT3G25510	1.40076	1.45e-10
AT5G08240	AT5G08240	1.39947	1.42e-46
AT1G72855	AT1G72855	1.39893	1.36e-07
AT4G26270	PFK3	1.39867	1.37e-45
AT2G27500	AT2G27500	1.39851	2.74e-154
AT5G58570	AT5G58570	1.39515	1.43e-20
AT1G61370	AT1G61370	1.39422	1.88e-18
AT4G23810	WRKY53	1.39387	2.92e-36
AT1G16420	AMC8	1.39266	0.000161599
AT3G21530	AT3G21530	1.39224	4.37e-64
AT3G14620	CYP72A8	1.39165	1.24e-240
AT3G15356	LEC	1.38983	1.71e-217
AT2G46640	AT2G46640	1.38958	1.31e-59
AT3G18690	MKS1	1.38852	6.73e-32
AT4G32295	AT4G32295	1.38827	1.35e-22
AT1G16390	45933	1.38752	2.44e-100
AT1G76600	AT1G76600	1.38495	1e-57
AT4G23700	CHX17	1.38459	2.38e-39
AT3G18485	ILR2	1.38286	0.00440272
AT1G01720	NAC002	1.38258	2.54e-116
AT1G53620	AT1G53620	1.38253	0.0407624
AT3G25730	ARF14	1.3824	3.42e-47
AT5G54230	MYB49	1.38111	4.89e-17
AT3G20395	AT3G20395	1.38094	1.4e-36
AT4G33920	AT4G33920	1.3803	5.07e-131
AT1G52110	AT1G52110	1.37912	0.00202845
AT3G08690	UBC11	1.37621	5.67e-76
AT4G16780	HAT4	1.3758	2.55e-30
AT1G12600	UTR4	1.37548	4.28e-06
AT3G01970	WRKY45	1.37464	1.66e-49
AT3G55370	DOF3.6	1.374	1.55e-26
AT2G20470	AT2G20470	1.37388	0.0386047
AT1G69490	NAC029	1.372	2.85e-28
AT4G27970	SLAH2	1.37163	1.81e-22
AT1G22510	AT1G22510	1.37119	1.27e-39
AT1G07000	ATEXO70B2	1.37091	1.26e-85
AT2G29065	SCL34	1.36992	1.77e-18
AT4G07960	CSLC12	1.36812	1.49e-29
AT5G24770	VSP2	1.36785	1.83e-240
AT3G26470	AT3G26470	1.36779	1.23e-40
AT2G47260	WRKY23	1.36646	3.19e-24
AT4G00380	FDM2	1.36573	3.37e-73
AT5G18150	AT5G18150	1.36562	2.36e-28
AT3G13310	AT3G13310	1.36266	2.74e-127
AT3G10000	EDA31	1.36235	0.000897408
AT4G16690	PPD	1.36152	1.56e-34
AT5G66620	DAR6	1.35947	9.71e-20
AT3G22961	AT3G22961	1.35562	0.0248811
AT3G23790	AAE16	1.35533	5.83e-56
AT2G30250	WRKY25	1.35484	1.76e-94
AT2G34930	AT2G34930	1.35462	7.07e-51
AT2G26290	ARSK1	1.35337	3.55e-16
AT1G14780	AT1G14780	1.3519	7.13e-19
AT3G12510	AT3G12510	1.35056	7.85e-10
AT1G67148	AT1G67148	1.35056	8.4e-10
AT1G09070	SRC2	1.35035	1.35e-225
AT3G28380	ABCB17	1.34777	0.0135074
AT3G55240	AT3G55240	1.34736	1.79e-54
AT5G28020	CYSD2	1.34735	4.26e-134
AT5G24590	ANAC091	1.3468	3.2e-141
AT4G00250	AT4G00250	1.34674	3.48e-05
AT5G56960	BHLH41	1.34573	0.0446483
AT2G24100	AT2G24100	1.34523	1.8e-59
AT4G15270	AT4G15270	1.34496	7.31e-09
AT3G16190	AT3G16190	1.34482	1.13e-122
AT4G10040	CYTC-2	1.3433	9.58e-64
AT1G56010	NAC021	1.34249	4.66e-78
AT2G40820	SCAB2	1.34242	4.47e-66
AT3G10320	AT3G10320	1.34216	7.74e-19
AT1G09420	G6PD4	1.34213	2.09e-127
AT5G03890	AT5G03890	1.34131	0.00249512
AT1G24130	AT1G24130	1.34033	0.00335279
AT1G35350	PHO1-H8	1.33882	3.2e-86
AT3G50190	AT3G50190	1.33847	1.14e-08
AT1G13430	STO9	1.33621	1.14e-05
AT4G12250	GAE5	1.33571	2.52e-33
AT1G44020	AT1G44020	1.33431	0.0111364
AT1G66090	AT1G66090	1.33381	3.19e-42
AT5G04660	CYP77A4	1.33213	1.73e-10
AT4G01420	CBL5	1.33174	0.0284249
AT1G33700	AT1G33700	1.33151	8.95e-109
AT1G05000	AT1G05000	1.3314	1.1e-78
AT3G16720	ATL2	1.33118	1.08e-111
AT3G16330	AT3G16330	1.32926	6.71e-39
AT4G37580	HLS1	1.32825	1.06e-14
AT1G08310	AT1G08310	1.32557	1.6e-87
AT4G30350	AT4G30350	1.32545	9.08e-100
AT3G57410	VLN3	1.32511	1.23e-138
AT4G34419	AT4G34419	1.3238	0.00607617
AT3G11840	PUB24	1.32245	1.33e-28
AT5G35735	AT5G35735	1.32153	1.66e-189
AT2G39710	AT2G39710	1.32117	8.84e-28
AT2G25250	AT2G25250	1.32114	4.04e-80
AT1G19640	JMT	1.31676	9.87e-10
AT1G14870	PCR2	1.31632	3.06e-55
AT2G48090	AT2G48090	1.31542	2.26e-19
AT5G59090	ATSBT4.12	1.31236	1.06e-106
AT1G59590	ZCF37	1.31111	5.62e-28
AT1G68470	AT1G68470	1.31091	5.58e-22
AT5G59590	UGT76E2	1.31066	0.000296338
AT5G13490	AAC2	1.31024	3.86e-150
AT1G58410	RXW24L	1.3095	1.89e-17
AT5G41740	AT5G41740	1.30845	1.43e-97
AT5G08760	AT5G08760	1.30833	2.83e-26
AT3G26980	MUB4	1.30813	2.86e-52
AT1G70440	SRO3	1.30586	1.93e-05
AT4G22590	TPPG	1.30579	0.00371847
AT5G05480	AT5G05480	1.30486	1.3e-55
AT1G68410	AT1G68410	1.30484	3.09e-98
AT2G45210	SAUR36	1.30271	2.75e-22
AT5G54640	RAT5	1.30222	1.13e-39
AT5G01820	CIPK14	1.30204	2.75e-75
AT3G59880	AT3G59880	1.30159	2.16e-08
AT5G06530	ABCG22	1.30124	2.56e-58
AT3G53620	PPA4	1.29897	2.59e-150
AT3G04380	SUVR4	1.29672	3.8e-45
AT1G23000	AT1G23000	1.29657	8.61e-22
AT4G09030	AGP10	1.29623	9.16e-82
AT4G34180	AT4G34180	1.29553	1.54e-228
AT5G43860	CLH2	1.29521	4.57e-30
AT3G54820	PIP2-5	1.29343	4e-37
AT1G08650	PPCK1	1.29106	3.29e-126
AT1G32860	AT1G32860	1.29081	5.5e-53
AT1G68360	AT1G68360	1.29033	1.84e-05
AT3G46090	ZAT7	1.28858	1.31e-18
AT2G25690	AT2G25690	1.28718	1.24e-26
AT3G14630	CYP72A9	1.28714	0.0003776
AT4G21410	CRK29	1.28618	2.52e-122
AT1G03120	ATRAB28	1.28591	0.0147383
AT4G15610	AT4G15610	1.28404	1.18e-62
AT1G17420	LOX3	1.28357	1.04e-53
AT2G45120	ZAT4	1.28103	5e-10
AT2G14520	CBSDUF3	1.28042	1.69e-19
AT4G26460	AT4G26460	1.28037	0.00583696
AT4G20170	AT4G20170	1.27886	2.41e-77
AT3G09910	RABC2B	1.27844	9.62e-10
AT5G25350	EBF2	1.27763	3.63e-197
AT3G57950	AT3G57950	1.27716	6.66e-08
AT3G28940	AT3G28940	1.27651	1.47e-227
AT3G60647	AT3G60647	1.27621	0.0396885
AT3G09960	AT3G09960	1.27407	3.85e-06
AT2G22240	IPS2	1.27344	1.01e-58
AT5G47060	AT5G47060	1.27314	4.1e-50
AT4G14980	AT4G14980	1.27138	1.82e-24
AT4G11280	ACS6	1.27064	4.72e-114
AT1G51760	ILL4	1.26981	5.54e-166
AT3G57780	AT3G57780	1.26858	3.28e-58
AT1G07500	AT1G07500	1.26854	0.0129717
AT3G58790	GAUT15	1.26789	9.31e-59
AT5G23220	NIC3	1.26753	2.53e-28
AT1G62620	AT1G62620	1.26715	1.79e-06
AT4G22920	SGR1	1.26639	1.5e-56
AT5G08480	VQ31	1.2633	1.41e-05
AT2G33150	PED1	1.2632	1.97e-267
AT5G45428	CPuORF24	1.26238	4.22e-05
AT1G58460	AT1G58460	1.26204	0.00684441
AT1G20270	P4H3	1.26148	7.43e-49
AT3G57130	NPR6	1.26076	9.31e-07
AT5G53290	CRF3	1.2585	9.83e-23
AT1G23560	AT1G23560	1.25675	2.25e-11
AT2G22420	PER17	1.25604	1.73e-28
AT3G24340	CLSY4	1.25558	6.39e-05
AT4G19520	AT4G19520	1.25543	4.88e-55
AT5G51160	AT5G51160	1.25508	6.76e-09
AT1G77920	TGA7	1.25432	1.01e-113
AT3G14450	CID9	1.2522	1.28e-14
AT4G01140	AT4G01140	1.252	4.43e-05
AT5G24430	CRK4	1.25123	3.47e-70
AT1G15310	SRP-54A	1.24965	7.96e-35
AT1G22882	AT1G22882	1.24953	1.34e-83
AT3G04010	AT3G04010	1.2477	3.15e-17
AT3G51890	AT3G51890	1.24701	9.8e-48
AT3G50310	MAPKKK20	1.24614	1.64e-07
AT1G22403	AT1G22403	1.24582	6.44e-18
AT1G61360	AT1G61360	1.24465	2.51e-49
AT1G28760	AT1G28760	1.2437	5.38e-16
AT3G46450	AT3G46450	1.24367	1.45e-78
AT4G08950	EXO	1.24301	1.53e-159
AT4G27657	AT4G27657	1.24298	1.65e-12
AT5G13370	AT5G13370	1.24277	8.67e-120
AT3G22370	AOX1A	1.24048	7.37e-134
AT3G63060	EDL3	1.23979	0.00160003
AT3G11820	SYP121	1.2395	7.49e-88
AT2G36950	AT2G36950	1.23911	2.4e-100
AT4G33280	REM16	1.23907	5.71e-12
AT2G47160	BOR1	1.23785	9.81e-89
AT5G20635	GG3	1.23696	1.12e-17
AT5G54510	GH3.6	1.23603	3.89e-73
AT5G50330	AT5G50330	1.23519	1.2e-34
AT5G10510	AIL6	1.23519	6.06e-37
AT1G66350	RGL1	1.23486	1.07e-48
AT5G37490	PUB21	1.2306	0.00403633
AT1G10410	AT1G10410	1.23043	7.75e-125
AT4G16210	ECHIA	1.22973	9.09e-71
AT4G30610	SCPL24	1.22944	2.61e-30
AT5G57790	AT5G57790	1.22939	1.45e-12
AT2G44430	AT2G44430	1.22921	1.9e-41
AT5G16970	P1	1.22852	5.07e-179
AT5G55010	AT5G55010	1.22707	0.0345883
AT3G29370	AT3G29370	1.22307	2.71e-05
AT4G34420	AT4G34420	1.22239	2.32e-07
AT4G19720	AT4G19720	1.22228	0.00116328
AT5G03610	AT5G03610	1.22193	5.07e-85
AT1G10540	NAT8	1.2205	1.52e-05
AT5G65110	ACX2	1.21988	5.3e-158
AT3G05360	AtRLP30	1.21905	1.02e-14
AT5G03190	CPUORF47	1.21834	1.5e-58
AT1G63440	HMA5	1.21787	2.45e-35
AT1G64610	AT1G64610	1.21734	1.7e-38
AT5G39360	EDL2	1.2173	2.17e-39
AT3G62150	ABCB21	1.21711	8.06e-84
AT5G53750	AT5G53750	1.21623	3.96e-31
AT4G18422	AT4G18422	1.21576	0.0223851
AT5G47910	RBOHD	1.21542	2.09e-68
AT3G22830	HSFA6B	1.2148	3.72e-06
AT3G47600	MYB94	1.2141	5.94e-23
AT5G51370	AT5G51370	1.21405	7.49e-13
AT1G76620	AT1G76620	1.21235	1.28e-16
AT3G45040	AT3G45040	1.21096	2.78e-62
AT1G60890	PIP5K8	1.21076	1.02e-68
AT3G28915	AT3G28915	1.21006	0.0240417
AT5G54490	PBP1	1.20912	9.43e-14
AT2G25000	WRKY60	1.20743	7.13e-18
AT5G41320	AT5G41320	1.2069	0.0314729
AT2G05300	AT2G05300	1.20667	1.65e-18
AT2G01300	AT2G01300	1.20631	3.8e-09
AT1G75580	AT1G75580	1.20592	1.98e-08
AT5G42890	ATSCP2	1.20592	4.35e-59
AT1G74330	AT1G74330	1.20575	1.18e-31
AT4G12580	AT4G12580	1.20498	1.42e-05
AT3G23050	IAA7	1.20482	7.78e-99
AT2G36210	AT2G36210	1.2042	0.000123431
AT5G38280	PR5K	1.20372	8.43e-26
AT2G35160	SUVH5	1.20328	7.83e-20
AT1G44100	AAP5	1.20323	4.16e-107
AT4G36010	AT4G36010	1.20311	5.74e-42
AT2G36500	CBSCBSPB2	1.20162	6.2e-07
AT1G55700	AT1G55700	1.19844	0.0416143
AT3G55980	SZF1	1.19817	1.48e-170
AT4G10580	AT4G10580	1.19682	0.00251894
AT5G58620	AT5G58620	1.19638	5.99e-74
AT5G57010	AT5G57010	1.19605	1e-06
AT2G41240	BHLH100	1.19601	0.00298246
AT1G76670	UDP-GALT2	1.19505	1.72e-123
AT3G27880	AT3G27880	1.1948	1.11e-32
AT2G39650	AT2G39650	1.19443	3.96e-33
AT2G01180	LPP1	1.19266	2.04e-70
AT2G37370	AT2G37370	1.19172	1.04e-05
AT5G05250	AT5G05250	1.19166	2.67e-36
AT4G35480	ATL45	1.19087	4.32e-26
AT1G20860	PHT1-8	1.1889	0.0311095
AT4G02940	AT4G02940	1.18847	1.3e-89
AT2G16980	AT2G16980	1.1884	2.77e-28
AT1G30530	UGT78D1	1.18818	6.26e-115
AT3G11180	AT3G11180	1.18745	0.0497351
AT3G11370	AT3G11370	1.18684	8.58e-06
AT3G10200	AT3G10200	1.18632	6.74e-48
AT5G09300	T5E8_100	1.18631	1.14e-42
AT1G51660	MKK4	1.18564	4.65e-56
AT5G48540	CRRSP55	1.1853	1.41e-22
AT1G12550	HPR3	1.18339	8.15e-37
AT2G47270	UPB1	1.18302	4.44e-11
AT4G17550	AT4G17550	1.18259	5.05e-35
AT5G15800	45901	1.18159	0.00700358
AT3G27540	AT3G27540	1.1809	8.79e-13
AT4G35110	AT4G35110	1.18081	7.21e-22
AT1G62380	ACO2	1.18081	1.19e-262
AT3G60930	AT3G60930	1.17988	3.59e-12
AT4G08250	SCL26	1.17943	0.0133046
AT4G04960	LECRK71	1.17931	2.19e-53
AT5G12010	AT5G12010	1.1789	8.93e-42
AT3G11420	AT3G11420	1.17886	2.67e-46
AT2G45920	PUB37	1.17855	4.65e-57
AT5G16240	S-ACP-DES1	1.17853	8.26e-35
AT2G43930	AT2G43930	1.17846	0.0285684
AT1G66880	AT1G66880	1.17822	3.22e-50
AT3G57760	AT3G57760	1.17763	5.32e-12
AT1G09932	AT1G09932	1.17695	6.14e-19
AT2G22170	AT2G22170	1.17638	7.8e-121
AT1G19960	AT1G19960	1.17525	1.8e-05
AT5G22690	AT5G22690	1.1734	5.29e-41
AT2G28420	AT2G28420	1.17305	0.0108017
AT5G09540	AT5G09540	1.17234	3.83e-19
AT1G74670	GASA6	1.17207	2.43e-51
AT1G63860	AT1G63860	1.17138	7.77e-50
AT2G30500	NET4B	1.17083	1.47e-110
AT1G28170	SOT7	1.17048	0.00161815
AT2G30766	AT2G30766	1.16972	3.71e-11
AT4G36880	CP1	1.16857	1.01e-10
AT2G19710	AT2G19710	1.16856	3.76e-32
AT5G38550	JAL44	1.16769	4.1e-36
AT2G39410	AT2G39410	1.16758	7.14e-11
AT3G59700	LECRK55	1.16655	1.3e-22
AT1G26260	BHLH76	1.16532	2.54e-20
AT1G09970	LRR XI-23	1.16327	3.89e-176
AT5G63090	LOB	1.1631	5.44e-13
AT5G23850	AT5G23850	1.16244	2.22e-35
AT2G29990	NDA2	1.16243	1.95e-25
AT3G61980	AT3G61980	1.16174	9.36e-21
AT2G19450	DGAT1	1.16	6.88e-120
AT4G12000	AT4G12000	1.15978	2.68e-15
AT1G54730	AT1G54730	1.1582	1.08e-66
AT3G53403	AT3G53403	1.1577	0.0394741
AT4G13660	PRR2	1.1572	3.46e-51
AT2G40270	AT2G40270	1.15662	1.02e-49
AT5G57620	MYB36	1.15648	3.42e-14
AT4G32800	ERF043	1.15612	5.77e-21
AT3G14870	AT3G14870	1.15482	1.61e-41
AT1G44800	AT1G44800	1.15403	1.09e-110
AT3G10720	PME25	1.15393	4.63e-70
AT1G73080	PEPR1	1.15351	8.32e-70
AT2G41800	AT2G41800	1.15186	6.92e-34
AT5G61900	BON1	1.15026	3.75e-54
AT5G05390	LAC12	1.14993	0.00588233
AT4G31800	WRKY18	1.14987	6.6e-124
AT2G05810	AT2G05810	1.1492	1.88e-44
AT5G03110	AT5G03110	1.14882	1.09e-09
AT5G05190	Y-1	1.14854	1.97e-21
AT2G27035	ENODL20	1.14853	7.67e-06
AT1G09645	AT1G09645	1.14778	2.08e-33
AT3G57120	AT3G57120	1.1465	5.94e-22
AT2G36270	ABI5	1.14436	7.06e-09
AT1G70740	AT1G70740	1.14435	3.57e-43
AT5G57000	AT5G57000	1.1438	4.9e-29
AT4G16680	AT4G16680	1.14338	7.34e-17
AT2G23680	AT2G23680	1.14279	3.96e-14
AT2G26530	AR781	1.14135	3.19e-93
AT1G12290	AT1G12290	1.14045	2.22e-11
AT4G18170	WRKY28	1.14027	8.09e-09
AT1G25370	AT1G25370	1.13865	7.24e-26
AT3G60130	BGLU16	1.13864	8.31e-80
AT1G65490	AT1G65490	1.13811	6.79e-19
AT1G17060	CYP72C1	1.1374	3.26e-27
AT5G12330	LRP1	1.13727	5.16e-28
AT3G18950	AT3G18950	1.13727	1.81e-06
AT2G14210	ANR1	1.13686	0.000322169
AT2G31110	TBL40	1.13664	3.78e-28
AT3G15260	AT3G15260	1.13613	3.58e-75
AT1G79960	OFP14	1.13488	1.92e-11
AT5G56630	PFK7	1.13454	1.53e-147
AT5G21280	AT5G21280	1.13398	5.26e-23
AT5G55490	GEX1	1.13005	0.00120705
AT5G67360	SBT1.7	1.12924	6.37e-65
AT4G25670	AT4G25670	1.12911	0.0220886
AT5G18310	AT5G18310	1.12701	2.87e-67
AT5G19240	AT5G19240	1.127	2.04e-44
AT1G11920	AT1G11920	1.12518	0.00482584
AT1G29050	TBL38	1.1248	5.84e-42
AT4G22305	AT4G22305	1.1212	4.28e-12
AT4G14780	AT4G14780	1.12113	6.86e-08
AT5G52900	MAKR6	1.11994	1.68e-30
AT5G41400	AT5G41400	1.11972	1.69e-23
AT5G51040	SDHAF2	1.11944	1.35e-91
AT1G69410	ELF5A-3	1.11794	5.24e-67
AT5G67350	AT5G67350	1.11786	1.28e-14
AT1G76980	AT1G76980	1.11432	1.03e-17
AT2G32960	AT2G32960	1.11427	2.78e-65
AT5G52570	BETA-OHASE 2	1.11305	4.62e-05
AT1G14390	AT1G14390	1.11272	1.05e-13
AT3G24770	CLE41	1.11253	3.83e-44
AT3G05490	RALFL22	1.11236	1.53e-65
AT3G59900	ARGOS	1.11229	4.2e-14
AT5G22860	AT5G22860	1.11211	1.16e-29
AT5G24240	PI4KG3	1.11202	1.39e-47
AT2G32940	AGO6	1.11168	5.53e-16
AT2G26870	NPC2	1.1107	5.24e-28
AT5G01520	AT5G01520	1.11035	3e-17
AT2G41640	AT2G41640	1.1091	1.17e-40
AT1G30720	AT1G30720	1.1085	3.24e-11
AT1G70510	KNAT2	1.10703	4.9e-05
AT4G10310	HKT1	1.10636	2.01e-06
AT3G49620	DIN11	1.10595	1.35e-19
AT2G37650	SCL9	1.10463	1.66e-24
AT3G12610	DRT100	1.10109	4.33e-114
AT1G08940	AT1G08940	1.10027	1.86e-28
AT3G25905	CLE27	1.09865	0.00358698
AT5G26030	HEM15	1.09832	1.35e-91
AT5G52510	SCL8	1.09818	4.03e-56
AT5G14780	FDH1	1.09774	3.99e-92
AT2G18150	PER15	1.09675	1.19e-44
AT3G03790	AT3G03790	1.09502	3.9e-81
AT2G38180	AT2G38180	1.09397	6.67e-19
AT2G37200	AT2G37200	1.09361	6.96e-37
AT1G70420	AT1G70420	1.09307	1.57e-18
AT5G13930	CHS	1.09236	4.72e-89
AT4G22780	ACR7	1.09075	9.57e-21
AT1G27350	AT1G27350	1.09018	4.28e-36
AT1G59910	FH7	1.08961	1.71e-49
AT4G12080	AHL1	1.08941	3.28e-46
AT4G27300	SD11	1.08935	8.77e-125
AT3G53600	AT3G53600	1.08932	0.00376633
AT3G25600	CML16	1.08921	2.67e-21
AT1G19180	TIFY10A	1.08816	1.21e-124
AT1G21520	AT1G21520	1.08723	3.07e-12
AT2G16790	AT2G16790	1.08712	4.81e-15
AT5G21105	AT5G21105	1.08667	4.99e-74
AT1G13620	RGF2	1.08637	0.0370306
AT5G40760	ACG12	1.08533	2.54e-90
AT5G17380	HACL	1.08497	1.14e-111
AT1G11670	AT1G11670	1.08418	3.93e-59
AT5G02220	AT5G02220	1.08412	0.00309983
AT5G05600	AT5G05600	1.0836	8.42e-106
AT3G51240	F3H	1.08338	6.48e-57
AT3G10300	CML49	1.08232	4.49e-49
AT5G23830	AT5G23830	1.0823	3.51e-57
AT4G02380	SAG21	1.08154	8.38e-81
AT4G33070	PDC1	1.08135	8.08e-117
AT5G17000	AT5G17000	1.08115	4.44e-86
AT1G61667	AT1G61667	1.08102	8.56e-18
AT1G21400	F24J8.4	1.08088	2.82e-66
AT1G20480	4CLL2	1.07972	2.53e-22
AT3G32040	AT3G32040	1.07937	2.53e-07
AT5G17860	CCX1	1.07936	7.62e-74
AT4G10270	AT4G10270	1.07861	7.94e-22
AT1G02890	AT1G02890	1.07819	6.3e-117
AT2G31680	RABA5D	1.07787	4.24e-33
AT3G56200	AT3G56200	1.07675	2.96e-105
AT2G31900	XI-F	1.07666	6.02e-25
AT2G39890	PROT1	1.07661	1.16e-74
AT2G40100	LHCB4.3	1.07638	8.77e-85
AT2G06005	FIP1	1.07481	3.55e-16
AT1G18570	MYB51	1.07453	4.46e-45
AT4G00330	CRCK2	1.07425	2.66e-61
AT2G26580	YAB5	1.07242	1.35e-53
AT3G24450	AT3G24450	1.07191	4.98e-08
AT4G23250	EMB1290	1.0716	9.37e-37
AT4G38540	AT4G38540	1.07069	1.07e-69
AT1G28360	ERF12	1.07051	0.000298305
AT5G53810	AT5G53810	1.06967	0.000463937
AT1G52400	BGLU18	1.06909	8.85e-219
AT3G46900	COPT2	1.06896	3.07e-35
AT5G35960	AT5G35960	1.06859	0.00589197
AT1G02305	AT1G02305	1.06815	1.31e-96
AT1G55550	AT1G55550	1.0681	6.3e-08
AT2G16990	AT2G16990	1.06709	3.42e-08
AT5G58390	PER67	1.06673	1.24e-56
AT4G18360	GLO5	1.06426	8.96e-43
AT4G00300	AT4G00300	1.06331	3.62e-90
AT1G77380	AAP3	1.06194	1.17e-24
AT5G21950	AT5G21950	1.0607	5.14e-10
AT4G31860	AT4G31860	1.05869	2.06e-55
AT1G02400	GA2OX6	1.05858	7.52e-08
AT1G13570	AT1G13570	1.05745	8.57e-49
AT3G56850	DPBF3	1.05554	2.26e-59
AT3G16150	AT3G16150	1.05496	1.08e-05
AT2G40030	NRPE1	1.05444	5.76e-44
AT3G02980	MCC1	1.05345	1.78e-09
AT5G65690	PCK2	1.05209	1.2e-18
AT3G53540	AT3G53540	1.05175	3.64e-64
AT3G51090	AT3G51090	1.05154	8.67e-22
AT2G36890	RAX2	1.05098	3.34e-18
AT5G15120	PCO1	1.05091	2.16e-66
AT5G25900	KO	1.05012	2.35e-65
AT4G21380	SD18	1.04997	3.2e-12
AT2G24600	AT2G24600	1.04984	2.77e-42
AT2G45290	TKL-2	1.04971	1.04e-84
AT4G36840	AT4G36840	1.04908	4.67e-13
AT2G39220	PLP6	1.04828	7.22e-33
AT2G29450	GSTU5	1.04716	1.11e-121
AT5G37660	CRRSP60	1.04708	4.14e-15
AT1G72790	AT1G72790	1.04603	3.08e-27
AT2G44578	AT2G44578	1.04596	0.00039467
AT2G37110	AT2G37110	1.04386	1.55e-84
AT3G16170	AAE13	1.04383	1.46e-41
AT2G40970	MYBC1	1.04336	1.18e-25
AT3G54200	AT3G54200	1.04167	1.08e-30
AT2G16900	AT2G16900	1.04101	2.2e-42
AT1G64060	RBOHF	1.03977	3.81e-48
AT4G18880	HSFA4A	1.03969	2.77e-35
AT1G14130	AT1G14130	1.03937	3.54e-30
AT4G16670	AT4G16670	1.03937	1.36e-23
AT3G09390	MT2A	1.03927	1.02e-15
AT3G02885	GASA5	1.03877	2.37e-29
AT5G65380	AT5G65380	1.03832	2.74e-79
AT3G60540	AT3G60540	1.0372	0.000146805
AT3G01050	MUB1	1.03661	5.47e-32
AT5G54960	PDC2	1.03608	5.14e-144
AT3G28480	P4H7	1.03603	9.61e-55
AT1G22260	ZYP1A	1.03571	2.35e-05
AT4G18020	APRR2	1.03429	4.68e-65
AT3G16510	AT3G16510	1.03409	4.88e-11
AT1G19790	SRS7	1.03187	0.000489018
AT1G59730	TRX7	1.03175	2.23e-07
AT2G17120	LYM2	1.03148	7.87e-28
AT3G17790	PAP17	1.03016	6.83e-117
AT5G18490	AT5G18490	1.03009	5.12e-46
AT4G28790	BHLH23	1.02917	1.52e-11
AT5G12880	AT5G12880	1.02693	5.13e-08
AT1G61820	BGLU46	1.02575	2.62e-41
AT4G24220	VEP1	1.02556	1.15e-107
AT1G64405	AT1G64405	1.02494	2.07e-06
AT1G72470	ATEXO70D1	1.02356	1.69e-30
AT5G08790	NAC081	1.02272	2.58e-142
AT5G62770	AT5G62770	1.02152	2.06e-09
AT5G51850	AT5G51850	1.02079	7.42e-06
AT3G04520	THA2	1.02058	4.01e-43
AT3G17050	AT3G17050	1.02022	2.37e-35
AT1G63750	AT1G63750	1.02004	2.14e-46
AT3G49350	AT3G49350	1.01993	1.18e-46
AT5G59570	BOA	1.01956	2.01e-09
AT2G05518	AT2G05518	1.01882	3.12e-07
AT5G62230	ERL1	1.01876	3.1e-12
AT1G15190	FLA19	1.01846	0.00126264
AT2G01430	ATHB-17	1.01792	4.19e-06
AT1G08930	ERD6	1.01717	3.76e-136
AT1G17190	GSTU26	1.01691	8.6e-29
AT4G15800	RALFL33	1.01513	1.97e-61
AT1G73040	JAL19	1.01475	5.28e-16
AT1G19770	PUP14	1.01277	2.59e-72
AT1G32928	AT1G32928	1.01266	3e-19
AT1G63350	AT1G63350	1.01261	4.04e-17
AT4G27840	AT4G27840	1.0123	5.41e-13
AT2G01420	PIN4	1.01223	8.31e-73
AT1G31355	AT1G31355	1.01211	0.000926353
AT4G19860	LCAT4	1.0107	6.16e-117
AT1G31460	AT1G31460	1.01055	2.78e-10
AT3G14395	AT3G14395	1.01011	0.0265046
AT3G11580	ARF32	1.00887	1.89e-12
AT3G52800	SAP6	1.0082	9.27e-94
AT5G24205	AT5G24205	1.00656	1.48e-05
AT4G00500	AT4G00500	1.00635	2.83e-44
AT2G16660	AT2G16660	1.0038	2.17e-67
AT1G65500	AT1G65500	1.00368	3.41e-09
AT4G17070	AT4G17070	1.00335	9.63e-37
AT5G65280	GCL1	1.003	2.36e-31
AT3G47965	AT3G47965	1.00176	2.68e-09
AT2G45680	TCP9	1.00174	2.48e-28
AT2G45400	BEN1	1.00104	8.63e-32
AT3G05290	PNC1	1.00007	1.92e-38

## Sheet: FUS3-GR-FLAG_up-GO
GO biological process complete	#	#	expected	Fold Enrichment	+/-	P value
defense response to nematode	6	5	0.4	12.61	+	0.0192
respiratory burst	6	5	0.4	12.61	+	0.0192
anaerobic respiration	9	6	0.59	10.09	+	0.0157
lipid storage	29	15	1.92	7.83	+	1.64e-07
nutrient storage	29	15	1.92	7.83	+	1.64e-07
isoprenoid catabolic process	25	11	1.65	6.66	+	0.000516
response to hypoxia	267	106	17.65	6.01	+	1.65e-51
response to decreased oxygen levels	271	106	17.91	5.92	+	9.4e-51
response to oxygen levels	273	106	18.04	5.87	+	2.21e-50
cellular response to salicylic acid stimulus	53	18	3.5	5.14	+	9.98e-06
glucosinolate catabolic process	30	10	1.98	5.04	+	0.0369
S-glycoside catabolic process	30	10	1.98	5.04	+	0.0369
salicylic acid mediated signaling pathway	46	15	3.04	4.93	+	0.00037
diterpenoid metabolic process	65	18	4.3	4.19	+	0.000359
seed maturation	70	18	4.63	3.89	+	0.00122
olefinic compound metabolic process	59	15	3.9	3.85	+	0.0127
response to salicylic acid	180	42	11.9	3.53	+	1.23e-09
response to jasmonic acid	197	45	13.02	3.46	+	4.11e-10
response to fatty acid	201	46	13.29	3.46	+	2.06e-10
response to wounding	272	62	17.98	3.45	+	1.21e-14
lipid catabolic process	115	26	7.6	3.42	+	6.71e-05
hydrocarbon metabolic process	77	17	5.09	3.34	+	0.024
hormone metabolic process	125	26	8.26	3.15	+	0.000401
plant organ senescence	128	26	8.46	3.07	+	0.000658
cellular response to chemical stimulus	1131	221	74.76	2.96	+	9.88e-47
response to fungus	388	76	25.65	2.96	+	2.35e-14
terpenoid metabolic process	180	35	11.9	2.94	+	1.95e-05
carboxylic acid catabolic process	154	29	10.18	2.85	+	0.000753
organic acid catabolic process	154	29	10.18	2.85	+	0.000753
defense response to fungus	280	52	18.51	2.81	+	2.96e-08
leaf senescence	120	22	7.93	2.77	+	0.031
detoxification	160	29	10.58	2.74	+	0.00173
response to bacterium	515	93	34.04	2.73	+	1.49e-15
response to ethylene	178	32	11.77	2.72	+	0.000567
terpenoid biosynthetic process	128	23	8.46	2.72	+	0.028
isoprenoid metabolic process	213	38	14.08	2.7	+	5.31e-05
response to external biotic stimulus	1213	212	80.17	2.64	+	9.22e-37
response to biotic stimulus	1216	212	80.37	2.64	+	1.36e-36
response to toxic substance	184	32	12.16	2.63	+	0.00123
secondary metabolic process	201	35	13.29	2.63	+	0.000353
response to oxidative stress	420	73	27.76	2.63	+	7.32e-11
biological process involved in interspecies interaction between organisms	1227	212	81.1	2.61	+	5.55e-36
response to reactive oxygen species	163	28	10.77	2.6	+	0.00807
defense response to bacterium	391	67	25.84	2.59	+	1.67e-09
defense response	1122	191	74.16	2.58	+	6.29e-31
regulation of response to biotic stimulus	248	41	16.39	2.5	+	0.000139
regulation of response to external stimulus	248	41	16.39	2.5	+	0.000139
immune system process	275	45	18.18	2.48	+	6.03e-05
isoprenoid biosynthetic process	159	26	10.51	2.47	+	0.0445
defense response to symbiont	248	40	16.39	2.44	+	0.000506
regulation of defense response	325	52	21.48	2.42	+	8.18e-06
response to external stimulus	1426	225	94.25	2.39	+	5.07e-32
response to chemical	2756	426	182.16	2.34	+	6.88e-64
immune response	234	36	15.47	2.33	+	0.00545
multicellular organismal reproductive process	202	31	13.35	2.32	+	0.0299
response to water deprivation	425	65	28.09	2.31	+	8.43e-07
response to water	438	67	28.95	2.31	+	4.18e-07
small molecule catabolic process	230	35	15.2	2.3	+	0.00956
regulation of response to stress	477	72	31.53	2.28	+	1.26e-07
regulation of hormone levels	279	42	18.44	2.28	+	0.00163
response to oxygen-containing compound	1603	237	105.95	2.24	+	2.03e-29
response to acid chemical	471	69	31.13	2.22	+	1.27e-06
cellular response to oxygen-containing compound	529	77	34.97	2.2	+	1.85e-07
response to lipid	912	132	60.28	2.19	+	3.39e-14
response to stress	3500	500	231.34	2.16	+	1.55e-65
response to abscisic acid	545	77	36.02	2.14	+	7.28e-07
response to osmotic stress	586	83	38.73	2.14	+	1.71e-07
response to alcohol	554	78	36.62	2.13	+	6.23e-07
cellular response to stress	1236	172	81.7	2.11	+	1.55e-17
cellular response to lipid	352	49	23.27	2.11	+	0.00201
response to abiotic stimulus	2275	308	150.37	2.05	+	3.3e-32
response to hormone	1399	190	92.47	2.05	+	2.62e-18
response to endogenous stimulus	1400	190	92.54	2.05	+	2.7e-18
response to salt stress	486	65	32.12	2.02	+	0.000154
cellular response to hormone stimulus	570	72	37.67	1.91	+	0.000361
cellular response to endogenous stimulus	571	72	37.74	1.91	+	0.000375
hormone-mediated signaling pathway	480	60	31.73	1.89	+	0.00693
response to stimulus	6027	738	398.36	1.85	+	7.71e-74
cellular response to stimulus	2864	340	189.3	1.8	+	1.14e-24
regulation of response to stimulus	937	109	61.93	1.76	+	2.44e-05
lipid metabolic process	907	103	59.95	1.72	+	0.000235
shoot system development	790	85	52.22	1.63	+	0.0301
positive regulation of biological process	1147	122	75.81	1.61	+	0.000546
oxoacid metabolic process	932	98	61.6	1.59	+	0.0163
organic acid metabolic process	933	98	61.67	1.59	+	0.0165
plant organ development	1156	115	76.41	1.51	+	0.0324
regulation of DNA-templated transcription	2046	204	135.23	1.51	+	5.48e-06
regulation of RNA biosynthetic process	2048	204	135.37	1.51	+	5.66e-06
regulation of RNA metabolic process	2150	207	142.11	1.46	+	8.18e-05
signal transduction	1609	152	106.35	1.43	+	0.0217
signaling	1653	156	109.26	1.43	+	0.0174
regulation of nucleobase-containing compound metabolic process	2244	212	148.32	1.43	+	0.0002
system development	2042	191	134.97	1.42	+	0.00228
cell communication	1682	157	111.17	1.41	+	0.0266
biological regulation	5860	531	387.33	1.37	+	5.83e-13
regulation of gene expression	2580	233	170.53	1.37	+	0.00182
regulation of biological process	5565	502	367.83	1.36	+	1.41e-11
regulation of macromolecule biosynthetic process	2620	234	173.17	1.35	+	0.0041
regulation of primary metabolic process	2536	227	167.62	1.35	+	0.00446
regulation of biosynthetic process	2770	245	183.09	1.34	+	0.0041
regulation of cellular process	5088	442	336.3	1.31	+	4.4e-07
regulation of macromolecule metabolic process	2791	241	184.48	1.31	+	0.0308
primary metabolic process	6589	340	435.51	0.78	-	7.58e-05

## Sheet: FUS3-GR-FLAG_down
ID	name	log2(FUS3-GR-FLAG_DEX/DMSO)	FDR
AT2G47880	GRXC13	-6.84031	8.8e-34
AT4G12320	CYP706A6	-5.19472	0
AT5G20630	GER3	-5.06146	0
AT2G21650	RL2	-4.95752	1.84e-85
AT4G29905	AT4G29905	-4.89334	0
AT2G39250	SNZ	-4.76113	3.72e-51
AT4G19170	CCD4	-4.71917	0
AT1G29720	RFK1	-4.64811	8.37e-89
AT5G60910	AGL8	-4.63671	2.87e-12
AT2G36590	PROT3	-4.26661	2.68e-17
AT1G02800	CEL2	-4.17916	2.26e-13
AT5G15500	AT5G15500	-4.12748	9.02e-27
AT4G21445	AT4G21445	-4.05743	4.89e-126
AT3G48360	BT2	-3.96587	0
AT3G24518	AT3G24518	-3.91365	6.42e-15
AT5G19970	AT5G19970	-3.91125	1.23e-18
AT1G25250	IDD16	-3.85108	1.94e-32
AT2G21140	PRP2	-3.84986	5.64e-232
AT3G51895	SULTR3	-3.83641	7.66e-110
AT1G23390	AT1G23390	-3.75582	0
AT4G16880	AT4G16880	-3.70398	3.21e-211
AT5G37300	WSD1	-3.69738	2.05e-07
AT1G65450	AT1G65450	-3.67617	5.28e-14
AT4G32340	AT4G32340	-3.65906	0
AT5G43290	WRKY49	-3.62086	7.71e-12
AT1G77960	AT1G77960	-3.61904	6.96e-27
AT1G78990	AT1G78990	-3.61478	4.42e-33
AT5G62360	AT5G62360	-3.59113	0
AT5G56550	OXS3	-3.58566	1.55e-194
AT5G19190	AT5G19190	-3.57995	3.65e-242
AT4G35160	AT4G35160	-3.48038	9.93e-39
AT1G54820	AT1G54820	-3.36422	2.28e-178
AT1G52800	AT1G52800	-3.35091	1.41e-16
AT1G06360	AT1G06360	-3.32535	2.75e-19
AT1G78440	GA2OX1	-3.28162	7.33e-06
AT1G66725	MIR163	-3.26159	2.84e-21
AT3G58070	GIS	-3.24874	3.16e-09
AT4G18960	AG	-3.24467	1.32e-06
AT3G45070	SOT5	-3.20861	1.64e-48
AT5G38120	4CLL8	-3.17622	6.34e-09
AT3G21670	NPF6.4	-3.11123	1.67e-107
AT5G45950	AT5G45950	-3.0857	1.91e-160
AT5G56840	AT5G56840	-3.04044	6.97e-59
AT2G39240	AT2G39240	-3.01222	8.12e-06
AT3G05800	BHLH150	-3.0027	1.08e-66
AT2G42900	AT2G42900	-2.97668	4.52e-32
AT4G18390	TCP2	-2.97222	1.22e-134
AT3G06070	AT3G06070	-2.9705	5.62e-63
AT4G39770	TPPH	-2.97021	3.8e-33
AT5G19170	AT5G19170	-2.96072	8.49e-13
AT1G09350	GOLS3	-2.95975	5.95e-09
AT5G65730	XTH6	-2.95581	2.18e-200
AT1G15550	GA3OX1	-2.92601	1.85e-45
AT3G53960	NPF5.7	-2.92515	1.7e-61
AT5G13730	SIGD	-2.90638	4.28e-216
AT1G02205	CER1	-2.90397	1.09e-84
AT2G22990	SCPL8	-2.90347	0
AT1G76610	AT1G76610	-2.90189	4.82e-06
AT1G65190	AT1G65190	-2.8954	1.21e-280
AT5G50950	FUM2	-2.86659	1.41e-233
AT1G69230	SP1L2	-2.86301	1.64e-18
AT2G32100	OFP16	-2.86192	4.85e-61
AT5G08070	TCP17	-2.85163	1.23e-10
AT2G14760	BHLH84	-2.84188	0.000151953
AT3G61060	PP2A13	-2.83242	7.88e-291
AT2G44930	AT2G44930	-2.82632	4.77e-11
AT2G40610	EXPA8	-2.8257	1.09e-74
AT5G54585	AT5G54585	-2.81849	2.26e-06
AT5G15160	PRE2	-2.81603	1.31e-15
AT4G16870	AT4G16870	-2.81499	3.89e-133
AT3G27920	GL1	-2.80823	5.5e-08
AT3G22142	AT3G22142	-2.80106	9.55e-46
AT5G23235	AT5G23235	-2.79922	5.87e-96
AT2G21370	XK-1	-2.77807	2.32e-116
AT2G03550	CXE7	-2.76793	1.32e-194
AT1G49500	AT1G49500	-2.75267	2.01e-151
AT4G38860	AT4G38860	-2.72487	8.52e-37
AT5G57780	AT5G57780	-2.71088	3.78e-29
AT3G23480	AT3G23480	-2.70923	5.93e-54
AT5G56860	GATA21	-2.69681	1.06e-100
AT4G25400	BHLH118	-2.68049	4.97e-06
AT5G06510	NFYA10	-2.68048	2.97e-46
AT5G38970	CYP85A1	-2.67339	1.44e-08
AT3G46270	AT3G46270	-2.6696	7.8e-13
AT5G20740	AT5G20740	-2.66753	8.97e-36
AT1G74810	BOR5	-2.65609	0.000293334
AT5G58360	OFP3	-2.64522	8.93e-06
AT2G32540	CSLB4	-2.64442	1.09e-52
AT1G63710	CYP86A7	-2.64341	3.39e-06
AT5G25990	AT5G25990	-2.62946	0.000124497
AT3G01500	BCA1	-2.62091	0
AT1G75460	AT1G75460	-2.61467	0
AT5G53200	TRY	-2.60823	0.000171047
AT3G62930	GRXS6	-2.60015	1.31e-27
AT4G14140	MET4	-2.59656	5.89e-06
AT2G18560	AT2G18560	-2.59386	1.26e-54
AT1G78030	AT1G78030	-2.57945	2.3e-05
AT1G70760	ndhL	-2.57785	4.05e-281
AT1G26230	CPN60B4	-2.57676	2.52e-135
AT1G71030	ATMYBL2	-2.5765	1.35e-181
AT5G24580	AT5G24580	-2.57307	1.45e-42
AT2G33810	SPL3	-2.57302	6.57e-16
AT5G44680	AT5G44680	-2.57273	1.62e-179
AT1G02065	SPL8	-2.57157	1.77e-11
AT3G22150	PCMP-E95	-2.56673	3.68e-218
AT5G63160	BT1	-2.56426	0
AT2G18328	RL4	-2.55395	8.18e-28
AT4G16540	AT4G16540	-2.54516	2e-14
AT1G08090	NRT2.1	-2.52429	1.26e-12
AT5G38420	RBCS-2B	-2.51064	0
AT2G29290	AT2G29290	-2.50954	4.06e-193
AT3G05936	AT3G05936	-2.4965	5.93e-22
AT2G22590	UGT91A1	-2.49425	4.39e-06
AT4G23990	CSLG3	-2.48832	1.04e-53
AT5G47610	ATL79	-2.47334	9e-24
AT4G23020	AT4G23020	-2.42832	2.07e-13
AT5G36150	PEN3	-2.42292	0.00149765
AT3G27690	LHCB2.4	-2.41998	0
AT1G11850	AT1G11850	-2.41941	5.53e-37
AT4G13410	CSLA15	-2.41938	2.47e-69
AT1G69120	AP1	-2.41787	0.00153446
AT2G32530	CSLB3	-2.41633	5.77e-42
AT1G79700	AT1G79700	-2.41202	1.4e-52
AT5G50160	FRO8	-2.40859	2.15e-273
AT3G18773	ATL77	-2.40541	7.04e-32
AT5G20935	AT5G20935	-2.40435	1.06e-44
AT5G25610	RD22	-2.40424	0
AT3G02940	MYB107	-2.40241	3.07e-05
AT3G01660	AT3G01660	-2.38165	2.21e-33
AT3G05690	NFYA2	-2.37544	2.46e-114
AT5G22390	AT5G22390	-2.36682	4.54e-37
AT4G15440	CYP74B2	-2.36412	3.43e-38
AT1G23200	PME6	-2.35533	2.98e-16
AT2G22190	TPPE	-2.35263	5.17e-64
AT1G10657	AT1G10657	-2.34981	1.71e-41
AT5G25980	TGG2	-2.34762	0
AT3G62410	CP12-2	-2.33811	9.48e-219
AT2G45600	CXE8	-2.33795	4.73e-14
AT3G16380	PAB6	-2.33631	9.64e-06
AT2G40130	AT2G40130	-2.3334	2.25e-29
AT4G23870	AT4G23870	-2.32285	1.46e-24
AT3G26960	AT3G26960	-2.31975	6.56e-14
AT3G50750	BEH1	-2.30258	7.3e-69
AT2G44340	VQ18	-2.30218	0.000517358
AT1G49130	COL8	-2.29883	2.95e-76
AT5G62040	BFT	-2.29038	0.00181355
AT1G29920	LHCB1.2	-2.2894	0
AT5G02540	AT5G02540	-2.28438	4.23e-18
AT4G00165	AT4G00165	-2.27019	4.06e-104
AT4G10910	AT4G10910	-2.26842	8.05e-08
AT5G43440	AT5G43440	-2.26599	8.13e-126
AT5G58910	LAC16	-2.26474	1.19e-07
AT1G24260	45903	-2.26072	5.74e-50
AT3G43670	AT3G43670	-2.2603	1.31e-188
AT4G32860	AT4G32860	-2.25556	3.6e-11
AT5G06790	AT5G06790	-2.25092	1.07e-12
AT4G04930	DES-1-LIKE	-2.24982	0.0033509
AT5G24150	SQE5	-2.24845	7.2e-80
AT1G31310	AT1G31310	-2.24652	3.02e-10
AT2G23600	MES2	-2.23484	3.33e-256
AT1G29670	AT1G29670	-2.23228	2.19e-305
AT1G49450	AT1G49450	-2.23195	4.98e-10
AT1G62660	BFRUCT3	-2.23018	4.63e-233
AT2G26695	AT2G26695	-2.23005	5.21e-33
AT1G18870	ICS2	-2.2281	5.11e-18
AT3G51400	AT3G51400	-2.21582	2.39e-21
AT5G67180	TOE3	-2.21567	4.86e-19
AT5G21100	AT5G21100	-2.20851	1.98e-88
AT1G25430	AT1G25430	-2.20056	0.00171284
AT3G61950	BHLH67	-2.19413	1.19e-08
AT4G35900	FD	-2.18948	2.75e-16
AT3G26460	AT3G26460	-2.17631	3.36e-20
AT3G15570	AT3G15570	-2.17582	1.1e-86
AT4G29610	CDA6	-2.17446	1.12e-22
AT4G30650	AT4G30650	-2.1718	1.23e-107
AT2G27920	SCPL51	-2.16651	2.6e-54
AT4G01490	AT4G01490	-2.1637	0.00130343
AT5G57630	CIPK21	-2.16306	7.29e-204
AT3G51080	GATA6	-2.14207	1.46e-19
AT4G17970	ALMT12	-2.14206	5.79e-58
AT5G63180	AT5G63180	-2.14142	3.09e-169
AT5G62140	AT5G62140	-2.13832	1.01e-77
AT1G14345	AT1G14345	-2.1382	2.31e-202
AT2G29120	GLR2.7	-2.1347	1.81e-37
AT1G49640	CXE3	-2.13006	0.000250938
AT2G14510	AT2G14510	-2.12986	9.58e-09
AT2G33180	AT2G33180	-2.12807	2.84e-92
AT2G15620	NIR1	-2.12533	0
AT5G43740	AT5G43740	-2.12184	2.45e-63
AT3G04290	LTL1	-2.12112	1.25e-233
AT3G53530	NAKR3	-2.12108	1.41e-33
AT4G09350	ndhT	-2.11789	8.02e-35
AT1G28230	PUP1	-2.11134	1.21e-42
AT5G44130	FLA13	-2.09664	4.59e-243
AT4G37420	AT4G37420	-2.09648	0.00641419
AT5G36120	CCB3	-2.0958	8.89e-66
AT2G28305	LOG1	-2.09213	1.2e-41
AT5G07760	FH21A	-2.08886	0.0013641
AT5G41900	AT5G41900	-2.07926	6.66e-13
AT3G46250	AT3G46250	-2.07863	0.00120955
AT1G70860	AT1G70860	-2.07653	0.00114613
AT4G03510	RMA1	-2.0721	3.5e-135
AT2G17880	AT2G17880	-2.06929	5.4e-54
AT1G47520	AT1G47520	-2.06696	1.26e-33
AT3G16670	AT3G16670	-2.06503	0
AT5G19600	SULTR3	-2.06399	6.37e-57
AT1G29600	AT1G29600	-2.06175	0.00094008
AT4G37610	BT5	-2.06108	1.57e-220
AT5G38060	AT5G38060	-2.06042	2.8e-20
AT5G54530	AT5G54530	-2.05506	4.6e-12
AT2G03310	AT2G03310	-2.05413	9.6e-45
AT4G15480	UGT84A1	-2.05226	1.98e-10
AT1G21670	AT1G21670	-2.04627	4.46e-87
AT4G26260	MIOX4	-2.0372	0.000497897
AT5G51720	NEET	-2.03631	5.56e-92
AT2G31083	CLE5	-2.0325	0.0030898
AT2G44920	AT2G44920	-2.03093	1.03e-117
AT1G64170	CHX16	-2.02836	5.52e-83
AT4G24540	AGL24	-2.02722	1.43e-33
AT2G36792	AT2G36792	-2.0271	1.43e-09
AT3G55700	UGT76F1	-2.02654	2.59e-06
AT3G22210	AT3G22210	-2.02094	1.82e-76
AT1G15360	WIN1	-2.01645	0.00882018
AT4G34220	AT4G34220	-2.01423	8.05e-116
AT4G14540	NFYB3	-2.01187	1.05e-69
AT2G25900	ATCTH	-2.00635	1.25e-155
AT4G20820	AT4G20820	-2.00184	4.39e-59
AT1G71015	AT1G71015	-2.00077	1.51e-14
AT3G48740	SWEET11	-1.99753	5.64e-300
AT4G17460	HAT1	-1.99752	8.96e-152
AT2G34610	AT2G34610	-1.99746	7.27e-06
AT5G54145	AT5G54145	-1.99678	8.66e-28
AT4G12270	AT4G12270	-1.99673	4.5e-07
AT1G10360	GSTU18	-1.99665	3.19e-99
AT1G20030	AT1G20030	-1.99554	4.15e-41
AT3G25770	AOC2	-1.9942	0
AT5G57660	COL5	-1.99297	3.88e-301
AT3G49760	AtbZIP5	-1.98895	3.05e-07
AT3G24420	AT3G24420	-1.98432	1.06e-14
AT3G13540	MYB5	-1.98428	0.00183813
AT5G46915	AT5G46915	-1.98344	0.00796197
AT1G45201	ATTLL1	-1.97951	0
AT2G28160	FIT	-1.97364	3.1e-12
AT1G22640	MYB3	-1.97064	4.87e-34
AT1G60600	ABC4	-1.96876	6.45e-140
AT4G34400	AT4G34400	-1.95802	6.88e-05
AT3G01060	AT3G01060	-1.95531	1.06e-115
AT1G78020	AT1G78020	-1.95301	5.68e-132
AT5G55570	AT5G55570	-1.95256	0.00140552
AT3G50685	AT3G50685	-1.95129	9.48e-59
AT3G56330	AT3G56330	-1.94979	6.33e-42
AT1G01320	AT1G01320	-1.94485	1.56e-280
AT3G52550	AT3G52550	-1.9447	0.000267754
AT4G12980	AT4G12980	-1.94393	7.76e-51
AT2G26820	PP2A3	-1.93594	2.06e-09
AT1G78450	AT1G78450	-1.93535	4.01e-35
AT4G26370	AT4G26370	-1.9323	2.22e-202
AT3G54730	AT3G54730	-1.92926	0.000910406
AT1G73830	BEE3	-1.92453	5.21e-57
AT5G07030	AT5G07030	-1.91831	1.19e-167
AT3G05180	AT3G05180	-1.91775	4.49e-48
AT5G18570	OBGL	-1.9159	8.7e-222
AT4G19690	IRT1	-1.91361	5.58e-14
AT5G27390	AT5G27390	-1.90461	1.6e-117
AT5G06480	AT5G06480	-1.90211	4.19e-05
AT4G01670	AT4G01670	-1.90022	1.77e-32
AT3G09540	AT3G09540	-1.89978	1.89e-25
AT5G38410	RBCS-3B	-1.89577	0
AT1G30280	AT1G30280	-1.89245	3.65e-35
AT4G12432	CPuORF26	-1.89089	2.55e-10
AT5G47330	AT5G47330	-1.89015	1.12e-10
AT3G51350	AT3G51350	-1.88573	9.25e-15
AT5G50740	AT5G50740	-1.88265	2.04e-50
AT1G77200	ERF037	-1.88124	1.38e-07
AT3G50450	HR1	-1.88094	0.0131954
AT3G49940	LBD38	-1.87752	4.1e-173
AT5G61440	ACHT5	-1.87669	5.05e-155
AT2G34620	AT2G34620	-1.87437	3.12e-104
AT5G67420	LBD37	-1.8728	6.71e-218
AT1G70560	TAA1	-1.87231	5.94e-35
AT1G45010	AT1G45010	-1.87184	1.03e-16
AT5G24470	APRR5	-1.86921	1.06e-180
AT4G33666	AT4G33666	-1.86783	3.03e-15
AT5G64490	APUM26	-1.86645	0.00197338
AT5G16030	AT5G16030	-1.86631	1.47e-166
AT1G51840	AT1G51840	-1.86354	7.81e-26
AT1G66940	AT1G66940	-1.86003	5.77e-111
AT3G28220	AT3G28220	-1.85744	1.72e-84
AT5G37260	RVE2	-1.85609	1.73e-70
AT1G68010	HPR	-1.85607	0
AT2G40460	NPF5.1	-1.85253	4.23e-77
AT5G49170	AT5G49170	-1.84793	7.29e-10
AT5G09820	PAP7	-1.84783	2.04e-67
AT5G08350	AT5G08350	-1.84634	5.89e-24
AT4G36870	BLH2	-1.84495	1.05e-68
AT2G34430	LHB1B1	-1.84474	0
AT4G24120	YSL1	-1.84463	3.89e-130
AT4G39330	CAD9	-1.84371	8.06e-185
AT1G13930	AT1G13930	-1.83697	0
AT4G34830	MRL1	-1.83614	6.27e-235
AT5G42250	AT5G42250	-1.83514	2.76e-65
AT5G09730	BXL3	-1.83452	0.00669775
AT5G51795	AT5G51795	-1.83308	3.11e-10
AT5G10170	IPS3	-1.83124	4.17e-136
AT1G52190	NPF1.2	-1.82507	1e-170
AT1G29395	COR413IM1	-1.82475	8.35e-75
AT4G36670	PLT6	-1.82283	2.43e-144
AT1G09850	XBCP3	-1.81672	3.96e-92
AT1G01390	UGT72B2	-1.81658	4.45e-13
AT5G04140	GLU1	-1.81534	0
AT5G54180	PTAC15	-1.81501	5.31e-50
AT3G15840	PIFI	-1.80876	0
AT2G18480	PLT3	-1.80839	2.46e-11
AT3G12930	IJ	-1.80798	4.51e-126
AT4G25050	ACP4	-1.80684	2.25e-206
AT2G28056	MIR172A	-1.80435	0.0191256
AT1G18835	MIF3	-1.80173	0.00614787
AT2G20670	AT2G20670	-1.79552	0
AT5G36140	CYP716A2	-1.79483	0.00320551
AT4G33980	AT4G33980	-1.79188	3.85e-101
AT3G48320	CYP71A21	-1.79133	2.81e-63
AT3G28070	AT3G28070	-1.79093	9.26e-79
AT4G38340	NLP3	-1.79044	2.92e-06
AT4G21760	BGLU47	-1.78237	6.73e-12
AT2G34640	PTAC12	-1.7761	3.17e-201
AT2G20180	PIF1	-1.77396	7.33e-60
AT4G12970	EPFL9	-1.76842	1.21e-27
AT2G14080	AT2G14080	-1.76673	1.54e-73
AT5G64380	AT5G64380	-1.76423	1.02e-55
AT1G12080	AT1G12080	-1.76249	9.21e-61
AT4G21280	PSBQ1	-1.76237	0
AT3G61510	ACS1	-1.75223	0.0228306
AT1G23090	SULTR3	-1.75002	2.11e-82
AT3G48280	CYP71A25	-1.74692	3.83e-29
AT2G03020	AT2G03020	-1.74326	0.0111693
AT3G50740	UGT72E1	-1.74264	1.94e-185
AT2G39730	RCA	-1.74176	0
AT2G44990	CCD7	-1.7415	0.0238876
AT3G18050	AT3G18050	-1.73964	2.99e-174
AT2G28250	NCRK	-1.73394	2.76e-52
AT4G11175	AT4G11175	-1.73338	3.5e-77
AT1G62630	AT1G62630	-1.73182	1.98e-44
AT5G04730	AT5G04730	-1.72963	0.00184441
AT4G10060	AT4G10060	-1.7293	6.32e-139
AT1G23130	AT1G23130	-1.72778	2.73e-298
AT3G04110	GLR1.1	-1.72301	7.19e-29
AT5G43750	PNSB5	-1.72287	2.46e-92
AT3G28007	SWEET4	-1.72021	8.7e-08
AT1G09240	NAS3	-1.71835	2.03e-78
AT3G52540	OFP18	-1.7121	2.33e-08
AT1G70700	TIFY7	-1.71162	3.35e-276
AT2G18969	AT2G18969	-1.70972	9.44e-07
AT1G76080	CDSP32	-1.70884	0
AT1G07610	MT1C	-1.70706	7.52e-90
AT3G26740	CCL	-1.70487	4.2e-220
AT4G13500	AT4G13500	-1.69984	5.3e-61
AT1G31330	PSAF	-1.69948	0
AT1G09750	AT1G09750	-1.6984	4.8e-25
AT1G31040	AT1G31040	-1.69519	1.4e-05
AT3G18010	WOX1	-1.69507	3.15e-06
AT1G61130	SCPL32	-1.69149	0.0152414
AT1G60950	FD2	-1.69131	1.04e-160
AT4G28080	AT4G28080	-1.69089	8.24e-156
AT5G25120	CYP71B11	-1.69052	5.99e-45
AT4G12830	AT4G12830	-1.68998	1.18e-62
AT1G64500	AT1G64500	-1.68572	9.59e-33
AT3G47620	TCP14	-1.68171	3.28e-63
AT5G02830	AT5G02830	-1.68031	7e-104
AT5G44255	AT5G44255	-1.67998	0.0195922
AT1G73090	AT1G73090	-1.67969	2.45e-37
AT4G29150	IQD25	-1.67825	2.63e-07
AT4G29110	AT4G29110	-1.67747	1.44e-12
AT4G00890	AT4G00890	-1.67597	3.18e-07
AT3G48730	GSA2	-1.67582	1.31e-251
AT2G26520	AT2G26520	-1.67391	2.99e-05
AT5G07152	AT5G07152	-1.67359	1.61e-05
AT3G50120	AT3G50120	-1.67124	5.93e-07
AT4G36220	CYP84A1	-1.67037	4.4e-107
AT3G26510	AT3G26510	-1.6703	1.7e-138
AT1G70020	AT1G70020	-1.66871	0.00119228
AT5G57170	AT5G57170	-1.66839	1.42e-38
AT3G27160	GHS1	-1.66683	7.04e-161
AT2G33855	AT2G33855	-1.66618	6.42e-40
AT1G12020	AT1G12020	-1.66605	8.24e-32
AT1G71866	EPFL7	-1.6658	0.00998403
AT1G68800	TCP12	-1.66504	0.0180387
AT3G09580	AT3G09580	-1.66482	3.05e-72
AT4G22570	APT3	-1.66479	1.42e-66
AT2G04790	AT2G04790	-1.66394	6.36e-27
AT3G08770	LTP6	-1.66189	5.29e-30
AT4G25420	GA20OX1	-1.65984	0.00260504
AT3G04140	AT3G04140	-1.65683	8e-30
AT3G01490	AT3G01490	-1.65682	1.34e-60
AT3G27650	LBD25	-1.65547	2.39e-11
AT1G49200	ATL75	-1.65341	3.07e-10
AT1G32450	NPF7.3	-1.64937	3.03e-155
AT5G52340	ATEXO70A2	-1.64845	0.000596392
AT5G59760	AT5G59760	-1.64768	0.000916893
AT4G34138	UGT73B1	-1.64755	3.73e-180
AT2G42690	AT2G42690	-1.64733	4.12e-205
AT5G11070	AT5G11070	-1.64192	2.18e-61
AT5G24490	AT5G24490	-1.63562	0
AT3G01480	CYP38	-1.63414	1.03e-304
AT1G43670	AT1G43670	-1.63119	2.86e-246
AT5G05630	RMV1	-1.62888	5.09e-07
AT4G36570	ATRL3	-1.62837	2.89e-18
AT3G06145	AT3G06145	-1.62776	8.03e-13
AT1G64680	AT1G64680	-1.62731	2e-142
AT3G55130	ABCG19	-1.62464	2.91e-100
AT1G03630	PORC	-1.62448	4.02e-239
AT1G58370	RXF12	-1.62104	7.78e-42
AT5G44005	AT5G44005	-1.61821	2.52e-22
AT2G37220	CP29B	-1.61791	0
AT2G33790	AGP30	-1.61763	4.89e-22
AT5G17165	AT5G17165	-1.61655	0.0095243
AT2G46820	CURT1B	-1.61466	3.23e-169
AT5G40390	RFS5	-1.61465	4.01e-89
AT3G04550	RAF2	-1.61431	1.18e-135
AT5G16410	AT5G16410	-1.60726	3.23e-07
AT5G46580	AT5G46580	-1.6069	1.4e-211
AT1G22370	UGT85A5	-1.60477	5.54e-24
AT3G15900	AT3G15900	-1.60305	3.66e-20
AT1G48100	AT1G48100	-1.59942	1.1e-17
AT5G21940	AT5G21940	-1.59875	4.22e-274
AT1G03020	GRXS1	-1.59667	8.69e-06
AT1G12860	SCRM2	-1.59482	8.99e-85
AT3G23530	AT3G23530	-1.59176	2.77e-97
AT1G51805	AT1G51805	-1.5895	9.26e-138
AT3G17640	AT3G17640	-1.58874	3.46e-14
AT5G38430	RBCS-1B	-1.58368	0
AT5G62350	AT5G62350	-1.58281	1.32e-299
AT5G38520	AT5G38520	-1.58232	4.02e-132
AT5G08650	AT5G08650	-1.5816	7.89e-172
AT5G14330	AT5G14330	-1.58011	1.62e-41
AT2G32180	PTAC18	-1.58011	2.63e-59
AT5G62720	AT5G62720	-1.57861	4.57e-279
AT1G10640	AT1G10640	-1.57789	4.04e-54
AT1G07180	NDA1	-1.57613	1.53e-29
AT3G25790	AT3G25790	-1.57521	3.62e-13
AT3G48460	AT3G48460	-1.57439	1.19e-26
AT1G73530	AT1G73530	-1.57151	4.38e-73
AT5G26220	AT5G26220	-1.57147	1.68e-73
AT4G25410	BHLH126	-1.57073	0.00600891
AT2G22980	SCPL13	-1.56962	8.09e-72
AT2G47890	COL13	-1.5691	1.16e-68
AT1G20990	AT1G20990	-1.56596	0.00189961
AT4G28850	XTH26	-1.56563	5.4e-26
AT5G21482	CKX7	-1.56495	6.51e-48
AT5G14360	AT5G14360	-1.5636	8.41e-07
AT5G59050	AT5G59050	-1.55784	2.88e-16
AT1G08380	PSAO	-1.55751	1.43e-164
AT1G68540	TKPR2	-1.55627	4.25e-18
AT3G63190	RRF	-1.55491	9.52e-210
AT2G01755	AT2G01755	-1.55469	2.66e-25
AT1G30050	AT1G30050	-1.55303	0.0268735
AT3G23700	AT3G23700	-1.55279	1.72e-144
AT5G27290	AT5G27290	-1.55207	6.37e-73
AT4G04330	AT4G04330	-1.55084	3.03e-46
AT1G49650	CXE4	-1.55057	1.54e-47
AT2G17300	AT2G17300	-1.54817	7.52e-20
AT5G50450	AT5G50450	-1.54351	3.5e-68
AT1G65870	DIR21	-1.54329	0.0161264
AT4G36240	GATA7	-1.54224	3.09e-14
AT3G16560	AT3G16560	-1.53923	5.41e-55
AT3G23810	SAHH2	-1.53561	1.7e-269
AT1G68610	PCR11	-1.53473	0.0449011
AT3G21760	UGT71B2	-1.53448	2.81e-08
AT1G31920	PCMP-H11	-1.53429	4.18e-22
AT1G03130	PSAD2	-1.53329	0
AT2G47240	LACS1	-1.53135	9.49e-153
AT2G34600	TIFY 5B	-1.53085	5.5e-27
AT5G61590	ERF107	-1.52598	9.36e-171
AT2G46100	AT2G46100	-1.52437	1.82e-71
AT5G52830	WRKY27	-1.52417	1.97e-19
AT2G40480	AT2G40480	-1.5228	3.32e-28
AT3G47430	PEX11B	-1.52014	5.24e-37
AT5G60970	TCP5	-1.52012	6.91e-16
AT5G42070	AT5G42070	-1.51919	1.59e-34
AT2G28605	PPD2	-1.51847	5.86e-46
AT1G66130	AT1G66130	-1.51654	1.75e-47
AT2G45660	SOC1	-1.51424	1.44e-43
AT2G34180	CIPK13	-1.5122	2.92e-13
AT2G18550	ATHB-21	-1.51194	0.0426729
AT5G13510	RPL10	-1.51185	2.4e-142
AT1G46552	AT1G46552	-1.51173	0.0131514
AT4G22960	AT4G22960	-1.51164	1.27e-05
AT1G02610	AT1G02610	-1.51139	1.06e-22
AT1G66190	AT1G66190	-1.51085	2.58e-12
AT5G63780	SHA1	-1.50966	1.61e-80
AT4G24510	CER2	-1.50808	7.72e-78
AT3G53720	CHX20	-1.50797	1.44e-33
AT5G05840	AT5G05840	-1.50392	6.37e-06
AT5G01881	AT5G01881	-1.50192	0.0110661
AT1G35250	AT1G35250	-1.50102	9.62e-05
AT5G50760	AT5G50760	-1.50062	1.7e-29
AT5G11420	AT5G11420	-1.49923	2.85e-113
AT5G48790	AT5G48790	-1.49708	1.06e-93
AT2G18350	ZHD6	-1.49615	7.03e-13
AT5G03680	PTL	-1.49612	7.48e-13
AT5G18600	GRXS2	-1.49542	2.91e-44
AT3G57540	AT3G57540	-1.49533	2.49e-09
AT1G32060	PRK	-1.4921	1.82e-182
AT4G37540	LBD39	-1.4878	3.93e-56
AT4G29020	AT4G29020	-1.4875	4.45e-91
AT3G52910	GRF4	-1.48588	3.23e-16
AT2G37640	EXPA3	-1.48458	4.29e-87
AT2G41560	ACA4	-1.48446	7.36e-168
AT3G53130	CYP97C1	-1.48346	1.01e-97
AT1G17140	ICR1	-1.48339	1.4e-65
AT2G45770	CPFTSY	-1.48295	2e-86
AT4G14400	ACD6	-1.47978	7.24e-69
AT3G54890	LHCA1	-1.47897	0
AT1G53800	AT1G53800	-1.47849	2.3e-97
AT1G62975	BHLH125	-1.47506	2.66e-07
AT5G55180	AT5G55180	-1.47499	6.63e-61
AT3G25760	AOC1	-1.47473	2.21e-247
AT3G63088	RTFL14	-1.47385	0.0140559
AT4G28250	EXPB3	-1.47207	6.22e-61
AT4G30720	AT4G30720	-1.46933	3.83e-99
AT1G11210	AT1G11210	-1.46924	4.56e-46
AT3G15760	AT3G15760	-1.46915	6.91e-15
AT1G67590	AT1G67590	-1.46759	1.2e-46
AT2G33830	AT2G33830	-1.46663	5.85e-102
AT3G13120	RPS10	-1.46659	2.04e-268
AT5G48490	AT5G48490	-1.46659	3.64e-09
AT3G49670	BAM2	-1.46397	2.4e-84
AT3G23410	FAO3	-1.46359	5.55e-75
AT1G67910	AT1G67910	-1.46222	1.57e-12
AT4G11140	CRF1	-1.4616	1.12e-06
AT2G34655	AT2G34655	-1.4607	1.97e-05
AT1G12240	BFRUCT4	-1.46058	4.75e-132
AT5G48900	AT5G48900	-1.45801	1.31e-40
AT5G23980	FRO4	-1.45797	8.13e-41
AT2G04270	RNE	-1.45677	4.21e-75
AT2G36540	AT2G36540	-1.45623	0.0397386
AT5G64040	PSAN	-1.45584	1.42e-119
AT1G25440	COL16	-1.45487	1.3e-123
AT4G14504	MIR852A	-1.45437	0.0199272
AT4G10780	AT4G10780	-1.45213	0.014896
AT2G16760	AT2G16760	-1.45137	3.39e-06
AT1G67870	AT1G67870	-1.4509	2.34e-251
AT3G62030	CYP20-3	-1.44901	1.38e-216
AT1G32990	RPL11	-1.44835	3e-136
AT3G16000	MFP1	-1.44824	2.19e-181
AT1G70200	AT1G70200	-1.44789	1.63e-117
AT5G47500	PME68	-1.44783	2.88e-56
AT3G46780	PTAC16	-1.44674	9.63e-199
AT3G13740	AT3G13740	-1.44277	3.8e-58
AT3G20300	AT3G20300	-1.44234	9.47e-29
AT1G65590	HEXO3	-1.44057	1.66e-62
AT4G16146	AT4G16146	-1.43705	1.42e-31
AT2G40435	AT2G40435	-1.43691	2.93e-06
AT4G12310	CYP706A5	-1.43185	6.5e-55
AT3G15353	MT3	-1.43174	3.1e-94
AT3G54050	FBP	-1.43068	9.91e-238
AT4G09650	ATPD	-1.42775	2.87e-287
AT3G16140	PSAH1	-1.42718	2.57e-168
AT4G37930	SHM1	-1.42689	0
AT1G23310	GGAT1	-1.42611	7.76e-224
AT2G34510	AT2G34510	-1.42318	3.74e-65
AT2G28780	AT2G28780	-1.42143	2.39e-23
AT4G28750	PSAE1	-1.42053	9.42e-228
AT4G24780	AT4G24780	-1.42052	1.93e-164
AT5G02120	HLIP	-1.42024	1.01e-59
AT3G13760	AT3G13760	-1.41745	3.9e-09
AT3G10520	AHB2	-1.41626	7.6e-101
AT4G15690	GRXS5	-1.416	5.51e-10
AT1G67195	MIR414	-1.41463	3.78e-22
AT5G57530	XTH12	-1.41455	7.8e-30
AT1G33811	AT1G33811	-1.41222	3.61e-74
AT3G09210	PTAC13	-1.41199	4.27e-119
AT5G64690	AT5G64690	-1.40871	0.000831408
AT1G60270	BGLU6	-1.40802	1.15e-26
AT4G34290	AT4G34290	-1.40743	1.3e-96
AT4G15320	ATCSLB06	-1.40729	0.00281894
AT4G14870	SECE1	-1.40575	6.19e-56
AT1G02950	GSTF4	-1.40489	1.11e-13
AT2G33450	RPL28	-1.4043	1.56e-127
AT1G22490	BHLH94	-1.40204	7.71e-10
AT1G06190	RHON1	-1.40146	1.04e-148
AT5G28770	BZIP63	-1.39956	2.79e-65
AT1G68520	COL6	-1.39856	1.44e-173
AT2G41680	NTRC	-1.39831	8.77e-109
AT1G58602	AT1G58602	-1.39778	4.02e-145
AT2G19800	MIOX2	-1.3974	1.86e-46
AT4G18290	KAT2	-1.39598	6.86e-20
AT5G41590	AT5G41590	-1.39414	0.0150595
AT5G44110	ABCI21	-1.39399	3.28e-43
AT4G33660	AT4G33660	-1.39339	4.09e-22
AT1G35830	AT1G35830	-1.39337	2.54e-11
AT5G50915	BHLH137	-1.3929	2.65e-14
AT5G14410	AT5G14410	-1.39215	1.11e-10
AT3G59040	AT3G59040	-1.39179	1.11e-100
AT2G30570	PSBW	-1.39167	2.6e-115
AT3G04260	PTAC3	-1.39036	1.4e-141
AT4G18740	AT4G18740	-1.39032	1.71e-30
AT5G03840	TFL1	-1.3903	0.00097103
AT4G01026	PYL7	-1.38931	5.68e-42
AT5G62840	AT5G62840	-1.3873	1.03e-31
AT3G50240	KICP-02	-1.38594	2.25e-51
AT3G56290	AT3G56290	-1.38449	6.89e-23
AT2G38152	AT2G38152	-1.38301	0.0174686
AT4G01150	CURT1A	-1.38129	2.72e-112
AT1G15140	AT1G15140	-1.3795	2.16e-103
AT1G42550	PMI1	-1.37895	1.69e-92
AT1G74730	AT1G74730	-1.37841	2.34e-68
AT1G30380	PSAK	-1.37695	7.09e-26
AT5G67370	AT5G67370	-1.37654	1.72e-61
AT4G27600	NARA5	-1.37433	2.55e-154
AT1G75690	LQY1	-1.37388	2.58e-144
AT5G52310	LTI78	-1.37335	8.65e-67
AT2G42800	AtRLP29	-1.37313	1.66e-06
AT5G64667	IDL2	-1.37204	0.00197998
AT1G51790	AT1G51790	-1.37059	1.89e-16
AT5G16540	ZFN3	-1.37017	1.11e-42
AT5G46900	AT5G46900	-1.36706	3.65e-10
AT4G09010	TL29	-1.36617	6.11e-216
AT4G32260	AT4G32260	-1.36583	3.99e-160
AT3G21055	PSBT	-1.36557	8e-25
AT3G59940	SKIP20	-1.36395	2.95e-153
AT3G52740	AT3G52740	-1.36194	9.04e-13
AT5G19730	PME53	-1.36158	1.01e-24
AT3G54210	RPL17	-1.35974	5.16e-216
AT3G49750	AtRLP44	-1.35964	2.38e-09
AT1G10470	ARR4	-1.35894	3.03e-81
AT4G13830	ATJ20	-1.35815	7e-70
AT1G66890	AT1G66890	-1.35769	1.43e-29
AT5G25810	TINY	-1.35721	1.73e-24
AT5G48460	FIM2	-1.35668	1.03e-28
AT1G32200	ATS1	-1.35589	7.4e-97
AT2G24540	AFR	-1.35576	0.000809697
AT1G80380	GLYK	-1.35574	1.77e-204
AT1G01610	GPAT4	-1.35538	1.24e-58
AT1G54040	ESP	-1.35433	1.59e-27
AT4G37510	AT4G37510	-1.35376	5.43e-167
AT3G53680	AT3G53680	-1.35267	1.17e-14
AT2G47940	DEGP2	-1.3521	2.9e-212
AT5G44575	AT5G44575	-1.35168	0.00305883
AT1G74070	CYP26-2	-1.35139	6.91e-85
AT5G61200	AT5G61200	-1.35133	2.15e-08
AT3G19030	AT3G19030	-1.35039	1.62e-46
AT3G26900	SKL1	-1.34973	1.21e-90
AT4G05120	ENT3	-1.34956	1.81e-14
AT4G14830	HSP1	-1.34939	1.41e-08
AT2G28950	EXPA6	-1.34934	1.04e-123
AT5G25160	ZFP3	-1.34773	2.72e-06
AT4G33010	GLDP1	-1.34717	1.65e-196
AT1G76110	HMGB9	-1.34455	4.75e-23
AT1G05530	UGT75B2	-1.34349	0.00309983
AT1G71020	PUB10	-1.34338	4.04e-72
AT5G59080	AT5G59080	-1.34217	2.34e-21
AT4G04640	ATPC1	-1.34192	0
AT1G22650	INVD	-1.34036	1.06e-17
AT1G58520	RXW8	-1.34002	6.09e-22
AT3G58830	AT3G58830	-1.3398	1.13e-37
AT5G07020	AT5G07020	-1.33966	9.38e-103
AT1G79510	AT1G79510	-1.33876	2.4e-26
AT3G10840	AT3G10840	-1.33829	2.5e-36
AT4G34190	45901	-1.33594	2.02e-82
AT1G68500	AT1G68500	-1.33543	4.63e-06
AT1G12900	GAPA2	-1.33505	1.8e-279
AT4G25830	AT4G25830	-1.33392	2.55e-16
AT2G21530	AT2G21530	-1.33379	7.97e-123
AT3G56940	CRD1	-1.33251	6.7e-166
AT5G65220	RPL29	-1.33054	8.96e-114
AT1G01380	ETC1	-1.33026	0.00909416
AT1G15510	PCMP-H73	-1.33002	1.57e-34
AT5G12860	DIT1	-1.32941	8.21e-129
AT1G76100	PETE	-1.32793	2.87e-143
AT3G60900	FLA10	-1.32766	1.27e-14
AT4G14040	SBP2	-1.32573	1.24e-199
AT1G42970	GAPB	-1.32485	0
AT5G52320	CYP96A4	-1.32437	5.19e-20
AT3G11930	AT3G11930	-1.32266	9.16e-126
AT4G39040	AT4G39040	-1.32127	2.5e-119
AT1G71720	AT1G71720	-1.32004	9.83e-74
AT3G49330	AT3G49330	-1.31953	0.00174081
AT5G51110	AT5G51110	-1.31862	6.3e-128
AT1G26600	CLE9	-1.31826	0.000663003
AT5G49450	BZIP1	-1.31674	3.33e-17
AT1G32550	FdC1	-1.31604	3.63e-39
AT1G70410	BCA4	-1.31577	2.79e-176
AT2G48020	AT2G48020	-1.31486	1.22e-45
AT5G43700	IAA4	-1.31413	2.53e-67
AT4G09510	CINV2	-1.31372	6.84e-50
AT5G08280	HEMC	-1.31294	6.26e-231
AT3G45160	AT3G45160	-1.31285	1.69e-40
AT3G51820	CHLG	-1.3115	1.64e-173
AT2G39670	AT2G39670	-1.31062	9.43e-111
AT3G60390	HAT3	-1.31007	5.33e-18
AT2G22540	SVP	-1.30953	2.29e-79
AT4G02290	AtGH9B13	-1.30637	2.94e-70
AT1G49010	AT1G49010	-1.30627	1.85e-46
AT5G52030	AT5G52030	-1.30525	2.17e-20
AT5G43760	KCS19	-1.30417	2.9e-85
AT1G49430	LACS2	-1.3029	5.76e-67
AT2G04842	EMB2761	-1.30207	1.35e-106
AT4G00370	PHT4	-1.29999	4.76e-134
AT5G43150	AT5G43150	-1.2998	1.65e-29
AT2G06520	PSBX	-1.29943	4.45e-85
AT5G51010	AT5G51010	-1.29856	4.16e-88
AT4G19120	ERD3	-1.29597	1.66e-92
AT3G10270	GYRB1	-1.29589	7.13e-76
AT3G04760	AT3G04760	-1.29515	8.39e-66
AT4G03280	PETC	-1.29262	8.3e-243
AT2G10940	AT2G10940	-1.29055	1.46e-82
AT3G51340	AT3G51340	-1.28778	0.000345016
AT5G15210	ZHD8	-1.28673	2.07e-37
AT3G57500	AT3G57500	-1.28601	0.00348164
AT1G47530	AT1G47530	-1.28546	1.29e-94
AT2G35260	AT2G35260	-1.28546	1.67e-160
AT4G30410	AT4G30410	-1.28253	1.99e-09
AT3G59400	GUN4	-1.28207	1.08e-76
AT1G20340	DRT112	-1.28148	8.27e-160
AT3G59780	AT3G59780	-1.28101	4.87e-148
AT1G67090	RBCS-1A	-1.27851	0
AT1G24470	KCR2	-1.27689	0.00138535
AT1G72500	AT1G72500	-1.27676	8.68e-65
AT2G05100	LHCB2.1	-1.27655	1.42e-269
AT4G30950	FAD6	-1.27638	1.5e-213
AT1G24148	AT1G24148	-1.27602	5.07e-17
AT1G14960	AT1G14960	-1.27576	6.29e-20
AT3G52480	AT3G52480	-1.27541	7.58e-11
AT2G39400	AT2G39400	-1.2748	2.15e-40
AT1G11545	XTH8	-1.27462	1.53e-42
AT3G10160	FPGS2	-1.27331	6.97e-97
AT5G63810	BGAL10	-1.27104	1.79e-56
AT3G50820	PSBO2	-1.27069	1.56e-186
AT4G39010	AtGH9B18	-1.27062	5.69e-05
AT3G63450	AT3G63450	-1.2706	1.28e-12
AT2G30150	UGT87A1	-1.26931	1.56e-19
AT3G52380	CP33	-1.269	1.15e-207
AT3G05410	PPD7	-1.26836	7.21e-40
AT4G23240	CRK16	-1.26833	0.000460939
AT2G01290	RPI2	-1.26827	1.33e-47
AT1G68830	STN7	-1.26826	2.69e-106
AT2G42200	SPL9	-1.26628	1.66e-07
AT1G79410	45935	-1.26584	2.83e-22
AT4G03400	DFL2	-1.26344	1.71e-40
AT3G61970	NGA2	-1.26172	0.000241088
AT5G41410	BEL1	-1.26086	8.26e-33
AT1G73655	FKBP17-3	-1.25992	2.13e-74
AT1G78290	SRK2C	-1.25861	9.43e-09
AT4G10340	LHCB5	-1.25791	9.96e-241
AT3G05600	AT3G05600	-1.25752	6.44e-15
AT3G48110	GLYRS-2	-1.25652	7.16e-104
AT1G13700	PGL1	-1.25582	3.79e-17
AT1G03700	AT1G03700	-1.25451	0.0107985
AT2G21860	AT2G21860	-1.25283	1e-83
AT2G36400	GRF3	-1.25184	5.81e-44
AT2G47370	AT2G47370	-1.25171	1.35e-05
AT1G21540	AEE9	-1.2515	5.4e-11
AT1G06680	PSBP1	-1.25005	3.34e-248
AT4G14940	ATAO1	-1.24988	3.15e-10
AT3G63110	IPT3	-1.24977	2.22e-26
AT4G35250	AT4G35250	-1.24854	4.4e-123
AT2G25830	AT2G25830	-1.24798	3.34e-85
AT1G05385	PSB27-2	-1.24788	8.68e-22
AT5G25040	AT5G25040	-1.24648	6.47e-28
AT3G12780	PGK1	-1.24611	1.94e-281
AT4G34980	SBT1.6	-1.24514	1.46e-52
AT1G21140	AT1G21140	-1.24492	2.07e-05
AT3G26650	GAPA1	-1.24322	1.78e-255
AT1G64355	AT1G64355	-1.24276	8e-31
AT3G13175	AT3G13175	-1.24272	1.17e-10
AT1G62480	AT1G62480	-1.24243	1.72e-62
AT5G43870	AT5G43870	-1.24242	1.34e-20
AT2G43910	HOL1	-1.24153	8.96e-183
AT5G39000	AT5G39000	-1.24047	0.0305091
AT5G08000	PDCB2	-1.23944	4.87e-25
AT1G06460	ACD32.1	-1.23847	1.14e-165
AT3G15520	CYP37	-1.2364	2.54e-60
AT4G11900	AT4G11900	-1.23521	1.5e-21
AT3G48500	PDE312	-1.23395	7.93e-132
AT1G55140	AT1G55140	-1.23329	6.84e-27
AT5G46690	BHLH71	-1.23175	1.02e-17
AT5G10470	KCA1	-1.22967	1.54e-74
AT4G33880	BHLH85	-1.22842	7.34e-09
AT2G35830	AT2G35830	-1.22762	5.4e-54
AT1G16410	CYP79F1	-1.22756	9.93e-167
AT4G25270	PCMP-E53	-1.22748	5.68e-16
AT5G50820	anac097	-1.22695	0.000109807
AT1G23205	AT1G23205	-1.22506	6.96e-09
AT2G40080	ELF4	-1.22449	9.38e-40
AT4G17100	AT4G17100	-1.22449	6.31e-107
AT5G43630	TZP	-1.22449	1.53e-57
AT3G07320	AT3G07320	-1.22419	4.28e-42
AT1G05310	PME8	-1.22216	1.18e-10
AT5G08150	SOB5	-1.22195	0.00345135
AT4G05180	PSBQ2	-1.22184	7.63e-255
AT5G11590	DREB3	-1.22123	0.0144107
AT3G30460	AT3G30460	-1.22046	0.0200624
AT2G04160	AIR3	-1.21973	1.13e-84
AT2G17033	AT2G17033	-1.21965	3.05e-58
AT4G28240	AT4G28240	-1.21908	5.3e-36
AT3G03680	AT3G03680	-1.21879	7.05e-18
AT3G48390	AT3G48390	-1.21877	1.51e-06
AT4G27520	ENODL2	-1.21839	1.08e-91
AT1G70290	TPS8	-1.21825	3.2e-175
AT1G67740	PSBY	-1.21821	1.33e-239
AT2G15820	OTP51	-1.21774	1.43e-41
AT5G22870	AT5G22870	-1.21682	0.00839668
AT1G04240	IAA3	-1.21648	8.86e-20
AT1G29390	COR413IM2	-1.2162	5.68e-49
AT4G38970	FBA2	-1.21581	2.48e-118
AT5G01420	AT5G01420	-1.21498	0.000413887
AT4G12800	PSAL	-1.21492	6.38e-281
AT3G54900	GRXS14	-1.21166	1.85e-64
AT2G31380	BBX25	-1.20834	3.38e-13
AT2G31940	AT2G31940	-1.20777	0.0129347
AT5G63050	EMB2759	-1.2077	6.73e-68
AT1G01030	NGA3	-1.2076	5.8e-05
AT3G46630	AT3G46630	-1.2073	5.77e-33
AT5G17460	AT5G17460	-1.20699	3.6e-21
AT2G30600	AT2G30600	-1.20663	5.2e-176
AT1G52870	AT1G52870	-1.20515	1.51e-87
AT5G20220	AT5G20220	-1.20507	7.72e-19
AT2G03750	SOT11	-1.20462	2.07e-56
AT5G48830	AT5G48830	-1.20364	2.35e-42
AT3G22420	WNK2	-1.20217	2.5e-18
AT2G20100	BHLH133	-1.20182	2.26e-11
AT3G08940	LHCB4.2	-1.20178	2.57e-241
AT2G37580	ATL33	-1.19962	2.29e-10
AT3G20830	UCNL	-1.199	1.11e-11
AT5G44520	RPI4	-1.19393	1.19e-34
AT1G30360	ERD4	-1.19305	5.91e-154
AT3G10120	AT3G10120	-1.19216	6.18e-13
AT2G38330	DTX44	-1.1919	4.95e-33
AT2G47500	AT2G47500	-1.18986	3.25e-42
AT5G59330	AT5G59330	-1.1893	0.00275403
AT5G67030	ZEP	-1.18857	4.05e-145
AT4G38840	AT4G38840	-1.18821	1.04e-12
AT4G35810	AT4G35810	-1.18781	0.00435669
AT2G37590	DOF2.4	-1.18455	1.73e-05
AT1G70430	AT1G70430	-1.18362	5.8e-07
AT5G35170	AT5G35170	-1.18345	4.15e-118
AT5G61420	MYB28	-1.18332	8.13e-67
AT2G20030	ATL12	-1.18234	0.00855135
AT3G06880	AT3G06880	-1.17941	3.15e-76
AT5G52250	RUP1	-1.1785	1.25e-10
AT5G14940	NPF5.8	-1.17809	4.41e-11
AT3G47500	CDF3	-1.17776	5.48e-22
AT5G49448	CPuORF4	-1.1767	5.24e-08
AT2G41990	AT2G41990	-1.17661	2.72e-08
AT2G24580	AT2G24580	-1.17625	4.99e-36
AT1G50320	ATHX	-1.17578	3.73e-84
AT1G61190	AT1G61190	-1.17543	2.82e-97
AT5G42130	MFL1	-1.17388	1.24e-53
AT1G50450	AT1G50450	-1.17349	3.34e-56
AT1G80630	AT1G80630	-1.17326	1.64e-15
AT3G01260	AT3G01260	-1.17318	9.64e-13
AT2G20250	AT2G20250	-1.17308	1.11e-05
AT1G66920	AT1G66920	-1.17263	1.71e-20
AT4G15450	AT4G15450	-1.17254	3.82e-15
AT1G51400	AT1G51400	-1.17157	4.06e-46
AT3G17130	AT3G17130	-1.17141	0.00227587
AT3G47470	LHCA4	-1.16965	4.55e-280
AT4G02770	PSAD1	-1.16905	2.24e-190
AT1G44000	SGRL	-1.16857	9.55e-51
AT3G43540	AT3G43540	-1.16793	4.85e-61
AT3G47860	CHL	-1.16743	8.99e-68
AT5G16190	CSLA11	-1.16696	2.86e-18
AT1G30820	AT1G30820	-1.16676	2.21e-79
AT2G43800	FH2	-1.16645	1.38e-27
AT1G77700	AT1G77700	-1.16555	4.72e-06
AT3G49900	AT3G49900	-1.16551	1.55e-07
AT2G46530	ARF11	-1.16383	8.65e-10
AT4G05100	AtMYB74	-1.16215	0.000834935
AT3G52060	AT3G52060	-1.16129	1.33e-72
AT5G13630	CHLH	-1.16062	1e-129
AT3G06130	AT3G06130	-1.15912	1.32e-41
AT4G40070	ATL32	-1.15905	7.57e-10
AT5G66790	WAKL21	-1.15888	2.82e-14
AT1G08980	AMI1	-1.1579	7.04e-82
AT1G30170	AT1G30170	-1.15768	0.00606013
AT4G18670	LRX5	-1.15544	2.4e-11
AT5G59200	PCMP-E41	-1.15278	0.000255345
AT3G01750	AT3G01750	-1.15215	2.37e-10
AT1G11080	SCPL31	-1.15196	7.74e-15
AT5G25210	AT5G25210	-1.1512	1.42e-18
AT1G54350	ABCC2	-1.15036	3.57e-45
AT2G32430	B3GALT3	-1.14805	2.51e-13
AT5G11620	AT5G11620	-1.14612	0.00207216
AT1G65310	XTH17	-1.14576	2.4e-13
AT3G25670	AT3G25670	-1.14519	0.00915751
AT4G11190	DIR13	-1.14487	1.44e-11
AT3G55040	GSTL2	-1.14436	1.45e-61
AT1G63100	SCL28	-1.14429	2.18e-21
AT5G60680	AT5G60680	-1.14362	3.74e-99
AT3G53700	MEE40	-1.13999	6.12e-35
AT4G14210	PDS	-1.1396	9.72e-106
AT5G59990	AT5G59990	-1.13914	0.00298746
AT1G11260	STP1	-1.13888	1.53e-67
AT5G16600	MYB43	-1.13876	6.45e-06
AT5G61950	AT5G61950	-1.13832	9.87e-10
AT5G58580	ATL63	-1.13813	3e-07
AT1G79600	AT1G79600	-1.13731	6.9e-77
AT2G26550	HO2	-1.13687	5.01e-21
AT3G52110	AT3G52110	-1.13646	1.76e-20
AT1G51355	AT1G51355	-1.13635	0.0131572
AT5G23730	RUP2	-1.13615	9.72e-10
AT3G50630	KRP2	-1.13462	1.34e-14
AT3G49160	PKP4	-1.13458	3.81e-18
AT1G30110	NUDT25	-1.13406	1.04e-16
AT4G17695	KAN3	-1.13404	4.25e-09
AT4G36530	AT4G36530	-1.13385	5.88e-51
AT3G56810	AT3G56810	-1.13349	2.74e-14
AT4G16860	RPP4	-1.13283	1.69e-118
AT3G07970	QRT2	-1.13254	0.000452194
AT5G42240	SCPL42	-1.13223	2.04e-48
AT4G37470	KAI2	-1.13206	2.35e-58
AT3G14110	FLU	-1.13187	1.8e-95
AT2G17240	AT2G17240	-1.13082	3.53e-38
AT1G32160	AT1G32160	-1.13066	5.6e-71
AT5G17040	UGT78D4	-1.13048	2.51e-05
AT1G10960	FD1	-1.12989	6.88e-108
AT3G20015	ASPG2	-1.12849	2.41e-29
AT5G38300	AT5G38300	-1.12735	3.05e-07
AT5G25240	AT5G25240	-1.12713	1.84e-09
AT3G48240	AT3G48240	-1.12636	0.0051127
AT3G25805	AT3G25805	-1.12382	2.59e-36
AT4G33170	PCMP-H53	-1.12308	7.22e-05
AT5G11550	AT5G11550	-1.1221	3.42e-26
AT1G80310	MOT2	-1.12123	2.7e-35
AT4G36970	AT4G36970	-1.1209	2.99e-49
AT1G19340	AT1G19340	-1.1208	7.44e-06
AT3G02660	emb2768	-1.11987	3.18e-46
AT5G51820	PGMP	-1.11981	5.26e-153
AT3G06080	TBL10	-1.11708	2.19e-50
AT1G22630	AT1G22630	-1.11704	8.02e-25
AT5G62630	HIPL2	-1.11555	1.18e-29
AT1G27660	BHLH110	-1.11484	6.38e-10
AT5G54290	CCDA	-1.11399	3e-42
AT4G25080	CHLM	-1.11338	1.53e-135
AT5G46890	AT5G46890	-1.11181	2.98e-09
AT1G60390	PG1	-1.1112	8.47e-16
AT2G25090	CIPK16	-1.11098	1.64e-06
AT2G46860	PPA3	-1.11089	5.72e-08
AT4G09460	MYB6	-1.11046	2.26e-18
AT4G21210	RP1	-1.11013	9.62e-78
AT1G65480	FT	-1.10862	0.047132
AT1G79040	PSBR	-1.10779	1.75e-97
AT3G10150	PAP16	-1.10758	5.33e-05
AT3G14420	GLO1	-1.10696	2.09e-172
AT1G64390	AtGH9C2	-1.10624	8.39e-76
AT3G55290	AT3G55290	-1.1054	7.01e-14
AT3G20230	AT3G20230	-1.10522	1.09e-74
AT4G37890	EDA40	-1.10512	3.11e-07
AT1G78580	TPS1	-1.10385	3.3e-44
AT3G15030	TCP4	-1.10346	2.58e-26
AT5G53030	AT5G53030	-1.10187	1.87e-05
AT4G01840	TPK5	-1.09913	1.74e-12
AT1G68585	AT1G68585	-1.09838	1.71e-09
AT4G27560	UGT79B2	-1.09751	3.13e-54
AT3G19370	AT3G19370	-1.09718	4.72e-50
AT4G13600	AT4G13600	-1.09637	0.00290827
AT3G61470	LHCA2	-1.0953	4.65e-211
AT3G21200	GLUTRBP	-1.09405	2.52e-76
AT4G24790	F22K18.10	-1.09391	1.64e-15
AT4G20240	CYP71A27	-1.09327	2.01e-22
AT5G20250	RFS6	-1.09305	2.67e-177
AT1G11160	AT1G11160	-1.09128	1.06e-09
AT4G30620	AT4G30620	-1.09081	6.33e-35
AT1G20620	CAT3	-1.08981	1.37e-104
AT1G05140	ARASP2	-1.0898	5.34e-50
AT3G01600	anac044	-1.08965	1.78e-15
AT1G17950	ATMYB52	-1.08911	0.00947223
AT4G34620	SSR16	-1.08884	1.31e-48
AT5G11060	KNAT4	-1.08873	9.91e-29
AT3G06120	MUTE	-1.08728	0.00502892
AT2G23390	AT2G23390	-1.0869	2.19e-64
AT5G43020	AT5G43020	-1.08673	3.12e-21
AT1G17700	PRA1F1	-1.08623	9.23e-05
AT5G61410	RPE	-1.08603	4.14e-193
AT5G10930	CIPK5	-1.08525	4.11e-12
AT1G79840	GL2	-1.08372	8.35e-14
AT3G18200	AT3G18200	-1.08346	1.32e-08
AT3G50790	AT3G50790	-1.08247	2.58e-45
AT1G64360	AT1G64360	-1.07971	1.04e-05
AT5G56080	NAS2	-1.07964	0.00877033
AT1G21590	AT1G21590	-1.07924	4.53e-40
AT5G26820	IREG3	-1.07876	2.8e-64
AT5G38780	AT5G38780	-1.07819	3.38e-06
AT5G21050	AT5G21050	-1.07784	0.00406834
AT3G24560	RSY3	-1.07713	3.89e-10
AT1G80340	GA3OX2	-1.07708	0.00759239
AT1G80480	PTAC17	-1.07668	2.65e-85
AT2G15890	MEE14	-1.07602	1.51e-121
AT1G27360	SPL11	-1.07597	2.31e-09
AT1G76450	PPD3	-1.07579	6.46e-77
AT5G24165	AT5G24165	-1.0756	1.32e-34
AT3G05890	RCI2B	-1.07538	6.74e-20
AT3G62680	PRP3	-1.07521	3.26e-26
AT5G59350	AT5G59350	-1.07456	7.66e-14
AT5G39473	AT5G39473	-1.07449	0.0444104
AT3G02370	AT3G02370	-1.07331	0.00025633
AT4G22190	AT4G22190	-1.07251	5.36e-26
AT4G29080	IAA27	-1.07215	3.79e-24
AT5G60100	APRR3	-1.07192	1.3e-40
AT1G29930	LHCB1.3	-1.07102	2.22e-112
AT1G08990	GUX5	-1.07008	6.57e-10
AT1G71870	AT1G71870	-1.06803	8.21e-13
AT5G64860	DPE1	-1.06752	7.98e-96
AT4G31470	AT4G31470	-1.06751	0.00155571
AT1G73360	HDG11	-1.06545	1.28e-05
AT3G57770	AT3G57770	-1.06468	1.36e-07
AT2G04080	DTXL3	-1.06407	5.53e-22
AT3G56620	AT3G56620	-1.06226	6.05e-12
AT3G25410	BASS3	-1.06194	7.78e-44
AT5G66640	DAR3	-1.06194	0.000106818
AT1G18330	RVE7	-1.06153	9.04e-29
AT1G21130	AT1G21130	-1.06091	1.21e-137
AT4G33960	AT4G33960	-1.06033	1.32e-13
AT1G13250	GATL3	-1.05949	1.28e-27
AT1G21680	AT1G21680	-1.05931	5.7e-76
AT5G16710	DHAR3	-1.05884	4.47e-109
AT2G17450	ATL44	-1.05878	4.42e-37
AT1G20840	MSSP1	-1.05835	3.75e-46
AT1G11380	AT1G11380	-1.05828	1.74e-21
AT3G50350	AT3G50350	-1.05665	1.08e-09
AT1G06645	AT1G06645	-1.05661	1.73e-13
AT3G11570	TBL8	-1.05518	0.000471182
AT1G49840	AT1G49840	-1.05363	8.61e-15
AT4G32710	PERK14	-1.05341	5.07e-13
AT3G01670	SEOA	-1.05126	4.05e-37
AT2G28870	AT2G28870	-1.05114	0.000371647
AT5G51810	GA20OX2	-1.04992	0.00503727
AT5G12130	PDE149	-1.04826	5.89e-40
AT5G27930	PPC6-7	-1.04755	7.33e-39
AT1G14270	AT1G14270	-1.04739	3.38e-45
AT5G07690	MYB29	-1.04704	2.43e-19
AT3G62390	TBL6	-1.04639	2.29e-17
AT4G19030	NIP1-1	-1.04631	2.66e-30
AT4G11360	RHA1B	-1.04559	3.58e-27
AT5G59500	AT5G59500	-1.04435	1.32e-47
AT5G38990	AT5G38990	-1.04299	1.04e-38
AT2G30420	ETC2	-1.04256	0.0375375
AT5G57350	AHA3	-1.04177	2.67e-108
AT1G64480	CBL8	-1.04124	0.00834854
AT2G02060	AT2G02060	-1.04082	9.94e-07
AT1G30260	AT1G30260	-1.04055	3.85e-08
AT3G26580	AT3G26580	-1.03967	5.14e-82
AT5G24105	AGP41	-1.03939	1.21e-06
AT3G50700	IDD2	-1.03784	2.76e-17
AT4G27800	PPH1	-1.03654	1.39e-120
AT5G24270	CBL4	-1.03616	1.94e-10
AT1G03160	FZL	-1.0359	3.26e-68
AT5G23070	AT5G23070	-1.03576	2.03e-27
AT4G17000	AT4G17000	-1.03549	1.49e-12
AT3G28080	AT3G28080	-1.03357	4.94e-20
AT3G21780	UGT71B6	-1.03342	3.99e-06
AT5G08720	AT5G08720	-1.03289	3.35e-32
AT4G29590	AT4G29590	-1.03283	3.55e-42
AT2G28800	ALB3	-1.03243	3.8e-122
AT2G38270	GRXS16	-1.03233	2.54e-54
AT1G78950	BAS	-1.03217	0.000122178
AT4G38810	AT4G38810	-1.0316	1.69e-43
AT5G51390	AT5G51390	-1.03125	1.43e-05
AT4G29720	PAO5	-1.03123	4.58e-32
AT1G11180	SCAMP5	-1.03078	7.99e-17
AT5G47640	NFYB2	-1.03071	4.87e-24
AT3G44450	AT3G44450	-1.03027	4.36e-13
AT5G44190	GLK2	-1.02825	2.78e-44
AT3G19450	CAD4	-1.02799	4.41e-76
AT5G50800	SWEET13	-1.02717	5.82e-05
AT5G67440	NPY3	-1.02683	9.66e-19
AT3G14330	PCMP-H57	-1.02631	2.36e-21
AT5G14210	AT5G14210	-1.0262	3.03e-32
AT5G09760	PME51	-1.02616	1.17e-22
AT1G80920	ATJ8	-1.0261	7.95e-79
AT5G10150	UFC	-1.02566	6.27e-14
AT3G13000	AT3G13000	-1.0256	1.18e-13
AT3G48550	AT3G48550	-1.02438	0.000592391
AT5G57540	XTH13	-1.02392	5.16e-10
AT2G20340	ELI5	-1.02349	3.45e-19
AT4G33180	AT4G33180	-1.02291	2.28e-16
AT3G45140	LOX2	-1.01905	2.57e-74
AT3G57190	PRFB3	-1.01828	3.21e-22
AT1G56500	AT1G56500	-1.0177	3.05e-98
AT1G65710	AT1G65710	-1.01753	3.66e-08
AT4G08910	AT4G08910	-1.01583	0.0376884
AT5G13410	FKBP19	-1.01563	7.79e-25
AT2G38230	PDX11	-1.01483	1.27e-76
AT1G75240	ZHD5	-1.01461	3.87e-18
AT5G02890	AT5G02890	-1.01202	2.8e-14
AT1G44110	CYCA1-1	-1.01102	6.4e-16
AT4G25940	AT4G25940	-1.0109	7.46e-27
AT4G24240	WRKY7	-1.01077	2.99e-44
AT5G02940	AT5G02940	-1.01074	6.8e-121
AT3G63200	PLP9	-1.00962	1.11e-33
AT4G14690	ELIP2	-1.00957	0.000117943
AT1G20390	AT1G20390	-1.00913	4.73e-07
AT3G63370	OTP86	-1.0083	1.21e-09
AT1G60000	AT1G60000	-1.00788	7.46e-72
AT5G51910	TCP19	-1.00728	7.12e-05
AT1G26920	AT1G26920	-1.00662	5.05e-37
AT2G29660	AT2G29660	-1.00483	3.18e-18
AT4G04750	AT4G04750	-1.00475	3.07e-12
AT2G43010	PIF4	-1.0038	2e-37
AT5G51600	MAP65-3	-1.00276	7.26e-24
AT2G30790	PSBP2	-1.00149	7.99e-07
AT3G59340	AT3G59340	-1.00128	0.00519163
AT4G01080	TBL26	-1.00063	8.16e-07

## Sheet: FUS3-GR-FLAG_down-GO
GO biological process complete	#	#	expected	Fold Enrichment	+/-	P value
reductive pentose-phosphate cycle	7	5	0.27	18.38	+	0.00466
photosynthesis, dark reaction	8	5	0.31	16.08	+	0.012
carbon fixation	8	5	0.31	16.08	+	0.012
ribulose bisphosphate carboxylase complex assembly	9	5	0.35	14.29	+	0.0262
photosynthesis, light harvesting in photosystem I	23	12	0.89	13.42	+	2.75e-08
photosynthesis, light harvesting	43	15	1.67	8.97	+	9.33e-08
chloroplast rRNA processing	24	8	0.93	8.58	+	0.00578
photosynthetic electron transport chain	47	15	1.83	8.21	+	4e-07
wax metabolic process	30	9	1.17	7.72	+	0.00361
chloroplast RNA processing	28	8	1.09	7.35	+	0.0213
photosynthesis	190	54	7.39	7.31	+	3.74e-28
wax biosynthetic process	29	8	1.13	7.1	+	0.0283
photosynthesis, light reaction	133	36	5.17	6.96	+	2.86e-17
response to red light	75	20	2.92	6.86	+	1.48e-08
chlorophyll biosynthetic process	39	10	1.52	6.6	+	0.00463
tetrapyrrole biosynthetic process	53	12	2.06	5.82	+	0.00184
response to high light intensity	68	15	2.64	5.67	+	0.00011
glucose metabolic process	46	10	1.79	5.59	+	0.0232
porphyrin-containing compound biosynthetic process	49	10	1.9	5.25	+	0.0421
regulation of photosynthesis	49	10	1.9	5.25	+	0.0421
tetrapyrrole metabolic process	79	13	3.07	4.23	+	0.0283
circadian rhythm	125	19	4.86	3.91	+	0.001
rhythmic process	125	19	4.86	3.91	+	0.001
electron transport chain	119	18	4.63	3.89	+	0.00218
pigment biosynthetic process	107	16	4.16	3.85	+	0.0103
response to gibberellin	137	20	5.33	3.76	+	0.000976
response to light intensity	164	23	6.37	3.61	+	0.000282
pigment metabolic process	136	18	5.29	3.4	+	0.0155
response to light stimulus	789	98	30.67	3.2	+	4.66e-21
response to red or far red light	227	28	8.82	3.17	+	0.000203
response to radiation	810	98	31.49	3.11	+	3.37e-20
generation of precursor metabolites and energy	394	47	15.32	3.07	+	2.74e-08
cellular response to abiotic stimulus	203	24	7.89	3.04	+	0.00367
cellular response to environmental stimulus	203	24	7.89	3.04	+	0.00367
response to cold	436	50	16.95	2.95	+	2.58e-08
plastid organization	318	34	12.36	2.75	+	0.0003
chloroplast organization	243	25	9.45	2.65	+	0.0274
response to temperature stimulus	705	67	27.4	2.44	+	4.86e-08
response to abiotic stimulus	2275	179	88.43	2.02	+	1.16e-16
carbohydrate metabolic process	886	65	34.44	1.89	+	0.00354
regulation of RNA biosynthetic process	2048	140	79.61	1.76	+	1.59e-07
regulation of DNA-templated transcription	2046	139	79.53	1.75	+	2.38e-07
response to oxygen-containing compound	1603	108	62.31	1.73	+	6.48e-05
regulation of RNA metabolic process	2150	143	83.57	1.71	+	6.33e-07
regulation of nucleobase-containing compound metabolic process	2244	144	87.23	1.65	+	6.18e-06
regulation of primary metabolic process	2536	159	98.58	1.61	+	3.25e-06
small molecule metabolic process	1454	90	56.52	1.59	+	0.0367
regulation of biosynthetic process	2770	168	107.67	1.56	+	1.38e-05
regulation of metabolic process	3093	185	120.23	1.54	+	4.99e-06
regulation of macromolecule biosynthetic process	2620	157	101.84	1.54	+	0.0001
regulation of gene expression	2580	154	100.29	1.54	+	0.000199
response to chemical	2756	164	107.13	1.53	+	8.19e-05
regulation of macromolecule metabolic process	2791	159	108.49	1.47	+	0.00221
response to stimulus	6027	321	234.28	1.37	+	7.09e-07
