# Supplementary material for: A FUS3-VAL transcriptional negative feedback circuit terminates seed maturation program and safeguards vegetative development
Source: Research Square preprint supplement (doi:10.21203/rs.3.rs-7986565/v1), 2025-11-12
Supplement: Supplementary file 9 [file c44a7e785be3b6da0f66dfb2.xlsx]

## Sheet: val1 val2-ne vs WT
up							down
ID	name	log2Folc Change	p vaule	FDR			ID	name	log2Folc Change	p vaule	FDR
AT4G28520	CRC	15.1929	0	0			AT4G34410	ERF109	-10.5162	0	0
AT4G27170	AT2S4	13.9464	0	0			AT1G30135	TIFY5A	-9.12308	3.86159e-228	1.21242e-226
AT4G27160	AT2S3	13.5379	0	0			AT1G12610	DREB1F	-8.90677	2.63272e-244	9.00537e-243
AT1G03880	CRB	12.5588	6.00432e-302	2.68465e-300			AT2G34600	TIFY 5B	-8.37731	0	0
AT5G54740	SESA5	12.5081	5.81604e-293	2.52554e-291			AT4G27654	AT4G27654	-7.96777	6.88069e-145	1.37507e-143
AT5G44120	CRA1	12.2073	0	0			AT5G52020	ERF025	-7.71817	0	0
AT4G25140	OLEO1	12.1494	6.03462e-293	2.61602e-291			AT3G43740	AT3G43740	-7.46537	2.00031e-221	6.05769e-220
AT4G27150	AT2S2	12.1057	0	0			AT5G21960	ERF016	-7.42148	1.75586e-46	1.23926e-45
AT1G47540	ATTI7	11.8194	3.77458e-207	1.05e-205			AT1G19210	ERF017	-7.34137	1.30104e-146	2.62668e-145
AT2G28490	AT2G28490	11.659	3.95087e-214	1.14894e-212			AT3G48520	CYP94B3	-7.31424	0	0
AT5G40420	OLEO2	11.3135	2.72762e-252	9.73283e-251			AT4G26260	MIOX4	-7.25952	1.32602e-304	5.98112e-303
AT4G36700	AT4G36700	10.6143	8.88387e-163	1.98955e-161			AT1G76640	CML39	-6.89809	2.10084e-123	3.54569e-122
AT3G54940	AT3G54940	10.4892	1.25614e-158	2.74126e-157			AT1G63030	DREB1E	-6.48916	1.65336e-56	1.37485e-55
AT1G74140	AT1G74140	10.3958	9.34124e-153	1.95525e-151			AT1G23935	AT1G23935	-6.38954	2.24437e-41	1.46015e-40
AT1G65090	AT1G65090	10.2881	1.84642e-150	3.81802e-149			AT2G25460	AT2G25460	-6.27352	0	0
AT4G27140	AT2S1	10.275	0	0			AT3G22830	HSFA6B	-6.26797	5.04171e-252	1.79152e-250
AT1G04660	AT1G04660	9.8685	1.29993e-228	4.09142e-227			AT1G28480	GRXC9	-6.11216	0	0
AT1G04560	AT1G04560	9.74655	6.98122e-211	1.98953e-209			AT2G24130	AT2G24130	-6.08559	1.89769e-46	1.33862e-45
AT2G15010	AT2G15010	9.52128	4.7326e-156	1.01125e-154			AT2G17660	AT2G17660	-6.0484	2.11061e-165	4.80228e-164
AT4G26740	PXG1	9.4908	1.12536e-172	2.65974e-171			AT2G05995	AT2G05995	-5.98134	5.88749e-26	2.75754e-25
AT1G13609	AT1G13609	9.36372	2.58757e-137	4.90336e-136			AT1G17380	TIFY11A	-5.88621	0	0
AT1G54860	AT1G54860	9.33106	2.872e-107	4.23608e-106			AT1G18300	NUDT4	-5.87598	0	0
AT3G63040	AT3G63040	9.27123	3.6789e-102	5.14484e-101			AT4G25470	DREB1C	-5.81437	1.31697e-193	3.44293e-192
AT1G54870	AT1G54870	9.16059	5.35812e-175	1.28055e-173			AT4G13395	DVL10	-5.78195	0	0
AT5G45690	AT5G45690	9.15584	2.11349e-113	3.28167e-112			AT5G62520	SRO5	-5.71859	0	0
AT4G31900	PKR2	9.0522	5.71756e-145	1.1444e-143			AT5G52050	AT5G52050	-5.71213	0	0
AT3G56350	MSD2	9.05124	8.54643e-109	1.28047e-107			AT3G01830	CML40	-5.66128	0	0
AT5G22470	PARP3	9.04827	1.18977e-109	1.79517e-108			AT5G43650	BHLH92	-5.63503	5.69597e-51	4.33672e-50
AT4G19690	IRT1	8.99617	1.79553e-101	2.49195e-100			AT4G29780	AT4G29780	-5.62253	0	0
AT3G51810	EM1	8.97205	2.75352e-150	5.68913e-149			AT4G01360	AT4G01360	-5.61483	3.50257e-300	1.55252e-298
AT1G78500	PEN6	8.92046	2.85615e-133	5.20445e-132			AT1G56660	AT1G56660	-5.57328	0	0
AT2G44470	BGLU29	8.91636	1.80979e-101	2.51039e-100			AT3G45960	EXLA3	-5.55867	1.76412e-288	7.50778e-287
AT1G75830	PDF1.1	8.841	1.81301e-111	2.77143e-110			AT4G27652	AT4G27652	-5.47486	0	0
AT3G15670	AT3G15670	8.80227	4.03768e-173	9.56942e-172			AT1G76650	CML38	-5.44226	0	0
AT2G34700	AT2G34700	8.77627	3.37716e-140	6.51036e-139			AT1G22980	AT1G22980	-5.43448	5.09475e-23	2.21196e-22
AT5G34851	AT5G34851	8.75837	1.72287e-123	2.9116e-122			AT3G16860	COBL8	-5.38372	0	0
AT2G41260	M17	8.73088	2.6083e-105	3.75631e-104			AT4G13310	CYP71A20	-5.31828	1.11186e-92	1.41509e-91
AT4G35650	IDH3	8.72083	2.19254e-131	3.93642e-130			AT1G74930	ERF018	-5.28583	0	0
AT3G17520	AT3G17520	8.69083	2.3894e-160	5.27274e-159			AT5G17350	AT5G17350	-5.27559	0	0
AT1G03106	AT1G03106	8.66786	0	0			AT1G09950	RAS1	-5.26177	4.92877e-48	3.57821e-47
AT3G21370	BGLU19	8.64885	3.36269e-111	5.1281e-110			AT5G42380	CML37	-5.22828	0	0
AT5G24130	AT5G24130	8.61949	1.53909e-128	2.70821e-127			AT4G36950	MAPKKK21	-5.22689	1.14161e-61	1.0191e-60
AT4G34520	FAE1	8.61832	9.61044e-84	1.10561e-82			AT5G23780	DUF9	-5.20694	9.78931e-22	4.10411e-21
AT5G62800	AT5G62800	8.54382	2.97729e-92	3.77055e-91			AT2G22760	BHLH19	-5.20465	2.64676e-40	1.69187e-39
AT5G01300	AT5G01300	8.52136	3.15192e-92	3.98973e-91			AT3G46370	AT3G46370	-5.1443	5.58575e-121	9.22081e-120
AT1G48470	GLN1-5	8.48938	5.21471e-124	8.86536e-123			AT5G51990	DREB1D	-5.01001	2.07735e-16	7.36938e-16
AT4G21020	AT4G21020	8.45933	4.38553e-147	8.88902e-146			AT3G30122	AT3G30122	-4.96811	9.97421e-73	1.02012e-71
AT1G17810	TIP3-2	8.42845	2.5373e-298	1.11886e-296			AT1G35140	EXL1	-4.9253	0	0
AT5G55240	PXG2	8.42248	1.53068e-89	1.87637e-88			AT3G49160	PKP4	-4.91979	0	0
AT4G33820	AT4G33820	8.41199	1.84944e-91	2.3261e-90			AT2G30040	MAPKKK14	-4.87846	0	0
AT2G18540	AT2G18540	8.4105	1.17913e-110	1.78753e-109			AT5G48400	GLR1.2	-4.87117	2.96794e-66	2.82252e-65
AT3G24650	ABI3	8.31335	7.50258e-138	1.42488e-136			AT1G36070	AT1G36070	-4.86484	1.3282e-242	4.49518e-241
AT2G20800	NDB4	8.31175	2.28193e-91	2.86724e-90			AT1G17610	AT1G17610	-4.85697	9.70243e-41	6.25035e-40
AT1G60570	AT1G60570	8.24781	4.31586e-84	5.01008e-83			AT3G44120	AT3G44120	-4.84847	6.6173e-38	4.02888e-37
AT4G03050	AOP3	8.1922	2.95257e-78	3.20665e-77			AT2G14290	AT2G14290	-4.8459	5.2099e-18	1.94915e-17
AT1G67100	LBD40	8.14395	2.65984e-93	3.41751e-92			AT2G30020	AT2G30020	-4.80588	0	0
AT1G03890	CRD	8.12294	4.42296e-48	3.21282e-47			AT1G23940	AT1G23940	-4.78423	2.45688e-29	1.2504e-28
AT2G23640	RTNLB13	8.09792	4.05321e-69	3.97714e-68			AT3G43850	AT3G43850	-4.78294	1.32767e-19	5.19786e-19
AT1G73190	TIP3-1	8.05689	0	0			AT4G35985	AT4G35985	-4.77354	0	0
AT1G65330	PHE1	8.0422	2.01078e-136	3.78239e-135			AT5G45050	WRKY16	-4.68681	0	0
AT3G12470	AT3G12470	8.01366	1.63902e-101	2.27598e-100			AT5G28335	AT5G28335	-4.67353	2.31232e-24	1.04097e-23
AT5G08695	AT5G08695	8.00658	6.92279e-81	7.7181e-80			AT5G23770	DUF8	-4.60782	5.21681e-44	3.52465e-43
AT1G68250	AT1G68250	8.0035	0	0			AT4G13572	AT4G13572	-4.60053	7.81182e-15	2.61585e-14
AT3G12203	SCPL17	7.99251	1.47516e-164	3.35049e-163			AT5G45060	AT5G45060	-4.5572	0	0
AT5G50700	HSD1	7.99173	0	0			AT5G37072	AT5G37072	-4.54886	1.15449e-14	3.84678e-14
AT4G21370	PSEUDOSRKA	7.97409	9.27117e-85	1.08361e-83			AT4G13575	AT4G13575	-4.54708	1.37262e-26	6.53896e-26
AT5G51210	OL3	7.81355	2.48557e-285	1.04737e-283			AT1G73910	ARP4A	-4.47752	1.40274e-17	5.18215e-17
AT1G53480	MRD1	7.81285	5.72032e-106	8.29397e-105			AT5G45220	AT5G45220	-4.45288	1.34346e-32	7.36719e-32
AT1G77655	AT1G77655	7.81216	2.01747e-76	2.13939e-75			AT1G73540	NUDT21	-4.44815	0	0
AT5G44360	AT5G44360	7.78492	3.50903e-68	3.41311e-67			AT1G19180	TIFY10A	-4.43903	0	0
AT1G27461	AT1G27461	7.76249	8.8894e-89	1.08193e-87			AT1G10160	AT1G10160	-4.43606	7.13571e-116	1.1285e-114
AT2G05580	AT2G05580	7.74868	0	0			AT2G27080	AT2G27080	-4.43187	0	0
AT2G42560	AT2G42560	7.74449	2.40994e-96	3.18097e-95			AT1G74450	AT1G74450	-4.41828	0	0
AT1G16705	AT1G16705	7.71479	9.22528e-196	2.4291e-194			AT5G62240	AT5G62240	-4.40427	6.46388e-21	2.63786e-20
AT4G31830	AT4G31830	7.70797	1.41768e-68	1.38366e-67			AT5G08150	SOB5	-4.39081	2.71543e-148	5.53456e-147
AT5G50600	HSD1	7.67851	0	0			AT4G11280	ACS6	-4.36027	0	0
AT1G07645	ATDSI-1VOC	7.64925	2.09531e-72	2.13362e-71			AT5G59820	ZAT12	-4.35191	0	0
AT2G21720	AT2G21720	7.56927	2.65866e-69	2.61779e-68			AT1G80840	WRKY40	-4.33457	0	0
AT1G05510	AT1G05510	7.52018	5.73183e-176	1.37887e-174			AT5G20240	PI	-4.29982	2.24311e-172	5.29175e-171
AT5G38160	AT5G38160	7.49684	5.29968e-64	4.89996e-63			AT3G44860	FAMT	-4.28674	3.23801e-42	2.13698e-41
AT2G23510	SDT	7.49121	1.44987e-61	1.29068e-60			AT4G15990	AT4G15990	-4.27116	2.08337e-183	5.22781e-182
AT1G32560	AT1G32560	7.48718	5.38467e-118	8.67098e-117			AT1G77640	ERF013	-4.26153	7.85846e-273	3.1118e-271
AT1G48990	AT1G48990	7.45768	8.48525e-67	8.12377e-66			AT3G29375	AT3G29375	-4.25615	3.39264e-156	7.26145e-155
AT4G39130	AT4G39130	7.42605	9.57343e-64	8.82271e-63			AT1G61890	AT1G61890	-4.25392	0	0
AT5G07190	ATS3	7.3717	0	0			AT2G45930	AT2G45930	-4.22423	2.20473e-12	6.74773e-12
AT4G09600	GASA3	7.36243	2.86398e-68	2.78781e-67			AT3G23250	MYB15	-4.2102	4.79819e-213	1.38434e-211
AT5G59310	LTP4	7.31527	6.5808e-113	1.01689e-111			AT3G20600	NDR1	-4.19841	0	0
AT1G77950	AGL67	7.29809	7.62211e-75	7.94138e-74			AT3G46080	ZAT8	-4.18212	1.97019e-121	3.26285e-120
AT4G31940	CYP82C4	7.29065	9.82412e-49	7.19948e-48			AT2G03710	AGL3	-4.17992	1.19237e-194	3.12997e-193
AT3G58450	AT3G58450	7.21519	1.00098e-61	8.94178e-61			AT3G23100	XRCC4	-4.15652	5.2092e-138	9.90058e-137
AT5G35660	AT5G35660	7.18591	4.06338e-69	3.9856e-68			AT5G56370	AT5G56370	-4.14773	8.0003e-54	6.39325e-53
AT3G21380	JAL36	7.18316	5.93656e-68	5.75462e-67			AT4G17180	AT4G17180	-4.13841	5.2785e-77	5.65838e-76
AT3G02480	AT3G02480	7.07752	1.85454e-183	4.66274e-182			AT1G11185	AT1G11185	-4.127	6.53504e-179	1.59455e-177
AT5G07550	GRP19	7.07087	9.55988e-95	1.23949e-93			AT5G38700	AT5G38700	-4.11765	1.41272e-152	2.94739e-151
AT3G20210	dVPE	7.05899	2.37458e-56	1.96946e-55			AT1G66100	AT1G66100	-4.11115	1.3792e-65	1.30388e-64
AT4G10020	HSD5	7.03093	1.20817e-236	3.97346e-235			AT4G37850	BHLH25	-4.10829	9.12461e-24	4.04661e-23
AT3G25080	AT3G25080	7.0273	1.5452e-55	1.26804e-54			AT2G26380	AT2G26380	-4.08498	2.27038e-35	1.316e-34
AT5G62490	HVA22B	7.02436	2.6521e-77	2.85611e-76			AT2G24850	TAT3	-4.07049	2.57625e-79	2.83034e-78
AT5G45980	WOX8	6.99382	1.38352e-50	1.04622e-49			AT2G41640	AT2G41640	-4.06691	0	0
AT2G27380	EPR1	6.98151	4.22371e-73	4.33192e-72			AT1G01560	MPK11	-4.05057	8.48663e-154	1.78805e-152
AT2G36640	ATECP63	6.95975	1.0155e-135	1.89491e-134			AT1G50750	AT1G50750	-4.04736	0	0
AT1G48660	AT1G48660	6.92481	4.57177e-58	3.87203e-57			AT3G07195	AT3G07195	-4.04453	0	0
AT1G48800	TPS28	6.91345	8.7563e-59	7.49037e-58			AT2G30280	RDM4	-4.04061	2.5179e-212	7.23191e-211
AT5G03820	AT5G03820	6.90749	4.33287e-51	3.30479e-50			AT5G58680	AT5G58680	-4.00351	2.04905e-164	4.64162e-163
AT4G18900	AT4G18900	6.90736	4.76203e-96	6.26943e-95			AT2G18210	AT2G18210	-3.99808	1.28819e-191	3.34721e-190
AT3G24250	AT3G24250	6.84187	4.96579e-52	3.8471e-51			AT3G14160	AT3G14160	-3.99238	6.44379e-118	1.037e-116
AT4G36600	AT4G36600	6.83109	1.47517e-59	1.27252e-58			AT1G02620	AT1G02620	-3.97872	2.42463e-125	4.16906e-124
AT5G54000	AT5G54000	6.76284	5.82653e-54	4.66778e-53			AT4G35655	AT4G35655	-3.9777	3.42499e-11	9.94654e-11
AT2G25890	AT2G25890	6.75991	2.12873e-133	3.88172e-132			AT1G18740	AT1G18740	-3.9725	0	0
AT5G44220	AT5G44220	6.72871	2.39879e-57	2.01499e-56			AT4G08040	ACS11	-3.96759	3.6757e-118	5.93019e-117
AT3G22640	PAP85	6.72277	0	0			AT3G23170	AT3G23170	-3.96181	0	0
AT2G34870	MEE26	6.70497	2.89292e-61	2.56193e-60			AT5G62165	AGL42	-3.95137	8.41457e-46	5.86456e-45
AT1G27990	AT1G27990	6.66395	1.58907e-65	1.50118e-64			AT1G17420	LOX3	-3.92967	0	0
AT4G18650	AT4G18650	6.65739	2.70922e-43	1.81512e-42			AT4G17500	ERF1A	-3.92874	0	0
AT5G55410	AT5G55410	6.6546	4.39143e-57	3.67795e-56			AT1G03340	AT1G03340	-3.91999	1.91145e-09	5.10224e-09
AT1G72100	AT1G72100	6.61957	2.9371e-94	3.79277e-93			AT1G32640	MYC2	-3.91039	0	0
AT4G01985	AT4G01985	6.59419	5.88421e-154	1.24179e-152			AT5G13700	PAO1	-3.90553	2.83148e-125	4.86209e-124
AT3G05300	AT3G05300	6.5922	2.36395e-50	1.7813e-49			AT5G45150	RTL3	-3.9019	4.55634e-27	2.19961e-26
AT1G32710	AT1G32710	6.57313	2.34046e-47	1.67868e-46			AT2G35290	AT2G35290	-3.89352	0	0
AT3G15280	AT3G15280	6.5647	6.21215e-47	4.4259e-46			AT4G08100	AT4G08100	-3.89142	5.7504e-41	3.72222e-40
AT3G01570	AT3G01570	6.54372	0	0			AT3G62260	AT3G62260	-3.88536	0	0
AT1G49330	AT1G49330	6.5129	9.87999e-74	1.01984e-72			AT4G31380	FLP1	-3.8741	2.00929e-26	9.52414e-26
AT4G18330	AT4G18330	6.50307	1.44714e-50	1.09368e-49			AT2G35930	PUB23	-3.87103	0	0
AT2G41360	AT2G41360	6.49529	4.41506e-45	3.04479e-44			AT3G57260	BG2	-3.86407	8.24373e-32	4.4352e-31
AT3G54530	AT3G54530	6.48657	1.12508e-41	7.35694e-41			AT3G02840	AT3G02840	-3.85719	0	0
AT4G11040	AT4G11040	6.47057	2.28114e-82	2.5757e-81			AT1G72520	LOX4	-3.83982	0	0
AT2G26010	PDF1.3	6.42316	2.21959e-182	5.52633e-181			AT4G08950	EXO	-3.83573	0	0
AT5G50360	AT5G50360	6.41994	4.82436e-104	6.86287e-103			AT1G52920	GCR2	-3.83038	5.21487e-10	1.42969e-09
AT1G70260	AT1G70260	6.40939	1.38214e-52	1.08189e-51			AT3G22275	AT3G22275	-3.82033	2.29591e-34	1.30743e-33
AT2G18460	LCV3	6.32497	4.06397e-66	3.85911e-65			AT2G02310	PP2B6	-3.81383	5.69155e-09	1.48234e-08
AT2G38905	AT2G38905	6.31731	1.0398e-42	6.90324e-42			AT4G13560	UNE15	-3.81192	1.86299e-09	4.97341e-09
AT3G23060	AT3G23060	6.30315	1.14873e-113	1.78692e-112			AT4G08115	AT4G08115	-3.80514	8.63642e-43	5.74267e-42
AT2G40220	ABI4	6.29922	1.41852e-40	9.11299e-40			AT3G46090	ZAT7	-3.79332	0	0
AT1G52690	AT1G52690	6.29336	6.53158e-194	1.70929e-192			AT3G26815	MIR169K	-3.78684	1.24833e-09	3.36549e-09
AT3G29385	AT3G29385	6.27829	4.34759e-39	2.70878e-38			AT5G28610	AT5G28610	-3.76888	1.50556e-95	1.96999e-94
AT1G20925	AT1G20925	6.21851	7.13653e-106	1.03415e-104			AT5G66640	DAR3	-3.75185	6.68433e-140	1.28568e-138
AT1G12805	AT1G12805	6.20405	2.38427e-84	2.77659e-83			AT1G72450	TIFY11B	-3.74906	0	0
AT3G18570	AT3G18570	6.20115	1.07694e-56	8.98443e-56			AT1G22480	AT1G22480	-3.746	4.21686e-09	1.105e-08
AT1G21860	sks7	6.19856	3.2257e-58	2.73741e-57			AT2G16190	AT2G16190	-3.74473	8.4767e-11	2.41679e-10
AT3G61340	AT3G61340	6.19614	4.23296e-105	6.08919e-104			AT3G44260	CAF1-9	-3.73536	0	0
AT5G04380	AT5G04380	6.19559	6.54152e-40	4.14631e-39			AT3G16650	PRL2	-3.73463	1.16462e-37	7.04879e-37
AT2G41280	M10	6.15334	2.75886e-100	3.78789e-99			AT1G63040	AT1G63040	-3.72919	1.64292e-37	9.91324e-37
AT3G57620	AT3G57620	6.13332	7.0822e-38	4.30783e-37			AT1G29740	AT1G29740	-3.71752	3.21554e-14	1.05213e-13
AT4G25330	AT4G25330	6.1229	1.17793e-53	9.38679e-53			AT1G15010	AT1G15010	-3.71191	1.60781e-112	2.47698e-111
AT1G28640	AT1G28640	6.10264	3.53512e-39	2.20848e-38			AT3G63350	HSFA7B	-3.69801	5.22293e-09	1.36236e-08
AT5G16460	AT5G16460	6.09722	4.24685e-39	2.6473e-38			AT2G22860	PSK2	-3.69076	0	0
AT5G04500	AT5G04500	6.09682	2.59955e-40	1.66293e-39			AT3G43790	ZIFL2	-3.66989	2.07284e-105	2.98853e-104
AT1G23070	AT1G23070	6.08979	6.32721e-40	4.01146e-39			AT5G37000	AT5G37000	-3.65736	7.5019e-55	6.08802e-54
AT5G21150	AGO9	6.06882	0	0			AT3G23240	ERF1B	-3.65631	2.98423e-30	1.55272e-29
AT2G33520	AT2G33520	6.05601	8.80863e-66	8.34604e-65			AT1G66760	AT1G66760	-3.65543	0	0
AT2G41470	AT2G41470	6.05397	1.47451e-72	1.50445e-71			AT5G57560	XTH22	-3.63602	0	0
AT3G28890	AtRLP43	6.05225	2.51155e-112	3.86462e-111			AT2G35075	AT2G35075	-3.6296	1.78822e-09	4.77779e-09
AT3G21720	ICL	6.04939	0	0			AT5G64905	PEP3	-3.62668	1.13e-64	1.05697e-63
AT5G34871	AT5G34871	6.0475	8.50315e-36	4.96017e-35			AT1G58320	PCR9	-3.6259	1.98053e-09	5.28225e-09
AT4G10850	SWEET7	6.00975	1.76004e-31	9.41774e-31			AT1G17600	AT1G17600	-3.62111	9.34391e-46	6.50519e-45
AT1G65880	AAE20	6.00899	1.5247e-30	7.97851e-30			AT1G78070	AT1G78070	-3.62043	0	0
AT5G53240	AT5G53240	6.00251	6.82163e-38	4.15131e-37			AT5G47850	CCR4	-3.61517	1.13672e-25	5.28543e-25
AT3G05260	AT3G05260	6.00073	3.55558e-64	3.29334e-63			AT1G28370	ERF11	-3.61182	0	0
AT5G44310	AT5G44310	6.00042	9.69623e-245	3.32553e-243			AT1G21910	ERF012	-3.61109	0	0
AT5G07500	PEI1	5.99588	1.31018e-92	1.66585e-91			AT3G55980	SZF1	-3.60998	0	0
AT2G39510	AT2G39510	5.96798	2.35209e-123	3.9645e-122			AT4G24380	AT4G24380	-3.60164	0	0
AT5G24950	CYP71A15	5.95773	2.32608e-32	1.26796e-31			AT5G57010	AT5G57010	-3.59769	1.56276e-217	4.60734e-216
AT2G33070	NSP2	5.94072	1.91872e-130	3.42085e-129			AT5G26582	AT5G26582	-3.57827	3.56925e-08	8.9179e-08
AT1G02770	AT1G02770	5.9347	0	0			AT5G12340	AT5G12340	-3.57341	1.72161e-97	2.30087e-96
AT3G53040	AT3G53040	5.92717	7.53032e-196	1.98484e-194			AT1G33760	ERF022	-3.56558	3.32171e-140	6.40831e-139
AT5G22810	AT5G22810	5.92146	5.92318e-183	1.47906e-181			AT4G27657	AT4G27657	-3.56335	3.89656e-242	1.31528e-240
AT2G21450	CHR34	5.90969	1.75899e-64	1.63934e-63			AT2G28210	ATACA2	-3.55577	3.37834e-27	1.63709e-26
AT1G12064	AT1G12064	5.89544	4.7854e-50	3.58695e-49			AT1G66160	PUB20	-3.55517	0	0
AT5G40560	DegP13	5.89038	2.44517e-32	1.33146e-31			AT5G17680	AT5G17680	-3.54226	1.39966e-44	9.57269e-44
AT3G30833	AT3G30833	5.87374	1.27697e-32	7.01157e-32			AT3G61190	BAP1	-3.53181	0	0
AT5G54560	AT5G54560	5.86426	5.48489e-30	2.83713e-29			AT4G08110	AT4G08110	-3.53038	1.38321e-268	5.36937e-267
AT4G22100	BGLU3	5.8618	6.6502e-32	3.58615e-31			AT5G22250	CAF1-11	-3.52793	0	0
AT5G66780	AT5G66780	5.85289	1.57247e-164	3.56835e-163			AT2G06950	AT2G06950	-3.52138	0	0
AT3G48270	CYP71A26	5.82747	9.11145e-36	5.31138e-35			AT3G26818	MIR169M	-3.51946	3.26366e-12	9.9164e-12
AT4G18680	AT4G18680	5.77526	1.00052e-32	5.50779e-32			AT4G17615	CBL1	-3.51626	0	0
AT3G56970	ORG2	5.76457	3.5191e-45	2.43214e-44			AT5G15360	AT5G15360	-3.50944	1.47876e-14	4.90748e-14
AT2G21490	LEA	5.75595	0	0			AT2G42760	AT2G42760	-3.50439	4.61263e-211	1.31599e-209
AT5G53230	AT5G53230	5.75212	2.83583e-39	1.77682e-38			AT5G47220	ERF2	-3.49988	0	0
AT5G52300	LTI65	5.72892	0	0			AT3G19580	AZF2	-3.49706	0	0
AT1G48530	AT1G48530	5.72121	1.43565e-60	1.25834e-59			AT3G16030	CES101	-3.49547	7.88446e-184	1.98428e-182
AT5G57380	VIN3	5.71872	1.98064e-51	1.52019e-50			AT5G15290	CASP5	-3.48262	1.21895e-42	8.08428e-42
AT5G09640	SCPL19	5.71026	3.19551e-46	2.24421e-45			AT1G52650	AT1G52650	-3.4812	4.98066e-09	1.30023e-08
AT5G43000	AT5G43000	5.69863	4.80929e-29	2.43074e-28			AT2G42510	AT2G42510	-3.47275	1.42534e-07	3.42306e-07
AT4G33720	AT4G33720	5.69356	5.72812e-56	4.73249e-55			AT1G27730	ZAT10	-3.46768	0	0
AT1G62290	APA2	5.6882	0	0			AT5G14470	GLCAK2	-3.46199	1.40025e-148	2.86308e-147
AT1G21290	AT1G21290	5.59998	1.03721e-30	5.44314e-30			AT4G31230	AT4G31230	-3.46136	2.376e-11	6.95613e-11
AT5G65080	MAF5	5.58822	0	0			AT2G40008	AT2G40008	-3.45756	3.82749e-16	1.34587e-15
AT2G40170	EM6	5.58416	4.51373e-71	4.52787e-70			AT5G64310	AGP1	-3.44876	2.30565e-272	9.11587e-271
AT4G16160	OEP162	5.57882	1.49924e-27	7.30999e-27			AT2G12190	AT2G12190	-3.44444	6.90674e-21	2.81474e-20
AT5G60470	IDD13	5.56392	5.02045e-35	2.89172e-34			AT4G25810	XTH23	-3.43587	0	0
AT1G11370	PME56	5.54813	3.48626e-46	2.44707e-45			AT4G24570	PUMP4	-3.42677	0	0
AT3G25160	AT3G25160	5.54531	4.48742e-31	2.37635e-30			AT5G45340	CYP707A3	-3.42636	0	0
AT5G50770	HSD6	5.52695	1.53737e-115	2.42087e-114			AT2G44840	ERF13	-3.42184	6.04569e-241	2.03536e-239
AT1G65300	PHE2	5.49888	1.61042e-20	6.48929e-20			AT3G56890	AT3G56890	-3.41947	2.60046e-09	6.88547e-09
AT1G13608	AT1G13608	5.47101	9.66074e-21	3.91875e-20			AT5G44990	AT5G44990	-3.41671	2.10153e-08	5.32185e-08
AT3G03341	AT3G03341	5.46844	1.29174e-125	2.22558e-124			AT3G04640	AT3G04640	-3.41098	6.67539e-124	1.13336e-122
AT1G25410	IPT6	5.45601	9.93547e-31	5.21612e-30			AT5G64870	FLOT3	-3.40827	2.37819e-105	3.42684e-104
AT1G68510	LBD42	5.42934	1.02721e-43	6.9201e-43			AT3G19680	AT3G19680	-3.39714	0	0
AT4G28090	sks10	5.41983	8.90858e-29	4.47876e-28			AT4G30430	TET9	-3.39138	2.84092e-30	1.47876e-29
AT2G38920	RF178	5.39568	3.26312e-31	1.73267e-30			AT2G15030	AT2G15030	-3.38571	1.14261e-24	5.18212e-24
AT2G39330	JAL23	5.36028	5.16124e-73	5.28924e-72			AT5G01100	AT5G01100	-3.35363	0	0
AT5G08460	AT5G08460	5.35706	2.44024e-26	1.15412e-25			AT2G01180	LPP1	-3.35315	0	0
AT5G41830	AT5G41830	5.35461	1.37561e-29	7.03734e-29			AT5G19100	AT5G19100	-3.33616	2.28517e-56	1.89653e-55
AT5G38180	AT5G38180	5.34186	8.44085e-27	4.04139e-26			AT5G41080	GDPD2	-3.33326	0	0
AT1G47400	AT1G47400	5.33127	9.62129e-183	2.39784e-181			AT3G19240	AT3G19240	-3.3253	0	0
AT4G16460	AT4G16460	5.32863	4.7743e-31	2.52618e-30			AT1G16130	WAKL2	-3.32221	3.79772e-207	1.05529e-205
AT1G47395	AT1G47395	5.31667	2.67412e-52	2.08114e-51			AT3G29280	AT3G29280	-3.30948	1.13226e-38	6.99339e-38
AT5G22460	AT5G22460	5.31575	3.9367e-99	5.35057e-98			AT2G22590	UGT91A1	-3.29967	1.41542e-08	3.61474e-08
AT1G47405	AT1G47405	5.29567	5.43739e-20	2.1561e-19			AT1G24330	PUB6	-3.28323	7.67671e-275	3.06829e-273
AT5G60250	AT5G60250	5.28966	0	0			AT3G10600	CAT7	-3.2822	1.25589e-09	3.3848e-09
AT3G28610	AT3G28610	5.28852	3.50119e-27	1.69512e-26			AT4G25490	DREB1B	-3.2802	3.43185e-76	3.62872e-75
AT1G03790	SOM	5.28696	7.7162e-67	7.39577e-66			AT1G61340	AT1G61340	-3.27911	3.9229e-143	7.73708e-142
AT4G01980	AT4G01980	5.27874	2.7427e-43	1.83659e-42			AT1G02400	GA2OX6	-3.25736	0	0
AT5G04150	BHLH101	5.27302	8.21492e-76	8.64693e-75			AT1G24260	2024-09-03	-3.25506	1.62206e-90	2.01148e-89
AT1G12070	AT1G12070	5.26928	2.09712e-136	3.94191e-135			AT4G29610	CDA6	-3.23074	2.10904e-62	1.89991e-61
AT4G39480	CYP96A9	5.26036	4.53037e-45	3.12347e-44			AT1G10340	AT1G10340	-3.22908	8.73479e-221	2.62967e-219
AT3G55240	AT3G55240	5.25596	1.55592e-92	1.97633e-91			AT1G72240	AT1G72240	-3.22897	3.57701e-59	3.07012e-58
AT1G43800	S-ACP-DES6	5.2424	4.12924e-291	1.77205e-289			AT3G10930	AT3G10930	-3.22467	0	0
AT5G24860	FPF1	5.22883	2.4385e-31	1.29857e-30			AT3G53600	AT3G53600	-3.22429	2.52272e-15	8.60957e-15
AT1G73120	AT1G73120	5.22819	0	0			AT3G27540	AT3G27540	-3.22337	1.03444e-249	3.63047e-248
AT1G67220	HAC2	5.22007	8.48481e-46	5.9119e-45			AT3G52450	PUB22	-3.21038	0	0
AT4G37990	CAD8	5.20281	4.37772e-44	2.96398e-43			AT5G65300	AT5G65300	-3.20618	5.4054e-233	1.73542e-231
AT3G27660	OL2	5.18329	0	0			AT2G34930	AT2G34930	-3.2054	0	0
AT2G31985	AT2G31985	5.17076	2.04966e-97	2.73502e-96			AT2G22880	AT2G22880	-3.20498	3.37281e-253	1.21364e-251
AT5G25180	CYP71B14	5.15181	3.88231e-27	1.87705e-26			AT1G20823	ATL80	-3.19742	4.80749e-277	1.93965e-275
AT5G06760	LEA4-5	5.13934	2.39218e-122	4.00049e-121			AT3G48100	ARR5	-3.19589	0	0
AT1G72570	AIL1	5.13305	5.64657e-27	2.71621e-26			AT1G78720	AT1G78720	-3.18681	3.81739e-15	1.29556e-14
AT2G24255	AT2G24255	5.12314	1.05671e-29	5.42325e-29			AT3G10300	CML49	-3.18568	0	0
AT4G05110	ENT6	5.12307	1.12269e-95	1.47353e-94			AT1G16550	AT1G16550	-3.17727	2.19338e-74	2.276e-73
AT1G80130	AT1G80130	5.12088	2.05899e-74	2.13741e-73			AT5G23580	CPK12	-3.17111	1.08324e-30	5.68004e-30
AT1G22100	AT1G22100	5.11915	4.22139e-26	1.98335e-25			AT1G53620	AT1G53620	-3.16787	2.06645e-08	5.23715e-08
AT4G05370	AT4G05370	5.10381	3.30148e-23	1.44169e-22			AT1G22810	ERF019	-3.15836	3.94175e-126	6.81888e-125
AT3G29970	AT3G29970	5.09234	2.81525e-32	1.53038e-31			AT5G45630	AT5G45630	-3.15754	5.8587e-70	5.82008e-69
AT1G17010	AT1G17010	5.05987	2.14775e-25	9.91446e-25			AT1G20510	4CLL5	-3.15105	0	0
AT3G14880	AT3G14880	5.05449	5.6058e-25	2.56328e-24			AT3G54020	IPCS1	-3.13945	0	0
AT1G69880	TRX8	5.03451	4.34745e-255	1.56655e-253			AT1G53885	AT1G53885	-3.13186	1.39188e-256	5.06535e-255
AT1G65340	CYP96A3	5.02907	1.31872e-21	5.49895e-21			AT4G31800	WRKY18	-3.12606	0	0
AT3G07920	AT3G07920	5.01745	2.35857e-25	1.08779e-24			AT2G35980	YLS9	-3.12354	2.96604e-52	2.30692e-51
AT5G38170	AT5G38170	5.00922	3.56675e-25	1.63852e-24			AT1G43590	AT1G43590	-3.1209	2.14624e-69	2.11895e-68
AT2G35300	LEA18	5.00184	0	0			AT2G13680	CALS5	-3.1195	3.33046e-08	8.33509e-08
AT5G19470	NUDT24	4.99904	9.31772e-22	3.90832e-21			AT4G04695	CPK31	-3.11673	4.17425e-86	4.95801e-85
AT5G57200	AT5G57200	4.99401	8.15999e-29	4.10644e-28			AT4G33920	AT4G33920	-3.11424	0	0
AT5G66430	AT5G66430	4.99338	1.99893e-31	1.06782e-30			AT5G32460	AT5G32460	-3.10243	2.00367e-10	5.60843e-10
AT5G59170	AT5G59170	4.97985	1.88441e-140	3.64367e-139			AT5G03204	AT5G03204	-3.10034	3.59157e-06	7.86058e-06
AT3G27250	AT3G27250	4.97398	2.42851e-48	1.77008e-47			AT1G69720	HO3	-3.09768	1.15428e-19	4.52666e-19
AT4G15370	BARS1	4.95932	1.72926e-88	2.0997e-87			AT1G53903	AT1G53903	-3.09635	2.54956e-251	9.02208e-250
AT2G31980	CYS2	4.95067	0	0			AT5G41750	AT5G41750	-3.09609	0	0
AT5G53390	AT5G53390	4.94467	7.57983e-18	2.82138e-17			AT3G28340	GATL10	-3.09435	0	0
AT1G22015	B3GALT5	4.93143	1.08227e-21	4.52993e-21			AT5G24590	ANAC091	-3.07398	0	0
AT3G15605	AT3G15605	4.90674	1.39817e-28	7.00452e-28			AT4G13320	AT4G13320	-3.07007	3.27639e-39	2.05034e-38
AT1G35750	APUM10	4.90189	1.22982e-19	4.81995e-19			AT1G61310	AT1G61310	-3.06815	1.50114e-148	3.06693e-147
AT1G68320	MYB62	4.89892	1.05931e-100	1.4599e-99			AT3G47580	AT3G47580	-3.06518	4.77131e-87	5.7122e-86
AT2G22180	AT2G22180	4.89397	1.519e-25	7.04251e-25			AT3G20520	GDPDL5	-3.06061	1.53831e-14	5.10247e-14
AT5G55750	AT5G55750	4.8762	1.07739e-27	5.27474e-27			AT1G70130	LECRK52	-3.04853	6.13006e-17	2.21014e-16
AT3G28415	ABCB22	4.87206	8.60581e-25	3.91479e-24			AT3G45700	NPF2.4	-3.04696	2.20521e-101	3.05392e-100
AT5G56080	NAS2	4.85996	1.07014e-104	1.52741e-103			AT1G51330	AT1G51330	-3.04474	2.47571e-06	5.48161e-06
AT4G19430	AT4G19430	4.85744	1.15963e-21	4.84741e-21			AT5G54090	AT5G54090	-3.03841	1.1587e-144	2.30838e-143
AT4G04293	AT4G04293	4.84412	3.07388e-17	1.12072e-16			AT4G37710	VQ29	-3.03826	1.26274e-07	3.04312e-07
AT4G14080	A6	4.83795	7.48772e-26	3.49618e-25			AT3G45760	AT3G45760	-3.03669	5.83663e-06	1.26062e-05
AT5G53270	AT5G53270	4.82894	9.21291e-19	3.52291e-18			AT1G76600	AT1G76600	-3.03484	0	0
AT1G64240	AT1G64240	4.82051	3.0099e-38	1.84482e-37			AT1G14480	AT1G14480	-3.03157	3.4645e-167	7.95345e-166
AT5G55800	AT5G55800	4.81651	5.97727e-22	2.52244e-21			AT4G08090	AT4G08090	-3.02912	1.26453e-06	2.85891e-06
AT3G12460	AT3G12460	4.81381	1.38188e-134	2.55071e-133			AT1G80820	CCR2	-3.0282	3.91968e-170	9.14591e-169
AT5G09910	AT5G09910	4.80637	6.51348e-25	2.97514e-24			AT1G70170	MMP	-3.02534	5.17451e-87	6.192e-86
AT3G08860	PYD4	4.80251	4.07998e-302	1.82743e-300			AT1G48400	AT1G48400	-3.02466	4.7832e-06	1.03905e-05
AT5G27200	ACP5	4.80172	1.00846e-89	1.23739e-88			AT4G34400	AT4G34400	-3.02261	2.28863e-15	7.82483e-15
AT5G55270	AT5G55270	4.80112	1.79786e-27	8.7469e-27			AT2G22750	BHLH18	-3.02259	4.2338e-07	9.87168e-07
AT5G27845	AT5G27845	4.79282	5.92294e-21	2.4198e-20			AT1G66040	ORTH4	-3.02102	3.96294e-38	2.42606e-37
AT2G21820	AT2G21820	4.78139	1.92822e-82	2.1801e-81			AT5G36870	CALS4	-3.0208	1.191e-49	8.87275e-49
AT4G01970	RFS4	4.77206	1.05002e-85	1.23856e-84			AT2G36650	AT2G36650	-3.01652	1.8618e-147	3.78266e-146
AT1G29680	AT1G29680	4.76715	2.58866e-52	2.01523e-51			AT1G11925	AT1G11925	-3.0132	8.3868e-16	2.91073e-15
AT5G05250	AT5G05250	4.76019	0	0			AT1G32920	AT1G32920	-3.01266	0	0
AT2G20825	ULT2	4.75841	2.37539e-25	1.09515e-24			AT1G45140	AT1G45140	-3.00875	3.5297e-06	7.72782e-06
AT4G11710	AT4G11710	4.74358	1.10169e-23	4.87485e-23			AT2G22500	PUMP5	-3.00873	0	0
AT4G15210	BAM5	4.74249	4.76704e-111	7.24816e-110			AT4G33120	AT4G33120	-3.00834	2.24399e-59	1.93053e-58
AT3G03660	WOX11	4.73713	1.47156e-55	1.20876e-54			AT3G18320	AT3G18320	-3.00098	7.57123e-79	8.27538e-78
AT5G07330	AT5G07330	4.73435	4.04263e-181	1.00167e-179			AT4G17490	ERF6	-2.9974	0	0
AT1G51020	AT1G51020	4.72891	1.38805e-18	5.2731e-18			AT1G06135	AT1G06135	-2.98741	5.65223e-12	1.70045e-11
AT5G10120	EIL4	4.72441	1.42993e-21	5.954e-21			AT1G22470	AT1G22470	-2.98469	8.47102e-74	8.74758e-73
AT3G44460	DPBF2	4.72438	2.797e-14	9.1847e-14			AT2G18690	AT2G18690	-2.98428	0	0
AT5G51760	AHG1	4.70684	1.57999e-24	7.14427e-24			AT4G31520	AT4G31520	-2.98134	1.98692e-14	6.56497e-14
AT1G71470	AT1G71470	4.70032	8.45817e-23	3.64812e-22			AT5G33355	AT5G33355	-2.97539	9.83718e-09	2.53219e-08
AT2G14247	AT2G14247	4.69808	1.52807e-207	4.26463e-206			AT3G24310	MYB305	-2.97426	8.82685e-30	4.54104e-29
AT2G20470	AT2G20470	4.69112	7.29577e-62	6.52646e-61			AT3G56790	AT3G56790	-2.97136	9.0979e-25	4.13644e-24
AT4G11310	AT4G11310	4.68545	1.89062e-16	6.71533e-16			AT5G51790	BHLH120	-2.96974	9.98626e-35	5.7288e-34
AT5G65165	SDH2-3	4.67703	3.59025e-123	6.0435e-122			AT4G13495	AT4G13495	-2.96801	0	0
AT3G49300	AT3G49300	4.6687	4.33995e-20	1.72708e-19			AT3G25780	AOC3	-2.96398	0	0
AT4G14819	AT4G14819	4.66486	1.01772e-21	4.26325e-21			AT3G54810	GATA8	-2.96248	0	0
AT3G21880	COL12	4.66462	1.98283e-19	7.72624e-19			AT2G44500	AT2G44500	-2.96101	0	0
AT5G18450	DREB2G	4.66379	1.9295e-26	9.14932e-26			AT2G27500	AT2G27500	-2.95975	0	0
AT2G47050	AT2G47050	4.64893	1.44183e-33	8.07601e-33			AT3G43540	AT3G43540	-2.9588	0	0
AT2G41225	AT2G41225	4.63758	2.73285e-19	1.06149e-18			AT3G15210	ERF4	-2.95305	0	0
AT5G07200	GA20OX3	4.62412	7.13793e-83	8.14946e-82			AT3G62720	XXT1	-2.95195	0	0
AT2G30770	CYP71A13	4.62143	1.35475e-86	1.61586e-85			AT4G20920	AT4G20920	-2.94947	2.21212e-07	5.24618e-07
AT2G25150	SCT	4.6186	2.27477e-80	2.52183e-79			AT4G28085	AT4G28085	-2.94942	2.43753e-119	3.95751e-118
AT2G26020	PDF1.2B	4.57775	1.18922e-51	9.15222e-51			AT1G14880	PCR1	-2.94926	6.72032e-68	6.5119e-67
AT3G17010	AT3G17010	4.5725	2.23272e-16	7.91288e-16			AT3G57450	AT3G57450	-2.94223	5.50248e-305	2.49511e-303
AT2G24800	PER18	4.55858	2.26444e-57	1.90275e-56			AT5G05410	DREB2A	-2.94198	0	0
AT1G80090	PV42B	4.54543	3.62161e-17	1.31742e-16			AT4G32630	AT4G32630	-2.93619	5.72125e-08	1.41103e-07
AT5G47670	NFYB6	4.54517	3.08237e-43	2.06296e-42			AT4G27280	AT4G27280	-2.93439	0	0
AT5G25470	AT5G25470	4.5443	2.68243e-101	3.71078e-100			AT1G07160	AT1G07160	-2.92809	7.61743e-29	3.83491e-28
AT3G25280	NPF4.2	4.5393	5.7259e-19	2.20399e-18			AT1G20350	TIM17-1	-2.92431	3.06972e-41	1.99205e-40
AT5G09210	AT5G09210	4.53481	1.10423e-21	4.61959e-21			AT2G35658	AT2G35658	-2.91814	2.41068e-55	1.97196e-54
AT3G26940	CDG1	4.52699	4.06888e-20	1.62122e-19			AT1G33817	AT1G33817	-2.91612	6.72623e-06	1.44654e-05
AT3G14040	AT3G14040	4.52347	8.18562e-18	3.04421e-17			AT1G09240	NAS3	-2.9152	3.31561e-92	4.19486e-91
AT3G49770	AT3G49770	4.52248	1.29554e-18	4.93045e-18			AT2G04450	NUDT6	-2.91408	1.07783e-07	2.60878e-07
AT2G20430	RIC6	4.51399	6.72995e-18	2.50831e-17			AT4G01950	GPAT3	-2.91085	0	0
AT5G45830	DOG1	4.51128	2.79972e-135	5.21285e-134			AT3G44190	AT3G44190	-2.9092	0	0
AT4G04930	DES-1-LIKE	4.50117	9.59247e-15	3.20333e-14			AT5G46890	AT5G46890	-2.90027	4.92446e-123	8.27308e-122
AT5G15500	AT5G15500	4.48705	1.16122e-165	2.6492e-164			AT4G18010	IP5P2	-2.89412	0	0
AT1G52695	AT1G52695	4.46741	1.25921e-16	4.49318e-16			AT1G33720	CYP76C6	-2.89372	5.21031e-57	4.36236e-56
AT5G53820	AT5G53820	4.46153	1.28561e-58	1.09755e-57			AT3G54000	AT3G54000	-2.89356	0	0
AT3G22500	ATECP31	4.45947	8.8392e-21	3.59119e-20			AT4G15150	AT4G15150	-2.89016	1.36825e-34	7.82468e-34
AT2G38900	AT2G38900	4.45259	3.89687e-18	1.46218e-17			AT4G01540	NAC68	-2.88589	1.1645e-224	3.59452e-223
AT2G38530	LTP2	4.44501	0	0			AT3G47960	NPF2.10	-2.88582	0	0
AT5G09550	AT5G09550	4.43309	1.28343e-18	4.88509e-18			AT4G36000	AT4G36000	-2.88502	6.05015e-31	3.19137e-30
AT5G05340	PER52	4.4281	4.32398e-31	2.29027e-30			AT2G35710	PGSIP8	-2.88455	6.5412e-271	2.55856e-269
AT2G27940	ATL57	4.42697	2.86701e-16	1.013e-15			AT5G66080	AT5G66080	-2.87448	5.35657e-152	1.11483e-150
AT1G63070	AT1G63070	4.41979	2.88163e-69	2.83515e-68			AT3G51970	ASAT1	-2.86955	4.52257e-64	4.186e-63
AT1G28650	AT1G28650	4.4127	1.61175e-19	6.29753e-19			AT3G25240	AT3G25240	-2.86905	3.13612e-15	1.06689e-14
AT1G62410	AT1G62410	4.40103	1.91571e-17	7.04066e-17			AT3G52800	SAP6	-2.8613	0	0
AT4G36110	AT4G36110	4.40063	1.11178e-55	9.15288e-55			AT2G40000	HSPRO2	-2.8598	0	0
AT2G25340	VAMP712	4.39466	3.7531e-18	1.40906e-17			AT5G51530	AT5G51530	-2.8589	1.52186e-11	4.49348e-11
AT2G26450	PME13	4.38097	9.78081e-84	1.1247e-82			AT2G31083	CLE5	-2.85638	3.6822e-24	1.64783e-23
AT3G21860	ASK10	4.37768	4.68243e-20	1.86135e-19			AT4G13494	MIR863A	-2.85544	4.86224e-23	2.11423e-22
AT4G33070	PDC1	4.37428	0	0			AT3G57770	AT3G57770	-2.85387	2.55264e-193	6.66652e-192
AT4G31615	REM2	4.37323	1.92363e-135	3.58685e-134			AT3G06950	AT3G06950	-2.8527	3.34308e-214	9.73291e-213
AT1G56100	AT1G56100	4.36708	9.44751e-16	3.27354e-15			AT1G68650	AT1G68650	-2.85178	1.21201e-71	1.2254e-70
AT5G03795	AT5G03795	4.36211	2.6003e-249	9.08864e-248			AT5G23700	AT5G23700	-2.84728	6.78274e-41	4.38601e-40
AT1G14950	AT1G14950	4.35093	1.65842e-19	6.47791e-19			AT2G36540	AT2G36540	-2.84053	5.80214e-10	1.58747e-09
AT1G64405	AT1G64405	4.34914	5.37751e-121	8.88277e-120			AT1G70090	GATL9	-2.82595	0	0
AT1G14250	APY5	4.34912	0	0			AT5G53190	SWEET3	-2.82379	7.26681e-12	2.17698e-11
AT1G48670	AT1G48670	4.34572	3.00184e-18	1.12983e-17			AT4G13300	TPS13	-2.81564	1.36537e-35	7.93393e-35
AT2G37870	AT2G37870	4.33791	2.95872e-105	4.25856e-104			AT4G08109	AT4G08109	-2.81214	6.39584e-08	1.57272e-07
AT2G23240	AT2G23240	4.33291	2.8155e-19	1.09276e-18			AT3G43690	AT3G43690	-2.80313	8.19268e-146	1.64625e-144
AT2G30766	AT2G30766	4.32579	7.71947e-191	1.99569e-189			AT5G44350	AT5G44350	-2.80215	1.23749e-118	2.00154e-117
AT4G33145	AT4G33145	4.32569	2.92197e-57	2.45284e-56			AT4G10310	HKT1	-2.80053	9.90223e-90	1.2156e-88
AT1G21970	NFYB9	4.32291	4.22203e-17	1.53278e-16			AT5G35110	AT5G35110	-2.79868	1.62968e-60	1.42597e-59
AT2G42540	COR15A	4.32193	0	0			AT1G24130	AT1G24130	-2.79654	4.66081e-20	1.85304e-19
AT2G34315	AT2G34315	4.31387	3.48448e-16	1.22694e-15			AT5G45110	NPR3	-2.79386	0	0
AT2G22710	AT2G22710	4.3133	1.3644e-23	6.01964e-23			AT5G08600	AT5G08600	-2.79154	8.99666e-66	8.52105e-65
AT2G19900	NADP-ME1	4.31188	1.75076e-222	5.33348e-221			AT1G19371	MIR169H	-2.78981	3.34789e-05	6.82579e-05
AT3G21040	AT3G21040	4.30957	4.13981e-62	3.71105e-61			AT2G22850	AtbZIP6	-2.78686	4.23142e-61	3.73695e-60
AT5G44430	PDF1.2C	4.30671	8.05041e-25	3.66539e-24			AT4G16680	AT4G16680	-2.78212	0	0
AT4G39500	CYP96A11	4.29913	5.64524e-17	2.03878e-16			AT5G48100	TT10	-2.78176	1.45594e-14	4.83364e-14
AT2G15318	AT2G15318	4.29774	4.30151e-20	1.71258e-19			AT5G59732	AT5G59732	-2.78128	2.77667e-05	5.70475e-05
AT5G57123	AT5G57123	4.28466	3.8747e-158	8.42698e-157			AT1G16370	2024-10-06	-2.78099	3.06478e-139	5.86405e-138
AT1G26410	AT1G26410	4.28326	3.19129e-25	1.46788e-24			AT1G32910	AT1G32910	-2.77906	4.1945e-20	1.6705e-19
AT4G23200	CRK12	4.27965	4.20746e-102	5.87439e-101			AT3G15500	NAC055	-2.777	1.38647e-142	2.72403e-141
AT4G18920	AT4G18920	4.27743	9.01052e-12	2.68805e-11			AT5G41740	AT5G41740	-2.77501	0	0
AT1G68170	AT1G68170	4.27415	2.04832e-81	2.29162e-80			AT5G10250	DOT3	-2.77268	2.57074e-05	5.29611e-05
AT3G58740	CSY1	4.26819	2.3776e-17	8.71196e-17			AT2G21510	AT2G21510	-2.77219	9.42724e-68	9.11763e-67
AT1G14940	AT1G14940	4.26651	1.84448e-17	6.78471e-17			AT1G78280	AT1G78280	-2.76913	0	0
AT3G21800	UGT71B8	4.26166	1.37591e-28	6.89568e-28			AT3G55710	UGT76F2	-2.76802	4.3746e-84	5.07596e-83
AT1G71691	AT1G71691	4.26163	6.92706e-19	2.65835e-18			AT1G20310	AT1G20310	-2.76795	9.48933e-55	7.68869e-54
AT3G16300	AT3G16300	4.26014	2.52654e-126	4.37661e-125			AT5G38710	POX2	-2.7673	1.24234e-153	2.61106e-152
AT5G34480	AT5G34480	4.25641	1.28194e-13	4.1044e-13			AT2G04800	AT2G04800	-2.76699	6.09856e-102	8.51009e-101
AT4G09595	AT4G09595	4.25415	1.20535e-15	4.1658e-15			AT1G70110	LECRK51	-2.76661	2.89897e-05	5.94507e-05
AT3G16680	AT3G16680	4.25121	1.72814e-14	5.72175e-14			AT3G50060	MYB77	-2.76613	0	0
AT4G28365	ENODL3	4.24628	2.19129e-28	1.09138e-27			AT2G46400	WRKY46	-2.76364	2.35162e-261	8.8341e-260
AT3G60100	CSY5	4.24414	2.99142e-13	9.45476e-13			AT1G11960	AT1G11960	-2.75002	0	0
AT2G19770	PRO4	4.24238	8.66161e-19	3.31457e-18			AT3G05975	AT3G05975	-2.74667	4.18933e-05	8.4746e-05
AT4G33280	REM16	4.23211	4.39549e-106	6.38754e-105			AT2G39240	AT2G39240	-2.74629	2.97715e-07	7.00409e-07
AT5G42530	AT5G42530	4.22869	0	0			AT3G44326	AT3G44326	-2.74374	4.01493e-52	3.1161e-51
AT1G55650	HMGB11	4.22345	2.09538e-19	8.15491e-19			AT4G15660	GRXS8	-2.7398	8.08625e-92	1.01954e-90
AT3G12410	AT3G12410	4.21449	2.98599e-23	1.30504e-22			AT3G29000	CML30	-2.7396	7.72867e-185	1.96048e-183
AT3G49580	LSU1	4.21434	7.72853e-82	8.68442e-81			AT4G30280	XTH18	-2.73821	0	0
AT5G48710	SUMO4	4.21092	4.03026e-14	1.31284e-13			AT3G32925	AT3G32925	-2.73749	1.01239e-07	2.45689e-07
AT1G73040	JAL19	4.20664	4.53632e-91	5.66653e-90			AT1G73300	SCPL2	-2.72996	7.86508e-50	5.87645e-49
AT2G18010	AT2G18010	4.20498	1.7643e-15	6.05999e-15			AT5G13205	AT5G13205	-2.72988	1.15391e-54	9.33181e-54
AT1G25310	MEE8	4.19405	4.84975e-15	1.63876e-14			AT3G46500	AT3G46500	-2.7281	1.35622e-25	6.29693e-25
AT5G01120	AT5G01120	4.18973	2.72666e-43	1.82633e-42			AT4G01250	WRKY22	-2.72772	1.68564e-200	4.53636e-199
AT3G25810	TPS24	4.1845	1.54894e-12	4.76512e-12			AT5G34930	TYRAAT1	-2.72627	1.6045e-126	2.78882e-125
AT4G12210	AT4G12210	4.17716	2.3883e-16	8.45724e-16			AT4G13570	HTA4	-2.72584	7.17572e-06	1.53984e-05
AT5G41765	AT5G41765	4.17351	1.54269e-30	8.07099e-30			AT5G16360	AT5G16360	-2.72223	0	0
AT1G62225	AT1G62225	4.16568	2.56954e-14	8.44862e-14			AT1G18290	AT1G18290	-2.72118	2.25849e-22	9.65823e-22
AT2G21260	AT2G21260	4.16107	9.17417e-157	1.97018e-155			AT2G33580	LYK5	-2.7098	0	0
AT1G60090	BGLU4	4.14939	8.27949e-17	2.97421e-16			AT5G01040	LAC8	-2.70762	0	0
AT3G11740	AT3G11740	4.13772	1.62106e-20	6.53116e-20			AT5G26030	HEM15	-2.69959	0	0
AT1G19460	AT1G19460	4.13677	1.14515e-15	3.95935e-15			AT1G09070	SRC2	-2.69895	0	0
AT5G06500	AGL96	4.13359	1.51039e-12	4.64708e-12			AT3G45430	LECRK15	-2.69645	1.4728e-17	5.43391e-17
AT1G30920	AT1G30920	4.12798	3.56719e-23	1.55639e-22			AT4G03940	AT4G03940	-2.69164	2.33846e-17	8.57102e-17
AT3G54450	NPF5.4	4.12058	4.12889e-17	1.4996e-16			AT1G07135	AT1G07135	-2.69116	6.47239e-54	5.1771e-53
AT3G10510	AT3G10510	4.11932	3.11974e-18	1.17231e-17			AT2G41010	CAMBP25	-2.69038	0	0
AT2G35570	AT2G35570	4.11636	4.30251e-23	1.87339e-22			AT1G23760	JP630	-2.68982	1.69095e-40	1.08522e-39
AT2G05330	AT2G05330	4.1061	5.3704e-77	5.75448e-76			AT3G57530	CPK32	-2.68761	0	0
AT4G01975	AT4G01975	4.10154	7.95742e-25	3.62563e-24			AT4G13330	AT4G13330	-2.68457	5.30916e-116	8.41711e-115
AT3G13130	AT3G13130	4.09997	1.55604e-13	4.96833e-13			AT4G23180	CRK10	-2.68391	0	0
AT3G28857	PRE5	4.09937	3.58003e-27	1.73221e-26			AT5G66070	ATL27	-2.6836	5.84517e-290	2.50005e-288
AT1G48130	PER1	4.09608	1.88011e-10	5.26833e-10			AT5G59260	LECRK21	-2.68	3.47014e-08	8.67535e-08
AT1G14930	AT1G14930	4.09394	1.53589e-28	7.68544e-28			AT5G64660	PUB27	-2.67763	0	0
AT5G55150	AT5G55150	4.08916	6.28058e-15	2.1111e-14			AT5G66650	AT5G66650	-2.67548	0	0
AT2G37670	AT2G37670	4.08863	0	0			AT5G47450	TIP2-3	-2.67448	0	0
AT3G07620	AT3G07620	4.07404	3.02883e-14	9.92816e-14			AT2G31880	SOBIR1	-2.67118	0	0
AT3G47710	PRE4	4.04506	1.1022e-23	4.87626e-23			AT1G13550	AT1G13550	-2.66771	3.498e-07	8.19633e-07
AT4G14780	AT4G14780	4.04394	9.98309e-148	2.03151e-146			AT3G32920	AT3G32920	-2.66769	1.06561e-05	2.25702e-05
AT1G01580	FRO2	4.04327	7.9777e-35	4.58476e-34			AT1G59910	FH7	-2.66528	0	0
AT3G25905	CLE27	4.03727	1.51467e-35	8.79751e-35			AT1G51820	AT1G51820	-2.66327	2.27789e-34	1.29746e-33
AT3G27415	AT3G27415	4.0372	5.80524e-15	1.95672e-14			AT2G24440	AT2G24440	-2.66322	1.72277e-16	6.12424e-16
AT5G45880	AT5G45880	4.03442	1.09605e-10	3.10491e-10			AT1G22570	NPF5.15	-2.6602	0	0
AT3G62610	ATMYB11	4.03329	2.67801e-13	8.47986e-13			AT1G35625	AT1G35625	-2.65466	9.01869e-06	1.92037e-05
AT2G47520	ERF071	4.02755	2.11593e-60	1.84828e-59			AT5G66660	AT5G66660	-2.64998	6.52653e-05	0.000129973
AT2G23220	CYP81D6	4.01745	6.02728e-13	1.8827e-12			AT5G25230	AT5G25230	-2.63944	6.60536e-14	2.13754e-13
AT1G06350	AT1G06350	4.0106	4.41188e-209	1.24622e-207			AT5G10380	ATL55	-2.63701	1.15194e-163	2.59338e-162
AT2G23230	TPS05	4.00708	4.84449e-11	1.39676e-10			AT1G19020	AT1G19020	-2.63557	0	0
AT4G27550	TPS4	4.00298	6.5795e-32	3.54952e-31			AT2G26530	AR781	-2.63525	0	0
AT5G66830	AT5G66830	4.00108	1.81009e-121	3.00159e-120			AT4G39320	AT4G39320	-2.6342	1.21026e-80	1.34521e-79
AT2G28420	AT2G28420	4.00013	7.86638e-105	1.1259e-103			AT4G18422	AT4G18422	-2.63417	3.69946e-13	1.16566e-12
AT4G12960	GILT	3.99824	2.33357e-09	6.1948e-09			AT1G70700	TIFY7	-2.61757	0	0
AT3G12960	AT3G12960	3.99032	1.74599e-22	7.48656e-22			AT3G19040	TAF1B	-2.61723	1.98882e-62	1.79225e-61
AT2G18340	AT2G18340	3.98443	2.88819e-16	1.0202e-15			AT1G19770	PUP14	-2.61423	0	0
AT4G17710	HDG4	3.98302	5.91576e-21	2.41725e-20			AT5G10750	AT5G10750	-2.60519	0	0
AT1G18100	MFT	3.97947	2.07656e-271	8.17228e-270			AT5G56910	AT5G56910	-2.60328	4.75558e-231	1.51164e-229
AT5G09570	AT5G09570	3.97699	2.10425e-33	1.17376e-32			AT1G79310	AMC7	-2.60198	9.5386e-111	1.44689e-109
AT4G11340	AT4G11340	3.97514	1.63979e-15	5.6414e-15			AT3G22231	PCC1	-2.59944	3.55241e-20	1.41831e-19
AT4G22105	SCRL26	3.96686	5.68765e-13	1.77813e-12			AT3G03280	AT3G03280	-2.59659	1.80061e-37	1.08494e-36
AT3G50980	XERO1	3.96138	1.45685e-37	8.80503e-37			AT4G03610	AT4G03610	-2.59326	3.80808e-21	1.56703e-20
AT5G58460	CHX25	3.95989	1.93171e-13	6.15016e-13			AT5G59490	AT5G59490	-2.59117	1.09383e-118	1.77143e-117
AT5G66980	AT5G66980	3.95857	2.58702e-14	8.50499e-14			AT1G66500	PCFS1	-2.5903	2.76505e-219	8.25648e-218
AT5G27220	AT5G27220	3.95747	9.41696e-86	1.11232e-84			AT3G55430	AT3G55430	-2.58859	0	0
AT1G23730	BCA3	3.95378	0	0			AT5G45440	AT5G45440	-2.58855	4.23971e-15	1.43546e-14
AT4G25010	SWEET14	3.95093	3.62703e-17	1.3192e-16			AT5G13200	AT5G13200	-2.58596	9.25586e-208	2.58599e-206
AT1G13610	AT1G13610	3.94	1.45695e-18	5.52747e-18			AT5G57510	AT5G57510	-2.58549	3.52972e-21	1.45412e-20
AT4G32280	IAA29	3.93185	4.4945e-65	4.22101e-64			AT4G39890	RABH1C	-2.58485	1.40505e-106	2.05464e-105
AT5G63085	AT5G63085	3.93002	2.15158e-13	6.83576e-13			AT1G77855	AT1G77855	-2.58338	2.75446e-38	1.69028e-37
AT5G61620	AT5G61620	3.92632	3.65944e-18	1.3743e-17			AT1G58140	AT1G58140	-2.58245	4.78811e-21	1.96149e-20
AT4G29550	AT4G29550	3.9217	1.61451e-109	2.42887e-108			AT1G65790	SD17	-2.58203	1.72015e-26	8.17174e-26
AT5G37300	WSD1	3.91967	1.90761e-11	5.60728e-11			AT3G46880	AT3G46880	-2.58196	8.24602e-08	2.01241e-07
AT1G75300	AT1G75300	3.91958	2.77509e-55	2.2686e-54			AT3G08970	ERDJ3A	-2.57925	1.05053e-41	6.87471e-41
AT4G28420	AT4G28420	3.90353	7.9715e-21	3.24329e-20			AT1G57990	PUP18	-2.57372	0	0
AT5G07510	GRP14	3.90328	1.2507e-16	4.46406e-16			AT4G25380	SAP10	-2.56679	1.84363e-06	4.1245e-06
AT2G39370	MAKR4	3.90117	3.27058e-60	2.85104e-59			AT2G40955	AT2G40955	-2.56562	1.71616e-12	5.27258e-12
AT5G44440	AT5G44440	3.89886	6.26756e-15	2.10728e-14			AT4G20860	AT4G20860	-2.563	0	0
AT3G01600	anac044	3.89393	7.58376e-140	1.45758e-138			AT2G45685	AT2G45685	-2.56011	1.91038e-07	4.54912e-07
AT2G47780	AT2G47780	3.89036	6.83108e-34	3.8532e-33			AT5G07070	CIPK2	-2.55936	6.56345e-77	7.01818e-76
AT3G29260	SDR5	3.8842	1.31039e-13	4.19405e-13			AT3G08700	UBC12	-2.55935	3.50595e-05	7.13387e-05
AT2G47770	TSPO	3.88319	1.90709e-18	7.2203e-18			AT3G61390	PUB36	-2.55882	4.74843e-06	1.03211e-05
AT1G62710	bVPE	3.87254	0	0			AT1G21945	AT1G21945	-2.55619	1.51922e-07	3.6434e-07
AT5G07530	GRP17	3.8706	1.66462e-15	5.72527e-15			AT3G55840	HSPRO1	-2.55593	1.22941e-83	1.41244e-82
AT5G40800	AT5G40800	3.86819	2.01895e-17	7.41478e-17			AT3G27831	AT3G27831	-2.55105	0.000149157	0.00028915
AT5G52620	AT5G52620	3.85797	1.17198e-12	3.61891e-12			AT1G36622	AT1G36622	-2.55006	3.95414e-23	1.72288e-22
AT5G58310	MES18	3.85082	6.16523e-182	1.53353e-180			AT2G05940	AT2G05940	-2.54552	0	0
AT3G26790	FUS3	3.84762	1.74845e-09	4.67397e-09			AT1G67470	AT1G67470	-2.54389	2.86739e-261	1.07559e-259
AT2G04070	DTXL2	3.84615	3.55883e-15	1.20877e-14			AT5G13220	TIFY9	-2.54325	9.33892e-209	2.6235e-207
AT3G50090	SDN4	3.84455	7.81542e-12	2.33724e-11			AT3G57520	RFS2	-2.5426	0	0
AT5G35600	HDA7	3.83579	2.23983e-10	6.25309e-10			AT3G59080	AT3G59080	-2.53665	0	0
AT4G14165	AT4G14165	3.83189	9.45779e-17	3.39035e-16			AT4G19230	CYP707A1	-2.53523	6.24962e-228	1.95979e-226
AT3G49570	LSU3	3.82737	2.25301e-39	1.41407e-38			AT3G45970	EXLA1	-2.53419	0	0
AT4G10270	AT4G10270	3.81686	3.46486e-53	2.74489e-52			AT5G19110	AT5G19110	-2.53105	2.07124e-207	5.77422e-206
AT3G12910	AT3G12910	3.81233	1.88216e-26	8.92981e-26			AT1G26540	AT1G26540	-2.52487	2.35483e-16	8.3399e-16
AT5G09360	LAC14	3.81141	8.30892e-28	4.07806e-27			AT4G18950	AT4G18950	-2.52183	0	0
AT1G78360	GSTU21	3.80238	1.14102e-12	3.52501e-12			AT1G03800	ERF10	-2.51845	1.41024e-06	3.17965e-06
AT4G00416	MBD3	3.79098	1.82397e-20	7.34289e-20			AT5G47740	AT5G47740	-2.51637	1.00857e-80	1.122e-79
AT1G24580	AT1G24580	3.79097	1.36473e-59	1.17804e-58			AT1G66180	AT1G66180	-2.51625	0	0
AT4G12500	AT4G12500	3.78984	4.94811e-98	6.64068e-97			AT3G22060	CRRSP38	-2.51036	1.84721e-119	3.00479e-118
AT1G61800	GPT2	3.78132	0	0			AT3G27970	AT3G27970	-2.5026	5.02143e-06	1.08932e-05
AT4G26466	LRE	3.77691	1.29873e-24	5.88286e-24			AT5G19240	AT5G19240	-2.50237	0	0
AT2G39820	EIF6-1	3.7763	1.25235e-24	5.6768e-24			AT4G21830	MSRB7	-2.50087	0	0
AT1G05310	PME8	3.77184	0	0			AT2G01300	AT2G01300	-2.50076	6.76981e-126	1.17033e-124
AT4G29850	AT4G29850	3.77057	4.57567e-105	6.57849e-104			AT5G37770	CML24	-2.49886	0	0
AT4G12470	AZI1	3.77024	0	0			AT1G18773	AT1G18773	-2.49587	6.567e-49	4.82912e-48
AT5G59320	LTP3	3.77003	0	0			AT1G50130	AT1G50130	-2.48901	0.000200403	0.000384479
AT2G42990	AT2G42990	3.76176	1.34877e-21	5.62245e-21			AT1G70800	AT1G70800	-2.4884	1.00222e-81	1.12416e-80
AT1G52696	AT1G52696	3.75917	9.01723e-11	2.56719e-10			AT5G39785	AT5G39785	-2.4841	6.47054e-166	1.47882e-164
AT5G20310	AT5G20310	3.75505	8.83111e-12	2.63545e-11			AT1G63720	AT1G63720	-2.48215	1.25031e-252	4.48012e-251
AT1G13607	AT1G13607	3.75492	1.78916e-08	4.54564e-08			AT1G34100	AT1G34100	-2.47907	2.49576e-07	5.90246e-07
AT3G23635	RTFL13	3.75117	2.38008e-17	8.71981e-17			AT3G44790	AT3G44790	-2.4789	0.000144535	0.000280486
AT5G19880	PER58	3.75113	2.49201e-13	7.90067e-13			AT2G21235	AT2G21235	-2.47107	2.48215e-05	5.12018e-05
AT3G57510	ADPG1	3.74932	3.56826e-12	1.08149e-11			AT3G52400	SYP122	-2.46976	0	0
AT3G54510	AT3G54510	3.73902	1.63663e-76	1.73841e-75			AT1G21550	CML44	-2.46671	2.09775e-64	1.95221e-63
AT2G47120	SDR3C	3.73578	2.30767e-11	6.76226e-11			AT5G63130	AT5G63130	-2.46491	4.13854e-129	7.32247e-128
AT2G01770	VIT1	3.73466	1.83345e-40	1.17525e-39			AT5G22690	AT5G22690	-2.46286	0	0
AT2G02990	RNS1	3.72357	3.44351e-41	2.23292e-40			AT1G66050	ORTH5	-2.46059	2.55619e-28	1.27115e-27
AT1G07540	TRP5	3.72305	5.93567e-10	1.62383e-09			AT2G03240	PHO1-H5	-2.4604	0	0
AT5G24240	PI4KG3	3.72064	1.09414e-75	1.14932e-74			AT1G05340	AT1G05340	-2.45848	0	0
AT4G09875	AT4G09875	3.71	6.44498e-54	5.15679e-53			AT5G44065	AT5G44065	-2.45491	9.34187e-07	2.12878e-06
AT4G26460	AT4G26460	3.69138	7.36547e-30	3.79532e-29			AT2G24100	AT2G24100	-2.45275	2.76166e-295	1.20947e-293
AT5G05020	AT5G05020	3.68153	3.74538e-13	1.17999e-12			AT4G03935	AT4G03935	-2.45076	5.22607e-118	8.42087e-117
AT5G24560	PP2B12	3.67312	9.19437e-11	2.61588e-10			AT1G65760	AT1G65760	-2.45032	0.000194764	0.000374109
AT3G19920	AT3G19920	3.67086	6.3386e-19	2.43617e-18			AT1G23710	AT1G23710	-2.44643	0	0
AT4G22960	AT4G22960	3.66951	1.60578e-41	1.04655e-40			AT5G35580	AT5G35580	-2.44258	1.95952e-142	3.84402e-141
AT3G60730	PME36	3.66247	9.57119e-105	1.36762e-103			AT3G49530	NAC062	-2.44236	0	0
AT1G20860	PHT1-8	3.64952	4.79531e-16	1.67836e-15			AT5G06320	NHL3	-2.43865	0	0
AT1G75290	AT1G75290	3.63799	6.26177e-84	7.22968e-83			AT5G43620	PCFS5	-2.43574	1.88623e-84	2.19961e-83
AT4G08868	AT4G08868	3.63665	1.95907e-20	7.87934e-20			AT2G31690	AT2G31690	-2.43395	0.000259234	0.000492077
AT1G13370	AT1G13370	3.62461	9.64596e-22	4.04467e-21			AT4G26530	AT4G26530	-2.42587	0	0
AT5G39890	PCO2	3.62321	3.03919e-307	1.38795e-305			AT1G57980	PUP22	-2.4217	2.57141e-51	1.97067e-50
AT3G22490	AT3G22490	3.62152	5.92443e-11	1.70085e-10			AT3G46150	AT3G46150	-2.4214	8.5216e-05	0.000168109
AT3G10780	AT3G10780	3.61909	2.54641e-56	2.11061e-55			AT5G24200	AT5G24200	-2.42044	4.73196e-12	1.42728e-11
AT3G15830	AT3G15830	3.61241	1.96588e-21	8.14983e-21			AT2G36590	PROT3	-2.41917	3.11803e-32	1.69246e-31
AT4G08867	AT4G08867	3.6071	2.22269e-08	5.62089e-08			AT2G23810	TET8	-2.4186	0	0
AT3G58210	AT3G58210	3.60296	1.29739e-14	4.3162e-14			AT3G04220	AT3G04220	-2.41316	1.28861e-83	1.47979e-82
AT1G73560	AT1G73560	3.60078	2.66082e-11	7.76957e-11			AT2G27690	CYP94C1	-2.41236	3.6771e-279	1.49773e-277
AT5G39520	AT5G39520	3.59946	2.65824e-70	2.64996e-69			AT4G08112	AT4G08112	-2.41213	2.27697e-05	4.70983e-05
AT5G25390	SHN3	3.59922	5.47284e-11	1.5742e-10			AT1G67000	AT1G67000	-2.41033	3.46566e-09	9.11792e-09
AT5G35870	AT5G35870	3.59889	2.52036e-09	6.67821e-09			AT3G02140	AFP4	-2.40861	3.32629e-159	7.28995e-158
AT3G02810	AT3G02810	3.59757	3.0468e-10	8.45344e-10			AT3G43840	AT3G43840	-2.40751	4.16709e-07	9.72233e-07
AT3G23970	AT3G23970	3.5962	4.47805e-11	1.29314e-10			AT4G00110	GAE3	-2.40226	2.56688e-76	2.7175e-75
AT3G44830	PDAT2	3.59183	5.60376e-24	2.49554e-23			AT5G13660	AT5G13660	-2.40062	1.07345e-112	1.65674e-111
AT4G31690	REM9	3.58896	1.26431e-10	3.57089e-10			AT2G45660	SOC1	-2.39588	1.77487e-270	6.92118e-269
AT4G27210	AT4G27210	3.58734	5.24741e-10	1.43846e-09			AT3G12981	AT3G12981	-2.39541	2.79723e-06	6.17589e-06
AT1G49860	GSTF14	3.58709	0	0			AT4G21840	MSRB8	-2.39517	4.27806e-42	2.81469e-41
AT5G18010	SAUR19	3.58187	3.01308e-16	1.06286e-15			AT3G08720	ATPK2	-2.39351	0	0
AT4G39000	AtGH9B17	3.57932	5.73294e-08	1.41378e-07			AT5G01320	PDC4	-2.38738	5.67443e-09	1.47803e-08
AT4G16540	AT4G16540	3.57398	6.12653e-69	6.00007e-68			AT1G48390	AT1G48390	-2.38729	5.20312e-12	1.56717e-11
AT4G13985	FBD1	3.56599	6.18063e-10	1.68886e-09			AT2G46510	AIB	-2.38525	0	0
AT5G24640	AT5G24640	3.56024	3.80049e-36	2.23016e-35			AT4G01890	AT4G01890	-2.38464	0.000146852	0.000284853
AT4G05380	AT4G05380	3.55613	1.25404e-24	5.68343e-24			AT4G20830	AT4G20830	-2.37954	0	0
AT4G32810	CCD8	3.55444	3.03901e-150	6.27394e-149			AT3G04960	AT3G04960	-2.3744	2.40996e-07	5.70375e-07
AT2G30760	AT2G30760	3.55031	1.86423e-08	4.73402e-08			AT1G13520	AT1G13520	-2.37345	2.83442e-44	1.92569e-43
AT4G30180	AT4G30180	3.54907	1.76856e-38	1.09051e-37			AT2G17840	ERD7	-2.36771	0	0
AT4G33467	AT4G33467	3.5471	4.30956e-81	4.81094e-80			AT5G17850	CCX2	-2.36291	0	0
AT5G63350	AT5G63350	3.54568	2.18998e-92	2.77621e-91			AT1G65390	PP2A5	-2.36195	9.84294e-243	3.34008e-241
AT4G02690	AT4G02690	3.5359	1.24736e-08	3.19637e-08			AT5G40350	MYB24	-2.36097	0.000300601	0.000567431
AT4G21490	NDB3	3.52968	2.19521e-15	7.50984e-15			AT1G20390	AT1G20390	-2.3607	0	0
AT5G40040	RPP2E	3.52345	2.14325e-18	8.10004e-18			AT5G19097	AT5G19097	-2.35865	7.29187e-25	3.32593e-24
AT1G74990	AT1G74990	3.52286	4.05309e-11	1.17267e-10			AT2G32140	AT2G32140	-2.35759	3.25961e-52	2.53371e-51
AT5G61610	AT5G61610	3.51863	1.26163e-107	1.86945e-106			AT4G02170	AT4G02170	-2.3563	2.13507e-13	6.78497e-13
AT5G05390	LAC12	3.51765	1.27399e-21	5.3159e-21			AT1G51090	AT1G51090	-2.35555	1.63552e-59	1.40989e-58
AT2G25820	ERF042	3.51581	3.93155e-09	1.0314e-08			AT5G59510	RTFL5	-2.35499	1.43109e-16	5.1001e-16
AT2G36660	PAB7	3.50983	4.73986e-128	8.31179e-127			AT3G46620	AT3G46620	-2.35338	0	0
AT3G03230	AT3G03230	3.50913	5.34429e-09	1.39345e-08			AT5G64260	EXL2	-2.3505	0	0
AT5G20100	AT5G20100	3.50742	4.80547e-09	1.25577e-08			AT1G71400	RLP12	-2.34727	4.53629e-279	1.84476e-277
AT1G24735	AT1G24735	3.50643	2.19618e-261	8.26229e-260			AT1G67856	AT1G67856	-2.34678	2.29375e-23	1.00541e-22
AT2G25625	AT2G25625	3.49756	9.01221e-27	4.31253e-26			AT5G59270	AT5G59270	-2.34463	2.55141e-05	5.25671e-05
AT4G32490	ENODL4	3.49733	3.5429e-13	1.11702e-12			AT4G05497	FBL9	-2.34386	0.000107616	0.000210724
AT5G43770	AT5G43770	3.49366	1.8439e-36	1.08724e-35			AT5G01732	AT5G01732	-2.34065	3.73944e-18	1.40414e-17
AT5G28715	AT5G28715	3.48179	1.56259e-07	3.74144e-07			AT5G18770	AT5G18770	-2.33853	1.48781e-62	1.34501e-61
AT3G62640	AT3G62640	3.48146	1.04326e-11	3.10182e-11			AT5G28510	BGLU24	-2.33622	0.000374923	0.000701286
AT5G14490	anac085	3.47692	3.26162e-16	1.1491e-15			AT1G56670	LIP4	-2.33548	2.96516e-29	1.50639e-28
AT3G52780	PAP20	3.47407	1.73934e-22	7.45929e-22			AT4G20235	CYP71A28	-2.33443	2.79935e-09	7.40061e-09
AT3G48620	AT3G48620	3.47034	2.64144e-09	6.99182e-09			AT1G32928	AT1G32928	-2.33403	1.22269e-244	4.18788e-243
AT1G71160	KCS7	3.46848	1.78066e-08	4.52538e-08			AT2G36885	AT2G36885	-2.33091	4.211e-218	1.25012e-216
AT2G07070	AT2G07070	3.4644	3.69131e-10	1.02008e-09			AT4G12740	MYH	-2.33042	6.96531e-08	1.70914e-07
AT5G07260	AT5G07260	3.46037	1.62885e-08	4.14699e-08			AT4G34150	AT4G34150	-2.32954	0	0
AT1G63210	AT1G63210	3.45932	5.46072e-09	1.42338e-08			AT1G11670	AT1G11670	-2.32875	0	0
AT3G29788	AT3G29788	3.45883	6.122e-08	1.50726e-07			AT5G51795	AT5G51795	-2.32797	0.000492327	0.000909273
AT1G47980	AT1G47980	3.45624	4.69121e-19	1.8098e-18			AT1G31290	AGO3	-2.32776	9.81853e-99	1.32604e-97
AT4G02700	SULTR3	3.45577	3.26525e-247	1.13508e-245			AT5G46871	AT5G46871	-2.32297	5.57907e-07	1.29167e-06
AT5G44420	PDF1.2A	3.45332	1.92448e-32	1.05038e-31			AT1G64940	CYP89A6	-2.32204	3.94531e-20	1.57223e-19
AT3G12820	AtMYB10	3.45311	4.78327e-47	3.41168e-46			AT5G17165	AT5G17165	-2.31917	3.57911e-08	8.93904e-08
AT3G03670	PER28	3.45236	7.29754e-09	1.89023e-08			AT4G18195	PUP8	-2.31741	6.23662e-29	3.14594e-28
AT2G06985	AT2G06985	3.45094	1.78385e-09	4.76661e-09			AT5G05600	AT5G05600	-2.31613	1.21845e-283	5.1175e-282
AT5G53660	GRF7	3.45085	2.32947e-28	1.15998e-27			AT4G21390	B120	-2.31312	7.58297e-108	1.12624e-106
AT5G50260	CEP1	3.44819	2.47012e-56	2.04804e-55			AT5G49520	WRKY48	-2.31242	1.69297e-279	6.91767e-278
AT5G02780	GSTL1	3.44221	4.12338e-78	4.47253e-77			AT3G50950	RPP13L4	-2.3104	0	0
AT5G06630	AT5G06630	3.43727	9.44912e-209	2.65155e-207			AT3G29020	MYB110	-2.30958	0.00050248	0.000927488
AT1G73220	2024-10-01	3.43649	4.40822e-46	3.08913e-45			AT5G08790	NAC081	-2.30146	0	0
AT5G18020	SAUR20	3.43563	7.06002e-39	4.38173e-38			AT5G63450	CYP94B1	-2.30026	4.32194e-33	2.39775e-32
AT5G16700	AT5G16700	3.43382	1.01379e-09	2.74265e-09			AT3G13403	AT3G13403	-2.29948	3.98177e-06	8.68417e-06
AT1G06990	AT1G06990	3.43351	1.4972e-11	4.42273e-11			AT5G49730	FRO6	-2.2922	0	0
AT2G35070	AT2G35070	3.43263	4.08965e-18	1.53362e-17			AT2G39570	ACR9	-2.29164	0	0
AT1G25270	AT1G25270	3.42948	3.53522e-09	9.29584e-09			AT3G51560	AT3G51560	-2.29132	0.000382961	0.000715852
AT1G19630	CYP722A1	3.42823	1.00354e-12	3.1059e-12			AT3G44870	AT3G44870	-2.28949	0.000219636	0.000419681
AT1G60970	AT1G60970	3.42241	4.31635e-65	4.05518e-64			AT1G61300	AT1G61300	-2.28766	1.47768e-166	3.38623e-165
AT5G07480	KUOX1	3.421	2.5512e-09	6.75782e-09			AT3G51070	AT3G51070	-2.28289	8.89685e-18	3.30535e-17
AT1G63340	AT1G63340	3.41829	3.61218e-15	1.22656e-14			AT1G53940	GLIP2	-2.28244	1.9188e-25	8.872e-25
AT1G74000	SSL11	3.41787	9.24736e-95	1.2008e-93			AT1G74950	TIFY10B	-2.28102	0	0
AT3G11260	WOX5	3.41523	2.61176e-84	3.04013e-83			AT5G05300	AT5G05300	-2.27606	8.28139e-53	6.51226e-52
AT5G12910	AT5G12910	3.41421	2.32264e-09	6.16644e-09			AT5G43200	AT5G43200	-2.27478	0.000726675	0.00132235
AT4G12890	AT4G12890	3.40874	4.08649e-23	1.78024e-22			AT4G13564	MIR841A	-2.26985	0.000679227	0.00123936
AT5G52500	AT5G52500	3.40246	4.66447e-09	1.22005e-08			AT2G34355	AT2G34355	-2.26706	5.56799e-65	5.22535e-64
AT1G13620	RGF2	3.40053	4.69015e-77	5.0319e-76			AT4G36010	AT4G36010	-2.26692	3.69518e-164	8.36312e-163
AT5G41280	CRRSP57	3.40007	1.09969e-33	6.18123e-33			AT3G13404	AT3G13404	-2.2621	1.06689e-07	2.5828e-07
AT5G44630	BS	3.38728	3.16874e-10	8.78224e-10			AT5G67300	MYB44	-2.26092	0	0
AT3G03620	AT3G03620	3.38613	3.16467e-08	7.9287e-08			AT2G07042	AT2G07042	-2.2601	9.83727e-24	4.35889e-23
AT1G51010	AT1G51010	3.38511	7.8922e-09	2.04076e-08			AT5G58120	AT5G58120	-2.25848	3.3053e-134	6.07473e-133
AT1G26590	AT1G26590	3.38182	6.75777e-30	3.48428e-29			AT5G10946	AT5G10946	-2.25799	2.95243e-46	2.07464e-45
AT4G38860	AT4G38860	3.38128	1.2301e-163	2.7669e-162			AT1G33813	AT1G33813	-2.25712	0.000763764	0.00138709
AT5G60780	NRT2.3	3.38029	7.29523e-21	2.97192e-20			AT5G67080	MAPKKK19	-2.24637	1.22659e-25	5.69917e-25
AT2G36261	AT2G36261	3.37561	7.85994e-08	1.92094e-07			AT4G12917	AT4G12917	-2.24545	5.91511e-84	6.84486e-83
AT5G50790	SWEET10	3.37163	2.89373e-44	1.96547e-43			AT5G64900	PEP1	-2.24143	6.09318e-67	5.84453e-66
AT1G15150	AT1G15150	3.37112	1.18492e-46	8.39999e-46			AT5G64850	AT5G64850	-2.24016	0	0
AT2G25370	AT2G25370	3.36766	8.3296e-08	2.03203e-07			AT1G17255	AT1G17255	-2.23879	7.50579e-25	3.4229e-24
AT4G17980	anac071	3.36686	5.84889e-23	2.53594e-22			AT4G18880	HSFA4A	-2.23742	0	0
AT5G66970	AT5G66970	3.36531	6.24574e-09	1.62288e-08			AT5G63770	DGK2	-2.23733	0	0
AT5G37950	AT5G37950	3.35012	1.40236e-09	3.76846e-09			AT4G36850	AT4G36850	-2.23472	0	0
AT1G28030	AT1G28030	3.34937	2.52806e-08	6.37489e-08			AT4G23515	AT4G23515	-2.23403	2.81185e-26	1.32694e-25
AT5G45180	FMO2	3.34789	5.89118e-12	1.77046e-11			AT1G63090	PP2A11	-2.23402	0	0
AT4G09610	GASA2	3.34719	8.77946e-10	2.38399e-09			AT2G38470	WRKY33	-2.23298	0	0
AT3G30393	AT3G30393	3.34379	7.34908e-15	2.46348e-14			AT3G13210	AT3G13210	-2.23179	1.02408e-10	2.90648e-10
AT2G29090	CYP707A2	3.33924	4.35147e-67	4.17858e-66			AT1G27100	AT1G27100	-2.23025	0	0
AT1G80865	AT1G80865	3.33771	1.73831e-07	4.15055e-07			AT1G08920	SUGTL2	-2.2279	0	0
AT1G56430	NAS4	3.33341	1.10885e-210	3.15303e-209			AT4G03480	AT4G03480	-2.22709	5.65847e-05	0.000113275
AT3G27095	AT3G27095	3.32813	7.2918e-16	2.53654e-15			AT4G07820	AT4G07820	-2.22482	3.36178e-05	6.85247e-05
AT5G57780	AT5G57780	3.32375	9.61819e-214	2.78753e-212			AT2G31210	BHLH91	-2.22127	0.000119758	0.000233731
AT3G29150	AT3G29150	3.3236	6.83071e-08	1.67659e-07			AT5G36925	AT5G36925	-2.21921	2.44873e-31	1.30348e-30
AT3G19940	STP10	3.32191	3.7364e-07	8.73339e-07			AT1G30814	AT1G30814	-2.21508	0.000729613	0.00132732
AT2G23970	AT2G23970	3.32141	3.85735e-16	1.356e-15			AT3G46480	AT3G46480	-2.21248	0.0010108	0.00181426
AT1G29100	AT1G29100	3.31572	1.72738e-10	4.84673e-10			AT3G13405	MIR169A	-2.21218	1.1211e-06	2.54318e-06
AT1G44050	AT1G44050	3.31216	1.27655e-31	6.83922e-31			AT1G13540	AT1G13540	-2.21102	2.68484e-11	7.83793e-11
AT5G39860	PRE1	3.30516	2.56945e-41	1.67037e-40			AT4G39580	AT4G39580	-2.20653	2.43987e-36	1.43568e-35
AT3G50330	HEC2	3.30363	3.12422e-08	7.83043e-08			AT5G60142	AT5G60142	-2.20432	9.41767e-06	2.00283e-05
AT3G20470	GRP-5	3.30208	6.40948e-136	1.1995e-134			AT1G56060	AT1G56060	-2.20339	7.52111e-18	2.79993e-17
AT5G07520	GRP18	3.30171	3.68505e-07	8.61886e-07			AT4G23160	CRK8	-2.20262	9.9052e-07	2.25454e-06
AT1G78450	AT1G78450	3.29954	7.51522e-292	3.24142e-290			AT4G38390	RHS17	-2.20179	6.46409e-41	4.18207e-40
AT5G02390	AT5G02390	3.29932	1.94271e-61	1.72521e-60			AT1G43600	AT1G43600	-2.20019	0.00105535	0.00188986
AT5G05220	AT5G05220	3.29788	2.62504e-16	9.28146e-16			AT4G35480	ATL45	-2.19879	8.18365e-77	8.73605e-76
AT4G25790	AT4G25790	3.29051	4.29872e-77	4.61581e-76			AT5G05190	Y-1	-2.19875	9.26019e-119	1.50061e-117
AT1G67750	AT1G67750	3.28442	0	0			AT5G39150	AT5G39150	-2.19387	8.28727e-22	3.47951e-21
AT1G62500	AT1G62500	3.27868	3.92173e-257	1.43535e-255			AT1G47603	ATPUP19	-2.18918	2.77305e-05	5.69822e-05
AT5G03480	AT5G03480	3.27685	4.7015e-10	1.29213e-09			AT1G49490	PEX2	-2.18872	2.20682e-34	1.25782e-33
AT2G38340	DREB2E	3.27539	3.93178e-22	1.67107e-21			AT3G01840	LYK2	-2.18868	4.32294e-16	1.51572e-15
AT1G64360	AT1G64360	3.26776	8.15378e-261	3.04963e-259			AT4G22460	AT4G22460	-2.18837	5.33192e-13	1.66895e-12
AT4G01265	AT4G01265	3.26702	3.3627e-11	9.7745e-11			AT4G19960	POT9	-2.18751	2.21412e-221	6.69725e-220
AT4G08093	AT4G08093	3.26686	6.0302e-140	1.16073e-138			AT4G26380	AT4G26380	-2.18311	0.00105535	0.00188986
AT3G19230	AT3G19230	3.26208	5.14193e-10	1.41015e-09			AT1G69790	AT1G69790	-2.18224	6.11211e-30	3.15838e-29
AT5G58610	AT5G58610	3.26207	1.55857e-45	1.08213e-44			AT3G59310	AT3G59310	-2.18214	3.48062e-191	9.02566e-190
AT2G01422	AT2G01422	3.259	2.81633e-21	1.16209e-20			AT2G39110	AT2G39110	-2.1774	2.41224e-49	1.7898e-48
AT1G52120	JAL12	3.25899	2.01004e-09	5.35761e-09			AT1G51260	LPAT3	-2.17474	6.57996e-06	1.41532e-05
AT5G20670	AT5G20670	3.25691	3.46898e-25	1.59389e-24			AT1G70780	AT1G70780	-2.17395	1.40671e-87	1.6936e-86
AT1G03710	AT1G03710	3.2488	4.47983e-12	1.35298e-11			AT1G70740	AT1G70740	-2.17133	1.75265e-297	7.70203e-296
AT3G60955	CYP76C8P	3.24855	1.09594e-11	3.25428e-11			AT1G73080	PEPR1	-2.17084	0	0
AT3G05950	AT3G05950	3.2477	1.11072e-30	5.82291e-30			AT4G19200	AT4G19200	-2.17013	0	0
AT4G32500	AKT5	3.2413	6.30061e-10	1.7211e-09			AT5G56700	AT5G56700	-2.1615	1.63596e-12	5.02921e-12
AT4G04760	AT4G04760	3.23957	7.13714e-82	8.02693e-81			AT5G20230	BCB	-2.16135	0	0
AT2G18550	ATHB-21	3.2364	1.30098e-13	4.16482e-13			AT1G52890	NAC019	-2.16132	5.10345e-63	4.65469e-62
AT5G52160	AT5G52160	3.23173	7.03319e-08	1.72464e-07			AT5G47910	RBOHD	-2.15886	0	0
AT4G20450	AT4G20450	3.2315	1.55217e-29	7.92481e-29			AT1G69526	AT1G69526	-2.15857	1.54233e-63	1.41629e-62
AT4G30250	AT4G30250	3.23013	1.60571e-51	1.23353e-50			AT2G38760	ANN3	-2.15633	1.06865e-92	1.36078e-91
AT2G34655	AT2G34655	3.22917	1.99754e-26	9.47022e-26			AT5G56980	AT5G56980	-2.15398	0	0
AT2G26130	AT2G26130	3.22529	3.17105e-07	7.44795e-07			AT4G30440	GAE1	-2.15301	0	0
AT3G18250	AT3G18250	3.22497	3.35728e-52	2.60884e-51			AT1G02660	AT1G02660	-2.15106	0	0
AT4G32212	AT4G32212	3.21893	1.12869e-90	1.40374e-89			AT5G13830	AT5G13830	-2.15061	1.03414e-17	3.83592e-17
AT4G18990	XTH29	3.21613	1.98688e-29	1.01281e-28			AT5G59550	AT5G59550	-2.14918	0	0
AT2G28700	AGL46	3.21388	7.60821e-14	2.45649e-13			AT2G44578	AT2G44578	-2.14849	1.43852e-06	3.23998e-06
AT5G14810	AT5G14810	3.21364	4.126e-102	5.7638e-101			AT1G17620	AT1G17620	-2.14807	0	0
AT5G11320	YUC4	3.21251	1.67338e-24	7.56386e-24			AT1G61470	CAF1-5	-2.14658	3.55174e-34	2.01362e-33
AT5G18320	PUB46	3.20875	3.32372e-19	1.28748e-18			AT2G26390	AT2G26390	-2.14644	2.54752e-07	6.01822e-07
AT3G27500	AT3G27500	3.20861	1.51611e-50	1.14547e-49			AT5G22680	AT5G22680	-2.14479	0.000801443	0.00145222
AT4G00380	FDM2	3.20848	0	0			AT3G15770	AT3G15770	-2.14345	5.0024e-237	1.6537e-235
AT3G07250	AT3G07250	3.20452	5.40476e-26	2.53423e-25			AT1G28380	NSL1	-2.13551	0	0
AT5G18050	SAUR22	3.19337	2.58971e-17	9.47022e-17			AT3G51075	AT3G51075	-2.13359	8.94823e-53	7.02801e-52
AT1G77120	ADH1	3.1919	0	0			AT5G07010	SOT15	-2.12896	4.64276e-71	4.65548e-70
AT2G29380	HAI3	3.19008	4.09625e-10	1.1293e-09			AT1G02310	MAN1	-2.12682	2.56231e-29	1.30354e-28
AT2G32670	VAMP725	3.18291	1.32553e-63	1.21764e-62			AT4G36710	SCL15	-2.12672	0	0
AT3G05150	AT3G05150	3.17879	0	0			AT3G57740	AT3G57740	-2.1246	2.43984e-27	1.185e-26
AT1G34440	AT1G34440	3.17824	1.6662e-09	4.45921e-09			AT1G16120	WAKL1	-2.12093	0.000514578	0.000949068
AT3G54520	AT3G54520	3.17673	9.94796e-11	2.82463e-10			AT3G61640	AGP20	-2.11933	3.30393e-298	1.45441e-296
AT5G54550	AT5G54550	3.17203	7.38889e-08	1.80909e-07			AT5G44620	CYP706A3	-2.11789	5.56025e-05	0.000111422
AT5G38540	JAL43	3.16471	9.63886e-18	3.57843e-17			AT2G04780	FLA7	-2.11775	6.45802e-247	2.23285e-245
AT5G11412	AT5G11412	3.16421	8.2682e-10	2.24707e-09			AT2G39650	AT2G39650	-2.11692	6.53028e-149	1.33738e-147
AT4G36280	AT4G36280	3.16325	1.45272e-252	5.19815e-251			AT5G46900	AT5G46900	-2.11468	1.09614e-79	1.20581e-78
AT1G70440	SRO3	3.16169	5.28531e-39	3.28904e-38			AT3G60700	AT3G60700	-2.11121	1.8095e-05	3.77305e-05
AT5G41761	AT5G41761	3.16152	1.39924e-256	5.0849e-255			AT1G32970	AT1G32970	-2.11113	3.28401e-06	7.20469e-06
AT5G62280	AT5G62280	3.1605	7.15936e-199	1.91664e-197			AT5G63900	AT5G63900	-2.11031	0.00140595	0.0024907
AT1G23965	AT1G23965	3.15909	1.71365e-11	5.04699e-11			AT1G14790	RDR1	-2.1103	2.6962e-51	2.06507e-50
AT1G06080	ADS1	3.15476	1.93774e-255	7.01198e-254			AT3G27210	Y-2	-2.10869	0	0
AT3G23637	DVL21	3.15037	8.29361e-07	1.89784e-06			AT4G23140	CRK6	-2.10851	6.6738e-08	1.63902e-07
AT1G22250	AT1G22250	3.15034	2.10163e-268	8.13351e-267			AT2G27389	AT2G27389	-2.10417	7.55679e-28	3.71246e-27
AT1G02190	AT1G02190	3.1489	5.8756e-15	1.97991e-14			AT5G46915	AT5G46915	-2.10249	0.00030951	0.000583491
AT3G28500	RPP2C	3.14746	2.20054e-27	1.06938e-26			AT5G51780	BHLH36	-2.10142	9.35354e-86	1.10534e-84
AT5G43840	HSFA6A	3.1391	4.20394e-13	1.32235e-12			AT3G47010	AT3G47010	-2.09575	2.27003e-29	1.156e-28
AT2G43371	AT2G43371	3.1309	3.03634e-07	7.14007e-07			AT5G35940	JAL41	-2.09475	4.97039e-86	5.89271e-85
AT1G22090	EMB2204	3.1276	8.57355e-07	1.95962e-06			AT1G29690	CAD1	-2.09437	1.89175e-265	7.23383e-264
AT1G56600	GOLS2	3.12398	7.8627e-78	8.50326e-77			AT2G27310	AT2G27310	-2.094	4.82336e-132	8.69018e-131
AT2G14520	CBSDUF3	3.12356	2.16051e-218	6.42883e-217			AT1G17750	PEPR2	-2.09379	3.97565e-169	9.24285e-168
AT1G21320	AT1G21320	3.11953	3.83128e-34	2.17163e-33			AT2G06050	OPR3	-2.09354	0	0
AT4G19380	FAO4A	3.11494	0	0			AT2G05441	AT2G05441	-2.08987	0.00132888	0.00235934
AT5G61412	AT5G61412	3.11148	3.89878e-21	1.60332e-20			AT2G27260	AT2G27260	-2.08855	4.69312e-100	6.42296e-99
AT5G18080	SAUR24	3.11013	9.9374e-33	5.47283e-32			AT1G09940	HEMA2	-2.08526	0	0
AT5G53870	ENODL1	3.10772	6.4442e-103	9.06647e-102			AT5G10950	AT5G10950	-2.08268	1.35909e-106	1.98857e-105
AT1G23700	AT1G23700	3.10367	7.54682e-26	3.52313e-25			AT4G17230	SCL13	-2.08074	0	0
AT1G20750	AT1G20750	3.10051	3.87421e-08	9.65444e-08			AT3G51680	SDR2A	-2.07957	2.97821e-06	6.5619e-06
AT5G05840	AT5G05840	3.09636	3.00897e-16	1.06155e-15			AT1G69890	AT1G69890	-2.07814	0	0
AT2G40610	EXPA8	3.09373	9.00013e-305	4.06673e-303			AT4G34390	XLG2	-2.07728	0	0
AT1G10680	ABCB10	3.09099	7.09556e-07	1.63112e-06			AT1G45145	TRX5	-2.07652	0	0
AT4G24030	AT4G24030	3.0898	1.49935e-08	3.82375e-08			AT1G76530	AT1G76530	-2.07529	4.17193e-22	1.77138e-21
AT3G50990	PER36	3.08811	5.95733e-07	1.377e-06			AT3G59750	LECRK58	-2.07461	1.5781e-22	6.77349e-22
AT5G23980	FRO4	3.08126	1.56142e-138	2.97203e-137			AT2G32210	AT2G32210	-2.07184	1.39786e-227	4.37812e-226
AT1G50350	AT1G50350	3.07884	7.2286e-07	1.66066e-06			AT1G14490	AHL28	-2.07099	6.08953e-08	1.4997e-07
AT5G27060	AtRLP53	3.07594	6.83862e-26	3.19543e-25			AT2G15029	AT2G15029	-2.07052	0.00199738	0.00348091
AT3G61035	AT3G61035	3.07399	3.45663e-09	9.09601e-09			AT5G62470	MYB96	-2.06909	0	0
AT2G13380	AT2G13380	3.07376	3.13465e-06	6.89238e-06			AT5G62330	AT5G62330	-2.065	4.48613e-06	9.76589e-06
AT5G20820	AT5G20820	3.07077	2.75455e-24	1.23745e-23			AT1G75000	AT1G75000	-2.06323	3.63488e-83	4.1574e-82
AT3G51200	AT3G51200	3.06824	1.46745e-07	3.52253e-07			AT3G25250	OXI1	-2.06288	1.87178e-184	4.73864e-183
AT1G22150	SULTR1	3.06818	2.87775e-13	9.09998e-13			AT5G47240	NUDT8	-2.06278	1.02454e-108	1.53322e-107
AT5G17220	GSTF12	3.06791	7.71988e-32	4.15511e-31			AT4G39670	AT4G39670	-2.06208	8.26766e-70	8.19727e-69
AT4G30880	AT4G30880	3.06015	3.64409e-06	7.97009e-06			AT5G09980	PEP4	-2.06137	4.85746e-64	4.49434e-63
AT5G49080	AT5G49080	3.0548	1.71957e-124	2.93702e-123			AT5G25920	AT5G25920	-2.06117	0.00196049	0.00341987
AT5G38900	AT5G38900	3.05333	4.06548e-102	5.68236e-101			AT5G50180	AT5G50180	-2.06042	0	0
AT5G10140	FLC	3.05295	0	0			AT1G50790	AT1G50790	-2.05861	1.43274e-17	5.28918e-17
AT5G02760	AT5G02760	3.05235	5.2111e-234	1.69212e-232			AT1G14540	PER4	-2.05651	1.00639e-78	1.09765e-77
AT4G08570	AT4G08570	3.0509	1.02405e-18	3.91235e-18			AT1G44350	ILL6	-2.05567	1.15933e-188	2.97317e-187
AT1G78030	AT1G78030	3.04716	1.86661e-31	9.97757e-31			AT2G11910	AT2G11910	-2.05183	0	0
AT1G11572	AT1G11572	3.04346	1.07569e-07	2.60386e-07			AT5G18790	AT5G18790	-2.04873	1.32982e-49	9.89828e-49
AT4G34770	AT4G34770	3.04269	2.16822e-35	1.25707e-34			AT3G23510	AT3G23510	-2.04755	4.0215e-137	7.60937e-136
AT3G48920	AtMYB45	3.03999	3.926e-51	3.00072e-50			AT5G66210	CPK28	-2.04467	0	0
AT5G03860	MLS	3.03722	0	0			AT2G13960	AT2G13960	-2.03677	1.97839e-13	6.29643e-13
AT1G71380	CEL3	3.03313	1.32911e-59	1.14768e-58			AT5G62865	AT5G62865	-2.03613	5.51452e-81	6.15071e-80
AT5G52900	MAKR6	3.03302	9.816e-140	1.88379e-138			AT4G22780	ACR7	-2.03178	0	0
AT3G15720	AT3G15720	3.03207	1.81092e-162	4.0485e-161			AT5G13655	AT5G13655	-2.03168	0.00213571	0.00370861
AT5G38195	AT5G38195	3.03055	3.06972e-07	7.21393e-07			AT3G25190	AT3G25190	-2.03142	7.55727e-77	8.07074e-76
AT1G73830	BEE3	3.02106	1.92053e-78	2.09023e-77			AT1G75040	PR5	-2.03126	5.69504e-74	5.88334e-73
AT1G66770	SWEET6	3.021	3.18686e-07	7.4844e-07			AT2G26190	AT2G26190	-2.03029	0	0
AT2G38520	AT2G38520	3.01826	2.04232e-08	5.17702e-08			AT5G38350	AT5G38350	-2.02822	1.37686e-26	6.55792e-26
AT4G12490	AT4G12490	3.01702	7.63121e-63	6.9355e-62			AT2G32780	UBP1	-2.0258	0.0012184	0.00217106
AT5G61160	ACT	3.01695	1.02776e-143	2.0396e-142			AT5G16200	AT5G16200	-2.02541	7.83847e-63	7.12133e-62
AT4G39510	CYP96A12	3.01418	1.83486e-119	2.9866e-118			AT3G54880	AT3G54880	-2.02423	0	0
AT4G18620	PYL13	3.0124	1.3856e-07	3.33013e-07			AT3G21070	NADK1	-2.02366	0	0
AT1G77100	PER13	3.00806	5.13024e-09	1.33846e-08			AT5G25930	AT5G25930	-2.02263	4.0783e-247	1.4158e-245
AT4G38850	SAUR15	3.00742	1.21837e-33	6.84081e-33			AT2G20770	GCL2	-2.02086	1.40159e-32	7.68099e-32
AT1G30220	INT2	3.00608	3.53227e-89	4.31553e-88			AT1G69050	AT1G69050	-2.01744	1.75579e-17	6.46218e-17
AT4G29570	CDA8	3.00287	1.06696e-06	2.42292e-06			AT3G19970	AT3G19970	-2.01542	2.323e-99	3.15899e-98
AT4G22090	AT4G22090	3.00245	2.6955e-07	6.35432e-07			AT3G29810	COBL3	-2.00699	7.29968e-45	5.01388e-44
AT2G32830	PHT1-5	3.00069	5.62907e-57	4.71143e-56			AT1G33340	AT1G33340	-2.00626	1.13445e-42	7.52774e-42
AT1G11230	AT1G11230	2.99829	4.97152e-06	1.07877e-05			AT5G17340	AT5G17340	-2.00506	5.04708e-05	0.000101432
AT5G56300	GAMT2	2.99703	1.85153e-22	7.93511e-22			AT5G22570	WRKY38	-2.00362	1.3566e-16	4.83868e-16
AT2G42440	LBD17	2.99148	4.78576e-08	1.18602e-07			AT1G02810	PME7	-2.00318	8.04198e-162	1.7854e-160
AT2G42530	COR15B	2.991	0	0			AT2G40300	FER4	-2.0026	0	0
AT1G29395	COR413IM1	2.98986	0	0			AT5G39180	AT5G39180	-2.00161	2.15566e-13	6.84785e-13
AT4G29548	AT4G29548	2.98863	1.56902e-07	3.75614e-07			AT5G64750	ABR1	-1.99971	9.68653e-52	7.46597e-51
AT5G56510	APUM12	2.98861	5.22651e-22	2.21291e-21			AT4G01090	AT4G01090	-1.99918	0	0
AT4G33560	AT4G33560	2.98734	1.67068e-92	2.12e-91			AT5G66675	AT5G66675	-1.9966	0	0
AT4G28240	AT4G28240	2.98573	0	0			AT2G32150	AT2G32150	-1.9958	0	0
AT1G29460	SAUR65	2.98369	2.92514e-60	2.55252e-59			AT5G38344	AT5G38344	-1.99561	1.00905e-16	3.61361e-16
AT2G36090	AT2G36090	2.98068	4.05026e-91	5.06925e-90			AT1G48710	AT1G48710	-1.99074	1.22667e-07	2.95925e-07
AT5G53710	AT5G53710	2.97906	4.27855e-10	1.17893e-09			AT1G06148	AT1G06148	-1.98941	4.14512e-08	1.03055e-07
AT5G27345	AT5G27345	2.9774	1.58245e-14	5.24482e-14			AT4G03816	AT4G03816	-1.98397	5.87536e-09	1.52881e-08
AT1G57800	ORTH3	2.97607	3.04725e-06	6.70708e-06			AT1G07150	MAPKKK13	-1.98322	4.15778e-38	2.5429e-37
AT5G53700	AT5G53700	2.9752	1.24578e-45	8.66598e-45			AT4G25390	AT4G25390	-1.98265	2.06278e-264	7.85266e-263
AT3G23460	AT3G23460	2.97226	7.7097e-07	1.76849e-06			AT1G02020	AT1G02020	-1.98113	6.30782e-84	7.27957e-83
AT5G17780	AT5G17780	2.96474	2.91359e-177	7.06208e-176			AT4G23570	SGT1A	-1.98069	2.23452e-250	7.85301e-249
AT5G61630	AT5G61630	2.96441	1.8169e-06	4.0679e-06			AT5G03130	AT5G03130	-1.97887	0.00103887	0.0018615
AT5G02210	AT5G02210	2.96259	8.5464e-07	1.95359e-06			AT4G18280	AT4G18280	-1.97638	6.13777e-208	1.7167e-206
AT4G25420	GA20OX1	2.9612	1.88874e-26	8.95772e-26			AT1G01880	GEN1	-1.97483	2.03449e-21	8.42743e-21
AT4G05030	AT4G05030	2.96049	1.05103e-07	2.54655e-07			AT4G40020	AT4G40020	-1.97398	0.000172926	0.000333612
AT1G78970	LUP1	2.95782	0	0			AT5G41100	AT5G41100	-1.97249	6.32439e-265	2.41117e-263
AT2G04050	DTXL1	2.9566	3.33923e-199	8.94886e-198			AT5G48110	AT5G48110	-1.97151	5.67847e-242	1.91424e-240
AT3G05860	AT3G05860	2.94897	2.33062e-07	5.5216e-07			AT2G11520	CRCK3	-1.96933	6.92966e-184	1.7457e-182
AT5G17810	WOX12	2.94755	7.42215e-21	3.02266e-20			AT4G01525	SADHU5-1	-1.96778	4.84269e-10	1.33022e-09
AT3G12450	AT3G12450	2.94723	8.73982e-06	1.863e-05			AT5G24140	SQE4	-1.96708	1.46963e-18	5.57393e-18
AT5G62400	AT5G62400	2.94265	3.27024e-15	1.11193e-14			AT2G39200	MLO12	-1.96423	2.98257e-35	1.72452e-34
AT4G32510	BOR7	2.93987	1.52156e-29	7.77317e-29			AT3G09940	MDHAR	-1.96305	0	0
AT1G53490	HEI10	2.93795	3.55052e-106	5.16549e-105			AT1G09575	AT1G09575	-1.96285	1.22172e-108	1.82617e-107
AT1G58330	ZW2	2.93643	5.80236e-07	1.34227e-06			AT1G69900	AT1G69900	-1.96136	2.0355e-131	3.65706e-130
AT5G27630	ACBP5	2.9355	6.95654e-274	2.7718e-272			AT3G24520	HSFC1	-1.96121	9.31562e-211	2.65185e-209
AT1G76878	AT1G76878	2.93537	9.03157e-06	1.92279e-05			AT5G35735	AT5G35735	-1.95684	0	0
AT5G41460	AT5G41460	2.93211	2.27578e-249	7.96522e-248			AT5G49280	AT5G49280	-1.95665	0	0
AT5G05040	AT5G05040	2.93083	3.90942e-06	8.52927e-06			AT3G13600	AT3G13600	-1.95442	3.36148e-46	2.36013e-45
AT2G21640	AT2G21640	2.93032	1.49419e-208	4.18832e-207			AT1G09600	AT1G09600	-1.95292	1.10296e-06	2.50312e-06
AT4G39210	APL3	2.92993	0	0			AT5G26200	AT5G26200	-1.95112	1.84006e-31	9.83977e-31
AT1G80220	AT1G80220	2.92899	2.87736e-06	6.34897e-06			AT4G36550	PUB5	-1.9497	1.43514e-229	4.52256e-228
AT1G30740	AT1G30740	2.92556	1.79554e-31	9.6037e-31			AT3G25990	GT-4	-1.94922	3.18198e-06	6.99102e-06
AT2G30750	CYP71A12	2.92451	7.67434e-92	9.69033e-91			AT4G29670	ACHT2	-1.94672	0	0
AT5G36270	AT5G36270	2.92396	1.87365e-16	6.65635e-16			AT4G13493	MIR850A	-1.94579	8.24379e-20	3.24832e-19
AT3G46270	AT3G46270	2.92353	2.87794e-32	1.56413e-31			AT1G71120	GLIP6	-1.94397	0.00210007	0.00365044
AT2G44460	BGLU28	2.92034	1.01319e-175	2.43051e-174			AT5G28080	WNK9	-1.94205	1.73686e-45	1.20494e-44
AT1G67770	TEL2	2.9191	9.60941e-20	3.77828e-19			AT4G22620	AT4G22620	-1.94189	6.23848e-05	0.000124507
AT2G46640	AT2G46640	2.91827	2.0768e-122	3.47535e-121			AT3G50970	XERO2	-1.94076	1.57898e-286	6.67549e-285
AT4G09820	TT8	2.91689	2.17207e-13	6.89913e-13			AT2G05980	AT2G05980	-1.9405	0.00331555	0.00563852
AT1G11920	AT1G11920	2.91683	7.19793e-07	1.65376e-06			AT5G04340	ZAT6	-1.93801	1.98678e-212	5.71282e-211
AT5G57390	AIL5	2.91624	1.25033e-224	3.8548e-223			AT3G04445	AT3G04445	-1.93756	4.19828e-13	1.32073e-12
AT5G47370	HAT2	2.91615	0	0			AT1G70782	CPuORF28	-1.93727	3.35556e-54	2.69497e-53
AT1G08090	NRT2.1	2.91402	7.28681e-13	2.26921e-12			AT1G48405	AT1G48405	-1.93683	0.00128997	0.00229364
AT4G33870	PER48	2.91379	1.31558e-06	2.97225e-06			AT5G10760	AT5G10760	-1.93545	1.81011e-21	7.51258e-21
AT4G27530	AT4G27530	2.91268	4.71311e-18	1.76509e-17			AT3G17860	TIFY6B	-1.93285	5.4644e-280	2.23997e-278
AT3G45860	CRK4	2.9097	7.0314e-142	1.37096e-140			AT2G24190	SDR2B	-1.93282	2.40381e-28	1.19677e-27
AT4G15396	CYP702A6	2.90918	6.03304e-142	1.1781e-140			AT1G22490	BHLH94	-1.93195	2.46435e-26	1.16446e-25
AT5G06640	AT5G06640	2.90897	3.14575e-97	4.18236e-96			AT1G69930	GSTU11	-1.93092	4.71169e-13	1.47843e-12
AT1G62262	SLAH4	2.90744	3.90429e-29	1.97723e-28			AT5G30495	AT5G30495	-1.9293	7.00565e-84	8.07762e-83
AT5G09540	AT5G09540	2.90676	2.29948e-146	4.63515e-145			AT3G50260	ERF011	-1.92802	3.47484e-90	4.29038e-89
AT5G61890	ERF114	2.90316	1.02229e-23	4.52819e-23			AT1G77530	AT1G77530	-1.92775	7.35487e-72	7.45084e-71
AT3G16360	AHP4	2.90268	1.64461e-126	2.8566e-125			AT1G04050	SUVR1	-1.92457	7.7375e-38	4.70308e-37
AT2G05640	AT2G05640	2.89804	5.55516e-06	1.20165e-05			AT3G28850	AT3G28850	-1.92457	3.99835e-65	3.75781e-64
AT1G29490	SAUR68	2.89557	3.26e-06	7.15385e-06			AT1G61370	AT1G61370	-1.92421	1.94015e-68	1.89071e-67
AT5G48130	AT5G48130	2.89208	2.7992e-23	1.22465e-22			AT5G62570	CBP60A	-1.91933	0	0
AT1G79110	BRG2	2.8911	0	0			AT3G26980	MUB4	-1.9191	0	0
AT2G37370	AT2G37370	2.89081	1.16943e-29	5.99578e-29			AT1G11265	AT1G11265	-1.91866	8.28041e-14	2.66982e-13
AT5G03230	AT5G03230	2.88793	1.01492e-306	4.62673e-305			AT1G71520	ERF020	-1.9176	1.05191e-09	2.84403e-09
AT5G18030	SAUR21	2.88284	1.08615e-31	5.8277e-31			AT1G20150	AT1G20150	-1.91743	0.00402893	0.00678373
AT5G65320	BHLH99	2.87802	4.58782e-31	2.42851e-30			AT1G29730	AT1G29730	-1.91578	6.17132e-15	2.07601e-14
AT4G19850	PP2A2	2.8747	1.75376e-11	5.16216e-11			AT5G44590	AT5G44590	-1.91512	0.000489511	0.000904332
AT1G24270	AT1G24270	2.87456	1.61427e-08	4.11149e-08			AT1G20680	AT1G20680	-1.91187	0.00356968	0.00605022
AT1G23160	AT1G23160	2.87082	3.2945e-40	2.10224e-39			AT3G21460	GRXS10	-1.91105	0.000461599	0.000855233
AT2G46860	PPA3	2.86903	3.52431e-39	2.2028e-38			AT1G67920	AT1G67920	-1.90757	1.17264e-82	1.3317e-81
AT5G57760	AT5G57760	2.86436	1.64427e-22	7.05275e-22			AT1G33670	AT1G33670	-1.90586	0.00373928	0.00632179
AT1G80760	NIP6-1	2.86194	8.0895e-65	7.58058e-64			AT1G53890	AT1G53890	-1.90535	5.51437e-46	3.8569e-45
AT1G04880	HMGB15	2.86115	1.80402e-34	1.03006e-33			AT3G10940	LSF2	-1.90528	2.3381e-123	3.94352e-122
AT3G21500	DXPS1	2.85824	6.27211e-08	1.54318e-07			AT3G59350	PTI13	-1.90486	0	0
AT1G60075	AT1G60075	2.85773	1.50028e-05	3.14542e-05			AT1G53870	AT1G53870	-1.90426	1.91184e-46	1.34824e-45
AT3G19700	IKU2	2.85685	9.35828e-07	2.13233e-06			AT5G11650	AT5G11650	-1.9025	0	0
AT3G05690	NFYA2	2.85611	0	0			AT1G51270	PVA14	-1.90094	7.68115e-289	3.27439e-287
AT5G02110	CYCD7-1	2.85564	1.33767e-06	3.02054e-06			AT4G19920	AT4G19920	-1.89939	1.03208e-10	2.92823e-10
AT5G09970	CYP78A7	2.85518	1.73491e-73	1.78652e-72			AT5G23570	SGS3	-1.89513	2.01545e-99	2.74367e-98
AT1G17744	AT1G17744	2.85239	1.56834e-08	3.99689e-08			AT5G10695	AT5G10695	-1.89333	3.15582e-176	7.60603e-175
AT3G51410	AT3G51410	2.84357	1.93388e-23	8.49846e-23			AT1G01470	LEA14	-1.89221	0	0
AT5G24660	LSU2	2.84357	3.12788e-87	3.74995e-86			AT1G13260	RAV1	-1.89209	1.35105e-256	4.92373e-255
AT3G50610	AT3G50610	2.84314	1.48055e-06	3.33173e-06			AT5G01900	WRKY62	-1.89182	0.00296648	0.0050742
AT1G02800	CEL2	2.84057	6.76383e-47	4.81359e-46			AT3G14590	NTMC2T6.2	-1.89173	1.56685e-200	4.22111e-199
AT5G24080	AT5G24080	2.83986	2.13682e-11	6.27093e-11			AT4G21926	AT4G21926	-1.88937	0.00499882	0.00831893
AT1G66830	AT1G66830	2.83932	4.24317e-33	2.35456e-32			AT1G51920	AT1G51920	-1.88926	0.00486203	0.00810391
AT1G26390	AT1G26390	2.83346	3.00572e-08	7.54227e-08			AT4G39030	EDS5	-1.88573	6.82002e-119	1.10588e-117
AT5G17970	AT5G17970	2.83243	1.71711e-07	4.10108e-07			AT3G18710	PUB29	-1.88537	1.48917e-143	2.95299e-142
AT1G31510	AT1G31510	2.83192	1.11477e-06	2.52949e-06			AT5G40000	AT5G40000	-1.88389	7.13171e-07	1.63899e-06
AT4G16162	AT4G16162	2.83101	8.84894e-33	4.87758e-32			AT5G27920	AT5G27920	-1.88373	0	0
AT2G40790	CXXS2	2.83079	4.43244e-12	1.33946e-11			AT2G23100	AT2G23100	-1.88329	4.18583e-61	3.69797e-60
AT2G14470	AT2G14470	2.82951	1.05656e-05	2.23859e-05			AT5G03210	AT5G03210	-1.88002	1.35687e-25	6.29878e-25
AT5G44940	AT5G44940	2.82694	1.78041e-07	4.24673e-07			AT1G50740	FAX5	-1.87578	1.17924e-281	4.90455e-280
AT4G28700	AMT1-4	2.82565	3.56996e-15	1.21238e-14			AT1G05575	AT1G05575	-1.87475	6.51147e-114	1.01474e-112
AT3G17203	GA2OX5	2.82553	5.96544e-06	1.28746e-05			AT3G60930	AT3G60930	-1.87322	3.59212e-46	2.51862e-45
AT5G64690	AT5G64690	2.82166	3.03002e-50	2.27785e-49			AT3G46070	AT3G46070	-1.8732	0.00443098	0.00742117
AT5G55370	AT2	2.82131	3.12929e-20	1.25054e-19			AT2G36220	AT2G36220	-1.873	5.92022e-251	2.09208e-249
AT5G66150	AT5G66150	2.81999	6.82719e-17	2.45767e-16			AT3G06750	AT3G06750	-1.87194	1.06637e-150	2.21219e-149
AT4G28680	TYRDC	2.81951	5.45088e-39	3.39125e-38			AT3G54200	AT3G54200	-1.87154	2.63196e-222	7.99891e-221
AT4G24000	CSLG2	2.81698	4.67885e-08	1.16002e-07			AT1G13340	AT1G13340	-1.87134	2.17226e-103	3.06968e-102
AT3G33528	AT3G33528	2.81644	4.40737e-10	1.21351e-09			AT5G01380	GT-3A	-1.87021	1.03406e-38	6.38991e-38
AT4G27590	AT4G27590	2.81626	1.19415e-35	6.94532e-35			AT1G53625	AT1G53625	-1.86979	6.40681e-20	2.53463e-19
AT1G29870	AT1G29870	2.8097	1.09837e-05	2.32314e-05			AT1G30720	AT1G30720	-1.86815	1.78072e-126	3.09092e-125
AT1G01680	PUB54	2.8086	7.94381e-21	3.23253e-20			AT5G45113	AT5G45113	-1.86808	0.00304055	0.00519569
AT1G49475	AT1G49475	2.80797	2.40494e-39	1.50868e-38			AT5G03350	AT5G03350	-1.86794	1.49143e-17	5.49948e-17
AT3G11165	AT3G11165	2.80312	1.66833e-07	3.98866e-07			AT1G33610	AT1G33610	-1.86776	2.16939e-119	3.52439e-118
AT5G07600	AT5G07600	2.80251	2.84002e-09	7.50503e-09			AT5G42650	CYP74A	-1.86612	3.62606e-276	1.45383e-274
AT1G12130	AT1G12130	2.79836	3.72027e-16	1.30871e-15			AT3G25655	IDL1	-1.86084	3.05325e-14	1.00044e-13
AT1G30560	AT1G30560	2.79704	4.96932e-07	1.15373e-06			AT3G60935	AT3G60935	-1.85893	0.00571214	0.00944527
AT3G16175	AT3G16175	2.797	1.86115e-38	1.14622e-37			AT5G48980	AT5G48980	-1.85588	0.00499196	0.00830858
AT4G10910	AT4G10910	2.79532	4.84339e-08	1.19973e-07			AT4G25830	AT4G25830	-1.85414	2.99712e-152	6.24278e-151
AT1G14960	AT1G14960	2.78375	3.06034e-76	3.23724e-75			AT1G14040	PHO1	-1.8536	3.48393e-227	1.08852e-225
AT5G40590	AT5G40590	2.78337	2.30641e-31	1.22977e-30			AT5G59580	UGT76E1	-1.85176	4.86787e-12	1.46741e-11
AT5G65510	AIL7	2.78129	7.72515e-55	6.26721e-54			AT1G73165	CLE1	-1.84947	0.0011843	0.00211235
AT2G25540	CESA10	2.77455	1.08832e-05	2.30322e-05			AT3G12240	SCPL15	-1.84672	3.10622e-11	9.04334e-11
AT1G23201	AT1G23201	2.7725	5.65064e-08	1.39416e-07			AT5G18840	AT5G18840	-1.84546	1.67616e-76	1.77967e-75
AT1G44010	AT1G44010	2.77227	3.08908e-05	6.31873e-05			AT1G27770	ACA1	-1.84255	0	0
AT1G24010	AT1G24010	2.77034	4.58427e-06	9.9736e-06			AT2G47190	ATMYB2	-1.84183	1.42838e-13	4.56356e-13
AT4G35370	AT4G35370	2.76554	1.84455e-06	4.12619e-06			AT3G09830	AT3G09830	-1.84175	8.28748e-247	2.86153e-245
AT1G27860	AT1G27860	2.7651	1.92913e-05	4.01367e-05			AT4G10695	AT4G10695	-1.84102	0.000294682	0.000556603
AT3G11325	AT3G11325	2.76259	9.80869e-06	2.08396e-05			AT3G57930	AT3G57930	-1.84081	8.4407e-178	2.04783e-176
AT5G51850	AT5G51850	2.76187	3.01996e-72	3.07029e-71			AT5G65470	AT5G65470	-1.83922	0	0
AT2G16060	AHB1	2.76182	0	0			AT5G36970	NHL25	-1.8364	0.00288	0.00493252
AT5G25110	CIPK25	2.76155	2.15623e-107	3.18768e-106			AT5G55570	AT5G55570	-1.83581	1.78775e-19	6.97567e-19
AT4G32950	AT4G32950	2.76101	1.765e-19	6.88897e-19			AT1G73510	AT1G73510	-1.83459	0.000227296	0.000433895
AT3G14950	TTL2	2.76098	2.40129e-16	8.50208e-16			AT1G76965	AT1G76965	-1.8343	0.00518803	0.00861589
AT2G41230	ORS1	2.75874	7.8241e-40	4.95436e-39			AT1G11070	AT1G11070	-1.83358	1.24754e-13	3.99573e-13
AT5G26805	AT5G26805	2.75844	2.34959e-06	5.21136e-06			AT3G09870	AT3G09870	-1.83342	2.34072e-07	5.54501e-07
AT5G57540	XTH13	2.75792	3.09978e-55	2.5308e-54			AT1G66170	MMD1	-1.83313	0.000645697	0.00118036
AT3G17130	AT3G17130	2.75595	2.49646e-07	5.90357e-07			AT3G30764	AT3G30764	-1.83272	0.00539376	0.00894421
AT3G63088	RTFL14	2.75502	3.40715e-08	8.52371e-08			AT1G70920	ATHB-X	-1.83232	3.15212e-13	9.95528e-13
AT5G42830	AT5G42830	2.75372	5.51347e-90	6.79764e-89			AT1G79245	AT1G79245	-1.83093	0	0
AT3G18450	PCR5	2.75185	4.6454e-10	1.27712e-09			AT5G03010	AT5G03010	-1.82983	0.00623466	0.0102669
AT3G56980	ORG3	2.74097	1.08795e-22	4.68378e-22			AT2G34430	LHB1B1	-1.82907	2.9728e-135	5.5311e-134
AT5G23810	AAP7	2.73937	9.58976e-220	2.87356e-218			AT5G15190	AT5G15190	-1.82873	1.49295e-82	1.69245e-81
AT5G22580	AT5G22580	2.73535	2.86148e-141	5.56653e-140			AT2G45820	DBP	-1.828	0	0
AT2G24980	AT2G24980	2.73526	1.10469e-111	1.69068e-110			AT1G70581	AT1G70581	-1.82739	3.39542e-14	1.10986e-13
AT1G56710	AT1G56710	2.73492	7.10078e-127	1.23756e-125			AT4G15700	GRXS3	-1.82329	1.67529e-62	1.51343e-61
AT4G29305	LCR25	2.73322	3.32865e-05	6.78819e-05			AT2G45680	TCP9	-1.82297	5.67989e-106	8.24002e-105
AT3G28510	AT3G28510	2.72707	3.03814e-15	1.03411e-14			AT1G65800	SD16	-1.82035	1.26912e-216	3.70751e-215
AT2G28690	AT2G28690	2.72667	5.82402e-22	2.46061e-21			AT3G59930	AT3G59930	-1.81774	3.40699e-35	1.96814e-34
AT1G31320	LBD4	2.72646	2.33273e-104	3.3221e-103			AT5G59670	AT5G59670	-1.8175	3.41267e-14	1.11521e-13
AT5G07560	GRP20	2.72611	6.28427e-13	1.96154e-12			AT1G19380	AT1G19380	-1.8165	7.14239e-259	2.64816e-257
AT2G42000	AT2G42000	2.72246	1.92938e-06	4.30581e-06			AT4G22520	AT4G22520	-1.8151	5.80278e-57	4.85523e-56
AT5G55770	AT5G55770	2.7224	2.19465e-07	5.20667e-07			AT5G23480	AT5G23480	-1.81396	0.000843604	0.00152484
AT5G20790	AT5G20790	2.72235	2.3274e-62	2.09368e-61			AT5G37550	AT5G37550	-1.81298	1.33547e-07	3.21415e-07
AT5G42280	AT5G42280	2.72106	1.11858e-105	1.61544e-104			AT4G13340	LRX3	-1.81258	0	0
AT3G48770	AT3G48770	2.71776	2.30702e-31	1.22984e-30			AT5G58090	AT5G58090	-1.80891	0	0
AT4G09880	AT4G09880	2.71427	1.85977e-05	3.87345e-05			AT5G12880	AT5G12880	-1.80764	6.67232e-32	3.59732e-31
AT5G55250	IAMT1	2.70908	1.52928e-137	2.90224e-136			AT3G14440	NCED3	-1.80701	4.87962e-38	2.9794e-37
AT5G13170	SWEET15	2.70904	9.51256e-96	1.2498e-94			AT1G50732	AT1G50732	-1.80694	1.1381e-98	1.53545e-97
AT5G07310	ERF115	2.7055	1.04186e-16	3.72903e-16			AT1G30455	AT1G30455	-1.80592	0.0047446	0.00791693
AT4G25100	FSD1	2.70478	0	0			AT2G25735	AT2G25735	-1.80365	1.04822e-153	2.20668e-152
AT1G80730	ZFP1	2.70325	2.04621e-15	7.01417e-15			AT3G12775	AT3G12775	-1.80162	0.00337086	0.00572689
AT3G58060	MTPC3	2.70117	4.10903e-16	1.44193e-15			AT4G06544	AT4G06544	-1.80116	0.0071249	0.0116535
AT4G25850	ORP4B	2.70074	9.84817e-50	7.34527e-49			AT5G06870	PGIP2	-1.8003	1.96365e-246	6.76191e-245
AT1G76960	AT1G76960	2.69829	2.92444e-157	6.31739e-156			AT1G05100	MAPKKK18	-1.79857	2.72974e-09	7.21882e-09
AT4G27480	AT4G27480	2.6971	1.16283e-231	3.71004e-230			AT1G25400	AT1G25400	-1.79708	5.34966e-189	1.37333e-187
AT5G10000	FD4	2.69703	9.02357e-06	1.92125e-05			AT4G15330	CYP705A1	-1.79681	6.24228e-61	5.50714e-60
AT3G21030	AT3G21030	2.68747	6.69653e-22	2.8204e-21			AT1G58290	HEMA1	-1.79673	0	0
AT3G10590	AT3G10590	2.68591	2.91233e-11	8.49139e-11			AT4G27220	AT4G27220	-1.79667	0.00434408	0.00728421
AT3G53232	RTFL1	2.68552	6.20353e-22	2.61577e-21			AT2G48020	AT2G48020	-1.79606	1.5651e-160	3.45672e-159
AT1G16770	AT1G16770	2.6819	2.2515e-46	1.58515e-45			AT1G57943	PUP17	-1.79573	0.00379498	0.00641087
AT5G22555	AT5G22555	2.68014	1.08625e-05	2.29942e-05			AT1G01140	CIPK9	-1.79511	0	0
AT2G31425	AT2G31425	2.6795	4.46994e-05	9.02157e-05			AT1G13650	AT1G13650	-1.79494	1.94927e-30	1.01795e-29
AT1G19960	AT1G19960	2.67928	3.26454e-60	2.84675e-59			AT2G14115	AT2G14115	-1.79363	3.27851e-15	1.11459e-14
AT4G36430	PER49	2.67882	1.64284e-180	4.05488e-179			AT5G13190	AT5G13190	-1.7936	1.32914e-291	5.72312e-290
AT4G08410	AT4G08410	2.67746	1.19411e-35	6.94532e-35			AT5G18730	AT5G18730	-1.79254	0.00217233	0.00376889
AT1G01305	AT1G01305	2.67634	1.15785e-05	2.44512e-05			AT2G32660	AtRLP22	-1.79221	3.44934e-33	1.91572e-32
AT5G54585	AT5G54585	2.6748	1.82637e-26	8.67153e-26			AT1G77500	AT1G77500	-1.79082	2.07899e-135	3.87372e-134
AT4G23680	AT4G23680	2.66664	0	0			AT5G38096	AT5G38096	-1.79025	0.000428906	0.000797603
AT2G18590	AT2G18590	2.66467	2.46222e-10	6.8642e-10			AT5G40310	AT5G40310	-1.7889	0.00547192	0.00906619
AT3G46250	AT3G46250	2.66324	1.77798e-07	4.24132e-07			AT5G03390	AT5G03390	-1.7887	6.15471e-08	1.51517e-07
AT3G44290	NAC60	2.66298	1.11088e-90	1.38226e-89			AT3G59790	MPK10	-1.78761	0.00230485	0.0039872
AT4G16240	AT4G16240	2.65832	2.83683e-05	5.82415e-05			AT2G29710	UGT71D2	-1.78459	2.07457e-06	4.61937e-06
AT3G11210	CPRD49	2.65689	1.64643e-305	7.49229e-304			AT2G18800	XTH21	-1.78352	1.41936e-18	5.38567e-18
AT1G17020	SRG1	2.65269	1.86126e-281	7.72861e-280			AT5G24070	PER61	-1.77815	2.90897e-18	1.09567e-17
AT5G65100	EIL5	2.65	2.09984e-06	4.67157e-06			AT5G59730	ATEXO70H7	-1.77769	6.44127e-27	3.09442e-26
AT1G08650	PPCK1	2.64948	8.67174e-282	3.61252e-280			AT3G55040	GSTL2	-1.77568	1.80591e-275	7.22929e-274
AT2G10980	AT2G10980	2.64915	3.22142e-05	6.57893e-05			AT1G23510	AT1G23510	-1.77502	0.000369473	0.000691548
AT5G24313	AT5G24313	2.64845	1.14484e-22	4.92621e-22			AT3G14260	AT3G14260	-1.77254	3.87059e-34	2.19342e-33
AT3G14300	PME26	2.64474	5.53099e-05	0.000110888			AT1G23840	AT1G23840	-1.77167	3.887e-13	1.2237e-12
AT1G35910	TPPD	2.6441	5.10253e-53	4.03229e-52			AT1G21140	AT1G21140	-1.77167	5.38241e-20	2.13496e-19
AT5G28810	AT5G28810	2.64293	3.85296e-05	7.81637e-05			AT3G15620	UVR3	-1.77046	1.25011e-186	3.19321e-185
AT2G23960	AT2G23960	2.64242	6.35526e-17	2.29101e-16			AT1G69523	AT1G69523	-1.77045	2.83312e-79	3.10987e-78
AT2G25470	AtRLP21	2.64126	1.17457e-16	4.19701e-16			AT1G69150	AT1G69150	-1.76838	0.000383053	0.000715972
AT2G41240	BHLH100	2.63765	7.94161e-05	0.000157067			AT5G59400	AT5G59400	-1.76753	1.7761e-53	1.41184e-52
AT3G20557	AT3G20557	2.63628	9.00662e-07	2.05531e-06			AT3G16510	AT3G16510	-1.76652	1.24165e-118	2.00701e-117
AT1G53080	AT1G53080	2.63569	9.39639e-09	2.4214e-08			AT1G80610	AT1G80610	-1.76482	1.14349e-120	1.88279e-119
AT3G43190	SUS4	2.63431	7.50601e-246	2.58126e-244			AT4G02200	DI19-5	-1.76307	1.14834e-258	4.25152e-257
AT3G18715	IDL4	2.6259	4.49684e-11	1.29828e-10			AT5G67450	AZF1	-1.763	2.84298e-29	1.44461e-28
AT5G50335	AT5G50335	2.62354	7.76246e-62	6.94151e-61			AT4G12830	AT4G12830	-1.76277	3.54103e-266	1.36218e-264
AT5G64530	ANAC104	2.6225	9.29609e-37	5.51182e-36			AT4G11390	AT4G11390	-1.75499	0.00528398	0.00876955
AT2G13900	AT2G13900	2.6211	2.53834e-07	5.99817e-07			AT2G24681	REM11	-1.75407	0.00897123	0.0144719
AT1G26400	AT1G26400	2.61547	6.29556e-05	0.000125588			AT5G51190	ERF105	-1.75395	3.71154e-236	1.21754e-234
AT4G08691	AT4G08691	2.61488	6.38636e-05	0.00012731			AT5G52400	CYP715A1	-1.753	0.000104303	0.000204535
AT5G26230	MAKR1	2.61429	3.15721e-80	3.49558e-79			AT5G07880	SNAP29	-1.75266	0.00335387	0.00570067
AT2G43860	AT2G43860	2.61369	1.2986e-05	2.73423e-05			AT4G37400	CYP81F3	-1.75097	9.75125e-26	4.53983e-25
AT1G76470	AT1G76470	2.60977	1.60212e-86	1.90824e-85			AT3G56090	FER3	-1.75094	0	0
AT4G13420	POT5	2.60917	7.90414e-41	5.10343e-40			AT2G41905	AT2G41905	-1.74806	9.0588e-19	3.46501e-18
AT4G19810	AT4G19810	2.60689	2.13384e-267	8.23328e-266			AT1G62886	AT1G62886	-1.74725	0.0051822	0.00860733
AT5G42800	DFRA	2.60247	5.55316e-29	2.80228e-28			AT5G58430	EXO70B1	-1.74724	0	0
AT1G53070	AT1G53070	2.60143	1.0319e-152	2.15638e-151			AT2G25250	AT2G25250	-1.74577	0	0
AT5G57260	CYP71B10	2.59958	1.61739e-07	3.87086e-07			AT1G23850	AT1G23850	-1.74567	2.25858e-50	1.70341e-49
AT4G13210	AT4G13210	2.59882	1.21628e-63	1.11768e-62			AT3G52310	ABCG27	-1.74311	5.33696e-27	2.57017e-26
AT2G33460	RIC1	2.59784	5.60767e-23	2.43341e-22			AT4G18220	AT4G18220	-1.74238	1.27729e-60	1.12146e-59
AT5G10220	ANN6	2.59656	1.00427e-20	4.07175e-20			AT1G74110	CYP78A10	-1.74165	0.00330619	0.0056241
AT5G30500	GOLS10	2.59593	9.52748e-05	0.000187342			AT4G27520	ENODL2	-1.73899	0	0
AT3G61660	AT3G61660	2.59284	6.9335e-13	2.16103e-12			AT5G67410	AT5G67410	-1.73876	3.56687e-10	9.86326e-10
AT3G16900	AT3G16900	2.59157	2.84847e-28	1.4143e-27			AT4G20000	AT4G20000	-1.73534	2.16811e-31	1.15699e-30
AT3G57950	AT3G57950	2.59101	1.36519e-34	7.80892e-34			AT2G26610	AT2G26610	-1.73472	0.0096144	0.0154423
AT3G23950	AT3G23950	2.58763	7.9276e-05	0.000156802			AT4G26170	AT4G26170	-1.73439	0.000654556	0.00119596
AT1G29020	AT1G29020	2.58756	9.59914e-36	5.59313e-35			AT1G72940	AT1G72940	-1.73323	5.58765e-277	2.25087e-275
AT3G09400	PLL3	2.58249	2.94787e-23	1.28903e-22			AT5G36002	AT5G36002	-1.73193	5.46651e-11	1.57256e-10
AT4G01470	TIP1-3	2.57982	1.89566e-05	3.9466e-05			AT1G66860	AT1G66860	-1.72971	4.21497e-05	8.52376e-05
AT1G71890	SUC5	2.57519	7.52601e-46	5.24813e-45			AT1G64760	AT1G64760	-1.72741	1.91398e-187	4.89383e-186
AT1G07430	AIP1	2.57416	3.79472e-36	2.22728e-35			AT1G79220	AT1G79220	-1.725	3.65277e-37	2.18603e-36
AT5G15720	GLIP7	2.57247	6.44091e-24	2.86586e-23			AT1G10070	BCAT2	-1.72448	0	0
AT5G55490	GEX1	2.57086	7.72532e-79	8.4366e-78			AT3G25600	CML16	-1.72318	3.48153e-124	5.92669e-123
AT1G63410	AT1G63410	2.56998	1.46356e-08	3.73321e-08			AT5G06805	AT5G06805	-1.72312	0.0101968	0.0163379
AT2G14692	AT2G14692	2.56986	0.000104457	0.00020482			AT3G01175	AT3G01175	-1.72013	4.22124e-15	1.42958e-14
AT2G31180	ATMYB14	2.56907	4.29352e-25	1.96886e-24			AT2G24710	GLR2.3	-1.7177	0.00698816	0.0114357
AT4G01390	AT4G01390	2.56889	6.83615e-146	1.37582e-144			AT4G15680	GRXS4	-1.71721	4.87427e-44	3.29669e-43
AT4G14980	AT4G14980	2.56643	1.41361e-47	1.01704e-46			AT1G67880	AT1G67880	-1.71693	2.4259e-127	4.24242e-126
AT1G25440	COL16	2.56481	0	0			AT1G37130	NIA2	-1.71533	0	0
AT2G17850	STR17	2.56346	3.84682e-28	1.90445e-27			AT2G38600	AT2G38600	-1.71383	0.000120281	0.000234717
AT2G32100	OFP16	2.56283	8.16398e-69	7.98021e-68			AT3G28770	AT3G28770	-1.71294	4.63375e-35	2.67019e-34
AT1G21360	GLTP2	2.56168	2.79772e-143	5.52641e-142			AT4G23190	CRK11	-1.71283	1.00351e-242	3.40079e-241
AT1G22680	AT1G22680	2.56109	2.66967e-05	5.49417e-05			AT1G62480	AT1G62480	-1.71202	0	0
AT3G07540	FH10	2.5609	0	0			AT3G18777	AT3G18777	-1.71199	0.000742895	0.00135053
AT2G33690	AT2G33690	2.55903	2.43801e-05	5.03076e-05			AT5G66052	AT5G66052	-1.71171	0	0
AT5G60480	AtHB26	2.5587	9.61159e-05	0.000188943			AT3G06890	AT3G06890	-1.71094	7.51957e-32	4.049e-31
AT5G66985	AT5G66985	2.55767	1.11195e-105	1.60677e-104			AT5G37420	AT5G37420	-1.71057	0.00568794	0.00940708
AT5G63580	FLS2	2.55407	3.4361e-47	2.45422e-46			AT4G28930	AT4G28930	-1.71054	0.00030525	0.000575756
AT1G54530	AT1G54530	2.55316	4.86092e-48	3.52995e-47			AT5G10230	ANNAT7	-1.70926	3.11288e-09	8.20748e-09
AT1G22600	AT1G22600	2.55233	6.7702e-19	2.59893e-18			AT3G19030	AT3G19030	-1.70858	1.14736e-47	8.28042e-47
AT5G41030	TCP6	2.55185	2.57975e-05	5.31295e-05			AT1G49450	AT1G49450	-1.70555	4.88205e-21	1.99869e-20
AT4G02780	GA1	2.54974	5.39735e-36	3.15996e-35			AT5G60350	AT5G60350	-1.70524	0.000857961	0.00155003
AT3G25130	AT3G25130	2.54964	2.84136e-64	2.6404e-63			AT3G24540	PERK3	-1.70515	0.00251636	0.0043399
AT1G09370	AT1G09370	2.53804	6.97287e-08	1.71083e-07			AT1G29600	AT1G29600	-1.7047	3.49781e-22	1.48836e-21
AT5G09500	RPS15C	2.53584	3.73048e-09	9.80055e-09			AT5G02840	RVE4	-1.70303	0	0
AT2G32487	AT2G32487	2.53564	3.47843e-60	3.02915e-59			AT5G15130	WRKY72	-1.70193	1.73237e-112	2.66726e-111
AT5G35375	AT5G35375	2.53481	3.10285e-08	7.7799e-08			AT3G01770	GTE11	-1.70051	0	0
AT1G15580	IAA5	2.53362	6.72838e-08	1.65211e-07			AT3G26165	CYP71B18	-1.69968	2.77299e-77	2.98504e-76
AT3G26010	AT3G26010	2.53289	4.66773e-05	9.40891e-05			AT3G02880	AT3G02880	-1.69879	0	0
AT4G31330	AT4G31330	2.53197	1.91841e-85	2.25664e-84			AT1G79890	AT1G79890	-1.69853	5.95664e-15	2.00617e-14
AT5G63750	ARI13	2.53097	2.3074e-19	8.97323e-19			AT5G26270	AT5G26270	-1.698	1.15918e-50	8.77607e-50
AT4G08400	AT4G08400	2.53082	9.20928e-60	7.96562e-59			AT5G01600	FER1	-1.6968	0	0
AT3G08870	LECRK61	2.53042	4.74857e-26	2.22736e-25			AT3G21320	AT3G21320	-1.69655	1.06531e-07	2.5797e-07
AT3G14520	TPS18	2.52877	8.52946e-05	0.000168251			AT4G28005	AT4G28005	-1.69603	0.00699186	0.011441
AT3G22540	AT3G22540	2.527	3.8609e-16	1.35706e-15			AT3G50930	BCS1	-1.69509	4.51323e-212	1.29339e-210
AT3G27410	AT3G27410	2.52685	8.01069e-05	0.000158347			AT5G63790	NAC102	-1.69483	2.8416e-294	1.23812e-292
AT5G03090	AT5G03090	2.52682	2.51304e-09	6.66019e-09			AT5G24420	PGL5	-1.69408	1.29527e-72	1.32315e-71
AT5G58390	PER67	2.5216	0	0			AT1G20400	AT1G20400	-1.69257	3.03649e-05	6.21713e-05
AT2G47010	AT2G47010	2.51997	2.86414e-26	1.35137e-25			AT1G65480	FT	-1.69253	0.000122743	0.000239266
AT4G40010	SRK2F	2.51985	2.53645e-40	1.62379e-39			AT5G50750	RGP4	-1.69091	3.25406e-07	7.63663e-07
AT5G19650	OFP8	2.51942	3.79914e-10	1.04886e-09			AT2G04790	AT2G04790	-1.69071	7.42952e-64	6.85926e-63
AT1G67148	AT1G67148	2.51837	1.42147e-26	6.76662e-26			AT2G23550	MES6	-1.689	5.9001e-07	1.36414e-06
AT2G36210	AT2G36210	2.51637	9.92063e-14	3.18984e-13			AT1G72950	AT1G72950	-1.68841	3.96462e-24	1.77236e-23
AT1G05420	OFP12	2.51634	7.35205e-23	3.17692e-22			AT1G67460	AT1G67460	-1.68524	0.00947586	0.0152275
AT5G05770	WOX7	2.51432	6.34004e-05	0.000126426			AT2G28400	AT2G28400	-1.68374	6.03423e-45	4.15471e-44
AT5G64080	AT5G64080	2.51103	1.59632e-268	6.18724e-267			AT4G33985	AT4G33985	-1.68367	1.5883e-76	1.68847e-75
AT3G42820	AT3G42820	2.50969	0.000111653	0.000218313			AT5G17880	CSA1	-1.68194	1.20642e-174	2.88057e-173
AT5G15160	PRE2	2.50879	2.83616e-62	2.54867e-61			AT3G47870	LBD27	-1.68119	0.0116824	0.0185627
AT5G47330	AT5G47330	2.5086	9.33901e-164	2.10436e-162			AT3G61980	AT3G61980	-1.68083	3.08413e-122	5.14758e-121
AT5G55340	AT5	2.50521	5.72753e-20	2.26975e-19			AT3G57160	AT3G57160	-1.68082	1.83439e-16	6.52014e-16
AT4G25845	AT4G25845	2.50427	7.29698e-05	0.000144742			AT2G24600	AT2G24600	-1.6805	0	0
AT5G11930	GRXC10	2.50137	3.41495e-17	1.2433e-16			AT4G15800	RALFL33	-1.67935	2.90731e-220	8.73215e-219
AT5G58660	AT5G58660	2.49926	5.4047e-156	1.1539e-154			AT1G77760	NIA1	-1.67481	0	0
AT1G62835	AT1G62835	2.49902	8.47917e-05	0.000167324			AT4G07868	AT4G07868	-1.67406	0.0109748	0.0175066
AT1G16760	AT1G16760	2.49761	0.000207315	0.000397353			AT2G21120	AT2G21120	-1.67375	0	0
AT2G27240	ALMT7	2.49646	2.8289e-08	7.1125e-08			AT5G47710	AT5G47710	-1.673	2.4768e-86	2.94731e-85
AT4G37390	YDK1	2.49582	1.21856e-203	3.34615e-202			AT3G13850	LBD22	-1.67212	0.004621	0.00772227
AT4G34790	AT4G34790	2.49134	3.42827e-39	2.14382e-38			AT1G62320	AT1G62320	-1.66925	7.08458e-43	4.71569e-42
AT5G64552	CPuORF22	2.48872	6.04462e-116	9.56537e-115			AT5G11070	AT5G11070	-1.66753	0	0
AT5G11100	SYT4	2.48708	6.2496e-207	1.73284e-205			AT1G02670	AT1G02670	-1.66684	9.53335e-32	5.1215e-31
AT5G39110	GLP6	2.48662	5.67267e-15	1.91279e-14			AT1G53790	AT1G53790	-1.6663	4.18771e-24	1.8698e-23
AT4G08910	AT4G08910	2.48506	5.42945e-30	2.80902e-29			AT1G21090	AT1G21090	-1.66355	4.26504e-86	5.05882e-85
AT1G13448	AT1G13448	2.48118	7.73039e-14	2.49531e-13			AT5G62340	AT5G62340	-1.6629	8.2671e-45	5.6738e-44
AT4G29190	AT4G29190	2.47702	0	0			AT2G43290	CML5	-1.66272	0	0
AT5G64550	AT5G64550	2.4759	2.69984e-97	3.59698e-96			AT5G39770	AT5G39770	-1.6604	0.0130302	0.0205651
AT2G29160	AT2G29160	2.47236	4.74323e-06	1.03107e-05			AT4G17785	MYB39	-1.65968	1.41954e-05	2.98177e-05
AT2G36325	AT2G36325	2.47097	1.73322e-06	3.88667e-06			AT3G59200	AT3G59200	-1.65885	4.07637e-05	8.25391e-05
AT1G52040	MBP1	2.47066	1.2471e-125	2.15011e-124			AT5G08330	TCP21	-1.65792	1.62568e-199	4.36124e-198
AT5G49330	MYB111	2.46929	3.90422e-39	2.43669e-38			AT1G56510	WRR4	-1.65655	0	0
AT4G08620	SULTR1	2.46405	4.24385e-30	2.20141e-29			AT3G24550	PERK1	-1.65614	0	0
AT1G05490	CLSY3	2.46135	9.05004e-49	6.63601e-48			AT1G13790	FDM4	-1.65564	3.02903e-22	1.29081e-21
AT3G46900	COPT2	2.46021	3.19569e-06	7.01754e-06			AT5G59080	AT5G59080	-1.6546	3.80076e-85	4.45451e-84
AT5G10040	AT5G10040	2.45968	7.75013e-11	2.21432e-10			AT5G60610	AT5G60610	-1.65457	1.34621e-07	3.23879e-07
AT2G02120	PDF2.1	2.45934	0	0			AT1G06830	GRXS11	-1.65167	3.95352e-43	2.64118e-42
AT3G09290	TAC1	2.45912	5.85438e-09	1.52351e-08			AT1G66400	CML23	-1.6514	1.54256e-89	1.89002e-88
AT5G14340	AtMYB40	2.45888	3.58765e-28	1.77718e-27			AT2G37180	PIP2-3	-1.65056	4.50736e-120	7.37882e-119
AT3G05630	PLDP2	2.45866	0	0			AT2G19803	AT2G19803	-1.6473	0.014114	0.0221583
AT1G30660	T5I8.11	2.45794	2.28817e-31	1.2203e-30			AT5G49740	FRO7	-1.64622	2.6432e-139	5.0612e-138
AT5G13790	AGL15	2.45791	7.31607e-232	2.34297e-230			AT4G23215	AT4G23215	-1.6456	4.34584e-14	1.41457e-13
AT4G10370	AT4G10370	2.45786	8.40938e-40	5.32365e-39			AT3G28210	SAP12	-1.64429	9.96514e-18	3.69849e-17
AT4G10265	AT4G10265	2.45695	1.36478e-07	3.28192e-07			AT5G28630	AT5G28630	-1.64131	8.17434e-18	3.04046e-17
AT4G12940	AT4G12940	2.45525	0.00020366	0.00039061			AT1G11050	AT1G11050	-1.63975	2.59261e-280	1.06789e-278
AT5G15120	PCO1	2.45439	5.49808e-131	9.83665e-130			AT5G66620	DAR6	-1.63958	1.21535e-34	6.9627e-34
AT1G59790	AT1G59790	2.45406	3.55438e-05	7.22839e-05			AT1G06002	AT1G06002	-1.63946	0.0124257	0.0196717
AT5G44400	AT5G44400	2.45332	1.3327e-142	2.62041e-141			AT5G44050	AT5G44050	-1.63915	2.71256e-21	1.11964e-20
AT3G49960	PER35	2.45205	7.49781e-159	1.64043e-157			AT3G18550	TCP18	-1.63768	0.0113959	0.0181332
AT2G13431	AT2G13431	2.44713	1.3866e-17	5.124e-17			AT2G29480	GSTU2	-1.63738	1.75098e-19	6.83738e-19
AT3G51171	AT3G51171	2.44651	2.72624e-05	5.60609e-05			AT5G24410	PGL4	-1.6327	2.44301e-24	1.09865e-23
AT5G14860	AT5G14860	2.44454	3.18748e-13	1.00657e-12			AT2G14960	GH3.1	-1.63268	2.09811e-14	6.92521e-14
AT4G16370	ATOPT3	2.44317	0	0			AT3G15200	AT3G15200	-1.63216	3.5303e-26	1.6617e-25
AT1G63960	AT1G63960	2.4425	0.000171834	0.000331604			AT3G16020	AT3G16020	-1.63211	0.00682533	0.0111853
AT3G32040	AT3G32040	2.43488	4.34067e-21	1.78132e-20			AT2G32130	AT2G32130	-1.63072	0.00536121	0.00889369
AT1G19320	AT1G19320	2.43372	2.09469e-14	6.91573e-14			AT5G57100	AT5G57100	-1.63053	3.04383e-157	6.56423e-156
AT4G31630	REM4	2.43239	0.000121645	0.000237252			AT3G13275	AT3G13275	-1.62899	4.33532e-28	2.14298e-27
AT5G64210	AOX2	2.42559	3.83393e-10	1.05824e-09			AT5G50915	BHLH137	-1.62867	1.0759e-30	5.64271e-30
AT4G11650	OSM34	2.42351	0	0			AT1G35240	ARF20	-1.62662	7.57293e-06	1.6225e-05
AT1G66360	AT1G66360	2.42259	7.65993e-05	0.00015166			AT4G16880	AT4G16880	-1.62583	7.55537e-30	3.89161e-29
AT1G55050	AT1G55050	2.41852	1.65669e-58	1.41152e-57			AT5G03720	HSFA3	-1.62438	9.67998e-62	8.6502e-61
AT4G27190	AT4G27190	2.41494	2.43835e-05	5.03106e-05			AT1G16150	WAKL4	-1.6231	0.015243	0.02383
AT3G59220	PRN1	2.4142	1.24721e-203	3.42115e-202			AT4G22610	AT4G22610	-1.62306	3.90223e-78	4.23444e-77
AT2G31160	LSH3	2.41349	1.38424e-60	1.21452e-59			AT1G50970	AT1G50970	-1.62304	1.01486e-65	9.60857e-65
AT4G29150	IQD25	2.41253	2.96309e-34	1.6825e-33			AT5G39020	AT5G39020	-1.62291	1.61403e-39	1.01726e-38
AT1G62530	AT1G62530	2.41224	6.36414e-06	1.37051e-05			AT2G20350	ERF120	-1.62266	0.0102184	0.0163714
AT1G11785	AT1G11785	2.41137	8.97453e-08	2.18396e-07			AT2G46770	NAC043	-1.62204	0.0158991	0.0248042
AT3G47190	AT3G47190	2.40922	3.25783e-05	6.65118e-05			AT1G30360	ERD4	-1.62199	0	0
AT1G24520	BCP1	2.40832	2.42746e-06	5.37943e-06			AT4G09030	AGP10	-1.62147	6.53546e-77	6.99117e-76
AT1G79320	AMC6	2.4079	5.90239e-36	3.45328e-35			AT2G01918	PQL3	-1.61959	3.3227e-31	1.76394e-30
AT4G21366	AT4G21366	2.40615	0.000138133	0.000268332			AT5G22530	AT5G22530	-1.61905	5.8227e-07	1.34673e-06
AT1G75590	AT1G75590	2.40546	1.2231e-15	4.22488e-15			AT1G03020	GRXS1	-1.6182	2.025e-06	4.51213e-06
AT5G49120	AT5G49120	2.40387	1.11206e-10	3.14853e-10			AT1G56140	AT1G56140	-1.61734	0	0
AT1G26240	AT1G26240	2.40113	0.000102347	0.000200838			AT1G22690	GASA9	-1.61728	0	0
AT3G58410	AT3G58410	2.39878	2.8285e-05	5.80797e-05			AT3G46930	AT3G46930	-1.6167	2.54998e-157	5.51313e-156
AT1G60110	JAL17	2.39702	1.82911e-05	3.81207e-05			AT3G10280	KCS14	-1.61653	1.94505e-13	6.19187e-13
AT1G08170	AT1G08170	2.39701	2.49262e-05	5.14137e-05			AT4G18197	PUP7	-1.61549	1.92884e-183	4.84479e-182
AT3G14320	ATL61	2.39607	2.12739e-05	4.41291e-05			AT1G72060	AT1G72060	-1.6127	6.43423e-31	3.39187e-30
AT1G29195	AT1G29195	2.39537	4.24646e-43	2.83614e-42			AT3G50800	AT3G50800	-1.61136	3.87476e-34	2.1953e-33
AT1G52700	AT1G52700	2.39467	4.24061e-37	2.5325e-36			AT3G55630	FPGS3	-1.61026	1.30337e-229	4.11744e-228
AT1G78170	AT1G78170	2.39449	4.98165e-206	1.37829e-204			AT1G66910	AT1G66910	-1.60984	6.89147e-97	9.1198e-96
AT4G30540	AT4G30540	2.39433	5.91378e-05	0.000118174			AT5G13100	AT5G13100	-1.60879	1.96124e-243	6.68178e-242
AT4G39610	AT4G39610	2.39421	2.58272e-07	6.09574e-07			AT4G37260	MYB73	-1.60679	0	0
AT5G17800	AtMYB56	2.39347	6.45754e-48	4.67747e-47			AT5G01712	CPuORF48	-1.60555	6.67764e-15	2.2428e-14
AT3G59940	SKIP20	2.39277	0	0			AT1G05660	AT1G05660	-1.60491	1.17928e-12	3.64101e-12
AT1G73610	AT1G73610	2.39267	5.89797e-05	0.000117886			AT1G24170	GATL8	-1.60358	4.25335e-294	1.8501e-292
AT4G00870	BHLH14	2.38741	4.91949e-09	1.28478e-08			AT3G28270	AT3G28270	-1.60321	1.56411e-42	1.0352e-41
AT1G75600	AT1G75600	2.38583	1.48e-05	3.10444e-05			AT5G24750	AT5G24750	-1.59928	1.79488e-29	9.15666e-29
AT5G41900	AT5G41900	2.38501	1.90087e-99	2.58906e-98			AT1G72900	AT1G72900	-1.59013	9.78589e-158	2.1247e-156
AT1G35310	MLP168	2.38171	7.34596e-28	3.61027e-27			AT4G22214	AT4G22214	-1.58999	9.32596e-11	2.65214e-10
AT2G46880	PAP14	2.38151	2.69823e-26	1.27379e-25			AT3G57645	U2.2	-1.58926	0.0180791	0.0280058
AT5G44700	GSO2	2.38108	1.3974e-110	2.11717e-109			AT5G38230	AT5G38230	-1.58918	0.0145697	0.0228331
AT3G61460	BRH1	2.38106	0	0			AT2G18620	AT2G18620	-1.58854	2.21556e-08	5.60343e-08
AT2G05300	AT2G05300	2.37937	1.50226e-93	1.93212e-92			AT1G51700	DOF1.7	-1.58821	1.20909e-77	1.30484e-76
AT5G35190	AT5G35190	2.37859	9.50713e-67	9.09872e-66			AT3G45640	MPK3	-1.58799	0	0
AT3G48300	CYP71A23	2.37596	6.25358e-12	1.87673e-11			AT3G15760	AT3G15760	-1.58584	9.89174e-43	6.57056e-42
AT1G07885	AT1G07885	2.37433	0.000225399	0.000430371			AT5G06740	LECRKS5	-1.58555	3.00453e-34	1.70528e-33
AT3G21890	AT3G21890	2.37207	4.61314e-05	9.3018e-05			AT1G68620	CXE6	-1.58524	5.96401e-46	4.16684e-45
AT2G42430	LBD16	2.3704	1.49639e-44	1.02206e-43			AT2G12170	AT2G12170	-1.58429	1.85871e-11	5.46604e-11
AT4G35010	BGAL11	2.36802	0.000221208	0.000422622			AT4G03220	AT4G03220	-1.58426	0.0157688	0.0246129
AT1G24540	CYP86C1	2.36778	5.51971e-05	0.000110671			AT2G31082	CLE7	-1.58322	0.00617393	0.0101728
AT2G31230	ERF15	2.36762	3.69811e-43	2.47184e-42			AT5G62730	NPF4.7	-1.58242	2.20949e-06	4.9087e-06
AT3G50390	AT3G50390	2.36277	6.57637e-09	1.70723e-08			AT3G59250	AT3G59250	-1.5807	1.58267e-11	4.66606e-11
AT2G43660	AT2G43660	2.36238	1.37825e-08	3.52193e-08			AT2G28105	AT2G28105	-1.57909	5.42158e-14	1.75801e-13
AT1G79760	DTA4	2.36223	1.84639e-31	9.87157e-31			AT1G22550	NPF5.16	-1.57908	2.64783e-63	2.42797e-62
AT5G37450	AT5G37450	2.35781	5.17573e-07	1.20132e-06			AT1G77525	AT1G77525	-1.57886	0.0074225	0.0121163
AT2G42800	AtRLP29	2.35665	1.50877e-43	1.01483e-42			AT4G21570	AT4G21570	-1.5783	0	0
AT3G16670	AT3G16670	2.35654	0	0			AT3G11820	SYP121	-1.57659	0	0
AT1G09350	GOLS3	2.35352	0.000107272	0.000210098			AT2G34510	AT2G34510	-1.57601	0	0
AT1G01390	UGT72B2	2.35283	1.49793e-36	8.84671e-36			AT3G51325	AT3G51325	-1.57227	4.56679e-06	9.9364e-06
AT5G33390	AT5G33390	2.35195	0.000321489	0.000604961			AT2G19060	AT2G19060	-1.57224	1.56468e-06	3.5161e-06
AT4G17670	AT4G17670	2.34731	4.69992e-120	7.68914e-119			AT1G67980	CCOAMT	-1.57144	3.44238e-21	1.41836e-20
AT1G02450	NIMIN-1	2.34731	0.000162114	0.000313485			AT4G24110	AT4G24110	-1.57103	5.27036e-76	5.55666e-75
AT3G29410	TPS25	2.34699	5.88771e-45	4.05492e-44			AT5G02160	AT5G02160	-1.5692	0	0
AT3G53690	AT3G53690	2.34416	1.12386e-39	7.09722e-39			AT5G64890	PEP2	-1.5691	5.63416e-06	1.21784e-05
AT5G23230	NIC2	2.34368	1.71203e-28	8.55347e-28			AT4G15670	GRXS7	-1.56816	3.17998e-19	1.23273e-18
AT2G16890	UGT90A1	2.33815	2.09155e-101	2.89808e-100			AT3G61330	AT3G61330	-1.56799	8.75271e-09	2.25825e-08
AT2G18193	AT2G18193	2.33579	4.85194e-272	1.91241e-270			AT2G21500	AT2G21500	-1.56798	8.86364e-213	2.5544e-211
AT5G50800	SWEET13	2.32731	3.22895e-12	9.8179e-12			AT2G28305	LOG1	-1.56737	1.49839e-82	1.69786e-81
AT3G52270	AT3G52270	2.32405	3.76116e-07	8.78965e-07			AT2G47370	AT2G47370	-1.56668	3.06725e-12	9.33845e-12
AT1G30190	AT1G30190	2.32385	6.37357e-11	1.82754e-10			AT1G22190	RAP2-13	-1.56547	1.635e-165	3.72343e-164
AT3G21950	AT3G21950	2.32188	4.18126e-24	1.86725e-23			AT5G08240	AT5G08240	-1.5651	1.15549e-220	3.47461e-219
AT3G50940	AT3G50940	2.32093	4.12481e-21	1.69382e-20			AT4G22517	AT4G22517	-1.56502	3.06636e-42	2.02422e-41
AT5G22930	AT5G22930	2.32065	8.34323e-66	7.90801e-65			AT1G31130	AT1G31130	-1.561	3.6181e-240	1.21171e-238
AT4G02160	AT4G02160	2.31988	7.09004e-05	0.000140757			AT3G44560	FAR8	-1.56056	0.0199529	0.0307059
AT3G28899	AT3G28899	2.31766	7.01387e-06	1.50637e-05			AT3G16690	SWEET16	-1.55871	1.54835e-72	1.57854e-71
AT1G24000	AT1G24000	2.31494	0.000173788	0.000335225			AT5G14120	AT5G14120	-1.55835	0	0
AT3G50440	ATMES10	2.31053	0	0			AT4G11050	AtGH9C3	-1.55777	0.00309139	0.00528009
AT5G63180	AT5G63180	2.30966	1.26236e-233	4.08872e-232			AT5G16830	SYP21	-1.55768	0	0
AT4G33040	GRXC6	2.30958	1.01903e-88	1.2385e-87			AT4G21970	AT4G21970	-1.55743	0.000245311	0.000466859
AT5G15830	AtbZIP3	2.30893	2.12803e-62	1.91635e-61			AT1G30820	AT1G30820	-1.55451	1.37565e-279	5.63007e-278
AT5G09470	PUMP6	2.30879	3.84874e-06	8.4012e-06			AT5G13650	AT5G13650	-1.55207	0	0
AT1G66020	TPS26	2.30768	3.25592e-17	1.18641e-16			AT5G10210	AT5G10210	-1.55135	4.03544e-38	2.46985e-37
AT1G20180	AT1G20180	2.30654	3.78527e-06	8.26476e-06			AT1G54310	AT1G54310	-1.54992	1.00262e-81	1.12416e-80
AT4G37800	XTH7	2.30519	0	0			AT3G03480	CHAT	-1.54985	3.96269e-16	1.39188e-15
AT5G61290	AT5G61290	2.30498	1.50035e-58	1.28002e-57			AT5G25910	AtRLP52	-1.5497	6.0707e-25	2.77388e-24
AT5G24280	GMI1	2.30287	0	0			AT3G46400	AT3G46400	-1.5495	0.00646523	0.0106213
AT1G11700	AT1G11700	2.30194	1.1954e-115	1.88585e-114			AT3G59700	LECRK55	-1.54812	1.78862e-52	1.39752e-51
AT3G10120	AT3G10120	2.30099	5.31622e-117	8.47552e-116			AT1G64065	AT1G64065	-1.54778	5.7616e-69	5.64483e-68
AT5G27910	NFYC8	2.30012	0.000594298	0.00109076			AT3G06500	INVC	-1.54727	0	0
AT3G54590	ATHRGP1	2.29883	2.48877e-69	2.45523e-68			AT1G19050	ARR7	-1.54628	5.12277e-86	6.07055e-85
AT3G50890	ZHD7	2.29634	2.2103e-43	1.48318e-42			AT3G26813	MIR169J	-1.54613	0.00332793	0.00565808
AT5G39720	AIG2L	2.29377	1.29766e-29	6.64657e-29			AT5G12270	AT5G12270	-1.5441	1.33086e-05	2.80008e-05
AT3G57240	BG3	2.29304	8.28738e-26	3.86604e-25			AT4G24160	AT4G24160	-1.54179	0	0
AT3G12890	ASML2	2.29132	6.66822e-12	1.99906e-11			AT1G79680	WAKL10	-1.54025	3.81913e-24	1.70821e-23
AT3G47740	ABCA3	2.29085	5.44727e-18	2.03676e-17			AT1G16910	LSH8	-1.54002	0.0221863	0.0339372
AT4G14060	AT4G14060	2.29076	1.11303e-67	1.07567e-66			AT2G40711	AT2G40711	-1.53592	3.57948e-05	7.27828e-05
AT2G19320	AT2G19320	2.29043	0.000603268	0.00110619			AT1G27080	NPF2.12	-1.53487	0.0199394	0.0306908
AT1G16850	AT1G16850	2.28985	8.69586e-102	1.21212e-100			AT5G37460	AT5G37460	-1.53444	0.0214184	0.032841
AT1G13245	RTFL17	2.28955	7.4823e-292	3.23266e-290			AT4G23610	AT4G23610	-1.53364	0.000133436	0.000259557
AT5G56840	AT5G56840	2.28931	1.36564e-30	7.15493e-30			AT1G16140	WAKL3	-1.53323	0.000388754	0.00072615
AT3G17600	IAA31	2.28833	7.06491e-11	2.02103e-10			AT2G39518	AT2G39518	-1.53293	1.45301e-24	6.57241e-24
AT3G05660	AtRLP33	2.28773	3.93019e-43	2.62628e-42			AT3G45280	SYP72	-1.53277	0.0128867	0.0203487
AT1G17700	PRA1F1	2.28737	2.10636e-31	1.1245e-30			AT1G66650	AT1G66650	-1.53167	3.47616e-06	7.61646e-06
AT5G43935	FLS6	2.28698	0.000631876	0.00115658			AT3G53400	AT3G53400	-1.53056	0.0231138	0.035259
AT1G20070	AT1G20070	2.28587	2.58336e-143	5.10692e-142			AT2G40270	AT2G40270	-1.53015	2.85223e-196	7.53342e-195
AT5G20810	AT5G20810	2.2848	5.5365e-19	2.13237e-18			AT5G14070	GRXC8	-1.52995	6.75638e-09	1.7529e-08
AT1G26560	BGLU40	2.28411	1.46029e-239	4.87143e-238			AT5G05140	MED26B	-1.5295	0	0
AT1G17710	AT1G17710	2.28283	4.32065e-30	2.24079e-29			AT4G37409	AT4G37409	-1.52712	0.0233945	0.0356536
AT1G67760	AT1G67760	2.28175	2.19688e-17	8.05784e-17			AT3G27940	LBD26	-1.52709	8.77767e-09	2.26446e-08
AT2G42040	AT2G42040	2.28125	3.74585e-260	1.39692e-258			AT1G16260	WAKL8	-1.52479	1.2576e-58	1.07471e-57
AT1G74940	AT1G74940	2.27993	2.60581e-290	1.1164e-288			AT1G71250	AT1G71250	-1.52424	0.0021487	0.0037299
AT2G42660	AT2G42660	2.27984	9.30563e-61	8.18998e-60			AT5G03377	AT5G03377	-1.52321	0.0123156	0.0195047
AT3G20180	AT3G20180	2.27965	9.08141e-05	0.000178877			AT1G74430	MYB95	-1.52277	9.85901e-61	8.66808e-60
AT4G31650	REM6	2.27949	2.44724e-221	7.38496e-220			AT4G29690	AT4G29690	-1.52152	1.24066e-60	1.08967e-59
AT3G13610	F6'H1	2.27803	1.83286e-156	3.92954e-155			AT5G06865	AT5G06865	-1.52097	0.00778578	0.0126794
AT1G54160	NFYA5	2.27772	1.74893e-164	3.96527e-163			AT4G09432	AT4G09432	-1.51991	4.90953e-16	1.71787e-15
AT2G32790	AT2G32790	2.27764	1.62495e-10	4.56384e-10			AT3G52430	PAD4	-1.51927	1.18049e-84	1.37912e-83
AT4G26950	AT4G26950	2.27478	4.60799e-07	1.07227e-06			AT2G47060	AT2G47060	-1.5185	0	0
AT2G40900	AT2G40900	2.27418	5.41215e-116	8.56979e-115			AT3G18690	MKS1	-1.51798	2.82004e-80	3.12362e-79
AT1G68880	AtbZIP	2.26986	3.97481e-42	2.61651e-41			AT4G01780	AT4G01780	-1.51758	0.0180896	0.0280202
AT5G59220	HAI1	2.26791	3.52337e-124	5.99395e-123			AT2G22980	SCPL13	-1.51749	0	0
AT5G51810	GA20OX2	2.26747	2.69256e-25	1.24004e-24			AT3G08750	AT3G08750	-1.51736	0.017254	0.0267891
AT2G21220	AT2G21220	2.26695	1.39021e-17	5.13659e-17			AT1G70790	AT1G70790	-1.51611	5.05944e-75	5.2778e-74
AT1G64625	BHLH157	2.26646	8.61461e-21	3.50105e-20			AT1G15050	IAA34	-1.51466	0.000371281	0.000694677
AT1G61255	AT1G61255	2.26617	3.78156e-16	1.33009e-15			AT3G15518	AT3G15518	-1.51403	3.70281e-10	1.02315e-09
AT3G29635	AT3G29635	2.26542	6.22127e-06	1.34076e-05			AT1G62670	RPF2	-1.51399	1.69285e-19	6.6114e-19
AT2G23170	GH3.3	2.26484	0	0			AT1G72920	AT1G72920	-1.51374	1.38964e-77	1.49779e-76
AT1G18970	GLP1	2.26449	7.98765e-25	3.63875e-24			AT1G30730	AT1G30730	-1.51186	5.30834e-110	8.01885e-109
AT2G46690	SAUR32	2.26365	1.31082e-307	5.99698e-306			AT1G69020	AT1G69020	-1.51173	1.56677e-33	8.76624e-33
AT4G37970	CAD6	2.2632	2.33579e-29	1.18925e-28			AT5G06820	SRF2	-1.51117	2.2446e-08	5.67407e-08
AT1G22065	AT1G22065	2.26271	3.14691e-113	4.87447e-112			AT3G43670	AT3G43670	-1.50928	4.90785e-128	8.60049e-127
AT1G54970	PRP1	2.26098	6.44287e-145	1.28857e-143			AT4G02130	GATL6	-1.50826	2.5587e-106	3.73101e-105
AT5G48850	SDI1	2.25469	1.00368e-83	1.15362e-82			AT5G45040	PETJ	-1.50802	3.54703e-111	5.406e-110
AT3G27480	AT3G27480	2.25426	1.19982e-22	5.16106e-22			AT1G33540	scpl18	-1.50351	1.43552e-06	3.23351e-06
AT1G64110	AT1G64110	2.25381	0	0			AT5G03360	AT5G03360	-1.49909	1.83654e-37	1.10633e-36
AT3G22121	AT3G22121	2.25319	1.4178e-05	2.97836e-05			AT4G03930	PME42	-1.49855	0.000252235	0.000479361
AT1G22380	UGT85A3	2.2525	3.51887e-56	2.91475e-55			AT4G28800	BHLH56	-1.49804	0.0233651	0.0356149
AT4G18630	AT4G18630	2.25236	9.08363e-45	6.22919e-44			AT2G23400	AT2G23400	-1.49772	0.000930345	0.0016749
AT5G09976	AT5G09976	2.25226	2.54555e-05	5.24546e-05			AT5G47070	AT5G47070	-1.49463	1.30935e-116	2.08228e-115
AT1G13430	STO9	2.25166	6.39787e-30	3.30337e-29			AT1G56165	AT1G56165	-1.49451	9.29799e-08	2.26053e-07
AT3G58270	AT3G58270	2.24985	7.50414e-113	1.15887e-111			AT3G29633	AT3G29633	-1.4945	0.02402	0.0365587
AT3G15310	AT3G15310	2.24959	0.000460094	0.000852569			AT3G29190	TPS15	-1.49422	0.0184978	0.028618
AT5G59370	ACT4	2.24299	5.44322e-06	1.17823e-05			AT1G28600	AT1G28600	-1.49295	3.141e-223	9.60291e-222
AT5G45990	AT5G45990	2.24288	2.16505e-39	1.35952e-38			AT1G49840	AT1G49840	-1.49272	1.3089e-95	1.71617e-94
AT3G59010	PME35	2.23886	2.7827e-37	1.66962e-36			AT2G34224	AT2G34224	-1.49239	0.0221434	0.0338817
AT3G61030	AT3G61030	2.23773	4.23839e-05	8.56841e-05			AT1G53350	RPP8L2	-1.49218	1.81679e-44	1.23793e-43
AT5G42840	AT5G42840	2.23571	3.41081e-25	1.56744e-24			AT3G57586	AT3G57586	-1.49071	2.5481e-05	5.25031e-05
AT3G27650	LBD25	2.23539	1.81193e-66	1.72635e-65			AT1G78540	SHB	-1.48858	4.5896e-52	3.55889e-51
AT3G48850	MPT2	2.23487	4.64889e-07	1.08129e-06			AT2G38210	PDX1L4	-1.48734	3.49336e-117	5.59025e-116
AT1G69530	EXPA1	2.23404	0	0			AT3G59480	AT3G59480	-1.48731	5.54145e-24	2.46822e-23
AT1G07490	RTFL3	2.23193	3.16987e-09	8.35686e-09			AT3G30763	AT3G30763	-1.48677	0.0191911	0.0296243
AT1G77960	AT1G77960	2.23161	1.98229e-12	6.07564e-12			AT2G23945	AT2G23945	-1.48635	0.00318402	0.00542889
AT2G19610	AT2G19610	2.23082	1.33125e-07	3.2043e-07			AT1G30520	AAE14	-1.48558	1.59679e-175	3.82692e-174
AT2G26870	NPC2	2.22899	8.42814e-219	2.5108e-217			AT2G23120	AT2G23120	-1.48321	1.80718e-291	7.76843e-290
AT2G16730	BGAL13	2.22784	0.000810127	0.00146713			AT1G66173	AT1G66173	-1.48183	8.68314e-08	2.11446e-07
AT1G34510	PER8	2.22781	3.58266e-86	4.25929e-85			AT4G24015	RHA4A	-1.48139	1.94896e-38	1.19943e-37
AT1G04645	AT1G04645	2.22724	0.000510925	0.000942534			AT3G18330	AT3G18330	-1.481	0.0277166	0.041746
AT4G15390	AT4G15390	2.22527	0	0			AT4G01895	AT4G01895	-1.48061	1.43599e-05	3.01558e-05
AT3G15370	EXPA12	2.22432	7.42216e-12	2.22222e-11			AT1G61820	BGLU46	-1.47973	1.98508e-184	5.0205e-183
AT1G04778	AT1G04778	2.22377	3.5186e-06	7.70549e-06			AT3G59720	AT3G59720	-1.47876	0.000571365	0.00105048
AT5G19970	AT5G19970	2.22375	4.65686e-24	2.07855e-23			AT3G57640	AT3G57640	-1.47843	5.01363e-45	3.45572e-44
AT2G18190	AT2G18190	2.22282	5.26903e-07	1.22198e-06			AT3G61400	AT3G61400	-1.47831	0.000235507	0.000448935
AT2G07080	AT2G07080	2.22244	0.000139198	0.000270334			AT5G03545	AT4	-1.47801	2.46076e-210	6.98168e-209
AT2G43000	JUB1	2.221	1.16254e-29	5.96161e-29			AT4G18205	PUP21	-1.47782	0	0
AT4G28850	XTH26	2.22074	4.69989e-47	3.35314e-46			AT2G19800	MIOX2	-1.47778	0	0
AT3G02670	AT3G02670	2.22069	4.75984e-06	1.0345e-05			AT2G27660	AT2G27660	-1.47748	2.08457e-49	1.54802e-48
AT4G16260	AT4G16260	2.22033	0	0			AT5G64450	AT5G64450	-1.47655	6.28654e-10	1.71762e-09
AT3G04181	AT3G04181	2.22006	5.88105e-15	1.98149e-14			AT1G70030	AT1G70030	-1.47589	0.0193278	0.0298193
AT5G38000	AT5G38000	2.21926	5.15994e-11	1.4852e-10			AT1G66060	AT1G66060	-1.47586	0.000387622	0.000724194
AT2G37640	EXPA3	2.21902	0	0			AT3G46700	UGT76E3	-1.47433	1.58499e-83	1.81851e-82
AT4G16620	AT4G16620	2.21679	6.64913e-47	4.73328e-46			AT5G04980	AT5G04980	-1.47423	1.98875e-36	1.17212e-35
AT2G19810	AT2G19810	2.21661	0	0			AT2G30470	VAL1	-1.47223	1.69854e-120	2.79131e-119
AT2G40200	BHLH51	2.21622	6.06484e-17	2.18754e-16			AT4G38420	sks9	-1.4712	0	0
AT5G25550	LRX7	2.21396	0.000480026	0.000887576			AT2G27630	AT2G27630	-1.47092	0.00202321	0.003524
AT2G40030	NRPE1	2.21357	0	0			AT2G30500	NET4B	-1.47085	0	0
AT2G16367	AT2G16367	2.21093	6.72964e-05	0.000133913			AT5G18360	AT5G18360	-1.47008	2.77961e-26	1.31197e-25
AT3G22550	AT3G22550	2.20992	1.90469e-156	4.08011e-155			AT5G13930	CHS	-1.46995	1.25205e-173	2.97288e-172
AT4G00910	ALMT10	2.20992	8.60763e-19	3.2949e-18			AT4G32205	AT4G32205	-1.46994	0.0110362	0.0175947
AT2G44990	CCD7	2.20796	0.000673808	0.00122999			AT5G35380	AT5G35380	-1.4695	0.0264093	0.0399248
AT1G23110	AT1G23110	2.20236	7.74145e-23	3.34236e-22			AT2G37830	AT2G37830	-1.46917	0.0265945	0.0401787
AT3G29370	AT3G29370	2.20143	5.43499e-25	2.48651e-24			AT2G42005	AT2G42005	-1.46902	0.0287298	0.043173
AT3G45180	AT3G45180	2.20083	0.00066031	0.00120613			AT4G35783	RTFL6	-1.46888	0.0008322	0.00150519
AT3G19500	BHLH113	2.20011	2.96894e-26	1.40056e-25			AT1G29340	PUB17	-1.46847	0	0
AT3G10200	AT3G10200	2.19997	6.90213e-176	1.65884e-174			AT5G18150	AT5G18150	-1.46829	2.46023e-100	3.3815e-99
AT5G21130	AT5G21130	2.19651	8.55223e-05	0.000168662			AT2G11290	AT2G11290	-1.46777	0.0291681	0.0437598
AT3G36659	AT3G36659	2.19591	1.64242e-05	3.43445e-05			AT4G14370	AT4G14370	-1.46745	1.61892e-87	1.94818e-86
AT2G03130	AT2G03130	2.19481	0.00106778	0.00191143			AT1G19750	AT1G19750	-1.46733	1.45061e-08	3.70165e-08
AT1G22110	AT1G22110	2.19409	4.15169e-23	1.80833e-22			AT2G33790	AGP30	-1.46726	1.21691e-31	6.5238e-31
AT1G24370	AT1G24370	2.19182	0.00103477	0.00185442			AT3G50290	AT3G50290	-1.46723	0.000990045	0.00177825
AT5G61090	AT5G61090	2.19088	0.0005932	0.00108882			AT5G45870	PYL12	-1.46631	0.0292836	0.0439151
AT2G28610	WOX3	2.19081	2.35617e-09	6.25415e-09			AT5G22630	ADT5	-1.466	1.0938e-197	2.913e-196
AT4G23720	AT4G23720	2.18897	2.7491e-15	9.37342e-15			AT1G61750	CRRSP1	-1.46584	6.46802e-08	1.59001e-07
AT4G22110	AT4G22110	2.18888	1.95977e-17	7.20054e-17			AT3G13270	AT3G13270	-1.46403	3.47709e-09	9.14703e-09
AT2G24762	GDU4	2.18619	5.43565e-78	5.88594e-77			AT3G14025	AT3G14025	-1.46349	0.0283129	0.042584
AT5G03495	AT5G03495	2.18461	2.7954e-46	1.96591e-45			AT5G45840	AT5G45840	-1.46245	6.63662e-51	5.04691e-50
AT1G71690	AT1G71690	2.18446	0.0011171	0.00199625			AT1G34420	AT1G34420	-1.46142	1.17709e-34	6.74502e-34
AT1G06225	CLE3	2.18042	0.00102953	0.00184606			AT4G18960	AG	-1.45953	0.0266089	0.0401981
AT1G48100	AT1G48100	2.17974	4.36345e-34	2.4689e-33			AT1G21528	AT1G21528	-1.45886	0.000827971	0.00149785
AT3G03910	GSH3	2.17936	3.57341e-08	8.92655e-08			AT1G18750	AGL65	-1.45721	9.06886e-28	4.44678e-27
AT1G36940	AT1G36940	2.17899	1.00933e-32	5.55511e-32			AT2G32200	AT2G32200	-1.45719	1.2846e-24	5.82093e-24
AT2G25510	AT2G25510	2.17628	0	0			AT3G31993	AT3G31993	-1.4566	0.0274836	0.0414316
AT2G18500	OFP7	2.17442	1.8591e-38	1.14523e-37			AT2G34910	AT2G34910	-1.45652	7.53936e-16	2.62123e-15
AT1G79250	AGC1-7	2.17358	3.66052e-08	9.13437e-08			AT1G14550	PER5	-1.45555	0.00834331	0.0135228
AT3G58400	AT3G58400	2.17317	0.000185632	0.000357023			AT3G24065	AT3G24065	-1.45552	0.0304309	0.0455264
AT5G65070	MAF4	2.16889	4.41768e-55	3.59762e-54			AT3G24060	AT3G24060	-1.4547	0.0264672	0.0400029
AT4G09530	AT4G09530	2.16842	0.0012197	0.00217323			AT3G11150	AT3G11150	-1.45397	7.31544e-08	1.79179e-07
AT2G44910	ATHB-4	2.16759	4.34901e-28	2.14934e-27			AT2G22990	SCPL8	-1.4521	0	0
AT5G44255	AT5G44255	2.16683	0.000880186	0.0015885			AT4G04840	MSRB6	-1.45208	3.46558e-63	3.16761e-62
AT2G03720	MRH6	2.16431	6.9237e-39	4.29816e-38			AT5G33399	AT5G33399	-1.45204	0.0200577	0.0308543
AT4G14723	EPFL4	2.16256	5.94555e-23	2.57698e-22			AT5G52790	CBSDUF5	-1.45013	3.11661e-20	1.24567e-19
AT1G18835	MIF3	2.16239	5.22899e-09	1.36381e-08			AT3G06490	MYB108	-1.44976	6.2695e-14	2.0304e-13
AT3G06545	AT3G06545	2.1613	0.00125801	0.00223946			AT2G17330	CYP51G2	-1.44902	2.68138e-05	5.51738e-05
AT4G23600	CORI3	2.16029	8.39327e-169	1.94602e-167			AT2G22790	AT2G22790	-1.44813	1.30036e-17	4.8067e-17
AT5G45850	AT5G45850	2.15827	2.32759e-08	5.87978e-08			AT2G02930	GSTF3	-1.44646	7.90145e-10	2.14922e-09
AT1G29270	AT1G29270	2.1582	8.43067e-81	9.39103e-80			AT3G05490	RALFL22	-1.4455	9.27104e-155	1.96626e-153
AT2G44800	AT2G44800	2.15786	1.3447e-13	4.30104e-13			AT1G64700	AT1G64700	-1.44473	5.54096e-16	1.93458e-15
AT5G24105	AGP41	2.15742	2.30529e-38	1.4177e-37			AT5G58720	AT5G58720	-1.44457	0	0
AT1G65890	AAE12	2.15585	1.11282e-11	3.3025e-11			AT1G07000	ATEXO70B2	-1.44016	2.72422e-237	9.02905e-236
AT1G78760	AT1G78760	2.15566	2.33997e-15	7.99546e-15			AT1G53260	AT1G53260	-1.43958	0.0258082	0.039083
AT2G01960	TET14	2.15347	0.000610506	0.00111874			AT2G13360	AGT1	-1.43859	0	0
AT2G45135	AT2G45135	2.15254	1.38656e-28	6.94769e-28			AT4G09850	AT4G09850	-1.43691	0.0268765	0.0405761
AT3G47420	ATPS3	2.1521	3.528e-183	8.82689e-182			AT5G57015	ckl12	-1.43618	1.7374e-117	2.7855e-116
AT3G25640	AT3G25640	2.15197	1.2812e-35	7.44826e-35			AT2G18196	AT2G18196	-1.43598	1.88808e-32	1.03096e-31
AT2G27250	CLV3	2.15186	2.63209e-08	6.63069e-08			AT3G50770	CML41	-1.43533	2.84907e-39	1.78468e-38
AT3G14360	AT3G14360	2.15027	2.032e-181	5.04455e-180			AT5G65274	ARPC5B	-1.43394	0.0309824	0.0463028
AT1G53690	NRPB12L	2.15003	2.16661e-15	7.41498e-15			AT3G07040	RPM1	-1.43378	4.39278e-97	5.8222e-96
AT3G52130	AT3G52130	2.14991	0.0013252	0.00235318			AT3G17800	AT3G17800	-1.43364	4.52581e-301	2.00955e-299
AT1G67290	AT1G67290	2.14825	0.0010399	0.00186323			AT5G65920	PUB31	-1.43342	9.62399e-153	2.01279e-151
AT3G21351	AT3G21351	2.14774	1.34263e-78	1.46375e-77			AT1G01720	NAC002	-1.43338	2.402e-221	7.25699e-220
AT1G70830	MLP28	2.14661	0	0			AT4G26730	AT4G26730	-1.43262	0.0332269	0.0494208
AT5G57240	ORP4C	2.1465	1.77666e-162	3.97538e-161			AT5G10605	AT5G10605	-1.4322	2.42472e-07	5.73816e-07
AT3G50030	AT3G50030	2.14603	9.52313e-13	2.95021e-12			AT4G38460	GGR	-1.43086	3.08961e-133	5.62585e-132
AT3G21352	AT3G21352	2.14348	1.48112e-07	3.55435e-07			AT1G71920	HISN6B	-1.42903	8.66968e-08	2.11138e-07
AT1G09812	AT1G09812	2.14265	1.32024e-19	5.16958e-19			AT2G26500	AT2G26500	-1.4277	9.38747e-75	9.77273e-74
AT4G24070	AT4G24070	2.14255	0.00130348	0.00231621			AT3G28958	AT3G28958	-1.42754	0.0281761	0.0423883
AT4G34810	AT4G34810	2.14224	1.2422e-33	6.97311e-33			AT1G44740	AT1G44740	-1.42722	2.06857e-05	4.29542e-05
AT4G27200	AT4G27200	2.14213	0.000858719	0.00155129			AT3G49130	AT3G49130	-1.42722	0.000108085	0.000211579
AT5G03668	AT5G03668	2.14106	6.03902e-06	1.30268e-05			AT3G29010	AT3G29010	-1.42664	1.42121e-21	5.9196e-21
AT5G66690	UGT72E2	2.14095	0	0			AT1G54215	AT1G54215	-1.42514	0.0210377	0.0322804
AT2G02660	AT2G02660	2.14073	0.0012863	0.00228823			AT1G52930	AT1G52930	-1.42487	5.17854e-103	7.29781e-102
AT2G28860	CYP710A4	2.13933	0.000241864	0.000460539			AT1G51620	AT1G51620	-1.42441	3.63284e-07	8.50139e-07
AT4G27250	AT4G27250	2.13923	2.33807e-23	1.02448e-22			AT1G74330	AT1G74330	-1.42422	5.57965e-115	8.75386e-114
AT3G03530	NPC4	2.13583	4.36466e-59	3.7449e-58			AT1G19025	AT1G19025	-1.42304	1.12294e-39	7.09316e-39
AT2G34490	CYP710A2	2.1357	1.05385e-231	3.36654e-230			AT3G24900	AtRLP39	-1.4222	0.000170424	0.000328933
AT3G02310	2024-09-02	2.13505	2.07709e-10	5.80634e-10			AT4G11410	AT4G11410	-1.42218	3.6267e-51	2.77361e-50
AT1G62580	AT1G62580	2.13493	6.41214e-30	3.31007e-29			AT3G47570	AT3G47570	-1.42217	2.5359e-197	6.72565e-196
AT3G42806	AT3G42806	2.1345	0	0			AT5G63300	AT5G63300	-1.4221	9.29844e-05	0.000182983
AT2G27535	AT2G27535	2.13182	0.00103461	0.00185426			AT3G25820	TPS27	-1.42097	1.37436e-50	1.0396e-49
AT2G31860	AT2G31860	2.13181	1.70426e-07	4.07153e-07			AT1G21100	AT1G21100	-1.42035	1.33469e-157	2.8954e-156
AT1G12200	AT1G12200	2.12789	0	0			AT2G40140	CZF1	-1.41763	0	0
AT2G36870	XTH32	2.12662	7.57259e-86	8.95292e-85			AT1G03210	AT1G03210	-1.41742	4.66784e-55	3.79772e-54
AT2G25130	AT2G25130	2.12604	5.97838e-20	2.36733e-19			AT1G18990	MYOB5	-1.41695	0.00679318	0.0111358
AT2G26160	AT2G26160	2.12454	0.00152788	0.00269737			AT1G10110	AT1G10110	-1.41682	1.90476e-07	4.53615e-07
AT3G60950	AT3G60950	2.12446	8.0902e-05	0.000159882			AT2G12400	AT2G12400	-1.4167	3.31592e-218	9.85543e-217
AT1G04600	XI-A	2.12406	6.74821e-30	3.48006e-29			AT5G35970	AT5G35970	-1.41664	0	0
AT3G23290	LSH4	2.12396	7.92727e-60	6.86601e-59			AT2G35640	AT2G35640	-1.41604	5.90476e-12	1.77413e-11
AT1G79130	SAUR40	2.12391	0.00156144	0.00275264			AT1G55390	AT1G55390	-1.41542	3.86186e-05	7.8338e-05
AT5G07490	AT5G07490	2.12288	0.00142659	0.00252622			AT5G47590	AT5G47590	-1.41508	1.79674e-11	5.28623e-11
AT5G62850	SWEET5	2.12276	1.57511e-55	1.29134e-54			AT5G24800	BZIP9	-1.41301	2.2616e-129	4.01263e-128
AT3G13650	DIR7	2.12056	3.54286e-59	3.04182e-58			AT5G62430	CDF1	-1.41004	1.95887e-13	6.23508e-13
AT1G12890	ERF088	2.11916	2.61776e-20	1.04863e-19			AT4G39640	GGT1	-1.40762	2.63235e-183	6.59889e-182
AT1G47760	AGL102	2.11823	2.48769e-20	9.97722e-20			AT3G30350	RGF4	-1.4075	6.70976e-15	2.253e-14
AT2G01610	AT2G01610	2.11721	2.3084e-91	2.89908e-90			AT1G53560	AT1G53560	-1.40699	2.60146e-57	2.18451e-56
AT2G33175	AT2G33175	2.11676	8.12418e-07	1.86073e-06			AT1G53840	PME1	-1.4061	0	0
AT1G19830	AT1G19830	2.11549	7.32037e-15	2.45449e-14			AT2G48010	RKF3	-1.40568	3.54936e-53	2.81096e-52
AT1G57650	AT1G57650	2.11409	0.00115465	0.00206118			AT2G38230	PDX11	-1.40564	1.03932e-92	1.32475e-91
AT1G30050	AT1G30050	2.1123	3.01564e-08	7.56567e-08			AT4G13800	AT4G13800	-1.40493	3.16836e-05	6.47418e-05
AT4G25530	HDG6	2.11154	2.26268e-05	4.6814e-05			AT2G37970	SOUL-1	-1.40328	1.4686e-113	2.28171e-112
AT5G49615	TAS3b	2.11125	0.00165195	0.002906			AT1G75430	BLH11	-1.40321	0.000300132	0.000566604
AT1G48000	MYB112	2.11104	4.26573e-31	2.26035e-30			AT4G04420	AT4G04420	-1.40225	0.00821893	0.0133331
AT5G57530	XTH12	2.10857	1.91941e-56	1.59453e-55			AT3G15850	ADS3	-1.40029	0	0
AT5G03150	JKD	2.10566	3.08645e-178	7.50949e-177			AT5G63160	BT1	-1.40004	0	0
AT2G40475	AT2G40475	2.10513	2.32035e-113	3.6007e-112			AT5G07040	ATL69	-1.39943	4.1622e-05	8.42171e-05
AT4G13700	ATPAP23	2.10356	4.14317e-05	8.38518e-05			AT4G14103	AT4G14103	-1.39794	7.63557e-12	2.28505e-11
AT4G01420	CBL5	2.10206	0.00171688	0.00301339			AT1G18210	CML27	-1.39654	0	0
AT5G57735	TASIR-ARF	2.10167	0.000300615	0.000567431			AT4G24050	AT4G24050	-1.39548	2.12846e-58	1.80926e-57
AT3G14210	ESM1	2.10063	0	0			AT1G53540	HSP17.6C	-1.39433	0.00506027	0.00841626
AT1G15560	AT1G15560	2.09914	0.000453961	0.000842118			AT4G33930	AT4G33930	-1.39401	0.000349177	0.000654802
AT1G52110	AT1G52110	2.09736	5.50661e-10	1.50774e-09			AT4G12382	AT4G12382	-1.39394	0.00128987	0.00229361
AT3G45130	LAS1	2.09721	2.57126e-28	1.27839e-27			AT3G48390	AT3G48390	-1.39319	8.27656e-115	1.29691e-113
AT5G38240	AT5G38240	2.09707	4.08912e-27	1.97517e-26			AT5G14700	AT5G14700	-1.39309	7.9619e-51	6.04755e-50
AT5G64800	CLE21	2.09393	2.44499e-06	5.41686e-06			AT4G03813	AT4G03813	-1.39272	0.00358518	0.00607489
AT2G16005	AT2G16005	2.09324	3.57955e-20	1.42892e-19			AT4G00150	SCL6	-1.39069	1.36522e-100	1.88049e-99
AT3G55110	ABCG18	2.09287	5.81355e-87	6.94698e-86			AT4G18070	AT4G18070	-1.39042	0	0
AT4G22233	AT4G22233	2.09012	6.88168e-16	2.39647e-15			AT1G43160	RAP2-6	-1.38732	6.11918e-12	1.83661e-11
AT3G45095	AT3G45095	2.08975	1.25612e-20	5.07678e-20			AT3G55880	SUE4	-1.38627	6.65462e-94	8.58034e-93
AT2G18115	AT2G18115	2.08928	0.00147266	0.00260474			AT1G61575	AT1G61575	-1.38591	0.0108528	0.0173239
AT1G49005	CLE11	2.08852	0.000176523	0.000340294			AT2G22630	AGL17	-1.38423	4.97414e-09	1.29866e-08
AT2G27550	CEN	2.08527	6.08879e-207	1.69008e-205			AT3G13680	AT3G13680	-1.38423	0.0329114	0.0489884
AT3G10880	AT3G10880	2.08492	5.58535e-23	2.42455e-22			AT5G45070	PP2A8	-1.38342	4.66897e-24	2.08323e-23
AT2G20030	ATL12	2.08299	2.26592e-09	6.01749e-09			AT1G07870	AT1G07870	-1.38289	4.45894e-111	6.78374e-110
AT1G11560	OST3A	2.08279	0.0017106	0.00300258			AT4G26320	AGP13	-1.38136	1.05486e-16	3.77452e-16
AT3G07120	AT3G07120	2.08257	8.6305e-15	2.88773e-14			AT3G10113	RVE7L	-1.38088	4.53047e-05	9.13942e-05
AT2G26400	ARD1	2.08182	5.62916e-05	0.000112724			AT5G67260	CYCD3-2	-1.37956	0	0
AT4G22080	RHS14	2.08179	8.89826e-38	5.40349e-37			AT5G04080	AT5G04080	-1.37952	7.54001e-107	1.10702e-105
AT5G57785	AT5G57785	2.08177	9.6632e-176	2.32026e-174			AT4G37860	AT4G37860	-1.37896	0.0234408	0.0357218
AT4G18250	AT4G18250	2.0815	1.52927e-103	2.16943e-102			AT5G22140	AT5G22140	-1.37883	3.78627e-45	2.61326e-44
AT3G03850	AT3G03850	2.08065	8.63082e-16	2.99501e-15			AT5G18470	AT5G18470	-1.37812	2.71218e-131	4.86257e-130
AT2G19990	PR-1-LIKE	2.08041	1.73676e-24	7.84341e-24			AT3G11650	NHL2	-1.37757	8.07264e-83	9.20841e-82
AT1G21220	AT1G21220	2.07872	2.28844e-10	6.38729e-10			AT5G38800	BZIP43	-1.37635	0.027063	0.0408312
AT4G24010	CSLG1	2.07854	4.51816e-06	9.8331e-06			AT1G17640	AT1G17640	-1.37577	1.86519e-43	1.25259e-42
AT1G66390	MYB90	2.07617	0.000247157	0.000470199			AT3G20935	CYP705A28	-1.37571	2.41603e-11	7.06696e-11
AT5G45080	PP2A6	2.07501	6.54721e-15	2.20015e-14			AT4G28080	AT4G28080	-1.37563	0	0
AT4G12480	EARLI1	2.07369	0	0			AT3G15870	ADS3.2	-1.37456	0.0290406	0.0435954
AT2G40530	AT2G40530	2.07341	2.43487e-60	2.12543e-59			AT4G39570	AT4G39570	-1.37404	5.15934e-107	7.58795e-106
AT1G10550	XTH33	2.0707	1.24503e-69	1.23015e-68			AT4G17220	MAP70.5	-1.37315	1.05517e-11	3.13687e-11
AT4G30662	AT4G30662	2.07069	2.03886e-07	4.84514e-07			AT5G14020	AT5G14020	-1.37252	1.4524e-12	4.47079e-12
AT3G58070	GIS	2.06763	2.85952e-10	7.94588e-10			AT5G53050	AT5G53050	-1.3695	3.81677e-163	8.56267e-162
AT4G17680	AT4G17680	2.06679	3.38844e-30	1.76089e-29			AT5G26770	AT5G26770	-1.36867	1.77488e-129	3.15342e-128
AT1G11170	AT1G11170	2.06668	1.32624e-211	3.79646e-210			AT5G42590	CYP71A16	-1.36634	2.01632e-22	8.63124e-22
AT5G44270	AT5G44270	2.06255	0.00150934	0.00266574			AT1G58037	AT1G58037	-1.36601	0.000735313	0.00133712
AT1G46480	WOX4	2.06165	1.60368e-75	1.68318e-74			AT5G19230	AT5G19230	-1.36542	6.43992e-169	1.49584e-167
AT4G34560	AT4G34560	2.06146	1.49924e-167	3.45107e-166			AT5G65280	GCL1	-1.3652	3.12856e-30	1.62683e-29
AT4G31950	CYP82C3	2.05808	0.00037034	0.000693069			AT3G52840	BGAL2	-1.36492	5.12493e-177	1.24103e-175
AT4G19452	AT4G19452	2.05797	0.00212821	0.00369609			AT3G16350	AT3G16350	-1.36446	8.26241e-56	6.81529e-55
AT1G19670	CLH1	2.05682	1.0829e-262	4.09805e-261			AT4G18090	AT4G18090	-1.36402	0.0182699	0.0282842
AT1G64618	AT1G64618	2.05666	0.00169599	0.00297877			AT1G67020	AT1G67020	-1.36389	0.00213502	0.00370767
AT1G24620	CML25	2.0527	1.40479e-07	3.37466e-07			AT5G43890	YUC5	-1.36344	3.98318e-11	1.15302e-10
AT2G46990	IAA20	2.05076	2.4149e-09	6.40539e-09			AT1G32270	SYP24	-1.36313	0.0326686	0.0486438
AT2G41690	HSFB3	2.04993	8.18805e-10	2.22576e-09			AT5G08030	GDPD6	-1.36304	0.00205148	0.00357107
AT2G13430	AT2G13430	2.04957	9.2239e-06	1.96309e-05			AT3G06433	AT3G06433	-1.36216	2.64406e-61	2.34398e-60
AT4G37895	AT4G37895	2.04898	7.62799e-06	1.63361e-05			AT4G12410	AT4G12410	-1.36174	0.000846814	0.00153054
AT1G48590	AT1G48590	2.04736	0.00231376	0.00400206			AT3G13061	AT3G13061	-1.35994	2.36768e-05	4.89232e-05
AT5G66580	AT5G66580	2.0469	5.57428e-87	6.66416e-86			AT1G19040	AT1G19040	-1.35926	0.0236908	0.0360727
AT2G41810	AT2G41810	2.04681	1.3858e-06	3.12674e-06			AT3G26310	CYP71B35	-1.35924	3.50771e-40	2.23718e-39
AT3G27400	AT3G27400	2.04526	7.23878e-106	1.04838e-104			AT5G65600	LECRK92	-1.35797	4.56599e-16	1.59984e-15
AT5G45095	AT5G45095	2.04407	3.60842e-13	1.13754e-12			AT4G19925	AT4G19925	-1.35712	0.0284633	0.0427952
AT2G21770	CESA9	2.04262	8.43275e-61	7.43196e-60			AT4G36820	AT4G36820	-1.35605	0.000196168	0.000376693
AT1G68570	NPF3.1	2.04212	5.77928e-237	1.9056e-235			AT4G15690	GRXS5	-1.35444	7.53966e-63	6.85473e-62
AT5G46013	AT5G46013	2.0412	0.00228145	0.00394777			AT5G52000	IMPA8	-1.35379	0.0175279	0.0271896
AT2G21990	AT2G21990	2.04056	0.00047265	0.000874633			AT5G09730	BXL3	-1.35136	0.00220619	0.00382426
AT1G17745	PGDH2	2.04054	5.64102e-253	2.02413e-251			AT1G14870	PCR2	-1.3504	0	0
AT3G14380	AT3G14380	2.04009	0.00207823	0.00361591			AT3G46690	UGT76E4	-1.34995	9.14759e-33	5.04111e-32
AT3G15300	VQ19	2.0382	2.18776e-47	1.57004e-46			AT2G38400	AGT3	-1.3482	0	0
AT3G05720	IMPA7	2.03615	8.12785e-16	2.82277e-15			AT1G72070	AT1G72070	-1.34714	9.37219e-56	7.72572e-55
AT4G25950	VHA-G3	2.03605	0.000642516	0.00117496			AT2G41210	PIP5K5	-1.34698	7.39116e-53	5.81756e-52
AT2G15800	AT2G15800	2.03585	1.21194e-15	4.18744e-15			AT3G17690	CNGC19	-1.34585	1.96186e-12	6.01589e-12
AT1G28660	AT1G28660	2.03561	2.99833e-166	6.86481e-165			AT1G24140	AT1G24140	-1.34554	4.899e-32	2.64794e-31
AT2G47870	GRXC12	2.03543	7.46723e-05	0.000147959			AT3G51450	SSL7	-1.34547	1.57143e-32	8.59704e-32
AT5G66260	AT5G66260	2.03063	0.00239762	0.00414123			AT2G24680	REM12	-1.34543	3.87375e-05	7.85729e-05
AT3G61118	AT3G61118	2.03045	2.1288e-05	4.41547e-05			AT2G26695	AT2G26695	-1.34408	1.59638e-22	6.85081e-22
AT4G17690	PER41	2.02989	0.00226867	0.00392779			AT4G10400	AT4G10400	-1.343	3.38535e-25	1.5563e-24
AT3G60790	AT3G60790	2.02964	0.00251222	0.00433308			AT1G04490	AT1G04490	-1.34212	2.629e-27	1.2759e-26
AT5G21080	AT5G21080	2.02912	4.59442e-11	1.3257e-10			AT1G76070	AT1G76070	-1.34212	6.89165e-37	4.09756e-36
AT5G26220	AT5G26220	2.0283	5.4508e-49	4.01754e-48			AT4G39675	AT4G39675	-1.34186	1.30024e-59	1.12313e-58
AT1G09155	PP2B15	2.02828	9.76703e-38	5.92544e-37			AT4G11890	CRK45	-1.33917	1.18759e-11	3.5199e-11
AT2G25240	AT2G25240	2.02827	2.03165e-26	9.62656e-26			AT1G16160	WAKL5	-1.3389	5.4036e-05	0.000108368
AT1G22210	TPPC	2.02719	0.00245742	0.00424139			AT3G28915	AT3G28915	-1.33784	0.0252902	0.0383439
AT5G15140	AT5G15140	2.02717	0.00208966	0.00363332			AT1G78640	AT1G78640	-1.33765	0.0185181	0.0286459
AT1G49150	AT1G49150	2.02411	0.000135203	0.000262835			AT2G14560	LURP1	-1.33701	8.73349e-56	7.20155e-55
AT1G76800	AT1G76800	2.02057	1.44243e-16	5.13908e-16			AT5G02170	AT5G02170	-1.33416	2.29202e-18	8.65463e-18
AT4G13390	AT4G13390	2.02022	3.58982e-72	3.64242e-71			AT3G48090	EDS1	-1.33387	5.28628e-93	6.7582e-92
AT1G02040	AT1G02040	2.01957	2.15674e-05	4.47124e-05			AT1G15380	AT1G15380	-1.33291	1.824e-128	3.20734e-127
AT4G20160	AT4G20160	2.01933	0.00185359	0.00324009			AT5G62770	AT5G62770	-1.3322	9.34842e-27	4.47174e-26
AT5G54040	AT5G54040	2.01851	8.27591e-41	5.34078e-40			AT4G00970	CRK41	-1.33039	3.83073e-134	7.03032e-133
AT1G24070	CSLA10	2.0174	6.87428e-39	4.26852e-38			AT5G40460	AT5G40460	-1.32977	3.03072e-22	1.29132e-21
AT5G13250	AT5G13250	2.01689	1.50884e-37	9.11711e-37			AT3G26816	MIR169L	-1.3294	0.0247032	0.0375183
AT4G32460	AT4G32460	2.01577	0	0			AT1G15190	FLA19	-1.32904	6.52268e-05	0.000129906
AT1G28000	AT1G28000	2.01531	0.00267048	0.00459241			AT1G02110	AT1G02110	-1.32884	8.43821e-92	1.06339e-90
AT5G49180	PME58	2.01524	0.00100015	0.0017959			AT1G58420	AT1G58420	-1.32834	2.19734e-26	1.0402e-25
AT2G45870	AT2G45870	2.0142	2.36605e-67	2.27717e-66			AT1G47270	TULP6	-1.32527	2.80899e-72	2.85694e-71
AT5G11410	AT5G11410	2.01417	3.08308e-23	1.34701e-22			AT3G48120	AT3G48120	-1.32371	1.24054e-66	1.18548e-65
AT4G14390	AT4G14390	2.01313	3.21408e-29	1.63188e-28			AT5G54470	AT5G54470	-1.32314	5.37409e-05	0.00010781
AT2G21780	AT2G21780	2.01251	9.28368e-16	3.21764e-15			AT2G28570	AT2G28570	-1.32173	2.22889e-62	2.00647e-61
AT1G55440	AT1G55440	2.01012	4.55096e-05	9.18003e-05			AT4G18080	AT4G18080	-1.32124	0.0209722	0.0321818
AT1G18410	AT1G18410	2.00878	1.09991e-11	3.26531e-11			AT4G15340	PEN1	-1.3206	1.57192e-55	1.28914e-54
AT1G22900	DIR11	2.00754	8.31996e-67	7.97148e-66			AT1G26700	MLO14	-1.31953	0.0028876	0.00494389
AT1G10010	AAP8	2.00673	0.00167027	0.00293642			AT1G43675	AT1G43675	-1.31797	3.3949e-20	1.35563e-19
AT1G23970	AT1G23970	2.00541	1.71281e-233	5.5407e-232			AT3G57880	AT3G57880	-1.31717	1.09838e-237	3.64987e-236
AT5G39850	RPS9C	2.00484	1.72285e-305	7.82614e-304			AT1G09080	MED37B	-1.31363	1.18124e-08	3.02966e-08
AT1G54120	AT1G54120	2.00465	2.26342e-23	9.92448e-23			AT5G39670	CML45	-1.31333	1.15351e-25	5.36255e-25
AT3G13784	AtcwINV5	2.00333	3.23227e-05	6.59951e-05			AT3G25830	TPS27	-1.3108	5.35413e-28	2.64149e-27
AT1G78090	TPPB	2.00228	1.52793e-66	1.45848e-65			AT1G51520	AT1G51520	-1.31006	9.62956e-18	3.5755e-17
AT3G12610	DRT100	2.00214	0	0			AT3G52830	AT3G52830	-1.3092	0.00832169	0.0134895
AT4G25750	ABCG4	2.00011	3.41542e-27	1.65475e-26			AT1G20570	AT1G20570	-1.30874	4.7118e-05	9.49177e-05
AT3G15700	AT3G15700	1.99958	1.55083e-07	3.71364e-07			AT1G71500	AT1G71500	-1.30729	1.62264e-213	4.69211e-212
AT2G36610	ATHB-22	1.99759	6.68535e-05	0.000133063			AT3G51478	AT3G51478	-1.30669	2.96952e-08	7.458e-08
AT5G41380	AT5G41380	1.99542	6.26938e-08	1.54266e-07			AT2G25680	MOT1	-1.30601	2.26607e-09	6.01749e-09
AT1G29420	SAUR61	1.99442	0.000843459	0.00152469			AT5G18636	AT5G18636	-1.30595	4.83054e-05	9.72102e-05
AT5G42510	DIR1	1.99346	8.28319e-20	3.26334e-19			AT1G12240	BFRUCT4	-1.30537	0	0
AT4G14620	AT4G14620	1.99334	0.000886949	0.00159981			AT5G58750	AT5G58750	-1.30307	5.49126e-17	1.98373e-16
AT3G58795	AT3G58795	1.99302	0.00174296	0.00305665			AT2G05510	AT2G05510	-1.30211	4.53482e-49	3.3453e-48
AT3G58780	AGL1	1.99261	1.92594e-14	6.36678e-14			AT4G14090	UGT75C1	-1.30103	1.54013e-13	4.91813e-13
AT3G14370	WAG2	1.99212	2.6632e-35	1.54125e-34			AT5G41315	GL3	-1.3007	2.75256e-06	6.07937e-06
AT3G09190	AT3G09190	1.98894	2.33776e-54	1.88226e-53			AT3G47210	AT3G47210	-1.30007	2.60863e-31	1.38687e-30
AT4G18690	AT4G18690	1.98802	0.00178129	0.00312046			AT2G14100	CYP705A13	-1.29959	1.48532e-17	5.47853e-17
AT1G19640	JMT	1.98782	4.20096e-05	8.49609e-05			AT4G34060	DML3	-1.29899	1.22225e-26	5.83127e-26
AT5G20740	AT5G20740	1.98708	1.48441e-48	1.08659e-47			AT1G15175	AT1G15175	-1.29891	2.72058e-09	7.19609e-09
AT3G26200	CYP71B22	1.98504	1.32027e-66	1.26073e-65			AT1G67865	AT1G67865	-1.29883	2.59357e-43	1.73809e-42
AT5G35205	AT5G35205	1.9839	0.00316677	0.00540021			AT1G67060	AT1G67060	-1.29785	8.32403e-67	7.9724e-66
AT4G25930	AT4G25930	1.98329	0.00251817	0.0043423			AT2G20960	pEARLI4	-1.29751	1.41836e-236	4.65877e-235
AT5G14650	AT5G14650	1.98248	5.59867e-73	5.73293e-72			AT3G43250	AT3G43250	-1.29717	0.0225301	0.0344179
AT4G23990	CSLG3	1.98219	1.23626e-29	6.33461e-29			AT3G47340	ASN1	-1.29667	0	0
AT1G08180	SMR2	1.98183	3.97382e-55	3.24027e-54			AT5G17650	AT5G17650	-1.29624	9.22038e-52	7.11525e-51
AT2G19650	AT2G19650	1.98159	8.89046e-38	5.40004e-37			AT5G14180	LIP2	-1.2958	2.20969e-240	7.42943e-239
AT3G13857	AT3G13857	1.98123	0.00280602	0.00481289			AT4G37290	AT4G37290	-1.29548	6.85151e-05	0.000136254
AT1G61050	AT1G61050	1.98101	4.63845e-29	2.34578e-28			AT1G60950	FD2	-1.29487	0	0
AT5G45580	AT5G45580	1.98082	1.04585e-16	3.7428e-16			AT1G22590	AGL87	-1.29382	4.14286e-77	4.45032e-76
AT5G20640	AT5G20640	1.9768	7.48333e-12	2.24002e-11			AT4G16840	AT4G16840	-1.29306	1.55964e-27	7.60089e-27
AT1G62090	AT1G62090	1.97459	0.00252414	0.00435126			AT4G28840	AT4G28840	-1.29305	7.47281e-10	2.03392e-09
AT1G54940	GUX4	1.97415	3.9169e-16	1.37637e-15			AT5G27290	AT5G27290	-1.29276	1.29952e-101	1.80649e-100
AT2G29950	EFL1	1.9741	1.99707e-38	1.22875e-37			AT2G32510	MAPKKK17	-1.29257	1.58545e-09	4.24844e-09
AT3G13672	AT3G13672	1.97399	9.07584e-20	3.57068e-19			AT1G69920	GSTU12	-1.29139	0.000216028	0.000413311
AT3G21000	AT3G21000	1.97123	9.61152e-07	2.18886e-06			AT3G59580	NLP9	-1.29122	1.29613e-08	3.31803e-08
AT1G68610	PCR11	1.97098	0.0032705	0.00556746			AT3G15810	AT3G15810	-1.29091	4.38424e-78	4.75346e-77
AT1G07985	AT1G07985	1.97093	1.23521e-77	1.33247e-76			AT1G20490	AT1G20490	-1.2906	2.05819e-31	1.09924e-30
AT2G19590	ACO1	1.97021	8.77194e-263	3.32451e-261			AT5G05320	AT5G05320	-1.29057	5.58334e-22	2.36048e-21
AT2G26135	AT2G26135	1.9691	0.00276512	0.00474656			AT5G49990	NAT5	-1.28953	3.80676e-80	4.20928e-79
AT3G05800	BHLH150	1.9645	2.06011e-99	2.80298e-98			AT5G18404	AT5G18404	-1.28883	0.00491208	0.00818414
AT4G08990	MET2	1.96354	3.0538e-09	8.05585e-09			AT4G20380	LSD1	-1.28802	1.63345e-201	4.43315e-200
AT1G66235	AT1G66235	1.96274	0.0032473	0.00553017			AT5G67310	CYP81G1	-1.28797	0.0138067	0.0217143
AT5G37250	AT5G37250	1.96219	0.00117524	0.00209677			AT1G18330	RVE7	-1.28755	6.82933e-58	5.7726e-57
AT1G19840	AT1G19840	1.96191	9.71302e-37	5.75503e-36			AT2G34500	CYP710A1	-1.28631	3.04695e-18	1.14612e-17
AT1G24470	KCR2	1.96164	3.06323e-30	1.5935e-29			AT4G30210	ATR2	-1.28613	0	0
AT5G19790	RAP2-11	1.96107	6.14515e-25	2.80739e-24			AT2G33250	AT2G33250	-1.28566	1.13396e-113	1.76501e-112
AT4G25820	XTH14	1.96096	2.47644e-201	6.69267e-200			AT2G46500	PI4KG4	-1.28475	0	0
AT5G64685	AT5G64685	1.95623	5.29372e-31	2.79755e-30			AT5G18400	AT5G18400	-1.28423	8.41798e-225	2.60155e-223
AT5G05290	EXPA2	1.9554	0.00092575	0.00166721			AT1G77380	AAP3	-1.28408	9.30955e-95	1.20826e-93
AT1G27040	NPF4.5	1.955	3.20404e-06	7.03526e-06			AT1G75030	ATLP-3	-1.28328	7.40784e-06	1.58819e-05
AT1G33030	AT1G33030	1.95282	1.37308e-24	6.21413e-24			AT4G10845	AT4G10845	-1.28295	2.20882e-07	5.23933e-07
AT3G03830	AT3G03830	1.9528	0.000114104	0.000223054			AT2G31085	CLE6	-1.28285	4.36855e-06	9.51395e-06
AT2G45360	AT2G45360	1.95279	1.79159e-21	7.43812e-21			AT4G11780	AT4G11780	-1.28252	9.9606e-05	0.000195623
AT5G44680	AT5G44680	1.95173	0	0			AT4G19530	AT4G19530	-1.28167	1.42547e-277	5.76946e-276
AT4G09780	AT4G09780	1.95154	0.00154603	0.00272678			AT4G22980	AT4G22980	-1.28121	5.0754e-32	2.74155e-31
AT2G26692	AT2G26692	1.95027	3.36367e-05	6.85579e-05			AT4G22212	AT4G22212	-1.27982	3.633e-08	9.0701e-08
AT5G22560	AT5G22560	1.95022	3.64154e-06	7.96518e-06			AT4G13410	CSLA15	-1.27966	4.68982e-12	1.4149e-11
AT4G19680	IRT2	1.94986	3.26422e-30	1.69668e-29			AT1G50040	AT1G50040	-1.2787	8.37219e-27	4.01001e-26
AT1G55265	AT1G55265	1.94935	9.18528e-77	9.79304e-76			AT2G04040	DTX1	-1.27853	2.74513e-61	2.43273e-60
AT1G07090	LSH6	1.948	8.43645e-118	1.35512e-116			AT4G04410	AT4G04410	-1.27846	1.15304e-21	4.82064e-21
AT4G13260	YUC2	1.94788	5.89346e-17	2.12693e-16			AT5G66800	AT5G66800	-1.27843	1.19135e-16	4.25516e-16
AT1G69490	NAC029	1.94736	3.65133e-45	2.52148e-44			AT2G23290	AtMYB70	-1.27766	3.54431e-45	2.4489e-44
AT3G03780	MS2	1.94543	0	0			AT4G13810	AtRLP47	-1.27753	3.52431e-93	4.51691e-92
AT4G31910	AT4G31910	1.94486	3.5934e-174	8.564e-173			AT5G04781	AT5G04781	-1.27745	0.0022802	0.00394587
AT2G17845	AT2G17845	1.94393	0.00230139	0.00398173			AT4G23230	CRK15	-1.2768	0.000580771	0.001067
AT5G38550	JAL44	1.9431	7.06895e-48	5.11456e-47			AT5G42050	AT5G42050	-1.27598	0	0
AT1G27560	AT1G27560	1.94215	1.46733e-15	5.05691e-15			AT5G45960	AT5G45960	-1.27571	3.72669e-05	7.56702e-05
AT1G48300	AT1G48300	1.9414	0	0			AT3G17510	CIPK1	-1.2757	1.64735e-303	7.40439e-302
AT2G45290	TKL-2	1.93896	1.5972e-283	6.68633e-282			AT1G12580	PEPKR1	-1.27377	5.77149e-281	2.38493e-279
AT5G35207	AT5G35207	1.93834	0.00386445	0.00652006			AT3G56000	CSLA14	-1.27299	9.15375e-28	4.48754e-27
AT1G33960	AIG1	1.93821	7.47902e-39	4.63953e-38			AT1G07110	FKFBP	-1.27297	0	0
AT3G46800	AT3G46800	1.93748	2.72757e-05	5.60837e-05			AT5G47040	LON2	-1.27295	0	0
AT1G06330	AT1G06330	1.93653	2.75568e-05	5.66435e-05			AT3G03050	CSLD3	-1.27236	0	0
AT3G25760	AOC1	1.93628	0	0			AT5G43380	TOPP7	-1.27204	6.95377e-63	6.32655e-62
AT1G26515	AT1G26515	1.93488	0.00310541	0.00530227			AT2G44560	AtGH9B11	-1.27198	0.0261458	0.0395499
AT1G72830	NFYA3	1.93476	1.7001e-122	2.84683e-121			AT1G58122	CPuORF45	-1.27181	0.006081	0.010028
AT3G30460	AT3G30460	1.93451	6.63593e-15	2.22909e-14			AT1G65860	FMOGS-OX1	-1.27169	1.34195e-37	8.11824e-37
AT1G06170	BHLH89	1.93404	0.00102925	0.00184569			AT5G17170	ENH1	-1.27058	0	0
AT2G23180	CYP96A1	1.93394	3.52694e-49	2.6078e-48			AT1G68010	HPR	-1.27024	0	0
AT1G23060	AT1G23060	1.93344	5.63754e-27	2.71237e-26			AT4G36530	AT4G36530	-1.2701	4.80427e-236	1.57398e-234
AT1G18180	AT1G18180	1.93268	3.64322e-120	5.96798e-119			AT3G02690	AT3G02690	-1.26935	0	0
AT4G25250	AT4G25250	1.93266	2.11105e-31	1.12677e-30			AT1G63180	UGE3	-1.2689	1.03201e-105	1.4921e-104
AT3G14280	AT3G14280	1.93249	1.89085e-51	1.45171e-50			AT5G12280	AT5G12280	-1.26844	7.71056e-05	0.000152615
AT4G15380	CYP705A4	1.92908	2.87893e-40	1.83981e-39			AT2G06045	AT2G06045	-1.26724	0.0203325	0.0312458
AT4G06746	RAP2-9	1.92744	1.38429e-29	7.07908e-29			AT5G44585	AT5G44585	-1.26672	3.08906e-18	1.16112e-17
AT5G18690	AGP25	1.92539	2.19335e-51	1.68295e-50			AT3G05200	ATL6	-1.2667	1.01665e-120	1.6761e-119
AT1G52410	TSA1	1.9237	0	0			AT1G03730	AT1G03730	-1.26635	1.29902e-49	9.6719e-49
AT3G19530	AT3G19530	1.92304	1.20881e-05	2.55062e-05			AT2G44080	ARL	-1.26612	3.26341e-65	3.07272e-64
AT4G18660	AT4G18660	1.92049	0.00172051	0.00301955			AT3G57760	AT3G57760	-1.26483	1.49614e-26	7.11682e-26
AT2G39885	MIR393A	1.92008	0.0030981	0.00529085			AT1G80380	GLYK	-1.26383	0	0
AT2G29370	AT2G29370	1.91987	2.19283e-50	1.6548e-49			AT4G30390	AT4G30390	-1.26313	3.56447e-66	3.3873e-65
AT2G12462	AT2G12462	1.9198	4.29746e-31	2.2767e-30			AT5G21430	ndhU	-1.26311	3.99087e-191	1.03383e-189
AT1G16635	AT1G16635	1.91928	9.5249e-06	2.0253e-05			AT5G01770	RAPTOR2	-1.26311	6.10689e-47	4.35212e-46
AT4G37890	EDA40	1.91884	1.85512e-73	1.90876e-72			AT2G32640	AT2G32640	-1.26194	1.09118e-106	1.5984e-105
AT3G09930	AT3G09930	1.91782	0.00366953	0.00621043			AT5G48390	ZIP4	-1.2597	0.00139222	0.00246757
AT3G09330	AT3G09330	1.9165	8.83555e-16	3.06522e-15			AT4G38400	EXLA2	-1.25935	7.21699e-23	3.11908e-22
AT3G62630	AT3G62630	1.91645	2.90484e-252	1.03508e-250			AT4G05010	AT4G05010	-1.25931	1.95116e-30	1.01872e-29
AT4G09480	AT4G09480	1.9159	1.08942e-08	2.79781e-08			AT4G30270	XTH24	-1.25852	0	0
AT3G60280	UCC3	1.91556	5.67646e-12	1.70734e-11			AT1G06265	AT1G06265	-1.25823	1.288e-42	8.53779e-42
AT1G26945	PRE6	1.91539	5.60771e-112	8.60296e-111			AT3G52710	AT3G52710	-1.25813	1.2825e-57	1.08085e-56
AT1G32450	NPF7.3	1.91463	0	0			AT2G03110	AT2G03110	-1.25799	0.00494975	0.00824314
AT3G05640	AT3G05640	1.91453	7.66085e-79	8.36976e-78			AT5G38510	AT5G38510	-1.25747	5.53686e-281	2.29167e-279
AT1G14280	PKS2	1.91275	6.31347e-154	1.33128e-152			AT1G65490	AT1G65490	-1.25691	3.86175e-35	2.22884e-34
AT2G15780	AT2G15780	1.91221	0.00404902	0.00681563			AT5G59662	AT5G59662	-1.25533	0.00435702	0.00730351
AT1G36220	AT1G36220	1.91065	0.00441111	0.00738838			AT2G23320	WRKY15	-1.25232	1.93189e-149	3.96913e-148
AT5G48050	AT5G48050	1.90976	4.69463e-06	1.02076e-05			AT4G22590	TPPG	-1.25186	6.41026e-88	7.73579e-87
AT2G43480	PER26	1.90976	5.29567e-24	2.35998e-23			AT5G07870	AT5G07870	-1.251	3.00999e-65	2.83723e-64
AT1G01660	PUB55	1.90927	1.93728e-24	8.74439e-24			AT5G42460	AT5G42460	-1.25035	1.28669e-11	3.80921e-11
AT1G30530	UGT78D1	1.90905	2.67242e-222	8.11225e-221			AT3G11110	ATL66	-1.25	4.14464e-18	1.55379e-17
AT4G15393	CYP702A5	1.90829	8.56097e-158	1.86032e-156			AT2G02270	ATPP2-B3	-1.24887	0.0192389	0.0296947
AT5G20420	CLSY2	1.90776	2.04021e-85	2.39881e-84			AT4G22592	CPuORF27	-1.2485	3.31752e-97	4.40845e-96
AT1G55290	F6'H2	1.9029	1.67295e-10	4.69761e-10			AT1G72180	AT1G72180	-1.24821	2.30235e-235	7.5046e-234
AT3G02410	ICMEL2	1.9029	5.5502e-25	2.53877e-24			AT3G15150	MMS21	-1.24734	2.71549e-17	9.92592e-17
AT2G42200	SPL9	1.9028	6.40218e-29	3.22754e-28			AT1G61065	AT1G61065	-1.2471	4.77876e-30	2.47487e-29
AT3G27440	UKL5	1.9016	5.23139e-07	1.2138e-06			AT2G15620	NIR1	-1.24631	0	0
AT4G39340	EC1.4	1.90094	0.00281599	0.00482934			AT4G16020	AT4G16020	-1.2456	0.0136207	0.0214469
AT3G42670	CLSY1	1.89967	0	0			AT2G40960	AT2G40960	-1.24541	1.48469e-25	6.88716e-25
AT5G46830	BHLH28	1.8989	0.00153595	0.00271013			AT5G27420	ATL31	-1.24431	2.67875e-52	2.0841e-51
AT1G29090	AT1G29090	1.89738	1.12694e-09	3.04397e-09			AT2G34230	AT2G34230	-1.24395	0.00991139	0.0158974
AT1G21850	sks8	1.89633	0.00450336	0.00753501			AT1G72760	AT1G72760	-1.24308	9.87709e-05	0.000194028
AT5G06250	AT5G06250	1.89594	1.29646e-09	3.49194e-09			AT3G20100	CYP705A19	-1.2427	1.52872e-46	1.08073e-45
AT2G32460	MYB101	1.89505	4.90738e-06	1.0653e-05			AT4G25700	BETA-OHASE 1	-1.24254	7.41981e-78	8.02768e-77
AT4G27810	AT4G27810	1.89348	4.80382e-10	1.31983e-09			AT3G24360	AT3G24360	-1.24229	4.31508e-05	8.71865e-05
AT4G14695	MPC2	1.8922	1.82603e-29	9.31189e-29			AT4G32800	ERF043	-1.24194	9.00721e-54	7.18669e-53
AT2G43590	AT2G43590	1.89199	0	0			AT2G32550	AT2G32550	-1.24124	8.62377e-15	2.88585e-14
AT4G22880	LDOX	1.8883	3.14366e-11	9.15027e-11			AT1G70590	AT1G70590	-1.24083	1.78058e-88	2.16099e-87
AT2G33020	AtRLP24	1.88679	1.77444e-11	5.22183e-11			AT5G42040	RPN12B	-1.23954	6.59532e-07	1.51981e-06
AT1G12600	UTR4	1.88596	3.83018e-27	1.8522e-26			AT5G05350	AT5G05350	-1.23811	5.35975e-10	1.46894e-09
AT3G42622	AT3G42622	1.88563	0.00472411	0.00788582			AT3G46710	RPP13L2	-1.23777	0.000252151	0.000479237
AT5G13210	AT5G13210	1.88546	1.66368e-59	1.43368e-58			AT5G66000	AT5G66000	-1.23775	1.94282e-18	7.35448e-18
AT2G15400	NRPD3B	1.88531	1.14417e-28	5.73875e-28			AT4G36730	GBF1	-1.23767	0	0
AT5G14920	GASA14	1.88424	7.29916e-214	2.12023e-212			AT3G63240	AT3G63240	-1.23717	1.15003e-40	7.39551e-40
AT1G26233	SNOR95	1.88069	0.000428113	0.000796243			AT5G50720	HVA22E	-1.23576	3.7195e-28	1.84178e-27
AT2G13390	AT2G13390	1.87876	0.00507253	0.00843555			AT5G66090	AT5G66090	-1.23506	1.30688e-96	1.72589e-95
AT3G06160	REM21	1.87814	8.08762e-22	3.39791e-21			AT5G04850	VPS60.2	-1.23489	4.23498e-101	5.85538e-100
AT3G63210	MARD1	1.87793	1.15251e-262	4.35507e-261			AT2G21650	RL2	-1.23485	8.02302e-07	1.83806e-06
AT4G30320	AT4G30320	1.87726	7.66563e-21	3.12082e-20			AT5G54380	THE1	-1.23435	0	0
AT1G49220	ATL10	1.87689	0.000179262	0.000345315			AT4G36500	AT4G36500	-1.2341	2.90676e-149	5.96724e-148
AT5G47000	PER65	1.87608	4.31171e-26	2.02504e-25			AT2G22650	AT2G22650	-1.23116	6.56057e-44	4.4267e-43
AT1G28570	AT1G28570	1.87607	1.08701e-57	9.17601e-57			AT1G49380	CCS1	-1.23082	1.7447e-191	4.52881e-190
AT1G49000	AT1G49000	1.87529	3.11066e-28	1.54298e-27			AT5G67250	SKIP2	-1.2304	8.80606e-155	1.86919e-153
AT2G01940	SGR5	1.87415	1.39691e-78	1.52228e-77			AT3G07360	PUB9	-1.23005	0	0
AT5G10930	CIPK5	1.87403	5.58122e-53	4.40514e-52			AT3G06100	NIP7-1	-1.22929	0.00718696	0.011752
AT1G49640	CXE3	1.87274	0.00181542	0.00317676			AT2G41800	AT2G41800	-1.22916	3.58543e-45	2.47664e-44
AT2G39700	EXPA4	1.87256	6.74626e-259	2.50492e-257			AT5G01940	AT5G01940	-1.2291	9.62918e-08	2.33927e-07
AT5G02890	AT5G02890	1.8709	1.2688e-107	1.879e-106			AT5G01740	AT5G01740	-1.22694	1.32318e-32	7.2575e-32
AT1G59930	AT1G59930	1.86984	0.000786031	0.00142601			AT1G18390	AT1G18390	-1.2258	4.67729e-103	6.59506e-102
AT4G08991	AT4G08991	1.86812	6.34722e-23	2.74921e-22			AT1G11210	AT1G11210	-1.22479	6.10455e-99	8.27068e-98
AT1G51460	ABCG13	1.86668	7.97497e-42	5.22287e-41			AT5G17670	AT5G17670	-1.22458	1.33845e-158	2.91839e-157
AT1G24020	MLP423	1.86626	5.19176e-280	2.13162e-278			AT5G51010	AT5G51010	-1.22353	1.22706e-171	2.89212e-170
AT1G11600	CYP77B1	1.86574	2.45794e-79	2.70268e-78			AT4G32860	AT4G32860	-1.22291	1.16129e-10	3.28464e-10
AT1G68470	AT1G68470	1.86525	5.62614e-47	4.01174e-46			AT5G58840	AT5G58840	-1.22159	0.00879834	0.0142091
AT2G18300	HBI1	1.86316	0	0			AT2G38750	ANN4	-1.22081	5.04346e-32	2.72487e-31
AT3G17060	PME67	1.86198	0.0040851	0.00687333			AT3G05727	AT3G05727	-1.22039	8.85944e-43	5.88944e-42
AT2G22950	ACA7	1.8618	0.00403532	0.00679404			AT2G32120	HSP70-8	-1.22029	9.08766e-14	2.92752e-13
AT2G38823	AT2G38823	1.86166	1.49334e-26	7.10479e-26			AT3G30775	POX1	-1.2201	0	0
AT1G36180	ACC2	1.86138	0	0			AT4G01820	ABCB3	-1.21908	0.00126431	0.00225036
AT1G23040	AT1G23040	1.85928	1.03267e-115	1.63213e-114			AT3G19390	AT3G19400	-1.21895	5.10305e-104	7.25529e-103
AT3G04530	PPCK2	1.85924	9.97706e-32	5.35762e-31			AT1G09930	OPT2	-1.21832	1.0583e-06	2.4039e-06
AT5G22310	AT5G22310	1.85747	8.9859e-47	6.38078e-46			AT4G01575	AT4G01575	-1.21681	8.06813e-11	2.30338e-10
AT3G29590	5MAT	1.85711	1.97133e-05	4.09881e-05			AT5G02000	AT5G02000	-1.21626	0.00776663	0.0126506
AT1G23300	AT1G23300	1.85054	0.00450327	0.00753501			AT2G36420	AT2G36420	-1.21553	3.55675e-57	2.98278e-56
AT5G03760	CSLA9	1.84973	3.2043e-217	9.41448e-216			AT5G41550	AT5G41550	-1.21453	9.30794e-21	3.77744e-20
AT3G22142	AT3G22142	1.84722	2.75119e-108	4.09799e-107			AT4G04960	LECRK71	-1.21408	4.35312e-101	6.01548e-100
AT1G10385	EXO84A	1.84634	2.09275e-06	4.65621e-06			AT4G32990	AT4G32990	-1.21362	0.00324194	0.00552177
AT2G28200	ZAT5	1.84607	1.84102e-64	1.71516e-63			AT1G68980	AT1G68980	-1.2132	1.73949e-29	8.87765e-29
AT1G51000	AT1G51000	1.84598	0.00430108	0.00721635			AT1G65850	AT1G65850	-1.21313	4.32581e-08	1.07432e-07
AT1G23120	AT1G23120	1.84584	1.06588e-70	1.0663e-69			AT5G46710	AT5G46710	-1.2126	1.67872e-68	1.63718e-67
AT5G61520	STP3	1.84509	0	0			AT2G17230	EXL5	-1.21257	1.42306e-117	2.28295e-116
AT5G43290	WRKY49	1.84468	3.10648e-10	8.61437e-10			AT5G44290	AT5G44290	-1.21161	0	0
AT5G51310	AT5G51310	1.84283	1.83446e-12	5.62928e-12			AT1G75960	AAE8	-1.21158	1.75155e-27	8.52321e-27
AT1G54200	AT1G54200	1.84183	1.02466e-33	5.76204e-33			AT1G27480	LCAT1	-1.21134	4.41165e-66	4.18772e-65
AT2G42720	AT2G42720	1.83965	8.12481e-31	4.27516e-30			AT1G65486	AT1G65486	-1.20861	1.33127e-10	3.75589e-10
AT5G55650	AT5G55650	1.83923	1.17666e-06	2.66709e-06			AT1G43670	AT1G43670	-1.20809	0	0
AT3G14020	NFYA6	1.83892	2.33587e-88	2.82956e-87			AT5G52750	AT5G52750	-1.2079	8.59758e-77	9.17409e-76
AT5G58360	OFP3	1.83762	0.000206329	0.000395521			AT1G23870	TPS9	-1.20784	0	0
AT2G32160	AT2G32160	1.83567	8.44763e-40	5.34655e-39			AT2G35637	AT2G35637	-1.2069	5.50312e-19	2.11983e-18
AT1G15960	NRAMP6	1.83494	3.70681e-130	6.59961e-129			AT3G26855	AT3G26855	-1.20683	0.0122024	0.0193348
AT3G15356	LEC	1.83489	0	0			AT1G08550	VDE1	-1.20641	1.97005e-224	6.05915e-223
AT2G41850	ADPG2	1.83437	2.18135e-07	5.1756e-07			AT3G51870	EAAC	-1.20634	1.60129e-136	3.01434e-135
AT5G39490	AT5G39490	1.83433	0.00272599	0.00468221			AT4G20362	AT4G20362	-1.20519	1.8276e-06	4.09113e-06
AT1G59660	NUP98B	1.83411	3.26363e-184	8.24598e-183			AT2G38695	AT2G38695	-1.20467	7.26481e-09	1.88195e-08
AT4G21500	AT4G21500	1.83398	1.25697e-33	7.05288e-33			AT5G23120	HCF136	-1.20447	0	0
AT1G12040	LRX1	1.8324	4.88006e-76	5.14727e-75			AT4G17250	AT4G17250	-1.20397	4.33896e-71	4.35426e-70
AT1G27890	CAF1-4	1.83211	1.24945e-05	2.63443e-05			AT5G14740	BCA2	-1.20396	0	0
AT4G19590	AT4G19590	1.83011	1.4633e-06	3.29492e-06			AT4G28703	AT4G28703	-1.20386	8.83892e-24	3.92195e-23
AT1G73175	AT1G73175	1.82957	1.50451e-05	3.15379e-05			AT1G76040	CPK29	-1.20345	3.70135e-80	4.0945e-79
AT2G23010	SCPL9	1.82918	5.32909e-52	4.12606e-51			AT5G26280	AT5G26280	-1.20323	0	0
AT5G15950	SAMDC2	1.82905	9.00823e-60	7.79699e-59			AT4G35900	FD	-1.20125	5.88928e-12	1.7701e-11
AT1G30100	NCED5	1.82746	0.000174262	0.000336088			AT3G14620	CYP72A8	-1.20094	1.24171e-101	1.728e-100
AT5G13880	AT5G13880	1.82746	1.24479e-15	4.29864e-15			AT3G30867	AT3G30867	-1.19986	0.00107592	0.00192573
AT3G44450	AT3G44450	1.82737	2.74367e-17	1.00261e-16			AT1G18200	RABA6B	-1.1994	6.83356e-44	4.60969e-43
AT1G68568	AT1G68568	1.82645	0.00332116	0.00564694			AT4G26690	GDPDL3	-1.19815	0	0
AT3G50160	AT3G50160	1.82516	0.00652216	0.0107121			AT3G47660	AT3G47660	-1.19752	0.000169863	0.000327901
AT5G24330	ATXR6	1.82498	1.67802e-25	7.77551e-25			AT1G10155	ATPP2-A10	-1.19725	0.0141277	0.0221762
AT5G53810	AT5G53810	1.82062	9.71962e-09	2.50293e-08			AT5G09260	VPS20.2	-1.19645	4.93653e-46	3.45746e-45
AT5G11440	CID5	1.82045	2.29436e-14	7.56616e-14			AT3G26690	NUDT13	-1.1963	8.92998e-50	6.66432e-49
AT4G04745	AT4G04745	1.81783	6.17407e-42	4.04862e-41			AT5G01050	LAC9	-1.19615	1.11452e-18	4.25419e-18
AT3G21020	AT3G21020	1.81743	1.37387e-08	3.51144e-08			AT4G38380	DTX45	-1.19598	1.85623e-33	1.03722e-32
AT3G22560	AT3G22560	1.81737	1.87116e-07	4.45864e-07			AT5G22660	AT5G22660	-1.1946	0.000310075	0.000584471
AT2G02850	ARPN	1.81699	3.54642e-142	6.93583e-141			AT1G74100	SOT16	-1.19426	6.18677e-198	1.64938e-196
AT2G12461	AT2G12461	1.81506	3.77514e-11	1.09398e-10			AT4G30350	AT4G30350	-1.19336	1.22188e-219	3.65709e-218
AT1G11545	XTH8	1.81475	2.89844e-266	1.11666e-264			AT3G14050	RSH2	-1.19334	4.16188e-269	1.62048e-267
AT1G78490	CYP708A3	1.81452	0	0			AT3G48115	AT3G48115	-1.19327	1.24192e-82	1.40975e-81
AT3G18217	MIR157C	1.814	2.299e-09	6.1043e-09			AT1G76090	SMT3	-1.19232	2.36326e-106	3.44996e-105
AT3G55130	ABCG19	1.81057	7.89897e-256	2.8624e-254			AT2G37940	IPCS2	-1.19147	1.77897e-158	3.87233e-157
AT3G07730	AT3G07730	1.81054	4.00131e-55	3.26165e-54			AT1G70880	AT1G70880	-1.19134	3.23262e-12	9.82674e-12
AT1G16420	AMC8	1.81027	2.08095e-06	4.63236e-06			AT2G41110	CAM2	-1.19104	5.83958e-266	2.24303e-264
AT5G39185	AT5G39185	1.80881	0.00579067	0.00956833			AT4G17090	BAM3	-1.19009	9.40747e-269	3.65735e-267
AT3G27060	TSO2	1.8082	0	0			AT2G02630	AT2G02630	-1.18962	4.30174e-08	1.06855e-07
AT4G34065	AT4G34065	1.80803	0.00481558	0.00803015			AT3G50190	AT3G50190	-1.1896	1.01191e-12	3.13145e-12
AT4G38620	MYB4	1.80705	9.45097e-156	2.01442e-154			AT2G11150	AT2G11150	-1.18945	0.000516527	0.000952524
AT1G22990	HIPP22	1.80686	3.17792e-43	2.12525e-42			AT4G11210	DIR14	-1.18915	1.18033e-08	3.02763e-08
AT2G43960	AT2G43960	1.80636	0.00546231	0.00905144			AT4G37410	CYP81F4	-1.18844	2.23731e-174	5.33705e-173
AT5G43530	AT5G43530	1.80481	1.39495e-10	3.93033e-10			AT5G07440	GDH2	-1.1877	0	0
AT1G60060	AT1G60060	1.80389	3.85549e-69	3.78458e-68			AT3G23560	ALF5	-1.18738	4.05323e-96	5.34176e-95
AT3G48510	AT3G48510	1.80295	1.39194e-08	3.55654e-08			AT5G66631	AT5G66631	-1.18692	3.97716e-07	9.28595e-07
AT3G49980	AT3G49980	1.80197	0.00225003	0.00389708			AT5G45680	FKBP13	-1.1867	2.22392e-281	9.21957e-280
AT3G53235	AT3G53235	1.80165	2.55317e-12	7.79644e-12			AT1G55980	AT1G55980	-1.18654	2.19483e-25	1.013e-24
AT3G30844	AT3G30844	1.80119	0.00731481	0.0119511			AT4G12550	AIR1	-1.18561	1.29374e-42	8.57361e-42
AT3G17790	PAP17	1.80069	1.10297e-203	3.03198e-202			AT3G48360	BT2	-1.18547	0	0
AT4G33730	AT4G33730	1.80059	1.15745e-17	4.28523e-17			AT5G65925	AT5G65925	-1.18532	2.61067e-40	1.66963e-39
AT4G01930	AT4G01930	1.8004	4.22244e-15	1.4298e-14			AT5G44578	AT5G44578	-1.18383	0.000144809	0.000280976
AT1G49470	AT1G49470	1.7996	3.87681e-57	3.24907e-56			AT5G09320	VPS9B	-1.18347	7.32694e-41	4.73552e-40
AT4G01500	NGA4	1.79953	3.76719e-06	8.22879e-06			AT5G11290	AT5G11290	-1.18343	0.00428946	0.00719739
AT5G49525	AT5G49525	1.79938	1.42517e-08	3.63891e-08			AT5G39160	GLP2A	-1.18279	1.92302e-21	7.9747e-21
AT5G26890	AT5G26890	1.79836	0.00559239	0.00925862			AT1G58370	RXF12	-1.18247	5.24148e-38	3.19883e-37
AT5G61590	ERF107	1.79808	0	0			AT1G76190	AT1G76190	-1.18228	0.000134458	0.000261486
AT5G51174	SNOR30	1.79674	0.00123868	0.00220581			AT4G18590	RPA3B	-1.18182	1.01977e-36	6.038e-36
AT1G57906	AT1G57906	1.79638	0.0051408	0.00854244			AT1G49530	GGPP6	-1.1818	2.4775e-10	6.90531e-10
AT3G14395	AT3G14395	1.79571	7.19522e-06	1.5439e-05			AT3G11090	LBD21	-1.18114	1.51185e-26	7.18887e-26
AT3G27025	AT3G27025	1.79562	1.8214e-13	5.80258e-13			AT1G27045	ATHB-54	-1.18024	0.00675005	0.0110701
AT2G29000	AT2G29000	1.79462	0.000210258	0.000402783			AT5G60310	LECRK110	-1.18013	6.15072e-07	1.42106e-06
AT4G26255	AT4G26255	1.79319	1.62792e-11	4.79669e-11			AT1G45163	AT1G45163	-1.17972	1.33173e-18	5.06439e-18
AT4G16447	AT4G16447	1.79299	1.66685e-90	2.06602e-89			AT1G64610	AT1G64610	-1.17786	3.70058e-95	4.82243e-94
AT5G09290	SAL4	1.79271	1.0239e-17	3.79904e-17			AT5G62840	AT5G62840	-1.17519	1.83714e-48	1.34287e-47
AT5G63990	SAL3	1.78981	1.38661e-170	3.24133e-169			AT1G50590	AT1G50590	-1.17507	7.89414e-11	2.25497e-10
AT1G07485	AT1G07485	1.78973	0.00238433	0.00412023			AT5G43660	AT5G43660	-1.17339	1.80219e-09	4.8131e-09
AT3G61820	AT3G61820	1.7897	1.18604e-194	3.11654e-193			AT3G23080	AT3G23080	-1.1732	5.69901e-202	1.54999e-200
AT5G07000	SOT14	1.78848	9.15608e-30	4.70758e-29			AT3G05320	AT3G05320	-1.1727	8.59498e-29	4.32365e-28
AT5G39155	AT5G39155	1.78766	0.00641496	0.0105428			AT5G60270	LECRK17	-1.1723	4.26974e-74	4.41447e-73
AT1G76420	NAC031	1.78759	3.92017e-05	7.94831e-05			AT1G73290	scpl5	-1.17127	4.71022e-06	1.02407e-05
AT5G47130	AT5G47130	1.78708	5.17553e-09	1.35014e-08			AT1G17830	AT1G17830	-1.171	5.91625e-46	4.13459e-45
AT2G26440	PME12	1.78623	2.48844e-233	8.02946e-232			AT2G05280	AT2G05280	-1.17063	0.0006286	0.00115083
AT3G53200	AtMYB27	1.78496	3.94097e-08	9.81221e-08			AT2G30360	CIPK11	-1.17032	1.57753e-49	1.17353e-48
AT5G17090	AT5G17090	1.78485	0.00105921	0.0018965			AT2G22122	AT2G22122	-1.17028	9.41974e-63	8.53961e-62
AT4G16515	RGF6	1.78382	1.6829e-39	1.05962e-38			AT5G57190	PSD2	-1.16967	9.84924e-10	2.66629e-09
AT2G44590	DRP1D	1.78382	3.31548e-14	1.08414e-13			AT1G66540	AT1G66540	-1.16943	6.56005e-05	0.00013062
AT2G43470	AT2G43470	1.78331	5.58009e-09	1.4542e-08			AT4G32020	AT4G32020	-1.16886	1.32495e-229	4.18045e-228
AT1G45010	AT1G45010	1.7821	5.92497e-26	2.77408e-25			AT1G64720	CP5	-1.16861	0	0
AT5G25190	ERF003	1.78184	6.07819e-57	5.08069e-56			AT4G32030	AT4G32030	-1.16767	4.43447e-183	1.1084e-181
AT1G67481	MIR839A	1.78161	0.0067885	0.0111288			AT5G41810	AT5G41810	-1.16708	4.60224e-99	6.24851e-98
AT2G34850	MEE25	1.78077	4.32802e-15	1.46478e-14			AT5G52100	DAPB3	-1.16668	7.05991e-107	1.03713e-105
AT1G55230	AT1G55230	1.78008	0.00300598	0.00513936			AT5G50570	SPL13B	-1.16658	7.99094e-61	7.04501e-60
AT5G26070	AT5G26070	1.77992	0.00300517	0.0051383			AT5G60900	RLK1	-1.16657	5.97407e-07	1.38074e-06
AT3G58200	AT3G58200	1.77972	3.0968e-24	1.38901e-23			AT1G65510	AT1G65510	-1.16622	4.56652e-13	1.43393e-12
AT5G65230	AtMYB53	1.77819	5.4374e-07	1.26001e-06			AT1G43250	AT1G43250	-1.16542	0.0255196	0.0386574
AT1G18810	PKS3	1.77654	7.74023e-39	4.79692e-38			AT5G22240	OFP10	-1.16524	0.00144367	0.00255487
AT2G41820	PXC3	1.77568	0	0			AT4G18340	AT4G18340	-1.16501	2.50786e-83	2.8735e-82
AT2G44670	AT2G44670	1.77242	7.61995e-169	1.76833e-167			AT2G16380	SFH7	-1.16413	1.74687e-100	2.40487e-99
AT2G43870	AT2G43870	1.76716	6.62964e-18	2.47236e-17			AT2G20562	AT2G20562	-1.16317	9.68909e-11	2.75327e-10
AT3G53370	S1FA1	1.76636	2.50343e-126	4.33951e-125			AT1G05540	AT1G05540	-1.16274	0.0073567	0.012016
AT5G63240	AT5G63240	1.7644	0.00311835	0.0053226			AT2G26860	AT2G26860	-1.16234	3.76404e-37	2.25209e-36
AT2G20570	GLK1	1.76418	0	0			AT2G29180	AT2G29180	-1.16232	1.60109e-39	1.00935e-38
AT2G40100	LHCB4.3	1.76331	5.32447e-248	1.85849e-246			AT3G49290	ABIL2	-1.16167	2.1788e-70	2.17287e-69
AT5G24655	LSU4	1.76279	6.6012e-07	1.52102e-06			AT3G02060	AT3G02060	-1.15994	1.05944e-134	1.95978e-133
AT3G49620	DIN11	1.76021	6.0805e-218	1.79887e-216			AT5G61900	BON1	-1.15957	4.24644e-08	1.05512e-07
AT5G02750	SGR9	1.75919	5.99306e-22	2.52828e-21			AT2G41480	PER25	-1.15935	1.35186e-64	1.26219e-63
AT1G04920	SPS3	1.75914	3.09075e-74	3.20328e-73			AT1G66090	AT1G66090	-1.15915	2.0954e-47	1.50418e-46
AT4G11880	AGL14	1.75841	3.04548e-24	1.36622e-23			AT5G15350	ENODL17	-1.15897	1.94759e-242	6.58277e-241
AT1G56170	NFYC2	1.75837	9.24133e-61	8.13618e-60			AT4G25580	AT4G25580	-1.15788	8.72265e-49	6.39778e-48
AT4G25220	RHS15	1.75771	1.543e-32	8.4451e-32			AT5G50950	FUM2	-1.15772	6.42384e-84	7.41012e-83
AT1G10370	GSTU17	1.7574	2.14088e-81	2.39308e-80			AT5G04810	PPR4	-1.15672	0	0
AT1G12670	AT1G12670	1.75725	0.00839777	0.0136068			AT2G18090	AT2G18090	-1.15366	9.22377e-283	3.84875e-281
AT2G43270	AT2G43270	1.75582	0.00422542	0.00709634			AT2G48121	AT2G48121	-1.15305	0.00549094	0.00909595
AT1G30870	PER7	1.75576	2.32653e-91	2.92042e-90			AT4G24972	TPD1	-1.15257	3.30152e-53	2.61791e-52
AT5G39995	AT5G39995	1.75549	0.000877349	0.00158383			AT3G12830	SAUR72	-1.1521	5.16358e-33	2.8622e-32
AT2G46680	ATHB-7	1.754	3.70206e-88	4.48025e-87			AT1G72210	BHLH96	-1.15163	1.63297e-11	4.81103e-11
AT3G49760	AtbZIP5	1.75363	5.42841e-10	1.48696e-09			AT2G25450	GSL-OH	-1.15148	0	0
AT5G60060	AT5G60060	1.75261	4.59905e-05	9.27413e-05			AT2G07680	ATMRP11	-1.14994	1.06215e-60	9.33525e-60
AT1G70840	MLP31	1.75138	0.00536548	0.00890021			AT1G29920	LHCB1.2	-1.14926	1.35993e-197	3.618e-196
AT5G51440	HSP23.5	1.75059	4.17111e-71	4.1891e-70			AT1G56250	VBF	-1.14925	1.28228e-15	4.42689e-15
AT5G28300	AT5G28300	1.75041	1.15349e-126	2.00628e-125			AT3G55050	PP2C6	-1.14915	6.79465e-97	8.99633e-96
AT4G00210	LBD31	1.74926	0.00355514	0.00602638			AT1G73885	AT1G73885	-1.1473	2.21065e-142	4.33004e-141
AT5G51950	AT5G51950	1.74906	0.00829259	0.0134449			AT5G39190	GLP5A	-1.14697	1.96872e-39	1.23806e-38
AT3G02000	GRXC7	1.7483	1.06322e-18	4.06017e-18			AT4G21850	MSRB9	-1.14696	0	0
AT2G25000	WRKY60	1.74817	5.74161e-97	7.606e-96			AT2G31380	BBX25	-1.14617	2.70092e-11	7.88397e-11
AT5G61650	CYCU4-3	1.7481	1.72083e-13	5.48695e-13			AT1G15180	AT1G15180	-1.14581	6.59933e-147	1.33445e-145
AT3G60140	BGLU30	1.74807	1.03202e-85	1.21789e-84			AT1G42990	BZIP60	-1.14576	1.30123e-121	2.16056e-120
AT2G42320	AT2G42320	1.74789	0	0			AT2G35760	AT2G35760	-1.14502	1.97508e-37	1.18783e-36
AT1G68765	IDA	1.74723	3.40566e-05	6.93737e-05			AT4G18050	ABCB9	-1.14399	3.6252e-39	2.2642e-38
AT5G06510	NFYA10	1.74627	6.22449e-21	2.54219e-20			AT5G47230	ERF5	-1.14392	4.71123e-53	3.72536e-52
AT4G29240	AT4G29240	1.74613	2.38601e-80	2.64401e-79			AT2G29720	CTF2B	-1.14326	2.58173e-40	1.65194e-39
AT5G40010	AATP1	1.74599	9.62248e-16	3.33281e-15			AT5G08050	AT5G08050	-1.14293	1.03694e-68	1.01321e-67
AT4G28530	anac074	1.74542	1.96817e-16	6.98787e-16			AT5G59570	BOA	-1.14214	5.21658e-91	6.50676e-90
AT3G51380	IQD20	1.74329	2.36769e-06	5.2506e-06			AT2G37470	AT2G37470	-1.14189	4.16368e-56	3.44441e-55
AT5G06720	PER53	1.74178	6.6865e-38	4.07004e-37			AT4G23810	WRKY53	-1.14066	8.48595e-30	4.36742e-29
AT5G18560	ERF086	1.74169	0.000107028	0.000209636			AT5G58480	AT5G58480	-1.14053	1.83493e-59	1.58073e-58
AT5G06490	ATL71	1.74169	0.00379365	0.00640905			AT3G02510	AT3G02510	-1.13932	6.29543e-30	3.25179e-29
AT1G27020	AT1G27020	1.74168	0	0			AT4G01915	AT4G01915	-1.13923	9.46633e-37	5.61146e-36
AT3G62730	AT3G62730	1.74167	1.52347e-07	3.65256e-07			AT3G29776	AT3G29776	-1.13921	3.26007e-14	1.0663e-13
AT1G19115	AT1G19115	1.74135	3.87047e-09	1.01569e-08			AT5G08310	AT5G08310	-1.13737	5.37197e-15	1.81283e-14
AT4G12270	AT4G12270	1.74126	4.00626e-10	1.10497e-09			AT1G27360	SPL11	-1.13714	1.80689e-25	8.36058e-25
AT3G52060	AT3G52060	1.74093	0	0			AT3G01430	AT3G01430	-1.13682	2.28272e-46	1.60669e-45
AT5G65640	BHLH93	1.73943	0	0			AT1G32460	AT1G32460	-1.13664	1.80267e-145	3.61947e-144
AT1G32570	AT1G32570	1.7391	4.14219e-08	1.02992e-07			AT4G08500	MEKK1	-1.13659	5.71374e-161	1.26522e-159
AT4G37810	EPFL2	1.73899	2.91346e-19	1.1301e-18			AT3G26922	AT3G26922	-1.13656	3.13507e-12	9.54151e-12
AT2G45780	AT2G45780	1.73784	3.70191e-07	8.65671e-07			AT5G66900	AT5G66900	-1.13623	4.57401e-134	8.37642e-133
AT5G38790	AT5G38790	1.73743	6.7313e-08	1.65267e-07			AT1G72430	AT1G72430	-1.13575	6.34286e-99	8.57994e-98
AT2G09187	AT2G09187	1.73742	0.00950622	0.0152743			AT2G05920	AT2G05920	-1.13568	0	0
AT2G02380	GSTZ2	1.73647	1.1328e-10	3.20582e-10			AT1G55152	AT1G55152	-1.13414	1.60206e-90	1.98764e-89
AT2G18150	PER15	1.73583	1.31409e-93	1.69096e-92			AT3G27860	AT3G27860	-1.13365	0.000487307	0.000900454
AT2G03520	UPS4	1.73576	4.38866e-06	9.55613e-06			AT1G77145	AT1G77145	-1.13341	1.33224e-12	4.10684e-12
AT4G35263	AT4G35263	1.73576	0.00935032	0.015037			AT3G01820	AT3G01820	-1.13339	2.97903e-63	2.72874e-62
AT4G23150	CRK7	1.73553	1.45396e-06	3.27449e-06			AT3G28290	AT14A	-1.13324	3.47321e-27	1.68243e-26
AT5G46690	BHLH71	1.73553	8.11838e-109	1.21704e-107			AT5G46910	AT5G46910	-1.13241	3.30949e-57	2.77633e-56
AT3G44220	AT3G44220	1.73269	1.45634e-14	4.83434e-14			AT1G72930	TIR	-1.13152	3.24778e-136	6.09137e-135
AT1G02205	CER1	1.73234	2.90085e-113	4.49878e-112			AT1G03600	PSB27-1	-1.13099	3.76748e-45	2.60099e-44
AT2G41090	CML10	1.73057	0	0			AT5G59720	HSP18.1	-1.13087	0.00150929	0.00266574
AT2G19660	AT2G19660	1.73057	1.07217e-22	4.61664e-22			AT4G13900	AtRLP49	-1.12956	1.86847e-06	4.17642e-06
AT3G22968	CPuORF59	1.72934	0.00351896	0.00596702			AT5G51720	NEET	-1.12917	1.48525e-94	1.9228e-93
AT4G03965	AT4G03965	1.72931	1.25924e-11	3.73054e-11			AT4G11230	RBOHI	-1.12904	3.33561e-09	8.78244e-09
AT5G60460	AT5G60460	1.72929	1.09626e-33	6.1633e-33			AT2G41460	ARP	-1.12821	1.03663e-27	5.07613e-27
AT5G10580	AT5G10580	1.72892	1.03996e-142	2.04638e-141			AT4G33610	AT4G33610	-1.12691	1.79399e-17	6.60088e-17
AT5G55620	AT5G55620	1.72829	3.34759e-189	8.61097e-188			AT5G05690	CYP90A1	-1.12641	7.28214e-237	2.39805e-235
AT1G68240	BHLH109	1.72803	0.000260441	0.000494259			AT5G04780	PCMP-H16	-1.12616	1.50181e-17	5.53618e-17
AT2G33240	XI-D	1.72774	3.37374e-42	2.22485e-41			AT1G70630	AT1G70630	-1.12586	4.38004e-15	1.4818e-14
AT3G06360	AGP27	1.72718	3.00077e-14	9.83998e-14			AT3G20500	PAP18	-1.1257	2.46316e-155	5.23703e-154
AT3G44770	AT3G44770	1.72685	1.98245e-13	6.30857e-13			AT1G08610	AT1G08610	-1.12533	1.65577e-39	1.04279e-38
AT5G66562	AT5G66562	1.72659	0.0032886	0.00559641			AT5G15760	AT5G15760	-1.1253	6.43289e-14	2.08305e-13
AT1G25530	AT1G25530	1.72537	6.78249e-136	1.26745e-134			AT5G52760	AT5G52760	-1.12497	3.93726e-09	1.03279e-08
AT1G80920	ATJ8	1.72536	0	0			AT5G47900	AT5G47900	-1.12423	2.50225e-47	1.79272e-46
AT4G24780	AT4G24780	1.7253	0	0			AT3G47650	AT3G47650	-1.12403	9.55083e-261	3.56694e-259
AT2G45900	AT2G45900	1.7242	2.30232e-52	1.79396e-51			AT1G18710	AtMYB47	-1.12393	7.28264e-20	2.87756e-19
AT5G03020	AT5G03020	1.72413	8.61543e-07	1.96867e-06			AT3G21870	CYCU1-1	-1.12299	1.24072e-26	5.91833e-26
AT1G01670	PUB56	1.72327	8.64527e-32	4.65026e-31			AT2G26215	AT2G26215	-1.12291	2.67543e-07	6.30934e-07
AT3G62380	AT3G62380	1.72249	0.00285857	0.00489844			AT1G58270	ZW9	-1.12153	4.64816e-271	1.82088e-269
AT4G16820	PLA-I{beta]2	1.72143	3.73775e-09	9.81865e-09			AT5G61410	RPE	-1.12142	0	0
AT3G10000	EDA31	1.72091	4.04016e-08	1.00523e-07			AT4G33960	AT4G33960	-1.1208	1.05901e-23	4.68758e-23
AT1G68750	PPC4	1.72091	0.00627653	0.0103298			AT1G72790	AT1G72790	-1.12053	8.63315e-63	7.83497e-62
AT1G32860	AT1G32860	1.72022	6.8479e-112	1.04993e-110			AT2G46650	CYTB5-C	-1.12016	4.22299e-89	5.15205e-88
AT2G07736	AT2G07736	1.71992	0.00773487	0.0126029			AT2G30600	AT2G30600	-1.12	0	0
AT5G42780	ZHD13	1.71902	1.37094e-51	1.05444e-50			AT5G60540	PDX2	-1.11988	7.73661e-145	1.54491e-143
AT1G06030	AT1G06030	1.71873	0.00140179	0.00248367			AT1G21326	AT1G21326	-1.11933	2.69552e-18	1.01587e-17
AT3G03820	AT3G03820	1.71801	3.25305e-16	1.14624e-15			AT5G44490	AT5G44490	-1.11919	7.17599e-15	2.40703e-14
AT4G14270	CID2	1.71754	0	0			AT5G56380	AT5G56380	-1.11878	5.445e-56	4.50003e-55
AT5G39865	AT5G39865	1.71749	1.83733e-12	5.63741e-12			AT4G13505	AT4G13505	-1.11795	5.63763e-05	0.000112876
AT3G28007	SWEET4	1.71717	5.76431e-21	2.35612e-20			AT5G16790	THO7A	-1.11686	3.21633e-06	7.06165e-06
AT1G05990	CML7	1.71608	0.000142501	0.000276603			AT1G53163	AT1G53163	-1.11633	0.00129457	0.00230133
AT5G15100	PIN5	1.716	0.0106865	0.0170745			AT2G43320	AT2G43320	-1.11621	1.19126e-52	9.34193e-52
AT4G03292	AT4G03292	1.71334	0.00216222	0.00375185			AT5G64380	AT5G64380	-1.11608	3.95029e-84	4.58779e-83
AT5G49690	UGT91C1	1.71238	6.45644e-20	2.55387e-19			AT4G17970	ALMT12	-1.11585	3.53809e-79	3.88039e-78
AT3G25717	RTFL16	1.71001	1.99585e-75	2.09136e-74			AT2G38780	AT2G38780	-1.11488	4.8633e-64	4.49811e-63
AT1G02340	HFR1	1.70868	6.94467e-42	4.54929e-41			AT5G01830	PUB16	-1.11475	6.50498e-23	2.81468e-22
AT3G18400	anac058	1.70812	5.182e-36	3.03597e-35			AT4G13550	AT4G13550	-1.11459	6.9395e-72	7.03561e-71
AT1G26960	ATHB-23	1.70804	1.31623e-95	1.7249e-94			AT2G23560	MES7	-1.1143	2.61633e-06	5.78847e-06
AT1G72620	AT1G72620	1.70694	2.2459e-15	7.68019e-15			AT5G62460	AT5G62460	-1.11411	1.2533e-66	1.19723e-65
AT5G45650	AT5G45650	1.70504	5.17421e-79	5.66026e-78			AT5G23330	RIBF1	-1.11184	8.4164e-39	5.21093e-38
AT4G19170	CCD4	1.70482	6.53673e-180	1.60721e-178			AT3G23920	BAM1	-1.11095	1.75847e-276	7.06144e-275
AT1G69240	MES15	1.70441	1.13343e-19	4.44626e-19			AT5G57400	AT5G57400	-1.11083	0.00129713	0.00230524
AT4G21760	BGLU47	1.70156	6.19047e-13	1.93249e-12			AT2G06530	VPS2.1	-1.11071	2.84245e-107	4.1949e-106
AT4G10720	AT4G10720	1.70127	6.89158e-05	0.000136965			AT1G08980	AMI1	-1.11033	6.72797e-302	3.00297e-300
AT3G22970	AT3G22970	1.70105	4.35001e-15	1.47203e-14			AT1G03470	NET3A	-1.11002	9.4229e-63	8.53961e-62
AT3G47540	AT3G47540	1.70099	3.72779e-65	3.50609e-64			AT1G68110	AT1G68110	-1.10996	5.43167e-06	1.17583e-05
AT4G00130	AT4G00130	1.70087	0.0109037	0.0173998			AT3G04010	AT3G04010	-1.10917	1.18284e-21	4.9396e-21
AT4G09500	UGT79B7	1.69929	6.53517e-45	4.49479e-44			AT4G25910	NIFU3	-1.10824	7.29948e-105	1.04652e-103
AT1G50720	AT1G50720	1.69915	0.00641398	0.0105418			AT1G68690	PERK9	-1.10802	2.30173e-68	2.24137e-67
AT3G47380	AT3G47380	1.69857	3.01346e-22	1.28439e-21			AT5G02940	AT5G02940	-1.10783	2.88186e-211	8.23113e-210
AT1G17480	IQD7	1.69788	3.08786e-36	1.81322e-35			AT2G14170	ALDH6B2	-1.10777	0	0
AT5G65170	AT5G65170	1.69725	1.37726e-56	1.14749e-55			AT1G45230	AT1G45230	-1.10718	8.34474e-112	1.27866e-110
AT1G23350	AT1G23350	1.69714	0.00142083	0.00251653			AT3G22260	AT3G22260	-1.10629	1.38914e-41	9.06283e-41
AT5G23940	DCR	1.69482	4.59948e-218	1.36387e-216			AT3G49055	AT3G49055	-1.10593	0.00787025	0.0128063
AT3G05650	AtRLP32	1.6943	1.42204e-25	6.59774e-25			AT4G18530	AT4G18530	-1.10489	1.44273e-51	1.10899e-50
AT1G64910	UGT79B10	1.69264	2.99422e-07	7.04297e-07			AT5G45310	AT5G45310	-1.10482	1.12629e-18	4.29718e-18
AT1G62370	AT1G62370	1.69168	1.20139e-33	6.74846e-33			AT2G01590	CRR3	-1.10423	8.11009e-62	7.24984e-61
AT5G47920	AT5G47920	1.69098	1.47474e-19	5.76838e-19			AT2G29310	AT2G29310	-1.10368	2.7534e-93	3.53595e-92
AT2G41070	DPBF4	1.68992	6.65962e-142	1.29946e-140			AT4G38545	AT4G38545	-1.10334	0.00318588	0.00543098
AT5G54020	AT5G54020	1.68826	3.04604e-17	1.11093e-16			AT1G35210	AT1G35210	-1.10313	1.76068e-19	6.87316e-19
AT4G20190	AT4G20190	1.6878	0.000151205	0.000292921			AT4G35440	CLC-E	-1.1027	5.58747e-112	8.57706e-111
AT5G05500	AT5G05500	1.68752	5.70277e-42	3.7434e-41			AT5G37490	PUB21	-1.10194	0.000599558	0.00109978
AT4G34860	INVB	1.68543	2.38809e-258	8.79064e-257			AT5G38280	PR5K	-1.10174	4.23973e-39	2.64351e-38
AT2G44390	AT2G44390	1.68505	6.02131e-05	0.000120267			AT5G14570	NRT2.7	-1.10099	5.10931e-30	2.64445e-29
AT5G58780	AT5G58780	1.684	5.10272e-09	1.33142e-08			AT3G14770	SWEET2	-1.10023	1.50364e-22	6.45605e-22
AT2G19780	AT2G19780	1.68057	1.11761e-35	6.50752e-35			AT5G01015	AT5G01015	-1.10022	1.45633e-05	3.05678e-05
AT3G54580	AT3G54580	1.68026	1.10922e-27	5.42747e-27			AT5G22520	AT5G22520	-1.10021	8.34252e-06	1.78143e-05
AT5G54400	AT5G54400	1.67927	2.00931e-10	5.62361e-10			AT1G58070	AT1G58070	-1.10018	2.0576e-17	7.55349e-17
AT5G52390	AT5G52390	1.67894	2.52884e-08	6.37624e-08			AT1G21010	AT1G21010	-1.09987	4.84945e-79	5.30725e-78
AT2G27870	AT2G27870	1.6783	0.0117362	0.0186411			AT1G30757	AT1G30757	-1.0998	2.37489e-17	8.70329e-17
AT5G14690	AT5G14690	1.67763	8.49341e-31	4.46728e-30			AT4G38470	AT4G38470	-1.09952	1.38828e-221	4.2092e-220
AT4G14020	AT4G14020	1.67756	2.87732e-125	4.9375e-124			AT2G37540	AT2G37540	-1.09906	3.73026e-117	5.95819e-116
AT5G46540	ABCB7	1.67637	0.0118211	0.0187667			AT2G05620	PGR5	-1.09894	1.34734e-134	2.48873e-133
AT1G52400	BGLU18	1.67587	0	0			AT3G58820	AT3G58820	-1.09882	1.96052e-17	7.20225e-17
AT3G48630	AT3G48630	1.67515	0.0112397	0.017898			AT3G13450	DIN4	-1.09869	1.8856e-233	6.09194e-232
AT3G28155	AT3G28155	1.67508	1.9611e-07	4.66686e-07			AT2G24330	AT2G24330	-1.09867	6.50201e-63	5.91974e-62
AT3G60650	AT3G60650	1.67498	1.77206e-10	4.96937e-10			AT2G43120	AT2G43120	-1.09858	2.20614e-48	1.60846e-47
AT1G49800	AT1G49800	1.67386	0.0111175	0.0177156			AT1G05260	PER3	-1.09844	2.10316e-44	1.43192e-43
AT5G67400	PER73	1.67359	2.92353e-128	5.13019e-127			AT1G61660	BHLH112	-1.09839	1.12313e-165	2.56458e-164
AT3G43930	AT3G43930	1.67357	7.29205e-07	1.67449e-06			AT1G03090	MCCA	-1.09823	0	0
AT3G13855	U6-26	1.67339	0.0104381	0.0166984			AT3G29120	AT3G29120	-1.0981	4.70311e-21	1.92728e-20
AT4G21380	SD18	1.67285	6.48306e-39	4.02755e-38			AT3G51960	ATBZIP24	-1.09787	1.1286e-12	3.48749e-12
AT2G13410	AT2G13410	1.67257	3.7268e-05	7.56702e-05			AT4G23271	AT4G23271	-1.09768	0.00182074	0.00318565
AT4G26560	CBL7	1.67173	0.0109533	0.0174749			AT1G61260	AT1G61260	-1.09727	1.14047e-38	7.0424e-38
AT1G22760	PAB3	1.67173	0.0128272	0.0202623			AT1G55320	AAE18	-1.09624	4.27755e-26	2.00936e-25
AT3G10710	PME24	1.6716	6.7828e-46	4.73761e-45			AT2G29065	SCL34	-1.09525	5.95799e-24	2.65237e-23
AT5G43860	CLH2	1.67099	1.77264e-38	1.0925e-37			AT1G27110	AT1G27110	-1.09459	2.84411e-05	5.83863e-05
AT3G09440	HSP70-3	1.66985	0	0			AT2G37030	AT2G37030	-1.09401	0.00728083	0.0118994
AT1G58007	AT1G58007	1.66979	9.00454e-08	2.19106e-07			AT5G60100	APRR3	-1.09362	3.98974e-219	1.18996e-217
AT1G21310	EXT3	1.66977	2.15922e-46	1.52059e-45			AT4G32060	AT4G32060	-1.09284	0	0
AT1G34245	EPF2	1.66951	1.68809e-15	5.80367e-15			AT3G28300	AT14A	-1.09194	9.68e-27	4.62776e-26
AT3G01730	AT3G01730	1.66779	0.00855467	0.0138462			AT1G71697	CK1	-1.09181	1.19625e-63	1.09967e-62
AT1G53640	AT1G53640	1.6676	2.85164e-06	6.2944e-06			AT1G23310	GGAT1	-1.09141	0	0
AT1G49570	PER10	1.66726	2.44211e-168	5.64682e-167			AT1G15885	AT1G15885	-1.09098	2.08613e-11	6.125e-11
AT3G62950	GRXC11	1.6668	3.10909e-72	3.15965e-71			AT3G04450	AT3G04450	-1.08919	5.49525e-40	3.48831e-39
AT1G69160	AT1G69160	1.66562	2.58101e-111	3.94308e-110			AT1G80120	AT1G80120	-1.08898	1.38483e-13	4.42719e-13
AT4G22900	AT4G22900	1.66536	4.51138e-11	1.30218e-10			AT1G35350	PHO1-H8	-1.08886	4.50328e-67	4.32275e-66
AT1G17960	AT1G17960	1.66495	1.38473e-61	1.23312e-60			AT2G05160	AT2G05160	-1.08869	2.26806e-29	1.15522e-28
AT1G07370	PCNA	1.66435	4.2583e-112	6.54062e-111			AT4G39940	APK2	-1.08811	3.90271e-98	5.24043e-97
AT3G57380	AT3G57380	1.66296	7.48209e-31	3.94102e-30			AT1G16820	AT1G16820	-1.08763	9.48956e-09	2.44516e-08
AT1G30080	AT1G30080	1.6629	5.45382e-36	3.1923e-35			AT1G59840	CCB4	-1.08689	3.54433e-97	4.70496e-96
AT4G21200	GA2OX8	1.66289	1.3189e-18	5.01711e-18			AT1G64600	AT1G64600	-1.08649	1.06708e-36	6.31666e-36
AT5G17500	AT5G17500	1.66259	0.00448327	0.00750482			AT4G20230	TPS09	-1.0863	6.81725e-05	0.000135614
AT5G22500	FAR1	1.66232	1.21539e-159	2.67281e-158			AT5G43170	AZF3	-1.08563	3.90176e-20	1.55536e-19
AT3G61900	AT3G61900	1.66121	1.09367e-10	3.09851e-10			AT4G31550	WRKY11	-1.08563	6.43253e-168	1.48336e-166
AT1G66870	AT1G66870	1.66099	0.012205	0.0193377			AT1G64200	VHA-E3	-1.08527	3.5658e-40	2.27367e-39
AT3G12540	AT3G12540	1.66098	6.04781e-13	1.88888e-12			AT2G33600	AT2G33600	-1.08515	3.19377e-53	2.53404e-52
AT1G73870	COL7	1.66079	1.47046e-06	3.31019e-06			AT5G62620	B3GALT19	-1.08328	2.78621e-87	3.34658e-86
AT3G01530	MYB57	1.6593	0.0112039	0.0178444			AT5G57640	AT5G57640	-1.08262	7.35498e-21	2.99578e-20
AT2G39310	JAL22	1.65907	0	0			AT4G17810	AT4G17810	-1.08258	1.62637e-27	7.92308e-27
AT1G69630	FBL13	1.65866	0.00537791	0.00891967			AT5G44070	PCS1	-1.08245	1.08617e-299	4.80618e-298
AT2G45650	AGL6	1.6578	0.0097341	0.0156268			AT3G14517	AT3G14517	-1.08198	0.000363064	0.000680147
AT3G60540	AT3G60540	1.65743	8.01405e-13	2.49175e-12			AT1G06475	AT1G06475	-1.08129	8.64708e-10	2.34854e-09
AT1G03820	AT1G03820	1.65734	2.69053e-112	4.13755e-111			AT5G62680	NPF2.11	-1.08102	0	0
AT2G36750	UGT73C1	1.65637	3.18964e-05	6.51663e-05			AT1G77060	AT1G77060	-1.08092	2.40933e-122	4.02655e-121
AT1G50110	BCAT6	1.65592	5.51735e-103	7.771e-102			AT4G27720	AT4G27720	-1.0809	4.87681e-157	1.04995e-155
AT1G34140	PAB1	1.6558	0.000110939	0.000216949			AT3G62460	AT3G62460	-1.08039	1.71438e-32	9.37713e-32
AT1G62980	EXPA18	1.6555	1.19859e-36	7.08696e-36			AT5G55120	VTC5	-1.08017	2.40961e-97	3.21197e-96
AT2G03821	AT2G03821	1.65321	0.00895581	0.0144489			AT3G63370	OTP86	-1.08013	1.76531e-43	1.18613e-42
AT2G15810	AT2G15810	1.65298	8.00974e-10	2.17798e-09			AT3G16720	ATL2	-1.07952	1.02621e-104	1.46553e-103
AT2G35340	MEE29	1.65222	7.18085e-125	1.23059e-123			AT1G78780	AT1G78780	-1.07931	8.03023e-31	4.228e-30
AT2G29165	AT2G29165	1.65208	0.000749653	0.00136262			AT5G58670	PLC1	-1.07841	3.39464e-24	1.52153e-23
AT5G20150	SPX1	1.65206	1.12504e-158	2.45726e-157			AT3G06850	BCE2	-1.07823	5.12541e-240	1.71427e-238
AT3G20460	AT3G20460	1.65187	1.29226e-11	3.82526e-11			AT5G26730	AT5G26730	-1.0781	0.00989646	0.0158745
AT3G46810	AT3G46810	1.65103	3.91604e-09	1.02744e-08			AT4G35250	AT4G35250	-1.07661	1.35113e-186	3.4478e-185
AT4G13990	AT4G13990	1.65077	8.69967e-63	7.89255e-62			AT1G52870	AT1G52870	-1.07653	9.86845e-246	3.38914e-244
AT2G39350	ABCG1	1.65012	4.16405e-235	1.35384e-233			AT4G31248	AT4G31248	-1.07643	1.07851e-05	2.2834e-05
AT4G34900	XDH2	1.64817	7.29995e-134	1.33494e-132			AT3G15250	AT3G15250	-1.07636	0.020597	0.0316326
AT4G26390	AT4G26390	1.64757	0.00466024	0.00778521			AT1G64900	CYP89A2	-1.07583	5.99053e-59	5.13302e-58
AT4G18980	AtS40-3	1.6466	0.0018917	0.00330454			AT3G26650	GAPA1	-1.07573	0	0
AT3G17580	AT3G17580	1.64606	3.56392e-07	8.34469e-07			AT2G29490	GSTU1	-1.07553	3.10648e-48	2.26038e-47
AT2G11320	AT2G11320	1.64561	0.0110309	0.0175874			AT1G65230	AT1G65230	-1.07437	1.42355e-136	2.68171e-135
AT5G52310	LTI78	1.64505	0	0			AT3G62590	AT3G62590	-1.07321	1.59759e-12	4.91299e-12
AT2G02950	PKS1	1.64478	1.6854e-119	2.74682e-118			AT4G14630	GLP9	-1.07281	5.79004e-19	2.22801e-18
AT1G70510	KNAT2	1.64401	6.60208e-19	2.53553e-18			AT1G17410	AT1G17410	-1.0726	4.54964e-31	2.4088e-30
AT1G26770	EXPA10	1.64158	2.30307e-131	4.13197e-130			AT1G11180	SCAMP5	-1.07247	4.48973e-60	3.90451e-59
AT3G19310	AT3G19310	1.64095	0.00323593	0.0055119			AT5G66550	AT5G66550	-1.07179	8.683e-49	6.37052e-48
AT1G13600	AtbZIP58	1.64075	0.000326073	0.000613272			AT2G17705	AT2G17705	-1.07169	1.08652e-47	7.84569e-47
AT3G11180	AT3G11180	1.64053	0.0146836	0.0229975			AT4G17483	AT4G17483	-1.07145	1.44397e-05	3.03135e-05
AT1G24095	AT1G24095	1.6402	2.52936e-36	1.48799e-35			AT1G17240	RLP2	-1.07111	0.00408484	0.00687333
AT4G18350	NCED2	1.63975	0.00015354	0.000297309			AT1G22885	AT1G22885	-1.07097	2.45304e-64	2.28202e-63
AT5G34868	AT5G34868	1.63772	0.000699226	0.00127403			AT5G21930	PAA2	-1.07095	0	0
AT1G69690	TCP15	1.63701	8.03629e-91	1.00044e-89			AT5G53580	PLR1	-1.07087	1.73397e-179	4.25114e-178
AT5G39473	AT5G39473	1.63689	0.00774483	0.0126167			AT3G06510	SFR2	-1.07052	1.2149e-258	4.49146e-257
AT3G58810	MTPA2	1.63683	1.09873e-32	6.04194e-32			AT2G40710	AT2G40710	-1.0696	0.0126757	0.0200401
AT1G28390	AT1G28390	1.63639	4.60041e-90	5.67738e-89			AT1G65240	AT1G65240	-1.06954	1.55902e-05	3.26564e-05
AT2G21930	AT2G21930	1.63591	0.0110159	0.0175668			AT3G03855	AT3G03855	-1.0695	1.05329e-18	4.02287e-18
AT2G45450	ZPR1	1.63555	7.7423e-47	5.50229e-46			AT3G47080	AT3G47080	-1.06882	4.55729e-96	6.00297e-95
AT5G67430	AT5G67430	1.63424	1.90063e-13	6.05197e-13			AT3G57180	BPG2	-1.06865	1.3206e-61	1.17683e-60
AT5G08260	SCPL35	1.63281	0	0			AT5G01540	LECRK62	-1.06848	5.68823e-25	2.60006e-24
AT2G28790	AT2G28790	1.63256	6.67522e-93	8.52963e-92			AT1G72610	GLP1	-1.06846	1.05378e-07	2.55251e-07
AT3G58190	LBD29	1.63177	9.51202e-05	0.000187071			AT4G16563	AT4G16563	-1.06824	3.01717e-132	5.43982e-131
AT3G08660	AT3G08660	1.63145	2.68818e-06	5.9428e-06			AT5G08650	AT5G08650	-1.06798	2.3649e-251	8.3802e-250
AT5G13180	ANAC083	1.63123	0	0			AT3G48200	AT3G48200	-1.06703	0	0
AT4G24415	MIR824A	1.6308	1.64115e-44	1.11915e-43			AT2G43900	5PTASE12	-1.06696	3.31734e-154	7.01239e-153
AT4G15440	CYP74B2	1.62993	6.36357e-13	1.98532e-12			AT5G61210	SNAP33	-1.06681	3.23092e-284	1.35922e-282
AT1G18400	BEE1	1.62937	3.97053e-24	1.77469e-23			AT1G16170	AT1G16170	-1.06548	4.04377e-71	4.0628e-70
AT1G63910	AtMYB103	1.62778	0.0033173	0.00564114			AT4G25170	AT4G25170	-1.06517	6.73274e-186	1.71294e-184
AT1G16500	AT1G16500	1.62752	1.18596e-64	1.1081e-63			AT1G21680	AT1G21680	-1.06442	4.02597e-273	1.60163e-271
AT3G04510	LSH2	1.62745	0.000645229	0.00117959			AT4G38225	AT4G38225	-1.06436	2.70674e-128	4.75629e-127
AT3G29636	AT3G29636	1.62694	0.0147365	0.0230776			AT1G22530	PATL2	-1.06298	5.58151e-224	1.70846e-222
AT1G11482	AT1G11482	1.62637	0.000322963	0.0006076			AT2G39470	PNSL1	-1.06221	5.27845e-220	1.58353e-218
AT1G17180	GSTU25	1.6261	1.15099e-115	1.81691e-114			AT3G05625	AT3G05625	-1.06198	1.2266e-23	5.41725e-23
AT1G26250	AT1G26250	1.62569	7.89465e-17	2.83756e-16			AT3G11560	AT3G11560	-1.06185	0	0
AT5G40790	AT5G40790	1.62528	0.0124819	0.0197521			AT1G06690	AT1G06690	-1.06178	1.71955e-82	1.94589e-81
AT1G75780	TUBB1	1.62501	3.70945e-156	7.93289e-155			AT1G57770	AT1G57770	-1.0617	5.37912e-218	1.59321e-216
AT3G28570	AT3G28570	1.62281	7.42538e-05	0.000147163			AT1G29590	eIF4E3	-1.06167	4.056e-10	1.11832e-09
AT3G12520	SULTR4	1.62204	6.13536e-183	1.53056e-181			AT4G36650	ATPBRP	-1.06029	3.26166e-79	3.57875e-78
AT5G44260	AT5G44260	1.62128	9.03347e-63	8.19248e-62			AT1G02060	AT1G02060	-1.05957	1.96977e-39	1.23842e-38
AT1G14630	AT1G14630	1.6204	9.32888e-48	6.74586e-47			AT2G10931	AT2G10931	-1.05874	1.70177e-09	4.55251e-09
AT5G43175	BHLH139	1.61981	0.00386395	0.00651977			AT5G48570	FKBP65	-1.05806	4.19733e-16	1.47228e-15
AT4G11950	AT4G11950	1.61964	1.9045e-05	3.96372e-05			AT2G35660	CTF2A	-1.05805	8.45982e-37	5.01947e-36
AT1G15125	AT1G15125	1.61669	0	0			AT5G52070	AT5G52070	-1.05733	6.28028e-30	3.24462e-29
AT5G62210	AT5G62210	1.61616	1.01543e-40	6.53325e-40			AT1G74440	AT1G74440	-1.05688	6.37485e-24	2.83696e-23
AT2G36500	CBSCBSPB2	1.61523	5.21137e-16	1.82099e-15			AT4G05050	UBQ11	-1.05657	0	0
AT5G57625	AT5G57625	1.61514	4.79131e-68	4.65327e-67			AT3G55950	CCR3	-1.05654	1.92691e-38	1.18615e-37
AT2G04240	XERICO	1.61467	7.64938e-105	1.09546e-103			AT1G17147	VQ1	-1.0561	3.88734e-25	1.78355e-24
AT3G05980	AT3G05980	1.614	6.50899e-38	3.96388e-37			AT3G47510	AT3G47510	-1.05592	6.43123e-23	2.78465e-22
AT1G10400	UGT90A2	1.61392	4.78171e-14	1.55368e-13			AT2G36340	AT2G36340	-1.05586	3.94135e-19	1.52373e-18
AT1G02700	AT1G02700	1.61331	2.01209e-37	1.2098e-36			AT1G65380	CLV2	-1.05515	7.63858e-44	5.14865e-43
AT1G48580	AT1G48580	1.6133	1.86631e-37	1.12373e-36			AT5G48380	BIR1	-1.05511	0	0
AT4G36100	AT4G36100	1.61306	0.0161026	0.0251064			AT4G13250	NYC1	-1.0538	0	0
AT5G66990	RKD3	1.61277	0.0157488	0.0245832			AT4G38440	AT4G38440	-1.05358	3.22002e-103	4.54529e-102
AT3G61560	RTNLB6	1.61205	3.22489e-121	5.33732e-120			AT5G07110	PRA1B6	-1.05354	8.07517e-21	3.2839e-20
AT1G77200	ERF037	1.61167	4.81885e-08	1.19388e-07			AT2G46050	PCMP-E39	-1.05287	0.00346923	0.00588582
AT4G11642	AT4G11642	1.61157	0.00856925	0.013868			AT4G28025	AT4G28025	-1.05265	2.76661e-161	6.13154e-160
AT4G28720	YUC8	1.61145	3.52306e-29	1.78699e-28			AT2G25780	AT2G25780	-1.05228	2.7324e-18	1.02947e-17
AT1G18140	LAC1	1.61004	5.96342e-11	1.71166e-10			AT4G29440	AT4G29440	-1.05179	7.25064e-117	1.15451e-115
AT3G43205	AT3G43205	1.60992	0.0161455	0.0251626			AT1G10330	PCMP-E71	-1.05113	0.000188477	0.000362358
AT4G35640	SAT4	1.60986	4.47198e-26	2.09954e-25			AT1G68190	AT1G68190	-1.05103	2.15345e-66	2.05098e-65
AT2G36815	AT2G36815	1.60979	0.0165467	0.0257535			AT3G49720	AT3G49720	-1.05057	2.95921e-159	6.491e-158
AT5G59340	WOX2	1.60943	8.52273e-28	4.18139e-27			AT4G24040	TRE1	-1.05043	1.56588e-55	1.28459e-54
AT2G35890	CPK25	1.60772	4.0339e-05	8.17049e-05			AT5G11090	AT5G11090	-1.05023	2.94262e-233	9.48302e-232
AT3G24780	AT3G24780	1.60768	2.95371e-11	8.61108e-11			AT1G29700	AT1G29700	-1.05007	3.93685e-113	6.08702e-112
AT1G75920	AT1G75920	1.6076	0.00378246	0.00639183			AT1G18280	AT1G18280	-1.04997	7.58445e-05	0.000150211
AT3G27910	AT3G27910	1.6065	0.0115515	0.0183694			AT1G60160	POT12	-1.04994	2.86347e-154	6.05799e-153
AT2G16580	AT2G16580	1.60504	5.85184e-18	2.18708e-17			AT5G66710	AT5G66710	-1.04956	0.00753328	0.0122885
AT5G60220	TET4	1.60408	4.88454e-07	1.13435e-06			AT5G25440	AT5G25440	-1.04948	4.67232e-22	1.98056e-21
AT1G02790	PGA3	1.60305	0.0169161	0.0262979			AT3G62220	AT3G62220	-1.04944	6.76604e-34	3.81819e-33
AT2G14180	AT2G14180	1.60256	0.0171454	0.0266335			AT1G36320	AT1G36320	-1.04919	2.2459e-283	9.38661e-282
AT2G05520	GRP3	1.60122	0	0			AT3G30875	AT3G30875	-1.04859	5.65748e-28	2.789e-27
AT1G12855	AT1G12855	1.60106	0.00946707	0.0152153			AT5G59640	AT5G59640	-1.04803	0.0296103	0.0443738
AT5G27190	AT5G27190	1.60043	0.0174013	0.027008			AT1G68935	AT1G68935	-1.04766	1.17073e-09	3.15928e-09
AT3G62680	PRP3	1.59958	4.09037e-69	4.01053e-68			AT5G50900	AT5G50900	-1.04762	2.61549e-109	3.93013e-108
AT1G53035	AT1G53035	1.59929	1.31817e-45	9.16212e-45			AT1G55800	AT1G55800	-1.04754	0.00123731	0.00220352
AT5G18060	SAUR23	1.59832	0.00117114	0.00208974			AT4G30240	AT4G30240	-1.04751	2.24728e-109	3.37883e-108
AT3G58150	AT3G58150	1.59579	1.15352e-07	2.7862e-07			AT1G80980	AT1G80980	-1.04694	0.000250532	0.000476266
AT4G25760	GDU2	1.59539	2.80972e-12	8.56555e-12			AT5G04760	AT5G04760	-1.04673	9.3407e-82	1.04822e-80
AT1G26800	AT1G26800	1.59454	9.96661e-81	1.10923e-79			AT4G33940	AT4G33940	-1.04613	2.12372e-117	3.40273e-116
AT5G45730	AT5G45730	1.59406	6.14422e-22	2.59162e-21			AT3G01920	AT3G01920	-1.04597	3.00441e-64	2.78787e-63
AT3G28470	ATMYB35	1.59369	0.0174781	0.0271166			AT3G02850	SKOR	-1.04583	2.44644e-18	9.22955e-18
AT1G75280	AT1G75280	1.59345	0	0			AT4G39780	ERF060	-1.04542	1.1855e-55	9.75351e-55
AT3G60647	AT3G60647	1.59281	2.18584e-06	4.85699e-06			AT3G21670	NPF6.4	-1.04534	7.38277e-20	2.91668e-19
AT2G37290	AT2G37290	1.59111	2.01093e-67	1.93757e-66			AT3G56140	AT3G56140	-1.04532	5.67921e-197	1.50156e-195
AT4G38825	AT4G38825	1.59105	8.12031e-05	0.00016044			AT2G43400	ETFQO	-1.04339	2.0706e-205	5.72262e-204
AT2G39490	AT2G39490	1.59071	0.00466049	0.00778521			AT3G44205	AT3G44205	-1.04339	2.97359e-08	7.46603e-08
AT1G29500	SAUR66	1.58922	6.81249e-15	2.2869e-14			AT3G28180	CSLC4	-1.0432	0	0
AT4G12880	ENODL19	1.58878	7.4129e-150	1.52545e-148			AT5G37990	AT5G37990	-1.04254	1.1875e-35	6.90976e-35
AT5G01225	AT5G01225	1.5885	0.00676151	0.0110871			AT2G43550	ATTI6	-1.042	2.30694e-32	1.25807e-31
AT1G15300	AT1G15300	1.5883	2.24888e-56	1.86703e-55			AT1G70760	ndhL	-1.04194	4.15721e-253	1.4938e-251
AT4G09940	AT4G09940	1.58779	0.0184187	0.0285008			AT5G56750	NDL1	-1.04178	2.93027e-64	2.72104e-63
AT4G22560	AT4G22560	1.58743	2.63152e-17	9.62173e-17			AT5G22545	AT5G22545	-1.04177	0.0313016	0.0467471
AT5G41610	CHX18	1.58717	6.33792e-127	1.10536e-125			AT5G04770	CAT6	-1.04055	4.31679e-20	1.71813e-19
AT1G09310	AT1G09310	1.58631	0	0			AT1G16110	WAKL6	-1.04023	1.56186e-40	1.00288e-39
AT1G54575	AT1G54575	1.58629	6.32901e-135	1.1716e-133			AT2G37025	TRFL8	-1.04021	4.54894e-33	2.52314e-32
AT5G24910	CYP714A1	1.58621	1.84287e-25	8.52553e-25			AT3G45730	AT3G45730	-1.04015	1.88262e-102	2.63566e-101
AT2G19500	CKX2	1.586	0.0128545	0.0203021			AT5G62920	ARR6	-1.03992	1.12911e-36	6.67924e-36
AT2G37960	AT2G37960	1.58523	1.40764e-14	4.6763e-14			AT4G00690	ULP1B	-1.03935	4.8801e-08	1.20847e-07
AT1G34540	CYP94D1	1.58491	0.0108387	0.0173036			AT5G23130	AT5G23130	-1.03919	1.77887e-30	9.29338e-30
AT2G01840	AT2G01840	1.58425	0.0171932	0.0267011			AT4G00370	PHT4	-1.03899	3.13987e-257	1.15084e-255
AT1G72810	TS2	1.58382	8.86934e-124	1.50485e-122			AT3G15900	AT3G15900	-1.03875	3.83095e-48	2.78516e-47
AT1G78460	AT1G78460	1.58359	0	0			AT4G09180	BHLH81	-1.03803	1.64454e-27	8.00856e-27
AT5G38197	AT5G38197	1.58163	0.0160689	0.025057			AT5G09820	PAP7	-1.03721	4.12151e-50	3.09203e-49
AT1G51470	TGG5	1.58109	0	0			AT4G27980	AT4G27980	-1.0369	0.00749657	0.0122309
AT5G54510	GH3.6	1.58062	5.44617e-279	2.21127e-277			AT2G33855	AT2G33855	-1.0365	7.74133e-76	8.15178e-75
AT3G05152	AT3G05152	1.58037	0.00140537	0.00248984			AT1G02900	RALF1	-1.03478	1.36598e-51	1.05094e-50
AT3G04030	AT3G04030	1.57905	3.54937e-46	2.48932e-45			AT4G28110	AtMYB41	-1.03476	0.0190661	0.0294474
AT4G05070	AT4G05070	1.57809	0	0			AT5G62670	AHA11	-1.03468	5.52224e-168	1.27459e-166
AT2G26290	ARSK1	1.57783	9.53191e-31	5.00836e-30			AT5G18780	AT5G18780	-1.03439	3.88345e-15	1.31763e-14
AT3G28360	ABCB16	1.5772	1.14863e-05	2.42645e-05			AT3G12400	ELC	-1.03423	3.57214e-89	4.36216e-88
AT4G28556	RIC7	1.57667	0.0022423	0.00388423			AT5G24060	AT5G24060	-1.03411	1.11014e-256	4.05155e-255
AT3G50230	AT3G50230	1.57592	1.12948e-18	4.3087e-18			AT4G10300	AT4G10300	-1.03398	1.79951e-217	5.29318e-216
AT3G18750	WNK6	1.57515	1.25972e-134	2.32858e-133			AT3G51360	AT3G51360	-1.03387	0.000305421	0.000576037
AT3G52565	AT3G52565	1.57478	0.0124542	0.0197095			AT3G61060	PP2A13	-1.03356	5.59061e-236	1.82926e-234
AT1G30515	AT1G30515	1.57381	1.61031e-09	4.3137e-09			AT4G30780	AT4G30780	-1.03353	5.30634e-90	6.54542e-89
AT3G12710	AT3G12710	1.57323	3.62492e-96	4.77975e-95			AT3G23700	AT3G23700	-1.03351	0	0
AT4G25110	AMC2	1.57195	7.07482e-22	2.97679e-21			AT5G06220	AT5G06220	-1.03311	1.85833e-267	7.18105e-266
AT4G10350	BRN2	1.57181	5.76782e-11	1.65756e-10			AT5G61950	AT5G61950	-1.0328	2.19377e-18	8.28974e-18
AT3G02610	S-ACP-DES2	1.57165	2.20549e-10	6.15854e-10			AT3G61260	AT3G61260	-1.03277	7.82911e-109	1.17437e-107
AT2G36190	CWINV4	1.57088	0.0169544	0.0263511			AT4G08360	AT4G08360	-1.03276	0.024239	0.0368662
AT3G47260	AT3G47260	1.57063	0.0173971	0.0270031			AT5G57170	AT5G57170	-1.03235	2.10312e-31	1.12301e-30
AT1G51530	AT1G51530	1.56916	0.000148035	0.000287039			AT5G38520	AT5G38520	-1.03216	2.11299e-85	2.48325e-84
AT4G03290	CML6	1.56907	0.0139219	0.0218794			AT3G10985	SAG20	-1.03199	2.85481e-144	5.67859e-143
AT1G26680	REM17	1.56901	8.09677e-26	3.77849e-25			AT2G38790	AT2G38790	-1.03186	4.17552e-44	2.82932e-43
AT1G28130	GH3.17	1.56842	4.26062e-173	1.00885e-171			AT3G28450	AT3G28450	-1.0317	1.17376e-104	1.67437e-103
AT5G63250	AT5G63250	1.56838	0.0162579	0.0253316			AT3G16250	PNSB3	-1.03126	2.34255e-100	3.22148e-99
AT4G28890	ATL42	1.568	1.24419e-20	5.03097e-20			AT5G20380	ANTR6	-1.03077	1.3357e-123	2.25878e-122
AT5G64341	CPuORF40	1.56743	0.0122907	0.0194675			AT2G39450	MTP11	-1.03009	5.94509e-82	6.69509e-81
AT2G33775	RALFL19	1.56709	0.0171665	0.026663			AT1G66780	AT1G66780	-1.02983	0.027714	0.0417446
AT1G16640	AT1G16640	1.56695	1.57115e-19	6.14081e-19			AT3G15060	RABA1G	-1.02898	2.61092e-75	2.73251e-74
AT4G35190	LOG5	1.56693	2.93577e-16	1.03687e-15			AT5G61380	APRR1	-1.02821	0	0
AT3G17150	AT3G17150	1.56642	0.019464	0.0300131			AT2G42350	ATL40	-1.02778	3.23762e-06	7.10656e-06
AT2G34185	AT2G34185	1.56631	3.60964e-13	1.13778e-12			AT5G40850	UPM1	-1.02733	0	0
AT3G30214	AT3G30214	1.56494	3.54793e-62	3.18716e-61			AT2G16650	PRORP2	-1.02721	4.81595e-51	3.66889e-50
AT5G23220	NIC3	1.56469	2.33273e-24	1.04979e-23			AT1G76700	ATJ10	-1.02711	3.32323e-80	3.6778e-79
AT3G03840	AT3G03840	1.56395	2.06762e-07	4.91168e-07			AT1G25682	AT1G25682	-1.02617	8.41218e-82	9.44435e-81
AT1G62280	SLAH1	1.56382	5.26211e-07	1.22049e-06			AT2G35130	AT2G35130	-1.02566	5.25478e-71	5.26711e-70
AT3G04380	SUVR4	1.56262	1.11328e-63	1.02414e-62			AT3G60170	AT3G60170	-1.02535	0.0199883	0.0307587
AT5G42235	AT5G42235	1.56262	0.00557473	0.00923236			AT4G34881	AT4G34881	-1.02529	5.40709e-122	9.01298e-121
AT1G15630	AT1G15630	1.56088	4.57621e-05	9.2295e-05			AT2G36835	AT2G36835	-1.02514	4.59303e-174	1.09362e-172
AT2G30424	TCL2	1.56067	1.92953e-23	8.48078e-23			AT3G47070	AT3G47070	-1.02482	1.77139e-217	5.21644e-216
AT3G28150	AXY4L	1.56015	1.65037e-27	8.03545e-27			AT1G35660	AT1G35660	-1.02466	1.73566e-61	1.54347e-60
AT1G35290	AT1G35290	1.55927	1.9749e-11	5.80173e-11			AT5G17370	AT5G17370	-1.02415	1.15783e-29	5.93867e-29
AT3G25260	NPF4.1	1.55913	0.00864387	0.0139755			AT1G55450	AT1G55450	-1.02407	1.06966e-247	3.72853e-246
AT3G61950	BHLH67	1.55831	3.05277e-11	8.89075e-11			AT3G24560	RSY3	-1.02322	5.92457e-26	2.77408e-25
AT3G20075	CYP705A14P	1.55797	0.00417686	0.00702034			AT5G11740	AGP15	-1.02288	0	0
AT3G61680	AT3G61680	1.55775	1.21858e-80	1.35327e-79			AT3G28080	AT3G28080	-1.02245	1.78907e-28	8.92966e-28
AT1G67105	AT1G67105	1.55636	1.80619e-116	2.86884e-115			AT5G04880	AT5G04880	-1.02152	1.26477e-27	6.1768e-27
AT4G17695	KAN3	1.55494	1.7623e-42	1.16607e-41			AT3G54363	AT3G54363	-1.02054	1.13282e-09	3.05954e-09
AT5G42680	AT5G42680	1.55478	4.68902e-32	2.53551e-31			AT2G29120	GLR2.7	-1.02048	1.45971e-10	4.10963e-10
AT1G59920	AT1G59920	1.5542	0.0202509	0.0311327			AT1G64680	AT1G64680	-1.02034	5.14448e-265	1.96426e-263
AT5G60830	AtbZIP70	1.55405	0.0198837	0.0306178			AT1G61460	AT1G61460	-1.02024	6.01926e-11	1.7273e-10
AT5G05180	AT5G05180	1.5531	9.65066e-121	1.59208e-119			AT3G03630	CS26	-1.02021	2.46288e-63	2.25999e-62
AT1G02970	WEE1	1.55264	4.42817e-32	2.39548e-31			AT4G36648	AT4G36648	-1.0202	3.87958e-262	1.46384e-260
AT4G12735	AT4G12735	1.55261	1.32581e-20	5.35507e-20			AT5G06090	GPAT7	-1.02017	1.77585e-07	4.23664e-07
AT2G33350	AT2G33350	1.55231	0.00030344	0.000572428			AT5G09800	PUB28	-1.0194	4.4183e-22	1.87412e-21
AT1G56150	SAUR71	1.55159	7.4878e-45	5.14172e-44			AT3G24400	AT3G24400	-1.01932	0.00578444	0.00955865
AT3G23190	AT3G23190	1.54955	4.17507e-26	1.96194e-25			AT4G25270	PCMP-E53	-1.01914	2.05192e-20	8.24891e-20
AT4G32380	AT4G32380	1.54949	0.00875379	0.0141434			AT3G15440	AT3G15440	-1.01773	0.0187741	0.0290156
AT1G01190	CYP78A8	1.54913	5.41839e-21	2.2165e-20			AT2G27590	AT2G27590	-1.01711	3.09666e-32	1.68121e-31
AT5G40720	AT5G40720	1.54866	3.24482e-87	3.8865e-86			AT5G04550	AT5G04550	-1.0169	2.10807e-255	7.61758e-254
AT2G35700	ERF038	1.54854	0.000614555	0.00112592			AT3G25430	AT3G25430	-1.01642	2.26316e-21	9.35883e-21
AT4G13540	AT4G13540	1.54817	8.78439e-42	5.7515e-41			AT5G19520	MSL9	-1.01584	3.42051e-90	4.22533e-89
AT1G26360	MES13	1.54728	4.66146e-06	1.01381e-05			AT5G64667	IDL2	-1.01549	0.00279598	0.00479664
AT4G31730	GDU1	1.54723	8.76296e-20	3.44918e-19			AT3G07390	AIR12	-1.01541	2.52006e-45	1.74591e-44
AT2G37810	AT2G37810	1.54707	0.0173463	0.0269276			AT1G54250	NRPB8A	-1.01491	4.37733e-38	2.67654e-37
AT5G04950	NAS1	1.54559	1.52645e-82	1.7289e-81			AT4G04692	AT4G04692	-1.01479	2.11226e-134	3.89325e-133
AT2G38940	PHT1-4	1.54469	3.11211e-136	5.8412e-135			AT1G11080	SCPL31	-1.01447	4.77947e-51	3.64218e-50
AT1G77110	PIN6	1.54467	3.87492e-40	2.46954e-39			AT4G30450	AT4G30450	-1.01395	1.37484e-28	6.8917e-28
AT4G31970	CYP82C2	1.54443	0.0191011	0.0294961			AT4G12520	AT4G12520	-1.01383	2.15691e-08	5.45779e-08
AT4G31640	REM5	1.54415	5.01508e-06	1.08813e-05			AT2G47730	GSTF8	-1.01263	2.79951e-235	9.11352e-234
[truncated: 1,236 more rows]

## Sheet: val1 val2-e vs WT
up							down
ID	name	log2Folc Change	p vaule	FDR			ID	name	log2Folc Change	p vaule	FDR
AT4G28520	CRC	18.8091	0	0			AT4G34410	ERF109	-8.93368	0	0
AT4G27160	AT2S3	17.7173	0	0			AT1G12610	DREB1F	-8.26111	1.83e-241	2.32e-240
AT4G27170	AT2S4	16.9668	0	0			AT1G63030	DREB1E	-8.21651	1.72e-53	7.31e-53
AT1G47540	ATTI7	16.2591	0	0			AT5G52020	ERF025	-7.75799	0	0
AT4G25140	OLEO1	16.1813	0	0			AT1G22810	ERF019	-7.6064	4.86e-138	3.9e-137
AT5G44120	CRA1	16.0932	0	0			AT1G02620	AT1G02620	-7.15038	5.9e-102	3.79e-101
AT1G03880	CRB	15.9229	0	0			AT2G34600	TIFY 5B	-7.02416	0	0
AT2G28490	AT2G28490	15.8338	0	0			AT3G22830	HSFA6B	-6.96007	1.55e-215	1.79e-214
AT5G54740	SESA5	15.4673	0	0			AT4G13310	CYP71A20	-6.95515	6.1e-71	3.07e-70
AT5G40420	OLEO2	15.1714	0	0			AT2G24130	AT2G24130	-6.94855	4.43e-45	1.72e-44
AT4G27150	AT2S2	15.1545	0	0			AT5G46890	AT5G46890	-6.79887	2.9e-164	2.64e-163
AT4G27140	AT2S1	15.1538	0	0			AT3G48520	CYP94B3	-6.79129	0	0
AT4G36700	AT4G36700	15.062	0	0			AT1G30135	TIFY5A	-6.6323	0	0
AT2G15010	AT2G15010	14.7465	0	0			AT3G44120	AT3G44120	-6.58221	1.58e-39	5.71e-39
AT1G65090	AT1G65090	13.9917	1.02e-276	1.49e-275			AT5G47450	TIP2-3	-6.57589	0	0
AT3G54940	AT3G54940	13.8652	8.92e-276	1.3e-274			AT4G13300	TPS13	-6.53637	6.69e-48	2.67e-47
AT4G26740	PXG1	13.5991	0	0			AT2G25460	AT2G25460	-6.278	0	0
AT3G63040	AT3G63040	13.4148	5.33e-212	6.08e-211			AT3G43740	AT3G43740	-6.20914	1.16e-289	1.78e-288
AT1G04660	AT1G04660	13.2397	0	0			AT1G17610	AT1G17610	-6.10726	8.18e-42	3.04e-41
AT4G33820	AT4G33820	13.148	3.39e-221	3.99e-220			AT3G46370	AT3G46370	-5.92352	1.89e-104	1.24e-103
AT2G34700	AT2G34700	13.1142	0	0			AT2G05995	AT2G05995	-5.92205	2.53e-25	7.41e-25
AT1G04560	AT1G04560	12.9615	0	0			AT3G01830	CML40	-5.87708	0	0
AT1G54870	AT1G54870	12.9202	0	0			AT2G03710	AGL3	-5.8493	1.75e-204	1.95e-203
AT1G54860	AT1G54860	12.9075	1.04e-203	1.16e-202			AT1G56660	AT1G56660	-5.7711	0	0
AT5G38160	AT5G38160	12.8412	5.25e-185	5.34e-184			AT3G43850	AT3G43850	-5.7432	3.95e-26	1.17e-25
AT5G45690	AT5G45690	12.7062	7.09e-217	8.22e-216			AT5G62165	AGL42	-5.66859	2.44e-48	9.8e-48
AT1G78500	PEN6	12.6982	2.01e-268	2.83e-267			AT3G30122	AT3G30122	-5.51334	2.56e-67	1.24e-66
AT2G34870	MEE26	12.6691	1.02e-215	1.18e-214			AT4G27654	AT4G27654	-5.51211	2.26e-82	1.26e-81
AT4G03050	AOP3	12.6326	5.38e-184	5.44e-183			AT5G14470	GLCAK2	-5.49061	6.95e-184	7.03e-183
AT2G44470	BGLU29	12.6157	1.63e-201	1.78e-200			AT5G52050	AT5G52050	-5.48444	0	0
AT4G34520	FAE1	12.5955	4.59e-177	4.5e-176			AT1G20160	CRSP	-5.42158	0	0
AT3G15670	AT3G15670	12.5828	0	0			AT5G42380	CML37	-5.41567	0	0
AT1G75830	PDF1.1	12.4476	2.27e-219	2.65e-218			AT5G23700	AT5G23700	-5.38672	2.45e-66	1.18e-65
AT2G42560	AT2G42560	12.3772	5.32e-244	6.8e-243			AT1G22980	AT1G22980	-5.37195	2.25e-22	6.24e-22
AT3G17520	AT3G17520	12.3424	0	0			AT2G26380	AT2G26380	-5.36522	5.72e-44	2.19e-43
AT4G21020	AT4G21020	12.3402	0	0			AT1G10160	AT1G10160	-5.32738	9.67e-126	7.25e-125
AT5G22470	PARP3	12.3173	8.04e-202	8.83e-201			AT1G53940	GLIP2	-5.29129	2.64e-57	1.16e-56
AT5G55240	PXG2	12.3123	1.29e-189	1.34e-188			AT1G80840	WRKY40	-5.28733	0	0
AT1G48470	GLN1-5	12.2973	1.36e-258	1.84e-257			AT3G16860	COBL8	-5.27228	0	0
AT1G73190	TIP3-1	12.2888	0	0			AT3G56790	AT3G56790	-5.21933	5.01e-45	1.94e-44
AT5G62800	AT5G62800	12.2822	5.31e-189	5.51e-188			AT5G46900	AT5G46900	-5.19474	5.8e-171	5.5e-170
AT3G56350	MSD2	12.2756	9.27e-199	1e-197			AT5G43650	BHLH92	-5.17572	3.36e-47	1.33e-46
AT3G24250	AT3G24250	12.2357	1.1e-163	9.95e-163			AT4G29780	AT4G29780	-5.13199	0	0
AT5G44360	AT5G44360	12.1946	3.18e-165	2.91e-164			AT3G46090	ZAT7	-5.12363	0	0
AT4G15210	BAM5	12.1928	0	0			AT4G26530	AT4G26530	-5.10286	0	0
AT5G01300	AT5G01300	12.1712	1.75e-186	1.79e-185			AT1G73910	ARP4A	-5.09397	7.99e-20	2.11e-19
AT1G68250	AT1G68250	12.1586	0	0			AT4G04695	CPK31	-5.08597	3.12e-112	2.15e-111
AT5G51210	OL3	12.0862	0	0			AT1G16130	WAKL2	-5.07111	0	0
AT3G51810	EM1	12.0343	3.75e-269	5.28e-268			AT5G21960	ERF016	-5.0547	2.09e-36	7.25e-36
AT2G18540	AT2G18540	12.0325	6.07e-225	7.26e-224			AT4G10310	HKT1	-5.04741	4.33e-130	3.32e-129
AT4G09600	GASA3	11.9779	1.52e-178	1.5e-177			AT2G33790	AGP30	-5.03325	6.99e-160	6.23e-159
AT3G12203	SCPL17	11.8578	0	0			AT1G74930	ERF018	-5.02677	0	0
AT3G21370	BGLU19	11.8148	3.27e-206	3.65e-205			AT5G28335	AT5G28335	-5.0051	1.06e-24	3.06e-24
AT1G17810	TIP3-2	11.7976	0	0			AT1G11925	AT1G11925	-4.93727	5.96e-27	1.79e-26
AT3G24650	ABI3	11.7833	1.4e-275	2.03e-274			AT2G45660	SOC1	-4.93114	0	0
AT5G07550	GRP19	11.7633	2.31e-260	3.15e-259			AT2G47880	GRXC13	-4.92945	4.22e-84	2.38e-83
AT1G67100	LBD40	11.7586	5.7e-193	6.02e-192			AT3G07195	AT3G07195	-4.92077	0	0
AT5G38170	AT5G38170	11.7317	2.45e-134	1.92e-133			AT3G12240	SCPL15	-4.88258	3.04e-30	9.66e-30
AT2G41260	M17	11.6608	1.19e-186	1.22e-185			AT2G04800	AT2G04800	-4.87241	6.24e-137	4.98e-136
AT2G23640	RTNLB13	11.654	2.1e-141	1.71e-140			AT4G08040	ACS11	-4.86097	7.7e-131	5.93e-130
AT1G48800	TPS28	11.6187	6.99e-164	6.34e-163			AT5G49730	FRO6	-4.85869	0	0
AT2G05580	AT2G05580	11.5734	0	0			AT4G29610	CDA6	-4.8396	1.88e-87	1.08e-86
AT5G55410	AT5G55410	11.5154	9.92e-169	9.25e-168			AT5G47850	CCR4	-4.83152	1.31e-35	4.49e-35
AT5G03820	AT5G03820	11.4829	5.13e-139	4.14e-138			AT5G48400	GLR1.2	-4.82775	8.41e-64	3.96e-63
AT2G23510	SDT	11.4579	3.11e-142	2.55e-141			AT3G45960	EXLA3	-4.82725	2.02e-245	2.59e-244
AT1G07645	ATDSI-1VOC	11.4047	2.54e-159	2.25e-158			AT5G19890	PER59	-4.8042	1.61e-107	1.07e-106
AT5G50700	HSD1	11.3668	0	0			AT2G44840	ERF13	-4.77724	0	0
AT4G31830	AT4G31830	11.3535	3.61e-147	3.03e-146			AT5G15290	CASP5	-4.77171	1.41e-53	6.01e-53
AT5G45980	WOX8	11.3158	2.25e-130	1.73e-129			AT1G70170	MMP	-4.75075	2.19e-121	1.6e-120
AT1G03890	CRD	11.2798	4.79e-91	2.84e-90			AT5G41750	AT5G41750	-4.74658	0	0
AT1G05510	AT1G05510	11.2508	0	0			AT1G11185	AT1G11185	-4.72407	1.43e-195	1.53e-194
AT5G07190	ATS3	11.1669	0	0			AT1G65480	FT	-4.72401	5.57e-18	1.41e-17
AT3G58450	AT3G58450	11.1093	1.25e-144	1.04e-143			AT5G50915	BHLH137	-4.72231	2.02e-168	1.88e-167
AT5G50600	HSD1	11.0605	0	0			AT2G22760	BHLH19	-4.71977	1.86e-34	6.26e-34
AT3G57620	AT3G57620	11.0433	2.17e-120	1.58e-119			AT3G45700	NPF2.4	-4.71619	1.51e-139	1.22e-138
AT1G48990	AT1G48990	11.02	2.43e-144	2.01e-143			AT5G20240	PI	-4.68652	5.2e-177	5.09e-176
AT5G35660	AT5G35660	10.9628	2.7e-159	2.4e-158			AT1G15010	AT1G15010	-4.68339	4.5e-169	4.21e-168
AT2G21720	AT2G21720	10.9519	1.15e-143	9.49e-143			AT1G19210	ERF017	-4.68248	5.19e-162	4.67e-161
AT1G27461	AT1G27461	10.7863	3.2e-170	3.02e-169			AT1G49490	PEX2	-4.6707	4.58e-91	2.71e-90
AT4G10850	SWEET7	10.7445	4.83e-97	2.99e-96			AT1G56250	VBF	-4.66517	1.23e-123	9.11e-123
AT4G31900	PKR2	10.6732	5.7e-201	6.23e-200			AT1G72520	LOX4	-4.64257	0	0
AT2G27380	EPR1	10.624	1e-167	9.29e-167			AT5G58680	AT5G58680	-4.62681	5.75e-180	5.72e-179
AT4G39130	AT4G39130	10.5662	9.26e-128	7.01e-127			AT1G67865	AT1G67865	-4.5965	0	0
AT5G62490	HVA22B	10.5608	2.13e-173	2.04e-172			AT4G36000	AT4G36000	-4.5726	2.09e-49	8.51e-49
AT3G29385	AT3G29385	10.558	1.51e-108	1.01e-107			AT3G55980	SZF1	-4.56461	0	0
AT1G74140	AT1G74140	10.5349	8.06e-157	7.08e-156			AT1G50750	AT1G50750	-4.54831	0	0
AT1G32560	AT1G32560	10.5038	2.86e-231	3.5e-230			AT4G13572	AT4G13572	-4.54464	1.91e-14	4.45e-14
AT1G56100	AT1G56100	10.4901	3.24e-85	1.85e-84			AT1G36070	AT1G36070	-4.53253	1.34e-224	1.59e-223
AT1G77655	AT1G77655	10.4714	2.94e-136	2.33e-135			AT4G22214	AT4G22214	-4.52654	8.73e-24	2.49e-23
AT1G77950	AGL67	10.4651	1.13e-152	9.76e-152			AT2G31083	CLE5	-4.5141	5.51e-40	2e-39
AT5G24130	AT5G24130	10.4505	2.61e-188	2.69e-187			AT1G29600	AT1G29600	-4.46094	3.39e-82	1.88e-81
AT4G35650	IDH3	10.4395	1.11e-187	1.14e-186			AT1G17380	TIFY11A	-4.45351	0	0
AT1G12805	AT1G12805	10.4353	1.26e-237	1.58e-236			AT4G11280	ACS6	-4.43179	0	0
AT3G21720	ICL	10.4216	0	0			AT4G00110	GAE3	-4.42968	2.67e-142	2.19e-141
AT1G70260	AT1G70260	10.411	3.7e-137	2.95e-136			AT5G24070	PER61	-4.41258	1.01e-50	4.15e-50
AT3G21380	JAL36	10.41	1.84e-141	1.5e-140			AT3G05727	AT3G05727	-4.40668	0	0
AT3G48270	CYP71A26	10.3814	1.85e-111	1.27e-110			AT3G61400	AT3G61400	-4.39513	1.93e-16	4.71e-16
AT3G22500	ATECP31	10.3576	2.46e-109	1.66e-108			AT1G17600	AT1G17600	-4.38128	2.06e-54	8.82e-54
AT3G22640	PAP85	10.2942	0	0			AT1G23935	AT1G23935	-4.37022	4.88e-38	1.73e-37
AT2G25890	AT2G25890	10.29	0	0			AT2G41640	AT2G41640	-4.3324	0	0
AT3G01570	AT3G01570	10.2899	0	0			AT1G57990	PUP18	-4.32497	0	0
AT1G65880	AAE20	10.2816	8.95e-87	5.14e-86			AT2G18210	AT2G18210	-4.31515	1.3e-205	1.45e-204
AT1G28640	AT1G28640	10.2185	4.64e-108	3.11e-107			AT2G14580	PRB1	-4.31334	2.51e-61	1.15e-60
AT2G38905	AT2G38905	10.1736	4.37e-109	2.94e-108			AT3G55840	HSPRO1	-4.304	1.1e-195	1.17e-194
AT5G04380	AT5G04380	10.1487	2.44e-105	1.6e-104			AT4G17180	AT4G17180	-4.30138	1.36e-76	7.18e-76
AT1G71470	AT1G71470	10.1404	1.58e-103	1.03e-102			AT5G45060	AT5G45060	-4.29762	0	0
AT4G10020	HSD5	10.1079	0	0			AT1G58320	PCR9	-4.28133	6.03e-12	1.31e-11
AT1G25410	IPT6	10.0762	9.34e-103	6.04e-102			AT4G12520	AT4G12520	-4.28038	2.03e-89	1.19e-88
AT2G40220	ABI4	10.0627	6.37e-102	4.1e-101			AT1G18300	NUDT4	-4.26966	0	0
AT2G40170	EM6	10.0445	1.56e-229	1.9e-228			AT3G02840	AT3G02840	-4.26766	0	0
AT3G25160	AT3G25160	10.0412	6.84e-100	4.33e-99			AT5G01100	AT5G01100	-4.26514	0	0
AT5G07530	GRP17	10.0197	9.28e-101	5.91e-100			AT4G25470	DREB1C	-4.26428	4.23e-170	3.99e-169
AT1G22100	AT1G22100	9.97838	6.29e-97	3.89e-96			AT2G28210	ATACA2	-4.25042	1.3e-34	4.39e-34
AT1G72100	AT1G72100	9.95154	3.34e-212	3.82e-211			AT1G28480	GRXC9	-4.25017	7.52e-274	1.08e-272
AT5G22810	AT5G22810	9.91014	0	0			AT4G38390	RHS17	-4.24892	4.2e-78	2.25e-77
AT3G05260	AT3G05260	9.89801	1.67e-173	1.61e-172			AT1G76650	CML38	-4.24393	0	0
AT4G14080	A6	9.89099	5.1e-106	3.37e-105			AT2G18690	AT2G18690	-4.2407	0	0
AT2G41280	M10	9.88998	9.2e-259	1.24e-257			AT1G07135	AT1G07135	-4.24019	1.87e-129	1.43e-128
AT1G61120	GES	9.88297	1.68e-167	1.56e-166			AT3G61390	PUB36	-4.23918	8.74e-14	2e-13
AT1G48660	AT1G48660	9.87844	4.94e-117	3.52e-116			AT2G39240	AT2G39240	-4.22269	8.63e-13	1.92e-12
AT2G23240	AT2G23240	9.86346	2.19e-97	1.36e-96			AT5G23770	DUF8	-4.22058	6.18e-40	2.24e-39
AT4G18650	AT4G18650	9.85621	1.53e-93	9.22e-93			AT2G35710	PGSIP8	-4.21562	0	0
AT1G72570	AIL1	9.84897	2.94e-97	1.82e-96			AT2G18800	XTH21	-4.20233	1.88e-42	7.04e-42
AT1G32710	AT1G32710	9.84787	5.69e-105	3.74e-104			AT5G45340	CYP707A3	-4.19706	0	0
AT3G18570	AT3G18570	9.84465	1.21e-141	9.9e-141			AT1G52050	JAL8	-4.19482	1.14e-147	9.55e-147
AT2G36640	ATECP63	9.83959	8.88e-270	1.26e-268			AT5G59260	LECRK21	-4.19325	3.95e-16	9.58e-16
AT2G33520	AT2G33520	9.82417	4.27e-172	4.07e-171			AT2G42510	AT2G42510	-4.19042	2.44e-10	5.08e-10
AT1G27990	AT1G27990	9.81792	3.96e-141	3.23e-140			AT5G62240	AT5G62240	-4.18982	2.36e-19	6.19e-19
AT4G11040	AT4G11040	9.80373	3.43e-188	3.53e-187			AT2G45930	AT2G45930	-4.16995	4.71e-12	1.03e-11
AT3G53040	AT3G53040	9.80215	0	0			AT1G52060	JAL9	-4.16657	7.9e-190	8.21e-189
AT5G07500	PEI1	9.79189	1.05e-246	1.35e-245			AT3G47580	AT3G47580	-4.14956	1.78e-106	1.18e-105
AT5G66430	AT5G66430	9.76776	1.74e-118	1.25e-117			AT3G11550	CASP2	-4.14034	6.27e-162	5.63e-161
AT3G30833	AT3G30833	9.76467	2.4e-88	1.4e-87			AT4G01770	RGXT1	-4.13725	1.41e-43	5.38e-43
AT3G15280	AT3G15280	9.76163	1.7e-102	1.1e-101			AT3G20600	NDR1	-4.13295	0	0
AT3G58740	CSY1	9.75184	9.63e-88	5.57e-87			AT1G02400	GA2OX6	-4.13094	0	0
AT3G25280	NPF4.2	9.73487	1.52e-84	8.6e-84			AT5G66640	DAR3	-4.12348	2.21e-149	1.88e-148
AT1G52690	AT1G52690	9.71214	0	0			AT5G62340	AT5G62340	-4.12262	6.19e-141	5.05e-140
AT5G38180	AT5G38180	9.69363	3.06e-86	1.75e-85			AT4G12510	AT4G12510	-4.12215	9.73e-163	8.77e-162
AT3G21800	UGT71B8	9.66203	7.21e-146	6.01e-145			AT5G57010	AT5G57010	-4.11468	1.9e-254	2.51e-253
AT5G40560	DegP13	9.60602	2.75e-84	1.55e-83			AT4G37850	BHLH25	-4.11371	5.1e-23	1.43e-22
AT5G59310	LTP4	9.59557	1.19e-193	1.26e-192			AT1G28370	ERF11	-4.10529	0	0
AT1G12064	AT1G12064	9.57477	8.7e-131	6.7e-130			AT5G45050	WRKY16	-4.10235	0	0
AT4G28090	sks10	9.54339	2.13e-87	1.23e-86			AT4G08090	AT4G08090	-4.09697	1.94e-10	4.04e-10
AT4G36600	AT4G36600	9.53295	5.59e-115	3.92e-114			AT3G25190	AT3G25190	-4.09604	8.61e-218	1e-216
AT5G16460	AT5G16460	9.51663	7.33e-94	4.43e-93			AT3G46500	AT3G46500	-4.09289	1.66e-38	5.93e-38
AT1G23070	AT1G23070	9.47164	3.59e-95	2.19e-94			AT2G35930	PUB23	-4.09048	0	0
AT5G66780	AT5G66780	9.4697	0	0			AT4G33120	AT4G33120	-4.09011	5.11e-79	2.76e-78
AT1G43800	S-ACP-DES6	9.46302	0	0			AT5G15265	AT5G15265	-4.08158	2.96e-55	1.28e-54
AT2G41225	AT2G41225	9.45978	1.27e-77	6.79e-77			AT4G35985	AT4G35985	-4.08135	0	0
AT2G39030	NATA1	9.41603	1.54e-148	1.3e-147			AT5G62330	AT5G62330	-4.07962	7.79e-14	1.78e-13
AT3G02480	AT3G02480	9.39669	0	0			AT3G02850	SKOR	-4.07887	3.5e-123	2.59e-122
AT4G05110	ENT6	9.39036	0	0			AT1G51270	PVA14	-4.06658	0	0
AT1G22015	B3GALT5	9.38069	4.16e-76	2.19e-75			AT4G12917	AT4G12917	-4.06435	1.35e-198	1.45e-197
AT5G07200	GA20OX3	9.35619	0	0			AT1G32640	MYC2	-4.05826	0	0
AT1G68510	LBD42	9.31656	1.31e-127	9.89e-127			AT4G13395	DVL10	-4.05357	1.18e-286	1.78e-285
AT3G29970	AT3G29970	9.29779	3.51e-106	2.33e-105			AT5G12340	AT5G12340	-4.03257	1.36e-115	9.56e-115
AT5G08460	AT5G08460	9.27894	1.08e-75	5.66e-75			AT5G51790	BHLH120	-4.03082	1.63e-44	6.26e-44
AT1G21970	NFYB9	9.26104	7.07e-76	3.72e-75			AT1G61300	AT1G61300	-4.02797	0	0
AT1G62410	AT1G62410	9.25578	1.2e-74	6.24e-74			AT4G22520	AT4G22520	-4.01605	2.08e-170	1.97e-169
AT5G44310	AT5G44310	9.25151	0	0			AT5G28610	AT5G28610	-4.00847	2.36e-100	1.5e-99
AT1G03106	AT1G03106	9.23834	0	0			AT3G59370	AT3G59370	-4.00735	2.89e-47	1.14e-46
AT3G27660	OL2	9.22237	0	0			AT4G15330	CYP705A1	-3.98947	5.2e-158	4.59e-157
AT4G21370	PSEUDOSRKA	9.2215	6.17e-113	4.27e-112			AT1G70030	AT1G70030	-3.98615	1.32e-09	2.68e-09
AT2G20800	NDB4	9.21911	4.23e-112	2.92e-111			AT1G13550	AT1G13550	-3.98274	8.18e-13	1.82e-12
AT5G09640	SCPL19	9.2142	1.12e-117	8.04e-117			AT4G25490	DREB1B	-3.98075	5e-92	2.99e-91
AT5G54000	AT5G54000	9.20699	3.88e-99	2.44e-98			AT3G52450	PUB22	-3.97706	0	0
AT5G50770	HSD6	9.2055	0	0			AT4G17490	ERF6	-3.97693	0	0
AT5G04500	AT5G04500	9.1723	5.53e-90	3.25e-89			AT3G20940	CYP705A30	-3.96601	9.1e-80	4.94e-79
AT5G59170	AT5G59170	9.15871	0	0			AT1G69523	AT1G69523	-3.96479	5.26e-262	7.21e-261
AT5G27200	ACP5	9.15386	0	0			AT1G07160	AT1G07160	-3.96301	4.71e-45	1.82e-44
AT2G39330	JAL23	9.08523	6.61e-210	7.49e-209			AT5G48100	TT10	-3.95226	4.34e-22	1.2e-21
AT4G28365	ENODL3	9.08142	1.07e-128	8.14e-128			AT5G02000	AT5G02000	-3.94932	1.49e-12	3.3e-12
AT1G28650	AT1G28650	9.03399	9.61e-80	5.21e-79			AT3G57770	AT3G57770	-3.94698	3.44e-286	5.19e-285
AT4G33145	AT4G33145	9.01288	3.23e-250	4.23e-249			AT3G43540	AT3G43540	-3.94583	0	0
AT3G58400	AT3G58400	9.01268	5.56e-64	2.62e-63			AT1G56240	PP2B13	-3.93947	5.72e-176	5.57e-175
AT3G58410	AT3G58410	9.00568	1.49e-64	7.03e-64			AT4G23180	CRK10	-3.93901	0	0
AT1G06990	AT1G06990	8.98165	1.39e-75	7.29e-75			AT1G61310	AT1G61310	-3.93811	9.23e-163	8.32e-162
AT5G63085	AT5G63085	8.95088	2.96e-66	1.42e-65			AT1G62320	AT1G62320	-3.93629	9.3e-126	6.97e-125
AT3G21880	COL12	8.9264	4.32e-69	2.13e-68			AT1G03800	ERF10	-3.93007	2.73e-12	5.99e-12
AT1G62290	APA2	8.88762	0	0			AT1G74450	AT1G74450	-3.92565	0	0
AT3G22490	AT3G22490	8.87646	1.65e-60	7.52e-60			AT1G79310	AMC7	-3.91834	9.72e-188	9.99e-187
AT2G33070	NSP2	8.85317	1.82e-290	2.79e-289			AT3G55040	GSTL2	-3.91641	0	0
AT1G60570	AT1G60570	8.84639	1.52e-96	9.39e-96			AT2G30040	MAPKKK14	-3.90477	0	0
AT3G05300	AT3G05300	8.83035	1.37e-89	8.02e-89			AT2G48020	AT2G48020	-3.89955	0	0
AT5G44220	AT5G44220	8.82015	7.44e-98	4.63e-97			AT4G22517	AT4G22517	-3.88242	6.82e-225	8.15e-224
AT4G16160	OEP162	8.8186	2.74e-66	1.32e-65			AT1G03340	AT1G03340	-3.87943	2.84e-09	5.7e-09
AT2G18340	AT2G18340	8.81543	5.54e-75	2.89e-74			AT2G22880	AT2G22880	-3.87172	0	0
AT2G02990	RNS1	8.80883	6.09e-231	7.46e-230			AT1G02660	AT1G02660	-3.86684	0	0
AT3G20210	dVPE	8.80343	4.77e-87	2.75e-86			AT1G27730	ZAT10	-3.86563	0	0
AT4G22100	BGLU3	8.76752	3.84e-70	1.92e-69			AT1G55390	AT1G55390	-3.86132	1.28e-20	3.44e-20
AT3G57510	ADPG1	8.7222	1.04e-62	4.86e-62			AT1G16160	WAKL5	-3.85837	3.06e-22	8.48e-22
AT1G17010	AT1G17010	8.71948	7.98e-74	4.12e-73			AT1G69526	AT1G69526	-3.85715	1.58e-146	1.32e-145
AT5G09550	AT5G09550	8.70895	8.82e-70	4.39e-69			AT3G30875	AT3G30875	-3.85583	1.47e-180	1.47e-179
AT2G41360	AT2G41360	8.70555	3.4e-80	1.85e-79			AT1G35210	AT1G35210	-3.85301	1.29e-132	1e-131
AT2G21490	LEA	8.6997	0	0			AT3G47340	ASN1	-3.85172	0	0
AT4G09610	GASA2	8.68721	6.1e-60	2.76e-59			AT2G22980	SCPL13	-3.84252	0	0
AT3G28415	ABCB22	8.66045	8.13e-77	4.31e-76			AT4G24380	AT4G24380	-3.8412	0	0
AT3G16300	AT3G16300	8.64875	0	0			AT4G01950	GPAT3	-3.82939	0	0
AT5G55800	AT5G55800	8.64205	5.3e-69	2.62e-68			AT4G28085	AT4G28085	-3.81733	9.49e-164	8.62e-163
AT5G39440	SnRK1.3	8.61177	2.46e-51	1.02e-50			AT2G26190	AT2G26190	-3.81182	0	0
AT4G18680	AT4G18680	8.57437	4.68e-71	2.35e-70			AT2G30020	AT2G30020	-3.80829	0	0
AT3G14040	AT3G14040	8.5714	6.47e-62	2.99e-61			AT1G76640	CML39	-3.80097	4.83e-106	3.2e-105
AT1G29680	AT1G29680	8.55315	1.49e-166	1.37e-165			AT5G41740	AT5G41740	-3.79908	0	0
AT1G14950	AT1G14950	8.55131	1.15e-73	5.93e-73			AT1G05675	UGT74E1	-3.79448	6.85e-98	4.27e-97
AT1G20925	AT1G20925	8.54964	4.12e-200	4.48e-199			AT1G43020	AT1G43020	-3.79013	8.44e-24	2.41e-23
AT1G73220	2024-10-01	8.53634	8.02e-295	1.25e-293			AT5G22240	OFP10	-3.78933	1.14e-17	2.87e-17
AT4G32490	ENODL4	8.53027	1.69e-75	8.88e-75			AT2G01918	PQL3	-3.78428	1.2e-122	8.81e-122
AT5G24860	FPF1	8.51849	5.02e-82	2.79e-81			AT4G34400	AT4G34400	-3.78296	1.22e-20	3.29e-20
AT3G29260	SDR5	8.51242	1.16e-62	5.41e-62			AT4G24570	PUMP4	-3.78081	0	0
AT2G31985	AT2G31985	8.44188	1.76e-261	2.41e-260			AT2G38470	WRKY33	-3.78034	0	0
AT5G43000	AT5G43000	8.43689	1.77e-62	8.24e-62			AT5G54090	AT5G54090	-3.77515	1.16e-178	1.15e-177
AT3G49300	AT3G49300	8.43517	6.99e-64	3.29e-63			AT3G55710	UGT76F2	-3.77492	1.92e-126	1.45e-125
AT2G38900	AT2G38900	8.4282	4.8e-63	2.24e-62			AT5G19240	AT5G19240	-3.77033	0	0
AT5G47670	NFYB6	8.40218	1.95e-145	1.62e-144			AT3G29000	CML30	-3.76691	9.01e-297	1.41e-295
AT2G22180	AT2G22180	8.3929	7.7e-74	3.97e-73			AT5G38700	AT5G38700	-3.76678	8.21e-134	6.42e-133
AT5G03795	AT5G03795	8.37229	0	0			AT3G01260	AT3G01260	-3.7661	2e-119	1.45e-118
AT5G65165	SDH2-3	8.37197	0	0			AT2G22850	AtbZIP6	-3.7532	3.8e-96	2.34e-95
AT5G25180	CYP71B14	8.37015	3.49e-70	1.74e-69			AT3G23510	AT3G23510	-3.74813	1.05e-271	1.5e-270
AT5G06760	LEA4-5	8.35737	0	0			AT3G57740	AT3G57740	-3.74256	2.98e-55	1.29e-54
AT1G19460	AT1G19460	8.34339	1.77e-61	8.12e-61			AT5G58120	AT5G58120	-3.73861	0	0
AT2G42000	AT2G42000	8.33935	4.74e-54	2.02e-53			AT2G06950	AT2G06950	-3.73847	0	0
AT2G20470	AT2G20470	8.33906	1.11e-194	1.18e-193			AT3G06490	MYB108	-3.73803	7.32e-51	3.03e-50
AT1G20860	PHT1-8	8.323	2.06e-81	1.14e-80			AT5G45040	PETJ	-3.73447	0	0
AT5G10220	ANN6	8.31119	1.42e-220	1.66e-219			AT1G18740	AT1G18740	-3.72181	0	0
AT1G71691	AT1G71691	8.29683	3.84e-67	1.87e-66			AT1G20310	AT1G20310	-3.72155	8e-85	4.54e-84
AT1G68170	AT1G68170	8.28545	0	0			AT5G06740	LECRKS5	-3.71639	5.3e-125	3.95e-124
AT5G08695	AT5G08695	8.28307	1.79e-86	1.03e-85			AT3G18320	AT3G18320	-3.71266	1.4e-100	8.9e-100
AT3G07620	AT3G07620	8.27065	3.06e-56	1.34e-55			AT5G48110	AT5G48110	-3.71103	0	0
AT5G52300	LTI65	8.2577	0	0			AT1G14540	PER4	-3.70455	2.75e-182	2.76e-181
AT2G20430	RIC6	8.25079	5.56e-58	2.47e-57			AT2G36100	CASP1	-3.70393	4.59e-176	4.47e-175
AT2G21820	AT2G21820	8.24459	2.46e-247	3.19e-246			AT1G06120	AT1G06120	-3.7025	1.88e-19	4.92e-19
AT3G49770	AT3G49770	8.21428	1.42e-59	6.42e-59			AT4G01250	WRKY22	-3.70073	0	0
AT1G60090	BGLU4	8.21419	7.38e-64	3.47e-63			AT2G36650	AT2G36650	-3.6798	2.52e-182	2.53e-181
AT1G68320	MYB62	8.21343	1.69e-285	2.54e-284			AT5G15180	PER56	-3.67542	7.65e-110	5.18e-109
AT2G19900	NADP-ME1	8.2113	0	0			AT1G65390	PP2A5	-3.67459	0	0
AT2G19770	PRO4	8.2	1.65e-68	8.1e-68			AT5G35580	AT5G35580	-3.66886	5.45e-229	6.63e-228
AT5G24950	CYP71A15	8.18255	3.41e-60	1.55e-59			AT2G27370	CASP3	-3.65384	4.11e-71	2.07e-70
AT3G44460	DPBF2	8.18011	1.09e-39	3.95e-39			AT3G53600	AT3G53600	-3.64766	1.72e-17	4.31e-17
AT4G10270	AT4G10270	8.1751	4.63e-250	6.05e-249			AT1G22570	NPF5.15	-3.64442	0	0
AT2G21450	CHR34	8.16598	9.89e-123	7.29e-122			AT1G21326	AT1G21326	-3.64265	3.02e-117	2.16e-116
AT5G57380	VIN3	8.15984	3.6e-104	2.36e-103			AT3G28770	AT3G28770	-3.63969	3.16e-103	2.05e-102
AT1G15560	AT1G15560	8.1559	4.97e-49	2.02e-48			AT4G15660	GRXS8	-3.6381	1.25e-129	9.56e-129
AT5G20790	AT5G20790	8.13293	0	0			AT1G51260	LPAT3	-3.63412	5.81e-11	1.23e-10
AT5G51760	AHG1	8.11791	1.01e-71	5.11e-71			AT3G47210	AT3G47210	-3.63411	1.67e-159	1.48e-158
AT3G25810	TPS24	8.10353	2.88e-43	1.09e-42			AT2G35658	AT2G35658	-3.63296	6.26e-76	3.29e-75
AT2G05330	AT2G05330	8.04061	1.47e-301	2.33e-300			AT1G05575	AT1G05575	-3.6273	0	0
AT3G03260	HDG8	8.04012	7.78e-158	6.86e-157			AT4G22666	AT4G22666	-3.62406	8.95e-92	5.33e-91
AT4G11710	AT4G11710	8.0371	1.09e-66	5.25e-66			AT3G16030	CES101	-3.62071	1.02e-185	1.03e-184
AT5G34851	AT5G34851	8.02662	7.48e-104	4.88e-103			AT1G33817	AT1G33817	-3.6192	3.33e-08	6.43e-08
AT5G20310	AT5G20310	8.02189	6.53e-51	2.7e-50			AT1G49450	AT1G49450	-3.61902	1.71e-56	7.48e-56
AT1G74990	AT1G74990	8.01064	1.77e-54	7.6e-54			AT2G04780	FLA7	-3.61869	0	0
AT1G25310	MEE8	8.01037	1.09e-52	4.61e-52			AT5G03620	AT5G03620	-3.6178	2.63e-30	8.35e-30
AT1G64240	AT1G64240	8.00424	1.01e-104	6.62e-104			AT1G16370	2024-10-06	-3.61601	5.07e-205	5.64e-204
AT5G55750	AT5G55750	7.9804	5e-73	2.56e-72			AT5G05900	UGT76C3	-3.61381	1.42e-18	3.64e-18
AT1G03790	SOM	7.9748	5.29e-151	4.53e-150			AT1G19770	PUP14	-3.60977	0	0
AT1G11370	PME56	7.96932	1.01e-94	6.16e-94			AT2G26530	AR781	-3.60274	0	0
AT1G65340	CYP96A3	7.96343	7.22e-53	3.05e-52			AT1G61890	AT1G61890	-3.5946	0	0
AT5G07330	AT5G07330	7.95968	0	0			AT5G15130	WRKY72	-3.59358	0	0
AT1G35750	APUM10	7.94825	5.34e-50	2.19e-49			AT1G45145	TRX5	-3.586	0	0
AT3G12960	AT3G12960	7.94681	4.6e-88	2.67e-87			AT4G26320	AGP13	-3.57627	8.31e-52	3.47e-51
AT4G37990	CAD8	7.94247	2.78e-102	1.79e-101			AT2G02310	PP2B6	-3.57592	4.62e-08	8.88e-08
AT2G26010	PDF1.3	7.93069	1.72e-278	2.52e-277			AT3G52400	SYP122	-3.57385	0	0
AT1G29100	AT1G29100	7.91981	6.95e-57	3.06e-56			AT4G27657	AT4G27657	-3.57299	3.08e-239	3.88e-238
AT3G54700	PHT1-7	7.91293	5.77e-61	2.64e-60			AT2G34510	AT2G34510	-3.56885	0	0
AT5G44440	AT5G44440	7.90503	1.72e-59	7.76e-59			AT5G56370	AT5G56370	-3.56853	1.52e-47	6.05e-47
AT4G25330	AT4G25330	7.89936	7.94e-89	4.63e-88			AT5G59270	AT5G59270	-3.56287	2.79e-09	5.6e-09
AT1G43780	SCPL44	7.89573	3.56e-41	1.31e-40			AT5G17350	AT5G17350	-3.56239	0	0
AT3G14880	AT3G14880	7.89414	1.2e-59	5.42e-59			AT4G27652	AT4G27652	-3.56089	0	0
AT4G39500	CYP96A11	7.87687	3.36e-55	1.45e-54			AT1G60470	GOLS4	-3.56015	4.75e-63	2.22e-62
AT2G27940	ATL57	7.86371	1.69e-49	6.91e-49			AT3G43790	ZIFL2	-3.55833	2.19e-99	1.38e-98
AT2G31980	CYS2	7.86234	0	0			AT2G22630	AGL17	-3.55462	1.35e-33	4.5e-33
AT2G38530	LTP2	7.86063	0	0			AT1G61340	AT1G61340	-3.55069	5.82e-166	5.35e-165
AT2G35300	LEA18	7.85357	0	0			AT3G24310	MYB305	-3.54881	1.08e-36	3.75e-36
AT3G03341	AT3G03341	7.83972	2.17e-259	2.94e-258			AT1G19020	AT1G19020	-3.54857	0	0
AT3G55240	AT3G55240	7.82641	1.09e-205	1.22e-204			AT1G16550	AT1G16550	-3.54036	1.53e-78	8.23e-78
AT2G26400	ARD1	7.82539	1.18e-61	5.41e-61			AT4G12830	AT4G12830	-3.53992	0	0
AT5G45180	FMO2	7.82354	1.79e-62	8.29e-62			AT4G03610	AT4G03610	-3.53683	3.62e-29	1.13e-28
AT1G15150	AT1G15150	7.82297	1.08e-259	1.47e-258			AT2G32150	AT2G32150	-3.53676	0	0
AT2G39510	AT2G39510	7.80429	3.49e-211	3.97e-210			AT5G26582	AT5G26582	-3.53609	5.26e-08	1.01e-07
AT2G38920	RF178	7.80146	1.98e-64	9.36e-64			AT2G39200	MLO12	-3.5357	1.21e-94	7.36e-94
AT5G18450	DREB2G	7.78468	1.47e-72	7.52e-72			AT1G76530	AT1G76530	-3.53566	9.75e-47	3.84e-46
AT3G23060	AT3G23060	7.77842	3.77e-173	3.61e-172			AT1G10340	AT1G10340	-3.53028	1.04e-238	1.31e-237
AT4G12210	AT4G12210	7.73988	2.43e-54	1.04e-53			AT4G22513	AT4G22513	-3.5292	0	0
AT5G50360	AT5G50360	7.73696	5.67e-151	4.85e-150			AT2G25735	AT2G25735	-3.52857	0	0
AT2G24800	PER18	7.72931	7.42e-166	6.82e-165			AT3G59310	AT3G59310	-3.52831	0	0
AT1G53480	MRD1	7.72072	1.81e-103	1.18e-102			AT2G29330	TRI	-3.5269	4.79e-115	3.36e-114
AT1G31510	AT1G31510	7.71307	4.24e-44	1.63e-43			AT1G73580	AT1G73580	-3.52591	1.19e-15	2.86e-15
AT5G45830	DOG1	7.70912	0	0			AT5G66080	AT5G66080	-3.51884	2.32e-201	2.55e-200
AT3G12470	AT3G12470	7.69504	1.23e-93	7.41e-93			AT1G09950	RAS1	-3.51746	1.07e-23	3.05e-23
AT3G60730	PME36	7.67118	0	0			AT2G01180	LPP1	-3.51597	0	0
AT5G09210	AT5G09210	7.66514	9.67e-61	4.41e-60			AT5G56540	AGP14	-3.51526	1.26e-190	1.32e-189
AT1G14940	AT1G14940	7.65892	9.93e-55	4.27e-54			AT3G57530	CPK32	-3.51479	0	0
AT3G47710	PRE4	7.65882	3.07e-84	1.73e-83			AT1G30750	AT1G30750	-3.5147	5.76e-95	3.52e-94
AT2G25340	VAMP712	7.65181	1.41e-53	6.02e-53			AT3G04640	AT3G04640	-3.50902	3.16e-130	2.43e-129
AT5G57200	AT5G57200	7.64813	9.64e-67	4.67e-66			AT5G45440	AT5G45440	-3.50208	2.18e-21	5.94e-21
AT4G27550	TPS4	7.64701	1.6e-116	1.14e-115			AT4G17340	TIP2-2	-3.50087	0	0
AT4G32500	AKT5	7.64446	1.3e-48	5.22e-48			AT5G23580	CPK12	-3.49897	3.88e-36	1.34e-35
AT1G16705	AT1G16705	7.6438	4.1e-192	4.31e-191			AT1G18290	AT1G18290	-3.49155	6.31e-33	2.08e-32
AT1G77100	PER13	7.63663	2.79e-54	1.19e-53			AT4G14450	AT4G14450	-3.48844	4.99e-66	2.4e-65
AT5G44430	PDF1.2C	7.63234	2.6e-77	1.39e-76			AT5G11070	AT5G11070	-3.48812	0	0
AT2G47120	SDR3C	7.61711	1.99e-44	7.66e-44			AT1G13650	AT1G13650	-3.48174	4.61e-82	2.56e-81
AT3G07920	AT3G07920	7.59502	4e-57	1.76e-56			AT4G17785	MYB39	-3.47902	1.63e-16	4e-16
AT1G60970	AT1G60970	7.57447	0	0			AT1G06930	AT1G06930	-3.47892	1.01e-19	2.66e-19
AT1G80090	PV42B	7.57002	7.85e-45	3.03e-44			AT1G78720	AT1G78720	-3.47656	5.2e-17	1.29e-16
AT2G47050	AT2G47050	7.56818	3.78e-88	2.19e-87			AT3G19580	AZF2	-3.47504	0	0
AT1G62710	bVPE	7.55914	0	0			AT1G24330	PUB6	-3.47487	7.62e-289	1.16e-287
AT5G24560	PP2B12	7.55822	1.2e-42	4.52e-42			AT5G22250	CAF1-11	-3.47474	0	0
AT1G80580	ERF084	7.54586	8.97e-39	3.21e-38			AT4G15990	AT4G15990	-3.47129	3.25e-149	2.75e-148
AT3G44830	PDAT2	7.52898	6.5e-105	4.27e-104			AT1G23940	AT1G23940	-3.47001	1.41e-22	3.93e-22
AT5G26805	AT5G26805	7.51145	8.92e-42	3.31e-41			AT4G05497	FBL9	-3.46581	4.26e-08	8.2e-08
AT5G53240	AT5G53240	7.50328	1.01e-58	4.53e-58			AT2G15030	AT2G15030	-3.46165	7.01e-25	2.04e-24
AT5G01120	AT5G01120	7.50184	2.46e-139	1.99e-138			AT5G05300	AT5G05300	-3.46059	6.15e-97	3.8e-96
AT3G21860	ASK10	7.49545	1.36e-57	6.03e-57			AT5G50180	AT5G50180	-3.45632	0	0
AT3G58060	MTPC3	7.49132	2.76e-116	1.96e-115			AT3G06950	AT3G06950	-3.45575	1.93e-274	2.79e-273
AT4G30880	AT4G30880	7.48594	9.44e-30	2.98e-29			AT3G10300	CML49	-3.45373	0	0
AT1G53690	NRPB12L	7.47734	7.12e-192	7.47e-191			AT5G28630	AT5G28630	-3.45177	2.84e-70	1.42e-69
AT2G01770	VIT1	7.45137	2.19e-163	1.99e-162			AT2G32140	AT2G32140	-3.45126	6.01e-97	3.72e-96
AT1G61800	GPT2	7.42781	0	0			AT4G22212	AT4G22212	-3.44659	4.56e-47	1.8e-46
AT3G26790	FUS3	7.42577	3.21e-31	1.03e-30			AT1G54890	AT1G54890	-3.43424	1.05e-72	5.37e-72
AT1G13609	AT1G13609	7.40348	3.42e-86	1.96e-85			AT1G52070	JAL10	-3.43334	0	0
AT2G34315	AT2G34315	7.39853	5.75e-46	2.25e-45			AT2G28160	FIT	-3.42903	2.45e-59	1.1e-58
AT1G21860	sks7	7.37767	3.39e-82	1.89e-81			AT5G61350	AT5G61350	-3.42759	2.71e-94	1.64e-93
AT4G31615	REM2	7.36795	0	0			AT1G69572	AT1G69572	-3.4274	2.79e-42	1.04e-41
AT3G50090	SDN4	7.36147	4.43e-41	1.63e-40			AT4G19920	AT4G19920	-3.42524	1.13e-23	3.21e-23
AT1G13620	RGF2	7.35206	0	0			AT5G66675	AT5G66675	-3.42168	0	0
AT4G33070	PDC1	7.34185	0	0			AT4G20235	CYP71A28	-3.42074	9.63e-15	2.25e-14
AT5G05020	AT5G05020	7.315	7.94e-50	3.25e-49			AT5G64905	PEP3	-3.4206	8.21e-59	3.67e-58
AT4G09595	AT4G09595	7.29783	1.67e-44	6.41e-44			AT5G08150	SOB5	-3.41957	5.65e-113	3.91e-112
AT3G28890	AtRLP43	7.28739	4.89e-163	4.43e-162			AT5G42180	PER64	-3.41838	1.1e-161	9.87e-161
AT4G04760	AT4G04760	7.25967	0	0			AT2G27500	AT2G27500	-3.41746	0	0
AT5G25470	AT5G25470	7.23506	4.09e-260	5.58e-259			AT1G69890	AT1G69890	-3.41549	0	0
AT4G18920	AT4G18920	7.22779	7.96e-31	2.55e-30			AT1G76190	AT1G76190	-3.41308	2.95e-20	7.88e-20
AT3G54510	AT3G54510	7.2241	5.85e-293	9.06e-292			AT3G23230	ERF098	-3.4119	2.91e-17	7.25e-17
AT5G43770	AT5G43770	7.21137	1.33e-157	1.17e-156			AT5G45200	AT5G45200	-3.40602	1.96e-37	6.9e-37
AT5G58460	CHX25	7.19239	3.92e-42	1.46e-41			AT1G56680	AT1G56680	-3.40458	9.51e-72	4.82e-71
AT3G49570	LSU3	7.17119	5.04e-140	4.09e-139			AT3G44326	AT3G44326	-3.39663	9.93e-70	4.93e-69
AT3G58210	AT3G58210	7.16244	9.21e-56	4e-55			AT5G34810	AT5G34810	-3.38779	4.93e-12	1.08e-11
AT1G52695	AT1G52695	7.16143	2.07e-41	7.67e-41			AT5G66390	PER72	-3.38645	0	0
AT1G67770	TEL2	7.1594	1.44e-119	1.04e-118			AT2G23810	TET8	-3.38635	0	0
AT4G18330	AT4G18330	7.15899	4.41e-61	2.02e-60			AT1G72610	GLP1	-3.3859	1.33e-63	6.26e-63
AT3G03660	WOX11	7.15625	4.54e-127	3.43e-126			AT1G66160	PUB20	-3.38536	0	0
AT2G47770	TSPO	7.15549	6.7e-59	3e-58			AT1G50732	AT1G50732	-3.37978	3.22e-262	4.42e-261
AT5G54560	AT5G54560	7.14675	4.91e-44	1.88e-43			AT3G01500	BCA1	-3.37802	0	0
AT3G47720	SRO4	7.14568	7.28e-52	3.04e-51			AT4G33610	AT4G33610	-3.37593	1.72e-101	1.1e-100
AT3G21500	DXPS1	7.14231	2.5e-45	9.69e-45			AT2G43610	AT2G43610	-3.37455	0	0
AT2G27240	ALMT7	7.12922	3.09e-63	1.44e-62			AT5G38420	RBCS-2B	-3.37243	0	0
AT3G51200	AT3G51200	7.12476	6.37e-37	2.22e-36			AT5G57560	XTH22	-3.36611	0	0
AT3G50980	XERO1	7.12063	5.67e-118	4.06e-117			AT5G44417	AT5G44417	-3.35248	6.22e-66	2.99e-65
AT5G09570	AT5G09570	7.11073	7.12e-107	4.73e-106			AT1G05660	AT1G05660	-3.35161	3.57e-36	1.23e-35
AT4G10490	AT4G10490	7.11066	2.18e-27	6.62e-27			AT3G01190	PER27	-3.35152	0	0
AT1G21529	AT1G21529	7.10648	3.69e-42	1.38e-41			AT5G53190	SWEET3	-3.35086	1.7e-14	3.97e-14
AT1G48130	PER1	7.10287	2.25e-28	6.96e-28			AT1G68190	AT1G68190	-3.34723	0	0
AT1G02770	AT1G02770	7.10084	0	0			AT5G45220	AT5G45220	-3.33625	1.25e-23	3.55e-23
AT2G47520	ERF071	7.09785	4.64e-190	4.83e-189			AT5G02160	AT5G02160	-3.33181	0	0
AT3G54450	NPF5.4	7.09785	3.28e-49	1.33e-48			AT5G64110	PER70	-3.32892	0	0
AT5G17810	WOX12	7.09437	2.67e-116	1.89e-115			AT4G15150	AT4G15150	-3.32621	3.13e-42	1.17e-41
AT5G53230	AT5G53230	7.0942	2.86e-59	1.28e-58			AT2G44340	VQ18	-3.32021	3.17e-08	6.13e-08
AT4G11340	AT4G11340	7.08839	1.07e-47	4.25e-47			AT5G35940	JAL41	-3.31881	3.03e-118	2.17e-117
AT5G50260	CEP1	7.08762	4.25e-245	5.45e-244			AT3G61190	BAP1	-3.31769	0	0
AT2G20825	ULT2	7.07821	3.17e-55	1.37e-54			AT4G34150	AT4G34150	-3.30946	0	0
AT2G42470	AT2G42470	7.07322	1.66e-31	5.37e-31			AT1G70920	ATHB-X	-3.3084	4.33e-32	1.41e-31
AT1G77120	ADH1	7.06309	0	0			AT3G44260	CAF1-9	-3.30378	0	0
AT1G55650	HMGB11	7.05368	8.34e-53	3.52e-52			AT2G35075	AT2G35075	-3.3035	3.36e-08	6.5e-08
AT5G56510	APUM12	7.05225	3.81e-124	2.83e-123			AT5G44973	AT5G44973	-3.2988	1.58e-07	2.98e-07
AT3G25080	AT3G25080	7.03587	1.22e-55	5.28e-55			AT1G24140	AT1G24140	-3.29868	8.79e-138	7.05e-137
AT4G22105	SCRL26	7.03544	4.64e-39	1.67e-38			AT2G28305	LOG1	-3.29769	1.72e-284	2.56e-283
AT3G19920	AT3G19920	7.03306	1.56e-65	7.44e-65			AT1G22690	GASA9	-3.29754	0	0
AT5G10120	EIL4	7.03231	7.4e-47	2.92e-46			AT4G36710	SCL15	-3.29611	0	0
AT5G63240	AT5G63240	7.02311	2.55e-33	8.45e-33			AT5G51990	DREB1D	-3.29501	4.17e-08	8.03e-08
AT1G76470	AT1G76470	7.019	0	0			AT4G25390	AT4G25390	-3.29425	0	0
AT2G18460	LCV3	6.99542	1.01e-80	5.52e-80			AT1G73300	SCPL2	-3.2919	3.02e-61	1.38e-60
AT1G22110	AT1G22110	6.97717	1.66e-249	2.17e-248			AT1G66270	BGLU21	-3.28713	0	0
AT5G38195	AT5G38195	6.95887	3.96e-34	1.33e-33			AT5G44350	AT5G44350	-3.28692	5.19e-146	4.33e-145
AT2G45130	SPX3	6.95593	4.89e-181	4.88e-180			AT3G04960	AT3G04960	-3.28229	1.27e-11	2.73e-11
AT5G56300	GAMT2	6.95528	9.9e-122	7.25e-121			AT5G64870	FLOT3	-3.27867	6.66e-98	4.15e-97
AT5G03860	MLS	6.94983	0	0			AT2G39530	AT2G39530	-3.27565	1.9e-57	8.4e-57
AT1G52696	AT1G52696	6.9427	2.51e-34	8.45e-34			AT5G64750	ABR1	-3.2742	1.06e-106	7.01e-106
AT4G33280	REM16	6.93761	6.51e-290	9.94e-289			AT1G47603	ATPUP19	-3.27289	5.32e-09	1.06e-08
AT1G08170	AT1G08170	6.92776	5.53e-38	1.96e-37			AT5G45070	PP2A8	-3.27193	2.3e-93	1.39e-92
AT1G11572	AT1G11572	6.92711	3.94e-36	1.36e-35			AT1G68110	AT1G68110	-3.27162	4.25e-32	1.39e-31
AT4G18900	AT4G18900	6.90613	5.77e-96	3.54e-95			AT3G45280	SYP72	-3.27078	3.29e-07	6.11e-07
AT2G17850	STR17	6.89654	2.94e-213	3.37e-212			AT5G05190	Y-1	-3.26788	1.59e-225	1.9e-224
AT4G01970	RFS4	6.88885	8.73e-180	8.67e-179			AT5G44065	AT5G44065	-3.26556	5.95e-10	1.22e-09
AT5G59320	LTP3	6.88803	0	0			AT1G33540	scpl18	-3.26525	1.2e-19	3.16e-19
AT1G17710	AT1G17710	6.86702	1.29e-296	2.02e-295			AT5G03130	AT5G03130	-3.26322	2.31e-07	4.32e-07
AT1G25270	AT1G25270	6.86516	4.9e-34	1.64e-33			AT5G66070	ATL27	-3.262	0	0
AT4G24000	CSLG2	6.84687	1.61e-43	6.12e-43			AT4G15290	CSLB5	-3.26043	6.08e-28	1.87e-27
AT1G73120	AT1G73120	6.84551	0	0			AT1G10070	BCAT2	-3.25989	0	0
AT5G53270	AT5G53270	6.84502	1.03e-36	3.57e-36			AT1G53885	AT1G53885	-3.25946	1.27e-262	1.75e-261
AT4G26460	AT4G26460	6.84494	1.23e-102	7.98e-102			AT4G13575	AT4G13575	-3.25894	6.59e-17	1.63e-16
AT4G11310	AT4G11310	6.82398	3.76e-33	1.24e-32			AT2G17660	AT2G17660	-3.25827	1.79e-89	1.05e-88
AT5G45880	AT5G45880	6.81774	1.02e-27	3.1e-27			AT5G63660	PDF2.5	-3.25777	1.95e-33	6.49e-33
AT4G37360	CYP81D2	6.81539	5.81e-32	1.89e-31			AT2G13360	AGT1	-3.25684	0	0
AT5G49180	PME58	6.81467	1.06e-32	3.48e-32			AT5G47740	AT5G47740	-3.25608	2.88e-112	1.99e-111
AT1G49475	AT1G49475	6.81423	2.4e-226	2.89e-225			AT2G40000	HSPRO2	-3.25066	0	0
AT3G27415	AT3G27415	6.81323	3.07e-40	1.12e-39			AT1G19050	ARR7	-3.24772	0	0
AT1G18100	MFT	6.80172	0	0			AT1G49570	PER10	-3.24558	5.96e-187	6.1e-186
AT3G23970	AT3G23970	6.79767	4.41e-37	1.54e-36			AT2G17330	CYP51G2	-3.24516	2.95e-13	6.64e-13
AT4G33560	AT4G33560	6.7949	0	0			AT1G20510	4CLL5	-3.24245	0	0
AT2G21260	AT2G21260	6.7585	0	0			AT1G52770	AT1G52770	-3.24068	2.09e-26	6.22e-26
AT5G57123	AT5G57123	6.74818	0	0			AT4G01540	NAC68	-3.23416	1.03e-262	1.41e-261
AT5G61412	AT5G61412	6.73874	1.91e-98	1.2e-97			AT3G10280	KCS14	-3.23371	3.77e-38	1.34e-37
AT5G10040	AT5G10040	6.72708	4.16e-78	2.23e-77			AT1G16140	WAKL3	-3.23198	3.99e-11	8.48e-11
AT2G41470	AT2G41470	6.71822	2.97e-89	1.73e-88			AT3G24520	HSFC1	-3.22729	0	0
AT3G49580	LSU1	6.69077	2.45e-210	2.78e-209			AT5G10230	ANNAT7	-3.2266	3.25e-23	9.19e-23
AT3G47190	AT3G47190	6.68509	4.88e-34	1.64e-33			AT1G21550	CML44	-3.22394	8.09e-95	4.92e-94
AT5G44630	BS	6.67915	1.37e-37	4.82e-37			AT5G37072	AT5G37072	-3.22361	2.71e-09	5.44e-09
AT2G23230	TPS05	6.67733	2.81e-28	8.67e-28			AT1G17420	LOX3	-3.21249	0	0
AT1G28030	AT1G28030	6.67611	8.05e-30	2.54e-29			AT2G14290	AT2G14290	-3.20608	4.11e-09	8.21e-09
AT2G06985	AT2G06985	6.67316	6.19e-33	2.04e-32			AT4G20860	AT4G20860	-3.20599	0	0
AT1G23110	AT1G23110	6.66608	2.29e-223	2.72e-222			AT5G38350	AT5G38350	-3.20388	8.23e-57	3.62e-56
AT5G19470	NUDT24	6.65708	6.48e-38	2.29e-37			AT1G53903	AT1G53903	-3.20189	5.16e-255	6.88e-254
AT2G32830	PHT1-5	6.64453	7.79e-292	1.2e-290			AT3G55230	DIR24	-3.20129	4.38e-233	5.4e-232
AT3G15605	AT3G15605	6.6421	7.17e-52	3e-51			AT3G48100	ARR5	-3.20065	0	0
AT5G07510	GRP14	6.6366	1.52e-46	5.97e-46			AT4G18880	HSFA4A	-3.20021	0	0
AT1G21290	AT1G21290	6.63239	9.82e-43	3.69e-42			AT3G55630	FPGS3	-3.19649	0	0
AT5G21150	AGO9	6.6271	0	0			AT2G24600	AT2G24600	-3.19612	0	0
AT1G24735	AT1G24735	6.61998	0	0			AT3G29280	AT3G29280	-3.18987	3.71e-36	1.28e-35
AT2G26020	PDF1.2B	6.61172	2.11e-108	1.41e-107			AT1G66090	AT1G66090	-3.1863	2.42e-293	3.74e-292
AT2G28420	AT2G28420	6.60121	1.14e-290	1.75e-289			AT3G19390	AT3G19400	-3.18589	0	0
AT3G12820	AtMYB10	6.58012	1.49e-172	1.42e-171			AT4G37400	CYP81F3	-3.18417	1.85e-62	8.56e-62
AT2G27250	CLV3	6.57543	1.28e-72	6.54e-72			AT4G30450	AT4G30450	-3.18355	7.38e-193	7.78e-192
AT5G05340	PER52	6.56541	3.78e-68	1.85e-67			AT1G15380	AT1G15380	-3.18229	0	0
AT3G61340	AT3G61340	6.55469	1.4e-117	1e-116			AT4G16680	AT4G16680	-3.17929	0	0
AT1G23160	AT1G23160	6.55081	2.52e-218	2.94e-217			AT4G39710	PNSL4	-3.1743	0	0
AT2G44800	AT2G44800	6.54301	1.09e-126	8.22e-126			AT2G25160	CYP82F1	-3.1708	4.59e-57	2.02e-56
AT5G07480	KUOX1	6.53781	1.42e-31	4.6e-31			AT4G22485	AT4G22485	-3.1701	3.44e-68	1.68e-67
AT4G13700	ATPAP23	6.51288	2.13e-42	7.98e-42			AT1G72930	TIR	-3.16839	0	0
AT5G63230	AT5G63230	6.51109	9.67e-26	2.85e-25			AT5G59520	ZIP2	-3.1657	1.49e-66	7.18e-66
AT3G15370	EXPA12	6.5019	4.28e-98	2.67e-97			AT3G54020	IPCS1	-3.1604	0	0
AT5G16700	AT5G16700	6.48655	2.23e-32	7.31e-32			AT3G49845	AT3G49845	-3.15967	9.71e-43	3.65e-42
AT4G02690	AT4G02690	6.43675	2.56e-25	7.49e-25			AT1G14480	AT1G14480	-3.15791	1.15e-175	1.12e-174
AT5G53870	ENODL1	6.43667	0	0			AT2G23400	AT2G23400	-3.15355	7.19e-09	1.42e-08
AT1G49330	AT1G49330	6.42501	1.02e-71	5.17e-71			AT3G18777	AT3G18777	-3.15084	6.38e-09	1.26e-08
AT4G39480	CYP96A9	6.42469	5.13e-67	2.49e-66			AT1G35240	ARF20	-3.14925	1.12e-13	2.55e-13
AT3G07250	AT3G07250	6.42415	3.77e-105	2.48e-104			AT4G15700	GRXS3	-3.14672	8.69e-156	7.6e-155
AT5G65510	AIL7	6.41719	2.13e-306	3.44e-305			AT1G71740	AT1G71740	-3.14079	5.65e-34	1.89e-33
AT2G33690	AT2G33690	6.4148	2.21e-28	6.84e-28			AT1G29920	LHCB1.2	-3.13945	0	0
AT1G62530	AT1G62530	6.40754	3.21e-36	1.11e-35			AT4G22505	AT4G22505	-3.13904	7.65e-75	3.99e-74
AT3G28570	AT3G28570	6.39724	1.87e-65	8.94e-65			AT5G06865	AT5G06865	-3.13749	4.14e-08	7.98e-08
AT5G16023	RTFL18	6.39529	5.13e-34	1.72e-33			AT5G45210	AT5G45210	-3.13259	1.56e-41	5.79e-41
AT4G01980	AT4G01980	6.3843	3.86e-63	1.8e-62			AT2G31880	SOBIR1	-3.13149	0	0
AT1G73175	AT1G73175	6.38196	3.11e-59	1.4e-58			AT2G42760	AT2G42760	-3.13039	1.02e-173	9.88e-173
AT5G39720	AIG2L	6.36976	4.47e-238	5.61e-237			AT5G24410	PGL4	-3.12708	5.21e-52	2.18e-51
AT1G78760	AT1G78760	6.35314	2.73e-134	2.15e-133			AT3G52800	SAP6	-3.1231	0	0
AT1G69880	TRX8	6.35256	0	0			AT3G45640	MPK3	-3.12272	0	0
AT5G65100	EIL5	6.34955	1.43e-32	4.69e-32			AT1G10110	AT1G10110	-3.1192	4.34e-18	1.1e-17
AT4G39610	AT4G39610	6.34945	8.93e-46	3.49e-45			AT1G50060	AT1G50060	-3.11156	2.01e-53	8.55e-53
AT2G43860	AT2G43860	6.34063	2.85e-28	8.78e-28			AT1G72910	AT1G72910	-3.10605	2.09e-259	2.84e-258
AT5G52160	AT5G52160	6.33343	2.17e-27	6.57e-27			AT3G21870	CYCU1-1	-3.10529	7.18e-131	5.54e-130
AT4G32100	AT4G32100	6.33342	2.2e-25	6.45e-25			AT4G18950	AT4G18950	-3.10479	0	0
AT3G47420	ATPS3	6.32876	0	0			AT1G43590	AT1G43590	-3.10371	4.38e-68	2.14e-67
AT1G66360	AT1G66360	6.32731	2.38e-25	6.97e-25			AT3G50640	AT3G50640	-3.10134	1.11e-107	7.43e-107
AT4G14780	AT4G14780	6.3267	0	0			AT5G14740	BCA2	-3.10087	0	0
AT4G27530	AT4G27530	6.32643	1.07e-84	6.09e-84			AT5G21430	ndhU	-3.09952	0	0
AT5G62400	AT5G62400	6.32437	3.39e-68	1.66e-67			AT1G17147	VQ1	-3.09945	6.11e-165	5.58e-164
AT1G02790	PGA3	6.31953	4.34e-21	1.17e-20			AT4G03480	AT4G03480	-3.09528	4.94e-08	9.49e-08
AT3G27785	MYB118	6.31176	7.57e-24	2.16e-23			AT4G29690	AT4G29690	-3.09525	3.74e-163	3.39e-162
AT3G15830	AT3G15830	6.29803	1.38e-63	6.47e-63			AT1G27100	AT1G27100	-3.09466	0	0
AT5G09470	PUMP6	6.29015	1.4e-41	5.2e-41			AT5G38410	RBCS-3B	-3.09356	0	0
AT1G10680	ABCB10	6.27581	7.48e-24	2.13e-23			AT4G17500	ERF1A	-3.08589	0	0
AT3G03620	AT3G03620	6.27468	8.69e-25	2.52e-24			AT1G05260	PER3	-3.08353	2.01e-255	2.69e-254
AT2G33460	RIC1	6.2744	7.64e-134	5.98e-133			AT1G30520	AAE14	-3.08283	0	0
AT4G23150	CRK7	6.26739	7.56e-80	4.11e-79			AT2G44500	AT2G44500	-3.07712	0	0
AT5G39890	PCO2	6.26175	0	0			AT2G12646	AT2G12646	-3.07708	1.98e-53	8.4e-53
AT2G03520	UPS4	6.25908	1.02e-71	5.17e-71			AT3G56890	AT3G56890	-3.07701	6.55e-08	1.25e-07
AT5G60470	IDD13	6.24793	5.74e-44	2.19e-43			AT5G52100	DAPB3	-3.07693	0	0
AT1G63070	AT1G63070	6.2449	3.09e-139	2.5e-138			AT1G53870	AT1G53870	-3.07674	6.48e-102	4.16e-101
AT1G66770	SWEET6	6.24173	1.1e-27	3.35e-27			AT1G73290	scpl5	-3.07424	1.33e-22	3.72e-22
AT3G48620	AT3G48620	6.23215	1e-27	3.06e-27			AT1G72920	AT1G72920	-3.07199	1.21e-259	1.65e-258
AT4G10265	AT4G10265	6.22395	8.21e-45	3.17e-44			AT2G25780	AT2G25780	-3.07095	1.94e-100	1.23e-99
AT2G41850	ADPG2	6.22196	1.18e-78	6.36e-78			AT3G48390	AT3G48390	-3.0703	0	0
AT5G52500	AT5G52500	6.21862	8.37e-28	2.56e-27			AT5G07070	CIPK2	-3.06966	3.35e-100	2.12e-99
AT2G23220	CYP81D6	6.21339	1.11e-29	3.51e-29			AT5G26320	AT5G26320	-3.06678	1.69e-08	3.31e-08
AT3G61040	CYP76C7	6.20483	3.56e-24	1.02e-23			AT3G01175	AT3G01175	-3.06187	2.25e-37	7.89e-37
AT5G60250	AT5G60250	6.18803	0	0			AT2G39470	PNSL1	-3.05743	0	0
AT2G29380	HAI3	6.18047	4.54e-34	1.52e-33			AT2G03240	PHO1-H5	-3.05474	0	0
AT5G14340	AtMYB40	6.1618	9.71e-186	9.88e-185			AT1G53890	AT1G53890	-3.0547	2.28e-99	1.43e-98
AT5G44700	GSO2	6.15264	0	0			AT4G39580	AT4G39580	-3.05233	6.48e-63	3.02e-62
AT5G22460	AT5G22460	6.14839	7.68e-133	5.98e-132			AT1G10155	ATPP2-A10	-3.04949	1.2e-08	2.36e-08
AT1G67220	HAC2	6.13713	3.75e-63	1.75e-62			AT5G17960	AT5G17960	-3.04755	7.55e-15	1.77e-14
AT2G24255	AT2G24255	6.12984	3.74e-42	1.4e-41			AT1G23710	AT1G23710	-3.04545	0	0
AT2G25150	SCT	6.12465	2.87e-142	2.36e-141			AT5G38344	AT5G38344	-3.04532	1.17e-30	3.73e-30
AT4G02780	GA1	6.12313	1.21e-215	1.39e-214			AT1G21945	AT1G21945	-3.04488	2.07e-09	4.17e-09
AT1G51020	AT1G51020	6.11735	1.71e-30	5.44e-30			AT3G11090	LBD21	-3.04212	7.64e-113	5.29e-112
AT1G01305	AT1G01305	6.11552	3.41e-25	9.96e-25			AT3G59350	PTI13	-3.04142	0	0
AT3G61660	AT3G61660	6.10298	2.88e-69	1.43e-68			AT1G34100	AT1G34100	-3.04109	1.18e-09	2.39e-09
AT5G57390	AIL5	6.10131	0	0			AT3G14260	AT3G14260	-3.03944	1.75e-76	9.25e-76
AT5G13130	AT5G13130	6.09473	6.01e-141	4.9e-140			AT5G66210	CPK28	-3.03519	0	0
AT5G41765	AT5G41765	6.09391	6.6e-65	3.13e-64			AT4G13560	UNE15	-3.03369	1.04e-06	1.9e-06
AT2G26450	PME13	6.08265	8.5e-163	7.68e-162			AT3G06390	AT3G06390	-3.03251	2.08e-198	2.24e-197
AT5G55270	AT5G55270	6.06932	1.82e-43	6.92e-43			AT2G04790	AT2G04790	-3.03085	1.17e-163	1.06e-162
AT1G80130	AT1G80130	6.06047	9.52e-104	6.21e-103			AT1G51330	AT1G51330	-3.02687	2.68e-06	4.81e-06
AT4G17980	anac071	6.05186	8.16e-74	4.21e-73			AT5G32460	AT5G32460	-3.02636	6.46e-10	1.32e-09
AT5G12910	AT5G12910	6.03948	2.94e-27	8.9e-27			AT1G19150	LHCA6	-3.02329	0	0
AT1G35910	TPPD	6.02624	2.54e-285	3.8e-284			AT4G24015	RHA4A	-3.01969	2.91e-126	2.18e-125
AT4G00416	MBD3	6.0245	1.21e-50	4.99e-50			AT1G20823	ATL80	-3.01963	1.16e-249	1.52e-248
AT1G06080	ADS1	6.008	0	0			AT1G23760	JP630	-3.0195	4.19e-47	1.66e-46
AT3G52780	PAP20	6.00307	1e-66	4.86e-66			AT4G37860	AT4G37860	-3.01928	2.3e-06	4.14e-06
AT2G29090	CYP707A2	5.99042	1.94e-222	2.3e-221			AT1G72450	TIFY11B	-3.01897	0	0
AT1G63210	AT1G63210	5.99023	6.64e-25	1.93e-24			AT5G56910	AT5G56910	-3.01886	2.48e-274	3.58e-273
AT3G62610	ATMYB11	5.98276	4.46e-28	1.37e-27			AT4G13570	HTA4	-3.01864	8.54e-07	1.56e-06
AT5G44420	PDF1.2A	5.9781	4.04e-97	2.51e-96			AT5G51780	BHLH36	-3.01664	4.63e-138	3.72e-137
AT5G48850	SDI1	5.96907	0	0			AT4G02090	AT4G02090	-3.01075	2.14e-44	8.22e-44
AT1G24580	AT1G24580	5.9685	7.57e-149	6.4e-148			AT4G11050	AtGH9C3	-3.01016	1.52e-08	2.97e-08
AT1G24470	KCR2	5.96494	2.82e-301	4.46e-300			AT5G63270	AT5G63270	-3.00845	2.11e-20	5.65e-20
AT4G24030	AT4G24030	5.95604	1.64e-29	5.16e-29			AT1G06830	GRXS11	-3.00372	1.37e-115	9.63e-115
AT2G07070	AT2G07070	5.9372	3.92e-28	1.21e-27			AT5G08600	AT5G08600	-3.0036	7.54e-72	3.82e-71
AT2G29350	SAG13	5.9332	8.35e-215	9.63e-214			AT1G65800	SD16	-3.00139	0	0
AT5G27060	AtRLP53	5.93121	2.11e-95	1.29e-94			AT1G71520	ERF020	-3.00056	5.48e-19	1.42e-18
AT1G02040	AT1G02040	5.9295	2.43e-40	8.88e-40			AT4G19925	AT4G19925	-2.99979	3.18e-06	5.69e-06
AT1G62500	AT1G62500	5.90518	0	0			AT1G43650	AT1G43650	-2.99627	7.19e-83	4.02e-82
AT1G48530	AT1G48530	5.90027	2.39e-64	1.13e-63			AT4G22490	AT4G22490	-2.99514	0	0
AT3G08860	PYD4	5.89137	0	0			AT5G54370	AT5G54370	-2.99232	6.74e-266	9.37e-265
AT1G71160	KCS7	5.88917	3.13e-22	8.67e-22			AT1G45140	AT1G45140	-2.9909	3.83e-06	6.83e-06
AT2G36660	PAB7	5.88558	0	0			AT2G31018	AT2G31018	-2.98623	6.95e-07	1.28e-06
AT1G12130	AT1G12130	5.88033	8.92e-70	4.44e-69			AT3G01440	PNSL3	-2.98501	0	0
AT2G25470	AtRLP21	5.87086	2.7e-82	1.5e-81			AT2G02640	AT2G02640	-2.98373	1.34e-14	3.13e-14
AT1G12070	AT1G12070	5.86397	2.46e-169	2.31e-168			AT1G19180	TIFY10A	-2.98045	0	0
AT4G26466	LRE	5.85887	1.59e-58	7.08e-58			AT1G43600	AT1G43600	-2.98008	8.84e-06	1.55e-05
AT1G63340	AT1G63340	5.85299	4.89e-43	1.84e-42			AT4G19530	AT4G19530	-2.97929	0	0
AT5G51490	PME59	5.84366	0	0			AT2G26500	AT2G26500	-2.97919	0	0
AT1G01580	FRO2	5.83304	6.9e-71	3.47e-70			AT5G62520	SRO5	-2.97817	0	0
AT5G55370	AT2	5.82949	1.4e-86	8.06e-86			AT4G18010	IP5P2	-2.97631	0	0
AT5G11320	YUC4	5.8046	2.68e-77	1.43e-76			AT2G36710	PME15	-2.97507	8.14e-06	1.43e-05
AT4G05370	AT4G05370	5.79974	1.11e-29	3.51e-29			AT2G31085	CLE6	-2.97276	4.65e-21	1.26e-20
AT2G47780	AT2G47780	5.7945	2.79e-73	1.43e-72			AT2G35130	AT2G35130	-2.97128	0	0
AT3G02410	ICMEL2	5.79108	2.28e-240	2.89e-239			AT2G22750	BHLH18	-2.96495	7.45e-07	1.37e-06
AT2G44460	BGLU28	5.79091	0	0			AT4G07820	AT4G07820	-2.9615	3.68e-08	7.1e-08
AT3G01600	anac044	5.78438	0	0			AT2G33205	AT2G33205	-2.96079	1.05e-25	3.1e-25
AT1G09370	AT1G09370	5.78374	3.67e-37	1.29e-36			AT3G29780	RALFL27	-2.95863	1.23e-34	4.15e-34
AT4G18620	PYL13	5.77701	2.37e-25	6.93e-25			AT5G45150	RTL3	-2.95763	1.39e-19	3.66e-19
AT1G68240	BHLH109	5.76795	9.37e-35	3.18e-34			AT1G73165	CLE1	-2.95758	5.19e-07	9.57e-07
AT5G26890	AT5G26890	5.71418	4.68e-20	1.24e-19			AT3G56000	CSLA14	-2.95402	5.04e-100	3.19e-99
AT3G56970	ORG2	5.71279	2.4e-44	9.23e-44			AT3G48940	AT3G48940	-2.95367	6.06e-09	1.2e-08
AT4G01975	AT4G01975	5.71079	1.39e-47	5.53e-47			AT5G24420	PGL5	-2.9525	4e-188	4.12e-187
AT5G61630	AT5G61630	5.68775	7.43e-21	2.01e-20			AT3G07070	AT3G07070	-2.95234	9.72e-26	2.86e-25
AT5G51850	AT5G51850	5.68296	0	0			AT1G73540	NUDT21	-2.94828	0	0
AT5G37150	AT5G37150	5.67901	9.33e-19	2.41e-18			AT5G20250	RFS6	-2.9443	0	0
AT1G12600	UTR4	5.67696	6.47e-259	8.76e-258			AT1G78070	AT1G78070	-2.94298	0	0
AT4G18660	AT4G18660	5.65997	1.45e-22	4.03e-22			AT2G35980	YLS9	-2.93367	3.9e-47	1.54e-46
AT5G44940	AT5G44940	5.65917	1.43e-27	4.34e-27			AT1G71400	RLP12	-2.93288	0	0
AT4G14695	MPC2	5.65829	8.05e-278	1.18e-276			AT4G17220	MAP70.5	-2.92948	2.02e-38	7.2e-38
AT2G42990	AT2G42990	5.65641	5.17e-48	2.07e-47			AT1G11340	RKS1	-2.92498	3.77e-177	3.7e-176
AT2G25130	AT2G25130	5.65335	3.7e-147	3.1e-146			AT1G05540	AT1G05540	-2.92421	2.36e-10	4.9e-10
AT4G15370	BARS1	5.64859	4.89e-115	3.43e-114			AT5G20230	BCB	-2.92407	0	0
AT3G55870	AT3G55870	5.64033	2.06e-18	5.27e-18			AT4G35210	AT4G35210	-2.92169	7.59e-07	1.39e-06
AT2G38340	DREB2E	5.61836	1.22e-63	5.72e-63			AT5G04340	ZAT6	-2.92165	0	0
AT5G64210	AOX2	5.61743	9.89e-52	4.13e-51			AT3G17690	CNGC19	-2.92022	9.74e-44	3.71e-43
AT1G29090	AT1G29090	5.61447	2.15e-80	1.17e-79			AT1G34760	GRF11	-2.91995	9.64e-78	5.16e-77
AT2G40790	CXXS2	5.60853	1.96e-45	7.63e-45			AT2G41100	CML12	-2.91767	0	0
AT1G22600	AT1G22600	5.60255	2.73e-89	1.6e-88			AT1G64000	WRKY56	-2.91651	7.82e-21	2.11e-20
AT5G66980	AT5G66980	5.5902	9.03e-28	2.76e-27			AT5G38320	AT5G38320	-2.91488	3.03e-31	9.76e-31
AT2G43371	AT2G43371	5.58885	1.09e-20	2.93e-20			AT5G45680	FKBP13	-2.91108	0	0
AT5G10000	FD4	5.58149	2.93e-21	7.96e-21			AT5G10946	AT5G10946	-2.90999	3.03e-67	1.47e-66
AT5G55250	IAMT1	5.57753	0	0			AT1G63055	AT1G63055	-2.90996	2.07e-09	4.17e-09
AT5G62850	SWEET5	5.55566	0	0			AT4G23810	WRKY53	-2.90615	1.23e-164	1.12e-163
AT5G20150	SPX1	5.55481	0	0			AT5G65340	AT5G65340	-2.90573	4.99e-07	9.21e-07
AT5G53820	AT5G53820	5.54715	8.27e-91	4.89e-90			AT1G68010	HPR	-2.90118	0	0
AT5G61610	AT5G61610	5.52489	1.78e-271	2.54e-270			AT5G38930	AT5G38930	-2.89978	4.57e-35	1.55e-34
AT3G28857	PRE5	5.51972	8.12e-49	3.29e-48			AT1G14150	PNSL2	-2.89897	0	0
AT3G45130	LAS1	5.51808	1.78e-205	1.99e-204			AT4G22810	AHL24	-2.89425	7.95e-107	5.28e-106
AT1G64405	AT1G64405	5.51473	1.33e-196	1.43e-195			AT4G18205	PUP21	-2.8939	0	0
AT3G14950	TTL2	5.5025	1.27e-63	5.98e-63			AT4G12720	NUDT7	-2.89123	0	0
AT5G49190	SUS2	5.50132	0	0			AT5G59730	ATEXO70H7	-2.89099	7.65e-68	3.74e-67
AT3G28155	AT3G28155	5.50032	1.14e-74	5.91e-74			AT4G22610	AT4G22610	-2.89066	6.14e-185	6.24e-184
AT1G23201	AT1G23201	5.49567	3.38e-28	1.04e-27			AT3G14530	GGPPS9	-2.89063	1.55e-19	4.07e-19
AT5G64080	AT5G64080	5.48689	0	0			AT1G79700	AT1G79700	-2.89005	0	0
AT1G26390	AT1G26390	5.47924	2.94e-29	9.2e-29			AT1G33813	AT1G33813	-2.88855	1.65e-05	2.86e-05
AT1G47980	AT1G47980	5.47526	8.32e-47	3.28e-46			AT5G22410	PER60	-2.88635	1.45e-47	5.78e-47
AT1G65330	PHE1	5.46984	3.76e-63	1.76e-62			AT1G32928	AT1G32928	-2.88353	0	0
AT3G19700	IKU2	5.46915	5.88e-22	1.62e-21			AT1G70581	AT1G70581	-2.87927	1.75e-28	5.43e-28
AT5G05290	EXPA2	5.45726	4.28e-22	1.18e-21			AT2G39040	PER24	-2.87837	1.11e-31	3.6e-31
AT5G14490	anac085	5.45279	6.32e-39	2.27e-38			AT2G22990	SCPL8	-2.87158	0	0
AT5G24660	LSU2	5.45063	0	0			AT5G06820	SRF2	-2.86904	8.49e-21	2.29e-20
AT1G16850	AT1G16850	5.44391	0	0			AT3G16690	SWEET16	-2.86828	2.67e-198	2.87e-197
AT1G04645	AT1G04645	5.44322	1.72e-18	4.41e-18			AT3G25990	GT-4	-2.86714	5.09e-11	1.08e-10
AT1G61440	AT1G61440	5.43193	1.9e-168	1.77e-167			AT1G32080	PLGG1	-2.86473	0	0
AT2G11810	MGD3	5.42824	0	0			AT1G11450	AT1G11450	-2.86455	1.88e-203	2.07e-202
AT4G01985	AT4G01985	5.41238	1.99e-103	1.29e-102			AT4G33920	AT4G33920	-2.86282	0	0
AT5G65080	MAF5	5.40704	0	0			AT3G51970	ASAT1	-2.85926	4.57e-63	2.13e-62
AT2G24000	SCPL22	5.40394	7.21e-24	2.06e-23			AT5G26920	CBP60G	-2.85859	3.92e-290	5.99e-289
AT1G16770	AT1G16770	5.39939	8.26e-195	8.8e-194			AT4G21970	AT4G21970	-2.85834	5.61e-10	1.15e-09
AT2G16060	AHB1	5.39135	0	0			AT3G26165	CYP71B18	-2.85789	3.67e-193	3.88e-192
AT1G27040	NPF4.5	5.38273	1.14e-40	4.16e-40			AT2G01590	CRR3	-2.85564	0	0
AT2G02120	PDF2.1	5.37317	0	0			AT4G08100	AT4G08100	-2.85504	3.03e-27	9.17e-27
AT4G01265	AT4G01265	5.36802	2.84e-28	8.77e-28			AT1G70760	ndhL	-2.85462	0	0
AT3G11050	FER2	5.36601	0	0			AT5G28080	WNK9	-2.85425	2.05e-81	1.13e-80
AT4G14980	AT4G14980	5.3651	2.02e-214	2.33e-213			AT1G09575	AT1G09575	-2.85332	2.33e-199	2.53e-198
AT1G73010	PS2	5.35669	0	0			AT2G36540	AT2G36540	-2.85323	7.33e-10	1.5e-09
AT1G71690	AT1G71690	5.35554	1.28e-15	3.07e-15			AT4G39890	RABH1C	-2.84937	6.85e-126	5.14e-125
AT5G17970	AT5G17970	5.35369	6.11e-24	1.75e-23			AT1G64065	AT1G64065	-2.84708	7.93e-183	7.97e-182
AT4G09590	NHL22	5.34293	9.63e-18	2.43e-17			AT5G13700	PAO1	-2.84639	1.26e-78	6.76e-78
AT3G14360	AT3G14360	5.3396	0	0			AT1G23510	AT1G23510	-2.84557	7.8e-08	1.49e-07
AT5G07560	GRP20	5.33851	8.69e-48	3.47e-47			AT1G14160	AT1G14160	-2.84509	1.04e-34	3.52e-34
AT5G55150	AT5G55150	5.33191	8.71e-25	2.52e-24			AT4G18510	CLE2	-2.84318	3.37e-44	1.29e-43
AT4G33870	PER48	5.32103	1.45e-19	3.82e-19			AT1G11960	AT1G11960	-2.84171	0	0
AT5G17430	BBM	5.32091	0	0			AT3G03500	AT3G03500	-2.83649	8.22e-42	3.06e-41
AT5G38197	AT5G38197	5.32015	3.38e-17	8.43e-17			AT5G54790	AT5G54790	-2.83561	2.09e-08	4.07e-08
AT3G28360	ABCB16	5.31854	2.47e-54	1.06e-53			AT4G19520	AT4G19520	-2.83487	0	0
AT1G73560	AT1G73560	5.30675	2.06e-23	5.85e-23			AT1G52650	AT1G52650	-2.82935	1.07e-06	1.95e-06
AT3G44290	NAC60	5.2941	0	0			AT4G20000	AT4G20000	-2.82912	7.5e-63	3.49e-62
AT1G13610	AT1G13610	5.29201	6.41e-33	2.11e-32			AT3G16250	PNSB3	-2.82816	0	0
AT1G24010	AT1G24010	5.28843	3.89e-19	1.01e-18			AT3G51330	AT3G51330	-2.82806	0	0
AT1G51470	TGG5	5.28759	0	0			AT3G23080	AT3G23080	-2.82368	0	0
AT1G23730	BCA3	5.28671	0	0			AT3G27540	AT3G27540	-2.82295	6.08e-201	6.65e-200
AT1G34392	AT1G34392	5.28035	1.48e-16	3.64e-16			AT5G45110	NPR3	-2.82287	0	0
AT3G17203	GA2OX5	5.27673	5.34e-18	1.36e-17			AT5G66660	AT5G66660	-2.82208	2.2e-05	3.78e-05
AT4G19380	FAO4A	5.27638	0	0			AT5G59820	ZAT12	-2.82206	0	0
AT2G19590	ACO1	5.26911	0	0			AT4G08450	AT4G08450	-2.82121	2.51e-16	6.13e-16
AT2G30560	AT2G30560	5.26194	2.7e-22	7.49e-22			AT5G38430	RBCS-1B	-2.81563	0	0
AT3G11260	WOX5	5.26052	3.36e-203	3.71e-202			AT4G13810	AtRLP47	-2.8154	0	0
AT5G61890	ERF114	5.25877	1.69e-76	8.93e-76			AT4G21650	AT4G21650	-2.8133	4.17e-81	2.29e-80
AT5G63750	ARI13	5.25769	3.15e-83	1.77e-82			AT4G14140	MET4	-2.80664	5.22e-47	2.06e-46
AT5G63350	AT5G63350	5.24422	9.77e-206	1.09e-204			AT1G22460	AT1G22460	-2.80292	5.31e-17	1.32e-16
AT5G57260	CYP71B10	5.242	2.9e-27	8.78e-27			AT5G09660	PMDH2	-2.80243	0	0
AT5G37950	AT5G37950	5.24131	5.81e-22	1.6e-21			AT4G08115	AT4G08115	-2.80141	1.15e-28	3.58e-28
AT1G68290	ENDO2	5.23966	0	0			AT2G44920	AT2G44920	-2.799	0	0
AT3G17790	PAP17	5.23649	0	0			AT1G56510	WRR4	-2.79661	0	0
AT5G34871	AT5G34871	5.23503	6.1e-27	1.83e-26			AT5G62420	AT5G62420	-2.79649	3.53e-09	7.06e-09
AT4G18990	XTH29	5.23247	3.47e-78	1.86e-77			AT3G57450	AT3G57450	-2.79467	1.31e-275	1.9e-274
AT5G09360	LAC14	5.22825	4.83e-52	2.02e-51			AT2G40113	AT2G40113	-2.79217	5.98e-41	2.2e-40
AT1G23300	AT1G23300	5.22666	8.45e-17	2.08e-16			AT3G05890	RCI2B	-2.79112	8.29e-287	1.25e-285
AT3G53232	RTFL1	5.21564	5.75e-82	3.19e-81			AT3G50260	ERF011	-2.78779	7.46e-166	6.85e-165
AT4G28420	AT4G28420	5.21551	1.24e-36	4.31e-36			AT3G19240	AT3G19240	-2.78768	0	0
AT3G58200	AT3G58200	5.21193	4.39e-214	5.05e-213			AT3G48090	EDS1	-2.78754	0	0
AT4G36280	AT4G36280	5.20404	0	0			AT1G30360	ERD4	-2.78455	0	0
AT5G46540	ABCB7	5.20171	4.93e-15	1.16e-14			AT2G43670	AT2G43670	-2.78443	1.46e-23	4.15e-23
AT1G30220	INT2	5.19854	3.15e-272	4.51e-271			AT4G29670	ACHT2	-2.78431	0	0
AT1G78390	NCED9	5.18486	3.11e-103	2.02e-102			AT5G10380	ATL55	-2.78232	2.34e-177	2.3e-176
AT3G17130	AT3G17130	5.18359	7.73e-23	2.17e-22			AT3G13210	AT3G13210	-2.77786	2.05e-14	4.76e-14
AT1G51010	AT1G51010	5.17844	2.62e-19	6.85e-19			AT2G32030	AT2G32030	-2.77441	3.09e-167	2.86e-166
AT1G54020	AT1G54020	5.17667	2.22e-170	2.1e-169			AT3G14517	AT3G14517	-2.77434	3e-14	6.94e-14
AT2G04500	AT2G04500	5.17336	1.26e-160	1.12e-159			AT2G16380	SFH7	-2.77428	0	0
AT2G14520	CBSDUF3	5.16923	0	0			AT5G55570	AT5G55570	-2.7715	3.37e-36	1.17e-35
AT1G23700	AT1G23700	5.16711	5.64e-72	2.86e-71			AT5G14020	AT5G14020	-2.76897	9.69e-38	3.42e-37
AT3G19530	AT3G19530	5.15944	2.61e-35	8.9e-35			AT5G57640	AT5G57640	-2.76762	1.59e-89	9.33e-89
AT5G41830	AT5G41830	5.15873	1.81e-27	5.49e-27			AT3G57520	RFS2	-2.76722	0	0
AT1G26680	REM17	5.15558	3.23e-284	4.81e-283			AT1G11260	STP1	-2.76465	0	0
AT1G30660	T5I8.11	5.15349	7.94e-141	6.47e-140			AT5G28917	AT5G28917	-2.76426	3.17e-05	5.41e-05
AT2G33020	AtRLP24	5.14552	4.66e-83	2.61e-82			AT2G30280	RDM4	-2.76319	3.9e-139	3.15e-138
AT2G18660	EGC2	5.14055	2.39e-138	1.92e-137			AT3G55330	PPL1	-2.76256	0	0
AT4G12870	AT4G12870	5.13787	8.79e-175	8.5e-174			AT1G78280	AT1G78280	-2.76183	0	0
AT4G15396	CYP702A6	5.13081	0	0			AT1G67470	AT1G67470	-2.75924	4.12e-293	6.38e-292
AT1G27560	AT1G27560	5.12444	1.34e-106	8.89e-106			AT2G39570	ACR9	-2.75791	0	0
AT1G08090	NRT2.1	5.12135	8.06e-39	2.89e-38			AT1G56060	AT1G56060	-2.75675	1.2e-25	3.53e-25
AT2G44590	DRP1D	5.1181	1.35e-116	9.61e-116			AT4G17230	SCL13	-2.75649	0	0
AT2G14900	GASA7	5.11175	0	0			AT3G23100	XRCC4	-2.75598	2.04e-84	1.15e-83
AT4G00380	FDM2	5.11051	0	0			AT5G66052	AT5G66052	-2.75429	0	0
AT3G60140	BGLU30	5.10767	0	0			AT1G28380	NSL1	-2.75375	0	0
AT3G29150	AT3G29150	5.10606	5.27e-17	1.31e-16			AT5G53490	AT5G53490	-2.75119	0	0
AT5G41460	AT5G41460	5.10569	0	0			AT3G57640	AT3G57640	-2.75105	4.54e-128	3.44e-127
AT5G48130	AT5G48130	5.09838	1.67e-71	8.44e-71			AT4G11780	AT4G11780	-2.74666	1.52e-14	3.53e-14
AT5G15120	PCO1	5.09584	0	0			AT3G47650	AT3G47650	-2.74602	0	0
AT4G14819	AT4G14819	5.08978	1.15e-25	3.39e-25			AT1G75000	AT1G75000	-2.7459	8.82e-127	6.65e-126
AT3G03230	AT3G03230	5.08705	1.35e-17	3.4e-17			AT1G43675	AT1G43675	-2.74539	8.65e-65	4.11e-64
AT3G19500	BHLH113	5.07673	6.46e-140	5.23e-139			AT1G59910	FH7	-2.74444	0	0
AT2G23110	AT2G23110	5.0753	8.12e-113	5.62e-112			AT2G15370	FUT5	-2.74392	4.79e-17	1.19e-16
AT1G75290	AT1G75290	5.07328	2.76e-165	2.53e-164			AT1G69050	AT1G69050	-2.7419	1.64e-28	5.08e-28
AT2G28610	WOX3	5.06291	4.41e-47	1.74e-46			AT2G29310	AT2G29310	-2.74142	0	0
AT5G30500	GOLS10	5.0574	2.66e-14	6.15e-14			AT1G09340	CSP41B	-2.74127	0	0
AT3G28610	AT3G28610	5.04919	8e-25	2.32e-24			AT5G07322	AT5G07322	-2.74015	8.99e-117	6.39e-116
AT4G16240	AT4G16240	5.04913	6.22e-16	1.5e-15			AT1G72940	AT1G72940	-2.73892	0	0
AT4G16620	AT4G16620	5.03949	1.24e-253	1.64e-252			AT4G28930	AT4G28930	-2.73854	5e-08	9.6e-08
AT4G16460	AT4G16460	5.03925	7.95e-28	2.43e-27			AT1G08920	SUGTL2	-2.73539	0	0
AT1G04380	AT1G04380	5.03609	1.04e-26	3.12e-26			AT2G15960	AT2G15960	-2.73202	1.25e-187	1.28e-186
AT5G27220	AT5G27220	5.03455	1.25e-139	1.01e-138			AT1G08980	AMI1	-2.73046	0	0
AT3G30725	GDU6	5.03082	1.81e-50	7.44e-50			AT1G63057	AT1G63057	-2.72838	2.23e-05	3.85e-05
AT1G24000	AT1G24000	5.0269	3.2e-17	7.98e-17			AT4G13494	MIR863A	-2.72835	2.67e-21	7.27e-21
AT3G10780	AT3G10780	5.02668	2.51e-109	1.69e-108			AT5G36700	PGLP1B	-2.72607	1.35e-85	7.7e-85
AT5G39860	PRE1	5.02228	3.74e-96	2.3e-95			AT4G31800	WRKY18	-2.72259	0	0
AT2G41230	ORS1	5.00274	1.14e-132	8.9e-132			AT1G56630	AT1G56630	-2.72224	2.84e-33	9.4e-33
AT3G28150	AXY4L	5.00196	5.23e-287	7.92e-286			AT3G46400	AT3G46400	-2.72068	3.58e-06	6.39e-06
AT1G53070	AT1G53070	4.9993	0	0			AT1G33610	AT1G33610	-2.72026	2.43e-221	2.86e-220
AT1G22090	EMB2204	4.99635	1.76e-15	4.19e-15			AT3G05975	AT3G05975	-2.71984	4.91e-05	8.31e-05
AT2G27880	AGO5	4.99466	1.4e-67	6.82e-67			AT4G35655	AT4G35655	-2.71966	1.9e-06	3.42e-06
AT4G22235	AT4G22235	4.9938	0	0			AT5G18350	AT5G18350	-2.71652	5.24e-06	9.27e-06
AT5G14860	AT5G14860	4.99008	6.55e-53	2.77e-52			AT5G65300	AT5G65300	-2.71594	2.67e-172	2.55e-171
AT1G55740	RFS1	4.97522	0	0			AT5G13650	AT5G13650	-2.71562	0	0
AT1G04600	XI-A	4.97269	5.09e-167	4.7e-166			AT2G38152	AT2G38152	-2.71466	4.61e-07	8.54e-07
AT5G56368	AT5G56368	4.95904	5.37e-16	1.3e-15			AT4G13495	AT4G13495	-2.71392	0	0
AT2G45135	AT2G45135	4.94989	5.38e-158	4.75e-157			AT1G72900	AT1G72900	-2.70983	0	0
AT5G41280	CRRSP57	4.94369	4.64e-71	2.33e-70			AT2G35270	AHL21	-2.70927	2.57e-42	9.61e-42
AT5G51610	AT5G51610	4.94367	4.38e-14	1.01e-13			AT1G14490	AHL28	-2.70922	2.34e-11	5.02e-11
AT3G61680	AT3G61680	4.9375	0	0			AT3G48420	AT3G48420	-2.70613	0	0
AT4G25420	GA20OX1	4.92759	1.53e-73	7.85e-73			AT1G16120	WAKL1	-2.70475	1.03e-05	1.8e-05
AT3G51410	AT3G51410	4.92455	2.22e-70	1.11e-69			AT5G39210	CRR7	-2.70284	4.85e-203	5.35e-202
AT1G03710	AT1G03710	4.92324	2.2e-26	6.55e-26			AT5G38230	AT5G38230	-2.70216	4.33e-05	7.35e-05
AT5G66970	AT5G66970	4.923	5.97e-18	1.52e-17			AT4G32990	AT4G32990	-2.69994	1.9e-09	3.84e-09
AT1G50110	BCAT6	4.92015	0	0			AT5G45840	AT5G45840	-2.69985	2.71e-143	2.23e-142
AT5G17340	AT5G17340	4.92003	9.6e-65	4.55e-64			AT5G62470	MYB96	-2.6989	0	0
AT5G54550	AT5G54550	4.91596	1.92e-17	4.82e-17			AT2G46510	AIB	-2.69854	0	0
AT2G30770	CYP71A13	4.90255	1.6e-97	9.93e-97			AT1G07550	AT1G07550	-2.6979	1.22e-17	3.08e-17
AT3G50610	AT3G50610	4.90166	2.33e-17	5.83e-17			AT5G22660	AT5G22660	-2.69779	6.05e-13	1.35e-12
AT4G12500	AT4G12500	4.9014	5.97e-166	5.49e-165			AT3G59480	AT3G59480	-2.69745	4.73e-66	2.27e-65
AT4G13210	AT4G13210	4.90102	1.13e-229	1.37e-228			AT4G00970	CRK41	-2.69614	0	0
AT3G12410	AT3G12410	4.89578	5.38e-31	1.73e-30			AT3G25780	AOC3	-2.69457	0	0
AT1G55230	AT1G55230	4.89191	7.31e-18	1.85e-17			AT4G34060	DML3	-2.69308	2.07e-81	1.14e-80
AT1G68470	AT1G68470	4.89191	0	0			AT3G18710	PUB29	-2.6929	8.59e-254	1.14e-252
AT1G12890	ERF088	4.89124	5.98e-110	4.06e-109			AT4G17615	CBL1	-2.69168	0	0
AT2G14247	AT2G14247	4.88827	9.33e-225	1.11e-223			AT4G26520	AT4G26520	-2.69132	1.09e-304	1.74e-303
AT3G48770	AT3G48770	4.8687	8.92e-103	5.78e-102			AT5G52750	AT5G52750	-2.69078	1.52e-304	2.44e-303
AT3G50330	HEC2	4.8679	1.65e-16	4.05e-16			AT5G13660	AT5G13660	-2.68966	1.28e-126	9.64e-126
AT5G57760	AT5G57760	4.86153	1.64e-64	7.78e-64			AT1G20390	AT1G20390	-2.68928	0	0
AT5G19880	PER58	4.85885	1.17e-21	3.21e-21			AT1G12240	BFRUCT4	-2.68709	0	0
AT1G07985	AT1G07985	4.85736	0	0			AT5G06090	GPAT7	-2.68657	9.1e-33	3e-32
AT5G07310	ERF115	4.85275	1.74e-52	7.33e-52			AT2G28671	AT2G28671	-2.68601	3.6e-16	8.75e-16
AT2G21930	AT2G21930	4.84967	4.01e-14	9.25e-14			AT1G33720	CYP76C6	-2.68427	1.89e-50	7.8e-50
AT4G02700	SULTR3	4.8484	0	0			AT5G35110	AT5G35110	-2.6839	6.68e-56	2.9e-55
AT2G41070	DPBF4	4.84614	0	0			AT2G17590	AT2G17590	-2.68334	2.59e-06	4.65e-06
AT3G01516	AT3G01516	4.84213	1.3e-147	1.09e-146			AT5G43520	AT5G43520	-2.68068	1.28e-31	4.16e-31
AT3G25180	CYP82G1	4.83783	6.72e-13	1.5e-12			AT1G19510	RL5	-2.68067	2.03e-29	6.37e-29
AT5G53660	GRF7	4.83656	2.35e-55	1.02e-54			AT1G13540	AT1G13540	-2.6795	6.15e-15	1.45e-14
AT5G65230	AtMYB53	4.83584	4.62e-43	1.74e-42			AT1G80820	CCR2	-2.67901	2.17e-137	1.74e-136
AT1G19115	AT1G19115	4.83105	2.77e-65	1.32e-64			AT5G58260	ndhN	-2.67867	0	0
AT4G12490	AT4G12490	4.82556	8.57e-163	7.73e-162			AT1G09940	HEMA2	-2.67857	0	0
AT3G60100	CSY5	4.82244	9.42e-17	2.32e-16			AT5G47240	NUDT8	-2.67836	3.38e-171	3.21e-170
AT1G04920	SPS3	4.82031	0	0			AT1G69900	AT1G69900	-2.6773	8.69e-222	1.02e-220
AT4G08868	AT4G08868	4.8165	2.13e-35	7.27e-35			AT5G13205	AT5G13205	-2.67682	2.3e-52	9.67e-52
AT3G55566	AT3G55566	4.81575	1.62e-13	3.67e-13			AT5G40860	AT5G40860	-2.67469	2.04e-14	4.75e-14
AT5G20810	AT5G20810	4.8136	3.16e-82	1.76e-81			AT5G14150	AT5G14150	-2.67444	2.35e-27	7.12e-27
AT2G03505	AT2G03505	4.80662	0	0			AT1G57980	PUP22	-2.67268	3.64e-57	1.61e-56
AT3G28500	RPP2C	4.80373	1.34e-63	6.3e-63			AT3G45430	LECRK15	-2.6726	4.31e-17	1.07e-16
AT3G15720	AT3G15720	4.80201	0	0			AT1G73510	AT1G73510	-2.66936	1.49e-07	2.8e-07
AT2G42660	AT2G42660	4.79946	2.03e-285	3.05e-284			AT3G19040	TAF1B	-2.66922	3.17e-63	1.48e-62
AT4G24260	KOR3	4.79765	1.7e-86	9.77e-86			AT1G26540	AT1G26540	-2.66894	3.21e-17	8.01e-17
AT5G64530	ANAC104	4.79445	6.66e-124	4.94e-123			AT2G31345	AT2G31345	-2.66839	5.77e-05	9.74e-05
AT4G21680	NPF7.2	4.79438	0	0			AT2G39650	AT2G39650	-2.66838	1.76e-224	2.1e-223
AT4G23600	CORI3	4.79165	0	0			AT4G22980	AT4G22980	-2.66807	1.77e-111	1.22e-110
AT3G50230	AT3G50230	4.78976	3.65e-169	3.41e-168			AT4G01820	ABCB3	-2.66786	6.16e-11	1.3e-10
AT2G19320	AT2G19320	4.78821	6.74e-13	1.5e-12			AT3G50950	RPP13L4	-2.66778	0	0
AT2G32460	MYB101	4.78212	5.48e-33	1.81e-32			AT4G15680	GRXS4	-2.6654	1.33e-92	8e-92
AT5G06500	AGL96	4.77473	2.34e-16	5.71e-16			AT2G17080	AT2G17080	-2.66505	1.01e-27	3.1e-27
AT3G13640	ABCE1	4.77385	9.33e-73	4.77e-72			AT2G38300	AT2G38300	-2.66414	4.97e-227	5.99e-226
AT3G10200	AT3G10200	4.7734	0	0			AT5G06200	CASP4	-2.66377	1.82e-22	5.06e-22
AT5G41030	TCP6	4.77147	1.03e-15	2.48e-15			AT3G14440	NCED3	-2.66121	2.01e-74	1.04e-73
AT4G25980	PER43	4.76995	2.35e-208	2.64e-207			AT2G42850	CYP718	-2.661	8.48e-39	3.03e-38
AT3G28153	AT3G28153	4.76143	6.9e-189	7.14e-188			AT5G63160	BT1	-2.65755	0	0
AT4G32212	AT4G32212	4.75601	1.01e-202	1.11e-201			AT4G36550	PUB5	-2.65448	0	0
AT1G62360	STM	4.74599	0	0			AT3G46710	RPP13L2	-2.65279	3.93e-13	8.83e-13
AT1G09155	PP2B15	4.74506	2.59e-217	3e-216			AT1G26700	MLO14	-2.64981	4.47e-08	8.6e-08
AT2G43510	ATTI1	4.73699	0	0			AT1G64930	CYP89A7	-2.64808	3.36e-15	7.96e-15
AT2G25370	AT2G25370	4.73545	2.67e-14	6.17e-14			AT3G24360	AT3G24360	-2.64764	1.07e-15	2.56e-15
AT5G05220	AT5G05220	4.7347	1.03e-32	3.39e-32			AT3G52310	ABCG27	-2.64625	6.63e-51	2.75e-50
AT5G38790	AT5G38790	4.729	9.27e-55	3.99e-54			AT1G32470	GDH3	-2.64456	0	0
AT3G20470	GRP-5	4.72765	3.93e-278	5.74e-277			AT4G22460	AT4G22460	-2.64383	2.22e-16	5.41e-16
AT2G22710	AT2G22710	4.72191	4.29e-28	1.32e-27			AT1G55990	AT1G55990	-2.6436	5.1e-76	2.69e-75
AT1G57800	ORTH3	4.71306	1.43e-13	3.25e-13			AT5G52670	AT5G52670	-2.64209	2.23e-05	3.84e-05
AT4G14690	ELIP2	4.71219	1.53e-175	1.49e-174			AT5G27290	AT5G27290	-2.64204	0	0
AT5G55620	AT5G55620	4.70905	0	0			AT1G66910	AT1G66910	-2.64198	3.87e-224	4.61e-223
AT3G57240	BG3	4.70446	7.49e-111	5.1e-110			AT2G47370	AT2G47370	-2.64114	2.33e-27	7.07e-27
AT1G06350	AT1G06350	4.69636	2.99e-289	4.55e-288			AT4G34390	XLG2	-2.64083	0	0
AT3G22840	ELIP1	4.69498	2.13e-264	2.95e-263			AT5G38940	AT5G38940	-2.63948	2.62e-176	2.56e-175
AT3G43110	AT3G43110	4.69156	1.39e-231	1.7e-230			AT5G23480	AT5G23480	-2.63914	2.32e-06	4.17e-06
AT3G17540	AT3G17540	4.68081	9.48e-13	2.1e-12			AT2G37180	PIP2-3	-2.63847	7.45e-267	1.04e-265
AT3G18715	IDL4	4.67812	1.33e-33	4.44e-33			AT5G63770	DGK2	-2.63797	0	0
AT4G25850	ORP4B	4.67641	3.24e-153	2.8e-152			AT2G22500	PUMP5	-2.63687	0	0
AT3G05720	IMPA7	4.66264	1.07e-80	5.89e-80			AT5G44610	PCAP2	-2.63621	1.9e-193	2.01e-192
AT4G25930	AT4G25930	4.66218	4.48e-13	1e-12			AT3G21180	ACA9	-2.63564	3.29e-42	1.23e-41
AT5G36100	AT5G36100	4.66104	6.74e-39	2.42e-38			AT1G63040	AT1G63040	-2.63558	6.64e-22	1.83e-21
AT3G55100	ABCG17	4.66082	9.48e-13	2.1e-12			AT1G15980	PNSB1	-2.63534	0	0
AT5G55650	AT5G55650	4.66041	6.6e-38	2.34e-37			AT4G23515	AT4G23515	-2.63448	8.07e-33	2.66e-32
AT4G27250	AT4G27250	4.65887	1.39e-111	9.52e-111			AT1G02900	RALF1	-2.63338	3.59e-238	4.51e-237
AT4G14723	EPFL4	4.65527	9.17e-108	6.12e-107			AT5G25160	ZFP3	-2.63254	5.44e-78	2.92e-77
AT2G42430	LBD16	4.6497	6.12e-175	5.93e-174			AT4G29930	BHLH27	-2.62935	1.84e-73	9.47e-73
AT2G39820	EIF6-1	4.64796	6.38e-37	2.23e-36			AT5G13200	AT5G13200	-2.62886	3.74e-211	4.25e-210
AT5G35600	HDA7	4.6469	1.2e-14	2.8e-14			AT3G15210	ERF4	-2.62765	0	0
AT5G55490	GEX1	4.64519	2.3e-265	3.2e-264			AT1G20020	LFNR2	-2.62579	0	0
AT4G25000	AMY1	4.63983	1.92e-76	1.01e-75			AT5G23120	HCF136	-2.62277	0	0
AT5G42830	AT5G42830	4.63891	1.16e-261	1.59e-260			AT3G18690	MKS1	-2.6211	1.84e-204	2.04e-203
AT3G25240	AT3G25240	4.63741	4.31e-150	3.67e-149			AT5G10950	AT5G10950	-2.61963	1.67e-153	1.44e-152
AT5G13790	AGL15	4.63558	0	0			AT2G29180	AT2G29180	-2.61891	3.96e-182	3.97e-181
AT5G11930	GRXC10	4.63205	2.53e-58	1.13e-57			AT3G59250	AT3G59250	-2.61578	1.43e-24	4.14e-24
AT4G31630	REM4	4.63163	8.64e-14	1.97e-13			AT3G23700	AT3G23700	-2.60979	0	0
AT1G68460	IPT1	4.6316	5.26e-49	2.13e-48			AT1G80380	GLYK	-2.60906	0	0
AT1G64585	RTFL22	4.62958	1.87e-12	4.12e-12			AT5G13900	VAS	-2.60869	2.29e-23	6.49e-23
AT3G43190	SUS4	4.62946	0	0			AT2G34940	VSR5	-2.60823	3.14e-23	8.89e-23
AT5G66985	AT5G66985	4.62685	0	0			AT2G18196	AT2G18196	-2.60652	1.95e-90	1.15e-89
AT2G37670	AT2G37670	4.62667	0	0			AT1G67860	AT1G67860	-2.60611	2.92e-239	3.68e-238
AT2G21770	CESA9	4.61828	0	0			AT4G24230	ACBP3	-2.60135	0	0
AT3G27040	AT3G27040	4.61574	3e-15	7.11e-15			AT2G02630	AT2G02630	-2.60059	2.48e-26	7.38e-26
AT1G30515	AT1G30515	4.61293	3.37e-77	1.79e-76			AT4G17250	AT4G17250	-2.59815	2.31e-286	3.49e-285
AT5G27190	AT5G27190	4.61183	6.93e-12	1.5e-11			AT1G71500	AT1G71500	-2.59691	0	0
AT4G03450	AT4G03450	4.60995	2.29e-19	6e-19			AT4G33010	GLDP1	-2.59661	0	0
AT1G66370	MYB113	4.60456	4.24e-13	9.51e-13			AT1G69150	AT1G69150	-2.59616	7.8e-07	1.43e-06
AT1G18830	SEC31A	4.60435	3.64e-84	2.05e-83			AT1G27480	LCAT1	-2.5961	2.55e-264	3.53e-263
AT5G22580	AT5G22580	4.6005	0	0			AT1G54215	AT1G54215	-2.59514	5.05e-05	8.55e-05
AT3G21560	UGT84A2	4.59475	0	0			AT1G44318	HEMB2	-2.59486	4.98e-05	8.42e-05
AT1G48000	MYB112	4.59355	1.05e-149	8.89e-149			AT3G52510	AT3G52510	-2.59374	8.1e-05	0.000135741
AT1G52040	MBP1	4.59257	0	0			AT3G14225	GLIP4	-2.59292	9.51e-06	1.67e-05
AT4G23720	AT4G23720	4.59114	6.87e-65	3.26e-64			AT5G35777	AT5G35777	-2.59133	1.68e-46	6.59e-46
AT5G53390	AT5G53390	4.58949	1.59e-15	3.81e-15			AT2G29130	LAC2	-2.58907	6.51e-28	1.99e-27
AT2G34020	AT2G34020	4.58275	0	0			AT3G57160	AT3G57160	-2.58845	8.8e-33	2.9e-32
AT3G05150	AT3G05150	4.58133	0	0			AT5G08240	AT5G08240	-2.58768	0	0
AT5G66830	AT5G66830	4.57841	7.39e-160	6.58e-159			AT1G03400	AT1G03400	-2.58675	3.43e-137	2.74e-136
AT5G28810	AT5G28810	4.56916	6e-13	1.34e-12			AT1G33090	AT1G33090	-2.58674	1.11e-07	2.1e-07
AT2G26440	PME12	4.56853	0	0			AT3G53980	AT3G53980	-2.58653	0	0
AT2G33880	WOX9	4.56832	1.82e-31	5.87e-31			AT3G06750	AT3G06750	-2.58499	1.33e-256	1.78e-255
AT5G43860	CLH2	4.5647	1.03e-306	1.66e-305			AT5G60520	AT5G60520	-2.58024	8.4e-39	3.01e-38
AT3G21040	AT3G21040	4.56038	1.71e-69	8.5e-69			AT5G48430	AT5G48430	-2.57739	2.15e-21	5.84e-21
AT4G22233	AT4G22233	4.56023	1.4e-74	7.27e-74			AT5G44020	AT5G44020	-2.57547	0	0
AT1G49110	AT1G49110	4.55854	9.39e-35	3.18e-34			AT4G32860	AT4G32860	-2.5744	1.34e-32	4.39e-32
AT1G14930	AT1G14930	4.55733	3.11e-35	1.06e-34			AT3G12685	AT3G12685	-2.57362	3.54e-91	2.1e-90
AT1G70840	MLP31	4.55476	6.11e-14	1.4e-13			AT5G44582	AT5G44582	-2.57261	1.79e-22	4.98e-22
AT1G03120	ATRAB28	4.55404	6.24e-96	3.83e-95			AT3G62160	AT3G62160	-2.57072	1.47e-27	4.46e-27
AT4G32810	CCD8	4.54593	5.55e-250	7.25e-249			AT1G18730	PNSB4	-2.5703	3.74e-190	3.9e-189
AT3G12460	AT3G12460	4.53272	1.01e-118	7.28e-118			AT2G39518	AT2G39518	-2.57027	1.83e-59	8.24e-59
AT3G08040	FRD3	4.53114	0	0			AT2G20960	pEARLI4	-2.57008	0	0
AT5G02760	AT5G02760	4.52714	0	0			AT2G22860	PSK2	-2.56867	2.93e-209	3.31e-208
AT5G52330	AT5G52330	4.52616	5.3e-189	5.49e-188			AT1G27140	GSTU14	-2.56399	4.1e-24	1.18e-23
AT3G05630	PLDP2	4.52446	0	0			AT1G66760	AT1G66760	-2.56382	0	0
AT1G04150	AT1G04150	4.52355	8.59e-90	5.04e-89			AT3G19480	PGDH3	-2.56382	0	0
AT5G10140	FLC	4.52003	0	0			AT1G08550	VDE1	-2.56319	0	0
AT3G24340	CLSY4	4.5132	1.99e-142	1.64e-141			AT4G37950	AT4G37950	-2.5628	4.37e-05	7.41e-05
AT5G07600	AT5G07600	4.51092	2.25e-22	6.25e-22			AT2G14100	CYP705A13	-2.56252	3.78e-54	1.62e-53
AT5G37940	AT5G37940	4.50901	4.71e-17	1.17e-16			AT3G26650	GAPA1	-2.56248	0	0
AT5G38900	AT5G38900	4.5086	2.11e-227	2.55e-226			AT1G17255	AT1G17255	-2.56244	4.04e-31	1.3e-30
AT3G16150	AT3G16150	4.50529	0	0			AT2G34930	AT2G34930	-2.56201	0	0
AT2G04135	AT2G04135	4.50011	8.69e-28	2.66e-27			AT4G00165	AT4G00165	-2.56182	4.29e-135	3.39e-134
AT3G21890	AT3G21890	4.49829	1.2e-15	2.86e-15			AT3G24540	PERK3	-2.55861	9.77e-06	1.71e-05
AT4G11350	AT4G11350	4.49727	1.64e-299	2.58e-298			AT4G21390	B120	-2.55768	8.04e-124	5.96e-123
AT5G64550	AT5G64550	4.49563	0	0			AT3G46080	ZAT8	-2.55672	2.34e-58	1.04e-57
AT5G51500	PME60	4.49447	0	0			AT5G26030	HEM15	-2.5559	0	0
AT1G07175	AT1G07175	4.49154	1e-47	3.99e-47			AT5G59080	AT5G59080	-2.55564	3.18e-174	3.07e-173
AT1G25530	AT1G25530	4.4899	0	0			AT2G47270	UPB1	-2.55551	2.53e-63	1.19e-62
AT3G03240	AT3G03240	4.4879	2.55e-36	8.85e-36			AT4G18197	PUP7	-2.55372	0	0
AT5G33390	AT5G33390	4.48261	4.04e-12	8.83e-12			AT1G75460	AT1G75460	-2.55353	0	0
AT4G29570	CDA8	4.4825	1.47e-13	3.33e-13			AT1G61750	CRRSP1	-2.55247	2.08e-18	5.33e-18
AT3G57260	BG2	4.47905	4.68e-72	2.37e-71			AT4G13505	AT4G13505	-2.55179	6.17e-20	1.64e-19
AT5G63070	RPS15F	4.47477	1.63e-16	3.98e-16			AT1G23310	GGAT1	-2.55152	0	0
AT2G35570	AT2G35570	4.47134	4.55e-27	1.37e-26			AT4G36410	UBC17	-2.5499	2.61e-297	4.08e-296
AT3G28510	AT3G28510	4.46889	6.63e-40	2.41e-39			AT1G66180	AT1G66180	-2.54848	0	0
AT5G14810	AT5G14810	4.46814	8.43e-201	9.21e-200			AT4G23570	SGT1A	-2.54751	0	0
AT3G11740	AT3G11740	4.46687	9.05e-24	2.58e-23			AT5G01040	LAC8	-2.54672	0	0
AT1G47405	AT1G47405	4.46537	1.7e-14	3.96e-14			AT1G58070	AT1G58070	-2.54652	3.57e-70	1.78e-69
AT2G45360	AT2G45360	4.4646	2.72e-114	1.9e-113			AT4G38080	AT4G38080	-2.54611	0	0
AT5G09910	AT5G09910	4.46242	1.55e-21	4.22e-21			AT5G59550	AT5G59550	-2.54443	0	0
AT4G14165	AT4G14165	4.46127	2.3e-22	6.39e-22			AT3G23430	PHO1	-2.54319	0	0
AT3G20180	AT3G20180	4.46059	3.93e-15	9.3e-15			AT4G20920	AT4G20920	-2.54275	5.51e-06	9.74e-06
AT5G48710	SUMO4	4.45544	1.15e-15	2.75e-15			AT2G27080	AT2G27080	-2.5421	0	0
AT3G22550	AT3G22550	4.45456	0	0			AT1G74880	ndhO	-2.54095	0	0
AT1G77960	AT1G77960	4.45332	9.62e-48	3.83e-47			AT2G32510	MAPKKK17	-2.54037	5.36e-28	1.65e-27
AT5G17220	GSTF12	4.44435	2.33e-66	1.12e-65			AT1G63720	AT1G63720	-2.54028	9.57e-258	1.29e-256
AT3G04300	AT3G04300	4.44114	9.85e-214	1.13e-212			AT5G02170	AT5G02170	-2.53953	2.35e-47	9.33e-47
AT5G58610	AT5G58610	4.43806	6.98e-85	3.96e-84			AT4G30120	HMA3	-2.53849	1.57e-12	3.46e-12
AT2G45290	TKL-2	4.43575	0	0			AT3G29375	AT3G29375	-2.53542	3.06e-72	1.56e-71
AT3G27250	AT3G27250	4.42668	3.08e-38	1.1e-37			AT4G14103	AT4G14103	-2.5351	9.01e-29	2.8e-28
AT2G42800	AtRLP29	4.4211	2.85e-155	2.49e-154			AT1G54310	AT1G54310	-2.53501	3.38e-188	3.48e-187
AT5G64552	CPuORF22	4.41575	0	0			AT1G09930	OPT2	-2.5324	7.14e-20	1.89e-19
AT3G62100	IAA30	4.41247	5.23e-76	2.76e-75			AT3G01760	AT3G01760	-2.52826	2.65e-05	4.54e-05
AT5G59305	CLE46	4.41185	1.2e-11	2.59e-11			AT5G22920	AT5G22920	-2.52821	0	0
AT5G55135	AT5G55135	4.40958	4.34e-11	9.22e-11			AT2G32300	UCC1	-2.52807	1.55e-52	6.52e-52
AT3G46230	HSP17.4A	4.40935	5.88e-80	3.2e-79			AT5G66520	PCMP-H61	-2.5251	4.88e-241	6.19e-240
AT5G18320	PUB46	4.40689	2.18e-35	7.45e-35			AT3G15770	AT3G15770	-2.52192	5.11e-302	8.12e-301
AT5G65550	UGT91B1	4.40657	5e-98	3.12e-97			AT3G14770	SWEET2	-2.52036	4.67e-92	2.79e-91
AT4G17660	AT4G17660	4.40273	8.47e-12	1.84e-11			AT1G80120	AT1G80120	-2.52007	1.25e-52	5.27e-52
AT4G12580	AT4G12580	4.40158	6.34e-110	4.3e-109			AT5G10250	DOT3	-2.51945	0.000129962	0.000215071
AT1G56170	NFYC2	4.3955	0	0			AT1G58370	RXF12	-2.51926	1.65e-143	1.36e-142
AT1G28300	LEC2	4.39246	1.11e-19	2.92e-19			AT3G60700	AT3G60700	-2.51865	5.7e-07	1.05e-06
AT5G62210	AT5G62210	4.39118	0	0			AT1G55450	AT1G55450	-2.51668	0	0
AT2G39370	MAKR4	4.38763	2.78e-76	1.47e-75			AT4G36500	AT4G36500	-2.51169	0	0
AT2G18590	AT2G18590	4.37971	2.05e-26	6.09e-26			AT1G25250	IDD16	-2.51139	6.04e-18	1.53e-17
AT1G20180	AT1G20180	4.37769	1.28e-19	3.37e-19			AT3G47960	NPF2.10	-2.5094	0	0
AT1G75160	AT1G75160	4.37358	2.91e-51	1.21e-50			AT1G69720	HO3	-2.50843	4.06e-15	9.6e-15
AT1G52470	AT1G52470	4.37254	9.37e-12	2.03e-11			AT1G67710	ARR11	-2.50495	3.65e-65	1.74e-64
AT2G18010	AT2G18010	4.3685	1.32e-16	3.23e-16			AT5G35630	GLN2	-2.50493	0	0
AT5G51950	AT5G51950	4.35869	4.21e-11	8.93e-11			AT1G51090	AT1G51090	-2.50395	3.27e-65	1.56e-64
AT2G15400	NRPD3B	4.35615	4.36e-157	3.83e-156			AT1G22740	RABG3B	-2.50299	4.06e-201	4.45e-200
AT2G25770	AT2G25770	4.35538	0	0			AT5G37550	AT5G37550	-2.50185	2.26e-12	4.96e-12
AT2G15318	AT2G15318	4.34242	1.87e-20	5.01e-20			AT3G26520	TIP1-2	-2.50185	0	0
AT3G13010	AT3G13010	4.34164	1.2e-13	2.73e-13			AT1G11210	AT1G11210	-2.50107	0	0
AT5G24640	AT5G24640	4.3341	2.17e-53	9.22e-53			AT1G16880	ACR11	-2.49973	0	0
AT3G57950	AT3G57950	4.33244	6.5e-98	4.05e-97			AT5G17880	CSA1	-2.49967	0	0
AT5G02210	AT5G02210	4.33234	2.87e-13	6.46e-13			AT3G46490	AT3G46490	-2.49923	1.81e-26	5.4e-26
AT3G05152	AT3G05152	4.33091	5.54e-20	1.47e-19			AT5G23240	AT5G23240	-2.49812	0	0
AT4G29850	AT4G29850	4.32831	3.56e-139	2.87e-138			AT3G53720	CHX20	-2.49775	0	0
AT1G12980	ESR1	4.32505	1.18e-35	4.04e-35			AT1G49310	AT1G49310	-2.49587	4.93e-96	3.03e-95
AT4G09940	AT4G09940	4.32328	1.38e-10	2.9e-10			AT5G36790	PGLP1B	-2.49287	8.51e-150	7.23e-149
AT4G15248	AT4G15248	4.32041	2.55e-16	6.21e-16			AT2G04032	ZIP7	-2.49284	6.36e-05	0.000106984
AT4G12890	AT4G12890	4.31119	1.45e-36	5.03e-36			AT3G55150	ATEXO70H1	-2.49279	2.79e-36	9.66e-36
AT1G10370	GSTU17	4.30907	0	0			AT3G61060	PP2A13	-2.49247	0	0
AT5G23180	AT5G23180	4.30388	7.26e-11	1.53e-10			AT4G36850	AT4G36850	-2.49042	0	0
AT1G66390	MYB90	4.30285	1.54e-15	3.69e-15			AT1G24147	AT1G24147	-2.48952	5.24e-36	1.81e-35
AT3G23950	AT3G23950	4.29873	3.85e-11	8.19e-11			AT3G03480	CHAT	-2.48886	3.25e-34	1.09e-33
AT5G62230	ERL1	4.29448	0	0			AT2G31945	AT2G31945	-2.48785	1.88e-90	1.11e-89
AT5G08030	GDPD6	4.29408	1.23e-35	4.23e-35			AT5G14120	AT5G14120	-2.48783	0	0
AT4G25250	AT4G25250	4.29303	5.26e-165	4.8e-164			AT1G25400	AT1G25400	-2.48771	0	0
AT4G05380	AT4G05380	4.28984	1.35e-35	4.62e-35			AT3G49530	NAC062	-2.48647	0	0
AT3G09110	AT3G09110	4.28369	2.4e-11	5.13e-11			AT5G46915	AT5G46915	-2.48492	2.75e-05	4.71e-05
AT5G55430	AT5G55430	4.27936	3.75e-11	7.98e-11			AT1G27110	AT1G27110	-2.48223	5.17e-19	1.34e-18
AT1G26590	AT1G26590	4.27766	1.26e-47	5.02e-47			AT2G12190	AT2G12190	-2.48212	9.62e-13	2.14e-12
AT5G20420	CLSY2	4.27732	0	0			AT2G46720	HIC	-2.48123	0	0
AT1G80133	EPFL8	4.27418	1.53e-10	3.2e-10			AT2G37430	ZAT11	-2.48093	1.9e-35	6.5e-35
AT5G35950	JAL42	4.27315	1.07e-10	2.25e-10			AT1G43160	RAP2-6	-2.4808	3.34e-31	1.08e-30
AT4G19810	AT4G19810	4.26858	0	0			AT1G22550	NPF5.16	-2.47992	5.76e-134	4.52e-133
AT4G09875	AT4G09875	4.264	2.53e-71	1.27e-70			AT2G28990	AT2G28990	-2.47963	1.99e-52	8.38e-52
AT4G12470	AZI1	4.26288	0	0			AT5G04980	AT5G04980	-2.47939	3.31e-84	1.87e-83
AT5G39220	AT5G39220	4.26197	9.95e-58	4.4e-57			AT2G04038	AtbZIP48	-2.47921	1.47e-05	2.55e-05
AT1G29870	AT1G29870	4.26083	1.57e-11	3.37e-11			AT1G58037	AT1G58037	-2.47864	1.1e-08	2.17e-08
AT4G22960	AT4G22960	4.26007	1.15e-55	4.99e-55			AT4G19720	AT4G19720	-2.47757	1.56e-14	3.63e-14
AT3G02000	GRXC7	4.25837	3.62e-111	2.47e-110			AT4G11290	PER39	-2.47682	1.26e-116	8.97e-116
AT4G17710	HDG4	4.2542	9.33e-24	2.66e-23			AT2G29290	AT2G29290	-2.47615	6.19e-305	9.94e-304
AT3G61118	AT3G61118	4.25351	7.08e-20	1.88e-19			AT5G38520	AT5G38520	-2.47565	0	0
AT2G16890	UGT90A1	4.24537	0	0			AT5G13730	SIGD	-2.47438	0	0
AT2G04770	AT2G04770	4.24409	1.51e-10	3.15e-10			AT3G44190	AT3G44190	-2.47414	0	0
AT1G09180	ATSAR1	4.24406	6.93e-65	3.29e-64			AT3G29020	MYB110	-2.47224	0.000182017	0.000298516
AT1G02700	AT1G02700	4.24085	6.33e-266	8.82e-265			AT1G48698	AT1G48698	-2.47069	1.69e-05	2.92e-05
AT3G50990	PER36	4.23866	4.61e-12	1.01e-11			AT3G10985	SAG20	-2.46766	0	0
AT2G14470	AT2G14470	4.23739	2.82e-11	6.01e-11			AT5G56980	AT5G56980	-2.46312	0	0
AT5G13170	SWEET15	4.22726	1.03e-235	1.28e-234			AT2G05441	AT2G05441	-2.4625	0.000153544	0.000253083
AT5G52600	MYB82	4.2255	7.36e-63	3.43e-62			AT2G21120	AT2G21120	-2.4619	0	0
AT2G31180	ATMYB14	4.22492	1.42e-68	6.96e-68			AT2G35290	AT2G35290	-2.46168	1.19e-259	1.62e-258
AT5G57240	ORP4C	4.22426	0	0			AT4G11410	AT4G11410	-2.46036	1.29e-134	1.01e-133
AT1G65550	NAT10	4.22316	1.73e-10	3.62e-10			AT4G37925	NDHM	-2.45988	0	0
AT5G06250	AT5G06250	4.22266	3.62e-45	1.4e-44			AT4G30280	XTH18	-2.45966	0	0
AT5G12030	HSP17.7	4.22255	8.9e-38	3.15e-37			AT5G23780	DUF9	-2.45954	2.99e-08	5.78e-08
AT3G50890	ZHD7	4.22114	4.12e-148	3.47e-147			AT3G51360	AT3G51360	-2.45878	1.2e-14	2.8e-14
AT4G11642	AT4G11642	4.22058	5.83e-13	1.3e-12			AT3G51478	AT3G51478	-2.45781	5.02e-21	1.36e-20
AT3G12320	T2E22.34	4.20967	1.53e-158	1.35e-157			AT1G66173	AT1G66173	-2.45762	1.84e-16	4.5e-16
AT5G07260	AT5G07260	4.20942	4.98e-12	1.09e-11			AT5G13190	AT5G13190	-2.45758	0	0
AT1G70440	SRO3	4.20768	2.72e-69	1.35e-68			AT1G79245	AT1G79245	-2.45751	0	0
AT5G63250	AT5G63250	4.19497	1.12e-10	2.35e-10			AT2G30670	AT2G30670	-2.45691	8.51e-14	1.94e-13
AT5G60760	AT5G60760	4.18701	0	0			AT3G63240	AT3G63240	-2.45687	2.24e-130	1.72e-129
AT5G63087	AT5G63087	4.18503	4.39e-12	9.58e-12			AT1G50130	AT1G50130	-2.45662	0.000241005	0.000392169
AT2G46880	PAP14	4.18472	3.23e-84	1.82e-83			AT3G04445	AT3G04445	-2.45531	1e-18	2.59e-18
AT2G01960	TET14	4.18445	7.66e-12	1.66e-11			AT1G52870	AT1G52870	-2.45524	0	0
AT1G20750	AT1G20750	4.18215	7.73e-14	1.77e-13			AT5G13830	AT5G13830	-2.45451	8.52e-21	2.3e-20
AT4G00210	LBD31	4.17951	2.8e-12	6.14e-12			AT1G61470	CAF1-5	-2.45409	1.17e-42	4.39e-42
AT3G10040	AT3G10040	4.17677	0	0			AT4G20830	AT4G20830	-2.45399	0	0
AT5G34480	AT5G34480	4.17491	4.01e-13	9e-13			AT5G11080	AT5G11080	-2.45387	0.000261653	0.00042483
AT3G60540	AT3G60540	4.16679	2e-77	1.07e-76			AT1G44180	AT1G44180	-2.45329	3.68e-23	1.04e-22
AT1G66420	AT1G66420	4.16627	2.13e-11	4.57e-11			AT3G19030	AT3G19030	-2.45252	7.59e-95	4.62e-94
AT3G12060	TBL1	4.16506	8.09e-90	4.74e-89			AT3G49070	AT3G49070	-2.45236	2.95e-27	8.93e-27
AT5G27345	AT5G27345	4.16304	3.87e-28	1.19e-27			AT4G01760	AT4G01760	-2.452	6.07e-05	0.000102227
AT1G59630	AT1G59630	4.16233	3.54e-10	7.32e-10			AT3G09830	AT3G09830	-2.45016	0	0
AT4G22090	AT4G22090	4.16207	5.73e-13	1.28e-12			AT2G07042	AT2G07042	-2.44995	1.59e-26	4.73e-26
AT5G42235	AT5G42235	4.16134	2.14e-14	4.96e-14			AT1G70820	AT1G70820	-2.44867	0	0
AT5G55360	AT3	4.16092	6.66e-28	2.04e-27			AT4G15690	GRXS5	-2.44743	3.12e-170	2.94e-169
AT2G43470	AT2G43470	4.15777	8.75e-45	3.37e-44			AT5G08050	AT5G08050	-2.44719	1.19e-290	1.82e-289
AT5G42290	AT5G42290	4.15681	1.63e-30	5.18e-30			AT4G17970	ALMT12	-2.44653	0	0
AT5G11100	SYT4	4.15617	0	0			AT2G02610	AT2G02610	-2.4464	1.84e-22	5.12e-22
AT5G35770	SAP	4.15415	3.21e-55	1.38e-54			AT3G62410	CP12-2	-2.44462	0	0
AT5G10760	AT5G10760	4.14578	3.38e-177	3.31e-176			AT2G35000	ATL9	-2.44451	1.29e-43	4.91e-43
AT5G42800	DFRA	4.13642	1.05e-72	5.37e-72			AT2G04170	AT2G04170	-2.44356	5.85e-136	4.64e-135
AT1G30920	AT1G30920	4.13519	3.33e-23	9.42e-23			AT1G02020	AT1G02020	-2.44347	1.44e-117	1.03e-116
AT3G59884	MIR827A	4.13421	1.57e-12	3.46e-12			AT3G47070	AT3G47070	-2.44158	0	0
AT3G42820	AT3G42820	4.13035	1.87e-10	3.9e-10			AT1G26230	CPN60B4	-2.44115	0	0
AT3G03910	GSH3	4.12957	3.31e-27	9.98e-27			AT1G58140	AT1G58140	-2.43913	4.65e-19	1.21e-18
AT5G07930	MCT2	4.12793	4.59e-10	9.46e-10			AT1G60950	FD2	-2.4387	0	0
AT1G72620	AT1G72620	4.11777	1.57e-87	9.07e-87			AT2G33750	PUP2	-2.43766	1.27e-08	2.5e-08
AT2G07080	AT2G07080	4.1153	7.79e-13	1.73e-12			AT3G44790	AT3G44790	-2.43553	0.000191064	0.000312864
AT5G58400	PER68	4.11004	2.66e-14	6.15e-14			AT4G20390	AT4G20390	-2.43511	1.98e-123	1.46e-122
AT5G59340	WOX2	4.10141	2.79e-186	2.84e-185			AT2G22510	AT2G22510	-2.43495	8.25e-35	2.8e-34
AT1G30530	UGT78D1	4.0972	0	0			AT1G65760	AT1G65760	-2.43362	0.000210992	0.000344689
AT5G39520	AT5G39520	4.09651	2.48e-91	1.47e-90			AT2G46495	ATL21A	-2.43085	4.92e-07	9.09e-07
AT1G19640	JMT	4.08936	2.71e-18	6.91e-18			AT1G16260	WAKL8	-2.43075	1.4e-128	1.06e-127
AT2G34740	AT2G34740	4.08928	7.74e-10	1.58e-09			AT3G45760	AT3G45760	-2.43047	0.000299882	0.000485167
AT1G07540	TRP5	4.0887	9.29e-12	2.01e-11			AT1G77500	AT1G77500	-2.42658	2.03e-233	2.51e-232
AT3G10100	AT3G10100	4.08853	2.42e-57	1.07e-56			AT1G03090	MCCA	-2.42613	0	0
AT4G01170	AT4G01170	4.07965	1.19e-09	2.42e-09			AT4G25380	SAP10	-2.42575	6.34e-06	1.12e-05
AT4G27810	AT4G27810	4.07453	1.12e-43	4.28e-43			AT3G26310	CYP71B35	-2.42554	2e-98	1.25e-97
AT3G21730	FOLB3	4.07342	7.6e-10	1.55e-09			AT1G59780	AT1G59780	-2.42525	5.85e-30	1.85e-29
AT5G46960	AT5G46960	4.07211	1.75e-14	4.07e-14			AT5G07870	AT5G07870	-2.42504	8.73e-205	9.69e-204
AT3G07540	FH10	4.07202	0	0			AT5G17165	AT5G17165	-2.42355	1.15e-08	2.25e-08
AT1G08440	ALMT2	4.07151	1.43e-09	2.9e-09			AT5G42230	SCPL41	-2.42347	1.56e-05	2.71e-05
AT1G02450	NIMIN-1	4.0693	2.35e-11	5.03e-11			AT5G66800	AT5G66800	-2.42245	1.01e-48	4.08e-48
AT4G32280	IAA29	4.06559	1.67e-69	8.28e-69			AT5G53250	AGP22	-2.42234	1.81e-73	9.3e-73
AT5G26220	AT5G26220	4.06072	1.22e-206	1.36e-205			AT2G37170	PIP2-2	-2.42224	0	0
AT1G65500	AT1G65500	4.05901	1.03e-253	1.36e-252			AT3G54880	AT3G54880	-2.42193	0	0
AT2G18190	AT2G18190	4.0532	1.01e-20	2.72e-20			AT2G35370	GDH1	-2.42169	0	0
AT2G30690	MYOB4	4.04921	1.13e-43	4.31e-43			AT1G49380	CCS1	-2.42151	0	0
AT3G20395	AT3G20395	4.04739	2.61e-108	1.74e-107			AT1G70090	GATL9	-2.42137	0	0
AT1G05490	CLSY3	4.04641	2.86e-135	2.26e-134			AT4G33050	EDA39	-2.42065	0	0
AT1G60110	JAL17	4.04257	4.83e-13	1.08e-12			AT1G03600	PSB27-1	-2.42052	4.31e-198	4.63e-197
AT5G53048	AT5G53048	4.04228	1.73e-292	2.68e-291			AT3G11390	AT3G11390	-2.42036	4.6e-08	8.86e-08
AT5G66990	RKD3	4.03981	1.02e-09	2.08e-09			AT3G01840	LYK2	-2.41874	2.16e-18	5.53e-18
AT4G33467	AT4G33467	4.03899	1.57e-105	1.03e-104			AT5G59330	AT5G59330	-2.41798	2.18e-17	5.45e-17
AT3G44450	AT3G44450	4.03895	1.35e-83	7.56e-83			AT5G39670	CML45	-2.41779	1.38e-71	6.96e-71
AT5G46230	AT5G46230	4.03408	0	0			AT1G06240	AT1G06240	-2.41733	3.98e-129	3.04e-128
AT3G08790	AT3G08790	4.03075	1.19e-10	2.5e-10			AT5G24590	ANAC091	-2.41717	0	0
AT1G47395	AT1G47395	4.02949	1.2e-30	3.83e-30			AT5G41300	CRRSP59	-2.4156	3.86e-06	6.88e-06
AT4G23680	AT4G23680	4.0284	0	0			AT4G29800	PLP8	-2.41512	8.76e-33	2.89e-32
AT4G19730	AT4G19730	4.02177	2.15e-10	4.48e-10			AT1G18200	RABA6B	-2.41504	1.52e-151	1.3e-150
AT3G04660	AT3G04660	4.02015	1.33e-29	4.18e-29			AT4G12320	CYP706A6	-2.41336	6.79e-302	1.08e-300
AT5G35375	AT5G35375	4.0118	6.24e-19	1.62e-18			AT3G06080	TBL10	-2.41335	0	0
AT3G09190	AT3G09190	4.01123	9.18e-230	1.12e-228			AT3G47510	AT3G47510	-2.40791	4.96e-102	3.19e-101
AT5G41610	CHX18	4.0073	0	0			AT4G06536	AT4G06536	-2.40689	1.61e-14	3.74e-14
AT5G53700	AT5G53700	4.00447	1.64e-83	9.2e-83			AT1G32970	AT1G32970	-2.40411	2.09e-07	3.91e-07
AT1G04778	AT1G04778	4.00371	9.04e-18	2.28e-17			AT2G45820	DBP	-2.40396	0	0
AT1G72660	DRG2	4.00068	1.4e-77	7.48e-77			AT1G63180	UGE3	-2.40309	0	0
AT1G19630	CYP722A1	4.00023	6.45e-17	1.6e-16			AT2G10931	AT2G10931	-2.40101	7.66e-35	2.6e-34
AT1G61255	AT1G61255	3.99863	1.77e-48	7.14e-48			AT5G59732	AT5G59732	-2.40065	0.000297587	0.000481539
AT1G56600	GOLS2	3.99481	9.95e-128	7.53e-127			AT3G23240	ERF1B	-2.40051	7.07e-17	1.75e-16
AT2G43620	AT2G43620	3.98985	1.51e-115	1.06e-114			AT5G07040	ATL69	-2.4001	1.61e-10	3.36e-10
AT2G26130	AT2G26130	3.98488	2.28e-10	4.73e-10			AT4G06534	AT4G06534	-2.3982	2.74e-26	8.15e-26
AT5G09970	CYP78A7	3.98436	2.48e-144	2.06e-143			AT4G08110	AT4G08110	-2.39627	5.79e-142	4.75e-141
AT2G14160	AT2G14160	3.98397	1.47e-52	6.21e-52			AT1G65850	AT1G65850	-2.39613	1.7e-22	4.72e-22
AT2G17845	AT2G17845	3.98037	2.06e-10	4.29e-10			AT4G26260	MIOX4	-2.39612	6.13e-174	5.92e-173
AT1G15840	AT1G15840	3.97864	4.27e-60	1.94e-59			AT1G49030	PCR6	-2.39518	2.17e-08	4.23e-08
AT3G15990	SULTR3	3.97829	0	0			AT5G39020	AT5G39020	-2.3949	1.1e-78	5.95e-78
AT2G05300	AT2G05300	3.97624	1.26e-267	1.77e-266			AT4G37940	AGL21	-2.39439	5.56e-33	1.84e-32
AT4G02360	AT4G02360	3.97478	4.86e-219	5.68e-218			AT1G07000	ATEXO70B2	-2.39131	0	0
AT1G54840	IDM2	3.97422	2.19e-109	1.48e-108			AT3G32030	TPS30	-2.3912	1.56e-24	4.49e-24
AT4G25530	HDG6	3.97374	1.11e-16	2.72e-16			AT3G48360	BT2	-2.39074	0	0
AT2G36500	CBSCBSPB2	3.97144	1.57e-91	9.33e-91			AT1G20150	AT1G20150	-2.39009	0.000313046	0.000505893
AT1G35513	AT1G35513	3.9714	1.41e-91	8.37e-91			AT5G57400	AT5G57400	-2.39005	5.16e-10	1.06e-09
AT2G31920	AT2G31920	3.9705	6.86e-66	3.29e-65			AT3G24020	DIR16	-2.38962	1.19e-105	7.88e-105
AT3G27480	AT3G27480	3.9667	1.04e-70	5.22e-70			AT2G27389	AT2G27389	-2.38935	1.39e-33	4.63e-33
AT3G48510	AT3G48510	3.96561	2.63e-37	9.21e-37			AT4G14480	BLUS1	-2.38886	6.67e-171	6.32e-170
AT3G31023	AT3G31023	3.96379	1.58e-16	3.87e-16			AT1G77330	AT1G77330	-2.38853	0	0
AT1G07485	AT1G07485	3.9614	5.04e-12	1.1e-11			AT1G67700	HHL1	-2.38833	0	0
AT2G32940	AGO6	3.9597	2.22e-136	1.77e-135			AT1G29740	AT1G29740	-2.38796	3.8e-08	7.33e-08
AT2G17950	WUS	3.95872	2.59e-09	5.19e-09			AT2G39110	AT2G39110	-2.38741	1.17e-57	5.18e-57
AT5G36960	AT5G36960	3.95841	1.18e-12	2.6e-12			AT2G27310	AT2G27310	-2.38526	3.89e-165	3.55e-164
AT2G44990	CCD7	3.95708	8.49e-10	1.73e-09			AT1G32920	AT1G32920	-2.385	0	0
AT3G26480	AT3G26480	3.95392	6.48e-82	3.59e-81			AT1G64590	AT1G64590	-2.38413	1.19e-33	3.98e-33
AT4G29150	IQD25	3.95172	2.15e-92	1.29e-91			AT5G25840	AT5G25840	-2.38137	1.65e-295	2.57e-294
AT5G02780	GSTL1	3.95056	1.25e-103	8.13e-103			AT2G13960	AT2G13960	-2.38093	1.4e-16	3.43e-16
AT2G24850	TAT3	3.95011	4.18e-283	6.22e-282			AT1G43670	AT1G43670	-2.38093	0	0
AT1G58330	ZW2	3.94879	1.07e-11	2.3e-11			AT2G24680	REM12	-2.37963	1.41e-11	3.03e-11
AT4G36110	AT4G36110	3.94615	1.24e-44	4.77e-44			AT3G16540	DegP11	-2.37934	0.000279689	0.000453412
AT1G24270	AT1G24270	3.94533	3.94e-15	9.32e-15			AT5G05580	FAD8	-2.37907	0	0
AT5G03668	AT5G03668	3.94487	1.23e-17	3.1e-17			AT1G65230	AT1G65230	-2.379	0	0
AT4G27210	AT4G27210	3.94334	7.67e-12	1.67e-11			AT3G14415	GLO2	-2.37884	0	0
AT1G75280	AT1G75280	3.94133	0	0			AT5G06320	NHL3	-2.37566	0	0
AT4G26950	AT4G26950	3.94032	5.16e-19	1.34e-18			AT1G47440	AT1G47440	-2.37498	7.29e-12	1.58e-11
AT2G16580	AT2G16580	3.93973	1.86e-106	1.23e-105			AT5G46871	AT5G46871	-2.37441	3.55e-07	6.59e-07
AT5G48670	AGL80	3.93852	1.12e-124	8.36e-124			AT2G11910	AT2G11910	-2.37384	0	0
AT3G52440	DOF3.5	3.93621	1.22e-10	2.55e-10			AT1G61370	AT1G61370	-2.37357	7.21e-97	4.46e-96
AT2G44798	AT2G44798	3.93611	0	0			AT2G26390	AT2G26390	-2.37146	1.93e-08	3.76e-08
AT3G26940	CDG1	3.9231	2.78e-15	6.61e-15			AT5G60350	AT5G60350	-2.37131	5.78e-06	1.02e-05
AT3G54530	AT3G54530	3.92188	1.22e-15	2.92e-15			AT2G28105	AT2G28105	-2.3676	8.03e-26	2.37e-25
AT2G02340	PP2B8	3.92116	6.18e-20	1.64e-19			AT2G03540	AT2G03540	-2.36693	1.21e-16	2.97e-16
AT1G80540	AT1G80540	3.92095	1.04e-15	2.5e-15			AT5G47220	ERF2	-2.3669	4.6e-177	4.51e-176
AT5G46350	WRKY8	3.91579	8.13e-86	4.65e-85			AT1G70860	AT1G70860	-2.36562	4.71e-13	1.06e-12
AT5G36240	AT5G36240	3.91549	8.75e-14	2e-13			AT4G10300	AT4G10300	-2.36546	0	0
AT2G37370	AT2G37370	3.91248	5.42e-54	2.32e-53			AT4G01230	RTNLB7	-2.36385	5.57e-05	9.39e-05
AT1G78320	GSTU23	3.90916	1.4e-175	1.36e-174			AT2G38760	ANN3	-2.36366	3.07e-103	1.99e-102
AT1G05550	AT1G05550	3.90763	4.86e-17	1.21e-16			AT5G39190	GLP5A	-2.36353	1.02e-136	8.15e-136
AT1G79580	SMB	3.90662	2.87e-136	2.28e-135			AT4G13580	DIR18	-2.36349	1.82e-80	9.98e-80
AT4G35640	SAT4	3.89946	2.27e-159	2.02e-158			AT1G03580	AT1G03580	-2.36344	4.08e-142	3.35e-141
AT5G27630	ACBP5	3.89778	0	0			AT1G71697	CK1	-2.36053	1.31e-263	1.8e-262
AT3G57157	AT3G57157	3.8975	3.19e-78	1.71e-77			AT3G05936	AT3G05936	-2.3605	3.3e-39	1.19e-38
AT2G30750	CYP71A12	3.89617	1.83e-166	1.69e-165			AT5G53486	AT5G53486	-2.36049	6.59e-25	1.92e-24
AT5G14690	AT5G14690	3.89405	1.45e-169	1.36e-168			AT5G04140	GLU1	-2.35986	0	0
AT3G21352	AT3G21352	3.89028	1.39e-22	3.89e-22			AT4G01915	AT4G01915	-2.35984	1.07e-128	8.13e-128
AT1G19610	PDF1.4	3.88983	8.86e-124	6.57e-123			AT1G20340	DRT112	-2.35733	0	0
AT4G17690	PER41	3.88697	3.75e-09	7.49e-09			AT3G54810	GATA8	-2.35554	0	0
AT5G51810	GA20OX2	3.88661	4.86e-74	2.51e-73			AT5G07475	AT5G07475	-2.35322	1.49e-53	6.32e-53
AT4G35590	RKD5	3.87528	1.22e-95	7.48e-95			AT3G28080	AT3G28080	-2.35171	4.26e-120	3.09e-119
AT4G21366	AT4G21366	3.87176	4.23e-10	8.71e-10			AT1G21500	AT1G21500	-2.35049	2.58e-232	3.17e-231
AT1G10010	AAP8	3.86716	7.96e-10	1.63e-09			AT4G37410	CYP81F4	-2.34819	0	0
AT5G27360	SFP2	3.86702	0	0			AT1G20490	AT1G20490	-2.34442	4.47e-87	2.57e-86
AT1G32350	AOX3	3.8667	4.08e-94	2.47e-93			AT2G32290	BAM6	-2.34436	2.23e-68	1.09e-67
AT2G04070	DTXL2	3.86303	2.88e-15	6.84e-15			AT5G51110	AT5G51110	-2.34412	0	0
AT3G26010	AT3G26010	3.8617	4.02e-10	8.29e-10			AT3G44870	AT3G44870	-2.34275	0.000155733	0.000256597
AT1G22250	AT1G22250	3.8599	0	0			AT3G29190	TPS15	-2.34229	0.000270965	0.000439687
AT1G11170	AT1G11170	3.85981	0	0			AT1G73885	AT1G73885	-2.34165	0	0
AT5G08360	AT5G08360	3.85795	3.1e-173	2.97e-172			AT1G22885	AT1G22885	-2.34094	4.64e-249	6.04e-248
AT2G31425	AT2G31425	3.85763	3.23e-09	6.46e-09			AT4G02850	AT4G02850	-2.34039	2.14e-17	5.35e-17
AT1G51530	AT1G51530	3.85675	7.67e-22	2.1e-21			AT4G37930	SHM1	-2.34001	0	0
AT5G04010	NSFBX	3.85489	7.21e-33	2.38e-32			AT3G13061	AT3G13061	-2.33736	3.57e-11	7.6e-11
AT2G32487	AT2G32487	3.85487	6.49e-143	5.35e-142			AT3G06890	AT3G06890	-2.33691	4.82e-53	2.04e-52
AT3G45860	CRK4	3.85192	5.5e-251	7.22e-250			AT5G45276	AT5G45276	-2.33425	0.000355641	0.000572659
AT3G23460	AT3G23460	3.8497	1.06e-10	2.22e-10			AT3G15620	UVR3	-2.3341	1.86e-294	2.89e-293
AT5G44306	AT5G44306	3.84848	5.41e-14	1.24e-13			AT5G61900	BON1	-2.33333	3.59e-28	1.1e-27
AT4G29550	AT4G29550	3.84578	6.18e-105	4.06e-104			AT1G21100	AT1G21100	-2.33318	0	0
AT1G12200	AT1G12200	3.84222	0	0			AT3G62260	AT3G62260	-2.33316	2.05e-194	2.18e-193
AT2G32960	AT2G32960	3.84024	0	0			AT1G62400	HT1	-2.33273	3.79e-108	2.54e-107
AT1G75300	AT1G75300	3.83907	6.73e-53	2.85e-52			AT4G01890	AT4G01890	-2.33229	0.000210059	0.000343205
AT3G48700	CXE13	3.83876	2e-38	7.13e-38			AT4G17810	AT4G17810	-2.33007	3.25e-103	2.11e-102
AT1G30100	NCED5	3.83414	1.34e-15	3.21e-15			AT4G37010	CML19	-2.32894	2.01e-213	2.3e-212
AT5G07490	AT5G07490	3.83179	7.08e-09	1.4e-08			AT4G02830	AT4G02830	-2.3283	3.28e-33	1.09e-32
AT4G17670	AT4G17670	3.83126	0	0			AT5G01530	LHCB4.1	-2.32826	8.45e-259	1.14e-257
AT5G56060	AT5G56060	3.83067	6.49e-09	1.29e-08			AT5G56960	BHLH41	-2.32812	6.93e-05	0.00011639
AT1G64540	AT1G64540	3.82676	3.21e-28	9.91e-28			AT1G61590	AT1G61590	-2.32803	1.32e-100	8.43e-100
AT1G48100	AT1G48100	3.82622	4.13e-106	2.74e-105			AT3G08920	STR10	-2.32723	3.37e-198	3.63e-197
AT1G71380	CEL3	3.8258	1.69e-95	1.03e-94			AT4G28080	AT4G28080	-2.32708	0	0
AT3G48660	AT3G48660	3.82287	6.55e-127	4.94e-126			AT3G51420	SSL4	-2.32665	0	0
AT3G50030	AT3G50030	3.82082	8.34e-39	2.99e-38			AT5G17670	AT5G17670	-2.32507	0	0
AT3G13130	AT3G13130	3.80458	9.1e-12	1.97e-11			AT3G15500	NAC055	-2.32413	1.99e-108	1.33e-107
AT4G25010	SWEET14	3.80446	6.31e-16	1.52e-15			AT5G39160	GLP2A	-2.32339	1.19e-68	5.85e-68
AT1G04880	HMGB15	3.79632	6.03e-61	2.76e-60			AT1G62750	CPEFG	-2.32336	0	0
AT2G40200	BHLH51	3.79499	5.5e-49	2.23e-48			AT3G63140	CSP41A	-2.32324	0	0
AT1G66700	PXMT1	3.79002	9.79e-54	4.17e-53			AT5G41810	AT5G41810	-2.32314	0	0
AT4G28556	RIC7	3.79001	4.3e-14	9.9e-14			AT1G69020	AT1G69020	-2.32312	2.25e-66	1.09e-65
AT1G32900	GBSS1	3.78941	0	0			AT2G44790	UCC2	-2.32309	0	0
AT4G12480	EARLI1	3.78897	0	0			AT2G27660	AT2G27660	-2.32297	2.04e-107	1.36e-106
AT1G73040	JAL19	3.78832	1.31e-73	6.73e-73			AT2G40140	CZF1	-2.32286	0	0
AT2G02850	ARPN	3.7875	0	0			AT3G11750	FOLB1	-2.32191	5.75e-61	2.63e-60
AT5G18510	AT5G18510	3.785	3.37e-10	6.97e-10			AT1G47520	AT1G47520	-2.32064	3.39e-80	1.85e-79
AT2G23170	GH3.3	3.77943	0	0			AT4G25400	BHLH118	-2.32023	1.79e-24	5.15e-24
AT4G04490	CRK36	3.7788	5.34e-62	2.47e-61			AT3G27070	TOM20-1	-2.31992	2.6e-07	4.86e-07
AT1G26400	AT1G26400	3.77502	6.24e-09	1.24e-08			AT1G77490	APXT	-2.3194	0	0
AT5G02490	MED37D	3.77079	0	0			AT1G53350	RPP8L2	-2.31878	5.15e-95	3.14e-94
AT1G34047	AT1G34047	3.76986	1.29e-16	3.18e-16			AT4G27520	ENODL2	-2.31791	0	0
AT5G17780	AT5G17780	3.76848	2.06e-290	3.15e-289			AT4G00150	SCL6	-2.31749	2.18e-242	2.77e-241
AT5G03480	AT5G03480	3.76274	6.73e-13	1.5e-12			AT5G38450	CYP735A1	-2.3132	5.3e-10	1.09e-09
AT1G75920	AT1G75920	3.76262	3.74e-12	8.17e-12			AT5G47900	AT5G47900	-2.31301	3.85e-153	3.33e-152
AT1G26560	BGLU40	3.74984	0	0			AT1G65190	AT1G65190	-2.31101	0	0
AT1G13755	AT1G13755	3.74897	1.24e-08	2.43e-08			AT1G20350	TIM17-1	-2.30833	2.91e-28	8.98e-28
AT4G21380	SD18	3.74764	1e-197	1.08e-196			AT5G56490	GULLO4	-2.30827	8.79e-13	1.95e-12
AT1G71002	MIR858A	3.74378	1.08e-08	2.14e-08			AT5G13580	ABCG6	-2.30767	4.16e-92	2.49e-91
AT5G35960	AT5G35960	3.74318	6.09e-36	2.1e-35			AT1G19371	MIR169H	-2.30669	0.000605253	0.000961529
AT1G80865	AT1G80865	3.74256	4.37e-09	8.71e-09			AT2G37540	AT2G37540	-2.30543	0	0
AT3G26830	CYP71B15	3.73896	2.09e-304	3.35e-303			AT4G20240	CYP71A27	-2.30505	1.95e-92	1.17e-91
AT5G09540	AT5G09540	3.73668	1.71e-245	2.2e-244			AT4G03280	PETC	-2.30476	0	0
AT4G19590	AT4G19590	3.73236	1.02e-23	2.89e-23			AT2G40960	AT2G40960	-2.30433	1.06e-74	5.51e-74
AT3G13898	EPFL3	3.73017	4.16e-18	1.06e-17			AT2G36430	AT2G36430	-2.30429	5.72e-81	3.14e-80
AT3G11325	AT3G11325	3.72985	1.75e-09	3.54e-09			AT2G43560	FKBP16-3	-2.30348	0	0
AT1G65300	PHE2	3.72805	5.36e-10	1.1e-09			AT2G46070	MPK12	-2.30279	6.17e-125	4.6e-124
AT3G51238	AT3G51238	3.72668	2.08e-78	1.12e-77			AT5G25970	AT5G25970	-2.30232	1.67e-17	4.19e-17
AT3G56700	FAR6	3.72546	1.88e-09	3.79e-09			AT2G15350	FUT10	-2.30119	6.19e-05	0.000104253
AT4G31760	PER46	3.72481	8.31e-27	2.49e-26			AT4G13620	ERF062	-2.30118	2.48e-16	6.06e-16
AT3G29788	AT3G29788	3.72142	5.45e-09	1.08e-08			AT2G22540	SVP	-2.30063	0	0
AT5G11360	AT5G11360	3.71903	3.66e-28	1.13e-27			AT4G04330	AT4G04330	-2.29826	0	0
AT1G47400	AT1G47400	3.71687	1.04e-87	6.03e-87			AT2G30950	FTSH2	-2.29625	0	0
AT4G39700	AT4G39700	3.71455	5.5e-119	3.97e-118			AT5G38970	CYP85A1	-2.29587	5.8e-09	1.15e-08
AT2G22240	IPS2	3.71199	0	0			AT2G02300	PP2B5	-2.29373	2.32e-05	3.99e-05
AT1G24590	ESR2	3.71055	3.26e-16	7.93e-16			AT5G13100	AT5G13100	-2.29323	0	0
AT2G36261	AT2G36261	3.7075	3.42e-09	6.85e-09			AT4G18280	AT4G18280	-2.29263	3.79e-267	5.3e-266
AT4G08691	AT4G08691	3.70583	1.17e-08	2.3e-08			AT3G14185	AT3G14185	-2.29247	6.51e-06	1.15e-05
AT3G47400	PME33	3.70485	1.3e-279	1.91e-278			AT2G32500	AT2G32500	-2.29109	7.95e-223	9.44e-222
AT5G11410	AT5G11410	3.70436	3.56e-77	1.89e-76			AT5G19473	AT5G19473	-2.28928	0.000366043	0.000588991
AT3G11165	AT3G11165	3.70129	3.66e-12	8.01e-12			AT1G68650	AT1G68650	-2.28872	1.49e-49	6.09e-49
AT3G02040	GDPD1	3.69769	0	0			AT3G50290	AT3G50290	-2.28783	1.05e-06	1.91e-06
AT1G23000	AT1G23000	3.69714	0	0			AT3G06500	INVC	-2.28723	0	0
AT5G53895	AT5G53895	3.69655	2.1e-67	1.02e-66			AT2G39430	DIR9	-2.28656	3.05e-71	1.54e-70
AT4G31690	REM9	3.69475	3.56e-11	7.59e-11			AT4G01240	AT4G01240	-2.28632	1.25e-16	3.07e-16
AT4G35263	AT4G35263	3.69474	2.35e-08	4.57e-08			AT4G24770	CP31A	-2.2848	0	0
AT3G11180	AT3G11180	3.69261	3.91e-08	7.54e-08			AT1G60190	PUB19	-2.28423	8.08e-71	4.05e-70
AT4G16590	ATCSLA01	3.6885	2.01e-08	3.92e-08			AT1G76250	AT1G76250	-2.28414	1.83e-24	5.28e-24
AT3G27220	AT3G27220	3.6872	0	0			AT1G44740	AT1G44740	-2.28388	1.15e-10	2.42e-10
AT4G30250	AT4G30250	3.68568	4.91e-67	2.38e-66			AT5G24230	AT5G24230	-2.28286	1.9e-33	6.32e-33
AT2G43535	ATTI4	3.6808	0	0			AT4G15670	GRXS7	-2.28229	1.88e-35	6.43e-35
AT5G18010	SAUR19	3.68058	4.56e-17	1.13e-16			AT5G64850	AT5G64850	-2.28199	0	0
AT1G01250	ERF023	3.66622	6.4e-66	3.07e-65			AT4G04990	AT4G04990	-2.28154	4.81e-24	1.38e-23
AT1G22170	AT1G22170	3.66412	0	0			AT5G58010	BHLH82	-2.28144	1.04e-37	3.67e-37
AT1G08650	PPCK1	3.66264	0	0			AT3G08720	ATPK2	-2.28144	0	0
AT1G02070	AT1G02070	3.6622	1.26e-54	5.43e-54			AT2G04480	AT2G04480	-2.28129	1.22e-05	2.13e-05
AT5G15380	DRM1	3.66187	2.96e-08	5.73e-08			AT1G03630	PORC	-2.28053	0	0
AT5G05040	AT5G05040	3.65955	8.15e-09	1.61e-08			AT3G15850	ADS3	-2.28036	0	0
AT3G26120	TEL1	3.65742	2.53e-25	7.41e-25			AT4G31230	AT4G31230	-2.28032	1.6e-06	2.9e-06
AT1G66110	AT1G66110	3.6554	1.72e-11	3.69e-11			AT4G26690	GDPDL3	-2.27945	0	0
AT3G05190	AT3G05190	3.65534	2.24e-187	2.29e-186			AT1G26610	AT1G26610	-2.27912	3.77e-11	8.01e-11
AT2G40030	NRPE1	3.65395	0	0			AT5G60660	PIP2-4	-2.27894	7.85e-153	6.77e-152
AT5G37300	WSD1	3.64904	4.19e-10	8.64e-10			AT1G48710	AT1G48710	-2.27885	4.17e-09	8.33e-09
AT2G38940	PHT1-4	3.63531	0	0			AT1G47620	CYP96A8	-2.27797	4.77e-09	9.5e-09
AT3G28560	AT3G28560	3.63371	5.46e-12	1.19e-11			AT1G05190	RPL6	-2.27731	0	0
AT2G22426	AT2G22426	3.63181	1.46e-09	2.95e-09			AT4G22890	PGRL1A	-2.27641	0	0
AT1G07490	RTFL3	3.63103	1.85e-22	5.14e-22			AT5G48920	TED7	-2.27562	6.01e-29	1.87e-28
AT2G22810	ACS4	3.63081	2.76e-09	5.53e-09			AT3G06460	AT3G06460	-2.27503	9.96e-28	3.04e-27
AT4G18690	AT4G18690	3.62632	7.74e-09	1.53e-08			AT3G04210	AT3G04210	-2.27479	0	0
AT3G42725	AT3G42725	3.62403	1.87e-53	7.96e-53			AT1G08930	ERD6	-2.27452	0	0
AT2G04050	DTXL1	3.62151	9.17e-302	1.45e-300			AT5G51795	AT5G51795	-2.27378	0.000664295	0.00105251
AT4G34210	ASK11	3.62075	1.44e-13	3.27e-13			AT5G33355	AT5G33355	-2.2732	2.22e-06	4.01e-06
AT3G06360	AGP27	3.62071	5.95e-61	2.72e-60			AT3G26815	MIR169K	-2.27096	0.000127956	0.000211828
AT3G24600	AT3G24600	3.61509	9.5e-14	2.17e-13			AT1G07110	FKFBP	-2.27072	0	0
AT5G04660	CYP77A4	3.61252	7.06e-224	8.39e-223			AT2G21045	STR19	-2.26728	7.23e-231	8.85e-230
AT3G21000	AT3G21000	3.61238	2.77e-20	7.41e-20			AT2G38400	AGT3	-2.26697	0	0
AT3G48240	AT3G48240	3.60826	2.55e-24	7.35e-24			AT1G77060	AT1G77060	-2.26643	0	0
AT4G26050	PIRL8	3.60653	2.84e-22	7.87e-22			AT5G58430	EXO70B1	-2.26546	0	0
AT2G14060	AT2G14060	3.60273	1.03e-21	2.82e-21			AT1G64770	PNSB2	-2.26525	0	0
AT4G08910	AT4G08910	3.6027	1.74e-62	8.09e-62			AT3G20850	AT3G20850	-2.26364	0.000278129	0.000450991
AT1G26410	AT1G26410	3.59982	6.76e-18	1.71e-17			AT1G29070	RPL34	-2.26236	0	0
AT1G20800	AT1G20800	3.59758	7.49e-08	1.43e-07			AT1G49840	AT1G49840	-2.26186	2.06e-200	2.24e-199
AT2G18530	AT2G18530	3.59549	1.79e-08	3.5e-08			AT1G29730	AT1G29730	-2.26169	2.17e-19	5.68e-19
AT2G25940	ALPHA-VPE	3.59516	8.33e-249	1.08e-247			AT1G78995	AT1G78995	-2.26024	3.82e-170	3.61e-169
AT4G09820	TT8	3.59465	7.81e-20	2.07e-19			AT3G47790	ABCA8	-2.25974	4.35e-78	2.33e-77
AT3G48850	MPT2	3.59353	3.73e-16	9.05e-16			AT5G52790	CBSDUF5	-2.25886	4.76e-42	1.77e-41
AT4G20370	TSF	3.59241	6.26e-08	1.2e-07			AT1G43560	Aty2	-2.25878	0	0
AT3G54420	ATEP3	3.59095	1.03e-255	1.38e-254			AT1G65590	HEXO3	-2.25841	0	0
AT3G45093	AT3G45093	3.58909	1.14e-08	2.25e-08			AT1G77690	LAX3	-2.25785	2.33e-303	3.72e-302
AT2G27990	BLH8	3.58837	9.88e-100	6.24e-99			AT4G11470	CRK31	-2.25778	2.47e-16	6.01e-16
AT5G22200	AT5G22200	3.58504	1.13e-24	3.26e-24			AT2G04450	NUDT6	-2.25599	3.38e-05	5.76e-05
AT1G14630	AT1G14630	3.58316	3.37e-243	4.29e-242			AT5G63020	AT5G63020	-2.25554	0	0
AT4G22110	AT4G22110	3.58015	3.81e-45	1.47e-44			AT3G02140	AFP4	-2.25527	1.66e-140	1.35e-139
AT4G22470	AT4G22470	3.57778	1.37e-188	1.41e-187			AT2G01300	AT2G01300	-2.25383	9.05e-105	5.94e-104
AT5G60460	AT5G60460	3.57768	9.47e-140	7.67e-139			AT5G35735	AT5G35735	-2.25348	0	0
AT1G52680	AT1G52680	3.57696	4.76e-08	9.14e-08			AT5G35750	AHK2	-2.25328	0	0
AT5G39370	AT5G39370	3.5769	8.28e-08	1.58e-07			AT1G23480	CSLA3	-2.25081	1.47e-212	1.68e-211
AT4G16540	AT4G16540	3.57532	9.68e-69	4.77e-68			AT3G14420	GLO1	-2.25038	0	0
AT1G16490	ATMYB58	3.57193	1.57e-101	1.01e-100			AT4G13500	AT4G13500	-2.24889	0	0
AT3G47950	AHA4	3.5704	6.19e-275	8.97e-274			AT5G03260	LAC11	-2.24827	5.09e-144	4.21e-143
AT1G11740	AT1G11740	3.56708	1.29e-91	7.7e-91			AT4G19200	AT4G19200	-2.24795	0	0
AT1G11230	AT1G11230	3.56493	5.36e-08	1.03e-07			AT5G21930	PAA2	-2.24744	0	0
AT1G35290	AT1G35290	3.55627	2.93e-56	1.28e-55			AT2G36420	AT2G36420	-2.24684	5.64e-168	5.23e-167
AT5G01660	AT5G01660	3.55442	3.02e-181	3.02e-180			AT2G35380	PER20	-2.24628	1.68e-93	1.01e-92
AT1G17020	SRG1	3.55176	0	0			AT1G32060	PRK	-2.24491	0	0
AT1G66830	AT1G66830	3.55081	1.66e-51	6.93e-51			AT3G28290	AT14A	-2.24462	9.7e-85	5.5e-84
AT3G58270	AT3G58270	3.5473	5.5e-288	8.35e-287			AT2G36590	PROT3	-2.24383	3.84e-28	1.18e-27
AT4G11810	AT4G11810	3.54486	1.92e-32	6.3e-32			AT5G64900	PEP1	-2.24359	5.97e-66	2.87e-65
AT1G73050	AT1G73050	3.54478	1.47e-09	2.98e-09			AT2G48070	RPH1	-2.24301	0	0
AT1G19830	AT1G19830	3.54404	3.38e-40	1.23e-39			AT4G18940	AT4G18940	-2.2426	3.36e-13	7.56e-13
AT3G18630	ATUNG	3.54106	9.84e-102	6.31e-101			AT3G62040	AT3G62040	-2.23863	7.3e-264	1.01e-262
AT3G24225	CLE19	3.54013	7.1e-20	1.88e-19			AT3G28340	GATL10	-2.23628	0	0
AT5G07780	FH19	3.53865	8.69e-56	3.78e-55			AT4G17215	AT4G17215	-2.23619	4.31e-44	1.65e-43
AT1G22150	SULTR1	3.53691	2.62e-17	6.54e-17			AT3G22210	AT3G22210	-2.23502	3.48e-93	2.1e-92
AT5G42530	AT5G42530	3.53186	0	0			AT4G33930	AT4G33930	-2.23335	2.94e-08	5.69e-08
AT1G72590	AT1G72590	3.53179	1.59e-10	3.32e-10			AT1G42970	GAPB	-2.23276	0	0
AT3G15170	NAC054	3.531	2.81e-230	3.43e-229			AT4G38140	ATL18	-2.23266	0.000882724	0.00138778
AT3G27410	AT3G27410	3.529	2.84e-08	5.51e-08			AT5G22690	AT5G22690	-2.23231	0	0
AT2G01422	AT2G01422	3.52504	9.53e-25	2.76e-24			AT5G05410	DREB2A	-2.23057	5.8e-200	6.29e-199
AT2G34202	MIR399D	3.52416	1.86e-20	4.99e-20			AT5G62920	ARR6	-2.22994	2.83e-140	2.3e-139
AT1G43060	AT1G43060	3.52314	1.96e-08	3.83e-08			AT5G65030	AT5G65030	-2.22862	1.6e-10	3.35e-10
AT1G26233	SNOR95	3.51881	1.11e-11	2.41e-11			AT5G48320	AT5G48320	-2.22701	1.44e-17	3.61e-17
AT3G57780	AT3G57780	3.5181	0	0			AT5G23750	AT5G23750	-2.22556	3.74e-117	2.66e-116
AT3G49620	DIN11	3.5174	0	0			AT3G20520	GDPDL5	-2.22522	9.96e-09	1.96e-08
AT5G05390	LAC12	3.51626	1.51e-21	4.13e-21			AT1G51520	AT1G51520	-2.22468	7.01e-42	2.61e-41
AT5G64060	anac103	3.513	4.89e-124	3.63e-123			AT5G62570	CBP60A	-2.22347	0	0
AT3G51240	F3H	3.51219	0	0			AT2G24550	AT2G24550	-2.22345	0	0
AT3G44300	NIT2	3.50883	0	0			AT1G09600	AT1G09600	-2.22302	6.64e-08	1.27e-07
AT5G42280	AT5G42280	3.50714	1.98e-176	1.94e-175			AT5G18600	GRXS2	-2.22283	1.52e-176	1.48e-175
AT4G13985	FBD1	3.50676	1.29e-09	2.62e-09			AT5G16360	AT5G16360	-2.2207	1.8e-301	2.85e-300
AT5G07420	PME49	3.50293	9.02e-08	1.71e-07			AT1G70130	LECRK52	-2.22058	2.27e-10	4.72e-10
AT2G35070	AT2G35070	3.49975	9.38e-19	2.42e-18			AT1G77885	AT1G77885	-2.21886	3.45e-169	3.23e-168
AT3G02670	AT3G02670	3.49974	2.1e-13	4.74e-13			AT4G34190	2024-09-01	-2.21676	0	0
AT2G43580	AT2G43580	3.49901	1.12e-07	2.12e-07			AT2G40520	AT2G40520	-2.21636	8.25e-106	5.45e-105
AT1G15330	PV42A	3.49898	2.33e-237	2.92e-236			AT3G11820	SYP121	-2.21507	0	0
AT4G08093	AT4G08093	3.49759	1.42e-160	1.26e-159			AT1G75030	ATLP-3	-2.21495	3.43e-13	7.7e-13
AT4G08867	AT4G08867	3.49352	6.33e-08	1.21e-07			AT5G39785	AT5G39785	-2.21427	2.44e-134	1.91e-133
AT3G18250	AT3G18250	3.49348	3.16e-61	1.45e-60			AT3G15900	AT3G15900	-2.21414	5.49e-183	5.53e-182
AT3G30393	AT3G30393	3.49187	4.32e-16	1.05e-15			AT1G48400	AT1G48400	-2.21394	0.0007476	0.00118134
AT2G45760	BAP2	3.48679	8.55e-49	3.46e-48			AT1G80240	AT1G80240	-2.21389	2.81e-183	2.83e-182
AT5G52640	HSP81-1	3.48629	0	0			AT3G18780	ACT2	-2.21269	0	0
AT2G32670	VAMP725	3.48424	2.85e-76	1.5e-75			AT5G64380	AT5G64380	-2.21202	6.78e-274	9.76e-273
AT3G14630	CYP72A9	3.48322	1.99e-58	8.89e-58			AT2G46820	CURT1B	-2.21124	0	0
AT5G01670	AT5G01670	3.48162	0	0			AT5G04960	PME46	-2.21119	8.09e-88	4.68e-87
AT4G03040	AT4G03040	3.4793	9.86e-08	1.87e-07			AT4G21280	PSBQ1	-2.2089	0	0
AT3G26290	CYP71B26	3.47898	0	0			AT3G23530	AT3G23530	-2.20838	0	0
AT3G45140	LOX2	3.47693	0	0			AT4G36950	MAPKKK21	-2.20787	3.76e-21	1.02e-20
AT3G10880	AT3G10880	3.46656	2.39e-63	1.12e-62			AT5G59930	AT5G59930	-2.20738	1.65e-12	3.64e-12
AT5G15950	SAMDC2	3.46397	2.1e-220	2.47e-219			AT5G44070	PCS1	-2.20573	0	0
AT4G27480	AT4G27480	3.46353	0	0			AT1G67830	FXG1	-2.20464	7.68e-144	6.35e-143
AT5G07990	CYP75B1	3.45849	3.9e-307	6.34e-306			AT4G08112	AT4G08112	-2.2029	0.00010321	0.000171833
AT1G13430	STO9	3.45776	8.26e-71	4.15e-70			AT1G43010	AT1G43010	-2.20202	0.00076126	0.00120222
AT3G21090	ABCG15	3.4542	0	0			AT2G05540	AT2G05540	-2.20114	0	0
AT3G59140	ABCC10	3.45408	0	0			AT5G46490	AT5G46490	-2.19903	3.15e-88	1.83e-87
AT1G17285	AT1G17285	3.451	3.4e-131	2.63e-130			AT5G64040	PSAN	-2.19755	0	0
AT3G25905	CLE27	3.44785	4.25e-26	1.26e-25			AT1G55010	PDF1.5	-2.19535	7.96e-12	1.73e-11
AT5G60220	TET4	3.44524	2.1e-28	6.5e-28			AT3G10060	FKBP16-4	-2.19464	0	0
AT2G47230	DUF6	3.44184	0	0			AT2G17840	ERD7	-2.19445	0	0
AT4G19430	AT4G19430	3.43878	3.45e-11	7.34e-11			AT3G27210	Y-2	-2.19398	0	0
AT3G44800	AT3G44800	3.43869	1.39e-20	3.75e-20			AT3G24715	AT3G24715	-2.19288	5.32e-87	3.06e-86
AT2G29470	GSTU3	3.43846	1.33e-08	2.61e-08			AT5G45930	CHLI2	-2.19262	0	0
AT1G67750	AT1G67750	3.43834	0	0			AT4G25050	ACP4	-2.19241	0	0
AT3G07120	AT3G07120	3.43796	9.86e-39	3.53e-38			AT2G25080	GPX1	-2.19163	0	0
AT5G41761	AT5G41761	3.43523	2.05e-304	3.28e-303			AT3G06020	FAF4	-2.1908	5.02e-23	1.41e-22
AT5G02200	FHL	3.43486	1.92e-240	2.43e-239			AT5G62865	AT5G62865	-2.19069	7.11e-92	4.24e-91
AT3G59900	ARGOS	3.43474	1.76e-53	7.48e-53			AT3G46480	AT3G46480	-2.19051	0.00113295	0.00177014
AT5G66400	RAB18	3.43393	0	0			AT1G17750	PEPR2	-2.18963	1.29e-178	1.27e-177
AT2G25625	AT2G25625	3.43229	9.8e-26	2.89e-25			AT4G13330	AT4G13330	-2.18931	3.13e-84	1.76e-83
AT4G03965	AT4G03965	3.42807	3.27e-43	1.24e-42			AT1G70800	AT1G70800	-2.18909	1.63e-65	7.78e-65
AT1G21320	AT1G21320	3.42652	4.95e-41	1.82e-40			AT2G27740	AT2G27740	-2.18906	3.5e-28	1.08e-27
AT2G36325	AT2G36325	3.42589	2.36e-11	5.06e-11			AT1G68935	AT1G68935	-2.18784	2.71e-33	8.97e-33
AT5G25390	SHN3	3.42572	4.78e-10	9.83e-10			AT1G50740	FAX5	-2.18784	0	0
AT3G02810	AT3G02810	3.42446	2.26e-09	4.55e-09			AT1G11860	GDCST	-2.18744	0	0
AT2G44910	ATHB-4	3.42107	4.68e-70	2.33e-69			AT5G66900	AT5G66900	-2.1869	0	0
AT1G14250	APY5	3.42083	2.76e-287	4.18e-286			AT1G09070	SRC2	-2.18646	0	0
AT5G20690	PRK6	3.41793	7e-08	1.34e-07			AT2G34860	EDA3	-2.18634	0	0
AT4G39800	IPS1	3.41615	0	0			AT5G50950	FUM2	-2.18548	4.41e-262	6.05e-261
AT5G49330	MYB111	3.41444	2.58e-75	1.35e-74			AT3G15360	ATHM4	-2.18542	0	0
AT4G29305	LCR25	3.41294	2.02e-07	3.79e-07			AT2G26211	MIR825A	-2.18531	3.03e-08	5.86e-08
AT1G66870	AT1G66870	3.41273	2.11e-07	3.96e-07			AT1G30380	PSAK	-2.18452	0	0
AT3G09400	PLL3	3.41124	2.14e-40	7.82e-40			AT2G34910	AT2G34910	-2.18398	1.27e-30	4.07e-30
AT1G35270	AT1G35270	3.41104	3.49e-18	8.88e-18			AT5G61850	LFY	-2.18369	0.000308161	0.000498295
AT1G51035	AT1G51035	3.41057	7.63e-20	2.02e-19			AT4G22640	AT4G22640	-2.18354	1.63e-06	2.94e-06
AT5G25580	AT5G25580	3.41021	2.16e-169	2.02e-168			AT1G51770	AT1G51770	-2.18287	0.000676604	0.00107163
AT4G39210	APL3	3.4095	0	0			AT4G08109	AT4G08109	-2.18281	1.72e-05	2.98e-05
AT1G62580	AT1G62580	3.40877	2.95e-76	1.55e-75			AT3G20935	CYP705A28	-2.18234	3.05e-23	8.63e-23
AT1G34440	AT1G34440	3.40874	9.27e-11	1.95e-10			AT5G28510	BGLU24	-2.18232	0.000888571	0.00139649
AT1G10585	AT1G10585	3.40844	4.05e-33	1.34e-32			AT3G54050	FBP	-2.18136	0	0
AT3G48300	CYP71A23	3.40529	1.51e-23	4.29e-23			AT1G18773	AT1G18773	-2.18131	1.31e-38	4.66e-38
AT5G45730	AT5G45730	3.405	6.94e-102	4.46e-101			AT2G44230	AT2G44230	-2.18064	2.67e-180	2.66e-179
AT4G37295	AT4G37295	3.40373	3.96e-59	1.78e-58			AT3G01480	CYP38	-2.18047	0	0
AT3G53690	AT3G53690	3.40277	2.68e-84	1.51e-83			AT4G13450	AT4G13450	-2.17957	0.00114973	0.00179544
AT1G73325	AT1G73325	3.39994	6.94e-08	1.33e-07			AT3G10930	AT3G10930	-2.177	3.67e-167	3.39e-166
AT2G30380	AT2G30380	3.39824	1.97e-16	4.81e-16			AT3G56650	PPD6	-2.17642	0	0
AT5G20410	MGD2	3.39749	0	0			AT3G03280	AT3G03280	-2.17497	7.21e-28	2.21e-27
AT5G39850	RPS9C	3.39684	0	0			AT1G35350	PHO1-H8	-2.17482	9.54e-238	1.19e-236
AT5G12020	HSP17.6	3.39681	3.14e-18	8.02e-18			AT2G44110	MLO15	-2.17462	3e-35	1.02e-34
AT1G23965	AT1G23965	3.39667	4.44e-13	9.94e-13			AT1G03055	D27	-2.174	1.1e-12	2.43e-12
AT5G66580	AT5G66580	3.39563	2.91e-248	3.78e-247			AT1G55370	NDF5	-2.17382	0	0
AT2G23970	AT2G23970	3.39504	8.8e-17	2.17e-16			AT2G05980	AT2G05980	-2.1737	0.000961124	0.00150756
AT5G17700	AT5G17700	3.39434	0	0			AT4G18340	AT4G18340	-2.17323	3.69e-250	4.83e-249
AT3G44350	NAC061	3.39135	1.36e-32	4.45e-32			AT4G01830	ABCB5	-2.17318	1.91e-06	3.45e-06
AT2G38870	AT2G38870	3.38987	0	0			AT1G33440	NPF4.4	-2.17252	4.69e-51	1.95e-50
AT1G19470	AT1G19470	3.38823	4.45e-09	8.86e-09			AT1G74830	MYOB6	-2.17245	4.14e-13	9.27e-13
AT4G32870	AT4G32870	3.38573	3.82e-282	5.66e-281			AT5G10695	AT5G10695	-2.1724	3.45e-225	4.13e-224
AT3G12580	MED37C	3.38548	0	0			AT4G32340	AT4G32340	-2.17185	0	0
AT4G27190	AT4G27190	3.38444	2.27e-09	4.58e-09			AT5G34795	AT5G34795	-2.17162	1.16e-15	2.79e-15
AT2G15020	AT2G15020	3.38351	3.99e-21	1.08e-20			AT3G18890	TIC62	-2.17102	0	0
AT2G42720	AT2G42720	3.38345	6.05e-105	3.98e-104			AT3G13450	DIN4	-2.1709	0	0
AT2G23190	CYP81D7	3.38251	3.42e-07	6.36e-07			AT1G80610	AT1G80610	-2.17053	1.38e-172	1.32e-171
AT5G18290	SIP1-2	3.37903	1.92e-190	2.01e-189			AT5G07110	PRA1B6	-2.16933	1.33e-70	6.68e-70
AT4G09480	AT4G09480	3.37761	4.7e-25	1.37e-24			AT4G17090	BAM3	-2.16905	0	0
AT1G18180	AT1G18180	3.37727	0	0			AT5G47770	FPS1	-2.16903	0	0
AT3G03770	AT3G03770	3.37652	0	0			AT4G18195	PUP8	-2.16859	1.03e-25	3.04e-25
AT4G24415	MIR824A	3.37621	3.52e-197	3.77e-196			AT2G47140	SDR3B	-2.16693	3.49e-33	1.15e-32
AT3G22231	PCC1	3.37554	3.16e-119	2.28e-118			AT2G23560	MES7	-2.16683	1.86e-17	4.66e-17
AT4G37500	AT4G37500	3.37531	4.31e-07	7.98e-07			AT1G49130	COL8	-2.16669	5.12e-134	4.02e-133
AT1G64110	AT1G64110	3.37482	0	0			AT3G51870	EAAC	-2.16436	0	0
AT3G62760	GSTF13	3.37238	3.67e-44	1.41e-43			AT3G51070	AT3G51070	-2.16354	3.83e-16	9.28e-16
AT5G42780	ZHD13	3.37148	9.74e-201	1.06e-199			AT4G04700	CPK27	-2.16292	1.47e-67	7.16e-67
AT5G17090	AT5G17090	3.36876	3.46e-10	7.16e-10			AT5G02940	AT5G02940	-2.16269	0	0
AT3G48670	IDN2	3.36207	0	0			AT3G29240	AT3G29240	-2.16246	0	0
AT2G30984	AT2G30984	3.35931	2.41e-07	4.51e-07			AT3G15760	AT3G15760	-2.16244	6.83e-71	3.43e-70
AT1G01480	ACS2	3.35567	7.05e-104	4.6e-103			AT5G01540	LECRK62	-2.16121	9.24e-88	5.34e-87
AT2G42885	AT2G42885	3.35281	3.77e-16	9.16e-16			AT5G46800	BOU	-2.16023	0	0
AT3G61900	AT3G61900	3.34963	2.36e-41	8.73e-41			AT1G57770	AT1G57770	-2.15957	0	0
AT3G23120	AtRLP38	3.34492	6.18e-35	2.1e-34			AT3G14160	AT3G14160	-2.15934	3.68e-52	1.54e-51
AT5G58660	AT5G58660	3.34443	3.22e-284	4.8e-283			AT3G61640	AGP20	-2.15933	2.27e-305	3.65e-304
AT1G54530	AT1G54530	3.34419	5.25e-83	2.94e-82			AT1G73340	AT1G73340	-2.15913	1e-30	3.21e-30
AT1G17744	AT1G17744	3.34392	2.44e-11	5.22e-11			AT2G39730	RCA	-2.1591	0	0
AT5G56080	NAS2	3.34115	1.26e-48	5.06e-48			AT1G12900	GAPA2	-2.15875	0	0
AT1G30050	AT1G30050	3.34033	2.59e-19	6.78e-19			AT1G08900	SUGTL3	-2.15816	8.24e-266	1.14e-264
AT1G21520	AT1G21520	3.34026	0	0			AT1G51870	AT1G51870	-2.15625	2.13e-11	4.58e-11
AT2G45420	LBD18	3.33903	8.76e-45	3.38e-44			AT1G62780	AT1G62780	-2.15624	0	0
AT4G29240	AT4G29240	3.33757	4.94e-305	7.93e-304			AT3G28300	AT14A	-2.15587	1.23e-81	6.81e-81
AT4G31020	AT4G31020	3.33746	1.5e-105	9.92e-105			AT5G61270	BHLH72	-2.1555	2.55e-154	2.21e-153
AT3G17010	AT3G17010	3.33543	3.6e-09	7.19e-09			AT4G28040	AT4G28040	-2.15451	0	0
AT5G13330	ERF113	3.33518	0	0			AT1G29110	AT1G29110	-2.1541	9.22e-09	1.82e-08
AT1G10520	AT1G10520	3.33492	3.6e-126	2.7e-125			AT5G38510	AT5G38510	-2.15405	0	0
AT5G09300	T5E8_100	3.33294	0	0			AT2G38790	AT2G38790	-2.15101	1.8e-164	1.64e-163
AT2G35550	BPC7	3.33187	2.22e-95	1.36e-94			AT5G17870	PSRP6	-2.14998	0	0
AT2G46950	CYP709B2	3.33074	9.29e-43	3.49e-42			AT1G01560	MPK11	-2.14782	9.67e-67	4.68e-66
AT2G24560	AT2G24560	3.32703	1.06e-08	2.08e-08			AT5G28280	AT5G28280	-2.14776	0.000141317	0.000233381
AT2G24010	scpl23	3.32403	1.6e-29	5.04e-29			AT4G24972	TPD1	-2.14626	4.65e-164	4.23e-163
AT1G66960	LUP5	3.32395	2.48e-18	6.34e-18			AT1G44542	AT1G44542	-2.14571	0.00053341	0.000850319
AT2G33080	AtRLP28	3.32328	1.79e-07	3.36e-07			AT3G54890	LHCA1	-2.1453	0	0
AT1G74030	ENO1	3.32321	0	0			AT4G07868	AT4G07868	-2.14468	0.00103247	0.00161677
AT3G13784	AtcwINV5	3.32033	2.55e-12	5.6e-12			AT1G23870	TPS9	-2.14459	0	0
AT2G22600	AT2G22600	3.31973	1.65e-45	6.4e-45			AT1G74730	AT1G74730	-2.14449	0	0
AT1G19960	AT1G19960	3.31964	9.24e-93	5.55e-92			AT3G52535	AT3G52535	-2.14443	4.41e-57	1.94e-56
AT2G21640	AT2G21640	3.31718	1.79e-268	2.51e-267			AT1G61660	BHLH112	-2.1443	0	0
AT4G15200	FH3	3.31303	7.07e-07	1.3e-06			AT4G21445	AT4G21445	-2.14334	1.09e-103	7.1e-103
AT1G13608	AT1G13608	3.31219	3.01e-08	5.83e-08			AT5G27420	ATL31	-2.14215	8.59e-144	7.09e-143
AT5G25820	AT5G25820	3.3106	0	0			AT1G31330	PSAF	-2.14186	0	0
AT1G53080	AT1G53080	3.30955	3.32e-13	7.47e-13			AT4G26010	PER44	-2.14179	1.11e-130	8.53e-130
AT3G50940	AT3G50940	3.30645	2.3e-42	8.59e-42			AT1G08610	AT1G08610	-2.14144	2.05e-119	1.48e-118
AT1G44050	AT1G44050	3.30113	2.56e-31	8.26e-31			AT3G28070	AT3G28070	-2.14046	4.77e-111	3.26e-110
AT5G57320	VLN5	3.30065	9.77e-302	1.55e-300			AT1G61520	LHCA3	-2.14034	0	0
AT5G47550	CYS5	3.29997	3.71e-276	5.39e-275			AT3G47860	CHL	-2.13978	0	0
AT3G43205	AT3G43205	3.29854	6.88e-07	1.26e-06			AT3G16140	PSAH1	-2.13923	2.26e-280	3.32e-279
AT5G63580	FLS2	3.29754	2.23e-78	1.2e-77			AT5G67450	AZF1	-2.13902	5.3e-39	1.9e-38
AT3G16980	NRPB9A	3.29622	1.09e-62	5.07e-62			AT5G43200	AT5G43200	-2.13851	0.00148968	0.00230664
AT1G11040	AT1G11040	3.29537	1.13e-13	2.57e-13			AT3G02060	AT3G02060	-2.13837	0	0
AT1G21310	EXT3	3.29134	6.35e-175	6.15e-174			AT4G19160	AT4G19160	-2.13813	0	0
AT1G53700	WAG1	3.29066	1.88e-36	6.52e-36			AT5G08650	AT5G08650	-2.13777	0	0
AT4G10260	AT4G10260	3.29009	8.33e-07	1.52e-06			AT5G07020	AT5G07020	-2.13723	0	0
AT4G32295	AT4G32295	3.28802	8.93e-174	8.61e-173			AT3G46880	AT3G46880	-2.13721	6.48e-06	1.14e-05
AT2G43000	JUB1	3.28659	9.76e-65	4.63e-64			AT1G73090	AT1G73090	-2.1371	1.29e-172	1.23e-171
AT3G23090	AT3G23090	3.2863	0	0			AT3G50800	AT3G50800	-2.13669	3.67e-55	1.58e-54
AT3G14370	WAG2	3.28616	1.02e-97	6.33e-97			AT5G60610	AT5G60610	-2.13652	7.33e-11	1.55e-10
AT1G10530	AT1G10530	3.28421	1.95e-87	1.12e-86			AT1G20400	AT1G20400	-2.13583	2.7e-07	5.04e-07
AT1G24540	CYP86C1	3.28396	1.56e-08	3.04e-08			AT4G38830	CRK26	-2.13558	1.58e-15	3.78e-15
AT3G27500	AT3G27500	3.28309	8.55e-53	3.61e-52			AT5G44578	AT5G44578	-2.13553	1.32e-10	2.78e-10
AT4G21490	NDB3	3.28286	2.15e-13	4.86e-13			AT5G43750	PNSB5	-2.13548	0	0
AT5G07520	GRP18	3.28274	4.35e-07	8.05e-07			AT3G50820	PSBO2	-2.13523	0	0
AT4G04293	AT4G04293	3.28181	1.62e-08	3.17e-08			AT5G26742	RH3	-2.13301	0	0
AT5G17040	UGT78D4	3.28066	3.52e-46	1.38e-45			AT4G15340	PEN1	-2.13237	1.66e-116	1.18e-115
AT4G04810	MSRB4	3.27927	2.67e-159	2.37e-158			AT4G26380	AT4G26380	-2.13182	0.00138668	0.00215301
AT5G48950	DHNAT2	3.27857	1.19e-115	8.4e-115			AT3G44710	AT3G44710	-2.13139	4.4e-05	7.46e-05
AT5G25190	ERF003	3.27694	2.1e-194	2.23e-193			AT5G10750	AT5G10750	-2.13055	0	0
AT5G14000	anac084	3.27426	0	0			AT5G41100	AT5G41100	-2.12991	7.63e-301	1.2e-299
AT1G78360	GSTU21	3.27336	1.15e-09	2.33e-09			AT3G13435	AT3G13435	-2.12986	7.11e-26	2.1e-25
AT5G07460	MRSA2	3.2714	0	0			AT3G02880	AT3G02880	-2.12974	0	0
AT1G49005	CLE11	3.27093	2.2e-09	4.42e-09			AT5G09320	VPS9B	-2.12885	1e-113	6.98e-113
AT1G24620	CML25	3.27081	1.08e-17	2.71e-17			AT5G09530	AT5G09530	-2.12847	5.26e-133	4.1e-132
AT5G24280	GMI1	3.26482	0	0			AT3G25690	CHUP1	-2.12774	0	0
AT3G13400	sks13	3.26069	9.98e-08	1.89e-07			AT3G63160	AT3G63160	-2.12724	0	0
AT5G50335	AT5G50335	3.25893	3.89e-96	2.4e-95			AT1G13260	RAV1	-2.12591	0	0
AT2G21220	AT2G21220	3.25867	1.04e-35	3.56e-35			AT1G14040	PHO1	-2.1253	2.25e-285	3.38e-284
AT1G21525	AT1G21525	3.2583	7.96e-27	2.39e-26			AT1G64680	AT1G64680	-2.12485	0	0
AT2G25095	MIR156A	3.25545	9.5e-23	2.66e-22			AT2G05620	PGR5	-2.12437	0	0
AT5G40316	AT5G40316	3.25455	1.42e-07	2.68e-07			AT4G34930	AT4G34930	-2.12435	2.55e-22	7.08e-22
AT1G35310	MLP168	3.25411	1.88e-51	7.84e-51			AT3G59080	AT3G59080	-2.12416	0	0
AT1G60750	AT1G60750	3.253	3.27e-33	1.08e-32			AT3G51075	AT3G51075	-2.12362	2.2e-51	9.14e-51
AT3G44310	NIT1	3.25143	0	0			AT5G26300	AT5G26300	-2.12299	2.87e-05	4.91e-05
AT5G53420	AT5G53420	3.25024	0	0			AT3G23250	MYB15	-2.12159	5.16e-63	2.41e-62
AT5G23810	AAP7	3.25006	0	0			AT4G32060	AT4G32060	-2.12127	0	0
AT5G42120	LECRKS6	3.24667	1.1e-16	2.71e-16			AT5G58750	AT5G58750	-2.11997	6.3e-38	2.23e-37
AT1G29195	AT1G29195	3.24596	4.56e-80	2.48e-79			AT1G30720	AT1G30720	-2.11922	7.22e-159	6.39e-158
AT5G56970	CKX3	3.24186	1.27e-34	4.28e-34			AT1G78410	VQ10	-2.11862	1.23e-34	4.17e-34
AT5G28910	AT5G28910	3.2403	1.62e-147	1.36e-146			AT1G80180	AT1G80180	-2.11714	0	0
AT1G32860	AT1G32860	3.23261	0	0			AT5G03390	AT5G03390	-2.11664	3.29e-10	6.8e-10
AT1G70830	MLP28	3.23073	0	0			AT4G40020	AT4G40020	-2.11605	6.78e-05	0.000113949
AT5G57790	AT5G57790	3.22877	3.75e-227	4.52e-226			AT1G75690	LQY1	-2.11512	0	0
AT3G24450	AT3G24450	3.2287	1.05e-222	1.24e-221			AT5G15190	AT5G15190	-2.11411	1e-102	6.5e-102
AT4G04610	2024-04-01	3.22584	0	0			AT1G24320	GCS2	-2.11371	1.04e-20	2.81e-20
AT3G54410	AT3G54410	3.2253	1.6e-06	2.9e-06			AT2G37220	CP29B	-2.11031	0	0
AT3G50870	GATA18	3.224	6.33e-71	3.18e-70			AT1G50450	AT1G50450	-2.11023	0	0
AT3G61930	AT3G61930	3.22386	4.29e-30	1.36e-29			AT5G03270	AT5G03270	-2.11014	7.85e-05	0.000131631
AT3G14395	AT3G14395	3.2235	2.05e-16	5.01e-16			AT3G27831	AT3G27831	-2.10988	0.00172481	0.00265954
AT2G42540	COR15A	3.22221	1.95e-191	2.04e-190			AT5G44130	FLA13	-2.10976	0	0
AT2G43270	AT2G43270	3.22128	1.11e-07	2.11e-07			AT1G54500	AT1G54500	-2.1093	0	0
AT4G24080	ALL1	3.22092	4.32e-36	1.49e-35			AT1G57590	PAE2	-2.10786	5.65e-16	1.37e-15
AT1G58225	AT1G58225	3.2203	6.87e-15	1.61e-14			AT1G07050	AT1G07050	-2.10672	0	0
AT1G21360	GLTP2	3.21941	7.13e-228	8.62e-227			AT1G73655	FKBP17-3	-2.10659	0	0
AT3G04530	PPCK2	3.21854	6.1e-98	3.8e-97			AT1G78440	GA2OX1	-2.1062	0.00173711	0.00267744
AT1G69490	NAC029	3.2164	2.77e-127	2.09e-126			AT5G47980	BAHD1	-2.10602	2.68e-20	7.16e-20
AT2G40470	LBD15	3.2133	2.3e-66	1.11e-65			AT5G17650	AT5G17650	-2.10478	8.75e-122	6.42e-121
AT5G38000	AT5G38000	3.20449	4.14e-22	1.14e-21			AT4G30430	TET9	-2.10367	8.36e-14	1.91e-13
AT5G24655	LSU4	3.203	4.75e-21	1.29e-20			AT1G49960	NAT4	-2.10092	1.56e-43	5.91e-43
AT5G46013	AT5G46013	3.20234	1.62e-06	2.94e-06			AT3G30867	AT3G30867	-2.10078	1.48e-06	2.69e-06
AT4G36430	PER49	3.20096	4.16e-260	5.68e-259			AT1G24420	AT1G24420	-2.09809	0.000100743	0.000167858
AT1G26762	AT1G26762	3.20075	2.49e-09	5.01e-09			AT5G11450	PPD5	-2.09787	0	0
AT4G31660	REM7	3.1983	1.77e-06	3.2e-06			AT1G67090	RBCS-1A	-2.09687	0	0
AT4G30180	AT4G30180	3.19647	2.87e-31	9.23e-31			AT1G05220	AT1G05220	-2.09647	6.44e-13	1.44e-12
AT3G27095	AT3G27095	3.19511	1.22e-14	2.85e-14			AT4G16355	AT4G16355	-2.09539	0.000333415	0.000537887
AT3G17150	AT3G17150	3.19324	1.77e-06	3.2e-06			AT5G64660	PUB27	-2.0944	2.09e-222	2.48e-221
AT3G44770	AT3G44770	3.18874	1.7e-44	6.53e-44			AT1G01320	AT1G01320	-2.09431	0	0
AT2G37740	ATZFP10	3.18687	3.08e-19	8.04e-19			AT2G43550	ATTI6	-2.09406	3.05e-116	2.16e-115
AT2G02320	PP2B7	3.18608	4.16e-08	8.02e-08			AT3G25655	IDL1	-2.09395	5.93e-17	1.47e-16
AT1G19250	FMO1	3.18584	6.1e-87	3.51e-86			AT3G19680	AT3G19680	-2.09381	0	0
AT5G38780	AT5G38780	3.1839	8.39e-106	5.54e-105			AT5G07152	AT5G07152	-2.09315	5e-37	1.75e-36
AT1G48670	AT1G48670	3.18179	4.67e-10	9.62e-10			AT1G35186	AT1G35186	-2.09212	0.0013394	0.00208233
AT1G55050	AT1G55050	3.18126	1.5e-101	9.58e-101			AT4G09010	TL29	-2.09179	0	0
AT2G45870	AT2G45870	3.18066	1.23e-170	1.16e-169			AT4G03935	AT4G03935	-2.09117	3.83e-89	2.24e-88
AT5G02230	AT5G02230	3.17993	0	0			AT1G21680	AT1G21680	-2.09114	0	0
AT4G28410	AT4G28410	3.1784	0	0			AT5G08610	RH26	-2.09083	0	0
AT2G27040	AGO4	3.1779	0	0			AT5G66570	PSBO1	-2.08977	0	0
AT2G46450	CNGC12	3.17558	0	0			AT1G23830	AT1G23830	-2.08965	6.27e-40	2.27e-39
AT4G03038	AT4G03038	3.17539	1.93e-06	3.48e-06			AT3G24065	AT3G24065	-2.08947	0.00177877	0.00273917
AT5G50800	SWEET13	3.17041	6.4e-22	1.76e-21			AT5G63900	AT5G63900	-2.08935	0.00154103	0.00238344
AT1G53860	AT1G53860	3.17033	2.37e-62	1.1e-61			AT5G65158	AT5G65158	-2.08922	8.59e-05	0.000143589
AT1G52110	AT1G52110	3.17008	1.78e-21	4.85e-21			AT4G29180	RHS16	-2.08888	6.3e-37	2.2e-36
AT1G63440	HMA5	3.16949	0	0			AT1G12250	AT1G12250	-2.08815	0	0
AT1G29490	SAUR68	3.16868	3.38e-07	6.29e-07			AT1G64195	AT1G64195	-2.08808	0.00136015	0.00211338
AT4G35180	LHT7	3.16779	3.5e-106	2.32e-105			AT2G01530	MLP329	-2.08783	0	0
AT1G32880	AT1G32880	3.16772	1.2e-07	2.28e-07			AT1G22490	BHLH94	-2.08715	1.59e-29	4.99e-29
AT2G01610	AT2G01610	3.16604	8.51e-208	9.56e-207			AT1G68620	CXE6	-2.08554	4.14e-71	2.08e-70
AT1G09960	SUC4	3.16559	0	0			AT5G36120	CCB3	-2.08511	8.93e-239	1.12e-237
AT5G28000	AT5G28000	3.16058	2.24e-06	4.03e-06			AT4G38160	pde191	-2.08472	0	0
AT1G75610	AT1G75610	3.16026	6.47e-11	1.37e-10			AT5G61410	RPE	-2.08403	0	0
AT1G53490	HEI10	3.15706	1.24e-122	9.14e-122			AT2G20080	AT2G20080	-2.08305	3.73e-15	8.82e-15
AT1G04770	AT1G04770	3.15628	0	0			AT3G20420	RTL2	-2.08177	1.31e-15	3.14e-15
AT2G38060	ANTR3	3.15619	2.15e-116	1.53e-115			AT4G35250	AT4G35250	-2.08123	0	0
AT2G45570	CYP76C2	3.15403	3.94e-34	1.32e-33			AT4G08300	AT4G08300	-2.08086	2.49e-43	9.43e-43
AT3G14362	DVL19	3.15371	5.91e-79	3.19e-78			AT2G22122	AT2G22122	-2.08059	1.17e-173	1.13e-172
AT4G31877	MIR156C	3.15313	1.6e-120	1.16e-119			AT3G51540	AT3G51540	-2.07836	1.26e-22	3.53e-22
AT5G44210	ERF9	3.15299	5.37e-62	2.48e-61			AT3G62910	APG3	-2.07706	0	0
AT1G52400	BGLU18	3.15227	0	0			AT5G51190	ERF105	-2.07622	0	0
AT5G47060	AT5G47060	3.15177	0	0			AT1G51820	AT1G51820	-2.07594	4.54e-23	1.28e-22
AT1G63960	AT1G63960	3.14759	1.15e-06	2.09e-06			AT2G45685	AT2G45685	-2.07486	2.12e-05	3.65e-05
AT2G46440	CNGC11	3.14537	3.84e-161	3.44e-160			AT3G11170	FAD7	-2.07445	0	0
AT3G16175	AT3G16175	3.14451	1.37e-48	5.53e-48			AT3G06980	RH50	-2.07268	0	0
AT1G53708	RTFL9	3.14412	5.72e-36	1.97e-35			AT2G41560	ACA4	-2.07165	0	0
AT2G14610	PR1	3.14129	2.37e-62	1.1e-61			AT3G51760	AT3G51760	-2.07087	5.36e-92	3.2e-91
AT2G46790	APRR9	3.13959	1.02e-40	3.73e-40			AT5G55220	TIG	-2.07076	0	0
AT3G22560	AT3G22560	3.13858	2.93e-20	7.82e-20			AT4G01090	AT4G01090	-2.07072	0	0
AT3G09922	IPS1	3.13802	0	0			AT2G31020	ORP1A	-2.0705	5.75e-117	4.09e-116
AT5G65070	MAF4	3.13669	2.02e-116	1.43e-115			AT1G01470	LEA14	-2.07041	0	0
AT3G30460	AT3G30460	3.13519	4.06e-38	1.44e-37			AT4G36530	AT4G36530	-2.07029	0	0
AT1G09380	AT1G09380	3.13337	2.31e-18	5.92e-18			AT5G63450	CYP94B1	-2.06979	1.19e-27	3.63e-27
AT4G26590	OPT5	3.1324	3.17e-221	3.73e-220			AT1G79529	AT1G79529	-2.06913	8.89e-22	2.44e-21
AT1G14520	MIOX1	3.12967	0	0			AT5G61560	PUB51	-2.06893	1e-142	8.24e-142
AT2G21320	BBX18	3.12934	2.74e-31	8.83e-31			AT4G26090	RPS2	-2.06742	1.14e-19	3.02e-19
AT3G25640	AT3G25640	3.12746	4.49e-75	2.34e-74			AT1G74970	RPS9	-2.06686	0	0
AT1G15580	IAA5	3.1261	2.34e-11	5.01e-11			AT3G10600	CAT7	-2.06683	3.36e-05	5.72e-05
AT1G52120	JAL12	3.12548	1.07e-08	2.11e-08			AT5G03010	AT5G03010	-2.06629	0.00203325	0.00311714
AT1G16360	ALIS4	3.12497	5.73e-30	1.82e-29			AT2G26215	AT2G26215	-2.06535	7.45e-19	1.93e-18
AT3G25130	AT3G25130	3.12406	3.65e-97	2.27e-96			AT3G63490	RPL1	-2.06407	0	0
AT1G74110	CYP78A10	3.1231	5.04e-10	1.04e-09			AT4G39040	AT4G39040	-2.06361	0	0
AT5G05250	AT5G05250	3.12165	2.4e-272	3.44e-271			AT4G15300	CYP702A2	-2.06296	4.73e-15	1.12e-14
AT1G23750	AT1G23750	3.11694	0	0			AT1G70850	MLP34	-2.06212	0	0
AT5G26090	AT5G26090	3.11514	1.82e-06	3.3e-06			AT1G56242	AT1G56242	-2.06189	1.4e-06	2.54e-06
AT4G24010	CSLG1	3.11362	3.19e-12	6.99e-12			AT2G32200	AT2G32200	-2.06153	2.85e-45	1.11e-44
AT4G02160	AT4G02160	3.11161	8.71e-08	1.66e-07			AT1G64720	CP5	-2.06061	0	0
AT5G62848	MIR420	3.11127	3.17e-06	5.67e-06			AT1G05340	AT1G05340	-2.06054	3.39e-236	4.22e-235
AT3G49380	iqd15	3.1112	8.32e-53	3.51e-52			AT2G40955	AT2G40955	-2.06025	5.89e-09	1.17e-08
AT5G04120	IPSP	3.11115	4.81e-27	1.45e-26			AT3G61430	PIP1-1	-2.05654	0	0
AT1G59790	AT1G59790	3.11094	1.5e-07	2.82e-07			AT1G03680	ATHM1	-2.05624	0	0
AT3G02550	LBD41	3.10946	0	0			AT1G18210	CML27	-2.05553	0	0
AT5G17490	RGL3	3.10941	2.98e-200	3.24e-199			AT4G25910	NIFU3	-2.05489	0	0
AT4G31640	REM5	3.1063	2.06e-21	5.61e-21			AT2G32660	AtRLP22	-2.05478	1.72e-41	6.37e-41
AT4G11910	SGR2	3.10403	2.22e-116	1.57e-115			AT4G27280	AT4G27280	-2.05365	0	0
AT4G17550	AT4G17550	3.10288	0	0			AT2G34770	FAH1	-2.05332	0	0
AT5G52620	AT5G52620	3.10185	2e-08	3.9e-08			AT1G72180	AT1G72180	-2.05264	0	0
AT5G55420	AT5G55420	3.1011	1.26e-06	2.29e-06			AT1G29690	CAD1	-2.05125	4.79e-254	6.35e-253
AT1G62620	AT1G62620	3.09546	5.98e-42	2.23e-41			AT3G53460	CP29A	-2.05123	0	0
AT4G26420	GAMT1	3.09543	4.32e-06	7.67e-06			AT5G18770	AT5G18770	-2.05099	1.27e-49	5.19e-49
AT5G57550	XTH25	3.09419	0	0			AT5G26620	AT5G26620	-2.05097	0.000134057	0.000221618
AT5G65530	AT5G65530	3.094	0	0			AT1G20450	ERD10	-2.05083	0	0
AT4G36880	CP1	3.09308	0	0			AT3G51400	AT3G51400	-2.05046	2.52e-57	1.11e-56
AT4G28390	AAC3	3.09249	0	0			AT1G10470	ARR4	-2.05031	0	0
AT4G32290	AT4G32290	3.09228	0	0			AT1G66500	PCFS1	-2.05013	2.27e-142	1.86e-141
AT4G07960	CSLC12	3.09079	1.63e-146	1.36e-145			AT1G01790	KEA1	-2.04952	0	0
AT1G09080	MED37B	3.09028	5.42e-81	2.98e-80			AT1G65790	SD17	-2.04843	6.24e-19	1.62e-18
AT2G41810	AT2G41810	3.09027	1.59e-13	3.61e-13			AT3G57180	BPG2	-2.04815	7.89e-200	8.56e-199
AT1G10540	NAT8	3.09019	2.61e-33	8.67e-33			AT1G27770	ACA1	-2.04785	0	0
AT5G14450	AT5G14450	3.08919	0	0			AT2G11150	AT2G11150	-2.04572	2.57e-08	4.99e-08
AT1G12670	AT1G12670	3.08917	3.05e-06	5.47e-06			AT5G49270	COBL9	-2.04549	1.51e-35	5.15e-35
AT4G14390	AT4G14390	3.08832	7.65e-69	3.77e-68			AT5G66650	AT5G66650	-2.04538	0	0
AT2G19440	AT2G19440	3.08586	1.43e-25	4.19e-25			AT2G33830	AT2G33830	-2.04465	0	0
AT1G21740	AT1G21740	3.08453	0	0			AT5G06900	CYP93D1	-2.04424	0.00226182	0.0034563
AT1G14260	AT1G14260	3.08452	1.63e-39	5.88e-39			AT5G40330	MYB23	-2.04342	9.81e-25	2.84e-24
AT1G63020	NRPD1	3.08288	0	0			AT3G27850	RPL12C	-2.04152	4.06e-155	3.54e-154
AT2G29460	GSTU4	3.08275	7.4e-270	1.05e-268			AT4G10465	AT4G10465	-2.04117	0.0023167	0.00353777
AT1G78520	AT1G78520	3.08261	2.71e-31	8.74e-31			AT5G09820	PAP7	-2.04023	5.13e-170	4.83e-169
AT5G66170	STR18	3.07738	0	0			AT5G08410	FTRA2	-2.04015	0	0
AT3G60870	AHL18	3.07712	7.61e-22	2.09e-21			AT4G15400	AT4G15400	-2.04009	1.81e-25	5.32e-25
AT5G16980	AT5G16980	3.07395	0	0			AT1G18390	AT1G18390	-2.03881	3.34e-252	4.4e-251
AT1G54160	NFYA5	3.07344	6.74e-307	1.09e-305			AT5G43230	AT5G43230	-2.0388	2.2e-10	4.58e-10
AT3G26742	AT3G26742	3.07193	1.16e-20	3.12e-20			AT2G30900	TBL43	-2.03848	0.00241578	0.00368433
AT3G27400	AT3G27400	3.06993	1.99e-241	2.53e-240			AT4G00880	AT4G00880	-2.03835	1.9e-284	2.84e-283
AT3G27440	UKL5	3.06941	2.69e-16	6.56e-16			AT1G78120	TPR12	-2.03819	3.56e-112	2.46e-111
AT5G44260	AT5G44260	3.06918	1.09e-229	1.33e-228			AT3G07490	CML3	-2.03769	2.11e-05	3.64e-05
AT1G24095	AT1G24095	3.06893	5.21e-128	3.95e-127			AT4G27600	NARA5	-2.03695	0	0
AT1G51190	PLT2	3.06893	6.2e-62	2.86e-61			AT4G28850	XTH26	-2.03665	1.05e-20	2.82e-20
AT4G10950	AT4G10950	3.06398	2.03e-06	3.66e-06			AT5G24920	GDU5	-2.0347	5.4e-25	1.57e-24
AT3G53590	AT3G53590	3.06305	5.9e-07	1.09e-06			AT5G28770	BZIP63	-2.03415	0	0
AT1G53930	AT1G53930	3.06018	4.85e-06	8.6e-06			AT4G25080	CHLM	-2.03402	0	0
AT2G24170	TMN10	3.05554	0	0			AT3G09240	AT3G09240	-2.03259	2.94e-11	6.28e-11
AT1G10385	EXO84A	3.05168	7.55e-16	1.82e-15			AT1G77210	STP14	-2.03182	0	0
AT2G16570	ASE1	3.05162	6.52e-228	7.88e-227			AT5G46110	TPT	-2.03164	0	0
AT3G41762	AT3G41762	3.04775	2.9e-49	1.18e-48			AT1G52920	GCR2	-2.02756	0.000475766	0.000760829
AT1G18250	ATLP-1	3.04774	1.53e-287	2.32e-286			AT5G24100	AT5G24100	-2.02672	4.32e-14	9.95e-14
AT3G45000	VPS24-2	3.04762	1.71e-08	3.34e-08			AT5G59580	UGT76E1	-2.02494	7.68e-14	1.76e-13
AT1G49938	AT1G49938	3.04489	4.02e-07	7.46e-07			AT3G26710	CCB1	-2.02473	0	0
AT1G67610	AT1G67610	3.04383	2.19e-10	4.56e-10			AT4G13440	AT4G13440	-2.02462	1.75e-08	3.43e-08
AT2G35160	SUVH5	3.04094	1.87e-176	1.82e-175			AT1G22190	RAP2-13	-2.02454	5.6e-271	7.97e-270
AT4G35070	AT4G35070	3.04032	8.69e-280	1.28e-278			AT4G16840	AT4G16840	-2.02258	1.53e-59	6.88e-59
AT3G17200	AT3G17200	3.03932	2.94e-06	5.28e-06			AT2G35650	CSLA7	-2.02241	2.34e-220	2.74e-219
AT4G23140	CRK6	3.03913	7.37e-28	2.26e-27			AT1G04420	AT1G04420	-2.02172	0	0
AT5G41710	AT5G41710	3.03815	1.15e-24	3.32e-24			AT1G17620	AT1G17620	-2.02091	1.26e-274	1.83e-273
AT1G63870	AT1G63870	3.03782	1.25e-18	3.22e-18			AT1G16960	AT1G16960	-2.02017	2.23e-135	1.76e-134
AT3G51570	AT3G51570	3.03756	9.13e-19	2.36e-18			AT3G54770	ARP1	-2.01806	7.06e-39	2.53e-38
AT1G65610	KOR2	3.03515	0	0			AT1G21910	ERF012	-2.01727	0	0
AT1G11420	ATDUF2	3.03489	0	0			AT1G13270	MAP1B	-2.01611	0	0
AT4G27200	AT4G27200	3.03087	1.94e-06	3.49e-06			AT2G21030	AT2G21030	-2.01585	0.00230953	0.00352742
AT5G63700	AT5G63700	3.02996	0	0			AT3G27160	GHS1	-2.01433	0	0
AT2G36695	AT2G36695	3.02847	6.09e-08	1.17e-07			AT2G01110	TATC	-2.0141	0	0
AT5G15500	AT5G15500	3.02669	7.64e-74	3.95e-73			AT3G19320	AT3G19320	-2.01325	4.37e-07	8.09e-07
AT3G21351	AT3G21351	3.02248	6.44e-159	5.7e-158			AT2G32780	UBP1	-2.01317	0.00127461	0.00198534
AT4G32540	YUC1	3.02235	9.78e-17	2.41e-16			AT2G23540	AT2G23540	-2.01205	1.91e-119	1.38e-118
AT2G39782	AT2G39782	3.02102	2.14e-06	3.85e-06			AT1G07560	AT1G07560	-2.01201	1.19e-48	4.81e-48
AT3G53250	AT3G53250	3.02097	7.63e-13	1.7e-12			AT2G14760	BHLH84	-2.01169	0.00184132	0.00283261
AT4G37895	AT4G37895	3.01883	3.07e-11	6.55e-11			AT2G31040	AT2G31040	-2.00955	0	0
AT5G25490	AT5G25490	3.0134	0	0			AT4G38225	AT4G38225	-2.00879	0	0
AT4G12960	GILT	3.01234	6.86e-06	1.21e-05			AT4G18220	AT4G18220	-2.00832	3.6e-77	1.92e-76
AT2G43660	AT2G43660	3.01039	3.37e-13	7.58e-13			AT3G22150	PCMP-E95	-2.00792	4.98e-281	7.35e-280
AT5G26930	GATA23	3.00914	6.59e-07	1.21e-06			AT2G25840	OVA4	-2.00745	1.56e-286	2.35e-285
AT4G33040	GRXC6	3.00508	1.85e-152	1.59e-151			AT4G16410	AT4G16410	-2.00733	3.4e-244	4.36e-243
AT1G78840	AT1G78840	3.00494	2.76e-11	5.9e-11			AT4G02130	GATL6	-2.00666	9.24e-180	9.17e-179
AT2G31420	AT2G31420	3.00334	2.27e-07	4.25e-07			AT3G23085	AT3G23085	-2.00648	2.17e-05	3.74e-05
AT1G60075	AT1G60075	3.00131	5.44e-06	9.64e-06			AT1G43140	AT1G43140	-2.00609	7.31e-06	1.29e-05
AT5G02390	AT5G02390	3.00055	2.42e-50	9.96e-50			AT1G34000	OHP2	-2.00573	0	0
AT3G13660	DIR22	2.99934	2.28e-11	4.88e-11			AT1G79040	PSBR	-2.00522	1.21e-142	9.98e-142
AT1G29980	AT1G29980	2.99837	0	0			AT1G51880	RHS6	-2.00402	4.19e-09	8.36e-09
AT1G26420	AT1G26420	2.99569	7.17e-42	2.67e-41			AT2G38600	AT2G38600	-2.00368	9.67e-06	1.69e-05
AT5G22930	AT5G22930	2.99423	1.42e-110	9.66e-110			AT3G18330	AT3G18330	-2.00237	0.00281686	0.00427666
AT1G02970	WEE1	2.99215	1.41e-120	1.03e-119			AT1G14790	RDR1	-2.00228	2.23e-46	8.76e-46
AT1G19840	AT1G19840	2.99035	1.83e-86	1.05e-85			AT5G19940	PAP8	-2.0014	0	0
AT5G61620	AT5G61620	2.9889	8.37e-11	1.76e-10			AT1G31050	BHLH111	-2.0013	9.35e-54	3.99e-53
AT4G15910	ATDI21	2.98565	1.1e-251	1.45e-250			AT5G20935	AT5G20935	-2.00015	7.97e-114	5.54e-113
AT2G24762	GDU4	2.98557	1.98e-146	1.65e-145			AT5G36925	AT5G36925	-1.99946	6.89e-26	2.04e-25
AT2G27300	NTL8	2.98366	6.88e-32	2.24e-31			AT1G59590	ZCF37	-1.99699	5.17e-162	4.65e-161
AT4G29548	AT4G29548	2.98228	1.75e-07	3.3e-07			AT1G75750	GASA1	-1.99656	0	0
AT3G04380	SUVR4	2.98224	3.75e-236	4.67e-235			AT4G02410	LECRK43	-1.99614	5.83e-252	7.68e-251
AT3G57020	SSL9	2.98024	0	0			AT2G43030	RPL3A	-1.99582	0	0
AT4G01900	GLB1	2.97926	0	0			AT3G28850	AT3G28850	-1.99346	9.95e-69	4.9e-68
AT1G26515	AT1G26515	2.97917	4.37e-06	7.77e-06			AT1G69840	HIR2	-1.99284	0	0
AT1G16760	AT1G16760	2.97838	9.67e-06	1.69e-05			AT1G35680	RPL21	-1.9923	0	0
AT3G03670	PER28	2.97739	6.98e-07	1.28e-06			AT2G28800	ALB3	-1.99162	0	0
AT4G35390	AHL25	2.97655	1.44e-100	9.15e-100			AT5G04770	CAT6	-1.99047	1.19e-63	5.59e-63
AT1G20070	AT1G20070	2.97627	3.62e-245	4.65e-244			AT5G35970	AT5G35970	-1.9901	0	0
AT1G59950	AT1G59950	2.97625	6.22e-09	1.23e-08			AT1G27740	BHLH54	-1.99001	2.59e-18	6.62e-18
AT4G09880	AT4G09880	2.97494	2.63e-06	4.71e-06			AT1G20440	COR47	-1.98842	0	0
AT1G78330	AT1G78330	2.97394	3.81e-08	7.34e-08			AT1G01570	AT1G01570	-1.98792	3.26e-27	9.84e-27
AT4G25750	ABCG4	2.97344	1.16e-59	5.24e-59			AT2G20260	PSAE2	-1.98693	3.21e-169	3.01e-168
AT3G13090	ABCC6	2.97253	2.25e-50	9.24e-50			AT1G09650	AT1G09650	-1.98629	2.62e-06	4.69e-06
AT5G21280	AT5G21280	2.97245	8.13e-84	4.57e-83			AT2G30170	AT2G30170	-1.98625	1.27e-301	2.01e-300
AT4G16740	TPS03	2.9724	1.52e-07	2.87e-07			AT5G38710	POX2	-1.98607	4.5e-90	2.64e-89
AT1G72260	THI2.1	2.96986	1.41e-06	2.55e-06			AT1G24430	AT1G24430	-1.98553	4.73e-38	1.68e-37
AT4G28680	TYRDC	2.96919	4.07e-43	1.54e-42			AT1G75960	AAE8	-1.98542	2.22e-65	1.06e-64
AT5G17980	AT5G17980	2.96895	2.62e-284	3.91e-283			AT5G58690	PLC5	-1.98504	1.15e-72	5.89e-72
AT1G13590	PSK1	2.96618	9.36e-122	6.86e-121			AT5G12880	AT5G12880	-1.98375	3.07e-37	1.08e-36
AT1G67290	AT1G67290	2.96451	5.43e-06	9.61e-06			AT5G53580	PLR1	-1.98264	0	0
AT5G66260	AT5G66260	2.96362	8.84e-06	1.55e-05			AT2G47910	CRR6	-1.98262	1.7e-201	1.86e-200
AT5G05770	WOX7	2.96172	2.27e-06	4.09e-06			AT5G30510	RPS1	-1.98166	0	0
AT5G02580	AT5G02580	2.96072	6.85e-100	4.33e-99			AT5G65220	RPL29	-1.98114	7.38e-175	7.15e-174
AT1G71770	PAB5	2.96024	2.99e-41	1.1e-40			AT1G55670	PSAG	-1.98079	0	0
AT3G04980	AT3G04980	2.95918	2.21e-171	2.1e-170			AT5G37770	CML24	-1.98045	0	0
AT1G16730	UP6	2.95847	3.05e-215	3.52e-214			AT4G33290	AT4G33290	-1.98035	0.00295377	0.00447678
AT1G26770	EXPA10	2.95715	0	0			AT5G57770	AT5G57770	-1.97963	2.8e-20	7.49e-20
AT3G03450	RGL2	2.95706	3.94e-78	2.11e-77			AT3G24140	FAMA	-1.97956	0	0
AT3G43270	PME32	2.95437	0	0			AT2G31070	TCP10	-1.97938	5.71e-191	5.96e-190
AT3G12730	AT3G12730	2.95404	0	0			AT5G65690	PCK2	-1.97834	5.31e-72	2.69e-71
AT1G76930	ATEXT4	2.95328	0	0			AT1G79510	AT1G79510	-1.97815	6.67e-216	7.72e-215
AT4G21326	ATSBT3.12	2.95252	0	0			AT3G05490	RALFL22	-1.97785	1.2e-274	1.73e-273
AT2G34340	AT2G34340	2.95185	1.06e-175	1.03e-174			AT1G64510	RPS6	-1.97755	0	0
AT3G17760	GAD5	2.95002	3.07e-07	5.72e-07			AT2G33855	AT2G33855	-1.97743	2.25e-231	2.76e-230
AT1G06980	AT1G06980	2.9467	1.53e-77	8.15e-77			AT3G48235	AT3G48235	-1.97661	0.00318929	0.00481928
AT3G57460	AT3G57460	2.94217	7.9e-36	2.72e-35			AT3G04450	AT3G04450	-1.9753	6.41e-109	4.31e-108
AT5G24600	AT5G24600	2.94119	3.16e-122	2.32e-121			AT1G57850	AT1G57850	-1.97483	0.00287354	0.00435907
AT3G06640	AT3G06640	2.94073	7.09e-41	2.6e-40			AT3G01290	HIR3	-1.97481	0	0
AT4G23200	CRK12	2.94044	5.41e-47	2.14e-46			AT2G17880	AT2G17880	-1.97425	5.36e-101	3.43e-100
AT5G50790	SWEET10	2.93861	3.16e-33	1.05e-32			AT3G21070	NADK1	-1.97373	0	0
AT4G28700	AMT1-4	2.93822	2.75e-16	6.7e-16			AT2G06050	OPR3	-1.97321	0	0
AT5G56075	AT5G56075	2.93811	3.56e-06	6.35e-06			AT3G12345	AT3G12345	-1.97232	0	0
AT5G11870	AT5G11870	2.93684	9.4e-55	4.04e-54			AT5G37000	AT5G37000	-1.97215	2.56e-26	7.61e-26
AT5G19550	ASP2	2.93438	0	0			AT5G07280	EMS1	-1.97208	1.14e-39	4.14e-39
AT2G05640	AT2G05640	2.9343	4.29e-06	7.63e-06			AT5G04810	PPR4	-1.97134	0	0
AT2G27870	AT2G27870	2.93388	8.94e-06	1.57e-05			AT1G66100	AT1G66100	-1.97068	5.03e-19	1.31e-18
AT3G21030	AT3G21030	2.93294	8e-26	2.36e-25			AT1G33170	AT1G33170	-1.97049	9.41e-125	7.01e-124
AT2G18880	VIL3	2.93255	5.47e-09	1.09e-08			AT4G38970	FBA2	-1.97021	0	0
AT1G52343	AT1G52343	2.93069	3.34e-38	1.19e-37			AT1G59840	CCB4	-1.96874	6.22e-287	9.41e-286
AT2G38180	AT2G38180	2.92933	5.53e-192	5.81e-191			AT3G52840	BGAL2	-1.96801	0	0
AT1G62262	SLAH4	2.92851	1.8e-29	5.64e-29			AT1G47930	AT1G47930	-1.96754	0.00147191	0.00227977
AT1G74420	FUT3	2.92774	1.3e-54	5.59e-54			AT5G43380	TOPP7	-1.96641	1.78e-134	1.4e-133
AT3G13857	AT3G13857	2.92728	8.97e-06	1.57e-05			AT1G29930	LHCB1.3	-1.96573	1.05e-280	1.55e-279
AT3G21240	4CL2	2.92685	0	0			AT1G04360	ATL1	-1.9655	2.75e-34	9.26e-34
AT2G03130	AT2G03130	2.92411	1.28e-05	2.22e-05			AT3G56930	PAT04	-1.96411	6.45e-151	5.51e-150
AT1G27890	CAF1-4	2.92213	1.83e-12	4.03e-12			AT1G24577	AT1G24577	-1.96393	1.42e-15	3.41e-15
AT2G18570	UGT72D1	2.92139	1.05e-271	1.49e-270			AT1G18170	FKBP17-2	-1.96376	7.95e-296	1.24e-294
AT5G40040	RPP2E	2.92125	7.29e-13	1.62e-12			AT4G20130	PTAC14	-1.96362	0	0
AT4G22730	AT4G22730	2.9207	0	0			AT2G15090	KCS8	-1.96361	0	0
AT5G20670	AT5G20670	2.9201	3.17e-20	8.47e-20			AT5G34830	AT5G34830	-1.96347	0.000758409	0.00119779
AT1G74000	SSL11	2.92001	7.76e-69	3.82e-68			AT3G11430	GPAT5	-1.9632	2.4e-51	9.97e-51
AT2G40610	EXPA8	2.91956	2.34e-269	3.3e-268			AT3G01220	ATHB-20	-1.96204	1.7e-48	6.83e-48
AT4G25160	PUB35	2.91872	8.81e-64	4.14e-63			AT3G45650	NPF2.7	-1.96191	2.08e-218	2.43e-217
AT2G18150	PER15	2.91525	9.04e-272	1.29e-270			AT5G34790	AT5G34790	-1.96184	2.32e-24	6.67e-24
AT5G43240	AT5G43240	2.91359	5.77e-10	1.18e-09			AT3G45680	NPF2.3	-1.96154	1.44e-14	3.35e-14
AT3G60650	AT3G60650	2.91355	8.53e-30	2.69e-29			AT1G70740	AT1G70740	-1.9612	8.08e-246	1.04e-244
AT3G05400	SUGTL5	2.91341	2.3e-165	2.1e-164			AT1G47370	AT1G47370	-1.96111	5.6e-05	9.45e-05
AT1G57820	ORTH2	2.91169	0	0			AT1G21140	AT1G21140	-1.95836	2.18e-23	6.16e-23
AT3G54320	WRI1	2.9105	8.3e-271	1.18e-269			AT2G16750	AT2G16750	-1.95832	2.35e-68	1.15e-67
AT2G39700	EXPA4	2.90691	0	0			AT5G52970	AT5G52970	-1.95832	0	0
AT1G21850	sks8	2.90525	1.35e-05	2.34e-05			AT4G38420	sks9	-1.95757	0	0
AT4G22770	AHL2	2.90371	5.23e-303	8.33e-302			AT3G07650	COL9	-1.95642	0	0
AT2G16586	AT2G16586	2.90289	1.07e-30	3.43e-30			AT5G15360	AT5G15360	-1.95609	8.07e-07	1.48e-06
AT2G39350	ABCG1	2.9024	0	0			AT1G50320	ATHX	-1.95598	0	0
AT2G34185	AT2G34185	2.90222	1.75e-43	6.66e-43			AT5G27390	AT5G27390	-1.95452	1.84e-290	2.81e-289
AT1G51040	PI4KA2	2.9016	1.51e-05	2.61e-05			AT1G61820	BGLU46	-1.95286	1.42e-307	2.31e-306
AT3G04510	LSH2	2.89947	5.25e-10	1.08e-09			AT1G05990	CML7	-1.95235	0.000622842	0.00098855
AT1G01225	AT1G01225	2.89789	9.11e-87	5.23e-86			AT3G18200	AT3G18200	-1.95092	2.22e-33	7.37e-33
AT5G44270	AT5G44270	2.89444	7.07e-06	1.24e-05			AT4G19100	PAM68	-1.94935	1.5e-224	1.78e-223
AT1G76500	AHL29	2.89405	8.64e-110	5.85e-109			AT1G75350	RPL31	-1.94927	0	0
AT5G18080	SAUR24	2.89306	2.65e-28	8.18e-28			AT1G05810	ARA	-1.94878	1.93e-105	1.27e-104
AT2G21780	AT2G21780	2.89269	7.6e-32	2.47e-31			AT1G74460	AT1G74460	-1.94821	5.38e-90	3.16e-89
AT2G25270	AT2G25270	2.89033	0	0			AT2G30570	PSBW	-1.94812	0	0
AT5G45990	AT5G45990	2.88913	2.32e-65	1.11e-64			AT5G05740	EGY2	-1.94702	0	0
AT2G39410	AT2G39410	2.88829	7.09e-167	6.55e-166			AT1G11050	AT1G11050	-1.94696	0	0
AT5G15830	AtbZIP3	2.88813	1.29e-98	8.07e-98			AT2G40020	AT2G40020	-1.94679	7.08e-61	3.24e-60
AT5G03090	AT5G03090	2.88664	8.02e-12	1.74e-11			AT4G32260	AT4G32260	-1.94509	0	0
AT1G26260	BHLH76	2.88517	1.16e-243	1.48e-242			AT3G27830	RPL12A	-1.94452	2.64e-161	2.36e-160
AT5G25380	CYCA2	2.88507	5.2e-54	2.22e-53			AT3G12780	PGK1	-1.94448	0	0
AT4G34330	AT4G34330	2.88484	1.7e-05	2.95e-05			AT1G23840	AT1G23840	-1.94426	3.52e-15	8.34e-15
AT4G03960	AT4G03960	2.88359	0	0			AT5G48070	XTH20	-1.94424	4.84e-61	2.21e-60
AT2G28790	AT2G28790	2.88308	1.15e-290	1.76e-289			AT1G18485	PCMP-H8	-1.94424	3.62e-193	3.82e-192
AT3G08870	LECRK61	2.88296	1.19e-33	3.96e-33			AT2G03420	AT2G03420	-1.94336	1.11e-198	1.2e-197
AT1G11510	AT1G11510	2.88219	4.97e-06	8.81e-06			AT4G33590	AT4G33590	-1.94331	0.00101396	0.0015887
AT4G38340	NLP3	2.87703	1.16e-28	3.6e-28			AT3G52520	AT3G52520	-1.94311	3.44e-32	1.12e-31
AT5G13420	AT5G13420	2.87429	0	0			AT1G30730	AT1G30730	-1.94306	6.04e-171	5.73e-170
AT2G36270	ABI5	2.87429	8.06e-141	6.57e-140			AT4G26830	AT4G26830	-1.9429	1.61e-24	4.65e-24
AT5G10090	TPR13	2.87391	7.25e-06	1.28e-05			AT1G07320	RPL4	-1.94276	0	0
AT3G17180	SCPL33	2.87363	1.65e-06	2.99e-06			AT5G17850	CCX2	-1.94145	4.82e-252	6.35e-251
AT1G13680	AT1G13680	2.87256	7.93e-12	1.72e-11			AT1G12080	AT1G12080	-1.94117	2.31e-76	1.22e-75
AT2G36724	AT2G36724	2.87161	1.33e-05	2.31e-05			AT3G55880	SUE4	-1.94099	2.69e-171	2.55e-170
AT4G31330	AT4G31330	2.87123	1.23e-110	8.34e-110			AT1G51830	AT1G51830	-1.94063	5.19e-163	4.69e-162
AT3G53190	AT3G53190	2.86952	0	0			AT2G14080	AT2G14080	-1.94026	0	0
AT2G41290	SSL2	2.86765	8.56e-62	3.94e-61			AT5G48220	AT5G48220	-1.93985	1.15e-236	1.43e-235
AT4G22880	LDOX	2.86732	2.53e-24	7.28e-24			AT5G62680	NPF2.11	-1.93974	0	0
AT2G38520	AT2G38520	2.86582	1.11e-07	2.1e-07			AT4G28025	AT4G28025	-1.93972	0	0
AT1G64625	BHLH157	2.86478	1.16e-32	3.82e-32			AT2G40460	NPF5.1	-1.93953	8.25e-62	3.8e-61
AT5G47130	AT5G47130	2.86474	1.04e-21	2.86e-21			AT1G78990	AT1G78990	-1.93895	2.3e-34	7.75e-34
AT3G52770	ZPR3	2.86457	2.02e-101	1.29e-100			AT5G51010	AT5G51010	-1.93894	0	0
AT1G32870	NAC13	2.86419	0	0			AT4G28460	AT4G28460	-1.93849	2.57e-06	4.62e-06
AT5G61160	ACT	2.86392	5.08e-129	3.87e-128			AT4G19645	AT4G19645	-1.93785	2.31e-36	8.02e-36
AT2G39415	AT2G39415	2.86301	1.68e-05	2.91e-05			AT3G63190	RRF	-1.93727	0	0
AT1G02800	CEL2	2.86297	1.69e-47	6.69e-47			AT5G16140	CRS2B	-1.93705	6.39e-169	5.97e-168
AT5G03150	JKD	2.86273	0	0			AT1G53970	AT1G53970	-1.93679	0.00237592	0.00362516
AT3G11480	BSMT1	2.8615	1.1e-05	1.92e-05			AT2G34430	LHB1B1	-1.93647	3.23e-151	2.77e-150
AT5G45850	AT5G45850	2.85913	7.88e-14	1.8e-13			AT5G56200	AT5G56200	-1.93476	1.58e-05	2.74e-05
AT1G11785	AT1G11785	2.85626	2.1e-10	4.37e-10			AT1G73750	AT1G73750	-1.93456	3.23e-159	2.86e-158
AT1G55265	AT1G55265	2.8545	6.74e-166	6.19e-165			AT5G58720	AT5G58720	-1.93432	0	0
AT5G18690	AGP25	2.84494	1.34e-112	9.26e-112			AT2G25680	MOT1	-1.93429	5.14e-17	1.28e-16
AT4G31970	CYP82C2	2.84281	1.49e-05	2.58e-05			AT5G54148	AT5G54148	-1.93418	3.74e-13	8.4e-13
AT3G12450	AT3G12450	2.84236	1.82e-05	3.15e-05			AT5G16830	SYP21	-1.93307	0	0
AT5G45095	AT5G45095	2.83797	1.25e-24	3.6e-24			AT2G32130	AT2G32130	-1.93302	0.00113245	0.00176947
AT3G11160	AT3G11160	2.83772	7.95e-08	1.52e-07			AT3G26620	LBD23	-1.93198	0.003984	0.00598039
AT4G32205	AT4G32205	2.83706	2.52e-08	4.89e-08			AT2G28605	PPD2	-1.93139	1.91e-153	1.65e-152
AT1G33740	AT1G33740	2.83594	1.95e-05	3.36e-05			AT4G30440	GAE1	-1.93112	0	0
AT3G54520	AT3G54520	2.83514	9.94e-09	1.96e-08			AT5G17590	AT5G17590	-1.93065	0.00011725	0.000194601
AT1G29050	TBL38	2.83425	0	0			AT4G20760	AT4G20760	-1.93055	2.17e-196	2.32e-195
AT3G15310	AT3G15310	2.83398	8.96e-06	1.57e-05			AT5G49340	TBL4	-1.93016	3.12e-06	5.58e-06
AT5G57735	TASIR-ARF	2.83229	1.02e-06	1.85e-06			AT3G61260	AT3G61260	-1.93013	0	0
AT4G28280	LLG3	2.83058	1.46e-08	2.87e-08			AT4G29060	emb2726	-1.92877	0	0
AT3G29590	5MAT	2.82932	4.6e-11	9.75e-11			AT3G59750	LECRK58	-1.9284	8.94e-20	2.36e-19
AT1G79460	GA2	2.82856	0	0			AT1G64150	AT1G64150	-1.9276	1.74e-250	2.28e-249
AT3G18750	WNK6	2.82798	0	0			AT5G35220	EGY1	-1.92678	0	0
AT5G20710	BGAL7	2.82688	3.24e-27	9.78e-27			AT2G43900	5PTASE12	-1.92517	0	0
AT1G59660	NUP98B	2.82673	0	0			AT4G37920	AT4G37920	-1.92443	0	0
AT5G40382	AT5G40382	2.82641	4.43e-07	8.19e-07			AT3G62030	CYP20-3	-1.92328	0	0
AT4G22050	AT4G22050	2.82519	2.55e-05	4.38e-05			AT4G01525	SADHU5-1	-1.92178	1.62e-09	3.28e-09
AT4G04500	CRK37	2.82503	3.5e-06	6.24e-06			AT1G58290	HEMA1	-1.9217	0	0
AT1G06330	AT1G06330	2.82276	4.48e-10	9.23e-10			AT4G12690	AT4G12690	-1.92162	6.15e-65	2.92e-64
AT4G21500	AT4G21500	2.81928	2.73e-80	1.49e-79			AT4G02270	RHS13	-1.92095	4.05e-64	1.91e-63
AT3G46660	UGT76E12	2.81918	1.27e-05	2.21e-05			AT4G02200	DI19-5	-1.92015	1.64e-298	2.57e-297
AT3G56220	AT3G56220	2.81877	4.75e-61	2.17e-60			AT2G13680	CALS5	-1.92009	0.000371291	0.000597225
AT1G66320	AT1G66320	2.81775	1.93e-05	3.32e-05			AT5G21170	KINB1	-1.91903	0	0
AT1G05310	PME8	2.81733	1.34e-225	1.61e-224			AT3G24060	AT3G24060	-1.91773	0.00311824	0.00471663
AT5G38250	AT5G38250	2.81731	3.3e-06	5.9e-06			AT1G49500	AT1G49500	-1.91697	0	0
AT2G36750	UGT73C1	2.81671	7.02e-13	1.57e-12			AT4G24930	AT4G24930	-1.91686	2.16e-261	2.95e-260
AT3G48230	AT3G48230	2.81661	8.7e-06	1.53e-05			AT3G18500	CCR4-3	-1.9157	5.51e-268	7.74e-267
AT5G20635	GG3	2.81625	3.67e-125	2.74e-124			AT2G23760	BLH4	-1.91496	2.39e-304	3.81e-303
AT4G05030	AT4G05030	2.81509	4.73e-07	8.75e-07			AT4G04408	AT4G04408	-1.91487	0.00438006	0.0065565
AT5G06720	PER53	2.81365	1.57e-99	9.93e-99			AT4G01130	AT4G01130	-1.91486	9.41e-210	1.06e-208
AT3G50440	ATMES10	2.81189	0	0			AT5G42010	AT5G42010	-1.91466	4.1e-43	1.55e-42
AT5G18020	SAUR20	2.81149	4.39e-26	1.3e-25			AT2G01880	PAP7	-1.91367	7.02e-38	2.49e-37
AT1G54200	AT1G54200	2.8076	3.23e-77	1.72e-76			AT4G04640	ATPC1	-1.91283	0	0
AT5G18050	SAUR22	2.80664	1.52e-13	3.44e-13			AT5G18490	AT5G18490	-1.91262	0	0
AT2G30760	AT2G30760	2.80509	1.02e-05	1.78e-05			AT3G46690	UGT76E4	-1.91231	1.34e-60	6.08e-60
AT1G78370	GSTU20	2.80436	0	0			AT4G35900	FD	-1.91173	3.04e-24	8.74e-24
AT3G28899	AT3G28899	2.80427	4.21e-08	8.1e-08			AT1G51913	AT1G51913	-1.91109	0.00433989	0.00649887
AT2G22170	AT2G22170	2.80418	0	0			AT2G21960	AT2G21960	-1.91069	0	0
AT1G07500	AT1G07500	2.80353	3.43e-21	9.3e-21			AT1G16150	WAKL4	-1.90991	0.00429139	0.00642836
AT4G13195	CLE44	2.80281	1.76e-88	1.02e-87			AT3G02510	AT3G02510	-1.90948	6.22e-75	3.24e-74
AT5G55680	AT5G55680	2.80272	3.95e-17	9.83e-17			AT3G55950	CCR3	-1.90879	9.2e-112	6.32e-111
AT1G63100	SCL28	2.80266	4.83e-188	4.98e-187			AT2G15070	AT2G15070	-1.90875	0.000248577	0.000404225
AT5G01870	LTP10	2.79991	0	0			AT5G18470	AT5G18470	-1.90875	1.29e-228	1.57e-227
AT1G09812	AT1G09812	2.79922	5.2e-33	1.72e-32			AT2G36410	AT2G36410	-1.90856	0	0
AT4G24204	AT4G24204	2.7991	3.04e-05	5.2e-05			AT3G13750	BGAL1	-1.90792	0	0
AT2G45510	CYP704A2	2.7984	0	0			AT3G22961	AT3G22961	-1.90776	2.65e-18	6.78e-18
AT1G02850	BGLU11	2.7973	0	0			AT4G33470	HDA14	-1.90766	0	0
AT5G15940	AT5G15940	2.79593	3.14e-42	1.17e-41			AT2G33800	RPS5	-1.90715	0	0
AT5G42840	AT5G42840	2.79472	3.9e-39	1.4e-38			AT3G45660	NPF2.6	-1.90603	3.98e-14	9.18e-14
AT1G69440	AGO7	2.79329	8.08e-158	7.12e-157			AT5G48790	AT5G48790	-1.90563	0	0
AT1G25422	AT1G25422	2.79313	2.6e-25	7.59e-25			AT3G04320	AT3G04320	-1.90426	4.53e-31	1.45e-30
AT1G27120	B3GALT17	2.7928	7.86e-201	8.6e-200			AT3G18560	AT3G18560	-1.90406	2.13e-86	1.22e-85
AT1G23140	AT1G23140	2.79266	5.66e-194	6.01e-193			AT2G04700	FTRC	-1.90384	0	0
AT1G01060	LHY	2.79236	7.96e-18	2.01e-17			AT5G37990	AT5G37990	-1.90255	1.16e-90	6.84e-90
AT1G65481	AT1G65481	2.79185	3.75e-10	7.75e-10			AT2G32880	AT2G32880	-1.90241	3.04e-281	4.49e-280
AT1G04580	AAO4	2.79018	1.78e-05	3.07e-05			AT5G28500	RAF1	-1.90238	0	0
AT4G37390	YDK1	2.78942	3.28e-255	4.37e-254			AT1G22230	AT1G22230	-1.90195	1.87e-30	5.96e-30
AT3G05980	AT3G05980	2.78896	3.62e-115	2.54e-114			AT3G51325	AT3G51325	-1.90133	6.66e-08	1.27e-07
AT3G03530	NPC4	2.78888	7.53e-103	4.88e-102			AT3G19200	AT3G19200	-1.90132	1.79e-33	5.95e-33
AT1G31990	AT1G31990	2.78686	8.15e-09	1.61e-08			AT1G75020	LPAT4	-1.90112	9.28e-175	8.97e-174
AT3G61910	NAC066	2.78657	2.33e-05	4.01e-05			AT1G23850	AT1G23850	-1.90098	1.41e-57	6.22e-57
AT4G13690	AT4G13690	2.78648	1.83e-65	8.73e-65			AT1G18750	AGL65	-1.9	1.13e-43	4.3e-43
AT3G14300	PME26	2.78642	2.15e-05	3.7e-05			AT1G45474	LHCA5	-1.89966	0	0
AT3G53230	CDC48D	2.78503	0	0			AT4G18740	AT4G18740	-1.89943	7.24e-133	5.64e-132
AT1G08180	SMR2	2.78472	3.3e-109	2.22e-108			AT2G03440	NRP1	-1.89932	0	0
AT1G19410	AT1G19410	2.78219	9.05e-10	1.85e-09			AT4G12800	PSAL	-1.89901	0	0
AT5G64780	AT5G64780	2.78103	1.45e-195	1.55e-194			AT5G51545	LPA2	-1.89861	9.67e-274	1.39e-272
AT3G09375	AT3G09375	2.7796	1.3e-05	2.26e-05			AT1G64380	ERF061	-1.89838	1.02e-119	7.43e-119
AT1G32570	AT1G32570	2.77572	4.7e-19	1.22e-18			AT1G22480	AT1G22480	-1.89833	0.00174981	0.00269625
AT3G07730	AT3G07730	2.77527	1.08e-130	8.32e-130			AT3G46780	PTAC16	-1.89781	0	0
AT5G54020	AT5G54020	2.77426	2.22e-45	8.64e-45			AT4G22710	CYP706A2	-1.89759	5.02e-215	5.79e-214
AT5G10510	AIL6	2.77315	0	0			AT5G51890	PER66	-1.89747	7.61e-175	7.36e-174
AT1G79400	CHX2	2.7721	2.78e-05	4.76e-05			AT3G22620	AT3G22620	-1.89721	1.39e-96	8.57e-96
AT2G19990	PR-1-LIKE	2.77154	7.58e-43	2.85e-42			AT4G17560	AT4G17560	-1.8961	0	0
AT1G05420	OFP12	2.77118	1.69e-27	5.13e-27			AT3G14050	RSH2	-1.89563	0	0
AT5G05180	AT5G05180	2.77096	0	0			AT1G70410	BCA4	-1.89485	0	0
AT3G10420	SPD1	2.77095	0	0			AT3G59200	AT3G59200	-1.89458	4.06e-06	7.23e-06
AT4G38210	EXPA20	2.76951	8.26e-149	6.98e-148			AT3G44020	AT3G44020	-1.89436	9.13e-112	6.27e-111
AT2G19660	AT2G19660	2.76567	1.19e-56	5.21e-56			AT1G74770	AT1G74770	-1.89418	1.06e-50	4.37e-50
AT4G00250	AT4G00250	2.76347	1.16e-17	2.92e-17			AT4G23450	AIRP1	-1.89416	1.24e-22	3.46e-22
AT3G18485	ILR2	2.7621	1.29e-18	3.32e-18			AT3G20680	AT3G20680	-1.89301	1.34e-221	1.58e-220
AT2G40435	AT2G40435	2.7614	6.38e-48	2.55e-47			AT1G51110	PAP12	-1.8928	0	0
AT3G60120	BGLU27	2.75622	1.03e-14	2.42e-14			AT1G48350	RPL18	-1.89236	0	0
AT3G12545	AT3G12545	2.75604	1.26e-05	2.19e-05			AT2G28970	AT2G28970	-1.89234	1.78e-38	6.36e-38
AT1G75590	AT1G75590	2.75486	3.63e-20	9.68e-20			AT1G14880	PCR1	-1.89168	2.91e-41	1.07e-40
AT4G23560	AtGH9B15	2.75341	6.87e-08	1.31e-07			AT1G01140	CIPK9	-1.8908	0	0
AT5G54060	A3G2XYLT	2.75278	1.27e-09	2.57e-09			AT2G35210	AGD10	-1.89075	1.3e-10	2.72e-10
AT1G64618	AT1G64618	2.75145	2.52e-05	4.32e-05			AT1G11180	SCAMP5	-1.88839	7.95e-163	7.18e-162
AT2G43960	AT2G43960	2.75132	1.91e-05	3.3e-05			AT1G63090	PP2A11	-1.88718	7.73e-226	9.28e-225
AT5G55470	NHX4	2.75105	1.76e-107	1.17e-106			AT4G23496	SP1L5	-1.88715	0.000107553	0.000178942
AT2G13900	AT2G13900	2.75091	6.22e-08	1.19e-07			AT1G18990	MYOB5	-1.88684	0.000386166	0.000620528
AT3G05790	LON4	2.7506	8.52e-19	2.2e-18			AT1G33340	AT1G33340	-1.88681	5e-38	1.77e-37
AT3G58930	AT3G58930	2.74968	5.56e-222	6.56e-221			AT1G78750	AT1G78750	-1.88676	5.99e-11	1.27e-10
AT5G39240	AT5G39240	2.74751	4.11e-94	2.49e-93			AT5G48980	AT5G48980	-1.88673	0.00429888	0.00643853
AT1G30170	AT1G30170	2.74489	2.84e-05	4.85e-05			AT5G14320	RPS13	-1.88622	0	0
AT1G15300	AT1G15300	2.74436	3.19e-170	3.01e-169			AT4G25700	BETA-OHASE 1	-1.8857	5.1e-170	4.81e-169
AT2G37290	AT2G37290	2.74355	3.22e-205	3.58e-204			AT1G52230	PSAH2	-1.88479	0	0
AT4G16820	PLA-I{beta]2	2.74053	1.56e-21	4.25e-21			AT3G55250	AT3G55250	-1.88455	0	0
AT1G20795	AT1G20795	2.74036	7.65e-07	1.4e-06			AT5G04080	AT5G04080	-1.8845	1.28e-183	1.29e-182
AT1G33730	CYP76C5	2.74013	4.08e-05	6.93e-05			AT5G34800	AT5G34800	-1.88334	2.83e-24	8.14e-24
AT5G65640	BHLH93	2.73954	0	0			AT4G31110	WAKL18	-1.88315	2.78e-76	1.47e-75
AT3G60647	AT3G60647	2.7394	8.8e-17	2.17e-16			AT2G41430	ERD15	-1.88261	0	0
AT1G66235	AT1G66235	2.73901	4.03e-05	6.85e-05			AT1G05250	PER1	-1.88244	1.12e-34	3.8e-34
AT5G65320	BHLH99	2.73896	5.58e-28	1.71e-27			AT5G39420	cdc2cAt	-1.88218	4.16e-06	7.39e-06
AT3G23637	DVL21	2.73895	2.01e-05	3.46e-05			AT5G67385	AT5G67385	-1.88181	0	0
AT2G28700	AGL46	2.73785	2.41e-10	5.01e-10			AT5G54190	PORA	-1.88124	3.38e-06	6.04e-06
AT3G13890	MYB26	2.73365	3.86e-05	6.56e-05			AT2G37700	AT2G37700	-1.88021	3.27e-13	7.35e-13
AT4G03270	CYCD6-1	2.73315	3.65e-66	1.75e-65			AT5G44050	AT5G44050	-1.88016	2.12e-26	6.31e-26
AT3G52270	AT3G52270	2.73249	1.97e-09	3.97e-09			AT3G47200	AT3G47200	-1.87997	1.29e-39	4.68e-39
AT5G15850	COL1	2.73109	8.26e-81	4.53e-80			AT2G31082	CLE7	-1.87959	0.00134022	0.00208349
AT4G02280	SUS3	2.72807	0	0			AT1G48390	AT1G48390	-1.87924	2.66e-08	5.16e-08
AT4G28560	RIC7	2.72749	1.74e-43	6.62e-43			AT4G25220	RHS15	-1.87904	5.79e-18	1.47e-17
AT4G24070	AT4G24070	2.72674	4.12e-05	6.99e-05			AT4G01800	SECA1	-1.87853	0	0
AT5G28020	CYSD2	2.72644	0	0			AT1G76070	AT1G76070	-1.87845	6.3e-67	3.05e-66
AT5G33395	AT5G33395	2.72458	4.83e-05	8.17e-05			AT4G31530	AT4G31530	-1.87814	0	0
AT1G28360	ERF12	2.72272	4.35e-82	2.41e-81			AT4G29905	AT4G29905	-1.87732	0	0
AT3G12520	SULTR4	2.72081	0	0			AT2G28340	GATA13	-1.87699	0.00422387	0.0063293
AT5G18910	AT5G18910	2.72018	3.31e-13	7.45e-13			AT1G51700	DOF1.7	-1.87635	5.28e-105	3.48e-104
AT1G70510	KNAT2	2.71947	2.73e-50	1.12e-49			AT2G03530	UPS2	-1.87635	8.93e-130	6.84e-129
AT1G76420	NAC031	2.71856	2.59e-10	5.39e-10			AT3G56230	AT3G56230	-1.87589	5.81e-13	1.3e-12
AT1G11620	AT1G11620	2.71755	3.12e-05	5.32e-05			AT3G26900	SKL1	-1.87577	0	0
AT5G13250	AT5G13250	2.71743	2.11e-68	1.04e-67			AT5G60142	AT5G60142	-1.87537	0.00014081	0.000232584
AT2G22660	GRDP1	2.71036	0	0			AT4G34830	MRL1	-1.87521	0	0
AT4G28950	ARAC7	2.70823	8.86e-90	5.19e-89			AT4G21830	MSRB7	-1.87437	2.04e-269	2.88e-268
AT1G49150	AT1G49150	2.70714	2.6e-07	4.86e-07			AT1G35580	CINV1	-1.87334	0	0
AT2G18193	AT2G18193	2.70407	0	0			AT4G08950	EXO	-1.87285	0	0
AT5G48090	ELP1	2.7038	1.16e-63	5.44e-63			AT4G10340	LHCB5	-1.87091	0	0
AT4G03292	AT4G03292	2.70295	9.61e-07	1.76e-06			AT5G44530	AT5G44530	-1.87028	7.37e-101	4.7e-100
AT5G02360	AT5G02360	2.70259	8.12e-93	4.88e-92			AT4G28750	PSAE1	-1.8699	1.22e-208	1.37e-207
AT5G43935	FLS6	2.70072	5.37e-05	9.07e-05			AT2G38170	CAX1	-1.86984	0	0
AT3G20083	CYP705A16	2.69844	1.03e-07	1.96e-07			AT1G01880	GEN1	-1.86983	2.29e-19	5.99e-19
AT4G19460	AT4G19460	2.69819	2.4e-55	1.04e-54			AT4G02530	AT4G02530	-1.86967	0	0
AT3G16490	IQD26	2.69571	2.66e-72	1.35e-71			AT1G33811	AT1G33811	-1.86873	4.43e-297	6.92e-296
AT4G09500	UGT79B7	2.69559	3.67e-114	2.56e-113			AT3G45290	MLO3	-1.86836	1.77e-100	1.12e-99
AT4G20450	AT4G20450	2.69492	1.67e-20	4.48e-20			AT1G21110	AT1G21110	-1.8682	4.43e-226	5.32e-225
AT5G24080	AT5G24080	2.69318	2.48e-10	5.15e-10			AT1G36622	AT1G36622	-1.86691	9.61e-14	2.19e-13
AT1G44800	AT1G44800	2.69101	0	0			AT5G02710	AT5G02710	-1.8667	7.66e-233	9.44e-232
AT1G12672	AT1G12672	2.69069	5.54e-05	9.35e-05			AT1G34580	STP5	-1.86641	6.48e-10	1.33e-09
AT1G75450	CKX5	2.69065	1.18e-218	1.37e-217			AT3G63370	OTP86	-1.86621	3.1e-111	2.12e-110
AT3G26330	CYP71B37	2.69011	1.76e-273	2.53e-272			AT1G72640	AT1G72640	-1.86569	0	0
AT2G32160	AT2G32160	2.68913	2.79e-85	1.59e-84			AT1G60095	JAL16	-1.86554	1.51e-20	4.07e-20
AT5G40155	AT5G40155	2.68813	5.3e-05	8.96e-05			AT5G18240	MYR1	-1.86541	2.55e-113	1.77e-112
AT1G30950	UFO	2.68727	1.02e-09	2.08e-09			AT2G28570	AT2G28570	-1.86456	2.87e-114	2e-113
AT3G03270	AT3G03270	2.68726	0	0			AT3G49790	AT3G49790	-1.86396	2.6e-254	3.44e-253
AT4G11500	AT4G11500	2.68655	8.01e-15	1.88e-14			AT3G50060	MYB77	-1.86365	2.58e-152	2.22e-151
AT1G67600	AT1G67600	2.68545	4.19e-97	2.6e-96			AT3G01770	GTE11	-1.86337	0	0
AT2G16260	GR-RBP1	2.68448	2.31e-06	4.15e-06			AT2G06520	PSBX	-1.86296	3.12e-211	3.55e-210
AT1G75580	AT1G75580	2.68375	1.91e-84	1.08e-83			AT5G49360	BXL1	-1.86194	0	0
AT5G23940	DCR	2.68327	0	0			AT5G47190	AT5G47190	-1.86177	0	0
AT1G79690	NUDT3	2.68154	0	0			AT3G55180	AT3G55180	-1.86099	0.00298607	0.00452448
AT3G48346	AT3G48346	2.6815	1.94e-07	3.65e-07			AT4G01150	CURT1A	-1.86099	0	0
AT1G74190	AtRLP15	2.68053	5.39e-05	9.11e-05			AT4G29730	MSI5	-1.86028	2.37e-26	7.05e-26
AT5G53840	AT5G53840	2.68042	2.44e-05	4.2e-05			AT5G11290	AT5G11290	-1.85871	1.38e-05	2.39e-05
AT1G57650	AT1G57650	2.67989	3.55e-05	6.04e-05			AT1G51920	AT1G51920	-1.85836	0.00557167	0.00827804
AT1G62180	2024-04-02	2.67934	0	0			AT5G18860	AT5G18860	-1.85735	1.22e-236	1.52e-235
AT5G18030	SAUR21	2.67895	2.34e-27	7.1e-27			AT4G09350	ndhT	-1.85689	3.61e-33	1.2e-32
AT2G41690	HSFB3	2.6787	6.91e-16	1.67e-15			AT2G03550	CXE7	-1.85676	2.39e-130	1.84e-129
AT2G34490	CYP710A2	2.67823	0	0			AT1G73530	AT1G73530	-1.8565	1.51e-205	1.68e-204
AT3G51860	CAX3	2.6779	0	0			AT1G76450	PPD3	-1.85587	0	0
AT5G09930	ABCF2	2.67677	1.52e-05	2.63e-05			AT2G32870	AT2G32870	-1.85583	0	0
AT3G20910	NFYA9	2.67501	0	0			AT1G53560	AT1G53560	-1.85497	8.61e-94	5.21e-93
AT4G15630	AT4G15630	2.6731	0	0			AT5G57170	AT5G57170	-1.85486	2.5e-92	1.5e-91
AT3G05550	AT3G05550	2.67225	5.2e-34	1.74e-33			AT1G70880	AT1G70880	-1.85471	9.27e-26	2.73e-25
AT2G46150	AT2G46150	2.67095	4.53e-120	3.28e-119			AT4G16870	AT4G16870	-1.85442	0	0
AT1G33030	AT1G33030	2.67035	2.4e-45	9.31e-45			AT4G04692	AT4G04692	-1.85373	0	0
AT1G16590	REV7	2.67	2.15e-119	1.56e-118			AT4G03175	AT4G03175	-1.85261	0.00578148	0.0085794
AT1G22210	TPPC	2.66954	6.67e-05	0.00011212			AT4G25190	QWRF7	-1.8519	7.78e-06	1.37e-05
AT5G24205	AT5G24205	2.66952	6.16e-50	2.52e-49			AT2G15880	PEX3	-1.85165	0	0
AT2G25000	WRKY60	2.66859	1.26e-229	1.54e-228			AT3G11385	AT3G11385	-1.85142	0.000339407	0.000547197
AT2G43745	AT2G43745	2.6684	4.59e-21	1.24e-20			AT5G20470	AT5G20470	-1.85034	3.22e-06	5.75e-06
AT4G31620	REM3	2.66793	2.64e-81	1.46e-80			AT1G55525	AT1G55525	-1.84978	2.45e-05	4.21e-05
AT4G23990	CSLG3	2.66226	4.82e-53	2.04e-52			AT5G34825	AT5G34825	-1.84973	0.000101823	0.000169574
AT1G33950	AT1G33950	2.66167	6.44e-05	0.000108354			AT4G37510	AT4G37510	-1.84893	0	0
AT1G68795	CLE12	2.66115	2.41e-58	1.07e-57			AT3G16220	AT3G16220	-1.84891	4.6e-208	5.17e-207
AT2G26310	FAP2	2.66052	2.76e-118	1.98e-117			AT1G25472	CPuORF54	-1.84822	0.000127527	0.000211144
AT3G21230	4CL4	2.65939	1.26e-285	1.9e-284			AT3G03710	PNP1	-1.84746	0	0
AT1G78030	AT1G78030	2.65884	4.16e-24	1.19e-23			AT4G27290	AT4G27290	-1.84745	1.43e-15	3.42e-15
AT4G30290	XTH19	2.65817	0	0			AT5G03940	FFC	-1.847	0	0
AT5G48350	AT5G48350	2.65754	5.86e-08	1.12e-07			AT1G70640	AT1G70640	-1.84614	0.000569099	0.000905675
AT4G24890	PAP24	2.65631	5.23e-36	1.8e-35			AT3G30764	AT3G30764	-1.8454	0.00502606	0.00748978
AT5G04000	AT5G04000	2.6536	9.38e-36	3.22e-35			AT3G04330	AT3G04330	-1.84446	5.18e-10	1.06e-09
AT5G52720	AT5G52720	2.65209	2.54e-10	5.28e-10			AT1G06690	AT1G06690	-1.8433	4.2e-236	5.23e-235
AT1G61550	AT1G61550	2.65198	8.01e-38	2.83e-37			AT4G13390	AT4G13390	-1.84233	5.2e-44	1.99e-43
AT3G14320	ATL61	2.65158	2.4e-06	4.31e-06			AT5G54710	AT5G54710	-1.84232	0	0
AT3G20260	AT3G20260	2.65123	0	0			AT2G19800	MIOX2	-1.84126	0	0
AT5G39865	AT5G39865	2.64866	2.32e-28	7.18e-28			AT4G23400	PIP1-5	-1.84087	0	0
AT1G60630	AT1G60630	2.64797	1.37e-305	2.2e-304			AT1G52660	AT1G52660	-1.8404	1.57e-10	3.29e-10
AT3G11210	CPRD49	2.64574	3.45e-302	5.48e-301			AT3G59780	AT3G59780	-1.83979	0	0
AT4G17920	ATL29	2.64512	1.07e-09	2.17e-09			AT2G47060	AT2G47060	-1.83962	0	0
AT4G39510	CYP96A12	2.64493	1.93e-91	1.14e-90			AT4G17780	AT4G17780	-1.83943	0.0034066	0.00513768
AT3G09730	AT3G09730	2.64432	3.1e-132	2.41e-131			AT1G55940	CYP708A1	-1.8389	2.33e-20	6.24e-20
AT1G23380	KNAT6	2.64397	2.47e-284	3.68e-283			AT5G27895	AT5G27895	-1.83849	3.82e-16	9.26e-16
AT2G04460	AT2G04460	2.64352	8.67e-44	3.31e-43			AT5G26280	AT5G26280	-1.83745	0	0
AT3G13960	GRF5	2.64186	0	0			AT5G48390	ZIP4	-1.83738	6.54e-06	1.15e-05
AT1G51480	AT1G51480	2.64099	1.34e-19	3.54e-19			AT4G27820	BGLU9	-1.83702	2.68e-249	3.5e-248
AT2G47010	AT2G47010	2.63943	1.15e-28	3.56e-28			AT3G16650	PRL2	-1.83607	2.07e-13	4.69e-13
AT4G31610	REM1	2.63864	8.81e-12	1.91e-11			AT5G44540	AT5G44540	-1.83555	0.00289166	0.00438485
AT3G04180	AT3G04180	2.63749	8.15e-05	0.000136525			AT5G06290	2-Cys Prx B	-1.83533	0	0
AT3G30120	AT3G30120	2.63622	5.08e-12	1.11e-11			AT4G13340	LRX3	-1.83517	0	0
AT4G25845	AT4G25845	2.63617	2.96e-05	5.06e-05			AT1G21120	AT1G21120	-1.83517	1.57e-79	8.5e-79
AT4G28530	anac074	2.63551	6.78e-37	2.37e-36			AT1G44160	AT1G44160	-1.83514	1.21e-24	3.49e-24
AT1G80330	GA3OX4	2.63435	8.97e-05	0.000149799			AT1G20810	FKBP18	-1.83438	3.15e-275	4.57e-274
AT2G23960	AT2G23960	2.63196	9.8e-17	2.41e-16			AT4G35770	STR15	-1.83337	1.38e-302	2.2e-301
AT3G56870	AT3G56870	2.63137	1.83e-144	1.52e-143			AT1G17340	SAC5	-1.83328	1.27e-288	1.93e-287
AT5G17160	AT5G17160	2.63011	1.45e-210	1.65e-209			AT3G11840	PUB24	-1.83326	2.19e-72	1.11e-71
AT2G45900	AT2G45900	2.62894	1.69e-123	1.25e-122			AT4G01310	RPL5	-1.83313	0	0
AT3G42670	CLSY1	2.62824	0	0			AT4G20360	TUFA	-1.83306	0	0
AT3G02310	2024-09-02	2.62809	3.17e-15	7.51e-15			AT4G25170	AT4G25170	-1.83242	0	0
AT1G28390	AT1G28390	2.62794	1.39e-234	1.72e-233			AT5G06690	WCRKC1	-1.83215	0	0
AT2G04040	DTX1	2.62774	0	0			AT4G16190	AT4G16190	-1.83066	0	0
AT5G14610	RH46	2.62462	0	0			AT5G52440	TATB	-1.83058	0	0
AT4G00870	BHLH14	2.6231	1.18e-10	2.47e-10			AT2G21530	AT2G21530	-1.82956	0	0
AT4G38850	SAUR15	2.62289	1.58e-25	4.63e-25			AT5G61380	APRR1	-1.8284	0	0
AT3G26820	AT3G26820	2.61927	9.62e-05	0.000160381			AT5G47230	ERF5	-1.82829	3.34e-125	2.5e-124
AT1G49700	AT1G49700	2.61922	2.82e-19	7.38e-19			AT1G21540	AEE9	-1.82795	6.7e-81	3.68e-80
AT4G34135	UGT73B2	2.61809	0	0			AT1G69790	AT1G69790	-1.82704	6.03e-22	1.66e-21
AT1G54010	GLL23	2.61744	0	0			AT1G32990	RPL11	-1.82704	0	0
AT2G30370	EPFL6	2.61642	6.61e-62	3.05e-61			AT2G04842	EMB2761	-1.82662	0	0
AT2G40100	LHCB4.3	2.6152	0	0			AT3G13405	MIR169A	-1.8266	4.37e-05	7.42e-05
AT4G27590	AT4G27590	2.61286	1.21e-30	3.85e-30			AT4G18370	DEGP5	-1.82642	2.31e-303	3.68e-302
AT3G17600	IAA31	2.61185	8.36e-14	1.91e-13			AT1G10360	GSTU18	-1.8261	1.55e-122	1.14e-121
AT2G31160	LSH3	2.61142	7.79e-71	3.91e-70			AT1G53210	AT1G53210	-1.82427	0	0
AT1G49830	AT1G49830	2.60994	3.33e-29	1.04e-28			AT1G76600	AT1G76600	-1.82424	0	0
AT1G66620	AT1G66620	2.60993	4.29e-80	2.34e-79			AT2G03410	AT2G03410	-1.82333	6.32e-26	1.87e-25
AT1G31320	LBD4	2.60873	6.74e-95	4.11e-94			AT2G27290	AT2G27290	-1.82282	0	0
AT4G36220	CYP84A1	2.60377	0	0			AT1G62480	AT1G62480	-1.82275	0	0
AT1G28660	AT1G28660	2.60103	1.78e-274	2.58e-273			AT1G68890	PHYLLO	-1.82245	0	0
AT2G32790	AT2G32790	2.60039	2.36e-13	5.32e-13			AT1G80480	PTAC17	-1.82169	0	0
AT3G28193	AT3G28193	2.5982	9.59e-05	0.00015992			AT5G18404	AT5G18404	-1.82124	0.000110689	0.000184026
AT1G74210	GDPD5	2.59812	0	0			AT5G19800	AT5G19800	-1.82008	3.63e-09	7.25e-09
AT4G30070	PDF3.2	2.59795	8.71e-05	0.00014559			AT1G17260	AHA10	-1.81989	1.03e-09	2.1e-09
AT1G67360	AT1G67360	2.59588	0	0			AT4G30210	ATR2	-1.81952	0	0
AT4G37420	AT4G37420	2.59503	4.59e-06	8.14e-06			AT1G66280	BGLU22	-1.819	0	0
AT4G37890	EDA40	2.59488	1.33e-135	1.05e-134			AT3G45920	AT3G45920	-1.81876	0.00126443	0.00197028
AT5G63530	ATFP3	2.59434	0	0			AT1G34520	AT1G34520	-1.81859	0.00025543	0.000414997
AT2G23180	CYP96A1	2.59329	3.93e-89	2.29e-88			AT5G58090	AT5G58090	-1.81851	0	0
AT1G63950	AT1G63950	2.59314	0.000113645	0.000188779			AT4G04420	AT4G04420	-1.81802	0.000784019	0.00123738
AT1G26240	AT1G26240	2.59225	2.65e-05	4.55e-05			AT5G14700	AT5G14700	-1.81799	2.07e-81	1.14e-80
AT5G46060	AT5G46060	2.59222	1.25e-27	3.81e-27			AT1G55490	CPN60B1	-1.81788	0	0
AT1G07430	AIP1	2.59147	1.59e-36	5.52e-36			AT5G13510	RPL10	-1.81732	7.11e-117	5.05e-116
AT3G14380	AT3G14380	2.591	8.9e-05	0.000148638			AT1G34330	AT1G34330	-1.81731	1.58e-10	3.3e-10
AT5G17800	AtMYB56	2.58989	5.24e-56	2.28e-55			AT2G05160	AT2G05160	-1.8173	5.89e-73	3.02e-72
AT1G19490	AT1G19490	2.589	4.67e-74	2.42e-73			AT5G39530	AT5G39530	-1.81711	6.09e-237	7.6e-236
AT1G73860	AT1G73860	2.58713	3.4e-63	1.59e-62			AT5G44770	AT5G44770	-1.81632	0.00602191	0.00892357
AT3G53450	LOG4	2.58595	1.09e-42	4.08e-42			AT3G08010	ATAB2	-1.81625	0	0
AT5G43030	AT5G43030	2.5853	2.75e-29	8.62e-29			AT1G55640	PRA1G1	-1.81578	0.00476366	0.00711119
AT4G12735	AT4G12735	2.58478	2.2e-56	9.6e-56			AT2G01620	SKIP28	-1.81565	9.04e-262	1.24e-260
AT5G43603	MIR166F	2.5842	0.000110295	0.000183392			AT2G38780	AT2G38780	-1.81513	1.26e-155	1.1e-154
AT2G26870	NPC2	2.58389	7.71e-296	1.2e-294			AT3G17800	AT3G17800	-1.81504	0	0
AT4G11650	OSM34	2.58262	0	0			AT5G41700	UBC8	-1.81439	0	0
AT4G24150	GRF8	2.58258	7.02e-56	3.05e-55			AT4G18390	TCP2	-1.81438	1.06e-190	1.1e-189
AT1G32240	KAN2	2.58221	1.62e-228	1.96e-227			AT3G15190	RPS20	-1.81431	0	0
AT1G21220	AT1G21220	2.58161	2.12e-15	5.04e-15			AT5G45113	AT5G45113	-1.81335	0.00408273	0.00612252
AT4G24026	AT4G24026	2.58119	2.89e-77	1.54e-76			AT1G68850	PER11	-1.81279	2.94e-60	1.34e-59
AT1G36180	ACC2	2.58083	0	0			AT3G24430	HCF101	-1.81271	0	0
AT3G05540	AT3G05540	2.58028	0.000102167	0.000170116			AT4G09650	ATPD	-1.81259	0	0
AT1G61930	AT1G61930	2.57949	3.74e-28	1.15e-27			AT3G49160	PKP4	-1.81229	4.56e-133	3.56e-132
AT2G25820	ERF042	2.57635	2.09e-05	3.6e-05			AT2G47360	AT2G47360	-1.81134	8.79e-13	1.95e-12
AT3G29370	AT3G29370	2.57601	5.97e-34	2e-33			AT1G32200	ATS1	-1.81131	0	0
AT5G43980	CRRSP56	2.57592	2.46e-40	8.99e-40			AT2G40008	AT2G40008	-1.81125	6.68e-06	1.18e-05
AT5G61730	ATATH11	2.57536	0.000129498	0.000214329			AT4G05330	AGD13	-1.8106	3.88e-188	4e-187
AT2G34880	JMJ15	2.57474	0.000112502	0.000186926			AT1G48450	AT1G48450	-1.81058	0	0
AT5G57920	ENODL10	2.5721	2.17e-17	5.44e-17			AT3G62720	XXT1	-1.81048	0	0
AT3G13900	ALA7	2.5718	2.54e-22	7.06e-22			AT1G32910	AT1G32910	-1.80992	6.35e-10	1.3e-09
AT5G58390	PER67	2.57107	0	0			AT3G55800	SBPASE	-1.80983	0	0
AT1G61700	NRPB10L	2.56974	0.000113832	0.000189078			AT2G01870	AT2G01870	-1.80971	1.28e-68	6.3e-68
AT2G01008	AT2G01008	2.56904	9.31e-49	3.76e-48			AT4G26288	AT4G26288	-1.80894	7.48e-57	3.29e-56
AT1G67645	AT1G67645	2.56846	6.57e-06	1.16e-05			AT5G03360	AT5G03360	-1.80765	9.48e-52	3.96e-51
AT1G59670	GSTU15	2.56645	2.35e-11	5.03e-11			AT5G63780	SHA1	-1.80705	4.09e-282	6.06e-281
AT3G29300	AT3G29300	2.56627	3.65e-09	7.29e-09			AT5G44585	AT5G44585	-1.80636	3.32e-33	1.1e-32
AT4G22130	SRF8	2.56562	0	0			AT2G37900	NPF5.6	-1.8055	0.000195843	0.000320459
AT5G03670	AT5G03670	2.5643	1.68e-150	1.43e-149			AT5G01920	STN8	-1.80394	2.22e-277	3.24e-276
AT2G27402	AT2G27402	2.56404	8.87e-59	3.97e-58			AT1G09932	AT1G09932	-1.80328	3.84e-94	2.33e-93
AT1G60060	AT1G60060	2.56135	2.01e-142	1.65e-141			AT3G46930	AT3G46930	-1.80317	2.54e-189	2.64e-188
AT2G17740	AT2G17740	2.56115	6.9e-14	1.58e-13			AT2G44370	AT2G44370	-1.80314	5.5e-32	1.79e-31
AT3G02980	MCC1	2.56064	4.45e-74	2.3e-73			AT3G48120	AT3G48120	-1.80264	9.19e-112	6.31e-111
AT5G24330	ATXR6	2.56032	5.57e-50	2.28e-49			AT5G59940	AT5G59940	-1.80248	2.04e-13	4.62e-13
AT5G10278	AT5G10278	2.55969	8.47e-52	3.54e-51			AT3G52430	PAD4	-1.80203	2.5e-113	1.74e-112
AT4G13990	AT4G13990	2.55877	9.82e-154	8.52e-153			AT1G04640	LIP2	-1.80202	4.75e-228	5.75e-227
AT1G63005	MIR399B	2.55812	3.33e-05	5.68e-05			AT5G39000	AT5G39000	-1.80089	1.87e-06	3.37e-06
AT4G34860	INVB	2.5571	0	0			AT1G34050	AT1G34050	-1.80066	0.000443345	0.000710358
AT3G22133	AT3G22133	2.5568	0.000135999	0.000224815			AT4G12050	AHL26	-1.79989	1.56e-33	5.19e-33
AT4G30110	HMA2	2.55557	2.21e-150	1.88e-149			AT2G36220	AT2G36220	-1.79908	2.49e-231	3.05e-230
AT4G12540	AT4G12540	2.55314	6.65e-33	2.19e-32			AT3G10660	CPK2	-1.79869	2.5e-40	9.14e-40
AT5G38565	AT5G38565	2.55296	7.82e-38	2.77e-37			AT2G48130	AT2G48130	-1.79738	1.07e-38	3.81e-38
AT1G32583	TDL1	2.55113	3.42e-104	2.23e-103			AT1G54790	AT1G54790	-1.79732	2.2e-10	4.57e-10
AT1G33700	AT1G33700	2.54946	0	0			AT1G18880	NPF2.9	-1.79661	3.67e-96	2.26e-95
AT2G47750	GH3.9	2.54941	6.13e-23	1.72e-22			AT3G51300	ARAC11	-1.79657	2.97e-07	5.53e-07
AT5G43530	AT5G43530	2.54924	3.91e-20	1.04e-19			AT4G39640	GGT1	-1.79638	7.4e-285	1.11e-283
AT5G18670	BAM9	2.54817	2.11e-269	2.98e-268			AT5G24060	AT5G24060	-1.79625	0	0
AT4G36350	PAP25	2.54776	7.03e-07	1.29e-06			AT2G45740	PEX11D	-1.79604	0	0
AT2G15128	AT2G15128	2.54713	2.93e-57	1.29e-56			AT5G14830	AT5G14830	-1.79603	1.34e-22	3.74e-22
AT5G28650	WRKY74	2.54703	2.28e-22	6.34e-22			AT1G22890	AT1G22890	-1.79571	1.32e-266	1.84e-265
AT5G10572	SNOR77	2.54496	4.7e-13	1.05e-12			AT2G21500	AT2G21500	-1.7951	3.29e-270	4.66e-269
AT5G15530	BCCP2	2.54322	0	0			AT1G76570	AT1G76570	-1.7949	5.03e-111	3.44e-110
AT1G73210	AT1G73210	2.54205	4.64e-124	3.44e-123			AT4G26370	AT4G26370	-1.79488	0	0
AT3G60520	AT3G60520	2.54193	1.95e-135	1.54e-134			AT2G18710	SCY1	-1.79446	0	0
AT1G74550	CYP98A9	2.54123	4.07e-21	1.1e-20			AT1G64200	VHA-E3	-1.79434	1.05e-99	6.61e-99
AT1G61110	NAC025	2.5396	4.21e-05	7.15e-05			AT4G15545	AT4G15545	-1.79422	0	0
AT1G14755	AT1G14755	2.53947	0.000111885	0.000185957			AT2G26420	PIP5K3	-1.7942	1.71e-14	3.97e-14
AT1G23970	AT1G23970	2.53873	0	0			AT1G13790	FDM4	-1.79407	3e-25	8.77e-25
AT4G23130	CRK5	2.53858	2.75e-45	1.07e-44			AT1G74950	TIFY10B	-1.79398	0	0
AT5G49410	AT5G49410	2.53823	1.83e-73	9.4e-73			AT1G30455	AT1G30455	-1.79329	0.00497326	0.00741272
AT2G39490	AT2G39490	2.5372	4.35e-06	7.72e-06			AT3G62850	AT3G62850	-1.792	0.0050527	0.00752908
AT4G36930	SPT	2.53686	0	0			AT5G24750	AT5G24750	-1.79161	2.05e-35	7e-35
AT1G09310	AT1G09310	2.53623	0	0			AT2G05940	AT2G05940	-1.7911	0	0
AT5G49120	AT5G49120	2.53575	9.81e-12	2.12e-11			AT4G24540	AGL24	-1.79083	4.66e-67	2.26e-66
AT2G07000	AT2G07000	2.53538	2.18e-06	3.92e-06			AT3G12775	AT3G12775	-1.79069	0.00349368	0.00526465
AT2G41340	NRPD5B	2.53449	1.44e-159	1.28e-158			AT2G21280	GC1	-1.79016	0	0
AT2G26160	AT2G26160	2.53357	0.000156169	0.000257282			AT4G35440	CLC-E	-1.79004	3.21e-272	4.59e-271
AT4G20420	AT4G20420	2.53282	1.02e-32	3.37e-32			AT2G42350	ATL40	-1.78999	2.41e-15	5.73e-15
AT1G31760	AT1G31760	2.53228	1.2e-124	8.95e-124			AT3G11280	AT3G11280	-1.78983	0	0
AT1G13750	PAP1	2.53205	2.76e-132	2.14e-131			AT4G14870	SECE1	-1.78979	1.45e-196	1.55e-195
AT4G20140	GSO1	2.53155	0	0			AT5G54720	AT5G54720	-1.78901	2.6e-71	1.31e-70
AT5G66110	HIPP27	2.53143	6.82e-36	2.35e-35			AT3G48590	NFYC1	-1.78886	1.76e-152	1.52e-151
AT5G66710	AT5G66710	2.5305	9.46e-14	2.16e-13			AT5G46390	CTPA1	-1.78814	0	0
AT1G30921	AT1G30921	2.53046	0.000146781	0.000242126			AT5G06850	AT5G06850	-1.78717	3.76e-148	3.17e-147
AT2G33175	AT2G33175	2.52987	2.98e-09	5.98e-09			AT3G29185	AT3G29185	-1.78694	0	0
AT1G19670	CLH1	2.52904	0	0			AT3G27884	AT3G27884	-1.78652	4.35e-20	1.16e-19
[truncated: 3,038 more rows]

## Sheet: val1 val2 fus3 vs WT
up							down
ID	name	log2Folc Change	p vaule	FDR			ID	name	log2Folc Change	p vaule	FDR
AT4G28520	CRC	10.6165	6.36038e-215	1.78945e-213			AT1G01140	CIPK9	-1.78985	0	0
AT1G60020	AT1G60020	10.5534	1.38193e-124	2.16776e-123			AT1G01470	LEA14	-1.83353	0	0
AT5G20750	AT5G20750	10.2662	1.56989e-119	2.35663e-118			AT1G01560	MPK11	-4.82584	4.67426e-160	9.47344e-159
AT5G35965	AT5G35965	9.79615	2.0654e-96	2.53596e-95			AT1G01720	NAC002	-2.01234	0	0
AT5G34851	AT5G34851	9.74583	1.37758e-152	2.65618e-151			AT1G01840	AT1G01840	-1.21224	0.000101676	0.000199966
AT4G27160	2S3	9.27812	1.589e-147	2.96126e-146			AT1G01880	GEN1	-1.05296	9.32798e-08	2.25612e-07
AT1G74140	AT1G74140	9.22624	1.26508e-120	1.91224e-119			AT1G02020	AT1G02020	-1.80163	1.42879e-70	1.36191e-69
AT1G53480	MRD1	9.08186	8.00155e-143	1.44686e-141			AT1G02110	AT1G02110	-1.03329	1.42205e-57	1.14275e-56
AT1G03106	AT1G03106	9.06975	0	0			AT1G02205	CER1	-2.35928	1.14008e-132	1.92825e-131
AT3G21370	BGLU19	8.91755	3.94441e-118	5.84734e-117			AT1G02230	NAC004	-1.71315	0.000338959	0.00063649
AT2G41260	M17	8.74323	1.35967e-105	1.8188e-104			AT1G02390	GPAT2	-1.55863	8.09813e-61	6.81749e-60
AT5G08695	AT5G08695	8.73605	4.54307e-96	5.56505e-95			AT1G02400	GA2OX6	-3.23026	0	0
AT2G27380	EPR1	8.65124	1.03144e-111	1.45252e-110			AT1G02620	AT1G02620	-3.21487	8.22161e-98	1.02535e-96
AT4G31900	PKR2	8.56829	5.50673e-130	9.05047e-129			AT1G02660	AT1G02660	-1.75374	0	0
AT4G35650	IDH3	8.53749	6.00001e-126	9.52034e-125			AT1G02670	AT1G02670	-1.7346	1.17788e-33	6.46513e-33
AT5G35660	AT5G35660	8.43827	5.97383e-95	7.24307e-94			AT1G02810	PME7	-1.10659	1.40432e-54	1.0823e-53
AT4G19690	IRT1	8.42464	3.95128e-89	4.55041e-88			AT1G03090	MCCA	-1.30651	0	0
AT5G43800	AT5G43800	8.42168	6.49353e-66	5.85268e-65			AT1G03340	AT1G03340	-3.17603	1.03588e-06	2.35644e-06
AT5G24130	AT5G24130	8.42089	1.02598e-122	1.5791e-121			AT1G03470	NET3A	-1.06701	5.57954e-58	4.50861e-57
AT1G04660	AT1G04660	8.37283	7.81269e-165	1.63014e-163			AT1G03600	PSB27-1	-1.35044	1.60317e-63	1.40103e-62
AT5G35796	AT5G35796	8.16031	2.40824e-60	2.00866e-59			AT1G03680	ATHM1	-1.35301	0	0
AT4G27140	2S1	8.03302	1.65028e-204	4.37483e-203			AT1G03730	AT1G03730	-1.6669	6.9246e-82	7.41941e-81
AT4G18900	AT4G18900	7.87415	1.24789e-124	1.95985e-123			AT1G03800	ERF10	-2.7243	2.43869e-07	5.75835e-07
AT3G31023	AT3G31023	7.8264	3.51155e-63	3.05046e-62			AT1G04050	SUVR1	-1.29611	3.86035e-20	1.52901e-19
AT4G33720	AT4G33720	7.78455	2.09456e-104	2.7749e-103			AT1G04420	AT1G04420	-1.15914	0	0
AT4G21370	PSEUDOSRKA	7.71816	1.89262e-79	1.98479e-78			AT1G04490	AT1G04490	-1.84633	3.23325e-45	2.17475e-44
AT1G52940	PAP5	7.68011	6.50866e-58	5.24804e-57			AT1G04640	LIP2	-1.2624	7.78623e-119	1.16482e-117
AT1G66570	SUC7	7.65013	8.56269e-57	6.78712e-56			AT1G05340	AT1G05340	-2.67188	0	0
AT1G16705	AT1G16705	7.54231	4.64301e-187	1.12277e-185			AT1G05540	AT1G05540	-1.92962	1.30641e-05	2.75753e-05
AT2G28490	AT2G28490	7.51325	1.2714e-89	1.47065e-88			AT1G05575	AT1G05575	-2.4695	1.69989e-188	4.15291e-187
AT1G17710	AT1G17710	7.51169	0	0			AT1G05675	UGT74E1	-3.41528	4.36449e-86	4.88021e-85
AT1G60570	AT1G60570	7.50061	1.06491e-69	1.00445e-68			AT1G06100	AT1G06100	-2.56839	1.68164e-06	3.77359e-06
AT3G21380	JAL36	7.38154	1.07151e-71	1.03799e-70			AT1G06135	AT1G06135	-1.60339	6.68093e-05	0.000133542
AT3G12470	AT3G12470	7.35189	1.52741e-85	1.6999e-84			AT1G06240	AT1G06240	-1.25891	3.6178e-41	2.29034e-40
AT5G54740	SESA5	7.2696	1.08673e-99	1.37964e-98			AT1G06420	AT1G06420	-1.23332	2.77045e-06	6.13376e-06
AT5G20790	AT5G20790	7.20022	0	0			AT1G06690	AT1G06690	-1.73709	2.15698e-211	5.99758e-210
AT3G25080	AT3G25080	7.13893	2.86166e-57	2.28487e-56			AT1G07000	ATEXO70B2	-1.36104	2.15164e-212	6.00188e-211
AT1G77655	AT1G77655	6.87944	2.01128e-59	1.65228e-58			AT1G07110	FKFBP	-1.39026	0	0
AT4G27150	2S2	6.85492	3.50324e-195	8.94265e-194			AT1G07135	AT1G07135	-3.48656	8.05133e-89	9.24367e-88
AT5G40420	OLEO2	6.84519	6.95197e-93	8.30586e-92			AT1G07150	MAPKKK13	-1.46523	3.08391e-22	1.29043e-21
AT2G20800	NDB4	6.81609	1.04337e-61	8.88953e-61			AT1G07160	AT1G07160	-4.79042	3.28558e-56	2.58315e-55
AT2G26010	PDF1.3	6.79906	1.88454e-204	4.9908e-203			AT1G07500	AT1G07500	-1.20476	0.000363396	0.000680473
AT5G36240	AT5G36240	6.74218	2.24283e-39	1.37561e-38			AT1G07520	SCL31	-1.29431	2.43702e-106	3.28345e-105
AT3G05300	AT3G05300	6.67105	1.58697e-51	1.1723e-50			AT1G07870	AT1G07870	-1.38355	1.57754e-110	2.20258e-109
AT1G63540	AT1G63540	6.6511	1.44428e-50	1.05205e-49			AT1G07985	AT1G07985	-1.47277	3.96048e-27	1.88343e-26
AT1G49330	AT1G49330	6.64326	1.15483e-76	1.17847e-75			AT1G08550	VDE1	-1.38776	5.16654e-293	2.07335e-291
AT5G44220	AT5G44220	6.61317	2.17456e-55	1.69438e-54			AT1G08610	AT1G08610	-1.56785	5.39407e-71	5.16982e-70
AT4G18330	AT4G18330	6.59154	6.57933e-52	4.87948e-51			AT1G08630	THA1	-1.58033	3.21541e-161	6.55738e-160
AT5G54000	AT5G54000	6.57767	4.66153e-51	3.42225e-50			AT1G08860	BON3	-2.15471	1.6317e-06	3.665e-06
AT2G18460	LCV3	6.54213	1.12675e-70	1.07557e-69			AT1G08920	SUGTL2	-1.6974	2.10731e-245	6.97063e-244
AT3G23060	AT3G23060	6.50517	4.74391e-121	7.20398e-120			AT1G08930	ERD6	-1.09918	0	0
AT3G30867	AT3G30867	6.4496	9.39321e-159	1.88621e-157			AT1G08980	AMI1	-1.3313	0	0
AT4G01980	AT4G01980	6.39512	2.28164e-63	1.98864e-62			AT1G09070	SRC2	-2.87256	0	0
AT1G12805	AT1G12805	6.38054	3.50816e-89	4.04365e-88			AT1G09240	NAS3	-1.13428	2.48466e-17	9.03309e-17
AT4G25140	OLEO1	6.34981	1.53943e-80	1.63272e-79			AT1G09340	CSP41B	-1.19374	0	0
AT5G52620	AT5G52620	6.33927	9.35746e-33	5.02026e-32			AT1G09415	NIMIN-3	-1.33939	2.75716e-54	2.11744e-53
AT1G21860	sks7	6.33144	1.08417e-60	9.10666e-60			AT1G09500	AT1G09500	-1.05553	1.60636e-76	1.63416e-75
AT1G17810	TIP3-2	6.30947	1.25101e-166	2.65472e-165			AT1G09575	AT1G09575	-2.22378	4.69082e-134	8.00099e-133
AT5G55410	AT5G55410	6.27951	7.45202e-51	5.45404e-50			AT1G09600	AT1G09600	-2.28944	2.84636e-08	7.07937e-08
AT4G27170	AT2S4	6.26632	8.21379e-65	7.31248e-64			AT1G09930	OPT2	-2.39032	1.79639e-18	6.78542e-18
AT2G45130	SPX3	6.26478	1.22683e-146	2.27499e-145			AT1G09932	AT1G09932	-1.40165	1.6724e-60	1.39937e-59
AT1G75830	PDF1.1	6.25128	4.29446e-56	3.3733e-55			AT1G09940	HEMA2	-2.18433	0	0
AT5G21150	AGO9	6.22235	0	0			AT1G09950	RAS1	-4.19973	1.49445e-32	7.98004e-32
AT1G67220	HAC2	6.14809	2.15325e-63	1.87799e-62			AT1G09970	LRR XI-23	-1.08376	0	0
AT5G44120	CRA1	6.11678	6.87419e-242	2.22879e-240			AT1G10155	ATPP2-A10	-1.27328	0.00936935	0.0151946
AT4G31940	CYP82C4	6.11601	1.47702e-34	8.25067e-34			AT1G10160	AT1G10160	-3.94958	9.19018e-101	1.17931e-99
AT5G32460	AT5G32460	6.11416	4.67117e-153	9.04003e-152			AT1G10330	PCMP-E71	-1.32691	3.35241e-06	7.38846e-06
AT2G33070	NSP2	6.05296	2.13598e-135	3.68168e-134			AT1G10340	AT1G10340	-3.79584	4.69164e-259	1.64333e-257
AT3G61340	AT3G61340	6.05014	3.96505e-100	5.0509e-99			AT1G10760	GWD1	-1.25052	0	0
AT2G04460	AT2G04460	6.03477	3.391e-243	1.10768e-241			AT1G10830	Z-ISO	-1.02201	2.4053e-63	2.09503e-62
AT3G15605	AT3G15605	6.02469	8.36109e-43	5.41371e-42			AT1G11050	AT1G11050	-2.41705	0	0
AT1G65090	AT1G65090	6.00974	8.0624e-52	5.97092e-51			AT1G11070	AT1G11070	-1.52065	5.21992e-10	1.41974e-09
AT3G54940	AT3G54940	6.00608	1.70428e-52	1.27626e-51			AT1G11080	SCPL31	-1.0697	8.59094e-56	6.71994e-55
AT1G43800	S-ACP-DES6	5.94014	0	0			AT1G11180	SCAMP5	-1.30569	1.59939e-85	1.77925e-84
AT4G25330	AT4G25330	5.92412	3.21432e-50	2.32778e-49			AT1G11185	AT1G11185	-2.88396	3.59569e-107	4.88733e-106
AT1G20925	AT1G20925	5.89942	3.71951e-95	4.51606e-94			AT1G11210	AT1G11210	-1.39056	2.13723e-125	3.37685e-124
AT2G41470	AT2G41470	5.87427	2.83872e-68	2.63761e-67			AT1G11265	AT1G11265	-1.56451	5.66608e-10	1.53837e-09
AT1G63320	AT1G63320	5.84834	1.94959e-28	9.52054e-28			AT1G11670	AT1G11670	-1.78815	0	0
AT1G23110	AT1G23110	5.84533	2.7587e-171	6.06056e-170			AT1G11860	GDCST	-1.13534	0	0
AT5G57200	AT5G57200	5.84236	3.02136e-39	1.84878e-38			AT1G11925	AT1G11925	-4.22765	8.51994e-24	3.71912e-23
AT5G57380	VIN3	5.84185	1.26821e-53	9.65454e-53			AT1G11960	AT1G11960	-2.41248	0	0
AT5G34871	AT5G34871	5.80148	5.63786e-33	3.03778e-32			AT1G12250	AT1G12250	-1.02109	2.35398e-173	5.23296e-172
AT1G11370	PME56	5.78145	4.28175e-50	3.09225e-49			AT1G12570	AT1G12570	-2.79286	1.6726e-16	5.91801e-16
AT4G10020	HSD5	5.75736	8.20585e-158	1.64023e-156			AT1G12580	PEPKR1	-1.01687	5.68479e-183	1.34365e-181
AT3G29410	TPS25	5.71338	2.41223e-288	9.49113e-287			AT1G12610	DREB1F	-7.35184	8.45001e-229	2.57386e-227
AT1G65200	AT1G65200	5.68054	5.62413e-54	4.30028e-53			AT1G12880	NUDT12	-1.12444	1.26736e-36	7.36898e-36
AT1G02770	AT1G02770	5.67626	0	0			AT1G12890	ERF088	-1.4089	1.31038e-05	2.76545e-05
AT4G09600	GASA3	5.66428	1.42592e-40	8.92992e-40			AT1G12900	GAPA2	-1.10216	0	0
AT3G54530	AT3G54530	5.66361	5.83941e-32	3.07483e-31			AT1G13340	AT1G13340	-1.75545	6.09487e-92	7.21268e-91
AT3G11740	AT3G11740	5.65994	7.50167e-38	4.46601e-37			AT1G13480	AT1G13480	-2.57198	9.89236e-27	4.66031e-26
AT5G10120	EIL4	5.65202	1.44079e-30	7.38894e-30			AT1G13520	AT1G13520	-1.84399	3.9539e-29	1.96046e-28
AT3G12203	SCPL17	5.63933	1.10687e-81	1.18547e-80			AT1G13540	AT1G13540	-5.37459	1.88949e-31	9.83459e-31
AT3G32230	AT3G32230	5.61318	1.78689e-21	7.3397e-21			AT1G13550	AT1G13550	-3.82411	3.81963e-12	1.1469e-11
AT1G21290	AT1G21290	5.61225	8.11e-31	4.18042e-30			AT1G13590	PSK1	-1.07454	7.83472e-15	2.6268e-14
AT1G12070	AT1G12070	5.6066	1.23239e-154	2.41177e-153			AT1G13650	AT1G13650	-2.30274	6.31412e-46	4.2878e-45
AT5G20150	SPX1	5.58186	0	0			AT1G14030	LSMT-L	-1.08334	1.08649e-118	1.6189e-117
AT1G77100	PER13	5.5779	2.20565e-29	1.10135e-28			AT1G14040	PHO1	-1.49815	3.24213e-153	6.28372e-152
AT3G20210	dVPE	5.57349	2.61169e-35	1.47847e-34			AT1G14150	PNSL2	-1.3563	8.60547e-195	2.19243e-193
AT5G44430	PDF1.2C	5.55117	4.05512e-41	2.56347e-40			AT1G14345	AT1G14345	-1.0257	1.73694e-96	2.13466e-95
AT2G19770	PRO4	5.49521	3.41189e-31	1.76952e-30			AT1G14480	AT1G14480	-2.4927	8.87286e-120	1.33348e-118
AT3G56350	MSD2	5.46121	6.24169e-40	3.86908e-39			AT1G14490	AHL28	-1.61022	1.60376e-05	3.36372e-05
AT3G55240	AT3G55240	5.43006	9.36557e-99	1.18096e-97			AT1G14540	PER4	-3.90955	7.03775e-194	1.78606e-192
AT2G46880	PAP14	5.41924	3.48347e-143	6.32513e-142			AT1G14550	PER5	-2.43877	1.36855e-05	2.88519e-05
AT3G47420	ATPS3	5.41027	0	0			AT1G14790	RDR1	-3.0668	1.41202e-90	1.6523e-89
AT5G65080	MAF5	5.40174	0	0			AT1G14870	PCR2	-1.55795	0	0
AT5G09210	AT5G09210	5.40157	1.55819e-30	7.98317e-30			AT1G14880	PCR1	-6.52976	1.91154e-55	1.49033e-54
AT4G01985	AT4G01985	5.36057	1.78548e-101	2.30474e-100			AT1G15010	AT1G15010	-3.09561	5.01394e-80	5.28565e-79
AT1G66990	AT1G66990	5.31815	3.04152e-29	1.51324e-28			AT1G15050	IAA34	-1.46088	0.000600309	0.00110132
AT5G41830	AT5G41830	5.31015	4.39683e-29	2.1772e-28			AT1G15175	AT1G15175	-1.27978	5.1294e-09	1.33053e-08
AT3G28890	AtRLP43	5.3073	4.87003e-86	5.44316e-85			AT1G15180	AT1G15180	-1.00382	7.26814e-114	1.04375e-112
AT1G14960	AT1G14960	5.29842	1.05466e-290	4.20019e-289			AT1G15330	PV42A	-2.07882	8.33594e-53	6.27113e-52
AT3G17520	AT3G17520	5.29357	2.09493e-59	1.71992e-58			AT1G15430	AT1G15430	-1.05408	1.82529e-40	1.14091e-39
AT1G13609	AT1G13609	5.28179	5.7163e-44	3.76933e-43			AT1G15885	AT1G15885	-1.14077	2.99835e-12	9.04448e-12
AT1G07645	ATDSI-1VOC	5.26628	1.61365e-34	8.99854e-34			AT1G15890	AT1G15890	-1.6864	4.53481e-36	2.60433e-35
AT2G11810	MGD3	5.2597	0	0			AT1G15980	PNSB1	-1.07654	0	0
AT1G67100	LBD40	5.25369	5.358e-39	3.26941e-38			AT1G16110	WAKL6	-2.29548	7.48533e-164	1.54947e-162
AT5G45690	AT5G45690	5.24397	1.70567e-37	1.00833e-36			AT1G16120	WAKL1	-1.48472	0.0148187	0.0234364
AT5G09470	PUMP6	5.2374	5.18088e-29	2.56108e-28			AT1G16130	WAKL2	-4.69409	0	0
AT2G22180	AT2G22180	5.2366	3.6981e-29	1.83467e-28			AT1G16140	WAKL3	-1.08254	0.0108998	0.0175569
AT1G14930	AT1G14930	5.2191	3.71044e-46	2.53283e-45			AT1G16150	WAKL4	-2.04602	0.00221619	0.0038473
AT4G13985	FBD1	5.19957	5.96008e-20	2.34893e-19			AT1G16260	WAKL8	-1.23302	1.07956e-39	6.66041e-39
AT3G28610	AT3G28610	5.19833	2.84555e-26	1.32527e-25			AT1G16370	2024-10-06	-2.16316	2.41078e-89	2.78245e-88
AT2G21450	CHR34	5.18325	1.59778e-49	1.14662e-48			AT1G16550	AT1G16550	-2.6766	1.92838e-60	1.61099e-59
AT5G60470	IDD13	5.17351	2.55002e-30	1.30087e-29			AT1G16670	AT1G16670	-1.16505	1.71498e-90	2.00324e-89
AT1G30560	AT1G30560	5.1667	1.25254e-21	5.1692e-21			AT1G16720	HCF173	-1.083	1.77731e-247	5.97728e-246
AT1G66390	MYB90	5.12537	1.06075e-21	4.38251e-21			AT1G16880	ACR11	-1.34048	0	0
AT1G66700	PXMT1	5.101	5.71444e-99	7.21962e-98			AT1G17100	AT1G17100	-1.08557	1.35805e-100	1.73757e-99
AT5G01300	AT5G01300	5.08713	2.89755e-33	1.57291e-32			AT1G17147	VQ1	-2.18389	1.1172e-93	1.34151e-92
AT1G59790	AT1G59790	5.03075	1.51872e-17	5.56232e-17			AT1G17220	FUG1	-1.01842	0	0
AT5G50790	SWEET10	4.99759	9.52145e-99	1.20004e-97			AT1G17255	AT1G17255	-1.65495	1.20237e-14	3.9995e-14
AT5G22470	PARP3	4.98917	1.3521e-33	7.40273e-33			AT1G17380	TIFY11A	-4.25649	0	0
AT2G34202	MIR399D	4.98513	1.34841e-40	8.45261e-40			AT1G17420	LOX3	-4.15247	0	0
AT1G70260	AT1G70260	4.97783	9.05652e-32	4.74307e-31			AT1G17600	AT1G17600	-3.43506	2.85772e-42	1.83355e-41
AT1G14950	AT1G14950	4.97557	2.29297e-25	1.04105e-24			AT1G17610	AT1G17610	-5.02904	1.07728e-40	6.76919e-40
AT5G37940	AT5G37940	4.9749	1.40501e-20	5.64269e-20			AT1G17620	AT1G17620	-1.80494	6.88631e-222	2.0087e-220
AT3G30393	AT3G30393	4.96016	7.69283e-32	4.04101e-31			AT1G17750	PEPR2	-1.79028	1.06193e-128	1.72903e-127
AT2G21720	AT2G21720	4.94916	8.0722e-30	4.07189e-29			AT1G17860	AT1G17860	-1.0183	3.02219e-69	2.83526e-68
AT5G66980	AT5G66980	4.94716	6.34587e-22	2.63764e-21			AT1G17990	AT1G17990	-1.33464	1.50925e-97	1.87599e-96
AT3G22640	PAP85	4.94637	0	0			AT1G18020	AT1G18020	-1.29687	6.808e-66	6.13189e-65
AT1G20860	PHT1-8	4.93249	5.43037e-29	2.6839e-28			AT1G18170	FKBP17-2	-1.15211	5.30027e-113	7.55346e-112
AT2G02990	RNS1	4.92699	2.50819e-72	2.44785e-71			AT1G18200	RABA6B	-1.14026	8.20331e-40	5.07662e-39
AT5G61620	AT5G61620	4.92008	4.60478e-28	2.23119e-27			AT1G18210	CML27	-1.78152	0	0
AT4G15370	BARS1	4.9045	2.02117e-86	2.26873e-85			AT1G18265	AT1G18265	-1.69418	3.49168e-27	1.66139e-26
AT1G66800	AT1G66800	4.89991	4.69878e-124	7.33116e-123			AT1G18290	AT1G18290	-2.15468	4.79319e-15	1.61824e-14
AT2G39510	AT2G39510	4.8911	2.26852e-82	2.43862e-81			AT1G18300	NUDT4	-4.28111	0	0
AT1G10550	XTH33	4.85674	0	0			AT1G18390	AT1G18390	-1.22746	1.13723e-102	1.48186e-101
AT1G73220	2024-10-01	4.83945	1.50795e-93	1.8074e-92			AT1G18485	PCMP-H8	-1.15012	1.37781e-75	1.38815e-74
AT1G73010	PS2	4.83487	0	0			AT1G18730	PNSB4	-1.38123	2.70406e-57	2.16102e-56
AT5G04500	AT5G04500	4.82871	1.95562e-25	8.8989e-25			AT1G18740	AT1G18740	-3.13704	0	0
AT3G07920	AT3G07920	4.82691	1.79889e-23	7.77853e-23			AT1G18773	AT1G18773	-1.8869	3.48304e-30	1.772e-29
AT5G40290	AT5G40290	4.82299	6.78009e-15	2.27788e-14			AT1G18990	MYOB5	-2.38165	1.03224e-05	2.19511e-05
AT5G41765	AT5G41765	4.76598	9.27114e-40	5.73203e-39			AT1G19020	AT1G19020	-3.85735	0	0
AT2G26020	PDF1.2B	4.76339	6.34864e-56	4.97342e-55			AT1G19025	AT1G19025	-1.51849	3.72126e-44	2.46374e-43
AT5G60250	AT5G60250	4.74475	0	0			AT1G19050	ARR7	-1.9483	6.81723e-132	1.14636e-130
AT3G44490	HDA17	4.7397	4.16464e-21	1.69653e-20			AT1G19150	LHCA6	-1.39416	8.32867e-206	2.23278e-204
AT1G48990	AT1G48990	4.69719	1.13271e-26	5.32377e-26			AT1G19180	TIFY10A	-2.99398	0	0
AT3G47720	SRO4	4.69447	1.02417e-22	4.346e-22			AT1G19210	ERF017	-4.73094	4.83254e-165	1.00912e-163
AT1G73190	TIP3-1	4.69443	3.79644e-130	6.25528e-129			AT1G19371	MIR169H	-2.50826	0.000192282	0.000370039
AT4G37990	CAD8	4.69158	8.80975e-36	5.03071e-35			AT1G19380	AT1G19380	-1.85849	6.16631e-269	2.25969e-267
AT3G15670	AT3G15670	4.68863	7.92146e-49	5.63067e-48			AT1G19770	PUP14	-3.11921	0	0
AT1G04560	AT1G04560	4.6858	1.62376e-48	1.14857e-47			AT1G20020	LFNR2	-1.55571	0	0
AT1G48530	AT1G48530	4.67212	2.39465e-40	1.4943e-39			AT1G20030	AT1G20030	-1.00499	1.85345e-15	6.34177e-15
AT1G73120	AT1G73120	4.66908	1.27053e-260	4.48631e-259			AT1G20150	AT1G20150	-2.39612	0.000303807	0.000573197
AT1G03880	CRB	4.66219	1.04328e-41	6.6401e-41			AT1G20160	CRSP	-1.38704	2.65533e-61	2.24843e-60
AT2G25150	SCT	4.64571	3.13947e-81	3.3501e-80			AT1G20310	AT1G20310	-4.83396	7.01259e-112	9.89668e-111
AT1G47540	ATTI7	4.64347	2.60265e-32	1.38158e-31			AT1G20350	TIM17-1	-2.81388	1.38578e-38	8.37387e-38
AT1G62290	APA2	4.62801	0	0			AT1G20390	AT1G20390	-2.21338	0	0
AT4G13700	ATPAP23	4.61457	1.22994e-21	5.07673e-21			AT1G20400	AT1G20400	-2.61663	7.62155e-10	2.05649e-09
AT4G11710	AT4G11710	4.58082	4.4072e-22	1.83622e-21			AT1G20440	COR47	-1.07834	0	0
AT4G22090	AT4G22090	4.57729	1.89789e-15	6.49214e-15			AT1G20450	ERD10	-1.24567	0	0
AT5G43660	AT5G43660	4.57066	8.31212e-256	2.8579e-254			AT1G20490	AT1G20490	-1.18288	9.83097e-27	4.63222e-26
AT3G47710	PRE4	4.56472	4.28453e-30	2.1751e-29			AT1G20510	4CLL5	-3.10088	0	0
AT1G61440	AT1G61440	4.53113	1.32703e-116	1.94629e-115			AT1G20680	AT1G20680	-3.15614	1.99253e-06	4.44986e-06
AT2G34700	AT2G34700	4.52547	3.45169e-37	2.02815e-36			AT1G20823	ATL80	-2.65902	7.9338e-203	2.07796e-201
AT4G23200	CRK12	4.51794	6.50374e-114	9.35002e-113			AT1G21010	AT1G21010	-1.30371	1.15e-106	1.55608e-105
AT5G38260	AT5G38260	4.50877	1.4648e-13	4.66203e-13			AT1G21090	AT1G21090	-2.04294	1.07453e-122	1.65285e-121
AT1G09350	GOLS3	4.50077	4.61136e-14	1.50033e-13			AT1G21100	AT1G21100	-1.74566	2.35064e-230	7.21036e-229
AT2G34655	AT2G34655	4.49926	2.87635e-51	2.11701e-50			AT1G21326	AT1G21326	-3.53122	7.08768e-115	1.02571e-113
AT1G60090	BGLU4	4.49443	1.33676e-19	5.22033e-19			AT1G21350	AT1G21350	-1.09293	1.22975e-118	1.83133e-117
AT2G15010	AT2G15010	4.47712	1.67764e-34	9.3494e-34			AT1G21500	AT1G21500	-1.29246	1.54931e-74	1.54547e-73
AT5G09570	AT5G09570	4.47315	2.96391e-42	1.90028e-41			AT1G21528	AT1G21528	-1.13922	0.00817761	0.0133646
AT4G10270	AT4G10270	4.46425	2.15957e-73	2.13469e-72			AT1G21550	CML44	-5.88521	3.42985e-132	5.77862e-131
AT1G14940	AT1G14940	4.4424	7.44763e-19	2.84478e-18			AT1G21680	AT1G21680	-1.497	0	0
AT1G20735	AT1G20735	4.41542	4.54312e-12	1.36039e-11			AT1G21910	ERF012	-1.30871	1.63389e-206	4.4073e-205
AT1G63600	CRRSP4	4.40052	1.83121e-24	8.12784e-24			AT1G21945	AT1G21945	-2.58097	1.36731e-07	3.27526e-07
AT5G35025	AT5G35025	4.39381	3.49201e-12	1.05035e-11			AT1G22190	RAP2-13	-1.28042	6.52044e-112	9.20709e-111
AT4G16540	AT4G16540	4.39158	3.05765e-105	4.07349e-104			AT1G22350	AT1G22350	-1.32736	4.37036e-35	2.46658e-34
AT3G12460	AT3G12460	4.37734	1.4369e-110	2.00729e-109			AT1G22470	AT1G22470	-1.88318	8.04042e-37	4.69383e-36
AT1G30920	AT1G30920	4.37246	6.89748e-26	3.17398e-25			AT1G22480	AT1G22480	-3.719	5.59337e-09	1.44887e-08
AT2G39820	EIF6-1	4.37187	9.42904e-33	5.05659e-32			AT1G22490	BHLH94	-2.0953	7.4273e-30	3.75092e-29
AT5G43370	PHT1-2	4.37091	0	0			AT1G22510	AT1G22510	-1.18227	4.74925e-32	2.50532e-31
AT2G41360	AT2G41360	4.35936	1.69809e-20	6.80822e-20			AT1G22570	NPF5.15	-1.52514	2.2982e-265	8.3286e-264
AT4G36350	PAP25	4.32493	1.94807e-17	7.10696e-17			AT1G22590	AGL87	-2.87945	5.98638e-301	2.48625e-299
AT5G55240	PXG2	4.31434	1.12316e-23	4.88894e-23			AT1G22810	ERF019	-3.14397	5.18002e-124	8.06757e-123
AT1G64405	AT1G64405	4.31284	9.82778e-119	1.46772e-117			AT1G22885	AT1G22885	-1.12554	4.41453e-70	4.185e-69
AT1G57800	ORTH3	4.30931	1.381e-11	4.04138e-11			AT1G22890	AT1G22890	-1.19999	1.07213e-128	1.74454e-127
AT1G70080	TPS06	4.3038	6.92538e-105	9.20745e-104			AT1G22980	AT1G22980	-4.64199	7.92748e-20	3.11492e-19
AT1G21529	AT1G21529	4.30345	5.94251e-16	2.06379e-15			AT1G23310	GGAT1	-1.02327	0	0
AT1G34510	PER8	4.3028	0	0			AT1G23510	AT1G23510	-1.3787	0.0051038	0.0085406
AT2G20470	AT2G20470	4.29853	7.14924e-52	5.29914e-51			AT1G23710	AT1G23710	-2.63205	0	0
AT5G09910	AT5G09910	4.29515	5.12262e-20	2.02284e-19			AT1G23830	AT1G23830	-1.46582	1.36264e-21	5.61737e-21
AT3G31990	AT3G31990	4.2929	6.56945e-13	2.03757e-12			AT1G23840	AT1G23840	-1.77851	3.73222e-13	1.16964e-12
AT3G10510	AT3G10510	4.28787	1.20664e-19	4.71712e-19			AT1G23850	AT1G23850	-1.51327	5.89325e-39	3.58931e-38
AT1G69470	AT1G69470	4.27998	3.17064e-11	9.11546e-11			AT1G23870	TPS9	-1.21243	0	0
AT5G43340	PHT1-6	4.26694	2.67868e-11	7.72571e-11			AT1G23935	AT1G23935	-2.99567	1.26257e-27	6.0537e-27
AT2G15555	AT2G15555	4.26194	3.10516e-25	1.40662e-24			AT1G23940	AT1G23940	-2.86111	2.44351e-18	9.19523e-18
AT1G78500	PEN6	4.25813	2.4864e-30	1.26866e-29			AT1G24130	AT1G24130	-1.10108	4.10838e-05	8.35568e-05
AT5G07500	PEI1	4.24692	6.83852e-46	4.63909e-45			AT1G24140	AT1G24140	-3.36876	1.17053e-142	2.11365e-141
AT4G01975	AT4G01975	4.24654	1.5409e-26	7.22409e-26			AT1G24147	AT1G24147	-2.50123	1.72719e-36	9.99381e-36
AT2G22710	AT2G22710	4.24379	7.92759e-23	3.37277e-22			AT1G24150	ATFH4	-1.47145	6.63872e-87	7.48071e-86
AT3G43190	SUS4	4.24085	0	0			AT1G24260	2024-09-03	-2.92993	7.31187e-77	7.4908e-76
AT1G54870	AT1G54870	4.21429	9.74816e-37	5.68443e-36			AT1G24330	PUB6	-2.91875	6.10655e-230	1.87093e-228
AT5G33330	AT5G33330	4.19059	1.10105e-10	3.09011e-10			AT1G24822	AT1G24822	-1.08961	0.00547493	0.00912836
AT1G48670	AT1G48670	4.18643	5.91065e-17	2.12493e-16			AT1G25400	AT1G25400	-1.63436	1.8504e-157	3.68742e-156
AT1G48470	GLN1-5	4.18002	5.92466e-30	2.99959e-29			AT1G26540	AT1G26540	-3.72908	7.60935e-25	3.41214e-24
AT4G01970	RFS4	4.17943	2.88162e-65	2.57857e-64			AT1G26610	AT1G26610	-1.00094	0.00147115	0.00260278
AT5G07550	GRP19	4.17029	1.05854e-32	5.67091e-32			AT1G26780	MYB117	-1.03509	0.000160293	0.000310602
AT3G28415	ABCB22	4.16703	3.35937e-18	1.2573e-17			AT1G27045	ATHB-54	-1.2037	0.00592159	0.00983486
AT4G36700	AT4G36700	4.15385	4.27103e-25	1.92775e-24			AT1G27100	AT1G27100	-2.47301	0	0
AT4G32810	CCD8	4.15303	1.98493e-207	5.38193e-206			AT1G27480	LCAT1	-1.60162	2.58812e-111	3.63295e-110
AT4G21020	AT4G21020	4.13034	9.78229e-35	5.48316e-34			AT1G27730	ZAT10	-3.27989	0	0
AT3G05950	AT3G05950	4.12173	2.17619e-49	1.55786e-48			AT1G27770	ACA1	-2.57591	0	0
AT4G26740	PXG1	4.11819	2.55412e-32	1.35637e-31			AT1G28140	AT1G28140	-1.13295	4.95738e-175	1.1153e-173
AT5G45830	DOG1	4.11663	1.20837e-111	1.70075e-110			AT1G28150	AT1G28150	-1.05845	2.624e-115	3.81216e-114
AT4G29550	AT4G29550	4.11444	1.12411e-120	1.70112e-119			AT1G28190	AT1G28190	-1.02816	1.54981e-38	9.34564e-38
AT3G21720	ICL	4.11014	0	0			AT1G28370	ERF11	-3.91554	0	0
AT4G32280	IAA29	4.10151	7.77076e-71	7.42593e-70			AT1G28380	NSL1	-2.05107	0	0
AT4G04930	DES-1-LIKE	4.09984	2.12991e-12	6.47033e-12			AT1G28480	GRXC9	-4.91497	0	0
AT5G44420	PDF1.2A	4.09064	1.84751e-45	1.2462e-44			AT1G28600	AT1G28600	-1.15038	5.84214e-136	1.00964e-134
AT3G03670	PER28	4.07575	7.25443e-12	2.15133e-11			AT1G29070	RPL34	-1.04204	3.32123e-152	6.385e-151
AT4G04293	AT4G04293	4.07435	1.56952e-12	4.79524e-12			AT1G29110	AT1G29110	-1.04925	0.00296294	0.00508129
AT2G05580	AT2G05580	4.07232	5.29064e-108	7.22869e-107			AT1G29340	PUB17	-1.51807	0	0
AT4G05370	AT4G05370	4.0687	5.14618e-15	1.7363e-14			AT1G29600	AT1G29600	-1.86765	8.79067e-26	4.03735e-25
AT1G60450	GOLS7	4.03549	3.29061e-10	9.03355e-10			AT1G29690	CAD1	-2.24631	6.33758e-302	2.6447e-300
AT3G17010	AT3G17010	4.035	5.72122e-13	1.77913e-12			AT1G29700	AT1G29700	-1.19193	1.85284e-142	3.33651e-141
AT3G17790	PAP17	4.01868	0	0			AT1G29720	RFK1	-1.14279	2.99504e-45	2.01505e-44
AT2G41280	M10	4.01652	5.01485e-42	3.20894e-41			AT1G29730	AT1G29730	-1.18398	7.9115e-07	1.81138e-06
AT4G39130	AT4G39130	4.01534	7.96459e-19	3.03914e-18			AT1G29920	LHCB1.2	-2.49239	0	0
AT1G34520	AT1G34520	4.00426	6.72653e-31	3.47208e-30			AT1G30135	TIFY5A	-7.58952	0	0
AT4G12470	AZI1	3.9961	0	0			AT1G30160	AT1G30160	-1.32009	0.00134697	0.00239246
AT5G02390	AT5G02390	3.98977	1.53512e-90	1.79475e-89			AT1G30360	ERD4	-1.29337	0	0
AT5G53240	AT5G53240	3.98192	6.78885e-17	2.43463e-16			AT1G30380	PSAK	-1.03793	1.15096e-281	4.45487e-280
AT1G70840	MLP31	3.98	6.34801e-11	1.79894e-10			AT1G30520	AAE14	-1.17618	3.23252e-114	4.66e-113
AT2G22950	ACA7	3.97335	4.03447e-10	1.10271e-09			AT1G30720	AT1G30720	-2.08062	6.47003e-154	1.25959e-152
AT3G58450	AT3G58450	3.97003	7.79782e-19	2.9768e-18			AT1G30730	AT1G30730	-1.76352	1.49077e-144	2.73918e-143
AT5G06640	AT5G06640	3.96947	1.72807e-180	4.02269e-179			AT1G30814	AT1G30814	-2.18971	0.000843922	0.00152674
AT5G62800	AT5G62800	3.96883	4.54045e-20	1.79485e-19			AT1G30820	AT1G30820	-1.82007	0	0
AT3G03260	HDG8	3.96835	4.20026e-38	2.5097e-37			AT1G31130	AT1G31130	-2.0171	0	0
AT3G03530	NPC4	3.96404	6.17996e-215	1.74057e-213			AT1G31290	AGO3	-4.98826	3.95151e-231	1.21494e-229
AT1G59670	GSTU15	3.96394	6.25604e-26	2.8849e-25			AT1G31690	AT1G31690	-1.92331	1.24437e-10	3.48374e-10
AT3G27250	AT3G27250	3.95569	1.4548e-30	7.45932e-30			AT1G31835	AT1G31835	-1.08979	1.51641e-16	5.37334e-16
AT3G62640	AT3G62640	3.95276	8.27975e-15	2.77175e-14			AT1G32060	PRK	-1.00557	0	0
AT3G20557	AT3G20557	3.952	8.35078e-14	2.69219e-13			AT1G32080	PLGG1	-1.02162	5.61877e-298	2.31156e-296
AT2G37670	AT2G37670	3.95196	0	0			AT1G32350	AOX3	-1.61827	3.29143e-09	8.62238e-09
AT4G25530	HDG6	3.94124	1.9496e-16	6.88411e-16			AT1G32375	AT1G32375	-2.33527	0.000263983	0.000501461
AT5G56510	APUM12	3.93347	2.73483e-38	1.63971e-37			AT1G32470	GDH3	-1.52576	0	0
AT1G01580	FRO2	3.9289	6.01034e-33	3.23448e-32			AT1G32510	ANAC011	-2.21896	1.13773e-07	2.73811e-07
AT3G05150	AT3G05150	3.92514	0	0			AT1G32550	FdC1	-1.00088	1.74518e-88	1.99749e-87
AT5G56080	NAS2	3.91975	1.63462e-67	1.50334e-66			AT1G32640	MYC2	-2.89354	0	0
AT5G35940	JAL41	3.91614	0	0			AT1G32910	AT1G32910	-1.91226	7.13967e-11	2.01803e-10
AT2G21260	AT2G21260	3.91279	9.86397e-138	1.7206e-136			AT1G32920	AT1G32920	-3.119	0	0
AT4G12210	AT4G12210	3.91269	2.19981e-14	7.25368e-14			AT1G32928	AT1G32928	-2.91706	0	0
AT5G51210	OL3	3.91118	1.55697e-69	1.46435e-68			AT1G32960	SBT3.3	-1.63834	0.000405094	0.000754506
AT1G77950	AGL67	3.90854	1.72599e-21	7.09403e-21			AT1G33200	AT1G33200	-1.97249	0.00335818	0.00571864
AT4G20450	AT4G20450	3.89792	6.59947e-43	4.28155e-42			AT1G33540	scpl18	-1.23209	6.72816e-05	0.000134384
AT5G25600	AT5G25600	3.89269	3.78132e-09	9.87703e-09			AT1G33560	ADR1	-1.97461	2.31189e-272	8.60462e-271
AT3G21040	AT3G21040	3.88931	1.9771e-50	1.43776e-49			AT1G33600	AT1G33600	-1.34215	0	0
AT1G62190	FAD4L1	3.87857	4.48909e-19	1.72629e-18			AT1G33610	AT1G33610	-1.98293	8.56526e-132	1.43937e-130
AT1G13610	AT1G13610	3.87312	6.30838e-18	2.33794e-17			AT1G33760	ERF022	-1.95536	1.76183e-52	1.31898e-51
AT4G36110	AT4G36110	3.86523	7.60988e-43	4.92975e-42			AT1G33813	AT1G33813	-1.55187	0.0203944	0.0316913
AT5G44940	AT5G44940	3.85925	3.18807e-13	1.00163e-12			AT1G33817	AT1G33817	-2.03091	0.00150131	0.00265291
AT5G24860	FPF1	3.84924	4.43587e-17	1.60111e-16			AT1G34100	AT1G34100	-1.88984	5.61683e-05	0.000112883
AT5G57540	XTH13	3.84629	9.51952e-109	1.30544e-107			AT1G34180	NAC016	-1.85808	8.84491e-31	4.55296e-30
AT2G33520	AT2G33520	3.84439	2.78985e-26	1.30002e-25			AT1G34420	AT1G34420	-1.48036	3.28043e-35	1.85423e-34
AT4G14080	A6	3.83499	2.73506e-16	9.60316e-16			AT1G34750	AT1G34750	-1.32552	6.43966e-83	6.95967e-82
AT2G15318	AT2G15318	3.83427	4.14741e-16	1.44747e-15			AT1G35140	EXL1	-2.71609	0	0
AT4G25790	AT4G25790	3.83077	3.05486e-105	4.07185e-104			AT1G35210	AT1G35210	-3.37952	2.49344e-118	3.70687e-117
AT5G34480	AT5G34480	3.82626	3.37171e-11	9.67864e-11			AT1G36070	AT1G36070	-3.84463	3.43347e-191	8.48317e-190
AT5G65100	EIL5	3.81127	2.73387e-12	8.26287e-12			AT1G36622	AT1G36622	-2.10177	9.17275e-17	3.27161e-16
AT1G48660	AT1G48660	3.80576	1.15532e-17	4.25042e-17			AT1G37130	NIA2	-1.34799	0	0
AT2G46860	PPA3	3.80151	2.48868e-69	2.33727e-68			AT1G37150	HCS2	-3.44244	1.27882e-32	6.83979e-32
AT1G13420	SOT8	3.79941	4.46118e-186	1.07187e-184			AT1G42970	GAPB	-1.16481	0	0
AT4G15210	BAM5	3.79536	7.01795e-70	6.63145e-69			AT1G42980	FH12	-1.86355	3.51427e-05	7.18759e-05
AT4G33070	PDC1	3.77941	0	0			AT1G42990	BZIP60	-1.54223	1.34004e-213	3.74997e-212
AT5G06630	AT5G06630	3.77863	7.83802e-253	2.66686e-251			AT1G43000	AT1G43000	-2.3605	0.000292734	0.000553264
AT5G05840	AT5G05840	3.77644	9.29434e-24	4.05108e-23			AT1G43560	Aty2	-1.23445	9.56732e-138	1.66997e-136
AT5G05340	PER52	3.76905	1.79619e-22	7.57653e-22			AT1G43590	AT1G43590	-2.82624	2.23979e-58	1.81662e-57
AT2G20520	FLA6	3.76825	3.96111e-96	4.85445e-95			AT1G43600	AT1G43600	-2.30843	0.000590667	0.00108409
AT2G24800	PER18	3.76572	8.76801e-39	5.31422e-38			AT1G43670	AT1G43670	-1.35468	0	0
AT1G23160	AT1G23160	3.76373	2.39238e-70	2.27707e-69			AT1G43675	AT1G43675	-1.20916	2.60727e-17	9.47358e-17
AT3G45000	VPS24-2	3.76227	2.22417e-12	6.74886e-12			AT1G43765	AT1G43765	-1.25253	0.000996552	0.00179073
AT3G49580	LSU1	3.76216	1.77566e-64	1.57385e-63			AT1G44130	AT1G44130	-1.59294	0.000585165	0.00107482
AT2G24980	AT2G24980	3.76141	1.05425e-211	2.93452e-210			AT1G44180	AT1G44180	-2.06911	2.22198e-18	8.37361e-18
AT4G17710	HDG4	3.75816	1.04971e-18	3.99501e-18			AT1G44350	ILL6	-1.15307	1.0694e-67	9.86982e-67
AT5G20670	AT5G20670	3.7419	4.08088e-33	2.20521e-32			AT1G44740	AT1G44740	-1.15843	0.000492648	0.000911092
AT3G54700	PHT1-7	3.73878	4.94917e-14	1.60883e-13			AT1G44830	ERF014	-1.28242	4.82871e-09	1.25428e-08
AT1G73000	PYL3	3.73601	1.66043e-09	4.40667e-09			AT1G45140	AT1G45140	-2.99763	3.71707e-06	8.16532e-06
AT1G73560	AT1G73560	3.73252	4.69855e-12	1.40613e-11			AT1G45145	TRX5	-1.1241	4.7136e-113	6.72105e-112
AT5G53230	AT5G53230	3.73128	8.38875e-17	2.99811e-16			AT1G45163	AT1G45163	-1.08104	6.86338e-16	2.3776e-15
AT2G09187	AT2G09187	3.72336	2.29645e-08	5.74827e-08			AT1G45230	AT1G45230	-1.17307	2.58655e-124	4.04768e-123
AT5G39640	AT5G39640	3.72319	4.25572e-09	1.10874e-08			AT1G45616	AtRLP6	-1.83908	7.67212e-09	1.97502e-08
AT1G27860	AT1G27860	3.71512	9.10454e-09	2.33366e-08			AT1G47270	TULP6	-1.26885	2.51352e-66	2.27644e-65
AT2G24000	SCPL22	3.71415	9.83538e-12	2.89735e-11			AT1G47520	AT1G47520	-1.12362	3.05055e-24	1.34622e-23
AT3G21860	ASK10	3.7134	1.5987e-14	5.29897e-14			AT1G47820	AT1G47820	-1.03697	6.91169e-10	1.86823e-09
AT2G07630	AT2G07630	3.7108	5.58114e-09	1.44585e-08			AT1G47890	AtRLP7	-1.22619	0.000276583	0.000524178
AT2G25340	VAMP712	3.6872	6.57827e-13	2.04007e-12			AT1G47930	AT1G47930	-2.44665	9.54268e-05	0.000188143
AT2G34210	AT2G34210	3.68452	1.16613e-09	3.1179e-09			AT1G48030	LPD1	-1.26496	0	0
AT4G19680	IRT2	3.68267	2.63758e-109	3.64565e-108			AT1G48220	AT1G48220	-1.44581	0.0181536	0.0283982
AT1G32560	AT1G32560	3.67543	5.40162e-28	2.61148e-27			AT1G48390	AT1G48390	-1.57998	2.00416e-06	4.47468e-06
AT5G66830	AT5G66830	3.67132	1.47358e-101	1.90401e-100			AT1G48400	AT1G48400	-1.57751	0.0155976	0.0246073
AT3G02040	GDPD1	3.66218	0	0			AT1G48405	AT1G48405	-1.90922	0.00153474	0.00270906
AT5G39860	PRE1	3.66204	9.35207e-51	6.82939e-50			AT1G48710	AT1G48710	-1.91725	3.44895e-07	8.06522e-07
AT5G66970	AT5G66970	3.66175	2.24378e-10	6.20596e-10			AT1G48820	AT1G48820	-2.17132	0.000262997	0.000499696
[truncated: 2,931 more rows]

## Sheet: fus3 vs WT
up							down
[truncated: 3,471 more rows]
