# Supplementary material for: A FUS3-VAL transcriptional negative feedback circuit terminates seed maturation program and safeguards vegetative development
Source: Research Square preprint supplement (doi:10.21203/rs.3.rs-7986565/v1), 2025-11-12
Supplement: Supplementary file 10 [file f7a7d7eb3f5e06189e1910e5.xlsx]

## Sheet: VAL1 FUS3-GR overlap genes
AT1G01020
AT1G01030
AT1G01040
AT1G01050
AT1G01060
AT1G01070
AT1G01090
AT1G01120
AT1G01130
AT1G01140
AT1G01183
AT1G01190
AT1G01225
AT1G01230
AT1G01240
AT1G01250
AT1G01260
AT1G01300
AT1G01310
AT1G01320
AT1G01360
AT1G01380
AT1G01390
AT1G01420
AT1G01440
AT1G01453
AT1G01480
AT1G01490
AT1G01500
AT1G01540
AT1G01550
AT1G01570
AT1G01580
AT1G01600
AT1G01610
AT1G01650
AT1G01670
AT1G01720
AT1G01760
AT1G01800
AT1G01810
AT1G01830
AT1G01860
AT1G01910
AT1G01950
AT1G01990
AT1G02030
AT1G02040
AT1G02065
AT1G02070
AT1G02090
AT1G02180
AT1G02205
AT1G02210
AT1G02220
AT1G02228
AT1G02230
AT1G02250
AT1G02260
AT1G02300
AT1G02305
AT1G02310
AT1G02335
AT1G02340
AT1G02380
AT1G02390
AT1G02391
AT1G02400
AT1G02405
AT1G02450
AT1G02460
AT1G02475
AT1G02560
AT1G02610
AT1G02630
AT1G02640
AT1G02650
AT1G02660
AT1G02700
AT1G02720
AT1G02770
AT1G02800
AT1G02810
AT1G02850
AT1G02860
AT1G02880
AT1G02890
AT1G02900
AT1G02950
AT1G02990
AT1G03000
AT1G03020
AT1G03030
AT1G03040
AT1G03080
AT1G03090
AT1G03106
AT1G03120
AT1G03130
AT1G03160
AT1G03170
AT1G03180
AT1G03200
AT1G03220
AT1G03250
AT1G03290
AT1G03365
AT1G03370
AT1G03410
AT1G03440
AT1G03457
AT1G03470
AT1G03510
AT1G03520
AT1G03550
AT1G03590
AT1G03630
AT1G03710
AT1G03720
AT1G03730
AT1G03743
AT1G03800
AT1G03830
AT1G03840
AT1G03850
AT1G03880
AT1G03905
AT1G03930
AT1G03970
AT1G03980
AT1G03990
AT1G04000
AT1G04010
AT1G04030
AT1G04040
AT1G04100
AT1G04120
AT1G04150
AT1G04171
AT1G04180
AT1G04210
AT1G04220
AT1G04240
AT1G04250
AT1G04260
AT1G04270
AT1G04300
AT1G04310
AT1G04320
AT1G04330
AT1G04350
AT1G04370
AT1G04400
AT1G04410
AT1G04430
AT1G04440
AT1G04490
AT1G04520
AT1G04530
AT1G04550
AT1G04560
AT1G04570
AT1G04610
AT1G04620
AT1G04625
AT1G04650
AT1G04660
AT1G04670
AT1G04680
AT1G04684
AT1G04690
AT1G04700
AT1G04710
AT1G04770
AT1G04780
AT1G04800
AT1G04820
AT1G04830
AT1G04920
AT1G04945
AT1G04960
AT1G04985
AT1G04990
AT1G05000
AT1G05010
AT1G05020
AT1G05030
AT1G05070
AT1G05090
AT1G05100
AT1G05120
AT1G05135
AT1G05140
AT1G05150
AT1G05170
AT1G05200
AT1G05230
AT1G05240
AT1G05260
AT1G05270
AT1G05300
AT1G05350
AT1G05370
AT1G05385
AT1G05410
AT1G05420
AT1G05450
AT1G05460
AT1G05470
AT1G05490
AT1G05510
AT1G05520
AT1G05530
AT1G05550
AT1G05560
AT1G05570
AT1G05630
AT1G05640
AT1G05650
AT1G05660
AT1G05680
AT1G05710
AT1G05750
AT1G05770
AT1G05785
AT1G05800
AT1G05805
AT1G05810
AT1G05835
AT1G05840
AT1G05850
AT1G05870
AT1G05890
AT1G05900
AT1G05950
AT1G06000
AT1G06040
AT1G06070
AT1G06080
AT1G06140
AT1G06148
AT1G06160
AT1G06170
AT1G06180
AT1G06190
AT1G06270
AT1G06290
AT1G06330
AT1G06360
AT1G06370
AT1G06390
AT1G06410
AT1G06430
AT1G06460
AT1G06475
AT1G06480
AT1G06510
AT1G06520
AT1G06530
AT1G06570
AT1G06640
AT1G06680
AT1G06700
AT1G06740
AT1G06770
AT1G06790
AT1G06800
AT1G06840
AT1G06850
AT1G06923
AT1G06990
AT1G07030
AT1G07040
AT1G07080
AT1G07090
AT1G07100
AT1G07128
AT1G07135
AT1G07175
AT1G07180
AT1G07200
AT1G07220
AT1G07230
AT1G07280
AT1G07350
AT1G07390
AT1G07420
AT1G07430
AT1G07485
AT1G07500
AT1G07520
AT1G07530
AT1G07540
AT1G07570
AT1G07580
AT1G07590
AT1G07630
AT1G07640
AT1G07645
AT1G07670
AT1G07680
AT1G07700
AT1G07710
AT1G07720
AT1G07745
AT1G07760
AT1G07780
AT1G07860
AT1G07870
AT1G07885
AT1G07930
AT1G07980
AT1G08030
AT1G08060
AT1G08070
AT1G08080
AT1G08090
AT1G08100
AT1G08110
AT1G08115
AT1G08130
AT1G08165
AT1G08200
AT1G08210
AT1G08230
AT1G08290
AT1G08310
AT1G08315
AT1G08320
AT1G08370
AT1G08380
AT1G08440
AT1G08460
AT1G08465
AT1G08470
AT1G08490
AT1G08500
AT1G08510
AT1G08570
AT1G08580
AT1G08620
AT1G08630
AT1G08650
AT1G08680
AT1G08700
AT1G08720
AT1G08820
AT1G08860
AT1G08870
AT1G08910
AT1G08920
AT1G08930
AT1G08940
AT1G08980
AT1G08990
AT1G09010
AT1G09040
AT1G09050
AT1G09060
AT1G09070
AT1G09090
AT1G09130
AT1G09140
AT1G09155
AT1G09157
AT1G09160
AT1G09210
AT1G09230
AT1G09240
AT1G09250
AT1G09270
AT1G09310
AT1G09350
AT1G09380
AT1G09390
AT1G09415
AT1G09420
AT1G09440
AT1G09460
AT1G09470
AT1G09486
AT1G09490
AT1G09500
AT1G09520
AT1G09530
AT1G09540
AT1G09560
AT1G09570
AT1G09580
AT1G09630
AT1G09645
AT1G09750
AT1G09780
AT1G09795
AT1G09800
AT1G09810
AT1G09812
AT1G09850
AT1G09870
AT1G09880
AT1G09920
AT1G09930
AT1G09932
AT1G09935
AT1G09940
AT1G09960
AT1G09970
AT1G09980
AT1G09995
AT1G10020
AT1G10060
AT1G10070
AT1G10090
AT1G10095
AT1G10120
AT1G10130
AT1G10140
AT1G10170
AT1G10200
AT1G10220
AT1G10230
AT1G10270
AT1G10280
AT1G10340
AT1G10360
AT1G10380
AT1G10385
AT1G10390
AT1G10400
AT1G10410
AT1G10417
AT1G10430
AT1G10460
AT1G10470
AT1G10480
AT1G10490
AT1G10500
AT1G10520
AT1G10530
AT1G10538
AT1G10550
AT1G10580
AT1G10620
AT1G10630
AT1G10640
AT1G10650
AT1G10652
AT1G10657
AT1G10680
AT1G10682
AT1G10690
AT1G10700
AT1G10710
AT1G10717
AT1G10740
AT1G10745
AT1G10750
AT1G10770
AT1G10890
AT1G10940
AT1G10960
AT1G11040
AT1G11060
AT1G11080
AT1G11090
AT1G11112
AT1G11120
AT1G11125
AT1G11130
AT1G11160
AT1G11170
AT1G11185
AT1G11210
AT1G11220
AT1G11230
AT1G11250
AT1G11260
AT1G11280
AT1G11310
AT1G11320
AT1G11330
AT1G11350
AT1G11360
AT1G11370
AT1G11390
AT1G11460
AT1G11530
AT1G11545
AT1G11580
AT1G11590
AT1G11620
AT1G11660
AT1G11670
AT1G11680
AT1G11700
AT1G11720
AT1G11740
AT1G11790
AT1G11800
AT1G11840
AT1G11850
AT1G11905
AT1G11910
AT1G11920
AT1G11950
AT1G11960
AT1G12020
AT1G12030
AT1G12050
AT1G12060
AT1G12070
AT1G12080
AT1G12090
AT1G12100
AT1G12110
AT1G12120
AT1G12140
AT1G12180
AT1G12200
AT1G12210
AT1G12230
AT1G12240
AT1G12270
AT1G12290
AT1G12310
AT1G12320
AT1G12370
AT1G12380
AT1G12423
AT1G12430
AT1G12440
AT1G12460
AT1G12470
AT1G12490
AT1G12500
AT1G12550
AT1G12560
AT1G12580
AT1G12610
AT1G12640
AT1G12680
AT1G12710
AT1G12730
AT1G12740
AT1G12750
AT1G12780
AT1G12820
AT1G12830
AT1G12845
AT1G12900
AT1G12950
AT1G12990
AT1G13020
AT1G13040
AT1G13060
AT1G13080
AT1G13110
AT1G13140
AT1G13145
AT1G13170
AT1G13180
AT1G13190
AT1G13195
AT1G13210
AT1G13220
AT1G13230
AT1G13240
AT1G13250
AT1G13260
AT1G13280
AT1G13300
AT1G13340
AT1G13350
AT1G13360
AT1G13370
AT1G13380
AT1G13390
AT1G13430
AT1G13440
AT1G13510
AT1G13550
AT1G13560
AT1G13570
AT1G13590
AT1G13605
AT1G13620
AT1G13635
AT1G13640
AT1G13670
AT1G13690
AT1G13700
AT1G13710
AT1G13740
AT1G13750
AT1G13850
AT1G13860
AT1G13930
AT1G13940
AT1G13950
AT1G13960
AT1G13990
AT1G14000
AT1G14010
AT1G14040
AT1G14080
AT1G14090
AT1G14120
AT1G14130
AT1G14160
AT1G14170
AT1G14200
AT1G14210
AT1G14240
AT1G14260
AT1G14270
AT1G14290
AT1G14330
AT1G14340
AT1G14345
AT1G14350
AT1G14360
AT1G14370
AT1G14380
AT1G14420
AT1G14440
AT1G14460
AT1G14490
AT1G14510
AT1G14520
AT1G14530
AT1G14540
AT1G14549
AT1G14560
AT1G14570
AT1G14580
AT1G14590
AT1G14600
AT1G14620
AT1G14640
AT1G14660
AT1G14685
AT1G14687
AT1G14690
AT1G14700
AT1G14710
AT1G14740
AT1G14750
AT1G14780
AT1G14840
AT1G14860
AT1G14870
AT1G14890
AT1G14910
AT1G14920
AT1G14960
AT1G14970
AT1G14990
AT1G15020
AT1G15040
AT1G15060
AT1G15080
AT1G15090
AT1G15100
AT1G15110
AT1G15120
AT1G15125
AT1G15130
AT1G15140
AT1G15165
AT1G15175
AT1G15190
AT1G15200
AT1G15210
AT1G15220
AT1G15250
AT1G15290
AT1G15300
AT1G15310
AT1G15320
AT1G15340
AT1G15350
AT1G15360
AT1G15370
AT1G15400
AT1G15420
AT1G15460
AT1G15480
AT1G15490
AT1G15500
AT1G15510
AT1G15520
AT1G15530
AT1G15550
AT1G15570
AT1G15650
AT1G15670
AT1G15690
AT1G15740
AT1G15750
AT1G15757
AT1G15800
AT1G15820
AT1G15860
AT1G15880
AT1G15900
AT1G15930
AT1G15940
AT1G15950
AT1G15960
AT1G15970
AT1G16010
AT1G16100
AT1G16130
AT1G16150
AT1G16190
AT1G16230
AT1G16260
AT1G16300
AT1G16330
AT1G16360
AT1G16370
AT1G16410
AT1G16420
AT1G16460
AT1G16480
AT1G16490
AT1G16500
AT1G16510
AT1G16515
AT1G16530
AT1G16570
AT1G16635
AT1G16670
AT1G16705
AT1G16710
AT1G16720
AT1G16730
AT1G16750
AT1G16760
AT1G16780
AT1G16820
AT1G16840
AT1G16850
AT1G16890
AT1G16916
AT1G16920
AT1G16950
AT1G17010
AT1G17040
AT1G17060
AT1G17090
AT1G17120
AT1G17140
AT1G17147
AT1G17150
AT1G17190
AT1G17200
AT1G17210
AT1G17230
AT1G17290
AT1G17300
AT1G17340
AT1G17345
AT1G17360
AT1G17370
AT1G17380
AT1G17400
AT1G17420
AT1G17440
AT1G17450
AT1G17460
AT1G17495
AT1G17530
AT1G17550
AT1G17560
AT1G17590
AT1G17620
AT1G17650
AT1G17665
AT1G17710
AT1G17720
AT1G17744
AT1G17750
AT1G17790
AT1G17820
AT1G17830
AT1G17840
AT1G17920
AT1G17940
AT1G18100
AT1G18120
AT1G18140
AT1G18190
AT1G18191
AT1G18200
AT1G18250
AT1G18260
AT1G18270
AT1G18300
AT1G18310
AT1G18330
AT1G18350
AT1G18360
AT1G18382
AT1G18400
AT1G18410
AT1G18415
AT1G18460
AT1G18470
AT1G18500
AT1G18560
AT1G18570
AT1G18580
AT1G18610
AT1G18620
AT1G18640
AT1G18650
AT1G18670
AT1G18680
AT1G18710
AT1G18720
AT1G18735
AT1G18740
AT1G18760
AT1G18800
AT1G18820
AT1G18835
AT1G18850
AT1G18870
AT1G18879
AT1G18890
AT1G18900
AT1G18910
AT1G18940
AT1G18970
AT1G18990
AT1G19000
AT1G19010
AT1G19020
AT1G19050
AT1G19110
AT1G19180
AT1G19210
AT1G19220
AT1G19230
AT1G19240
AT1G19250
AT1G19270
AT1G19290
AT1G19300
AT1G19310
AT1G19330
AT1G19350
AT1G19373
AT1G19400
AT1G19440
AT1G19450
AT1G19460
AT1G19464
AT1G19480
AT1G19485
AT1G19490
AT1G19520
AT1G19530
AT1G19540
AT1G19570
AT1G19600
AT1G19610
AT1G19630
AT1G19640
AT1G19650
AT1G19660
AT1G19700
AT1G19720
AT1G19750
AT1G19770
AT1G19800
AT1G19810
AT1G19830
AT1G19835
AT1G19840
AT1G19850
AT1G19870
AT1G19900
AT1G19910
AT1G19920
AT1G19950
AT1G19960
AT1G19968
AT1G19970
AT1G20010
AT1G20030
AT1G20070
AT1G20090
AT1G20100
AT1G20170
AT1G20200
AT1G20220
AT1G20225
AT1G20250
AT1G20270
AT1G20310
AT1G20330
AT1G20340
AT1G20370
AT1G20375
AT1G20380
AT1G20410
AT1G20440
AT1G20450
AT1G20480
AT1G20500
AT1G20520
AT1G20540
AT1G20560
AT1G20575
AT1G20620
AT1G20630
AT1G20640
AT1G20650
AT1G20657
AT1G20670
AT1G20691
AT1G20696
AT1G20790
AT1G20816
AT1G20820
AT1G20823
AT1G20840
AT1G20850
AT1G20860
AT1G20875
AT1G20880
AT1G20890
AT1G20900
AT1G20925
AT1G20940
AT1G20967
AT1G20970
AT1G20980
AT1G20990
AT1G21000
AT1G21010
AT1G21020
AT1G21050
AT1G21070
AT1G21080
AT1G21100
AT1G21130
AT1G21140
AT1G21250
AT1G21280
AT1G21290
AT1G21310
AT1G21320
AT1G21326
AT1G21327
AT1G21360
AT1G21370
AT1G21380
AT1G21400
AT1G21410
AT1G21440
AT1G21450
AT1G21475
AT1G21520
AT1G21525
AT1G21540
AT1G21560
AT1G21590
AT1G21640
AT1G21650
AT1G21660
AT1G21670
AT1G21695
AT1G21730
AT1G21738
AT1G21750
AT1G21790
AT1G21830
AT1G21835
AT1G21850
AT1G21880
AT1G21900
AT1G21910
AT1G21920
AT1G21940
AT1G21950
AT1G21970
AT1G21975
AT1G21980
AT1G21990
AT1G22030
AT1G22040
AT1G22050
AT1G22060
AT1G22070
AT1G22100
AT1G22170
AT1G22180
AT1G22190
AT1G22220
AT1G22230
AT1G22250
AT1G22260
AT1G22310
AT1G22400
AT1G22403
AT1G22410
AT1G22430
AT1G22440
AT1G22460
AT1G22470
AT1G22490
AT1G22510
AT1G22520
AT1G22530
AT1G22540
AT1G22570
AT1G22600
AT1G22610
AT1G22640
AT1G22650
AT1G22710
AT1G22720
AT1G22767
AT1G22790
AT1G22800
AT1G22810
AT1G22870
AT1G22882
AT1G22900
AT1G22920
AT1G22930
AT1G22940
AT1G22990
AT1G23000
AT1G23020
AT1G23030
AT1G23040
AT1G23050
AT1G23060
AT1G23074
AT1G23080
AT1G23090
AT1G23100
AT1G23110
AT1G23140
AT1G23145
AT1G23149
AT1G23170
AT1G23200
AT1G23201
AT1G23205
AT1G23220
AT1G23300
AT1G23310
AT1G23330
AT1G23360
AT1G23380
AT1G23390
AT1G23440
AT1G23450
AT1G23490
AT1G23560
AT1G23710
AT1G23820
AT1G23860
AT1G23870
AT1G23890
AT1G23960
AT1G23980
AT1G23990
AT1G24010
AT1G24080
AT1G24095
AT1G24120
AT1G24130
AT1G24145
AT1G24147
AT1G24148
AT1G24150
AT1G24170
AT1G24180
AT1G24260
AT1G24265
AT1G24267
AT1G24350
AT1G24405
AT1G24440
AT1G24480
AT1G24530
AT1G24540
AT1G24575
AT1G24580
AT1G24600
AT1G24620
AT1G24625
AT1G24733
AT1G25220
AT1G25250
AT1G25260
AT1G25275
AT1G25280
AT1G25310
AT1G25320
AT1G25340
AT1G25350
AT1G25370
AT1G25390
AT1G25410
AT1G25420
AT1G25425
AT1G25440
AT1G25460
AT1G25480
AT1G25500
AT1G25520
AT1G25530
AT1G25560
AT1G25570
AT1G25580
AT1G26090
AT1G26100
AT1G26130
AT1G26150
AT1G26160
AT1G26208
AT1G26230
AT1G26260
AT1G26270
AT1G26290
AT1G26380
AT1G26410
AT1G26420
AT1G26550
AT1G26558
AT1G26560
AT1G26570
AT1G26590
AT1G26600
AT1G26620
AT1G26660
AT1G26670
AT1G26690
AT1G26720
AT1G26730
AT1G26762
AT1G26770
AT1G26773
AT1G26790
AT1G26800
AT1G26810
AT1G26830
AT1G26900
AT1G26916
AT1G26920
AT1G26930
AT1G26940
AT1G26945
AT1G26950
AT1G26960
AT1G26970
AT1G27000
AT1G27030
AT1G27050
AT1G27070
AT1G27090
AT1G27100
AT1G27120
AT1G27130
AT1G27170
AT1G27200
AT1G27210
AT1G27213
AT1G27290
AT1G27320
AT1G27330
AT1G27350
AT1G27360
AT1G27370
AT1G27440
AT1G27460
AT1G27470
AT1G27500
AT1G27510
AT1G27540
AT1G27600
AT1G27630
AT1G27640
AT1G27650
AT1G27660
AT1G27690
AT1G27750
AT1G27760
AT1G27840
AT1G27930
AT1G27980
AT1G28007
AT1G28050
AT1G28070
AT1G28080
AT1G28100
AT1G28110
AT1G28130
AT1G28135
AT1G28170
AT1G28180
AT1G28190
AT1G28200
AT1G28230
AT1G28260
AT1G28280
AT1G28310
AT1G28320
AT1G28330
AT1G28340
AT1G28360
AT1G28370
AT1G28375
AT1G28380
AT1G28395
AT1G28400
AT1G28410
AT1G28430
AT1G28440
AT1G28447
AT1G28480
AT1G28520
AT1G28530
AT1G28580
AT1G28591
AT1G28600
AT1G28610
AT1G28620
AT1G28640
AT1G28650
AT1G28680
AT1G28690
AT1G28760
AT1G28960
AT1G29050
AT1G29060
AT1G29100
AT1G29120
AT1G29150
AT1G29160
AT1G29170
AT1G29230
AT1G29240
AT1G29270
AT1G29280
AT1G29290
AT1G29300
AT1G29330
AT1G29340
AT1G29390
AT1G29400
AT1G29410
AT1G29418
AT1G29600
AT1G29640
AT1G29660
AT1G29670
AT1G29680
AT1G29690
AT1G29715
AT1G29720
AT1G29760
AT1G29785
AT1G29810
AT1G29850
AT1G29870
AT1G29880
AT1G29900
AT1G29920
AT1G29930
AT1G29980
AT1G30016
AT1G30020
AT1G30040
AT1G30050
AT1G30070
AT1G30100
AT1G30110
AT1G30120
AT1G30130
AT1G30135
AT1G30190
AT1G30200
AT1G30210
AT1G30250
AT1G30260
AT1G30270
AT1G30280
AT1G30290
AT1G30310
AT1G30320
AT1G30330
AT1G30340
AT1G30350
AT1G30360
AT1G30370
AT1G30400
AT1G30410
AT1G30440
AT1G30475
AT1G30490
AT1G30500
AT1G30530
AT1G30570
AT1G30590
AT1G30600
AT1G30610
AT1G30620
AT1G30650
AT1G30660
AT1G30690
AT1G30700
AT1G30720
AT1G30757
AT1G30780
AT1G30820
AT1G30825
AT1G30835
AT1G30840
AT1G30860
AT1G30900
AT1G31010
AT1G31030
AT1G31040
AT1G31070
AT1G31120
AT1G31130
AT1G31150
AT1G31170
AT1G31173
AT1G31258
AT1G31310
AT1G31320
AT1G31330
AT1G31350
AT1G31355
AT1G31358
AT1G31410
AT1G31450
AT1G31470
AT1G31540
AT1G31550
AT1G31580
AT1G31710
AT1G31720
AT1G31730
AT1G31760
AT1G31790
AT1G31830
AT1G31835
AT1G31850
AT1G31860
AT1G31880
AT1G31910
AT1G31920
AT1G31940
AT1G32045
AT1G32049
AT1G32060
AT1G32090
AT1G32100
AT1G32120
AT1G32170
AT1G32190
AT1G32200
AT1G32230
AT1G32240
AT1G32290
AT1G32340
AT1G32350
AT1G32360
AT1G32400
AT1G32410
AT1G32415
AT1G32450
AT1G32460
AT1G32530
AT1G32540
AT1G32550
AT1G32610
AT1G32640
AT1G32650
AT1G32670
AT1G32690
AT1G32700
AT1G32710
AT1G32730
AT1G32740
AT1G32770
AT1G32780
AT1G32860
AT1G32890
AT1G32900
AT1G32928
AT1G32940
AT1G33060
AT1G33102
AT1G33110
AT1G33230
AT1G33240
AT1G33250
AT1G33260
AT1G33270
AT1G33280
AT1G33350
AT1G33370
AT1G33420
AT1G33560
AT1G33590
AT1G33600
AT1G33607
AT1G33610
AT1G33680
AT1G33700
AT1G33730
AT1G33750
AT1G33760
AT1G33780
AT1G33811
AT1G33960
AT1G33970
AT1G33990
AT1G34030
AT1G34140
AT1G34160
AT1G34210
AT1G34245
AT1G34315
AT1G34320
AT1G34360
AT1G34370
AT1G34418
AT1G34430
AT1G34540
AT1G34550
AT1G34580
AT1G34630
AT1G34640
AT1G34670
AT1G35110
AT1G35140
AT1G35160
AT1G35190
AT1G35210
AT1G35220
AT1G35250
AT1G35255
AT1G35333
AT1G35350
AT1G35430
AT1G35460
AT1G35465
AT1G35510
AT1G35513
AT1G35516
AT1G35560
AT1G35670
AT1G35750
AT1G35780
AT1G35830
AT1G35910
AT1G36060
AT1G36070
AT1G36160
AT1G36220
AT1G36370
AT1G36936
AT1G37120
AT1G37130
AT1G37140
AT1G38140
AT1G41830
AT1G42550
AT1G42960
AT1G42970
AT1G42990
AT1G43160
AT1G43580
AT1G43600
AT1G43630
AT1G43670
AT1G43850
AT1G43886
AT1G43980
AT1G44000
AT1G44100
AT1G44170
AT1G44350
AT1G44575
AT1G44750
AT1G44760
AT1G44790
AT1G44800
AT1G44830
AT1G44890
AT1G44940
AT1G45000
AT1G45010
AT1G45050
AT1G45130
AT1G45145
AT1G45160
AT1G45201
AT1G45207
AT1G45248
AT1G45688
AT1G46264
AT1G46408
AT1G46480
AT1G46554
AT1G46768
AT1G47056
AT1G47128
AT1G47200
AT1G47240
AT1G47310
AT1G47330
AT1G47370
AT1G47480
AT1G47490
AT1G47497
AT1G47510
AT1G47520
AT1G47530
AT1G47540
AT1G47560
AT1G47570
AT1G47578
AT1G47590
AT1G47600
AT1G47610
AT1G47720
AT1G47740
AT1G47750
AT1G47840
AT1G47860
AT1G47890
AT1G47970
AT1G47990
AT1G48000
AT1G48050
AT1G48100
AT1G48110
AT1G48200
AT1G48230
AT1G48260
AT1G48267
AT1G48280
AT1G48300
AT1G48320
AT1G48370
AT1G48410
AT1G48480
AT1G48490
AT1G48510
AT1G48580
AT1G48598
AT1G48610
AT1G48620
AT1G48650
AT1G48745
AT1G48790
AT1G48830
AT1G48870
AT1G48880
AT1G48953
AT1G48990
AT1G49000
AT1G49005
AT1G49010
AT1G49050
AT1G49130
AT1G49160
AT1G49170
AT1G49200
AT1G49240
AT1G49320
AT1G49330
AT1G49430
AT1G49435
AT1G49450
AT1G49500
AT1G49520
AT1G49540
AT1G49580
AT1G49600
AT1G49610
AT1G49620
AT1G49730
AT1G49750
AT1G49760
AT1G49780
AT1G49820
AT1G49840
AT1G49850
AT1G49870
AT1G49890
AT1G49950
AT1G50020
AT1G50040
AT1G50055
AT1G50100
AT1G50110
AT1G50200
AT1G50290
AT1G50320
AT1G50370
AT1G50420
AT1G50430
AT1G50450
AT1G50460
AT1G50570
AT1G50575
AT1G50600
AT1G50630
AT1G50650
AT1G50740
AT1G50954
AT1G50990
AT1G51090
AT1G51130
AT1G51140
AT1G51160
AT1G51170
AT1G51175
AT1G51190
AT1G51220
AT1G51270
AT1G51300
AT1G51310
AT1G51355
AT1G51390
AT1G51400
AT1G51460
AT1G51470
AT1G51480
AT1G51510
AT1G51530
AT1G51550
AT1G51610
AT1G51660
AT1G51680
AT1G51690
AT1G51700
AT1G51710
AT1G51760
AT1G51780
AT1G51790
AT1G51800
AT1G51805
AT1G51840
AT1G51850
AT1G51860
AT1G51940
AT1G51950
AT1G52080
AT1G52110
AT1G52120
AT1G52140
AT1G52150
AT1G52190
AT1G52200
AT1G52240
AT1G52280
AT1G52290
AT1G52300
AT1G52330
AT1G52340
AT1G52347
AT1G52360
AT1G52410
AT1G52430
AT1G52565
AT1G52590
AT1G52750
AT1G52760
AT1G52780
AT1G52800
AT1G52857
AT1G52870
AT1G52880
AT1G52890
AT1G52905
AT1G52960
AT1G53040
AT1G53050
AT1G53060
AT1G53080
AT1G53110
AT1G53130
AT1G53160
AT1G53163
AT1G53170
AT1G53210
AT1G53220
AT1G53230
AT1G53233
AT1G53290
AT1G53300
AT1G53310
AT1G53320
AT1G53380
AT1G53400
AT1G53430
AT1G53460
AT1G53470
AT1G53510
AT1G53560
AT1G53570
AT1G53580
AT1G53600
AT1G53610
AT1G53620
AT1G53625
AT1G53645
AT1G53683
AT1G53690
AT1G53700
AT1G53730
AT1G53760
AT1G53770
AT1G53820
AT1G53840
AT1G53850
AT1G53920
AT1G53980
AT1G53990
AT1G54000
AT1G54010
AT1G54020
AT1G54030
AT1G54035
AT1G54070
AT1G54090
AT1G54095
AT1G54100
AT1G54120
AT1G54130
AT1G54160
AT1G54180
AT1G54200
AT1G54210
AT1G54270
AT1G54320
AT1G54340
AT1G54450
AT1G54460
AT1G54530
AT1G54575
AT1G54580
AT1G54670
AT1G54690
AT1G54710
AT1G54740
AT1G54820
AT1G54840
AT1G54890
AT1G54940
AT1G54970
AT1G55000
AT1G55010
AT1G55020
AT1G55100
AT1G55110
AT1G55120
AT1G55140
AT1G55152
AT1G55190
AT1G55205
AT1G55210
AT1G55240
AT1G55260
AT1G55265
AT1G55270
AT1G55280
AT1G55300
AT1G55330
AT1G55340
AT1G55350
AT1G55360
AT1G55365
AT1G55410
AT1G55420
AT1G55440
AT1G55450
AT1G55480
AT1G55520
AT1G55546
AT1G55550
AT1G55580
AT1G55590
AT1G55604
AT1G55610
AT1G55615
AT1G55660
AT1G55690
AT1G55700
AT1G55740
AT1G55750
AT1G55760
AT1G55790
AT1G55810
AT1G55820
AT1G55830
AT1G55840
AT1G55850
AT1G55860
AT1G55880
AT1G55910
AT1G55920
AT1G55980
AT1G56000
AT1G56010
AT1G56020
AT1G56030
AT1G56040
AT1G56070
AT1G56080
AT1G56120
AT1G56130
AT1G56140
AT1G56145
AT1G56150
AT1G56180
AT1G56200
AT1G56210
AT1G56220
AT1G56230
AT1G56233
AT1G56240
AT1G56250
AT1G56300
AT1G56330
AT1G56340
AT1G56430
AT1G56500
AT1G56510
AT1G56520
AT1G56540
AT1G56550
AT1G56580
AT1G56590
AT1G56600
AT1G56630
AT1G56640
AT1G56650
AT1G56690
AT1G56700
AT1G56720
AT1G57550
AT1G57560
AT1G57610
AT1G57620
AT1G57630
AT1G57680
AT1G57720
AT1G57770
AT1G57820
AT1G57840
AT1G57850
AT1G57870
AT1G57980
AT1G57990
AT1G58030
AT1G58080
AT1G58100
AT1G58160
AT1G58170
AT1G58180
AT1G58200
AT1G58225
AT1G58250
AT1G58265
AT1G58270
AT1G58280
AT1G58290
AT1G58330
AT1G58340
AT1G58350
AT1G58360
AT1G58400
AT1G58410
AT1G58420
AT1G58440
AT1G58460
AT1G58470
AT1G58520
AT1G58602
AT1G59530
AT1G59560
AT1G59590
AT1G59620
AT1G59630
AT1G59640
AT1G59650
AT1G59700
AT1G59710
AT1G59730
AT1G59740
AT1G59750
AT1G59820
AT1G59860
AT1G59870
AT1G59900
AT1G59910
AT1G59940
AT1G59950
AT1G59960
AT1G59980
AT1G60010
AT1G60025
AT1G60050
AT1G60060
AT1G60090
AT1G60110
AT1G60140
AT1G60150
AT1G60190
AT1G60270
AT1G60440
AT1G60510
AT1G60525
AT1G60550
AT1G60590
AT1G60600
AT1G60630
AT1G60660
AT1G60690
AT1G60710
AT1G60730
AT1G60790
AT1G60820
AT1G60870
AT1G60890
AT1G60900
AT1G60940
AT1G60950
AT1G60960
AT1G60970
AT1G60989
AT1G60995
AT1G61010
AT1G61050
AT1G61100
AT1G61110
AT1G61120
AT1G61130
AT1G61170
AT1G61190
AT1G61215
AT1G61224
AT1G61255
AT1G61260
AT1G61275
AT1G61340
AT1G61350
AT1G61353
AT1G61360
AT1G61370
AT1G61380
AT1G61420
AT1G61460
AT1G61560
AT1G61610
AT1G61650
AT1G61660
AT1G61667
AT1G61740
AT1G61780
AT1G61800
AT1G61810
AT1G61820
AT1G61850
AT1G61870
AT1G61890
AT1G61900
AT1G61930
AT1G62010
AT1G62030
AT1G62040
AT1G62045
AT1G62050
AT1G62180
AT1G62200
AT1G62290
AT1G62300
AT1G62301
AT1G62305
AT1G62310
AT1G62330
AT1G62370
AT1G62380
AT1G62420
[truncated: 8,579 more rows]

## Sheet: VAL2 FUS3-GR overlap genes
AT1G01020
AT1G01030
AT1G01040
AT1G01050
AT1G01060
AT1G01070
AT1G01120
AT1G01130
AT1G01140
AT1G01180
AT1G01183
AT1G01190
AT1G01225
AT1G01240
AT1G01250
AT1G01260
AT1G01300
AT1G01310
AT1G01320
AT1G01360
AT1G01380
AT1G01390
AT1G01420
AT1G01430
AT1G01440
AT1G01453
AT1G01480
AT1G01490
AT1G01540
AT1G01550
AT1G01570
AT1G01580
AT1G01600
AT1G01610
AT1G01620
AT1G01650
AT1G01670
AT1G01720
AT1G01760
AT1G01800
AT1G01830
AT1G01860
AT1G01890
AT1G01910
AT1G01950
AT1G01990
AT1G02030
AT1G02040
AT1G02065
AT1G02070
AT1G02170
AT1G02180
AT1G02205
AT1G02210
AT1G02220
AT1G02228
AT1G02230
AT1G02250
AT1G02300
AT1G02305
AT1G02310
AT1G02335
AT1G02340
AT1G02360
AT1G02380
AT1G02390
AT1G02391
AT1G02400
AT1G02450
AT1G02460
AT1G02475
AT1G02560
AT1G02610
AT1G02630
AT1G02640
AT1G02650
AT1G02660
AT1G02700
AT1G02720
AT1G02770
AT1G02810
AT1G02850
AT1G02860
AT1G02880
AT1G02890
AT1G02900
AT1G03000
AT1G03030
AT1G03040
AT1G03080
AT1G03106
AT1G03120
AT1G03130
AT1G03160
AT1G03170
AT1G03200
AT1G03220
AT1G03250
AT1G03290
AT1G03365
AT1G03370
AT1G03410
AT1G03440
AT1G03457
AT1G03470
AT1G03510
AT1G03520
AT1G03550
AT1G03590
AT1G03710
AT1G03720
AT1G03730
AT1G03743
AT1G03800
AT1G03840
AT1G03850
AT1G03880
AT1G03905
AT1G03930
AT1G03970
AT1G03980
AT1G03990
AT1G04000
AT1G04010
AT1G04030
AT1G04040
AT1G04100
AT1G04120
AT1G04150
AT1G04171
AT1G04180
AT1G04210
AT1G04220
AT1G04240
AT1G04250
AT1G04260
AT1G04270
AT1G04300
AT1G04310
AT1G04320
AT1G04330
AT1G04350
AT1G04370
AT1G04400
AT1G04410
AT1G04430
AT1G04440
AT1G04490
AT1G04520
AT1G04530
AT1G04550
AT1G04570
AT1G04610
AT1G04650
AT1G04670
AT1G04680
AT1G04684
AT1G04690
AT1G04710
AT1G04770
AT1G04780
AT1G04820
AT1G04920
AT1G04960
AT1G04985
AT1G04990
AT1G05000
AT1G05010
AT1G05070
AT1G05090
AT1G05100
AT1G05120
AT1G05135
AT1G05140
AT1G05150
AT1G05170
AT1G05200
AT1G05230
AT1G05240
AT1G05260
AT1G05270
AT1G05300
AT1G05350
AT1G05370
AT1G05380
AT1G05385
AT1G05410
AT1G05420
AT1G05460
AT1G05470
AT1G05490
AT1G05520
AT1G05530
AT1G05550
AT1G05560
AT1G05570
AT1G05630
AT1G05640
AT1G05650
AT1G05680
AT1G05710
AT1G05750
AT1G05785
AT1G05800
AT1G05805
AT1G05810
AT1G05835
AT1G05840
AT1G05850
AT1G05870
AT1G05950
AT1G06000
AT1G06040
AT1G06070
AT1G06080
AT1G06148
AT1G06160
AT1G06170
AT1G06180
AT1G06270
AT1G06290
AT1G06330
AT1G06360
AT1G06370
AT1G06390
AT1G06400
AT1G06410
AT1G06460
AT1G06475
AT1G06480
AT1G06510
AT1G06520
AT1G06530
AT1G06570
AT1G06640
AT1G06680
AT1G06700
AT1G06740
AT1G06770
AT1G06780
AT1G06800
AT1G06840
AT1G06850
AT1G06923
AT1G06990
AT1G07030
AT1G07040
AT1G07090
AT1G07100
AT1G07128
AT1G07135
AT1G07175
AT1G07180
AT1G07200
AT1G07220
AT1G07230
AT1G07280
AT1G07350
AT1G07390
AT1G07420
AT1G07430
AT1G07485
AT1G07500
AT1G07520
AT1G07530
AT1G07540
AT1G07570
AT1G07580
AT1G07590
AT1G07630
AT1G07640
AT1G07645
AT1G07670
AT1G07710
AT1G07720
AT1G07760
AT1G07780
AT1G07870
AT1G07885
AT1G07930
AT1G07980
AT1G08030
AT1G08080
AT1G08090
AT1G08100
AT1G08115
AT1G08130
AT1G08165
AT1G08200
AT1G08210
AT1G08230
AT1G08290
AT1G08310
AT1G08315
AT1G08320
AT1G08380
AT1G08440
AT1G08470
AT1G08490
AT1G08500
AT1G08510
AT1G08570
AT1G08630
AT1G08680
AT1G08720
AT1G08800
AT1G08820
AT1G08860
AT1G08870
AT1G08910
AT1G08920
AT1G08930
AT1G08940
AT1G08990
AT1G09010
AT1G09040
AT1G09070
AT1G09090
AT1G09130
AT1G09155
AT1G09160
AT1G09210
AT1G09230
AT1G09240
AT1G09250
AT1G09270
AT1G09310
AT1G09350
AT1G09380
AT1G09390
AT1G09415
AT1G09420
AT1G09440
AT1G09460
AT1G09470
AT1G09490
AT1G09500
AT1G09520
AT1G09530
AT1G09540
AT1G09560
AT1G09570
AT1G09580
AT1G09630
AT1G09645
AT1G09750
AT1G09780
AT1G09800
AT1G09810
AT1G09812
AT1G09880
AT1G09920
AT1G09935
AT1G09940
AT1G09970
AT1G09980
AT1G09995
AT1G10020
AT1G10060
AT1G10070
AT1G10090
AT1G10120
AT1G10130
AT1G10140
AT1G10170
AT1G10200
AT1G10220
AT1G10230
AT1G10270
AT1G10280
AT1G10340
AT1G10360
AT1G10380
AT1G10385
AT1G10390
AT1G10400
AT1G10410
AT1G10417
AT1G10430
AT1G10460
AT1G10470
AT1G10480
AT1G10490
AT1G10500
AT1G10530
AT1G10550
AT1G10640
AT1G10650
AT1G10652
AT1G10657
AT1G10660
AT1G10682
AT1G10690
AT1G10700
AT1G10710
AT1G10740
AT1G10745
AT1G10747
AT1G10750
AT1G10890
AT1G10940
AT1G10960
AT1G11040
AT1G11060
AT1G11080
AT1G11090
AT1G11112
AT1G11120
AT1G11125
AT1G11130
AT1G11160
AT1G11170
AT1G11185
AT1G11210
AT1G11220
AT1G11230
AT1G11250
AT1G11260
AT1G11280
AT1G11310
AT1G11320
AT1G11330
AT1G11370
AT1G11390
AT1G11460
AT1G11530
AT1G11545
AT1G11580
AT1G11590
AT1G11660
AT1G11670
AT1G11680
AT1G11700
AT1G11720
AT1G11740
AT1G11790
AT1G11840
AT1G11850
AT1G11910
AT1G11920
AT1G11950
AT1G11960
AT1G12020
AT1G12030
AT1G12060
AT1G12070
AT1G12080
AT1G12090
AT1G12100
AT1G12110
AT1G12120
AT1G12140
AT1G12190
AT1G12200
AT1G12210
AT1G12240
AT1G12270
AT1G12290
AT1G12320
AT1G12370
AT1G12380
AT1G12423
AT1G12430
AT1G12440
AT1G12460
AT1G12490
AT1G12500
AT1G12550
AT1G12560
AT1G12580
AT1G12610
AT1G12640
AT1G12710
AT1G12740
AT1G12750
AT1G12780
AT1G12820
AT1G12845
AT1G12950
AT1G12990
AT1G13020
AT1G13080
AT1G13110
AT1G13145
AT1G13180
AT1G13195
AT1G13210
AT1G13240
AT1G13245
AT1G13250
AT1G13260
AT1G13280
AT1G13300
AT1G13340
AT1G13360
AT1G13370
AT1G13380
AT1G13390
AT1G13430
AT1G13440
AT1G13510
AT1G13550
AT1G13560
AT1G13570
AT1G13590
AT1G13605
AT1G13635
AT1G13640
AT1G13670
AT1G13690
AT1G13700
AT1G13710
AT1G13740
AT1G13750
AT1G13860
AT1G13930
AT1G13940
AT1G13950
AT1G13960
AT1G13990
AT1G14000
AT1G14010
AT1G14040
AT1G14080
AT1G14090
AT1G14120
AT1G14130
AT1G14170
AT1G14200
AT1G14210
AT1G14240
AT1G14260
AT1G14270
AT1G14290
AT1G14330
AT1G14340
AT1G14345
AT1G14350
AT1G14360
AT1G14370
AT1G14380
AT1G14390
AT1G14430
AT1G14440
AT1G14460
AT1G14490
AT1G14510
AT1G14520
AT1G14530
AT1G14540
AT1G14549
AT1G14560
AT1G14570
AT1G14580
AT1G14590
AT1G14600
AT1G14620
AT1G14640
AT1G14660
AT1G14685
AT1G14687
AT1G14690
AT1G14700
AT1G14710
AT1G14720
AT1G14740
AT1G14750
AT1G14780
AT1G14840
AT1G14860
AT1G14870
AT1G14890
AT1G14900
AT1G14920
AT1G14960
AT1G14970
AT1G14990
AT1G15020
AT1G15040
AT1G15060
AT1G15080
AT1G15090
AT1G15100
AT1G15110
AT1G15120
AT1G15125
AT1G15140
AT1G15165
AT1G15175
AT1G15190
AT1G15210
AT1G15220
AT1G15250
AT1G15290
AT1G15300
AT1G15340
AT1G15350
AT1G15360
AT1G15370
AT1G15400
AT1G15420
AT1G15460
AT1G15480
AT1G15490
AT1G15520
AT1G15530
AT1G15550
AT1G15570
AT1G15670
AT1G15690
AT1G15740
AT1G15750
AT1G15757
AT1G15800
AT1G15820
AT1G15860
AT1G15880
AT1G15940
AT1G15950
AT1G15960
AT1G15970
AT1G16010
AT1G16100
AT1G16130
AT1G16150
AT1G16190
AT1G16260
AT1G16300
AT1G16360
AT1G16370
AT1G16410
AT1G16460
AT1G16490
AT1G16500
AT1G16510
AT1G16515
AT1G16530
AT1G16660
AT1G16670
AT1G16705
AT1G16720
AT1G16730
AT1G16750
AT1G16820
AT1G16840
AT1G16850
AT1G16890
AT1G16916
AT1G16920
AT1G16950
AT1G17040
AT1G17060
AT1G17090
AT1G17110
AT1G17140
AT1G17147
AT1G17150
AT1G17180
AT1G17190
AT1G17200
AT1G17210
AT1G17230
AT1G17290
AT1G17300
AT1G17340
AT1G17345
AT1G17360
AT1G17370
AT1G17380
AT1G17400
AT1G17420
AT1G17430
AT1G17440
AT1G17450
AT1G17460
AT1G17495
AT1G17530
AT1G17550
AT1G17560
AT1G17590
AT1G17620
AT1G17665
AT1G17710
AT1G17720
AT1G17744
AT1G17750
AT1G17830
AT1G17920
AT1G17940
AT1G18100
AT1G18120
AT1G18140
AT1G18180
AT1G18190
AT1G18191
AT1G18200
AT1G18250
AT1G18260
AT1G18270
AT1G18300
AT1G18330
AT1G18350
AT1G18360
AT1G18382
AT1G18400
AT1G18410
AT1G18415
AT1G18460
AT1G18470
AT1G18500
AT1G18560
AT1G18570
AT1G18580
AT1G18610
AT1G18620
AT1G18640
AT1G18670
AT1G18710
AT1G18720
AT1G18735
AT1G18740
AT1G18800
AT1G18820
AT1G18835
AT1G18850
AT1G18870
AT1G18890
AT1G18900
AT1G18910
AT1G18940
AT1G18970
AT1G18990
AT1G19000
AT1G19010
AT1G19020
AT1G19050
AT1G19110
AT1G19180
AT1G19220
AT1G19230
AT1G19240
AT1G19250
AT1G19270
AT1G19290
AT1G19300
AT1G19310
AT1G19330
AT1G19350
AT1G19400
AT1G19440
AT1G19450
AT1G19460
AT1G19480
AT1G19485
AT1G19490
AT1G19530
AT1G19540
AT1G19570
AT1G19600
AT1G19610
AT1G19630
AT1G19640
AT1G19650
AT1G19660
AT1G19700
AT1G19720
AT1G19730
AT1G19750
AT1G19770
AT1G19800
AT1G19830
AT1G19835
AT1G19840
AT1G19850
AT1G19870
AT1G19910
AT1G19920
AT1G19950
AT1G19960
AT1G19968
AT1G19970
AT1G20010
AT1G20030
AT1G20070
AT1G20090
AT1G20100
AT1G20170
AT1G20200
AT1G20220
AT1G20250
AT1G20270
AT1G20310
AT1G20330
AT1G20340
AT1G20370
AT1G20375
AT1G20380
AT1G20410
AT1G20440
AT1G20450
AT1G20480
AT1G20500
AT1G20540
AT1G20560
AT1G20575
AT1G20620
AT1G20630
AT1G20640
AT1G20650
AT1G20657
AT1G20670
AT1G20691
AT1G20696
AT1G20816
AT1G20820
AT1G20823
AT1G20840
AT1G20850
AT1G20860
AT1G20880
AT1G20890
AT1G20900
AT1G20967
AT1G20980
AT1G20990
AT1G21000
AT1G21010
AT1G21020
AT1G21050
AT1G21070
AT1G21080
AT1G21100
AT1G21130
AT1G21140
AT1G21250
AT1G21290
AT1G21310
AT1G21320
AT1G21326
AT1G21360
AT1G21370
AT1G21380
AT1G21400
AT1G21410
AT1G21450
AT1G21475
AT1G21520
AT1G21525
AT1G21540
AT1G21590
AT1G21640
AT1G21660
AT1G21670
AT1G21695
AT1G21730
AT1G21738
AT1G21750
AT1G21790
AT1G21830
AT1G21880
AT1G21900
AT1G21910
AT1G21920
AT1G21950
AT1G21975
AT1G21980
AT1G21990
AT1G22030
AT1G22040
AT1G22050
AT1G22060
AT1G22070
AT1G22100
AT1G22170
AT1G22180
AT1G22190
AT1G22220
AT1G22230
AT1G22250
AT1G22260
AT1G22310
AT1G22360
AT1G22400
AT1G22403
AT1G22410
AT1G22430
AT1G22440
AT1G22460
AT1G22470
AT1G22490
AT1G22510
AT1G22520
AT1G22530
AT1G22540
AT1G22570
AT1G22600
AT1G22610
AT1G22640
AT1G22650
AT1G22690
AT1G22710
AT1G22720
AT1G22767
AT1G22790
AT1G22810
AT1G22882
AT1G22900
AT1G22910
AT1G22920
AT1G22930
AT1G22990
AT1G23000
AT1G23020
AT1G23030
AT1G23040
AT1G23050
AT1G23060
AT1G23074
AT1G23080
AT1G23090
AT1G23100
AT1G23110
AT1G23140
AT1G23149
AT1G23170
AT1G23205
AT1G23220
AT1G23310
AT1G23330
AT1G23360
AT1G23380
AT1G23390
AT1G23440
AT1G23490
AT1G23560
AT1G23710
AT1G23820
AT1G23860
AT1G23890
AT1G23910
AT1G23960
AT1G23980
AT1G23990
AT1G24000
AT1G24080
AT1G24095
AT1G24120
AT1G24130
AT1G24145
AT1G24147
AT1G24148
AT1G24150
AT1G24170
AT1G24180
AT1G24260
AT1G24265
AT1G24350
AT1G24405
AT1G24440
AT1G24460
AT1G24480
AT1G24530
AT1G24540
AT1G24575
AT1G24600
AT1G24620
AT1G24625
AT1G25220
AT1G25230
AT1G25240
AT1G25250
AT1G25260
AT1G25275
AT1G25280
AT1G25310
AT1G25320
AT1G25340
AT1G25350
AT1G25370
AT1G25390
AT1G25410
AT1G25420
AT1G25425
AT1G25440
AT1G25460
AT1G25480
AT1G25500
AT1G25530
AT1G25560
AT1G25570
AT1G25580
AT1G26090
AT1G26100
AT1G26150
AT1G26208
AT1G26230
AT1G26260
AT1G26270
AT1G26290
AT1G26380
AT1G26410
AT1G26420
AT1G26558
AT1G26560
AT1G26570
AT1G26580
AT1G26590
AT1G26600
AT1G26620
AT1G26690
AT1G26720
AT1G26730
AT1G26770
AT1G26773
AT1G26790
AT1G26800
AT1G26900
AT1G26916
AT1G26920
AT1G26930
AT1G26940
AT1G26945
AT1G26950
AT1G26970
AT1G27000
AT1G27030
AT1G27050
AT1G27070
AT1G27100
AT1G27120
AT1G27130
AT1G27170
AT1G27200
AT1G27210
AT1G27290
AT1G27330
AT1G27350
AT1G27360
AT1G27370
AT1G27440
AT1G27460
AT1G27470
AT1G27510
AT1G27540
AT1G27600
AT1G27630
AT1G27640
AT1G27650
AT1G27660
AT1G27690
AT1G27740
AT1G27750
AT1G27760
AT1G27840
AT1G27930
AT1G27950
AT1G27980
AT1G28007
AT1G28050
AT1G28070
AT1G28080
AT1G28100
AT1G28110
AT1G28120
AT1G28130
AT1G28135
AT1G28170
AT1G28180
AT1G28190
AT1G28200
AT1G28230
AT1G28260
AT1G28280
AT1G28310
AT1G28320
AT1G28330
AT1G28340
AT1G28360
AT1G28370
AT1G28375
AT1G28380
AT1G28395
AT1G28400
AT1G28410
AT1G28430
AT1G28440
AT1G28447
AT1G28480
AT1G28580
AT1G28591
AT1G28600
AT1G28610
AT1G28620
AT1G28630
AT1G28640
AT1G28650
AT1G28670
AT1G28690
AT1G28760
AT1G28960
AT1G29050
AT1G29060
AT1G29120
AT1G29150
AT1G29160
AT1G29170
AT1G29230
AT1G29240
AT1G29270
AT1G29280
AT1G29290
AT1G29300
AT1G29330
AT1G29340
AT1G29390
AT1G29400
AT1G29600
AT1G29640
AT1G29650
AT1G29660
AT1G29670
AT1G29680
AT1G29690
AT1G29760
AT1G29810
AT1G29850
AT1G29880
AT1G29900
AT1G29920
AT1G29930
AT1G29980
AT1G30016
AT1G30020
AT1G30040
AT1G30050
AT1G30100
AT1G30110
AT1G30120
AT1G30135
AT1G30190
AT1G30200
AT1G30220
AT1G30250
AT1G30260
AT1G30270
AT1G30280
AT1G30290
AT1G30310
AT1G30320
AT1G30330
AT1G30340
AT1G30350
AT1G30360
AT1G30370
AT1G30400
AT1G30410
AT1G30475
AT1G30490
AT1G30500
AT1G30530
AT1G30570
AT1G30610
AT1G30620
AT1G30650
AT1G30660
AT1G30690
AT1G30700
AT1G30720
AT1G30730
AT1G30757
AT1G30780
AT1G30820
AT1G30825
AT1G30835
AT1G30840
AT1G30860
AT1G30900
AT1G31010
AT1G31030
AT1G31040
AT1G31070
AT1G31120
AT1G31130
AT1G31150
AT1G31173
AT1G31310
AT1G31320
AT1G31330
AT1G31350
AT1G31355
AT1G31358
AT1G31410
AT1G31470
AT1G31540
AT1G31550
AT1G31580
AT1G31710
AT1G31720
AT1G31730
AT1G31760
AT1G31772
AT1G31790
AT1G31830
AT1G31835
AT1G31850
AT1G31860
AT1G31880
AT1G31910
AT1G31940
AT1G32049
AT1G32060
AT1G32090
AT1G32100
AT1G32120
AT1G32170
AT1G32190
AT1G32200
AT1G32230
AT1G32240
AT1G32290
AT1G32340
AT1G32360
AT1G32400
AT1G32410
AT1G32450
AT1G32460
AT1G32530
AT1G32540
AT1G32550
AT1G32610
AT1G32640
AT1G32650
AT1G32670
AT1G32680
AT1G32690
AT1G32700
AT1G32710
AT1G32730
AT1G32740
AT1G32770
AT1G32780
AT1G32860
AT1G32900
AT1G33060
AT1G33110
AT1G33230
AT1G33240
AT1G33250
AT1G33260
AT1G33270
AT1G33280
AT1G33350
AT1G33420
AT1G33450
AT1G33560
AT1G33590
AT1G33600
AT1G33607
AT1G33610
AT1G33680
AT1G33700
AT1G33730
AT1G33760
AT1G33780
AT1G33811
AT1G33960
AT1G33970
AT1G33990
AT1G34030
AT1G34210
AT1G34245
AT1G34315
AT1G34360
AT1G34370
AT1G34630
AT1G34670
AT1G35110
AT1G35140
AT1G35160
AT1G35190
AT1G35210
AT1G35220
AT1G35250
AT1G35255
AT1G35333
AT1G35350
AT1G35430
AT1G35460
AT1G35461
AT1G35510
AT1G35513
AT1G35516
AT1G35560
AT1G35670
AT1G35750
AT1G35780
AT1G35830
AT1G35910
AT1G36060
AT1G36070
AT1G36370
AT1G36936
AT1G37120
AT1G37130
AT1G37140
AT1G38140
AT1G41830
AT1G42420
AT1G42480
AT1G42550
AT1G42990
AT1G43160
AT1G43580
AT1G43670
AT1G43850
AT1G43886
AT1G43980
AT1G44000
AT1G44100
AT1G44170
AT1G44350
AT1G44575
AT1G44750
AT1G44760
AT1G44790
AT1G44800
AT1G44830
AT1G44890
AT1G45010
AT1G45130
AT1G45145
AT1G45160
AT1G45207
AT1G45688
AT1G46192
AT1G46264
AT1G46480
AT1G46554
AT1G46768
AT1G46840
AT1G47128
AT1G47200
AT1G47240
AT1G47310
AT1G47330
AT1G47480
AT1G47490
AT1G47497
AT1G47510
AT1G47520
AT1G47530
AT1G47560
AT1G47570
AT1G47578
AT1G47600
AT1G47610
AT1G47720
AT1G47860
AT1G47890
AT1G47970
AT1G47990
AT1G48000
AT1G48100
AT1G48110
AT1G48130
AT1G48200
AT1G48260
AT1G48280
AT1G48300
AT1G48315
AT1G48320
AT1G48370
AT1G48410
AT1G48480
AT1G48510
AT1G48580
AT1G48610
AT1G48620
AT1G48745
AT1G48790
AT1G48870
AT1G48880
AT1G48953
AT1G48960
AT1G49000
AT1G49005
AT1G49010
AT1G49130
AT1G49160
AT1G49200
AT1G49240
AT1G49320
AT1G49435
AT1G49450
AT1G49500
AT1G49520
AT1G49580
AT1G49600
AT1G49610
AT1G49620
AT1G49650
AT1G49730
AT1G49750
AT1G49780
AT1G49840
AT1G49850
AT1G49870
AT1G49890
AT1G49950
AT1G50020
AT1G50040
AT1G50055
AT1G50100
AT1G50110
AT1G50290
AT1G50320
AT1G50420
AT1G50460
AT1G50570
AT1G50575
AT1G50600
AT1G50630
AT1G50650
AT1G50660
AT1G50740
AT1G50840
AT1G50954
AT1G50990
AT1G51090
AT1G51130
AT1G51140
AT1G51160
AT1G51170
AT1G51175
AT1G51190
AT1G51270
AT1G51300
AT1G51355
AT1G51390
AT1G51400
AT1G51460
AT1G51470
AT1G51480
AT1G51530
AT1G51550
AT1G51660
AT1G51680
AT1G51690
AT1G51700
AT1G51710
AT1G51760
AT1G51780
AT1G51790
AT1G51800
AT1G51805
AT1G51840
AT1G51850
AT1G51860
AT1G51940
AT1G51950
AT1G52080
AT1G52110
AT1G52120
AT1G52140
AT1G52150
AT1G52190
AT1G52200
AT1G52240
AT1G52280
AT1G52290
AT1G52300
AT1G52330
AT1G52340
AT1G52347
AT1G52410
AT1G52430
AT1G52565
AT1G52590
AT1G52750
AT1G52760
AT1G52780
AT1G52800
AT1G52857
AT1G52880
AT1G52890
AT1G52905
AT1G53040
AT1G53050
AT1G53060
AT1G53080
AT1G53110
AT1G53130
AT1G53160
AT1G53163
AT1G53170
AT1G53210
AT1G53220
AT1G53230
AT1G53290
AT1G53300
AT1G53310
AT1G53320
AT1G53380
AT1G53400
AT1G53430
AT1G53460
AT1G53470
AT1G53510
AT1G53560
AT1G53570
AT1G53580
AT1G53600
AT1G53610
AT1G53620
AT1G53625
AT1G53690
AT1G53700
AT1G53730
AT1G53770
AT1G53820
AT1G53840
AT1G53850
AT1G53920
AT1G53980
AT1G53990
AT1G54000
AT1G54010
AT1G54020
AT1G54030
AT1G54070
AT1G54090
AT1G54095
AT1G54100
AT1G54120
AT1G54130
AT1G54160
AT1G54180
AT1G54200
AT1G54210
AT1G54270
AT1G54320
AT1G54340
AT1G54450
AT1G54460
AT1G54530
AT1G54575
AT1G54670
AT1G54690
AT1G54710
AT1G54740
AT1G54820
AT1G54840
AT1G55010
AT1G55020
AT1G55100
AT1G55110
AT1G55120
AT1G55140
AT1G55152
AT1G55205
AT1G55210
AT1G55240
AT1G55260
AT1G55265
AT1G55270
AT1G55300
AT1G55330
AT1G55340
AT1G55350
AT1G55360
AT1G55365
AT1G55410
AT1G55420
AT1G55440
AT1G55450
AT1G55480
AT1G55520
AT1G55550
AT1G55580
AT1G55604
AT1G55610
AT1G55660
AT1G55690
AT1G55700
AT1G55740
AT1G55750
AT1G55760
AT1G55790
AT1G55820
AT1G55840
AT1G55850
AT1G55880
AT1G55910
AT1G55920
AT1G56010
AT1G56020
AT1G56030
AT1G56040
AT1G56080
AT1G56120
AT1G56130
AT1G56140
AT1G56145
AT1G56150
AT1G56180
AT1G56200
AT1G56210
AT1G56220
AT1G56230
AT1G56240
AT1G56250
AT1G56300
AT1G56330
AT1G56340
AT1G56430
AT1G56500
AT1G56510
AT1G56540
AT1G56550
AT1G56580
AT1G56600
AT1G56630
AT1G56640
AT1G56650
AT1G56700
AT1G56720
AT1G57550
AT1G57560
AT1G57610
AT1G57620
AT1G57680
AT1G57720
AT1G57770
AT1G57820
AT1G57840
AT1G57850
AT1G57980
AT1G58030
AT1G58080
AT1G58100
AT1G58110
AT1G58170
AT1G58180
AT1G58200
AT1G58225
AT1G58250
AT1G58265
AT1G58270
AT1G58280
AT1G58290
AT1G58330
AT1G58340
AT1G58350
AT1G58360
AT1G58400
AT1G58410
AT1G58420
AT1G58440
AT1G58460
AT1G58470
AT1G58520
AT1G58602
AT1G59530
AT1G59590
AT1G59630
AT1G59640
AT1G59650
AT1G59710
AT1G59730
AT1G59740
AT1G59750
AT1G59820
AT1G59870
AT1G59900
AT1G59910
AT1G59940
AT1G59950
AT1G59960
AT1G59980
AT1G60010
AT1G60025
AT1G60050
AT1G60060
AT1G60140
AT1G60150
AT1G60190
AT1G60270
AT1G60440
AT1G60550
AT1G60590
AT1G60600
AT1G60630
AT1G60660
AT1G60790
AT1G60870
AT1G60890
AT1G60900
AT1G60940
AT1G60950
AT1G60960
AT1G60989
AT1G61010
AT1G61050
AT1G61100
AT1G61120
AT1G61130
AT1G61170
AT1G61215
AT1G61224
AT1G61255
AT1G61260
AT1G61275
AT1G61340
AT1G61350
AT1G61353
AT1G61360
AT1G61370
AT1G61380
AT1G61420
AT1G61450
AT1G61460
AT1G61560
AT1G61610
AT1G61650
AT1G61660
AT1G61667
AT1G61740
AT1G61780
AT1G61800
AT1G61810
AT1G61820
AT1G61850
AT1G61870
AT1G61890
AT1G61900
AT1G61930
AT1G62030
AT1G62040
AT1G62045
AT1G62050
AT1G62180
AT1G62200
AT1G62290
AT1G62300
AT1G62301
AT1G62305
AT1G62310
AT1G62330
AT1G62360
AT1G62370
AT1G62380
AT1G62420
AT1G62422
AT1G62430
AT1G62440
AT1G62460
AT1G62480
AT1G62520
AT1G62540
AT1G62570
AT1G62580
AT1G62660
AT1G62710
AT1G62760
AT1G62770
AT1G62790
AT1G62810
AT1G62820
AT1G62840
AT1G62850
AT1G62870
AT1G62880
AT1G62950
AT1G62960
AT1G62970
AT1G62975
AT1G62990
AT1G63000
AT1G63005
AT1G63010
AT1G63020
AT1G63030
AT1G63040
AT1G63050
AT1G63080
AT1G63090
AT1G63100
AT1G63120
AT1G63130
AT1G63170
AT1G63240
AT1G63245
AT1G63260
AT1G63290
AT1G63295
AT1G63300
AT1G63340
AT1G63360
AT1G63390
AT1G63420
AT1G63430
AT1G63440
AT1G63480
AT1G63500
AT1G63640
AT1G63650
AT1G63670
AT1G63690
AT1G63700
AT1G63710
AT1G63720
AT1G63750
AT1G63800
AT1G63810
AT1G63820
AT1G63835
AT1G63850
AT1G63860
AT1G63880
AT1G63910
AT1G63930
AT1G63950
AT1G64020
AT1G64040
AT1G64050
AT1G64060
AT1G64090
AT1G64105
AT1G64140
AT1G64170
AT1G64190
AT1G64235
AT1G64370
AT1G64380
AT1G64385
AT1G64390
AT1G64405
AT1G64450
AT1G64470
AT1G64500
AT1G64530
AT1G64540
AT1G64585
AT1G64610
AT1G64618
AT1G64620
AT1G64625
AT1G64660
AT1G64680
AT1G64710
AT1G64720
AT1G64740
AT1G64810
AT1G64850
AT1G64900
AT1G64910
AT1G64980
AT1G64990
AT1G65020
AT1G65040
AT1G65070
AT1G65110
AT1G65130
AT1G65295
AT1G65310
AT1G65420
AT1G65440
AT1G65480
AT1G65483
AT1G65486
AT1G65490
AT1G65500
AT1G65520
AT1G65560
AT1G65590
AT1G65610
AT1G65620
AT1G65630
AT1G65690
AT1G65700
AT1G65710
AT1G65720
AT1G65830
AT1G65845
AT1G65870
AT1G65890
AT1G65900
AT1G65920
AT1G65930
AT1G65950
AT1G65960
AT1G65980
AT1G65985
AT1G66070
AT1G66090
AT1G66130
AT1G66140
AT1G66145
AT1G66150
AT1G66160
AT1G66180
AT1G66190
AT1G66200
AT1G66250
AT1G66260
AT1G66340
AT1G66345
AT1G66350
AT1G66360
AT1G66370
AT1G66380
AT1G66390
AT1G66400
AT1G66475
AT1G66480
AT1G66500
AT1G66553
AT1G66580
AT1G66600
AT1G66710
AT1G66725
AT1G66760
AT1G66770
AT1G66783
AT1G66800
AT1G66810
AT1G66830
AT1G66870
AT1G66890
AT1G66900
AT1G66940
AT1G67030
AT1G67040
AT1G67050
AT1G67070
AT1G67090
AT1G67100
AT1G67195
AT1G67230
AT1G67238
AT1G67265
AT1G67300
AT1G67310
AT1G67328
AT1G67340
AT1G67350
AT1G67360
AT1G67400
AT1G67420
AT1G67460
AT1G67480
AT1G67481
AT1G67500
AT1G67510
AT1G67520
AT1G67530
AT1G67560
AT1G67590
AT1G67600
AT1G67710
AT1G67720
AT1G67730
AT1G67740
AT1G67785
AT1G67810
AT1G67856
AT1G67875
AT1G67880
AT1G67900
AT1G67910
AT1G67930
AT1G67950
AT1G67960
AT1G68020
AT1G68050
AT1G68060
AT1G68100
AT1G68130
AT1G68140
AT1G68170
AT1G68260
AT1G68320
AT1G68350
AT1G68360
AT1G68380
AT1G68390
AT1G68400
AT1G68410
AT1G68440
AT1G68450
AT1G68460
AT1G68470
AT1G68490
AT1G68500
AT1G68510
AT1G68520
AT1G68530
AT1G68550
AT1G68552
AT1G68560
[truncated: 7,328 more rows]

## Sheet: VAL1 FUS3-FG overlap genes
AT1G01010
AT1G01020
AT1G01030
AT1G01040
AT1G01050
AT1G01060
AT1G01070
AT1G01090
AT1G01120
AT1G01130
AT1G01140
AT1G01183
AT1G01190
AT1G01220
AT1G01225
AT1G01230
AT1G01240
AT1G01250
AT1G01300
AT1G01320
AT1G01360
AT1G01380
AT1G01390
AT1G01420
AT1G01453
AT1G01470
AT1G01480
AT1G01490
AT1G01510
AT1G01520
AT1G01540
AT1G01550
AT1G01580
AT1G01600
AT1G01610
AT1G01650
AT1G01695
AT1G01720
AT1G01760
AT1G01800
AT1G01810
AT1G01830
AT1G01860
AT1G01910
AT1G01950
AT1G01990
AT1G02020
AT1G02030
AT1G02065
AT1G02070
AT1G02120
AT1G02180
AT1G02205
AT1G02210
AT1G02220
AT1G02228
AT1G02230
AT1G02270
AT1G02305
AT1G02310
AT1G02335
AT1G02340
AT1G02380
AT1G02390
AT1G02391
AT1G02400
AT1G02405
AT1G02420
AT1G02450
AT1G02460
AT1G02475
AT1G02500
AT1G02560
AT1G02610
AT1G02630
AT1G02640
AT1G02650
AT1G02660
AT1G02690
AT1G02700
AT1G02770
AT1G02810
AT1G02850
AT1G02860
AT1G02880
AT1G02890
AT1G02970
AT1G02990
AT1G03000
AT1G03020
AT1G03030
AT1G03040
AT1G03080
AT1G03090
AT1G03106
AT1G03120
AT1G03130
AT1G03160
AT1G03170
AT1G03180
AT1G03200
AT1G03220
AT1G03240
AT1G03290
AT1G03300
AT1G03365
AT1G03370
AT1G03410
AT1G03440
AT1G03457
AT1G03470
AT1G03475
AT1G03510
AT1G03520
AT1G03550
AT1G03590
AT1G03630
AT1G03710
AT1G03720
AT1G03730
AT1G03800
AT1G03830
AT1G03840
AT1G03850
AT1G03905
AT1G03930
AT1G03950
AT1G03980
AT1G04000
AT1G04010
AT1G04030
AT1G04040
AT1G04120
AT1G04140
AT1G04150
AT1G04170
AT1G04180
AT1G04210
AT1G04220
AT1G04240
AT1G04250
AT1G04260
AT1G04270
AT1G04280
AT1G04300
AT1G04310
AT1G04330
AT1G04350
AT1G04360
AT1G04370
AT1G04400
AT1G04410
AT1G04430
AT1G04490
AT1G04500
AT1G04520
AT1G04530
AT1G04550
AT1G04560
AT1G04570
AT1G04590
AT1G04610
AT1G04620
AT1G04630
AT1G04650
AT1G04670
AT1G04680
AT1G04684
AT1G04700
AT1G04710
AT1G04720
AT1G04750
AT1G04770
AT1G04780
AT1G04800
AT1G04820
AT1G04830
AT1G04920
AT1G04930
AT1G04960
AT1G04980
AT1G04985
AT1G04990
AT1G05000
AT1G05010
AT1G05020
AT1G05070
AT1G05090
AT1G05100
AT1G05120
AT1G05135
AT1G05140
AT1G05150
AT1G05170
AT1G05200
AT1G05230
AT1G05240
AT1G05260
AT1G05270
AT1G05300
AT1G05340
AT1G05350
AT1G05370
AT1G05410
AT1G05420
AT1G05430
AT1G05450
AT1G05460
AT1G05470
AT1G05490
AT1G05510
AT1G05520
AT1G05530
AT1G05550
AT1G05560
AT1G05570
AT1G05620
AT1G05630
AT1G05660
AT1G05680
AT1G05710
AT1G05720
AT1G05750
AT1G05800
AT1G05805
AT1G05835
AT1G05840
AT1G05850
AT1G05870
AT1G05900
AT1G05950
AT1G05970
AT1G06000
AT1G06020
AT1G06040
AT1G06070
AT1G06080
AT1G06110
AT1G06130
AT1G06148
AT1G06149
AT1G06160
AT1G06180
AT1G06190
AT1G06200
AT1G06270
AT1G06290
AT1G06310
AT1G06320
AT1G06330
AT1G06360
AT1G06370
AT1G06390
AT1G06410
AT1G06430
AT1G06475
AT1G06480
AT1G06510
AT1G06520
AT1G06530
AT1G06570
AT1G06640
AT1G06680
AT1G06700
AT1G06740
AT1G06760
AT1G06770
AT1G06790
AT1G06800
AT1G06840
AT1G06850
AT1G06890
AT1G06930
AT1G06980
AT1G06990
AT1G07030
AT1G07040
AT1G07080
AT1G07090
AT1G07100
AT1G07110
AT1G07128
AT1G07135
AT1G07175
AT1G07180
AT1G07200
AT1G07220
AT1G07230
AT1G07270
AT1G07280
AT1G07310
AT1G07350
AT1G07360
AT1G07390
AT1G07400
AT1G07420
AT1G07430
AT1G07470
AT1G07480
AT1G07485
AT1G07500
AT1G07520
AT1G07530
AT1G07540
AT1G07570
AT1G07580
AT1G07590
AT1G07630
AT1G07640
AT1G07645
AT1G07670
AT1G07680
AT1G07700
AT1G07710
AT1G07720
AT1G07745
AT1G07750
AT1G07760
AT1G07770
AT1G07820
AT1G07870
AT1G07885
AT1G07900
AT1G07910
AT1G07920
AT1G07930
AT1G07940
AT1G07950
AT1G07980
AT1G08030
AT1G08040
AT1G08060
AT1G08080
AT1G08090
AT1G08100
AT1G08110
AT1G08115
AT1G08130
AT1G08190
AT1G08200
AT1G08210
AT1G08230
AT1G08250
AT1G08315
AT1G08320
AT1G08340
AT1G08370
AT1G08380
AT1G08420
AT1G08440
AT1G08450
AT1G08460
AT1G08465
AT1G08470
AT1G08490
AT1G08500
AT1G08510
AT1G08570
AT1G08580
AT1G08630
AT1G08640
AT1G08650
AT1G08660
AT1G08680
AT1G08695
AT1G08700
AT1G08720
AT1G08760
AT1G08820
AT1G08845
AT1G08860
AT1G08870
AT1G08910
AT1G08920
AT1G08930
AT1G08940
AT1G08970
AT1G08990
AT1G09010
AT1G09040
AT1G09050
AT1G09070
AT1G09130
AT1G09140
AT1G09155
AT1G09157
AT1G09160
AT1G09200
AT1G09210
AT1G09230
AT1G09250
AT1G09310
AT1G09350
AT1G09380
AT1G09390
AT1G09420
AT1G09440
AT1G09460
AT1G09470
AT1G09500
AT1G09520
AT1G09530
AT1G09540
AT1G09560
AT1G09570
AT1G09580
AT1G09600
AT1G09630
AT1G09645
AT1G09680
AT1G09750
AT1G09780
AT1G09795
AT1G09800
AT1G09810
AT1G09850
AT1G09870
AT1G09880
AT1G09940
AT1G09960
AT1G09970
AT1G09980
AT1G10020
AT1G10060
AT1G10070
AT1G10090
AT1G10120
AT1G10130
AT1G10180
AT1G10200
AT1G10220
AT1G10230
AT1G10240
AT1G10270
AT1G10280
AT1G10300
AT1G10350
AT1G10360
AT1G10380
AT1G10385
AT1G10390
AT1G10410
AT1G10417
AT1G10460
AT1G10470
AT1G10480
AT1G10490
AT1G10500
AT1G10520
AT1G10530
AT1G10550
AT1G10580
AT1G10590
AT1G10640
AT1G10650
AT1G10652
AT1G10657
AT1G10680
AT1G10682
AT1G10690
AT1G10700
AT1G10730
AT1G10740
AT1G10750
AT1G10760
AT1G10770
AT1G10890
AT1G10920
AT1G10930
AT1G10940
AT1G10960
AT1G11060
AT1G11080
AT1G11090
AT1G11112
AT1G11120
AT1G11125
AT1G11130
AT1G11160
AT1G11170
AT1G11210
AT1G11220
AT1G11230
AT1G11240
AT1G11250
AT1G11260
AT1G11280
AT1G11290
AT1G11310
AT1G11320
AT1G11330
AT1G11370
AT1G11390
AT1G11420
AT1G11440
AT1G11530
AT1G11545
AT1G11580
AT1G11590
AT1G11600
AT1G11620
AT1G11630
AT1G11660
AT1G11670
AT1G11680
AT1G11690
AT1G11700
AT1G11720
AT1G11735
AT1G11740
AT1G11770
AT1G11800
AT1G11820
AT1G11840
AT1G11850
AT1G11905
AT1G11910
AT1G11940
AT1G11950
AT1G11960
AT1G12000
AT1G12020
AT1G12030
AT1G12060
AT1G12070
AT1G12080
AT1G12090
AT1G12100
AT1G12110
AT1G12120
AT1G12150
AT1G12200
AT1G12210
AT1G12230
AT1G12240
AT1G12270
AT1G12290
AT1G12300
AT1G12330
AT1G12370
AT1G12380
AT1G12411
AT1G12430
AT1G12440
AT1G12500
AT1G12550
AT1G12560
AT1G12580
AT1G12610
AT1G12640
AT1G12670
AT1G12680
AT1G12710
AT1G12730
AT1G12740
AT1G12750
AT1G12780
AT1G12800
AT1G12820
AT1G12845
AT1G12900
AT1G12950
AT1G12980
AT1G12990
AT1G13020
AT1G13060
AT1G13080
AT1G13090
AT1G13130
AT1G13170
AT1G13180
AT1G13195
AT1G13210
AT1G13220
AT1G13230
AT1G13240
AT1G13250
AT1G13260
AT1G13280
AT1G13300
AT1G13310
AT1G13350
AT1G13360
AT1G13370
AT1G13380
AT1G13390
AT1G13430
AT1G13440
AT1G13450
AT1G13470
AT1G13560
AT1G13570
AT1G13590
AT1G13605
AT1G13620
AT1G13640
AT1G13650
AT1G13690
AT1G13700
AT1G13710
AT1G13740
AT1G13750
AT1G13770
AT1G13780
AT1G13800
AT1G13860
AT1G13930
AT1G13940
AT1G13950
AT1G13960
AT1G13980
AT1G13990
AT1G14000
AT1G14010
AT1G14040
AT1G14090
AT1G14120
AT1G14160
AT1G14170
AT1G14200
AT1G14210
AT1G14230
AT1G14240
AT1G14260
AT1G14270
AT1G14290
AT1G14330
AT1G14340
AT1G14345
AT1G14350
AT1G14360
AT1G14400
AT1G14440
AT1G14450
AT1G14460
AT1G14490
AT1G14520
AT1G14530
AT1G14560
AT1G14570
AT1G14580
AT1G14590
AT1G14600
AT1G14620
AT1G14685
AT1G14687
AT1G14690
AT1G14700
AT1G14710
AT1G14740
AT1G14750
AT1G14770
AT1G14780
AT1G14820
AT1G14830
AT1G14840
AT1G14860
AT1G14870
AT1G14890
AT1G14910
AT1G14920
AT1G14950
AT1G14960
AT1G14970
AT1G14990
AT1G15040
AT1G15060
AT1G15090
AT1G15100
AT1G15110
AT1G15120
AT1G15125
AT1G15140
AT1G15165
AT1G15175
AT1G15190
AT1G15200
AT1G15220
AT1G15230
AT1G15250
AT1G15290
AT1G15300
AT1G15310
AT1G15320
AT1G15340
AT1G15350
AT1G15360
AT1G15370
AT1G15380
AT1G15400
AT1G15420
AT1G15440
AT1G15460
AT1G15480
AT1G15490
AT1G15500
AT1G15520
AT1G15530
AT1G15550
AT1G15570
AT1G15580
AT1G15650
AT1G15670
AT1G15690
AT1G15720
AT1G15740
AT1G15750
AT1G15757
AT1G15800
AT1G15820
AT1G15840
AT1G15860
AT1G15920
AT1G15930
AT1G15940
AT1G15950
AT1G15960
AT1G15970
AT1G16000
AT1G16010
AT1G16060
AT1G16150
AT1G16170
AT1G16190
AT1G16240
AT1G16300
AT1G16330
AT1G16360
AT1G16410
AT1G16420
AT1G16460
AT1G16480
AT1G16490
AT1G16500
AT1G16510
AT1G16515
AT1G16530
AT1G16635
AT1G16670
AT1G16680
AT1G16705
AT1G16710
AT1G16720
AT1G16730
AT1G16750
AT1G16760
AT1G16770
AT1G16780
AT1G16820
AT1G16850
AT1G16870
AT1G16890
AT1G16916
AT1G16920
AT1G17010
AT1G17040
AT1G17050
AT1G17060
AT1G17090
AT1G17120
AT1G17130
AT1G17140
AT1G17147
AT1G17150
AT1G17190
AT1G17200
AT1G17210
AT1G17230
AT1G17235
AT1G17290
AT1G17340
AT1G17345
AT1G17360
AT1G17370
AT1G17380
AT1G17400
AT1G17410
AT1G17420
AT1G17440
AT1G17460
AT1G17495
AT1G17510
AT1G17550
AT1G17560
AT1G17590
AT1G17615
AT1G17620
AT1G17650
AT1G17710
AT1G17720
AT1G17744
AT1G17780
AT1G17790
AT1G17820
AT1G17830
AT1G17840
AT1G17850
AT1G17890
AT1G17920
AT1G17940
AT1G18100
AT1G18140
AT1G18150
AT1G18190
AT1G18191
AT1G18200
AT1G18250
AT1G18260
AT1G18270
AT1G18290
AT1G18300
AT1G18310
AT1G18330
AT1G18335
AT1G18382
AT1G18400
AT1G18410
AT1G18415
AT1G18460
AT1G18470
AT1G18500
AT1G18560
AT1G18570
AT1G18580
AT1G18610
AT1G18620
AT1G18640
AT1G18650
AT1G18670
AT1G18680
AT1G18710
AT1G18720
AT1G18740
AT1G18745
AT1G18760
AT1G18800
AT1G18820
AT1G18835
AT1G18840
AT1G18850
AT1G18870
AT1G18879
AT1G18890
AT1G18900
AT1G18910
AT1G18940
AT1G18970
AT1G18990
AT1G19000
AT1G19010
AT1G19050
AT1G19086
AT1G19110
AT1G19140
AT1G19180
AT1G19210
AT1G19220
AT1G19230
AT1G19250
AT1G19270
AT1G19300
AT1G19310
AT1G19330
AT1G19350
AT1G19400
AT1G19430
AT1G19440
AT1G19460
AT1G19464
AT1G19485
AT1G19490
AT1G19530
AT1G19540
AT1G19570
AT1G19610
AT1G19630
AT1G19640
AT1G19650
AT1G19660
AT1G19700
AT1G19720
AT1G19770
AT1G19780
AT1G19800
AT1G19810
AT1G19830
AT1G19835
AT1G19840
AT1G19850
AT1G19870
AT1G19900
AT1G19910
AT1G19920
AT1G19940
AT1G19950
AT1G19960
AT1G19968
AT1G19970
AT1G20010
AT1G20030
AT1G20070
AT1G20090
AT1G20100
AT1G20170
AT1G20190
AT1G20200
AT1G20220
AT1G20225
AT1G20250
AT1G20270
AT1G20310
AT1G20330
AT1G20340
AT1G20370
AT1G20375
AT1G20380
AT1G20410
AT1G20440
AT1G20480
AT1G20490
AT1G20510
AT1G20520
AT1G20540
AT1G20560
AT1G20575
AT1G20620
AT1G20630
AT1G20640
AT1G20650
AT1G20657
AT1G20670
AT1G20691
AT1G20696
AT1G20790
AT1G20810
AT1G20820
AT1G20823
AT1G20840
AT1G20860
AT1G20875
AT1G20890
AT1G20900
AT1G20925
AT1G20940
AT1G20960
AT1G20967
AT1G20980
AT1G20990
AT1G21000
AT1G21010
AT1G21020
AT1G21050
AT1G21060
AT1G21070
AT1G21080
AT1G21090
AT1G21100
AT1G21110
AT1G21130
AT1G21140
AT1G21150
AT1G21290
AT1G21310
AT1G21320
AT1G21327
AT1G21360
AT1G21370
AT1G21380
AT1G21400
AT1G21410
AT1G21450
AT1G21460
AT1G21500
AT1G21520
AT1G21525
AT1G21560
AT1G21580
AT1G21590
AT1G21640
AT1G21650
AT1G21660
AT1G21670
AT1G21695
AT1G21730
AT1G21738
AT1G21750
AT1G21760
AT1G21770
AT1G21790
AT1G21830
AT1G21835
AT1G21880
AT1G21890
AT1G21900
AT1G21910
AT1G21920
AT1G21940
AT1G21950
AT1G21970
AT1G21975
AT1G21980
AT1G21990
AT1G22030
AT1G22040
AT1G22050
AT1G22060
AT1G22070
AT1G22100
AT1G22160
AT1G22170
AT1G22180
AT1G22190
AT1G22200
AT1G22220
AT1G22230
AT1G22240
AT1G22250
AT1G22260
AT1G22310
AT1G22400
AT1G22403
AT1G22410
AT1G22430
AT1G22460
AT1G22470
AT1G22510
AT1G22520
AT1G22530
AT1G22540
AT1G22570
AT1G22600
AT1G22610
AT1G22640
AT1G22650
AT1G22710
AT1G22720
AT1G22740
AT1G22767
AT1G22790
AT1G22800
AT1G22882
AT1G22920
AT1G22930
AT1G22940
AT1G22950
AT1G22990
AT1G23000
AT1G23020
AT1G23030
AT1G23040
AT1G23050
AT1G23060
AT1G23070
AT1G23074
AT1G23080
AT1G23090
AT1G23100
AT1G23110
AT1G23170
AT1G23190
AT1G23200
AT1G23201
AT1G23205
AT1G23210
AT1G23220
AT1G23240
AT1G23280
AT1G23300
AT1G23310
AT1G23330
AT1G23360
AT1G23380
AT1G23390
AT1G23440
AT1G23490
AT1G23560
AT1G23700
AT1G23710
AT1G23730
AT1G23740
AT1G23780
AT1G23820
AT1G23860
AT1G23880
AT1G23890
AT1G23960
AT1G23980
AT1G23990
AT1G24010
AT1G24040
AT1G24080
AT1G24095
AT1G24100
AT1G24120
AT1G24148
AT1G24150
AT1G24160
AT1G24170
AT1G24180
AT1G24240
AT1G24260
AT1G24265
AT1G24267
AT1G24340
AT1G24350
AT1G24440
AT1G24530
AT1G24575
AT1G24580
AT1G24600
AT1G24625
AT1G24706
AT1G24733
AT1G24792
AT1G25220
AT1G25250
AT1G25260
AT1G25275
AT1G25280
AT1G25310
AT1G25320
AT1G25340
AT1G25350
AT1G25370
AT1G25375
AT1G25410
AT1G25422
AT1G25425
AT1G25440
AT1G25450
AT1G25460
AT1G25480
AT1G25500
AT1G25530
AT1G25540
AT1G25560
AT1G25570
AT1G25580
AT1G26090
AT1G26130
AT1G26150
AT1G26160
AT1G26190
AT1G26200
AT1G26208
AT1G26218
AT1G26230
AT1G26260
AT1G26270
AT1G26390
AT1G26410
AT1G26490
AT1G26550
AT1G26558
AT1G26560
AT1G26570
AT1G26590
AT1G26600
AT1G26620
AT1G26660
AT1G26670
AT1G26690
AT1G26720
AT1G26730
AT1G26762
AT1G26770
AT1G26790
AT1G26800
AT1G26810
AT1G26850
AT1G26870
AT1G26900
AT1G26916
AT1G26920
AT1G26930
AT1G26940
AT1G26945
AT1G26960
AT1G26970
AT1G27030
AT1G27050
AT1G27070
AT1G27090
AT1G27100
AT1G27120
AT1G27130
AT1G27170
AT1G27200
AT1G27210
AT1G27213
AT1G27290
AT1G27330
AT1G27340
AT1G27350
AT1G27360
AT1G27440
AT1G27460
AT1G27470
AT1G27500
AT1G27510
AT1G27540
AT1G27600
AT1G27630
AT1G27640
AT1G27650
AT1G27660
AT1G27670
AT1G27690
AT1G27700
AT1G27730
AT1G27750
AT1G27760
AT1G27840
AT1G27850
AT1G27930
AT1G27940
AT1G27960
AT1G28007
AT1G28050
AT1G28070
AT1G28080
AT1G28100
AT1G28110
AT1G28130
AT1G28135
AT1G28180
AT1G28200
AT1G28230
AT1G28250
AT1G28260
AT1G28280
AT1G28310
AT1G28320
AT1G28330
AT1G28340
AT1G28360
AT1G28370
AT1G28375
AT1G28390
AT1G28395
AT1G28400
AT1G28410
AT1G28430
AT1G28447
AT1G28480
AT1G28520
AT1G28530
AT1G28580
AT1G28591
AT1G28600
AT1G28620
AT1G28640
AT1G28650
AT1G28680
AT1G28690
AT1G28760
AT1G28960
AT1G29050
AT1G29060
AT1G29150
AT1G29170
AT1G29195
AT1G29230
AT1G29240
AT1G29270
AT1G29280
AT1G29290
AT1G29300
AT1G29330
AT1G29340
AT1G29390
AT1G29400
AT1G29470
AT1G29530
AT1G29600
AT1G29640
AT1G29660
AT1G29670
AT1G29680
AT1G29690
AT1G29700
AT1G29715
AT1G29720
AT1G29785
AT1G29810
AT1G29840
AT1G29870
AT1G29880
AT1G29900
AT1G29910
AT1G29920
AT1G29930
AT1G29970
AT1G29980
AT1G30016
AT1G30020
AT1G30040
AT1G30050
AT1G30070
AT1G30080
AT1G30100
AT1G30110
AT1G30120
AT1G30130
AT1G30135
AT1G30190
AT1G30200
AT1G30210
AT1G30250
AT1G30260
AT1G30270
AT1G30280
AT1G30290
AT1G30320
AT1G30330
AT1G30340
AT1G30350
AT1G30360
AT1G30370
AT1G30400
AT1G30410
AT1G30450
AT1G30460
AT1G30475
AT1G30490
AT1G30500
AT1G30530
AT1G30570
AT1G30590
AT1G30600
AT1G30620
AT1G30660
AT1G30690
AT1G30700
AT1G30720
AT1G30757
AT1G30780
AT1G30810
AT1G30820
AT1G30825
AT1G30835
AT1G30840
AT1G30850
AT1G30860
AT1G30900
AT1G31010
AT1G31030
AT1G31040
AT1G31070
AT1G31120
AT1G31130
AT1G31150
AT1G31160
AT1G31170
AT1G31173
AT1G31230
AT1G31258
AT1G31310
AT1G31320
AT1G31330
AT1G31340
AT1G31350
AT1G31355
AT1G31358
AT1G31410
AT1G31450
AT1G31550
AT1G31580
AT1G31650
AT1G31710
AT1G31720
AT1G31730
AT1G31790
AT1G31812
AT1G31830
AT1G31835
AT1G31850
AT1G31860
AT1G31880
AT1G31910
AT1G31920
AT1G31940
AT1G32049
AT1G32060
AT1G32090
AT1G32100
AT1G32120
AT1G32150
AT1G32170
AT1G32180
AT1G32190
AT1G32200
AT1G32230
AT1G32240
AT1G32290
AT1G32320
AT1G32330
AT1G32350
AT1G32360
AT1G32380
AT1G32400
AT1G32410
AT1G32415
AT1G32440
AT1G32450
AT1G32460
AT1G32530
AT1G32540
AT1G32550
AT1G32640
AT1G32650
AT1G32670
AT1G32690
AT1G32700
AT1G32710
AT1G32730
AT1G32740
AT1G32770
AT1G32780
AT1G32860
AT1G32870
AT1G32900
AT1G32928
AT1G32930
AT1G32940
AT1G33050
AT1G33060
AT1G33102
AT1G33110
AT1G33230
AT1G33240
AT1G33250
AT1G33260
AT1G33265
AT1G33270
AT1G33280
AT1G33350
AT1G33370
AT1G33420
AT1G33560
AT1G33590
AT1G33600
AT1G33607
AT1G33610
AT1G33680
AT1G33700
AT1G33730
AT1G33750
AT1G33760
AT1G33780
AT1G33785
AT1G33800
AT1G33810
AT1G33811
AT1G33960
AT1G33970
AT1G34000
AT1G34030
AT1G34180
AT1G34210
AT1G34245
AT1G34315
AT1G34360
AT1G34370
AT1G34418
AT1G34430
AT1G34550
AT1G34630
AT1G34640
AT1G34670
AT1G34770
AT1G34780
AT1G35110
AT1G35140
AT1G35160
AT1G35190
AT1G35220
AT1G35320
AT1G35333
AT1G35340
AT1G35350
AT1G35430
AT1G35460
AT1G35465
AT1G35510
AT1G35513
AT1G35516
AT1G35560
AT1G35570
AT1G35580
AT1G35670
AT1G35730
AT1G35750
AT1G35780
AT1G35830
AT1G35910
AT1G36060
AT1G36070
AT1G36160
AT1G36180
AT1G36220
AT1G36370
AT1G36380
AT1G37120
AT1G37130
AT1G37140
AT1G38140
AT1G41830
AT1G42550
AT1G42960
AT1G42970
AT1G42990
AT1G43160
AT1G43600
AT1G43630
AT1G43670
AT1G43700
AT1G43765
AT1G43800
AT1G43850
AT1G43886
AT1G43890
AT1G43980
AT1G44000
AT1G44080
AT1G44100
AT1G44170
AT1G44350
AT1G44446
AT1G44575
AT1G44750
AT1G44760
AT1G44770
AT1G44790
AT1G44800
AT1G44810
AT1G44830
AT1G44890
AT1G44940
AT1G45000
AT1G45010
AT1G45130
AT1G45145
AT1G45160
AT1G45170
AT1G45207
AT1G45248
AT1G45249
AT1G45474
AT1G45688
AT1G45976
AT1G46264
AT1G46408
AT1G46480
AT1G46554
AT1G46768
AT1G47056
AT1G47128
AT1G47200
AT1G47240
AT1G47310
AT1G47330
AT1G47380
AT1G47420
AT1G47480
AT1G47490
AT1G47497
AT1G47510
AT1G47520
AT1G47530
AT1G47540
AT1G47560
AT1G47565
AT1G47570
AT1G47578
AT1G47610
AT1G47720
AT1G47740
AT1G47750
AT1G47765
AT1G47840
AT1G47860
AT1G47900
AT1G47970
AT1G47990
AT1G48000
AT1G48040
AT1G48050
AT1G48100
AT1G48110
AT1G48200
AT1G48240
AT1G48260
AT1G48267
AT1G48270
AT1G48280
AT1G48300
AT1G48320
AT1G48330
AT1G48370
AT1G48410
AT1G48450
AT1G48480
AT1G48490
AT1G48510
AT1G48580
AT1G48610
AT1G48620
AT1G48630
AT1G48650
AT1G48745
AT1G48790
AT1G48830
AT1G48870
AT1G48880
AT1G48920
AT1G48953
AT1G48970
AT1G48990
AT1G49005
AT1G49032
AT1G49050
AT1G49130
AT1G49160
AT1G49200
AT1G49240
AT1G49320
AT1G49430
AT1G49435
AT1G49450
AT1G49490
AT1G49500
AT1G49520
AT1G49540
AT1G49580
AT1G49600
AT1G49610
AT1G49620
AT1G49630
AT1G49670
AT1G49710
AT1G49720
AT1G49730
AT1G49760
AT1G49780
AT1G49820
AT1G49832
AT1G49840
AT1G49850
AT1G49870
AT1G49890
AT1G49970
AT1G49990
AT1G50020
AT1G50040
AT1G50055
AT1G50100
AT1G50110
AT1G50200
AT1G50280
AT1G50290
AT1G50320
AT1G50370
AT1G50380
AT1G50410
AT1G50420
AT1G50450
AT1G50460
AT1G50570
AT1G50575
AT1G50600
AT1G50630
AT1G50650
AT1G50732
AT1G50740
AT1G50890
AT1G50990
AT1G51060
AT1G51090
AT1G51130
AT1G51140
AT1G51160
AT1G51170
AT1G51190
AT1G51210
AT1G51300
AT1G51310
AT1G51355
AT1G51360
AT1G51400
AT1G51460
AT1G51470
AT1G51500
AT1G51510
AT1G51530
AT1G51540
AT1G51550
AT1G51560
AT1G51610
AT1G51660
AT1G51690
AT1G51700
AT1G51710
AT1G51760
AT1G51780
AT1G51790
AT1G51800
AT1G51940
AT1G51950
AT1G52080
AT1G52120
AT1G52140
AT1G52150
AT1G52155
AT1G52185
AT1G52190
AT1G52220
AT1G52240
AT1G52280
AT1G52290
AT1G52300
AT1G52310
AT1G52315
AT1G52330
AT1G52340
AT1G52347
AT1G52360
AT1G52410
AT1G52430
AT1G52450
AT1G52510
AT1G52565
AT1G52590
AT1G52615
AT1G52750
AT1G52760
AT1G52780
AT1G52840
AT1G52855
AT1G52857
AT1G52880
AT1G52890
AT1G52905
AT1G52990
AT1G53040
AT1G53050
AT1G53070
AT1G53080
AT1G53130
AT1G53160
AT1G53163
AT1G53165
AT1G53170
AT1G53180
AT1G53190
AT1G53200
AT1G53220
AT1G53230
AT1G53233
AT1G53240
AT1G53280
AT1G53290
AT1G53300
AT1G53310
AT1G53320
AT1G53340
AT1G53380
AT1G53400
AT1G53430
AT1G53460
AT1G53500
AT1G53510
AT1G53560
AT1G53580
AT1G53610
AT1G53620
AT1G53625
AT1G53640
AT1G53645
AT1G53670
AT1G53683
AT1G53690
AT1G53700
AT1G53730
AT1G53750
AT1G53760
AT1G53770
AT1G53820
AT1G53840
AT1G53850
AT1G53887
AT1G53920
AT1G54000
AT1G54010
AT1G54020
AT1G54030
AT1G54035
AT1G54050
AT1G54070
AT1G54080
AT1G54090
AT1G54095
AT1G54100
AT1G54115
AT1G54120
AT1G54130
AT1G54140
AT1G54160
AT1G54180
AT1G54200
AT1G54210
AT1G54217
AT1G54320
AT1G54340
AT1G54385
AT1G54390
AT1G54450
AT1G54520
AT1G54575
AT1G54580
AT1G54650
AT1G54670
AT1G54690
AT1G54710
AT1G54740
AT1G54780
AT1G54820
AT1G54840
AT1G54940
AT1G54970
AT1G54990
AT1G55010
AT1G55020
AT1G55040
AT1G55050
AT1G55080
AT1G55100
AT1G55110
AT1G55120
AT1G55140
AT1G55152
AT1G55190
AT1G55205
AT1G55210
AT1G55250
AT1G55260
AT1G55265
AT1G55270
AT1G55280
AT1G55300
AT1G55330
AT1G55340
AT1G55350
AT1G55360
AT1G55390
AT1G55420
AT1G55440
AT1G55480
AT1G55510
AT1G55520
AT1G55530
AT1G55535
AT1G55546
AT1G55550
AT1G55580
AT1G55590
AT1G55604
AT1G55610
AT1G55615
AT1G55660
AT1G55670
AT1G55690
AT1G55700
AT1G55730
AT1G55740
AT1G55750
AT1G55760
AT1G55810
AT1G55820
AT1G55830
AT1G55840
AT1G55860
AT1G55880
AT1G55900
AT1G55910
AT1G55920
AT1G55930
AT1G55980
AT1G56000
AT1G56010
AT1G56020
AT1G56040
AT1G56070
AT1G56080
AT1G56090
AT1G56120
AT1G56130
AT1G56140
AT1G56145
AT1G56150
AT1G56160
AT1G56165
AT1G56200
AT1G56210
AT1G56220
AT1G56230
AT1G56233
AT1G56300
AT1G56310
AT1G56330
AT1G56340
AT1G56345
AT1G56430
AT1G56500
AT1G56510
AT1G56520
AT1G56540
AT1G56550
AT1G56553
AT1G56555
AT1G56580
AT1G56590
AT1G56600
AT1G56630
AT1G56640
AT1G56650
AT1G56660
AT1G56670
AT1G56690
AT1G56700
AT1G56710
AT1G56720
AT1G57600
AT1G57610
AT1G57620
AT1G57630
AT1G57660
AT1G57680
AT1G57720
AT1G57770
AT1G57820
AT1G57840
AT1G58030
AT1G58080
AT1G58100
AT1G58150
AT1G58160
AT1G58180
AT1G58200
AT1G58235
AT1G58250
AT1G58265
AT1G58270
AT1G58280
AT1G58290
AT1G58330
AT1G58340
AT1G58350
AT1G58360
AT1G58400
AT1G58410
AT1G58420
AT1G58440
AT1G58460
AT1G58470
AT1G58520
AT1G58602
AT1G59520
AT1G59530
AT1G59620
AT1G59630
AT1G59640
AT1G59650
AT1G59660
AT1G59700
AT1G59740
AT1G59750
AT1G59820
AT1G59860
AT1G59890
AT1G59900
AT1G59910
AT1G59940
AT1G59950
AT1G59980
AT1G60010
AT1G60025
AT1G60050
AT1G60060
AT1G60090
AT1G60140
AT1G60150
AT1G60160
AT1G60190
AT1G60270
AT1G60380
AT1G60420
AT1G60430
AT1G60440
AT1G60550
[truncated: 9,170 more rows]

## Sheet: VAL2 FUS3-FG overlap genes
AT1G01010
AT1G01020
AT1G01030
AT1G01040
AT1G01050
AT1G01060
AT1G01070
AT1G01120
AT1G01130
AT1G01140
AT1G01180
AT1G01183
AT1G01190
AT1G01225
AT1G01240
AT1G01250
AT1G01300
AT1G01320
AT1G01360
AT1G01380
AT1G01390
AT1G01420
AT1G01430
AT1G01453
AT1G01470
AT1G01480
AT1G01490
AT1G01510
AT1G01520
AT1G01540
AT1G01550
AT1G01580
AT1G01600
AT1G01610
AT1G01620
AT1G01650
AT1G01695
AT1G01710
AT1G01720
AT1G01760
AT1G01800
AT1G01830
AT1G01860
AT1G01910
AT1G01950
AT1G01990
AT1G02020
AT1G02030
AT1G02065
AT1G02070
AT1G02170
AT1G02180
AT1G02205
AT1G02210
AT1G02220
AT1G02228
AT1G02230
AT1G02270
AT1G02305
AT1G02310
AT1G02335
AT1G02340
AT1G02360
AT1G02380
AT1G02390
AT1G02391
AT1G02400
AT1G02420
AT1G02450
AT1G02460
AT1G02475
AT1G02500
AT1G02560
AT1G02610
AT1G02630
AT1G02640
AT1G02650
AT1G02660
AT1G02690
AT1G02700
AT1G02770
AT1G02810
AT1G02850
AT1G02860
AT1G02880
AT1G02890
AT1G03000
AT1G03022
AT1G03030
AT1G03040
AT1G03060
AT1G03080
AT1G03106
AT1G03120
AT1G03130
AT1G03160
AT1G03170
AT1G03200
AT1G03220
AT1G03240
AT1G03290
AT1G03300
AT1G03365
AT1G03370
AT1G03410
AT1G03440
AT1G03457
AT1G03470
AT1G03510
AT1G03520
AT1G03550
AT1G03590
AT1G03710
AT1G03720
AT1G03730
AT1G03760
AT1G03800
AT1G03840
AT1G03850
AT1G03860
AT1G03905
AT1G03930
AT1G03950
AT1G03980
AT1G04000
AT1G04010
AT1G04030
AT1G04040
AT1G04120
AT1G04140
AT1G04150
AT1G04170
AT1G04180
AT1G04210
AT1G04220
AT1G04240
AT1G04250
AT1G04260
AT1G04270
AT1G04280
AT1G04300
AT1G04310
AT1G04330
AT1G04350
AT1G04360
AT1G04370
AT1G04400
AT1G04410
AT1G04430
AT1G04490
AT1G04500
AT1G04520
AT1G04530
AT1G04550
AT1G04570
AT1G04590
AT1G04610
AT1G04630
AT1G04650
AT1G04670
AT1G04680
AT1G04684
AT1G04710
AT1G04720
AT1G04750
AT1G04770
AT1G04780
AT1G04820
AT1G04920
AT1G04960
AT1G04980
AT1G04985
AT1G04990
AT1G05000
AT1G05010
AT1G05070
AT1G05090
AT1G05100
AT1G05120
AT1G05135
AT1G05140
AT1G05150
AT1G05170
AT1G05200
AT1G05230
AT1G05240
AT1G05260
AT1G05270
AT1G05300
AT1G05340
AT1G05350
AT1G05370
AT1G05380
AT1G05410
AT1G05420
AT1G05460
AT1G05470
AT1G05490
AT1G05520
AT1G05530
AT1G05540
AT1G05550
AT1G05560
AT1G05570
AT1G05620
AT1G05630
AT1G05680
AT1G05710
AT1G05750
AT1G05800
AT1G05805
AT1G05835
AT1G05840
AT1G05850
AT1G05870
AT1G05950
AT1G05970
AT1G06000
AT1G06040
AT1G06070
AT1G06080
AT1G06110
AT1G06130
AT1G06148
AT1G06149
AT1G06160
AT1G06180
AT1G06200
AT1G06270
AT1G06290
AT1G06310
AT1G06330
AT1G06360
AT1G06370
AT1G06390
AT1G06400
AT1G06410
AT1G06475
AT1G06480
AT1G06510
AT1G06520
AT1G06530
AT1G06570
AT1G06640
AT1G06680
AT1G06700
AT1G06740
AT1G06760
AT1G06770
AT1G06780
AT1G06800
AT1G06840
AT1G06850
AT1G06980
AT1G06990
AT1G07030
AT1G07040
AT1G07090
AT1G07100
AT1G07110
AT1G07128
AT1G07135
AT1G07175
AT1G07180
AT1G07200
AT1G07220
AT1G07230
AT1G07280
AT1G07310
AT1G07350
AT1G07360
AT1G07390
AT1G07400
AT1G07420
AT1G07430
AT1G07480
AT1G07485
AT1G07500
AT1G07520
AT1G07530
AT1G07540
AT1G07570
AT1G07580
AT1G07590
AT1G07630
AT1G07640
AT1G07645
AT1G07670
AT1G07710
AT1G07720
AT1G07760
AT1G07770
AT1G07820
AT1G07870
AT1G07885
AT1G07900
AT1G07910
AT1G07930
AT1G07940
AT1G07980
AT1G07990
AT1G08030
AT1G08040
AT1G08080
AT1G08090
AT1G08100
AT1G08115
AT1G08130
AT1G08170
AT1G08190
AT1G08200
AT1G08210
AT1G08230
AT1G08250
AT1G08315
AT1G08320
AT1G08340
AT1G08380
AT1G08420
AT1G08440
AT1G08450
AT1G08470
AT1G08490
AT1G08500
AT1G08510
AT1G08570
AT1G08630
AT1G08640
AT1G08680
AT1G08695
AT1G08720
AT1G08760
AT1G08820
AT1G08860
AT1G08870
AT1G08910
AT1G08920
AT1G08930
AT1G08940
AT1G08950
AT1G08970
AT1G08990
AT1G09010
AT1G09040
AT1G09070
AT1G09130
AT1G09155
AT1G09160
AT1G09200
AT1G09210
AT1G09230
AT1G09250
AT1G09310
AT1G09350
AT1G09380
AT1G09390
AT1G09420
AT1G09440
AT1G09460
AT1G09470
AT1G09500
AT1G09520
AT1G09530
AT1G09540
AT1G09560
AT1G09570
AT1G09580
AT1G09630
AT1G09645
AT1G09750
AT1G09780
AT1G09800
AT1G09810
AT1G09880
AT1G09940
AT1G09970
AT1G09980
AT1G10020
AT1G10060
AT1G10070
AT1G10090
AT1G10120
AT1G10130
AT1G10180
AT1G10200
AT1G10220
AT1G10230
AT1G10240
AT1G10270
AT1G10280
AT1G10300
AT1G10350
AT1G10360
AT1G10380
AT1G10385
AT1G10390
AT1G10410
AT1G10417
AT1G10460
AT1G10470
AT1G10480
AT1G10490
AT1G10500
AT1G10530
AT1G10550
AT1G10590
AT1G10640
AT1G10650
AT1G10652
AT1G10657
AT1G10660
AT1G10682
AT1G10690
AT1G10700
AT1G10740
AT1G10747
AT1G10750
AT1G10760
AT1G10890
AT1G10920
AT1G10940
AT1G10960
AT1G10990
AT1G11060
AT1G11080
AT1G11090
AT1G11112
AT1G11120
AT1G11125
AT1G11130
AT1G11160
AT1G11170
AT1G11210
AT1G11220
AT1G11230
AT1G11240
AT1G11250
AT1G11260
AT1G11280
AT1G11310
AT1G11320
AT1G11330
AT1G11370
AT1G11390
AT1G11420
AT1G11440
AT1G11530
AT1G11545
AT1G11580
AT1G11590
AT1G11600
AT1G11630
AT1G11655
AT1G11660
AT1G11670
AT1G11680
AT1G11690
AT1G11700
AT1G11720
AT1G11735
AT1G11740
AT1G11770
AT1G11820
AT1G11840
AT1G11850
AT1G11910
AT1G11940
AT1G11950
AT1G11960
AT1G12000
AT1G12020
AT1G12030
AT1G12060
AT1G12070
AT1G12080
AT1G12090
AT1G12100
AT1G12110
AT1G12120
AT1G12190
AT1G12200
AT1G12210
AT1G12240
AT1G12270
AT1G12290
AT1G12330
AT1G12370
AT1G12380
AT1G12411
AT1G12420
AT1G12430
AT1G12440
AT1G12500
AT1G12550
AT1G12560
AT1G12580
AT1G12610
AT1G12640
AT1G12670
AT1G12710
AT1G12740
AT1G12750
AT1G12780
AT1G12800
AT1G12820
AT1G12845
AT1G12950
AT1G12980
AT1G12990
AT1G13020
AT1G13080
AT1G13090
AT1G13180
AT1G13195
AT1G13210
AT1G13240
AT1G13245
AT1G13250
AT1G13260
AT1G13280
AT1G13300
AT1G13310
AT1G13360
AT1G13370
AT1G13380
AT1G13390
AT1G13430
AT1G13440
AT1G13450
AT1G13470
AT1G13560
AT1G13570
AT1G13590
AT1G13605
AT1G13640
AT1G13690
AT1G13700
AT1G13710
AT1G13740
AT1G13750
AT1G13860
AT1G13930
AT1G13940
AT1G13950
AT1G13960
AT1G13980
AT1G13990
AT1G14000
AT1G14010
AT1G14040
AT1G14090
AT1G14120
AT1G14170
AT1G14200
AT1G14210
AT1G14230
AT1G14240
AT1G14260
AT1G14270
AT1G14290
AT1G14330
AT1G14340
AT1G14345
AT1G14350
AT1G14360
AT1G14400
AT1G14430
AT1G14440
AT1G14450
AT1G14460
AT1G14490
AT1G14520
AT1G14530
AT1G14560
AT1G14570
AT1G14580
AT1G14590
AT1G14600
AT1G14620
AT1G14685
AT1G14687
AT1G14690
AT1G14700
AT1G14710
AT1G14720
AT1G14740
AT1G14750
AT1G14770
AT1G14780
AT1G14820
AT1G14830
AT1G14840
AT1G14860
AT1G14870
AT1G14890
AT1G14900
AT1G14920
AT1G14950
AT1G14960
AT1G14970
AT1G14990
AT1G15040
AT1G15060
AT1G15090
AT1G15100
AT1G15110
AT1G15120
AT1G15125
AT1G15140
AT1G15165
AT1G15175
AT1G15190
AT1G15220
AT1G15230
AT1G15250
AT1G15290
AT1G15300
AT1G15340
AT1G15350
AT1G15360
AT1G15370
AT1G15380
AT1G15400
AT1G15420
AT1G15440
AT1G15460
AT1G15480
AT1G15490
AT1G15520
AT1G15530
AT1G15550
AT1G15570
AT1G15580
AT1G15670
AT1G15690
AT1G15720
AT1G15740
AT1G15750
AT1G15757
AT1G15800
AT1G15820
AT1G15840
AT1G15860
AT1G15940
AT1G15950
AT1G15960
AT1G15970
AT1G16000
AT1G16010
AT1G16060
AT1G16150
AT1G16170
AT1G16190
AT1G16240
AT1G16300
AT1G16360
AT1G16410
AT1G16460
AT1G16490
AT1G16500
AT1G16510
AT1G16515
AT1G16530
AT1G16660
AT1G16670
AT1G16705
AT1G16720
AT1G16730
AT1G16750
AT1G16820
AT1G16850
AT1G16870
AT1G16890
AT1G16916
AT1G16920
AT1G17040
AT1G17050
AT1G17060
AT1G17090
AT1G17130
AT1G17140
AT1G17147
AT1G17150
AT1G17180
AT1G17190
AT1G17200
AT1G17210
AT1G17230
AT1G17235
AT1G17290
AT1G17340
AT1G17345
AT1G17360
AT1G17370
AT1G17380
AT1G17400
AT1G17410
AT1G17420
AT1G17430
AT1G17440
AT1G17460
AT1G17495
AT1G17500
AT1G17510
AT1G17550
AT1G17560
AT1G17590
AT1G17615
AT1G17620
AT1G17710
AT1G17720
AT1G17744
AT1G17830
AT1G17850
AT1G17890
AT1G17920
AT1G17940
AT1G18100
AT1G18140
AT1G18150
AT1G18180
AT1G18190
AT1G18191
AT1G18200
AT1G18250
AT1G18260
AT1G18270
AT1G18290
AT1G18300
AT1G18330
AT1G18335
AT1G18382
AT1G18400
AT1G18410
AT1G18415
AT1G18460
AT1G18470
AT1G18500
AT1G18560
AT1G18570
AT1G18580
AT1G18610
AT1G18620
AT1G18640
AT1G18670
AT1G18710
AT1G18720
AT1G18740
AT1G18800
AT1G18820
AT1G18835
AT1G18840
AT1G18850
AT1G18870
AT1G18890
AT1G18900
AT1G18910
AT1G18940
AT1G18970
AT1G18990
AT1G19000
AT1G19010
AT1G19050
AT1G19110
AT1G19140
AT1G19180
AT1G19220
AT1G19230
AT1G19250
AT1G19270
AT1G19300
AT1G19310
AT1G19330
AT1G19350
AT1G19400
AT1G19430
AT1G19440
AT1G19460
AT1G19485
AT1G19490
AT1G19530
AT1G19540
AT1G19570
AT1G19610
AT1G19630
AT1G19640
AT1G19650
AT1G19660
AT1G19700
AT1G19720
AT1G19730
AT1G19770
AT1G19800
AT1G19830
AT1G19835
AT1G19840
AT1G19850
AT1G19870
AT1G19910
AT1G19920
AT1G19940
AT1G19950
AT1G19960
AT1G19968
AT1G19970
AT1G20010
AT1G20030
AT1G20070
AT1G20090
AT1G20100
AT1G20170
AT1G20190
AT1G20200
AT1G20220
AT1G20250
AT1G20270
AT1G20310
AT1G20330
AT1G20340
AT1G20370
AT1G20375
AT1G20380
AT1G20410
AT1G20440
AT1G20480
AT1G20490
AT1G20510
AT1G20540
AT1G20560
AT1G20575
AT1G20620
AT1G20630
AT1G20640
AT1G20650
AT1G20657
AT1G20670
AT1G20691
AT1G20696
AT1G20820
AT1G20823
AT1G20840
AT1G20860
AT1G20890
AT1G20900
AT1G20930
AT1G20967
AT1G20980
AT1G20990
AT1G21000
AT1G21010
AT1G21020
AT1G21050
AT1G21060
AT1G21070
AT1G21080
AT1G21090
AT1G21100
AT1G21110
AT1G21130
AT1G21140
AT1G21290
AT1G21310
AT1G21320
AT1G21360
AT1G21370
AT1G21380
AT1G21400
AT1G21410
AT1G21450
AT1G21460
AT1G21500
AT1G21520
AT1G21525
AT1G21580
AT1G21590
AT1G21640
AT1G21660
AT1G21670
AT1G21695
AT1G21730
AT1G21738
AT1G21750
AT1G21760
AT1G21770
AT1G21790
AT1G21830
AT1G21880
AT1G21890
AT1G21900
AT1G21910
AT1G21920
AT1G21950
AT1G21975
AT1G21980
AT1G21990
AT1G22030
AT1G22040
AT1G22050
AT1G22060
AT1G22070
AT1G22100
AT1G22160
AT1G22170
AT1G22180
AT1G22190
AT1G22220
AT1G22230
AT1G22250
AT1G22260
AT1G22310
AT1G22360
AT1G22400
AT1G22403
AT1G22410
AT1G22430
AT1G22460
AT1G22470
AT1G22510
AT1G22520
AT1G22530
AT1G22540
AT1G22570
AT1G22600
AT1G22610
AT1G22640
AT1G22650
AT1G22690
AT1G22710
AT1G22720
AT1G22740
AT1G22767
AT1G22790
AT1G22882
AT1G22910
AT1G22920
AT1G22930
AT1G22990
AT1G23000
AT1G23020
AT1G23030
AT1G23040
AT1G23050
AT1G23060
AT1G23070
AT1G23074
AT1G23080
AT1G23090
AT1G23100
AT1G23110
AT1G23170
AT1G23190
AT1G23205
AT1G23210
AT1G23220
AT1G23310
AT1G23330
AT1G23360
AT1G23380
AT1G23390
AT1G23440
AT1G23490
AT1G23560
AT1G23700
AT1G23710
AT1G23730
AT1G23740
AT1G23780
AT1G23820
AT1G23860
AT1G23880
AT1G23890
AT1G23910
AT1G23960
AT1G23980
AT1G23990
AT1G24000
AT1G24080
AT1G24095
AT1G24100
AT1G24120
AT1G24148
AT1G24150
AT1G24160
AT1G24170
AT1G24180
AT1G24260
AT1G24265
AT1G24340
AT1G24350
AT1G24440
AT1G24460
AT1G24530
AT1G24575
AT1G24600
AT1G24625
AT1G24792
AT1G25220
AT1G25240
AT1G25250
AT1G25260
AT1G25275
AT1G25280
AT1G25310
AT1G25320
AT1G25340
AT1G25350
AT1G25370
AT1G25375
AT1G25410
AT1G25422
AT1G25425
AT1G25440
AT1G25450
AT1G25460
AT1G25480
AT1G25500
AT1G25530
AT1G25540
AT1G25560
AT1G25570
AT1G25580
AT1G26090
AT1G26150
AT1G26200
AT1G26208
AT1G26230
AT1G26260
AT1G26270
AT1G26390
AT1G26410
AT1G26490
AT1G26558
AT1G26560
AT1G26570
AT1G26580
AT1G26590
AT1G26600
AT1G26620
AT1G26690
AT1G26720
AT1G26730
AT1G26770
AT1G26790
AT1G26800
AT1G26850
AT1G26900
AT1G26916
AT1G26920
AT1G26921
AT1G26930
AT1G26940
AT1G26945
AT1G26970
AT1G27030
AT1G27050
AT1G27070
AT1G27100
AT1G27120
AT1G27130
AT1G27170
AT1G27200
AT1G27210
AT1G27290
AT1G27330
AT1G27350
AT1G27360
AT1G27440
AT1G27460
AT1G27470
AT1G27510
AT1G27540
AT1G27600
AT1G27630
AT1G27640
AT1G27650
AT1G27660
AT1G27670
AT1G27690
AT1G27740
AT1G27750
AT1G27760
AT1G27840
AT1G27850
AT1G27930
AT1G27940
AT1G27950
AT1G28007
AT1G28050
AT1G28070
AT1G28080
AT1G28100
AT1G28110
AT1G28120
AT1G28130
AT1G28135
AT1G28180
AT1G28200
AT1G28230
AT1G28250
AT1G28260
AT1G28280
AT1G28310
AT1G28320
AT1G28330
AT1G28340
AT1G28360
AT1G28370
AT1G28375
AT1G28390
AT1G28395
AT1G28400
AT1G28410
AT1G28430
AT1G28447
AT1G28480
AT1G28580
AT1G28591
AT1G28600
AT1G28620
AT1G28630
AT1G28640
AT1G28650
AT1G28670
AT1G28690
AT1G28760
AT1G28960
AT1G29050
AT1G29060
AT1G29150
AT1G29170
AT1G29195
AT1G29230
AT1G29240
AT1G29270
AT1G29280
AT1G29290
AT1G29300
AT1G29330
AT1G29340
AT1G29390
AT1G29400
AT1G29470
AT1G29530
AT1G29600
AT1G29640
AT1G29650
AT1G29660
AT1G29670
AT1G29680
AT1G29690
AT1G29810
AT1G29840
AT1G29880
AT1G29900
AT1G29920
AT1G29930
AT1G29980
AT1G30010
AT1G30016
AT1G30020
AT1G30040
AT1G30050
AT1G30080
AT1G30100
AT1G30110
AT1G30120
AT1G30135
AT1G30190
AT1G30200
AT1G30220
AT1G30250
AT1G30260
AT1G30270
AT1G30280
AT1G30290
AT1G30320
AT1G30330
AT1G30340
AT1G30350
AT1G30360
AT1G30370
AT1G30400
AT1G30410
AT1G30450
AT1G30475
AT1G30490
AT1G30500
AT1G30530
AT1G30570
AT1G30620
AT1G30660
AT1G30690
AT1G30700
AT1G30720
AT1G30730
AT1G30757
AT1G30780
AT1G30810
AT1G30820
AT1G30825
AT1G30835
AT1G30840
AT1G30860
AT1G30900
AT1G31010
AT1G31030
AT1G31040
AT1G31070
AT1G31120
AT1G31130
AT1G31150
AT1G31173
AT1G31310
AT1G31320
AT1G31330
AT1G31350
AT1G31355
AT1G31358
AT1G31410
AT1G31550
AT1G31580
AT1G31650
AT1G31660
AT1G31710
AT1G31720
AT1G31730
AT1G31772
AT1G31790
AT1G31812
AT1G31830
AT1G31835
AT1G31850
AT1G31860
AT1G31880
AT1G31910
AT1G31940
AT1G32049
AT1G32060
AT1G32090
AT1G32100
AT1G32120
AT1G32150
AT1G32170
AT1G32180
AT1G32190
AT1G32200
AT1G32230
AT1G32240
AT1G32290
AT1G32360
AT1G32380
AT1G32400
AT1G32410
AT1G32450
AT1G32460
AT1G32530
AT1G32540
AT1G32550
AT1G32640
AT1G32650
AT1G32670
AT1G32680
AT1G32690
AT1G32700
AT1G32710
AT1G32730
AT1G32740
AT1G32770
AT1G32780
AT1G32860
AT1G32900
AT1G32930
AT1G33060
AT1G33110
AT1G33230
AT1G33240
AT1G33250
AT1G33260
AT1G33270
AT1G33280
AT1G33350
AT1G33420
AT1G33450
AT1G33560
AT1G33590
AT1G33600
AT1G33607
AT1G33610
AT1G33680
AT1G33700
AT1G33730
AT1G33760
AT1G33780
AT1G33785
AT1G33800
AT1G33810
AT1G33811
AT1G33960
AT1G33970
AT1G34000
AT1G34030
AT1G34210
AT1G34245
AT1G34315
AT1G34360
AT1G34370
AT1G34630
AT1G34670
AT1G35110
AT1G35140
AT1G35160
AT1G35190
AT1G35220
AT1G35320
AT1G35333
AT1G35350
AT1G35430
AT1G35460
AT1G35461
AT1G35510
AT1G35513
AT1G35516
AT1G35560
AT1G35570
AT1G35580
AT1G35614
AT1G35670
AT1G35730
AT1G35750
AT1G35780
AT1G35830
AT1G35910
AT1G36060
AT1G36070
AT1G36180
AT1G36370
AT1G37120
AT1G37130
AT1G37140
AT1G38140
AT1G41830
AT1G42420
AT1G42480
AT1G42490
AT1G42550
AT1G42990
AT1G43160
AT1G43670
AT1G43700
AT1G43800
AT1G43850
AT1G43886
AT1G43890
AT1G43980
AT1G44000
AT1G44080
AT1G44100
AT1G44170
AT1G44350
AT1G44446
AT1G44575
AT1G44750
AT1G44760
AT1G44790
AT1G44800
AT1G44810
AT1G44830
AT1G44890
AT1G45010
AT1G45130
AT1G45145
AT1G45160
AT1G45170
AT1G45207
AT1G45249
AT1G45474
AT1G45688
AT1G45976
AT1G46192
AT1G46264
AT1G46480
AT1G46554
AT1G46768
AT1G47128
AT1G47200
AT1G47240
AT1G47310
AT1G47330
AT1G47380
AT1G47480
AT1G47490
AT1G47497
AT1G47510
AT1G47520
AT1G47530
AT1G47560
AT1G47570
AT1G47578
AT1G47610
AT1G47720
AT1G47860
AT1G47970
AT1G47990
AT1G48000
AT1G48100
AT1G48110
AT1G48200
AT1G48240
AT1G48260
AT1G48280
AT1G48300
AT1G48315
AT1G48320
AT1G48330
AT1G48370
AT1G48410
AT1G48450
AT1G48480
AT1G48510
AT1G48580
AT1G48610
AT1G48620
AT1G48630
AT1G48745
AT1G48790
AT1G48870
AT1G48880
AT1G48953
AT1G49005
AT1G49032
AT1G49130
AT1G49160
AT1G49200
AT1G49240
AT1G49320
AT1G49435
AT1G49450
AT1G49500
AT1G49520
AT1G49580
AT1G49590
AT1G49600
AT1G49610
AT1G49620
AT1G49650
AT1G49710
AT1G49720
AT1G49730
AT1G49780
AT1G49832
AT1G49840
AT1G49850
AT1G49870
AT1G49890
AT1G50020
AT1G50040
AT1G50055
AT1G50100
AT1G50110
AT1G50280
AT1G50290
AT1G50320
AT1G50420
AT1G50460
AT1G50570
AT1G50575
AT1G50600
AT1G50630
AT1G50650
AT1G50660
AT1G50740
AT1G50840
AT1G50890
AT1G50990
AT1G51060
AT1G51090
AT1G51130
AT1G51140
AT1G51160
AT1G51170
AT1G51190
AT1G51210
AT1G51300
AT1G51355
AT1G51360
AT1G51400
AT1G51460
AT1G51470
AT1G51500
AT1G51530
AT1G51550
AT1G51660
AT1G51690
AT1G51700
AT1G51710
AT1G51760
AT1G51780
AT1G51790
AT1G51800
AT1G51940
AT1G51950
AT1G52080
AT1G52120
AT1G52140
AT1G52150
AT1G52185
AT1G52190
AT1G52220
AT1G52240
AT1G52280
AT1G52290
AT1G52300
AT1G52330
AT1G52340
AT1G52347
AT1G52410
AT1G52430
AT1G52450
AT1G52510
AT1G52565
AT1G52590
AT1G52615
AT1G52750
AT1G52760
AT1G52780
AT1G52855
AT1G52857
AT1G52860
AT1G52880
AT1G52890
AT1G52905
AT1G52990
AT1G53039
AT1G53040
AT1G53050
AT1G53070
AT1G53080
AT1G53130
AT1G53160
AT1G53163
AT1G53165
AT1G53170
AT1G53180
AT1G53190
AT1G53220
AT1G53230
AT1G53240
AT1G53280
AT1G53290
AT1G53300
AT1G53310
AT1G53320
AT1G53340
AT1G53380
AT1G53400
AT1G53430
AT1G53460
AT1G53500
AT1G53510
AT1G53541
AT1G53560
AT1G53580
AT1G53610
AT1G53620
AT1G53625
AT1G53640
AT1G53670
AT1G53690
AT1G53700
AT1G53730
AT1G53750
AT1G53770
AT1G53820
AT1G53830
AT1G53840
AT1G53850
AT1G53887
AT1G53920
AT1G54000
AT1G54010
AT1G54020
AT1G54030
AT1G54050
AT1G54070
AT1G54080
AT1G54090
AT1G54095
AT1G54100
AT1G54120
AT1G54130
AT1G54140
AT1G54160
AT1G54180
AT1G54200
AT1G54210
AT1G54320
AT1G54340
AT1G54385
AT1G54390
AT1G54450
AT1G54520
AT1G54575
AT1G54670
AT1G54690
AT1G54710
AT1G54740
AT1G54780
AT1G54820
AT1G54840
AT1G54990
AT1G55010
AT1G55020
AT1G55100
AT1G55110
AT1G55120
AT1G55140
AT1G55152
AT1G55205
AT1G55210
AT1G55250
AT1G55260
AT1G55265
AT1G55270
AT1G55300
AT1G55330
AT1G55340
AT1G55350
AT1G55360
AT1G55420
AT1G55440
AT1G55480
AT1G55510
AT1G55520
AT1G55530
AT1G55535
AT1G55550
AT1G55580
AT1G55604
AT1G55610
AT1G55660
AT1G55670
AT1G55690
AT1G55700
AT1G55730
AT1G55740
AT1G55750
AT1G55760
AT1G55820
AT1G55840
AT1G55880
AT1G55910
AT1G55920
AT1G56010
AT1G56020
AT1G56040
AT1G56080
AT1G56090
AT1G56120
AT1G56130
AT1G56140
AT1G56145
AT1G56150
AT1G56160
AT1G56165
AT1G56200
AT1G56210
AT1G56220
AT1G56230
AT1G56300
AT1G56310
AT1G56330
AT1G56340
AT1G56345
AT1G56430
AT1G56500
AT1G56510
AT1G56540
AT1G56550
AT1G56555
AT1G56580
AT1G56600
AT1G56630
AT1G56640
AT1G56650
AT1G56660
AT1G56670
AT1G56700
AT1G56720
AT1G57600
AT1G57610
AT1G57620
AT1G57680
AT1G57720
AT1G57770
AT1G57820
AT1G57840
AT1G58030
AT1G58080
AT1G58100
AT1G58110
AT1G58180
AT1G58200
AT1G58235
AT1G58250
AT1G58265
AT1G58270
AT1G58280
AT1G58290
AT1G58330
AT1G58340
AT1G58350
AT1G58360
AT1G58400
AT1G58410
AT1G58420
AT1G58440
AT1G58460
AT1G58470
AT1G58520
AT1G58602
AT1G59530
AT1G59630
AT1G59640
AT1G59650
AT1G59660
AT1G59740
AT1G59750
AT1G59820
AT1G59900
AT1G59910
AT1G59940
AT1G59950
AT1G59980
AT1G60010
AT1G60025
AT1G60050
AT1G60060
AT1G60140
AT1G60150
AT1G60160
AT1G60190
AT1G60270
AT1G60380
AT1G60420
AT1G60440
AT1G60550
AT1G60560
AT1G60590
AT1G60600
AT1G60610
AT1G60630
AT1G60660
AT1G60790
AT1G60800
AT1G60860
AT1G60890
AT1G60900
AT1G60940
AT1G60950
AT1G60989
AT1G61010
AT1G61050
AT1G61065
AT1G61100
AT1G61120
AT1G61130
AT1G61170
AT1G61210
AT1G61215
AT1G61224
AT1G61255
AT1G61260
AT1G61275
AT1G61340
AT1G61350
AT1G61353
AT1G61360
AT1G61370
AT1G61420
AT1G61450
AT1G61460
AT1G61520
AT1G61540
AT1G61650
AT1G61660
AT1G61667
AT1G61740
AT1G61770
AT1G61800
AT1G61810
AT1G61820
AT1G61840
AT1G61850
AT1G61870
AT1G61890
AT1G61900
AT1G61920
AT1G61930
AT1G61980
AT1G62030
AT1G62035
AT1G62040
AT1G62045
AT1G62050
AT1G62180
AT1G62290
AT1G62301
AT1G62305
AT1G62310
AT1G62330
AT1G62360
AT1G62370
AT1G62380
AT1G62410
AT1G62420
AT1G62422
AT1G62440
AT1G62460
AT1G62480
AT1G62490
AT1G62510
AT1G62520
AT1G62540
AT1G62560
AT1G62570
AT1G62580
AT1G62610
AT1G62640
AT1G62660
AT1G62710
AT1G62760
AT1G62780
AT1G62790
AT1G62810
AT1G62820
AT1G62870
AT1G62880
AT1G62950
AT1G62960
AT1G62970
AT1G62975
AT1G62990
AT1G63000
AT1G63005
AT1G63010
AT1G63020
AT1G63030
AT1G63040
AT1G63050
AT1G63090
AT1G63100
AT1G63120
AT1G63130
AT1G63170
AT1G63240
AT1G63245
AT1G63260
AT1G63290
AT1G63295
AT1G63300
AT1G63390
AT1G63420
AT1G63430
AT1G63440
AT1G63480
AT1G63650
AT1G63670
AT1G63680
AT1G63690
AT1G63700
AT1G63710
AT1G63720
AT1G63730
AT1G63750
AT1G63780
AT1G63800
AT1G63810
AT1G63820
AT1G63835
AT1G63850
AT1G63930
AT1G63940
AT1G63950
AT1G63970
AT1G64020
AT1G64040
AT1G64050
AT1G64060
AT1G64065
AT1G64080
AT1G64090
AT1G64105
AT1G64110
AT1G64140
AT1G64150
AT1G64180
AT1G64290
AT1G64370
AT1G64380
AT1G64385
AT1G64390
AT1G64405
AT1G64450
AT1G64470
AT1G64500
AT1G64530
AT1G64540
AT1G64585
AT1G64610
AT1G64618
AT1G64620
AT1G64625
AT1G64640
AT1G64660
AT1G64680
AT1G64710
AT1G64720
AT1G64760
AT1G64810
AT1G64850
AT1G64900
AT1G64910
AT1G64970
AT1G64980
AT1G64990
AT1G65010
AT1G65040
AT1G65070
AT1G65110
AT1G65180
AT1G65310
AT1G65320
AT1G65440
AT1G65480
AT1G65520
AT1G65560
AT1G65590
AT1G65610
AT1G65620
AT1G65700
AT1G65710
AT1G65720
AT1G65830
AT1G65890
AT1G65900
AT1G65920
AT1G65930
AT1G65950
AT1G65960
AT1G65980
AT1G65985
AT1G66070
AT1G66130
AT1G66140
AT1G66145
AT1G66150
AT1G66160
AT1G66180
AT1G66190
AT1G66200
AT1G66230
AT1G66240
AT1G66250
AT1G66260
AT1G66340
AT1G66345
AT1G66350
AT1G66360
AT1G66370
AT1G66380
AT1G66390
AT1G66400
AT1G66430
AT1G66475
AT1G66480
AT1G66553
AT1G66580
AT1G66600
AT1G66725
AT1G66760
AT1G66770
AT1G66783
AT1G66800
AT1G66810
AT1G66830
AT1G66890
AT1G66900
AT1G66940
AT1G67030
AT1G67040
AT1G67050
AT1G67070
AT1G67090
AT1G67100
AT1G67195
AT1G67230
AT1G67265
AT1G67300
AT1G67310
AT1G67328
[truncated: 7,736 more rows]

## Sheet: 419
	AT1G03880	CRB
	AT2G21490	LEA
	AT2G28610	WOX3
	AT2G35300	LEA18
	AT3G21720	ICL
	AT3G24650	ABI3
	AT3G26790	FUS3
	AT3G27660	OLEO4
	AT3G51810	EM1
	AT4G25140	OLEO1
	AT4G27140	2S1
	AT4G27160	2S3
	AT4G27170	2S4
	AT5G07200	GA20OX3
	AT5G07500	PEI1
	AT5G10140	FLC
	AT5G11320	YUC4
	AT5G13790	AGL15
	AT5G44120	CRA1
	AT5G45830	DOG1
	AT5G51210	OLEO3
	AT5G51760	AHG1
	AT5G57390	AIL5
	AT1G01480	ACS2
	AT1G01680	PUB54
	AT1G02230	NAC004
	AT1G02450	NIMIN-1
	AT1G02520	ABCB11
	AT1G02770	AT1G02770
	AT1G03106	AT1G03106
	AT1G03120	ATRAB28
	AT1G05420	OFP12
	AT1G05680	UGT74E2
	AT1G06080	ADS1
	AT1G07430	AIP1
	AT1G07645	ATDSI-1VOC
	AT1G08440	ALMT2
	AT1G11040	AT1G11040
	AT1G11170	AT1G11170
	AT1G11370	PME56
	AT1G12070	AT1G12070
	AT1G12550	HPR3
	AT1G13430	STO9
	AT1G14950	AT1G14950
	AT1G15840	AT1G15840
	AT1G18100	MFT
	AT1G19250	FMO1
	AT1G19960	AT1G19960
	AT1G20860	PHT1-8
	AT1G21310	EXT3
	AT1G21360	GLTP2
	AT1G22100	AT1G22100
	AT1G22110	AT1G22110
	AT1G22250	AT1G22250
	AT1G23000	AT1G23000
	AT1G23040	AT1G23040
	AT1G23140	AT1G23140
	AT1G23730	BCA3
	AT1G25410	IPT6
	AT1G25530	AT1G25530
	AT1G26380	AT1G26380
	AT1G26390	AT1G26390
	AT1G26410	AT1G26410
	AT1G26420	AT1G26420
	AT1G26560	BGLU40
	AT1G26590	AT1G26590
	AT1G28640	AT1G28640
	AT1G28650	AT1G28650
	AT1G29050	TBL38
	AT1G29195	AT1G29195
	AT1G29680	AT1G29680
	AT1G30100	NCED5
	AT1G30530	UGT78D1
	AT1G30660	T5I8.11
	AT1G32710	AT1G32710
	AT1G32860	AT1G32860
	AT1G32900	GBSS1
	AT1G33960	AIG1
	AT1G35910	TPPD
	AT1G36060	ERF055
	AT1G47510	AT5PTASE11
	AT1G47990	GA2OX4
	AT1G48000	MYB112
	AT1G50110	BCAT6
	AT1G51530	AT1G51530
	AT1G52110	AT1G52110
	AT1G53690	NRPB12L
	AT1G54020	AT1G54020
	AT1G54575	AT1G54575
	AT1G55700	AT1G55700
	AT1G58330	ZW2
	AT1G59950	AT1G59950
	AT1G60890	PIP5K8
	AT1G61800	GPT2
	AT1G62290	APA2
	AT1G62580	AT1G62580
	AT1G62710	bVPE
	AT1G62840	AT1G62840
	AT1G63020	NRPD1
	AT1G63440	HMA5
	AT1G64405	AT1G64405
	AT1G66360	AT1G66360
	AT1G66390	MYB90
	AT1G67100	LBD40
	AT1G67481	MIR839A
	AT1G68170	AT1G68170
	AT1G68320	MYB62
	AT1G68470	AT1G68470
	AT1G68510	LBD42
	AT1G70260	AT1G70260
	AT1G70440	SRO3
	AT1G70510	KNAT2
	AT1G71770	PAB5
	AT1G71890	SUC5
	AT1G72570	AIL1
	AT1G73220	AtOCT1
	AT1G73680	DOX2
	AT1G74000	SSL11
	AT1G74205	AT1G74205
	AT1G74990	AT1G74990
	AT1G75580	AT1G75580
	AT1G75830	PDF1.1
	AT1G76960	AT1G76960
	AT1G77120	ADH1
	AT1G77655	AT1G77655
	AT1G78390	NCED9
	AT1G80130	AT1G80130
	AT2G02120	PDF2.1
	AT2G02990	RNS1
	AT2G14247	AT2G14247
	AT2G14520	CBSDUF3
	AT2G16060	AHB1
	AT2G16890	UGT90A1
	AT2G19770	PRO4
	AT2G21780	AT2G21780
	AT2G21930	AT2G21930
	AT2G22180	AT2G22180
	AT2G22240	IPS2
	AT2G22810	ACS4
	AT2G23170	GH3.3
	AT2G24800	PER18
	AT2G25000	WRKY60
	AT2G25940	ALPHA-VPE
	AT2G26020	PDF1.2B
	AT2G26130	AT2G26130
	AT2G26310	FAP2
	AT2G26440	PME12
	AT2G26870	NPC2
	AT2G27240	ALMT7
	AT2G27990	BLH8
	AT2G30580	DRIP2
	AT2G30750	CYP71A12
	AT2G31180	ATMYB14
	AT2G31980	CYS2
	AT2G32460	MYB101
	AT2G32830	PHT1-5
	AT2G32960	AT2G32960
	AT2G33020	AtRLP24
	AT2G33070	NSP2
	AT2G33520	AT2G33520
	AT2G34185	AT2G34185
	AT2G34650	PID
	AT2G36210	AT2G36210
	AT2G36500	CBSCBSPB2
	AT2G36640	ATECP63
	AT2G37370	AT2G37370
	AT2G38180	AT2G38180
	AT2G38340	DREB2E
	AT2G38530	LTP2
	AT2G38823	AT2G38823
	AT2G38920	RF178
	AT2G39330	JAL23
	AT2G39350	ABCG1
	AT2G40030	NRPE1
	AT2G40100	LHCB4.3
	AT2G40220	ABI4
	AT2G40470	LBD15
	AT2G41070	DPBF4
	AT2G41225	AT2G41225
	AT2G41230	ORS1
	AT2G41360	AT2G41360
	AT2G41730	AT2G41730
	AT2G41810	AT2G41810
	AT2G41850	ADPG2
	AT2G42990	AT2G42990
	AT2G43000	JUB1
	AT2G43570	CHI
	AT2G44460	BGLU28
	AT2G44470	BGLU29
	AT2G44800	AT2G44800
	AT2G44910	ATHB-4
	AT2G45210	SAUR36
	AT2G45290	TKL-2
	AT2G45360	AT2G45360
	AT2G45900	AT2G45900
	AT2G46950	CYP709B2
	AT2G46990	IAA20
	AT2G47050	AT2G47050
	AT2G47260	WRKY23
	AT2G47520	ERF071
	AT3G02410	ICMEL2
	AT3G03341	AT3G03341
	AT3G03670	PER28
	AT3G04380	SUVR4
	AT3G05150	AT3G05150
	AT3G05630	PLDP2
	AT3G05980	AT3G05980
	AT3G10040	AT3G10040
	AT3G11165	AT3G11165
	AT3G11260	WOX5
	AT3G12500	CHI-B
	AT3G13130	AT3G13130
	AT3G13437	AT3G13437
	AT3G14300	PME26
	AT3G14360	AT3G14360
	AT3G15370	EXPA12
	AT3G15670	AT3G15670
	AT3G16150	AT3G16150
	AT3G17520	AT3G17520
	AT3G17790	PAP17
	AT3G17820	GLN1-3
	AT3G18250	AT3G18250
	AT3G18280	AT3G18280
	AT3G19500	BHLH113
	AT3G21500	DXPS1
	AT3G21560	UGT84A2
	AT3G21860	ASK10
	AT3G22550	AT3G22550
	AT3G22560	AT3G22560
	AT3G23870	AT3G23870
	AT3G24450	AT3G24450
	AT3G25795	AT3G25795
	AT3G25905	CLE27
	AT3G27025	AT3G27025
	AT3G27220	AT3G27220
	AT3G27250	AT3G27250
	AT3G27400	AT3G27400
	AT3G27415	AT3G27415
	AT3G28150	AXY4L
	AT3G42670	CLSY1
	AT3G44310	NIT1
	AT3G44350	NAC061
	AT3G44460	DPBF2
	AT3G44830	PDAT2
	AT3G47420	ATPS3
	AT3G48510	AT3G48510
	AT3G48850	MPT2
	AT3G49620	DIN11
	AT3G50030	AT3G50030
	AT3G52770	ZPR3
	AT3G52780	PAP20
	AT3G53232	RTFL1
	AT3G53690	AT3G53690
	AT3G54510	AT3G54510
	AT3G54820	PIP2-5
	AT3G54940	AT3G54940
	AT3G55240	AT3G55240
	AT3G56220	AT3G56220
	AT3G57510	ADPG1
	AT3G57780	AT3G57780
	AT3G58060	MTPC3
	AT3G58780	AGL1
	AT3G60140	BGLU30
	AT3G60540	AT3G60540
	AT3G62610	ATMYB11
	AT4G01985	AT4G01985
	AT4G02330	PME41
	AT4G02360	AT4G02360
	AT4G02780	GA1
	AT4G03050	AOP3
	AT4G03320	TIC20-IV
	AT4G03450	AT4G03450
	AT4G05030	AT4G05030
	AT4G05110	ENT6
	AT4G10020	HSD5
	AT4G10270	AT4G10270
	AT4G10490	AT4G10490
	AT4G11040	AT4G11040
	AT4G11350	AT4G11350
	AT4G12210	AT4G12210
	AT4G12470	AZI1
	AT4G12490	AT4G12490
	AT4G12735	AT4G12735
	AT4G14640	CML8
	AT4G14780	AT4G14780
	AT4G14980	AT4G14980
	AT4G15210	BAM5
	AT4G15396	CYP702A6
	AT4G16620	AT4G16620
	AT4G16820	PLA-I{beta]2
	AT4G18170	WRKY28
	AT4G18350	NCED2
	AT4G18360	GLO5
	AT4G18650	AT4G18650
	AT4G19810	AT4G19810
	AT4G21500	AT4G21500
	AT4G21680	NPF7.2
	AT4G22730	AT4G22730
	AT4G23680	AT4G23680
	AT4G24000	CSLG2
	AT4G24260	KOR3
	AT4G25980	PER43
	AT4G26590	OPT5
	AT4G27250	AT4G27250
	AT4G27810	AT4G27810
	AT4G27970	SLAH2
	AT4G28390	AAC3
	AT4G28530	anac074
	AT4G28790	BHLH23
	AT4G29240	AT4G29240
	AT4G31615	REM2
	AT4G31830	AT4G31830
	AT4G31877	MIR156C
	AT4G31970	CYP82C2
	AT4G32295	AT4G32295
	AT4G32460	AT4G32460
	AT4G32810	CCD8
	AT4G33040	GRXC6
	AT4G33070	PDC1
	AT4G34320	AT4G34320
	AT4G34860	INVB
	AT4G35070	AT4G35070
	AT4G36700	AT4G36700
	AT4G37990	CAD8
	AT4G39210	APL3
	AT4G39700	AT4G39700
	AT5G01300	AT5G01300
	AT5G01660	AT5G01660
	AT5G01820	CIPK14
	AT5G02420	SMR3
	AT5G02580	AT5G02580
	AT5G02760	AT5G02760
	AT5G03668	AT5G03668
	AT5G03670	AT5G03670
	AT5G03795	AT5G03795
	AT5G04500	AT5G04500
	AT5G06720	PER53
	AT5G07190	ATS3
	AT5G07310	ERF115
	AT5G07330	AT5G07330
	AT5G07530	GRP17
	AT5G09470	PUMP6
	AT5G09540	AT5G09540
	AT5G09970	CYP78A7
	AT5G11100	SYT4
	AT5G12330	LRP1
	AT5G13170	SWEET15
	AT5G13330	ERF113
	AT5G15120	PCO1
	AT5G16460	AT5G16460
	AT5G17810	WOX12
	AT5G18320	PUB46
	AT5G18450	DREB2G
	AT5G19880	PER58
	AT5G20635	GG3
	AT5G20790	AT5G20790
	AT5G20810	AT5G20810
	AT5G21280	AT5G21280
	AT5G22300	NIT4
	AT5G22460	AT5G22460
	AT5G22500	FAR1
	AT5G22580	AT5G22580
	AT5G24130	AT5G24130
	AT5G24560	PP2B12
	AT5G24655	LSU4
	AT5G25180	CYP71B14
	AT5G25190	ERF003
	AT5G25470	AT5G25470
	AT5G25820	AT5G25820
	AT5G27060	AtRLP53
	AT5G27360	SFP2
	AT5G27630	ACBP5
	AT5G28020	CYSD2
	AT5G38900	AT5G38900
	AT5G39720	AIG2L
	AT5G39890	PCO2
	AT5G41460	AT5G41460
	AT5G41610	CHX18
	AT5G42530	AT5G42530
	AT5G42830	AT5G42830
	AT5G43860	CLH2
	AT5G44220	AT5G44220
	AT5G44360	AT5G44360
	AT5G44420	PDF1.2A
	AT5G44700	GSO2
	AT5G47060	AT5G47060
	AT5G49330	MYB111
	AT5G49690	UGT91C1
	AT5G50260	CEP1
	AT5G50330	AT5G50330
	AT5G50360	AT5G50360
	AT5G51850	AT5G51850
	AT5G53420	AT5G53420
	AT5G53820	AT5G53820
	AT5G53870	ENODL1
	AT5G54300	AT5G54300
	AT5G55250	IAMT1
	AT5G55620	AT5G55620
	AT5G56300	GAMT2
	AT5G56510	APUM12
	AT5G57123	AT5G57123
	AT5G57785	AT5G57785
	AT5G57790	AT5G57790
	AT5G59170	AT5G59170
	AT5G59220	HAI1
	AT5G60460	AT5G60460
	AT5G60760	AT5G60760
	AT5G61610	AT5G61610
	AT5G61890	ERF114
	AT5G62230	ERL1
	AT5G62800	AT5G62800
	AT5G63087	AT5G63087
	AT5G63350	AT5G63350
	AT5G64120	PER71
	AT5G64530	ANAC104
	AT5G65100	EIL5
	AT5G65165	SDH2-3
	AT5G65510	AIL7
	AT3G01570	AT3G01570

## Sheet: 613
	AT4G27170	2S4
	AT4G27160	2S3
	AT1G03880	CRB
	AT5G54740	SESA5
	AT5G44120	CRA1
	AT4G25140	OLEO1
	AT4G27150	2S2
	AT5G40420	OLEO2
	AT4G27140	2S1
	AT4G26740	PXG1
	AT3G24650	ABI3
	AT1G67100	LBD40
	AT1G03890	CRD
	AT5G51210	OLEO3
	AT2G40220	ABI4
	AT2G41280	M10
	AT3G21720	ICL
	AT5G07500	PEI1
	AT2G21490	LEA
	AT1G03790	SOM
	AT3G27660	OLEO4
	AT5G06760	LEA4-5
	AT2G35300	LEA18
	AT3G44460	DPBF2
	AT5G51760	AHG1
	AT5G47670	L1L
	AT5G45830	DOG1
	AT4G31615	REM2
	AT1G21970	LEC1
	AT1G48130	PER1
	AT1G18100	MFT
	AT3G26790	FUS3
	AT5G11320	YUC4
	AT5G10140	FLC
	AT5G17810	WOX12
	AT5G57390	AIL5
	AT5G65510	AIL7
	AT5G13790	AGL15
	AT1G30100	NCED5
	AT5G17430	BBM
	AT1G47540	ATTI7
	AT2G28490	AT2G28490
	AT4G36700	AT4G36700
	AT3G54940	AT3G54940
	AT1G74140	AT1G74140
	AT1G65090	AT1G65090
	AT1G04660	AT1G04660
	AT1G04560	AT1G04560
	AT1G54860	AT1G54860
	AT3G63040	AT3G63040
	AT5G45690	AT5G45690
	AT4G31900	PKR2
	AT3G56350	MSD2
	AT5G22470	PARP3
	AT1G78500	PEN6
	AT2G44470	BGLU29
	AT1G75830	PDF1.1
	AT3G15670	AT3G15670
	AT2G34700	AT2G34700
	AT1G03106	AT1G03106
	AT3G21370	BGLU19
	AT5G24130	AT5G24130
	AT4G34520	FAE1
	AT5G62800	AT5G62800
	AT1G48470	GLN1-5
	AT4G21020	AT4G21020
	AT1G17810	TIP3-2
	AT5G55240	PXG2
	AT2G18540	AT2G18540
	AT4G03050	AOP3
	AT1G73190	TIP3-1
	AT3G12203	SCPL17
	AT1G77655	AT1G77655
	AT5G44360	AT5G44360
	AT1G27461	AT1G27461
	AT2G05580	AT2G05580
	AT4G31830	AT4G31830
	AT1G07645	ATDSI-1VOC
	AT1G05510	AT1G05510
	AT2G23510	SDT
	AT1G48990	AT1G48990
	AT4G39130	AT4G39130
	AT5G07190	ATS3
	AT1G77950	AGL67
	AT5G07550	GRP19
	AT3G20210	dVPE
	AT4G10020	HSD5
	AT2G36640	ATECP63
	AT1G48800	TPS28
	AT5G03820	AT5G03820
	AT5G44220	AT5G44220
	AT3G22640	PAP85
	AT2G34870	MEE26
	AT4G18650	AT4G18650
	AT5G55410	AT5G55410
	AT4G01985	AT4G01985
	AT1G32710	AT1G32710
	AT3G01570	AT3G01570
	AT1G49330	AT1G49330
	AT2G41360	AT2G41360
	AT4G11040	AT4G11040
	AT2G26010	PDF1.3
	AT5G50360	AT5G50360
	AT1G70260	AT1G70260
	AT2G38905	AT2G38905
	AT1G52690	AT1G52690
	AT3G29385	AT3G29385
	AT3G18570	AT3G18570
	AT5G04380	AT5G04380
	AT1G28640	AT1G28640
	AT5G16460	AT5G16460
	AT5G04500	AT5G04500
	AT2G33520	AT2G33520
	AT4G10850	SWEET7
	AT5G24950	CYP71A15
	AT2G33070	NSP2
	AT1G02770	AT1G02770
	AT5G22810	AT5G22810
	AT1G12064	AT1G12064
	AT3G48270	CYP71A26
	AT4G18680	AT4G18680
	AT5G09640	SCPL19
	AT4G33720	AT4G33720
	AT1G62290	APA2
	AT5G60470	IDD13
	AT1G11370	PME56
	AT5G50770	HSD6
	AT1G25410	IPT6
	AT1G68510	LBD42
	AT2G38920	RF178
	AT2G39330	JAL23
	AT5G22460	AT5G22460
	AT3G28610	AT3G28610
	AT1G12070	AT1G12070
	AT4G39480	CYP96A9
	AT3G55240	AT3G55240
	AT5G24860	FPF1
	AT4G37990	CAD8
	AT5G25180	CYP71B14
	AT1G72570	AIL1
	AT4G05110	ENT6
	AT1G80130	AT1G80130
	AT1G22100	AT1G22100
	AT1G69880	TRX8
	AT5G59170	AT5G59170
	AT3G27250	AT3G27250
	AT4G15370	BARS1
	AT1G22015	B3GALT5
	AT1G68320	MYB62
	AT2G22180	AT2G22180
	AT5G55750	AT5G55750
	AT3G28415	ABCB22
	AT4G14080	A6
	AT1G29680	AT1G29680
	AT4G15210	BAM5
	AT5G07330	AT5G07330
	AT5G10120	EIL4
	AT2G20470	AT2G20470
	AT5G65165	SDH2-3
	AT5G18450	DREB2G
	AT2G47050	AT2G47050
	AT2G41225	AT2G41225
	AT5G07200	GA20OX3
	AT2G30770	CYP71A13
	AT2G25150	SCT
	AT2G26020	PDF1.2B
	AT2G24800	PER18
	AT5G25470	AT5G25470
	AT5G53820	AT5G53820
	AT2G38530	LTP2
	AT1G63070	AT1G63070
	AT1G28650	AT1G28650
	AT3G21860	ASK10
	AT4G33070	PDC1
	AT1G56100	AT1G56100
	AT5G03795	AT5G03795
	AT1G64405	AT1G64405
	AT5G57123	AT5G57123
	AT1G26410	AT1G26410
	AT4G18920	AT4G18920
	AT1G68170	AT1G68170
	AT3G58740	CSY1
	AT1G71691	AT1G71691
	AT4G28365	ENODL3
	AT2G19770	PRO4
	AT4G33280	REM16
	AT5G42530	AT5G42530
	AT1G73040	JAL19
	AT4G12210	AT4G12210
	AT1G60090	BGLU4
	AT1G30920	AT1G30920
	AT3G13130	AT3G13130
	AT4G14780	AT4G14780
	AT3G25905	CLE27
	AT3G27415	AT3G27415
	AT2G47520	ERF071
	AT2G23230	TPS05
	AT2G28420	AT2G28420
	AT5G07510	GRP14
	AT5G44440	AT5G44440
	AT2G47780	AT2G47780
	AT3G29260	SDR5
	AT1G62710	bVPE
	AT5G07530	GRP17
	AT4G10270	AT4G10270
	AT5G09360	LAC14
	AT1G24580	AT1G24580
	AT4G12500	AT4G12500
	AT1G61800	GPT2
	AT4G12470	AZI1
	AT2G42990	AT2G42990
	AT5G19880	PER58
	AT3G57510	ADPG1
	AT3G54510	AT3G54510
	AT2G01770	VIT1
	AT2G02990	RNS1
	AT5G24240	PI4KG3
	AT4G26460	AT4G26460
	AT5G24560	PP2B12
	AT3G60730	PME36
	AT1G20860	PHT1-8
	AT5G39890	PCO2
	AT3G44830	PDAT2
	AT4G32810	CCD8
	AT5G63350	AT5G63350
	AT1G74990	AT1G74990
	AT5G61610	AT5G61610
	AT5G05390	LAC12
	AT2G36660	PAB7
	AT3G03230	AT3G03230
	AT4G32490	ENODL4
	AT3G52780	PAP20
	AT1G63210	AT1G63210
	AT5G44420	PDF1.2A
	AT3G03670	PER28
	AT5G50260	CEP1
	AT1G73220	45931
	AT1G60970	AT1G60970
	AT1G74000	SSL11
	AT3G11260	WOX5
	AT1G13620	RGF2
	AT5G44630	BS
	AT1G26590	AT1G26590
	AT4G17980	anac071
	AT1G29100	AT1G29100
	AT2G38340	DREB2E
	AT4G32500	AKT5
	AT4G04760	AT4G04760
	AT5G52160	AT5G52160
	AT2G26130	AT2G26130
	AT3G18250	AT3G18250
	AT5G18320	PUB46
	AT4G00380	FDM2
	AT3G05150	AT3G05150
	AT4G36280	AT4G36280
	AT1G70440	SRO3
	AT1G06080	ADS1
	AT1G22250	AT1G22250
	AT2G14520	CBSDUF3
	AT5G53870	ENODL1
	AT1G10680	ABCB10
	AT4G30880	AT4G30880
	AT5G38900	AT5G38900
	AT5G02760	AT5G02760
	AT5G03860	MLS
	AT4G12490	AT4G12490
	AT1G77100	PER13
	AT1G30220	INT2
	AT2G32830	PHT1-5
	AT5G56300	GAMT2
	AT5G56510	APUM12
	AT4G33560	AT4G33560
	AT1G57800	ORTH3
	AT3G23460	AT3G23460
	AT4G05030	AT4G05030
	AT4G32510	BOR7
	AT1G58330	ZW2
	AT5G27630	ACBP5
	AT5G41460	AT5G41460
	AT4G39210	APL3
	AT2G30750	CYP71A12
	AT2G44460	BGLU28
	AT1G67770	TEL2
	AT4G15396	CYP702A6
	AT5G09540	AT5G09540
	AT5G61890	ERF114
	AT2G37370	AT2G37370
	AT3G21500	DXPS1
	AT5G09970	CYP78A7
	AT5G24080	AT5G24080
	AT2G40790	CXXS2
	AT4G27590	AT4G27590
	AT1G23201	AT1G23201
	AT1G24010	AT1G24010
	AT5G51850	AT5G51850
	AT2G41230	ORS1
	AT5G26805	AT5G26805
	AT5G42830	AT5G42830
	AT5G22580	AT5G22580
	AT4G29305	LCR25
	AT5G20790	AT5G20790
	AT5G55250	IAMT1
	AT5G13170	SWEET15
	AT5G07310	ERF115
	AT3G58060	MTPC3
	AT3G53232	RTFL1
	AT1G19960	AT1G19960
	AT4G36430	PER49
	AT3G44290	NAC60
	AT5G65100	EIL5
	AT1G08650	PPCK1
	AT3G14300	PME26
	AT1G35910	TPPD
	AT5G64530	ANAC104
	AT1G76470	AT1G76470
	AT4G19810	AT4G19810
	AT3G57950	AT3G57950
	AT3G09400	PLL3
	AT1G71890	SUC5
	AT1G07430	AIP1
	AT5G55490	GEX1
	AT2G31180	ATMYB14
	AT4G14980	AT4G14980
	AT1G21360	GLTP2
	AT4G02780	GA1
	AT2G36210	AT2G36210
	AT1G05420	OFP12
	AT5G64080	AT5G64080
	AT2G27240	ALMT7
	AT5G11100	SYT4
	AT5G49330	MYB111
	AT2G02120	PDF2.1
	AT3G05630	PLDP2
	AT1G30660	T5I8.11
	AT4G10265	AT4G10265
	AT5G15120	PCO1
	AT5G14860	AT5G14860
	AT4G11650	OSM34
	AT1G66360	AT1G66360
	AT1G62530	AT1G62530
	AT1G26240	AT1G26240
	AT5G44700	GSO2
	AT2G42430	LBD16
	AT1G02450	NIMIN-1
	AT3G53690	AT3G53690
	AT2G16890	UGT90A1
	AT4G33040	GRXC6
	AT5G09470	PUMP6
	AT5G39720	AIG2L
	AT3G57240	BG3
	AT5G20810	AT5G20810
	AT1G26560	BGLU40
	AT5G59220	HAI1
	AT2G23170	GH3.3
	AT1G13430	STO9
	AT3G48850	MPT2
	AT2G26870	NPC2
	AT3G15370	EXPA12
	AT2G43000	JUB1
	AT4G16260	AT4G16260
	AT4G16620	AT4G16620
	AT2G40030	NRPE1
	AT3G22550	AT3G22550
	AT3G19500	BHLH113
	AT3G10200	AT3G10200
	AT2G28610	WOX3
	AT4G23720	AT4G23720
	AT1G71690	AT1G71690
	AT2G25510	AT2G25510
	AT2G44910	ATHB-4
	AT4G23600	CORI3
	AT2G44800	AT2G44800
	AT2G45135	AT2G45135
	AT3G47420	ATPS3
	AT3G14360	AT3G14360
	AT1G53690	NRPB12L
	AT3G21351	AT3G21351
	AT3G21352	AT3G21352
	AT5G03668	AT5G03668
	AT4G27250	AT4G27250
	AT1G62580	AT1G62580
	AT1G12890	ERF088
	AT1G48000	MYB112
	AT1G52110	AT1G52110
	AT3G45130	LAS1
	AT3G07120	AT3G07120
	AT5G57785	AT5G57785
	AT1G66390	MYB90
	AT4G12480	EARLI1
	AT1G11170	AT1G11170
	AT2G46990	IAA20
	AT3G27400	AT3G27400
	AT1G22210	TPPC
	AT4G32460	AT4G32460
	AT4G14390	AT4G14390
	AT2G21780	AT2G21780
	AT3G58780	AGL1
	AT5G05290	EXPA2
	AT1G27040	NPF4.5
	AT2G45360	AT2G45360
	AT1G69490	NAC029
	AT2G45290	TKL-2
	AT1G33960	AIG1
	AT2G15780	AT2G15780
	AT1G30530	UGT78D1
	AT5G20420	CLSY2
	AT3G02410	ICMEL2
	AT3G42670	CLSY1
	AT1G29090	AT1G29090
	AT1G21850	sks8
	AT2G32460	MYB101
	AT4G27810	AT4G27810
	AT4G22880	LDOX
	AT2G33020	AtRLP24
	AT1G12600	UTR4
	AT1G68470	AT1G68470
	AT1G23040	AT1G23040
	AT3G29590	5MAT
	AT2G41850	ADPG2
	AT4G21500	AT4G21500
	AT3G22560	AT3G22560
	AT3G48510	AT3G48510
	AT3G17790	PAP17
	AT3G14395	AT3G14395
	AT3G27025	AT3G27025
	AT2G26440	PME12
	AT2G44590	DRP1D
	AT5G25190	ERF003
	AT1G67481	MIR839A
	AT5G65230	AtMYB53
	AT2G40100	LHCB4.3
	AT5G24655	LSU4
	AT3G49620	DIN11
	AT1G56170	NFYC2
	AT1G10370	GSTU17
	AT2G25000	WRKY60
	AT3G60140	BGLU30
	AT1G68765	IDA
	AT4G29240	AT4G29240
	AT4G28530	anac074
	AT5G06720	PER53
	AT5G38790	AT5G38790
	AT2G18150	PER15
	AT5G60460	AT5G60460
	AT5G55620	AT5G55620
	AT1G68240	BHLH109
	AT3G06360	AGP27
	AT1G25530	AT1G25530
	AT2G45900	AT2G45900
	AT4G16820	PLA-I{beta]2
	AT1G32860	AT1G32860
	AT5G49690	UGT91C1
	AT2G41070	DPBF4
	AT4G34860	INVB
	AT1G52400	BGLU18
	AT4G21380	SD18
	AT5G43860	CLH2
	AT1G21310	EXT3
	AT3G57380	AT3G57380
	AT5G22500	FAR1
	AT3G60540	AT3G60540
	AT1G50110	BCAT6
	AT2G39350	ABCG1
	AT1G70510	KNAT2
	AT3G11180	AT3G11180
	AT4G18350	NCED2
	AT2G21930	AT2G21930
	AT1G14630	AT1G14630
	AT2G36500	CBSCBSPB2
	AT3G05980	AT3G05980
	AT5G41610	CHX18
	AT1G54575	AT1G54575
	AT1G51530	AT1G51530
	AT2G34185	AT2G34185
	AT3G04380	SUVR4
	AT3G28150	AXY4L
	AT4G12735	AT4G12735
	AT4G31970	CYP82C2
	AT2G31420	AT2G31420
	AT2G35550	BPC7
	AT1G62620	AT1G62620
	AT3G61930	AT3G61930
	AT3G21560	UGT84A2
	AT5G47060	AT5G47060
	AT2G24010	scpl23
	AT1G47510	AT5PTASE11
	AT2G45210	SAUR36
	AT3G21090	ABCG15
	AT4G25980	PER43
	AT2G26310	FAP2
	AT2G22810	ACS4
	AT4G10490	AT4G10490
	AT2G30580	DRIP2
	AT5G54300	AT5G54300
	AT4G03450	AT4G03450
	AT1G26380	AT1G26380
	AT5G53420	AT5G53420
	AT1G32900	GBSS1
	AT3G16150	AT3G16150
	AT1G01480	ACS2
	AT1G08440	ALMT2
	AT4G15270	AT4G15270
	AT4G11350	AT4G11350
	AT5G22300	NIT4
	AT5G64120	PER71
	AT5G44306	AT5G44306
	AT1G23140	AT1G23140
	AT3G24340	CLSY4
	AT1G60890	PIP5K8
	AT5G02580	AT5G02580
	AT5G63087	AT5G63087
	AT3G18280	AT3G18280
	AT4G22730	AT4G22730
	AT3G16980	NRPB9A
	AT1G47990	GA2OX4
	AT1G62840	AT1G62840
	AT2G32960	AT2G32960
	AT5G27360	SFP2
	AT4G39700	AT4G39700
	AT3G23870	AT3G23870
	AT1G77920	TGA7
	AT2G40470	LBD15
	AT3G54820	PIP2-5
	AT1G29050	TBL38
	AT5G01660	AT5G01660
	AT4G21326	ATSBT3.12
	AT2G27990	BLH8
	AT3G52770	ZPR3
	AT5G12330	LRP1
	AT1G23550	SRO2
	AT3G44350	NAC061
	AT5G25820	AT5G25820
	AT3G12500	CHI-B
	AT2G36695	AT2G36695
	AT1G59670	GSTU15
	AT1G14390	AT1G14390
	AT4G28790	BHLH23
	AT3G24450	AT3G24450
	AT5G39100	GLP6
	AT3G04720	HEL
	AT1G59950	AT1G59950
	AT1G63020	NRPD1
	AT5G13330	ERF113
	AT1G79360	45932
	AT2G46950	CYP709B2
	AT2G41730	AT2G41730
	AT5G55360	AT3
	AT1G26420	AT1G26420
	AT4G02330	PME41
	AT2G29350	SAG13
	AT5G03670	AT5G03670
	AT4G27970	SLAH2
	AT5G60760	AT5G60760
	AT2G25940	ALPHA-VPE
	AT1G09960	SUC4
	AT1G54020	AT1G54020
	AT4G34320	AT4G34320
	AT2G22240	IPS2
	AT5G48670	AGL80
	AT5G16980	AT5G16980
	AT2G35160	SUVH5
	AT5G28020	CYSD2
	AT2G47260	WRKY23
	AT5G62230	ERL1
	AT5G20635	GG3
	AT5G24205	AT5G24205
	AT1G78390	NCED9
	AT4G02360	AT4G02360
	AT4G18170	WRKY28
	AT4G21680	NPF7.2
	AT1G63440	HMA5
	AT1G02230	NAC004
	AT5G50330	AT5G50330
	AT5G35960	AT5G35960
	AT1G36060	ERF055
	AT1G23000	AT1G23000
	AT5G52640	HSP81-1
	AT1G73010	PS2
	AT3G25795	AT3G25795
	AT5G21280	AT5G21280
	AT4G12580	AT4G12580
	AT4G35070	AT4G35070
	AT3G27220	AT3G27220
	AT1G55700	AT1G55700
	AT5G57790	AT5G57790
	AT5G64810	WRKY51
	AT3G13437	AT3G13437
	AT1G05680	UGT74E2
	AT5G01820	CIPK14
	AT3G04660	AT3G04660
	AT1G75580	AT1G75580
	AT1G74205	AT1G74205
	AT2G43570	CHI
	AT2G34650	PID
	AT1G19250	FMO1
	AT1G03120	ATRAB28
	AT1G12550	HPR3
	AT4G14640	CML8
	AT4G32295	AT4G32295
	AT2G36890	RAX2
	AT2G38180	AT2G38180
	AT1G02930	GSTF6
	AT5G02420	SMR3
	AT4G18360	GLO5
	AT1G11040	AT1G11040
	AT4G26590	OPT5
	AT4G28390	AAC3
	AT3G10040	AT3G10040
	AT4G31877	MIR156C
	AT3G56220	AT3G56220
	AT3G57780	AT3G57780
	AT1G73680	DOX2
	AT3G44310	NIT1

## Sheet: 82
AT1G12240	BFRUCT4
AT1G15380	AT1G15380
AT1G22885	AT1G22885
AT1G23310	GGAT1
AT1G29600	AT1G29600
AT1G29920	LHCB1.2
AT1G30360	ERD4
AT1G30820	AT1G30820
AT1G43670	AT1G43670
AT1G49450	AT1G49450
AT1G60950	FD2
AT1G64680	AT1G64680
AT1G65480	FT
AT1G65800	SD16
AT1G68190	AT1G68190
AT1G70700	TIFY7
AT1G70880	AT1G70880
AT1G77060	AT1G77060
AT1G80380	GLYK
AT2G01918	PQL3
AT2G13360	AGT1
AT2G22980	SCPL13
AT2G22990	SCPL8
AT2G28305	LOG1
AT2G30600	AT2G30600
AT2G31083	CLE5
AT2G33855	AT2G33855
AT2G34430	LHB1B1
AT2G34510	AT2G34510
AT2G45660	SOC1
AT2G47370	AT2G47370
AT2G48020	AT2G48020
AT3G02850	SKOR
AT3G03630	CS26
AT3G11090	LBD21
AT3G14770	SWEET2
AT3G15900	AT3G15900
AT3G16690	SWEET16
AT3G19030	AT3G19030
AT3G21870	CYCU1-1
AT3G23700	AT3G23700
AT3G28080	AT3G28080
AT3G47340	ASN1
AT3G47580	AT3G47580
AT3G48360	BT2
AT3G48390	AT3G48390
AT3G51420	SSL4
AT3G54880	AT3G54880
AT3G55040	GSTL2
AT3G57770	AT3G57770
AT3G61060	PP2A13
AT4G13810	AtRLP47
AT4G16880	AT4G16880
AT4G17970	ALMT12
AT4G24015	RHA4A
AT4G25830	AT4G25830
AT4G25910	NIFU3
AT4G27520	ENODL2
AT4G28080	AT4G28080
AT4G29610	CDA6
AT4G35250	AT4G35250
AT4G35900	FD
AT5G02940	AT5G02940
AT5G04980	AT5G04980
AT5G09820	PAP7
AT5G11070	AT5G11070
AT5G22390	AT5G22390
AT5G23120	HCF136
AT5G38510	AT5G38510
AT5G46890	AT5G46890
AT5G46900	AT5G46900
AT5G50915	BHLH137
AT5G50950	FUM2
AT5G51780	BHLH36
AT5G51795	AT5G51795
AT5G53580	PLR1
AT5G55570	AT5G55570
AT5G57170	AT5G57170
AT5G59080	AT5G59080
AT5G61410	RPE
AT5G62840	AT5G62840
AT5G63160	BT1

## Sheet: 83
AT1G08980	AMI1
AT1G11180	SCAMP5
AT1G12240	BFRUCT4
AT1G21680	AT1G21680
AT1G23310	GGAT1
AT1G29600	AT1G29600
AT1G29920	LHCB1.2
AT1G30360	ERD4
AT1G30820	AT1G30820
AT1G43670	AT1G43670
AT1G49450	AT1G49450
AT1G52870	AT1G52870
AT1G58370	RXF12
AT1G60950	FD2
AT1G64680	AT1G64680
AT1G65480	FT
AT1G68010	HPR
AT1G70700	TIFY7
AT1G70760	ndhL
AT1G80380	GLYK
AT2G04790	AT2G04790
AT2G22980	SCPL13
AT2G22990	SCPL8
AT2G28305	LOG1
AT2G30600	AT2G30600
AT2G31083	CLE5
AT2G33790	AGP30
AT2G33855	AT2G33855
AT2G34430	LHB1B1
AT2G34510	AT2G34510
AT2G36540	AT2G36540
AT2G36590	PROT3
AT2G39240	AT2G39240
AT2G45660	SOC1
AT2G47370	AT2G47370
AT2G48020	AT2G48020
AT3G15900	AT3G15900
AT3G19030	AT3G19030
AT3G23700	AT3G23700
AT3G24560	RSY3
AT3G26650	GAPA1
AT3G28080	AT3G28080
AT3G43540	AT3G43540
AT3G48360	BT2
AT3G48390	AT3G48390
AT3G55040	GSTL2
AT3G57770	AT3G57770
AT3G61060	PP2A13
AT3G63370	OTP86
AT4G12830	AT4G12830
AT4G16880	AT4G16880
AT4G17970	ALMT12
AT4G25270	PCMP-E53
AT4G25830	AT4G25830
AT4G27520	ENODL2
AT4G28080	AT4G28080
AT4G29610	CDA6
AT4G32860	AT4G32860
AT4G35250	AT4G35250
AT4G35900	FD
AT5G02940	AT5G02940
AT5G08650	AT5G08650
AT5G09820	PAP7
AT5G11070	AT5G11070
AT5G17165	AT5G17165
AT5G22390	AT5G22390
AT5G27290	AT5G27290
AT5G38520	AT5G38520
AT5G46890	AT5G46890
AT5G46900	AT5G46900
AT5G46915	AT5G46915
AT5G50915	BHLH137
AT5G50950	FUM2
AT5G51010	AT5G51010
AT5G51795	AT5G51795
AT5G55570	AT5G55570
AT5G57170	AT5G57170
AT5G59080	AT5G59080
AT5G60100	APRR3
AT5G61410	RPE
AT5G62840	AT5G62840
AT5G63160	BT1
AT5G64380	AT5G64380

## Sheet: 390
AT4G27140	2S1					GO biological process complete	#	#	expected	Fold Enrichment	+/-	P value
AT4G27160	2S3					carotene catabolic process	9	4	0.12	32.48	+	0.0111
AT4G27170	2S4					terpene catabolic process	9	4	0.12	32.48	+	0.0111
AT3G24650	ABI3					hydrocarbon catabolic process	10	4	0.14	29.23	+	0.0183
AT2G40220	ABI4					seed oilbody biogenesis	12	4	0.16	24.36	+	0.0422
AT5G13790	AGL15					isoprenoid catabolic process	25	7	0.34	20.46	+	8.91e-05
AT5G51760	AHG1					lipid storage	29	7	0.4	17.64	+	0.000276
AT1G72570	AIL1					nutrient storage	29	7	0.4	17.64	+	0.000276
AT5G57390	AIL5					seed dormancy process	42	8	0.57	13.92	+	0.000242
AT1G03880	CRB					dormancy process	42	8	0.57	13.92	+	0.000242
AT5G45830	DOG1					gibberellin metabolic process	33	6	0.45	13.29	+	0.0138
AT3G44460	DPBF2					seed maturation	70	12	0.96	12.53	+	5.09e-07
AT2G41070	DPBF4					multicellular organismal reproductive process	202	17	2.76	6.15	+	8.54e-06
AT2G30580	DRIP2					cellular response to hypoxia	237	15	3.24	4.62	+	0.00294
AT5G10140	FLC					cellular response to decreased oxygen levels	239	15	3.27	4.59	+	0.00327
AT3G26790	FUS3					cellular response to oxygen levels	240	15	3.28	4.57	+	0.00344
AT4G02780	GA1					response to hypoxia	267	16	3.65	4.38	+	0.00266
AT5G07200	GA20OX3					response to decreased oxygen levels	271	16	3.71	4.31	+	0.00324
AT5G59220	HAI1					response to oxygen levels	273	16	3.74	4.28	+	0.00357
AT3G21720	ICL					developmental maturation	223	13	3.05	4.26	+	0.0371
AT1G25410	IPT6					response to auxin	350	17	4.79	3.55	+	0.021
AT2G21490	LEA					response to abscisic acid	545	25	7.46	3.35	+	0.000458
AT2G35300	LEA18					response to alcohol	554	25	7.58	3.3	+	0.000622
AT1G18100	MFT					seed development	776	30	10.62	2.82	+	0.00107
AT1G78390	NCED9					fruit development	805	30	11.02	2.72	+	0.00229
AT4G25140	OLEO1					response to hormone	1399	52	19.15	2.72	+	1.68e-07
AT5G51210	OLEO3					response to endogenous stimulus	1400	52	19.16	2.71	+	1.72e-07
AT3G27660	OLEO4					shoot system development	790	29	10.81	2.68	+	0.00472
AT5G07500	PEI1					response to lipid	912	33	12.48	2.64	+	0.00123
AT4G31615	REM2					reproductive structure development	1284	44	17.57	2.5	+	0.0001
AT5G17810	WOX12					reproductive system development	1286	44	17.6	2.5	+	0.000102
AT2G28610	WOX3					response to chemical	2756	89	37.72	2.36	+	3.44e-11
AT5G11320	YUC4					post-embryonic development	1583	49	21.66	2.26	+	0.000366
AT4G28390	AAC3					cellular response to chemical stimulus	1131	35	15.48	2.26	+	0.0242
AT2G39350	ABCG1					response to oxygen-containing compound	1603	49	21.94	2.23	+	0.000439
AT5G27630	ACBP5					system development	2042	62	27.95	2.22	+	9.77e-06
AT1G01480	ACS2					developmental process involved in reproduction	1547	47	21.17	2.22	+	0.000962
AT2G22810	ACS4					response to abiotic stimulus	2275	62	31.13	1.99	+	0.000588
AT3G57510	ADPG1					reproductive process	1856	49	25.4	1.93	+	0.0277
AT2G41850	ADPG2					response to stress	3500	92	47.9	1.92	+	1.09e-06
AT1G06080	ADS1					multicellular organism development	2642	69	36.16	1.91	+	0.000383
AT3G58780	AGL1					multicellular organismal process	2930	73	40.1	1.82	+	0.00131
AT1G33960	AIG1					response to stimulus	6027	149	82.48	1.81	+	1.82e-11
AT5G39720	AIG2L					developmental process	3192	76	43.68	1.74	+	0.00363
AT5G65510	AIL7					anatomical structure development	3087	73	42.25	1.73	+	0.00872
AT1G07430	AIP1
AT1G08440	ALMT2
AT2G27240	ALMT7
AT2G25940	ALPHA-VPE
AT4G28530	anac074
AT5G64530	ANAC104
AT4G03050	AOP3
AT1G62290	APA2
AT4G39210	APL3
AT5G56510	APUM12
AT3G21860	ASK10
AT1G02770	AT1G02770
AT1G03106	AT1G03106
AT1G11040	AT1G11040
AT1G11170	AT1G11170
AT1G12070	AT1G12070
AT1G19960	AT1G19960
AT1G22100	AT1G22100
AT1G22250	AT1G22250
AT1G23000	AT1G23000
AT1G23040	AT1G23040
AT1G23140	AT1G23140
AT1G25530	AT1G25530
AT1G26380	AT1G26380
AT1G26410	AT1G26410
AT1G26420	AT1G26420
AT1G26590	AT1G26590
AT1G28640	AT1G28640
AT1G28650	AT1G28650
AT1G29680	AT1G29680
AT1G32710	AT1G32710
AT1G32860	AT1G32860
AT1G51530	AT1G51530
AT1G52110	AT1G52110
AT1G54020	AT1G54020
AT1G54575	AT1G54575
AT1G55700	AT1G55700
AT1G59950	AT1G59950
AT1G62580	AT1G62580
AT1G62840	AT1G62840
AT1G64405	AT1G64405
AT1G66360	AT1G66360
AT1G68170	AT1G68170
AT1G68470	AT1G68470
AT1G70260	AT1G70260
AT1G74205	AT1G74205
AT1G74990	AT1G74990
AT1G75580	AT1G75580
AT1G77655	AT1G77655
AT1G80130	AT1G80130
AT2G21780	AT2G21780
AT2G21930	AT2G21930
AT2G22180	AT2G22180
AT2G26130	AT2G26130
AT2G32960	AT2G32960
AT2G33520	AT2G33520
AT2G34185	AT2G34185
AT2G36210	AT2G36210
AT2G37370	AT2G37370
AT2G38180	AT2G38180
AT2G41225	AT2G41225
AT2G41360	AT2G41360
AT2G41730	AT2G41730
AT2G42990	AT2G42990
AT2G44800	AT2G44800
AT2G45360	AT2G45360
AT2G45900	AT2G45900
AT2G47050	AT2G47050
AT3G01570	AT3G01570
AT3G05150	AT3G05150
AT3G05980	AT3G05980
AT3G10040	AT3G10040
AT3G13130	AT3G13130
AT3G13437	AT3G13437
AT3G14360	AT3G14360
AT3G15670	AT3G15670
AT3G16150	AT3G16150
AT3G18250	AT3G18250
AT3G18280	AT3G18280
AT3G22550	AT3G22550
AT3G22560	AT3G22560
AT3G23870	AT3G23870
AT3G24450	AT3G24450
AT3G25795	AT3G25795
AT3G27025	AT3G27025
AT3G27220	AT3G27220
AT3G27250	AT3G27250
AT3G27400	AT3G27400
AT3G27415	AT3G27415
AT3G48510	AT3G48510
AT3G53690	AT3G53690
AT3G54510	AT3G54510
AT3G54940	AT3G54940
AT3G55240	AT3G55240
AT3G56220	AT3G56220
AT3G57780	AT3G57780
AT3G60540	AT3G60540
AT4G01985	AT4G01985
AT4G02360	AT4G02360
AT4G03450	AT4G03450
AT4G05030	AT4G05030
AT4G10270	AT4G10270
AT4G10490	AT4G10490
AT4G11040	AT4G11040
AT4G11350	AT4G11350
AT4G12210	AT4G12210
AT4G12490	AT4G12490
AT4G12735	AT4G12735
AT4G14780	AT4G14780
AT4G14980	AT4G14980
AT4G16620	AT4G16620
AT4G18650	AT4G18650
AT4G19810	AT4G19810
AT4G21500	AT4G21500
AT4G22730	AT4G22730
AT4G27250	AT4G27250
AT4G27810	AT4G27810
AT4G29240	AT4G29240
AT4G31830	AT4G31830
AT4G32295	AT4G32295
AT4G32460	AT4G32460
AT4G34320	AT4G34320
AT4G35070	AT4G35070
AT4G36700	AT4G36700
AT4G39700	AT4G39700
AT5G01660	AT5G01660
AT5G02580	AT5G02580
AT5G02760	AT5G02760
AT5G03668	AT5G03668
AT5G03670	AT5G03670
AT5G03795	AT5G03795
AT5G04500	AT5G04500
AT5G07330	AT5G07330
AT5G09540	AT5G09540
AT5G16460	AT5G16460
AT5G20790	AT5G20790
AT5G20810	AT5G20810
AT5G21280	AT5G21280
AT5G22460	AT5G22460
AT5G22580	AT5G22580
AT5G24130	AT5G24130
AT5G25470	AT5G25470
AT5G25820	AT5G25820
AT5G38900	AT5G38900
AT5G41460	AT5G41460
AT5G42530	AT5G42530
AT5G42830	AT5G42830
AT5G44220	AT5G44220
AT5G44360	AT5G44360
AT5G47060	AT5G47060
AT5G50330	AT5G50330
AT5G50360	AT5G50360
AT5G51850	AT5G51850
AT5G53420	AT5G53420
AT5G53820	AT5G53820
AT5G54300	AT5G54300
AT5G55620	AT5G55620
AT5G57123	AT5G57123
AT5G57785	AT5G57785
AT5G57790	AT5G57790
AT5G59170	AT5G59170
AT5G60460	AT5G60460
AT5G60760	AT5G60760
AT5G61610	AT5G61610
AT5G62800	AT5G62800
AT5G63087	AT5G63087
AT5G63350	AT5G63350
AT1G47510	AT5PTASE11
AT1G07645	ATDSI-1VOC
AT2G36640	ATECP63
AT2G44910	ATHB-4
AT2G31180	ATMYB14
AT1G73220	AtOCT1
AT3G47420	ATPS3
AT1G03120	ATRAB28
AT2G33020	AtRLP24
AT5G07190	ATS3
AT3G28150	AXY4L
AT4G12470	AZI1
AT4G15210	BAM5
AT1G50110	BCAT6
AT2G44460	BGLU28
AT2G44470	BGLU29
AT3G60140	BGLU30
AT1G26560	BGLU40
AT3G19500	BHLH113
AT4G28790	BHLH23
AT2G27990	BLH8
AT1G62710	bVPE
AT4G37990	CAD8
AT2G36500	CBSCBSPB2
AT2G14520	CBSDUF3
AT4G32810	CCD8
AT5G50260	CEP1
AT2G43570	CHI
AT3G12500	CHI-B
AT5G41610	CHX18
AT5G01820	CIPK14
AT3G25905	CLE27
AT5G43860	CLH2
AT3G42670	CLSY1
AT4G14640	CML8
AT5G44120	CRA1
AT4G15396	CYP702A6
AT2G46950	CYP709B2
AT2G30750	CYP71A12
AT5G25180	CYP71B14
AT5G09970	CYP78A7
AT4G31970	CYP82C2
AT5G28020	CYSD2
AT3G49620	DIN11
AT1G73680	DOX2
AT2G38340	DREB2E
AT5G18450	DREB2G
AT3G21500	DXPS1
AT5G65100	EIL5
AT5G53870	ENODL1
AT4G05110	ENT6
AT5G25190	ERF003
AT1G36060	ERF055
AT2G47520	ERF071
AT5G13330	ERF113
AT5G61890	ERF114
AT5G07310	ERF115
AT5G62230	ERL1
AT3G15370	EXPA12
AT1G21310	EXT3
AT2G26310	FAP2
AT5G22500	FAR1
AT1G19250	FMO1
AT1G47990	GA2OX4
AT5G56300	GAMT2
AT1G32900	GBSS1
AT5G20635	GG3
AT2G23170	GH3.3
AT4G18360	GLO5
AT1G21360	GLTP2
AT1G61800	GPT2
AT5G07530	GRP17
AT4G33040	GRXC6
AT5G44700	GSO2
AT1G63440	HMA5
AT1G12550	HPR3
AT4G10020	HSD5
AT2G46990	IAA20
AT5G55250	IAMT1
AT3G02410	ICMEL2
AT4G34860	INVB
AT2G22240	IPS2
AT2G39330	JAL23
AT2G43000	JUB1
AT1G70510	KNAT2
AT2G40470	LBD15
AT1G67100	LBD40
AT1G68510	LBD42
AT2G40100	LHCB4.3
AT5G12330	LRP1
AT5G24655	LSU4
AT2G38530	LTP2
AT4G31877	MIR156C
AT1G67481	MIR839A
AT3G48850	MPT2
AT3G58060	MTPC3
AT2G32460	MYB101
AT5G49330	MYB111
AT1G48000	MYB112
AT1G68320	MYB62
AT1G66390	MYB90
AT1G02230	NAC004
AT3G44350	NAC061
AT4G18350	NCED2
AT1G30100	NCED5
AT1G02450	NIMIN-1
AT3G44310	NIT1
AT5G22300	NIT4
AT2G26870	NPC2
AT4G21680	NPF7.2
AT1G53690	NRPB12L
AT1G63020	NRPD1
AT2G40030	NRPE1
AT2G33070	NSP2
AT1G05420	OFP12
AT4G26590	OPT5
AT2G41230	ORS1
AT3G17790	PAP17
AT3G52780	PAP20
AT5G15120	PCO1
AT5G39890	PCO2
AT3G44830	PDAT2
AT4G33070	PDC1
AT1G75830	PDF1.1
AT5G44420	PDF1.2A
AT2G26020	PDF1.2B
AT2G02120	PDF2.1
AT2G24800	PER18
AT3G03670	PER28
AT4G25980	PER43
AT5G06720	PER53
AT5G19880	PER58
AT5G64120	PER71
AT2G32830	PHT1-5
AT1G20860	PHT1-8
AT2G34650	PID
AT3G54820	PIP2-5
AT1G60890	PIP5K8
AT4G16820	PLA-I{beta]2
AT3G05630	PLDP2
AT2G26440	PME12
AT3G14300	PME26
AT4G02330	PME41
AT1G11370	PME56
AT5G24560	PP2B12
AT2G19770	PRO4
AT5G18320	PUB46
AT5G09470	PUMP6
AT2G38920	RF178
AT2G02990	RNS1
AT3G53232	RTFL1
AT2G45210	SAUR36
AT5G65165	SDH2-3
AT5G27360	SFP2
AT4G27970	SLAH2
AT5G02420	SMR3
AT1G70440	SRO3
AT1G74000	SSL11
AT1G13430	STO9
AT1G71890	SUC5
AT3G04380	SUVR4
AT5G13170	SWEET15
AT5G11100	SYT4
AT1G30660	T5I8.11
AT1G29050	TBL38
AT2G45290	TKL-2
AT1G35910	TPPD
AT1G05680	UGT74E2
AT1G30530	UGT78D1
AT3G21560	UGT84A2
AT2G16890	UGT90A1
AT5G49690	UGT91C1
AT3G11260	WOX5
AT2G47260	WRKY23
AT4G18170	WRKY28
AT2G25000	WRKY60
AT3G52770	ZPR3
AT1G58330	ZW2

## Sheet: 56
AT1G12240	BFRUCT4
AT1G23310	GGAT1
AT1G29600	AT1G29600					GO biological process complete	#	#	expected	Fold Enrichment	+/-	P value
AT1G29920	LHCB1.2					photosynthesis, light harvesting in photosystem I	23	3	0.05	63.99	+	0.0372
AT1G30360	ERD4					photosynthesis, light reaction	133	5	0.27	18.44	+	0.0208
AT1G30820	AT1G30820					photosynthesis	190	6	0.39	15.49	+	0.00664
AT1G43670	AT1G43670					generation of precursor metabolites and energy	394	7	0.8	8.72	+	0.0404
AT1G49450	AT1G49450
AT1G60950	FD2
AT1G64680	AT1G64680
AT1G65480	FT
AT1G70700	TIFY7
AT1G80380	GLYK
AT2G22980	SCPL13
AT2G22990	SCPL8
AT2G28305	LOG1
AT2G30600	AT2G30600
AT2G31083	CLE5
AT2G33855	AT2G33855
AT2G34430	LHB1B1
AT2G34510	AT2G34510
AT2G45660	SOC1
AT2G47370	AT2G47370
AT2G48020	AT2G48020
AT3G15900	AT3G15900
AT3G19030	AT3G19030
AT3G23700	AT3G23700
AT3G28080	AT3G28080
AT3G48360	BT2
AT3G48390	AT3G48390
AT3G55040	GSTL2
AT3G57770	AT3G57770
AT3G61060	PP2A13
AT4G16880	AT4G16880
AT4G17970	ALMT12
AT4G25830	AT4G25830
AT4G27520	ENODL2
AT4G28080	AT4G28080
AT4G29610	CDA6
AT4G35250	AT4G35250
AT4G35900	FD
AT5G02940	AT5G02940
AT5G09820	PAP7
AT5G11070	AT5G11070
AT5G22390	AT5G22390
AT5G46890	AT5G46890
AT5G46900	AT5G46900
AT5G50915	BHLH137
AT5G50950	FUM2
AT5G51795	AT5G51795
AT5G55570	AT5G55570
AT5G57170	AT5G57170
AT5G59080	AT5G59080
AT5G61410	RPE
AT5G62840	AT5G62840
AT5G63160	BT1
